# Supplementary material for: Interchromosomal segmental duplication drives translocation and loss of P. falciparum histidine-rich protein 3
Source: eLife. 2024 Oct 7;13:RP93534. doi: 10.7554/eLife.93534 (PMC11458181; doi:10.7554/eLife.93534)
Supplement: Supplementary file 1. — This table includes information on the publicly available, whole-genome-sequenced samples used for primary analysis including the identification number, sample name, country, collection year and date, region, and pfhrp2/3 deletion pattern. [file elife-93534-supp1.xlsx]

## Sheet: Table S1 Sample Metadata
Supplementary File 1: Metadata on P. falciparum Samples. This table includes information on the publicly available, whole- genome-sequenced samples used for primary analysis including the identification number, sample name, country, collection year and date, region, and pfhrp2/3 deletion pattern.
country=Country that sample was collected in site=sub region within country if available collection_year=Year that sample was collected Sample=Sample name IsFieldSample=Denotes whether sample was a field or lab strain Region=Region that sample was collected in subRegion=another layer of region SecondaryRegion=Continent that sample was collected in HRP2Call=Denotes if HRP2 gene is present in sampl…
country	site	collection_year	sample	collection_date	region	subRegion	secondaryRegion	IsFieldSample	HRP2Call	HRP3Call	Chr11TelemericCall	HRPsCall	SRARuns	Pattern	meanPerBaseCov	uncallable
Mauritania	Kobeni	2014	FP0030-C	NA	West Africa	West Africa	AFRICA	TRUE	present	present	deletion	pfhrp2+/pfhrp3+	ERR1099212	11-TARE1	370.99	FALSE
Brazil	Mancio Lima	2016	IGS-BRA-001sA	NA	South America - Central	South America	S_AMERICA	TRUE	deletion	deletion	uncallable	pfhrp2-/pfhrp3-	SRR7464743,SRR7464744	13-11++	246	FALSE
Brazil	Cruzeiro do Sul	2016	IGS-BRA-002sA	NA	South America - Central	South America	S_AMERICA	TRUE	present	deletion	uncallable	pfhrp2+/pfhrp3-	SRR7464754,SRR7464755	13-11++	193.709	FALSE
Brazil	Rodrigues Alves	2016	IGS-BRA-004sA	NA	South America - Central	South America	S_AMERICA	TRUE	deletion	deletion	uncallable	pfhrp2-/pfhrp3-	SRR7464748,SRR7464749	13-11++	293.184	FALSE
Brazil	Mancio Lima	2016	IGS-BRA-005sA	NA	South America - Central	South America	S_AMERICA	TRUE	present	deletion	uncallable	pfhrp2+/pfhrp3-	SRR7464750,SRR7464751	13-11++	216.814	FALSE
Brazil	Mancio Lima	2016	IGS-BRA-006sA	NA	South America - Central	South America	S_AMERICA	TRUE	present	deletion	uncallable	pfhrp2+/pfhrp3-	SRR7464752,SRR7464753	13-11++	365.922	FALSE
Brazil	Mancio Lima	2016	IGS-BRA-008sA	NA	South America - Central	South America	S_AMERICA	TRUE	present	deletion	uncallable	pfhrp2+/pfhrp3-	SRR7464756,SRR7464757	13-11++	188.107	FALSE
Brazil	Mancio Lima	2016	IGS-BRA-009sA	NA	South America - Central	South America	S_AMERICA	TRUE	present	deletion	uncallable	pfhrp2+/pfhrp3-	SRR7464758,SRR7464759,SRR7464760	13-11++	310.125	FALSE
Brazil	Mancio Lima	2017	IGS-BRA-010sA	NA	South America - Central	South America	S_AMERICA	TRUE	present	deletion	uncallable	pfhrp2+/pfhrp3-	SRR7464761,SRR7464762	13-11++	229.213	FALSE
Brazil	Mancio Lima	2017	IGS-BRA-011sA	NA	South America - Central	South America	S_AMERICA	TRUE	present	deletion	uncallable	pfhrp2+/pfhrp3-	SRR7464763,SRR7464764	13-11++	182.16	FALSE
Brazil	Mancio Lima	2017	IGS-BRA-012sA	NA	South America - Central	South America	S_AMERICA	TRUE	present	deletion	uncallable	pfhrp2+/pfhrp3-	SRR7464790,SRR7464791	13-11++	202.835	FALSE
Brazil	Mancio Lima	2017	IGS-BRA-013sA	NA	South America - Central	South America	S_AMERICA	TRUE	deletion	deletion	uncallable	pfhrp2-/pfhrp3-	SRR7464767,SRR7464768	13-11++	240.708	FALSE
Brazil	Mancio Lima	2017	IGS-BRA-014sA	NA	South America - Central	South America	S_AMERICA	TRUE	present	deletion	uncallable	pfhrp2+/pfhrp3-	SRR7464769,SRR7464770	13-11++	218.628	FALSE
Brazil	Cruzeiro do Sul	2016	IGS-BRA-019sA	NA	South America - Central	South America	S_AMERICA	TRUE	present	deletion	uncallable	pfhrp2+/pfhrp3-	SRR7464779,SRR7464780	13-11++	244.855	FALSE
Brazil	Mancio Lima	2016	IGS-BRA-020sA	NA	South America - Central	South America	S_AMERICA	TRUE	present	deletion	uncallable	pfhrp2+/pfhrp3-	SRR7464824,SRR7464825	13-11++	207.736	FALSE
Cambodia	NA	2010	IGS-CBD-010	NA	South East Asia - East	Oceania-SEA	ASIA	TRUE	present	deletion	uncallable	pfhrp2+/pfhrp3-	SRR5346279,SRR5346280	13-11++	114.392	FALSE
Cambodia	NA	2011	IGS-CBD-015	NA	South East Asia - East	Oceania-SEA	ASIA	TRUE	present	deletion	uncallable	pfhrp2+/pfhrp3-	SRR5346284	13-5++	116.276	FALSE
Cambodia	NA	2011	IGS-CBD-020	NA	South East Asia - East	Oceania-SEA	ASIA	TRUE	present	deletion	uncallable	pfhrp2+/pfhrp3-	SRR5360299,SRR5360300,SRR5360301,SRR5360302	13-5++	140.504	FALSE
Cambodia	NA	2011	IGS-CBD-031	NA	South East Asia - East	Oceania-SEA	ASIA	TRUE	deletion	present	uncallable	pfhrp2-/pfhrp3+	SRR5346348	NA	88.4396	FALSE
Cambodia	NA	2011	IGS-CBD-036	NA	South East Asia - East	Oceania-SEA	ASIA	TRUE	present	deletion	uncallable	pfhrp2+/pfhrp3-	SRR5360322,SRR5360323,SRR5360325	13-5++	319.782	FALSE
Cambodia	NA	2011	IGS-CBD-042	NA	South East Asia - East	Oceania-SEA	ASIA	TRUE	present	present	deletion	pfhrp2+/pfhrp3+	SRR5346369	11-TARE1	113.243	FALSE
Cambodia	NA	2011	IGS-CBD-044	NA	South East Asia - East	Oceania-SEA	ASIA	TRUE	present	deletion	uncallable	pfhrp2+/pfhrp3-	SRR5346377	13-5++	122.087	FALSE
Cambodia	NA	2011	IGS-CBD-060	NA	South East Asia - East	Oceania-SEA	ASIA	TRUE	present	deletion	uncallable	pfhrp2+/pfhrp3-	SRR5346445	13-5++	118.932	FALSE
Cambodia	NA	2011	IGS-CBD-093	NA	South East Asia - East	Oceania-SEA	ASIA	TRUE	present	deletion	uncallable	pfhrp2+/pfhrp3-	SRR5346510	13-5++	136.952	FALSE
Cambodia	NA	2012	IGS-CBD-121	NA	South East Asia - East	Oceania-SEA	ASIA	TRUE	present	present	deletion	pfhrp2+/pfhrp3+	SRR5360236,SRR5360238,SRR5360239,SRR5360240	11-TARE1	222.881	FALSE
Cambodia	NA	2012	IGS-CBD-122	NA	South East Asia - East	Oceania-SEA	ASIA	TRUE	present	deletion	uncallable	pfhrp2+/pfhrp3-	SRR5346869,SRR5360169	13-5++	161.599	FALSE
Mali	NA	2010	IGS-MLI-036	NA	West Africa	West Africa	AFRICA	TRUE	present	deletion	uncallable	pfhrp2+/pfhrp3-	SRR5346181	13-11++	84.7336	FALSE
Thailand	NA	2014	IGS-THL-028	NA	South East Asia - West	Oceania-SEA	ASIA	TRUE	present	present	deletion	pfhrp2+/pfhrp3+	SRR5346245	11-TARE1	134.789	FALSE
Cambodia	Tasanh	2011	IVC11-BB-0084	2011-07-30	South East Asia - East	Oceania-SEA	ASIA	TRUE	present	deletion	uncallable	pfhrp2+/pfhrp3-	SRR2318682	13-5++	31.6622	FALSE
French Guiana	Saint Georges de l'Oyapock	2009	M113-A	2009-03-23	South America - Central	South America	S_AMERICA	TRUE	present	deletion	uncallable	pfhrp2+/pfhrp3-	SRR1029821	13-11++	55.6729	FALSE
French Guiana	Camopi	2010	N071-I	2010-02-09	South America - Central	South America	S_AMERICA	TRUE	present	deletion	uncallable	pfhrp2+/pfhrp3-	SRR1029769	13-11++	68.1622	FALSE
French Guiana	NA	2010	N277-D28	NA	South America - Central	South America	S_AMERICA	TRUE	present	deletion	uncallable	pfhrp2+/pfhrp3-	SRR2099719,SRR2104420	13-11++	63.7471	FALSE
French Guiana	Cayenne	2010	N497-C	2010-11-19	South America - Central	South America	S_AMERICA	TRUE	present	deletion	uncallable	pfhrp2+/pfhrp3-	SRR1029756	13-11++	57.1567	FALSE
The Gambia	Brikama	2008	PA0011-C	NA	West Africa	West Africa	AFRICA	TRUE	present	present	deletion	pfhrp2+/pfhrp3+	ERR015410	11-TARE1	172.254	FALSE
Kenya	Kilifi	2007	PC0019-C	NA	East Africa	East Africa	AFRICA	TRUE	present	deletion	uncallable	pfhrp2+/pfhrp3-	ERR012227	13-TARE1	80.2522	FALSE
Thailand	Mae Sot	2005	PD0122-C	NA	South East Asia - West	Oceania-SEA	ASIA	TRUE	present	present	deletion	pfhrp2+/pfhrp3+	ERR027086	11-TARE1	67.2298	FALSE
Thailand	Mae Sot	2005	PD0129-C	NA	South East Asia - West	Oceania-SEA	ASIA	TRUE	present	deletion	uncallable	pfhrp2+/pfhrp3-	ERR033031	13-11++	292.584	FALSE
Thailand	Mae Sot	2012	PD0555-C	NA	South East Asia - West	Oceania-SEA	ASIA	TRUE	present	present	deletion	pfhrp2+/pfhrp3+	ERR216518	11-TARE1	83.683	FALSE
Thailand	Ranong	2012	PD0583-C	NA	South East Asia - West	Oceania-SEA	ASIA	TRUE	present	present	deletion	pfhrp2+/pfhrp3+	ERR248949	11-TARE1	36.4725	FALSE
Thailand	Ranong	2012	PD0584-C	NA	South East Asia - West	Oceania-SEA	ASIA	TRUE	present	present	deletion	pfhrp2+/pfhrp3+	ERR248939	11-TARE1	111.928	FALSE
Thailand	Ranong	2012	PD0587-C	NA	South East Asia - West	Oceania-SEA	ASIA	TRUE	present	present	deletion	pfhrp2+/pfhrp3+	ERR337555	11-TARE1	120.509	FALSE
Thailand	Mae Sot	2013	PD0875-C	NA	South East Asia - West	Oceania-SEA	ASIA	TRUE	present	present	deletion	pfhrp2+/pfhrp3+	ERR580441	11-TARE1	168.85	FALSE
Thailand	Mae Sot	2012	PD1172-C	NA	South East Asia - West	Oceania-SEA	ASIA	TRUE	present	present	deletion	pfhrp2+/pfhrp3+	ERR596133	11-TARE1	77.6636	FALSE
Thailand	Mae Sot	2002	PD1299-C	NA	South East Asia - West	Oceania-SEA	ASIA	TRUE	present	deletion	uncallable	pfhrp2+/pfhrp3-	ERR676572	13-TARE1	53.0916	FALSE
Thailand	Mae Sot	2005	PD1430-C	NA	South East Asia - West	Oceania-SEA	ASIA	TRUE	present	deletion	uncallable	pfhrp2+/pfhrp3-	ERR689407	13-TARE1	140.856	FALSE
Ghana	Navrongo	2010	PF0542-C	2011-04-07	West Africa	West Africa	AFRICA	TRUE	present	deletion	uncallable	pfhrp2+/pfhrp3-	ERR114388	13-11++	81.8265	FALSE
Ghana	Kintampo	2012	PF0584-C	2012-09-01	West Africa	West Africa	AFRICA	TRUE	present	deletion	uncallable	pfhrp2+/pfhrp3-	ERR234555	13-TARE1	98.7834	FALSE
Ghana	Navrongo	2013	PF0769-C	2013-05-09	West Africa	West Africa	AFRICA	TRUE	present	present	deletion	pfhrp2+/pfhrp3+	ERR450105	11-TARE1	197.796	FALSE
Ghana	Navrongo	2013	PF0973-C	NA	West Africa	West Africa	AFRICA	TRUE	present	present	deletion	pfhrp2+/pfhrp3+	ERR586119	11-TARE1	282.372	FALSE
Cambodia	Tasanh	2009	PH0143-C	NA	South East Asia - East	Oceania-SEA	ASIA	TRUE	present	deletion	uncallable	pfhrp2+/pfhrp3-	ERR036582	13-5++	183.44	FALSE
Cambodia	Tasanh	2009	PH0149-C	NA	South East Asia - East	Oceania-SEA	ASIA	TRUE	present	deletion	uncallable	pfhrp2+/pfhrp3-	ERR036590	13-TARE1	150.4	FALSE
Cambodia	Tasanh	2009	PH0153-C	NA	South East Asia - East	Oceania-SEA	ASIA	TRUE	present	deletion	uncallable	pfhrp2+/pfhrp3-	ERR036594	13-TARE1	69.8922	FALSE
Cambodia	Tasanh	2009	PH0156-C	NA	South East Asia - East	Oceania-SEA	ASIA	TRUE	present	deletion	uncallable	pfhrp2+/pfhrp3-	ERR022854	13-TARE1	59.7732	FALSE
Cambodia	Pailin	2010	PH0229-C	NA	South East Asia - East	Oceania-SEA	ASIA	TRUE	present	deletion	uncallable	pfhrp2+/pfhrp3-	ERR039889	13-5++	59.0284	FALSE
Cambodia	Pursat	2010	PH0274-C	NA	South East Asia - East	Oceania-SEA	ASIA	TRUE	present	deletion	uncallable	pfhrp2+/pfhrp3-	ERR042667	13-5++	191.661	FALSE
Cambodia	Pursat	2010	PH0278-CW	NA	South East Asia - East	Oceania-SEA	ASIA	TRUE	present	deletion	uncallable	pfhrp2+/pfhrp3-	ERR043319	13-5++	150.012	FALSE
Cambodia	Pursat	2010	PH0308-CW	NA	South East Asia - East	Oceania-SEA	ASIA	TRUE	present	deletion	uncallable	pfhrp2+/pfhrp3-	ERR043325	13-5++	120.117	FALSE
Cambodia	Tasanh	2009	PH0387-C	NA	South East Asia - East	Oceania-SEA	ASIA	TRUE	present	deletion	uncallable	pfhrp2+/pfhrp3-	ERR040035	13-TARE1	18.1179	FALSE
Cambodia	Tasanh	2009	PH0395-C	NA	South East Asia - East	Oceania-SEA	ASIA	TRUE	present	deletion	uncallable	pfhrp2+/pfhrp3-	ERR040000	13-TARE1	10.6604	FALSE
Cambodia	Tasanh	2009	PH0397-C	NA	South East Asia - East	Oceania-SEA	ASIA	TRUE	present	deletion	uncallable	pfhrp2+/pfhrp3-	ERR040008	13-5++	15.3018	FALSE
Cambodia	Tasanh	2009	PH0412-C	NA	South East Asia - East	Oceania-SEA	ASIA	TRUE	present	deletion	uncallable	pfhrp2+/pfhrp3-	ERR039895	13-TARE1	16.62	FALSE
Cambodia	Tasanh	2009	PH0413-C	NA	South East Asia - East	Oceania-SEA	ASIA	TRUE	present	deletion	uncallable	pfhrp2+/pfhrp3-	ERR039912	13-5++	22.5349	FALSE
Cambodia	Tasanh	2008	PH0416-C	NA	South East Asia - East	Oceania-SEA	ASIA	TRUE	present	deletion	uncallable	pfhrp2+/pfhrp3-	ERR039983	13-5++	19.557	FALSE
Cambodia	Pailin	2008	PH0447-C	NA	South East Asia - East	Oceania-SEA	ASIA	TRUE	present	present	deletion	pfhrp2+/pfhrp3+	ERR039915	11-TARE1	10.4714	FALSE
Cambodia	Pursat	2010	PH0457-C	NA	South East Asia - East	Oceania-SEA	ASIA	TRUE	present	deletion	uncallable	pfhrp2+/pfhrp3-	ERR043326	13-5++	50.5145	FALSE
Cambodia	Pursat	2010	PH0467-C	NA	South East Asia - East	Oceania-SEA	ASIA	TRUE	present	deletion	uncallable	pfhrp2+/pfhrp3-	ERR043331	13-5++	37.5627	FALSE
Cambodia	Pursat	2010	PH0474-C	NA	South East Asia - East	Oceania-SEA	ASIA	TRUE	present	deletion	uncallable	pfhrp2+/pfhrp3-	ERR043333	13-5++	67.1266	FALSE
Cambodia	Pursat	2010	PH0480-C	NA	South East Asia - East	Oceania-SEA	ASIA	TRUE	present	deletion	uncallable	pfhrp2+/pfhrp3-	ERR039874	13-5++	69.5023	FALSE
Cambodia	Pursat	2011	PH0529-C	NA	South East Asia - East	Oceania-SEA	ASIA	TRUE	present	deletion	uncallable	pfhrp2+/pfhrp3-	ERR205948	13-5++	21.49	FALSE
Cambodia	Pursat	2011	PH0534-C	NA	South East Asia - East	Oceania-SEA	ASIA	TRUE	present	deletion	uncallable	pfhrp2+/pfhrp3-	ERR063620	13-5++	86.4469	FALSE
Cambodia	Pursat	2011	PH0544-C	NA	South East Asia - East	Oceania-SEA	ASIA	TRUE	present	deletion	uncallable	pfhrp2+/pfhrp3-	ERR067569	13-5++	22.468	FALSE
Cambodia	Pursat	2011	PH0681-C	NA	South East Asia - East	Oceania-SEA	ASIA	TRUE	present	deletion	uncallable	pfhrp2+/pfhrp3-	ERR216650	13-5++	15.2364	FALSE
Cambodia	Pursat	2011	PH0697-C	NA	South East Asia - East	Oceania-SEA	ASIA	TRUE	present	deletion	uncallable	pfhrp2+/pfhrp3-	ERR175482	13-5++	17.0284	FALSE
Cambodia	Preah Vihear	2011	PH0738-C	NA	South East Asia - East	Oceania-SEA	ASIA	TRUE	present	present	deletion	pfhrp2+/pfhrp3+	ERR171605	11-TARE1	23.3987	FALSE
Cambodia	Pailin	2011	PH0817-C	NA	South East Asia - East	Oceania-SEA	ASIA	TRUE	present	deletion	uncallable	pfhrp2+/pfhrp3-	ERR175488	13-5++	89.2933	FALSE
Cambodia	Pailin	2012	PH0894-C	NA	South East Asia - East	Oceania-SEA	ASIA	TRUE	present	deletion	uncallable	pfhrp2+/pfhrp3-	ERR216555	13-5++	148.557	FALSE
Cambodia	Pursat	2012	PH0959-Cx	NA	South East Asia - East	Oceania-SEA	ASIA	TRUE	present	deletion	uncallable	pfhrp2+/pfhrp3-	ERR337586	13-5++	18.4137	FALSE
Cambodia	Preah Vihear	2013	PH1150-C	NA	South East Asia - East	Oceania-SEA	ASIA	TRUE	present	present	deletion	pfhrp2+/pfhrp3+	ERR539607	11-TARE1	17.5392	FALSE
Cambodia	Pursat	2013	PH1200-C	NA	South East Asia - East	Oceania-SEA	ASIA	TRUE	present	present	deletion	pfhrp2+/pfhrp3+	ERR539611	11-TARE1	38.2842	FALSE
Cambodia	Pursat	2013	PH1209-C	NA	South East Asia - East	Oceania-SEA	ASIA	TRUE	present	present	deletion	pfhrp2+/pfhrp3+	ERR590449	11-TARE1	19.8288	FALSE
Cambodia	Ratanakiri	2013	PH1310-C	NA	South East Asia - East	Oceania-SEA	ASIA	TRUE	present	deletion	uncallable	pfhrp2+/pfhrp3-	ERR539632	13-TARE1	154.498	FALSE
Cambodia	Pursat	2014	PH1402-C	NA	South East Asia - East	Oceania-SEA	ASIA	TRUE	present	present	deletion	pfhrp2+/pfhrp3+	ERR1172504	11-TARE1	16.859	FALSE
Cambodia	Ratanakiri	2014	PH1616-C	NA	South East Asia - East	Oceania-SEA	ASIA	TRUE	present	deletion	uncallable	pfhrp2+/pfhrp3-	ERR1172537	13-TARE1	16.7838	FALSE
Cambodia	Pursat	2014	PH1675-C	NA	South East Asia - East	Oceania-SEA	ASIA	TRUE	present	present	deletion	pfhrp2+/pfhrp3+	ERR1106619	11-TARE1	269.677	FALSE
Mali	Nioro du Sahel	2014	PM0602-C	NA	West Africa	West Africa	AFRICA	TRUE	present	present	deletion	pfhrp2+/pfhrp3+	ERR1063605	11-TARE1	106.75	FALSE
Papua New Guinea	Madang	2008	PN0014-C	NA	Papua New Guinea	Oceania-SEA	OCEANIA	TRUE	present	present	deletion	pfhrp2+/pfhrp3+	ERR175529	11-TARE1	47.6433	FALSE
Peru	Iquitos, Loreto Province	2011	PP0002-C	NA	South America - Central	South America	S_AMERICA	TRUE	deletion	present	uncallable	pfhrp2-/pfhrp3+	ERR012671,ERR012834,ERR037220,ERR038339	NA	93.8877	FALSE
Peru	Iquitos, Loreto Province	2011	PP0004-C	NA	South America - Central	South America	S_AMERICA	TRUE	present	deletion	uncallable	pfhrp2+/pfhrp3-	ERR012297,ERR012313	13-11++	84.6591	FALSE
Peru	Iquitos, Loreto Province	2011	PP0005-C	NA	South America - Central	South America	S_AMERICA	TRUE	present	deletion	uncallable	pfhrp2+/pfhrp3-	ERR019545	13-11++	273.387	FALSE
Peru	Iquitos, Loreto Province	2011	PP0010-C	NA	South America - Central	South America	S_AMERICA	TRUE	present	deletion	uncallable	pfhrp2+/pfhrp3-	ERR022856	13-11++	182.555	FALSE
Peru	Iquitos, Loreto Province	2011	PP0011-C	NA	South America - Central	South America	S_AMERICA	TRUE	deletion	present	uncallable	pfhrp2-/pfhrp3+	ERR022855	NA	256.447	FALSE
Peru	Iquitos, Loreto Province	2011	PP0013-C	NA	South America - Central	South America	S_AMERICA	TRUE	present	deletion	uncallable	pfhrp2+/pfhrp3-	ERR123900	13-11++	76.1911	FALSE
Peru	Iquitos, Loreto Province	2011	PP0017-C	NA	South America - Central	South America	S_AMERICA	TRUE	deletion	deletion	uncallable	pfhrp2-/pfhrp3-	ERR114340	13-11++	128.624	FALSE
Peru	Loreto	2009	PP0019-C	NA	South America - Central	South America	S_AMERICA	TRUE	present	deletion	uncallable	pfhrp2+/pfhrp3-	ERR590544	13-11++	179.394	FALSE
Peru	Loreto	2009	PP0020-C	NA	South America - Central	South America	S_AMERICA	TRUE	present	deletion	uncallable	pfhrp2+/pfhrp3-	ERR590545	13-11++	183.813	FALSE
Peru	Loreto	2009	PP0021-C	NA	South America - Central	South America	S_AMERICA	TRUE	present	deletion	uncallable	pfhrp2+/pfhrp3-	ERR590546	13-11++	195.771	FALSE
Peru	Loreto	2009	PP0023-C	NA	South America - Central	South America	S_AMERICA	TRUE	present	deletion	uncallable	pfhrp2+/pfhrp3-	ERR590548	13-11++	181.625	FALSE
Peru	Loreto	2009	PP0024-C	NA	South America - Central	South America	S_AMERICA	TRUE	deletion	deletion	uncallable	pfhrp2-/pfhrp3-	ERR590549	13-11++	162.69	FALSE
Peru	Loreto	2009	PP0025-C	NA	South America - Central	South America	S_AMERICA	TRUE	deletion	deletion	uncallable	pfhrp2-/pfhrp3-	ERR590550	13-11++	159.998	FALSE
Peru	Loreto	2009	PP0026-C	NA	South America - Central	South America	S_AMERICA	TRUE	deletion	deletion	uncallable	pfhrp2-/pfhrp3-	ERR590551	13-11++	120.648	FALSE
Peru	Loreto	2009	PP0027-C	NA	South America - Central	South America	S_AMERICA	TRUE	present	deletion	uncallable	pfhrp2+/pfhrp3-	ERR590552	13-11++	173.897	FALSE
Peru	Loreto	2009	PP0028-C	NA	South America - Central	South America	S_AMERICA	TRUE	deletion	deletion	uncallable	pfhrp2-/pfhrp3-	ERR590553	13-11++	161.763	FALSE
Peru	Loreto	2009	PP0029-C	NA	South America - Central	South America	S_AMERICA	TRUE	deletion	deletion	uncallable	pfhrp2-/pfhrp3-	ERR590554	13-11++	150.578	FALSE
Malawi	Chikwawa	2011	PT0023-C	NA	South East Africa	East Africa	AFRICA	TRUE	present	deletion	uncallable	pfhrp2+/pfhrp3-	ERR042687	13-	34.9366	FALSE
Malawi	Chikwawa	2011	PT0168-C	NA	South East Africa	East Africa	AFRICA	TRUE	present	present	deletion	pfhrp2+/pfhrp3+	ERR216583	11-TARE1	149.485	FALSE
Malawi	Chikwawa	2011	PT0169-C	NA	South East Africa	East Africa	AFRICA	TRUE	present	present	deletion	pfhrp2+/pfhrp3+	ERR216584	11-TARE1	181.533	FALSE
Vietnam	Binh Phuoc	2010	PV0035-C	NA	South East Asia - East	Oceania-SEA	ASIA	TRUE	present	deletion	uncallable	pfhrp2+/pfhrp3-	ERR022915	13-TARE1	136.094	FALSE
Vietnam	Phuoc Long	2010	PV0097-C	NA	South East Asia - East	Oceania-SEA	ASIA	TRUE	present	deletion	uncallable	pfhrp2+/pfhrp3-	ERR126469	13-TARE1	10.1821	FALSE
Vietnam	Phuoc Long	2010	PV0098-C	NA	South East Asia - East	Oceania-SEA	ASIA	TRUE	present	deletion	uncallable	pfhrp2+/pfhrp3-	ERR126447	13-TARE1	75.5026	FALSE
Vietnam	Phuoc Long	2010	PV0112-C	NA	South East Asia - East	Oceania-SEA	ASIA	TRUE	present	deletion	uncallable	pfhrp2+/pfhrp3-	ERR126553	13-TARE1	37.6087	FALSE
Vietnam	Phuoc Long	2010	PV0142-C	NA	South East Asia - East	Oceania-SEA	ASIA	TRUE	present	deletion	uncallable	pfhrp2+/pfhrp3-	ERR126425	13-TARE1	20.696	FALSE
Vietnam	Phuoc Long	2011	PV0194-C	NA	South East Asia - East	Oceania-SEA	ASIA	TRUE	present	deletion	uncallable	pfhrp2+/pfhrp3-	ERR126556	13-5++	35.9633	FALSE
Vietnam	Phuoc Long	2011	PV0226-C	NA	South East Asia - East	Oceania-SEA	ASIA	TRUE	present	present	deletion	pfhrp2+/pfhrp3+	ERR126401	11-TARE1	93.3492	FALSE
Vietnam	Binh Phuoc	2011	PV0257-C	NA	South East Asia - East	Oceania-SEA	ASIA	TRUE	present	deletion	uncallable	pfhrp2+/pfhrp3-	ERR180083	13-TARE1	58.7367	FALSE
Vietnam	Binh Phuoc	2011	PV0274-C	NA	South East Asia - East	Oceania-SEA	ASIA	TRUE	present	deletion	uncallable	pfhrp2+/pfhrp3-	ERR180071	13-TARE1	121.173	FALSE
Vietnam	Binh Phuoc	2012	PV0313-C	NA	South East Asia - East	Oceania-SEA	ASIA	TRUE	present	present	deletion	pfhrp2+/pfhrp3+	ERR221513	11-TARE1	153.15	FALSE
Colombia	NA	NA	PW0043-C	NA	South America - North	South America	S_AMERICA	TRUE	present	deletion	uncallable	pfhrp2+/pfhrp3-	ERR1818154	13-11++	92.4632	FALSE
Colombia	NA	NA	PW0044-C	NA	South America - North	South America	S_AMERICA	TRUE	present	deletion	uncallable	pfhrp2+/pfhrp3-	ERR1818155	13-11++	238.575	FALSE
Colombia	NA	NA	PW0045-C	NA	South America - North	South America	S_AMERICA	TRUE	present	deletion	uncallable	pfhrp2+/pfhrp3-	ERR1818156	13-11++	227.424	FALSE
Colombia	NA	NA	PW0046-C	NA	South America - North	South America	S_AMERICA	TRUE	present	deletion	uncallable	pfhrp2+/pfhrp3-	ERR1818157	13-11++	259.404	FALSE
Colombia	NA	NA	PW0047-C	NA	South America - North	South America	S_AMERICA	TRUE	present	deletion	uncallable	pfhrp2+/pfhrp3-	ERR1818158	13-11++	257.402	FALSE
Colombia	NA	NA	PW0048-C	NA	South America - North	South America	S_AMERICA	TRUE	present	deletion	uncallable	pfhrp2+/pfhrp3-	ERR1818159	13-11++	261.421	FALSE
Colombia	NA	NA	PW0049-C	NA	South America - North	South America	S_AMERICA	TRUE	present	deletion	uncallable	pfhrp2+/pfhrp3-	ERR1818160	13-11++	174.825	FALSE
Colombia	Cauca	2015	PW0050-C	NA	South America - North	South America	S_AMERICA	TRUE	present	deletion	uncallable	pfhrp2+/pfhrp3-	ERR1818161	13-11++	134.306	FALSE
Colombia	NA	NA	PW0052-C	NA	South America - North	South America	S_AMERICA	TRUE	present	deletion	uncallable	pfhrp2+/pfhrp3-	ERR1818163	13-11++	257.655	FALSE
Colombia	NA	NA	PW0053-C	NA	South America - North	South America	S_AMERICA	TRUE	present	deletion	uncallable	pfhrp2+/pfhrp3-	ERR1818164	13-11++	304.193	FALSE
Colombia	NA	NA	PW0054-C	NA	South America - North	South America	S_AMERICA	TRUE	present	deletion	uncallable	pfhrp2+/pfhrp3-	ERR1818165	13-11++	282.585	FALSE
Colombia	NA	NA	PW0055-C	NA	South America - North	South America	S_AMERICA	TRUE	present	deletion	uncallable	pfhrp2+/pfhrp3-	ERR1818166	13-11++	303.615	FALSE
Colombia	NA	NA	PW0056-C	NA	South America - North	South America	S_AMERICA	TRUE	present	deletion	uncallable	pfhrp2+/pfhrp3-	ERR1818167	13-11++	268.206	FALSE
Colombia	NA	NA	PW0057-C	NA	South America - North	South America	S_AMERICA	TRUE	present	deletion	uncallable	pfhrp2+/pfhrp3-	ERR1818168	13-11++	293.195	FALSE
Colombia	NA	NA	PW0057-Cx	NA	South America - North	South America	S_AMERICA	TRUE	present	deletion	uncallable	pfhrp2+/pfhrp3-	ERR1911239	13-11++	169.813	FALSE
Colombia	NA	NA	PW0058-C	NA	South America - North	South America	S_AMERICA	TRUE	present	present	deletion	pfhrp2+/pfhrp3+	ERR1818169	11-TARE1	187.277	FALSE
Colombia	NA	NA	PW0059-C	NA	South America - North	South America	S_AMERICA	TRUE	present	deletion	uncallable	pfhrp2+/pfhrp3-	ERR1818170	13-11++	47.6118	FALSE
Colombia	NA	NA	PW0060-C	NA	South America - North	South America	S_AMERICA	TRUE	present	deletion	uncallable	pfhrp2+/pfhrp3-	ERR1818171	13-11++	285.887	FALSE
Colombia	NA	NA	PW0062-C	NA	South America - North	South America	S_AMERICA	TRUE	present	deletion	uncallable	pfhrp2+/pfhrp3-	ERR1818173	13-11++	124.424	FALSE
Colombia	NA	NA	PW0063-C	NA	South America - North	South America	S_AMERICA	TRUE	present	deletion	uncallable	pfhrp2+/pfhrp3-	ERR1818174	13-11++	129.957	FALSE
Colombia	NA	NA	PW0064-C	NA	South America - North	South America	S_AMERICA	TRUE	present	deletion	uncallable	pfhrp2+/pfhrp3-	ERR1818175	13-11++	271.854	FALSE
Colombia	NA	NA	PW0067-C	NA	South America - North	South America	S_AMERICA	TRUE	present	deletion	deletion	pfhrp2+/pfhrp3-	ERR1818178	13-11++	271.366	FALSE
Colombia	NA	NA	PW0069-C	NA	South America - North	South America	S_AMERICA	TRUE	present	present	deletion	pfhrp2+/pfhrp3+	ERR1818180	11-TARE1	246.987	FALSE
Colombia	NA	NA	PW0070-C	NA	South America - North	South America	S_AMERICA	TRUE	present	present	deletion	pfhrp2+/pfhrp3+	ERR1818181	11-TARE1	265.34	FALSE
Colombia	NA	NA	PW0076-C	NA	South America - North	South America	S_AMERICA	TRUE	present	deletion	uncallable	pfhrp2+/pfhrp3-	ERR1911237	13-11++	268.56	FALSE
Colombia	NA	NA	PW0080-C	NA	South America - North	South America	S_AMERICA	TRUE	present	deletion	deletion	pfhrp2+/pfhrp3-	ERR1911242	13-11++	82.7104	FALSE
Colombia	NA	NA	PW0085-C	NA	South America - North	South America	S_AMERICA	TRUE	present	deletion	uncallable	pfhrp2+/pfhrp3-	ERR1911247	13-11++	121.812	FALSE
Colombia	NA	NA	PW0088-C	NA	South America - North	South America	S_AMERICA	TRUE	present	deletion	uncallable	pfhrp2+/pfhrp3-	ERR1911250	13-11++	230.276	FALSE
Colombia	NA	NA	PW0091-C	NA	South America - North	South America	S_AMERICA	TRUE	present	present	deletion	pfhrp2+/pfhrp3+	ERR1911253	11-TARE1	168.89	FALSE
Colombia	NA	NA	PW0093-C	NA	South America - North	South America	S_AMERICA	TRUE	present	deletion	uncallable	pfhrp2+/pfhrp3-	ERR1911255	13-11++	68.6885	FALSE
Colombia	NA	NA	PW0097-C	NA	South America - North	South America	S_AMERICA	TRUE	present	deletion	uncallable	pfhrp2+/pfhrp3-	ERR1911259	13-11++	290.224	FALSE
Colombia	NA	NA	PW0104-C	NA	South America - North	South America	S_AMERICA	TRUE	present	present	deletion	pfhrp2+/pfhrp3+	ERR1911266	11-TARE1	29.9306	FALSE
Colombia	NA	NA	PW0105-C	NA	South America - North	South America	S_AMERICA	TRUE	present	deletion	uncallable	pfhrp2+/pfhrp3-	ERR1911267	13-11++	302.252	FALSE
Colombia	NA	NA	PW0106-C	NA	South America - North	South America	S_AMERICA	TRUE	present	present	deletion	pfhrp2+/pfhrp3+	ERR1911268	11-TARE1	267.31	FALSE
Laos	LabIsolate	NA	DD2	NA	South East Asia - East	Oceania-SEA	ASIA	FALSE	deletion	present	uncallable	pfhrp2-/pfhrp3+	ERR1008806	NA	48.04	FALSE
Honduras	LabIsolate	1980	HB3	NA	South America - North	South America	S_AMERICA	FALSE	present	deletion	uncallable	pfhrp2+/pfhrp3-	ERR1008805	13-11++	33.5419	FALSE
Sudan	LabIsolate	NA	SD01	NA	East Africa	East Africa	AFRICA	FALSE	present	deletion	uncallable	pfhrp2+/pfhrp3-	ERR1015544,ERR1024468	13-11++	56.6662	FALSE
Myanmar	Kawthaung	2011	QC0121-C	NA	South East Asia - West	Oceania-SEA	ASIA	TRUE	present	present	deletion	pfhrp2+/pfhrp3+	ERR126502	11-TARE1	171.419	FALSE
Laos	Xepon	2010	QE0360-C	NA	South East Asia - East	Oceania-SEA	ASIA	TRUE	present	present	deletion	pfhrp2+/pfhrp3+	ERR126431	11-TARE1	41.2608	FALSE
Laos	Xepon	2010	QE0369-C	NA	South East Asia - East	Oceania-SEA	ASIA	TRUE	present	present	deletion	pfhrp2+/pfhrp3+	ERR126404	11-TARE1	138.95	FALSE
Laos	Attapeu	2011	QE0418-C	NA	South East Asia - East	Oceania-SEA	ASIA	TRUE	present	present	deletion	pfhrp2+/pfhrp3+	ERR223056	11-TARE1	111.674	FALSE
Laos	Attapeu	2011	QE0424-C	NA	South East Asia - East	Oceania-SEA	ASIA	TRUE	present	present	deletion	pfhrp2+/pfhrp3+	ERR223061	11-TARE1	102.144	FALSE
Laos	Attapeu	2011	QE0439-C	NA	South East Asia - East	Oceania-SEA	ASIA	TRUE	present	present	deletion	pfhrp2+/pfhrp3+	ERR223082	11-TARE1	147.279	FALSE
Laos	Attapeu	2012	QE0455-C	NA	South East Asia - East	Oceania-SEA	ASIA	TRUE	present	deletion	uncallable	pfhrp2+/pfhrp3-	ERR216573	13-TARE1	83.0838	FALSE
Ethiopia	West Arsi Zone	2013	QS0104-C	NA	East Africa	East Africa	AFRICA	TRUE	present	deletion	uncallable	pfhrp2+/pfhrp3-	ERR1035536	13-11++	131.821	FALSE
Ethiopia	West Arsi Zone	2013	QS0110-C	NA	East Africa	East Africa	AFRICA	TRUE	present	deletion	uncallable	pfhrp2+/pfhrp3-	ERR1045267	13-11++	319.628	FALSE
Ethiopia	West Arsi Zone	2013	QS0144-C	NA	East Africa	East Africa	AFRICA	TRUE	present	deletion	uncallable	pfhrp2+/pfhrp3-	ERR1045295	13-11++	131.948	FALSE
Ethiopia	Shewa Robit Town Health Centre	2015	QS0154-C	NA	East Africa	East Africa	AFRICA	TRUE	present	deletion	uncallable	pfhrp2+/pfhrp3-	ERR1106575	13-11++	135.676	FALSE
Ethiopia	Shewa Robit Town Health Centre	2015	QS0155-C	NA	East Africa	East Africa	AFRICA	TRUE	present	deletion	uncallable	pfhrp2+/pfhrp3-	ERR1106606	13-11++	61.934	FALSE
Ethiopia	Shewa Robit Town Health Centre	2015	QS0156-C	NA	East Africa	East Africa	AFRICA	TRUE	present	deletion	uncallable	pfhrp2+/pfhrp3-	ERR1106576	13-11++	100.01	FALSE
Ethiopia	Shewa Robit Town Health Centre	2015	QS0157-C	NA	East Africa	East Africa	AFRICA	TRUE	present	deletion	uncallable	pfhrp2+/pfhrp3-	ERR1106577	13-11++	111.022	FALSE
Ethiopia	Shewa Robit Town Health Centre	2015	QS0163-C	NA	East Africa	East Africa	AFRICA	TRUE	present	deletion	uncallable	pfhrp2+/pfhrp3-	ERR1106582	13-11++	76.9515	FALSE
Ethiopia	Shewa Robit Town Health Centre	2015	QS0166-C	NA	East Africa	East Africa	AFRICA	TRUE	present	deletion	uncallable	pfhrp2+/pfhrp3-	ERR1106584	13-11++	10.4309	FALSE
Ethiopia	Shewa Robit Town Health Centre	2015	QS0168-C	NA	East Africa	East Africa	AFRICA	TRUE	present	deletion	uncallable	pfhrp2+/pfhrp3-	ERR1106586	13-11++	100.976	FALSE
Senegal	Pikine	2013	QV0020-C	NA	West Africa	West Africa	AFRICA	TRUE	present	deletion	uncallable	pfhrp2+/pfhrp3-	ERR912907	13-11++	194.432	FALSE
Senegal	Pikine	2013	QV0021-C	NA	West Africa	West Africa	AFRICA	TRUE	present	deletion	uncallable	pfhrp2+/pfhrp3-	ERR912908	13-11++	75.2632	FALSE
Senegal	Pikine	2013	QV0040-C	NA	West Africa	West Africa	AFRICA	TRUE	present	deletion	uncallable	pfhrp2+/pfhrp3-	ERR912921	13-11++	127.66	FALSE
Senegal	Pikine	2013	QV0071-C	NA	West Africa	West Africa	AFRICA	TRUE	present	deletion	uncallable	pfhrp2+/pfhrp3-	ERR948829	13-11++	163.98	FALSE
Senegal	Pikine	2013	QV0072-C	NA	West Africa	West Africa	AFRICA	TRUE	present	deletion	uncallable	pfhrp2+/pfhrp3-	ERR948806	13-11++	93.9157	FALSE
Senegal	Pikine	2014	QV0094-C	NA	West Africa	West Africa	AFRICA	TRUE	present	deletion	uncallable	pfhrp2+/pfhrp3-	ERR1081176	13-11++	171.266	FALSE
Bangladesh	Chittagong	2015	RCN00724	NA	South Asia	Oceania-SEA	ASIA	TRUE	deletion	present	uncallable	pfhrp2-/pfhrp3+	ERR2542477	NA	79.2144	FALSE
Vietnam	Binh Phuoc	2015	RCN01778	NA	South East Asia - East	Oceania-SEA	ASIA	TRUE	present	deletion	uncallable	pfhrp2+/pfhrp3-	ERR2933309	13-11++	66.6212	FALSE
Laos	Salavan	2017	RCN09056	NA	South East Asia - East	Oceania-SEA	ASIA	TRUE	present	deletion	uncallable	pfhrp2+/pfhrp3-	ERR2889670	13-11++	52.6334	FALSE
Laos	Salavan	2017	RCN09057	NA	South East Asia - East	Oceania-SEA	ASIA	TRUE	present	deletion	uncallable	pfhrp2+/pfhrp3-	ERR2591060	13-11++	52.6334	FALSE
Myanmar	Kayin	2016	RCN10003	NA	South East Asia - West	Oceania-SEA	ASIA	TRUE	present	deletion	uncallable	pfhrp2+/pfhrp3-	ERR3448477	13-11++	65.1783	FALSE
Sudan	Kassala	2015	SPT00901	NA	East Africa	East Africa	AFRICA	TRUE	present	deletion	uncallable	pfhrp2+/pfhrp3-	ERR2299574	13-11++	46.6797	FALSE
Ghana	Greater Accra	2016	SPT15175	NA	West Africa	West Africa	AFRICA	TRUE	present	deletion	uncallable	pfhrp2+/pfhrp3-	ERR2274766	13-11++	53.8817	FALSE
Colombia	NA	NA	SPT26228	NA	South America - North	South America	S_AMERICA	TRUE	present	deletion	uncallable	pfhrp2+/pfhrp3-	ERR2496571	13-11++	369.547	FALSE
Colombia	NA	NA	SPT26248	NA	South America - North	South America	S_AMERICA	TRUE	present	deletion	uncallable	pfhrp2+/pfhrp3-	ERR2496548	13-11++	370.438	FALSE
Colombia	NA	NA	SPT26282	NA	South America - North	South America	S_AMERICA	TRUE	present	deletion	uncallable	pfhrp2+/pfhrp3-	ERR2496614	13-11++	233.748	FALSE
Colombia	NA	NA	SPT26289	NA	South America - North	South America	S_AMERICA	TRUE	present	deletion	uncallable	pfhrp2+/pfhrp3-	ERR2496554	13-11++	82.3589	FALSE
Colombia	NA	NA	SPT26294	NA	South America - North	South America	S_AMERICA	TRUE	present	deletion	uncallable	pfhrp2+/pfhrp3-	ERR2496618	13-11++	192.445	FALSE
Colombia	NA	NA	SPT26295	NA	South America - North	South America	S_AMERICA	TRUE	present	deletion	uncallable	pfhrp2+/pfhrp3-	ERR2496555	13-11++	158.04	FALSE
Colombia	NA	NA	SPT26302	NA	South America - North	South America	S_AMERICA	TRUE	present	deletion	uncallable	pfhrp2+/pfhrp3-	ERR2496582	13-11++	383.811	FALSE
Colombia	NA	NA	SPT26305	NA	South America - North	South America	S_AMERICA	TRUE	present	deletion	uncallable	pfhrp2+/pfhrp3-	ERR2496559	13-11++	138.177	FALSE
Colombia	NA	NA	SPT26307	NA	South America - North	South America	S_AMERICA	TRUE	present	deletion	uncallable	pfhrp2+/pfhrp3-	ERR2496619	13-11++	144.454	FALSE
Colombia	NA	NA	SPT26329	NA	South America - North	South America	S_AMERICA	TRUE	present	deletion	uncallable	pfhrp2+/pfhrp3-	ERR2496565	13-11++	348.476	FALSE
Colombia	NA	NA	SPT26331	NA	South America - North	South America	S_AMERICA	TRUE	present	deletion	uncallable	pfhrp2+/pfhrp3-	ERR2496566	13-11++	315.75	FALSE
Colombia	NA	NA	SPT26343	NA	South America - North	South America	S_AMERICA	TRUE	present	deletion	uncallable	pfhrp2+/pfhrp3-	ERR2496596	13-11++	337.365	FALSE
Colombia	NA	NA	SPT26345	NA	South America - North	South America	S_AMERICA	TRUE	present	deletion	uncallable	pfhrp2+/pfhrp3-	ERR2496625	13-11++	188.093	FALSE
Mali	Kayes	2015	SPT26429	NA	West Africa	West Africa	AFRICA	TRUE	present	deletion	uncallable	pfhrp2+/pfhrp3-	ERR2591268	13-11++	107.798	FALSE
Ghana	Upper East	2017	SPT34382	NA	West Africa	West Africa	AFRICA	TRUE	present	deletion	uncallable	pfhrp2+/pfhrp3-	ERR3608734	13-11++	67.0085	FALSE
The Gambia	Western	2015	SPT35264	NA	West Africa	West Africa	AFRICA	TRUE	present	deletion	uncallable	pfhrp2+/pfhrp3-	ERR2892867	13-11++	57.9736	FALSE
The Gambia	Western	2015	SPT35286	NA	West Africa	West Africa	AFRICA	TRUE	present	deletion	uncallable	pfhrp2+/pfhrp3-	ERR2892753	13-11++	67.832	FALSE
The Gambia	Western	2015	SPT35290	NA	West Africa	West Africa	AFRICA	TRUE	present	deletion	uncallable	pfhrp2+/pfhrp3-	ERR2892635	13-11++	70.4486	FALSE
The Gambia	Upper River	2014	SPT35336	NA	West Africa	West Africa	AFRICA	TRUE	present	deletion	uncallable	pfhrp2+/pfhrp3-	ERR2892995	13-11++	57.7712	FALSE
The Gambia	Upper River	2014	SPT35384	NA	West Africa	West Africa	AFRICA	TRUE	present	deletion	uncallable	pfhrp2+/pfhrp3-	ERR2893006	13-11++	63.181	FALSE
El Salvador	LabIsolate	NA	Santa-Lucia-Salvador-I	NA	South America - North	South America	S_AMERICA	FALSE	present	deletion	uncallable	pfhrp2+/pfhrp3-	SRR629043,SRR629056	13-11++	33.9444	FALSE
Ethiopia	NA	2017	X3098DT	NA	East Africa	East Africa	AFRICA	TRUE	deletion	deletion	uncallable	pfhrp2-/pfhrp3-	SRR15000254	13-11++	133.858	FALSE
Ethiopia	NA	2017	X3105DT	NA	East Africa	East Africa	AFRICA	TRUE	deletion	deletion	uncallable	pfhrp2-/pfhrp3-	SRR15000246	13-11++	99.4605	FALSE
Ethiopia	NA	2017	X3111DT	NA	East Africa	East Africa	AFRICA	TRUE	deletion	deletion	uncallable	pfhrp2-/pfhrp3-	SRR15000244	13-11++	121.56	FALSE
Ethiopia	NA	2017	X3113DT	NA	East Africa	East Africa	AFRICA	TRUE	deletion	deletion	uncallable	pfhrp2-/pfhrp3-	SRR15000249	13-11++	219.84	FALSE
Ethiopia	NA	2017	X3194DT	NA	East Africa	East Africa	AFRICA	TRUE	deletion	deletion	uncallable	pfhrp2-/pfhrp3-	SRR15000243	13-11++	120.023	FALSE
Ethiopia	NA	2017	X4642DT	NA	East Africa	East Africa	AFRICA	TRUE	deletion	deletion	uncallable	pfhrp2-/pfhrp3-	SRR15000257	13-11++	169.708	FALSE
Ethiopia	NA	2017	XX2454A	NA	East Africa	East Africa	AFRICA	TRUE	deletion	deletion	uncallable	pfhrp2-/pfhrp3-	SRR15000255	13-11++	99.3909	FALSE
Ethiopia	NA	2017	XX2458A	NA	East Africa	East Africa	AFRICA	TRUE	deletion	deletion	uncallable	pfhrp2-/pfhrp3-	SRR15000262	13-11++	146.744	FALSE
Ethiopia	NA	2017	XX2463A	NA	East Africa	East Africa	AFRICA	TRUE	deletion	deletion	uncallable	pfhrp2-/pfhrp3-	SRR15000251	13-11++	107.462	FALSE
Ethiopia	NA	2017	XX3810A	NA	East Africa	East Africa	AFRICA	TRUE	deletion	deletion	uncallable	pfhrp2-/pfhrp3-	SRR15000242	13-11++	138.94	FALSE
Ethiopia	NA	2017	XX4610T	NA	East Africa	East Africa	AFRICA	TRUE	deletion	deletion	uncallable	pfhrp2-/pfhrp3-	SRR15000261	13-11++	149.39	FALSE
Ethiopia	NA	2017	XX4641A	NA	East Africa	East Africa	AFRICA	TRUE	deletion	deletion	uncallable	pfhrp2-/pfhrp3-	SRR15000258	13-11++	136.065	FALSE
Papua New Guinea	LabIsolate	NA	D10	NA	Papua New Guinea	Oceania-SEA	OCEANIA	FALSE	deletion	present	uncallable	pfhrp2-/pfhrp3+	NA	NA	556.153	FALSE
Cambodia	LabIsolate	NA	FCR3	NA	South East Asia - East	Oceania-SEA	ASIA	FALSE	present	present	deletion	pfhrp2+/pfhrp3+	NA	NA	839.829	FALSE
Colombia	NA	NA	SPT26227	NA	South America - North	South America	S_AMERICA	TRUE	present	present	present	pfhrp2+/pfhrp3+	ERR2496598	NA	321.657	FALSE
Colombia	NA	NA	SPT26234	NA	South America - North	South America	S_AMERICA	TRUE	present	present	present	pfhrp2+/pfhrp3+	ERR2496573	NA	205.888	FALSE
Colombia	NA	NA	SPT26237	NA	South America - North	South America	S_AMERICA	TRUE	present	present	present	pfhrp2+/pfhrp3+	ERR2496574	NA	368.594	FALSE
Colombia	NA	NA	SPT26240	NA	South America - North	South America	S_AMERICA	TRUE	present	present	present	pfhrp2+/pfhrp3+	ERR2496575	NA	186.389	FALSE
Colombia	NA	NA	SPT26242	NA	South America - North	South America	S_AMERICA	TRUE	present	present	present	pfhrp2+/pfhrp3+	ERR2496576	NA	248.577	FALSE
Colombia	NA	NA	SPT26243	NA	South America - North	South America	S_AMERICA	TRUE	present	present	present	pfhrp2+/pfhrp3+	ERR2496577	NA	201.662	FALSE
Colombia	NA	NA	SPT26256	NA	South America - North	South America	S_AMERICA	TRUE	present	present	present	pfhrp2+/pfhrp3+	ERR2496603	NA	192.605	FALSE
Colombia	NA	NA	SPT26260	NA	South America - North	South America	S_AMERICA	TRUE	present	present	present	pfhrp2+/pfhrp3+	ERR2496605	NA	259.854	FALSE
Colombia	NA	NA	SPT26262	NA	South America - North	South America	S_AMERICA	TRUE	present	present	present	pfhrp2+/pfhrp3+	ERR2496606	NA	400.152	FALSE
Colombia	NA	NA	SPT26270	NA	South America - North	South America	S_AMERICA	TRUE	uncallable	uncallable	uncallable	uncallable	ERR2496610	NA	33.0531	TRUE
Colombia	NA	NA	SPT26273	NA	South America - North	South America	S_AMERICA	TRUE	present	present	present	pfhrp2+/pfhrp3+	ERR2496578	NA	323.322	FALSE
Colombia	NA	NA	SPT26288	NA	South America - North	South America	S_AMERICA	TRUE	present	present	present	pfhrp2+/pfhrp3+	ERR2496616	NA	44.3491	FALSE
Colombia	Cauca	2016	SPT26325	NA	South America - North	South America	S_AMERICA	TRUE	uncallable	uncallable	uncallable	uncallable	ERR2496591	NA	8.99912	TRUE
Colombia	Cauca	2016	SPT26326	NA	South America - North	South America	S_AMERICA	TRUE	uncallable	uncallable	uncallable	uncallable	ERR2496564	NA	16.2646	TRUE
Vietnam	Binh Phuoc	2017	RCN08126	NA	South East Asia - East	Oceania-SEA	ASIA	TRUE	present	present	present	pfhrp2+/pfhrp3+	ERR2363961	NA	69.4038	FALSE
Cambodia	Pailin	2017	RCN12616	NA	South East Asia - East	Oceania-SEA	ASIA	TRUE	present	present	present	pfhrp2+/pfhrp3+	ERR2863197	NA	48.5501	FALSE
Cambodia	Pailin	2017	RCN12618	NA	South East Asia - East	Oceania-SEA	ASIA	TRUE	uncallable	uncallable	uncallable	uncallable	ERR2863193	NA	18.6062	TRUE
Cambodia	Pailin	2017	RCN12620	NA	South East Asia - East	Oceania-SEA	ASIA	TRUE	present	present	present	pfhrp2+/pfhrp3+	ERR2863120	NA	114.828	FALSE
Colombia	Cauca	2016	PW0066-C	NA	South America - North	South America	S_AMERICA	TRUE	present	present	present	pfhrp2+/pfhrp3+	ERR1818177	NA	39.4495	FALSE
Colombia	NA	NA	PW0071-C	NA	South America - North	South America	S_AMERICA	TRUE	present	present	present	pfhrp2+/pfhrp3+	ERR1818182	NA	64.9417	FALSE
Colombia	NA	NA	PW0073-C	NA	South America - North	South America	S_AMERICA	TRUE	present	present	present	pfhrp2+/pfhrp3+	ERR1818184	NA	245.504	FALSE
Colombia	NA	NA	PW0074-C	NA	South America - North	South America	S_AMERICA	TRUE	present	present	present	pfhrp2+/pfhrp3+	ERR1818185	NA	159.332	FALSE
Colombia	NA	NA	PW0075-C	NA	South America - North	South America	S_AMERICA	TRUE	present	present	present	pfhrp2+/pfhrp3+	ERR1911236	NA	125.677	FALSE
Colombia	NA	NA	PW0077-C	NA	South America - North	South America	S_AMERICA	TRUE	present	present	present	pfhrp2+/pfhrp3+	ERR1911238	NA	158.508	FALSE
Colombia	Cauca	2016	PW0078-C	NA	South America - North	South America	S_AMERICA	TRUE	present	present	present	pfhrp2+/pfhrp3+	ERR1911240	NA	119.618	FALSE
Colombia	NA	NA	PW0079-C	NA	South America - North	South America	S_AMERICA	TRUE	present	present	present	pfhrp2+/pfhrp3+	ERR1911241	NA	169.223	FALSE
Colombia	NA	NA	PW0083-C	NA	South America - North	South America	S_AMERICA	TRUE	present	present	present	pfhrp2+/pfhrp3+	ERR1911245	NA	169.193	FALSE
Colombia	NA	NA	PW0086-C	NA	South America - North	South America	S_AMERICA	TRUE	present	present	present	pfhrp2+/pfhrp3+	ERR1911248	NA	302.07	FALSE
Colombia	NA	NA	PW0089-C	NA	South America - North	South America	S_AMERICA	TRUE	present	present	present	pfhrp2+/pfhrp3+	ERR1911251	NA	103.778	FALSE
Colombia	NA	NA	PW0092-C	NA	South America - North	South America	S_AMERICA	TRUE	present	present	present	pfhrp2+/pfhrp3+	ERR1911254	NA	307.376	FALSE
Colombia	Cauca	2015	PW0094-C	NA	South America - North	South America	S_AMERICA	TRUE	present	present	present	pfhrp2+/pfhrp3+	ERR1911256	NA	15.0376	FALSE
Colombia	NA	NA	PW0098-C	NA	South America - North	South America	S_AMERICA	TRUE	present	present	present	pfhrp2+/pfhrp3+	ERR1911260	NA	26.7321	FALSE
Colombia	NA	NA	PW0099-C	NA	South America - North	South America	S_AMERICA	TRUE	uncallable	uncallable	uncallable	uncallable	ERR1911261	NA	42.541	TRUE
Colombia	NA	NA	PW0100-C	NA	South America - North	South America	S_AMERICA	TRUE	present	present	present	pfhrp2+/pfhrp3+	ERR1911262	NA	54.1755	FALSE
Colombia	NA	NA	PW0101-C	NA	South America - North	South America	S_AMERICA	TRUE	present	present	present	pfhrp2+/pfhrp3+	ERR1911263	NA	345.179	FALSE
Colombia	NA	NA	PW0102-C	NA	South America - North	South America	S_AMERICA	TRUE	present	present	present	pfhrp2+/pfhrp3+	ERR1911264	NA	285.847	FALSE
Colombia	NA	NA	SPT26230	NA	South America - North	South America	S_AMERICA	TRUE	present	present	present	pfhrp2+/pfhrp3+	ERR2496543	NA	103.822	FALSE
Colombia	NA	NA	SPT26232	NA	South America - North	South America	S_AMERICA	TRUE	present	present	present	pfhrp2+/pfhrp3+	ERR2496544	NA	348.761	FALSE
Colombia	NA	NA	SPT26233	NA	South America - North	South America	S_AMERICA	TRUE	present	present	present	pfhrp2+/pfhrp3+	ERR2496599	NA	94.4179	FALSE
Colombia	NA	NA	SPT26235	NA	South America - North	South America	S_AMERICA	TRUE	present	present	present	pfhrp2+/pfhrp3+	ERR2496600	NA	228.508	FALSE
Colombia	NA	NA	SPT26238	NA	South America - North	South America	S_AMERICA	TRUE	present	present	present	pfhrp2+/pfhrp3+	ERR2496545	NA	220.205	FALSE
Colombia	NA	NA	SPT26265	NA	South America - North	South America	S_AMERICA	TRUE	present	present	present	pfhrp2+/pfhrp3+	ERR2496549	NA	351.01	FALSE
Colombia	NA	NA	SPT26266	NA	South America - North	South America	S_AMERICA	TRUE	present	present	present	pfhrp2+/pfhrp3+	ERR2496608	NA	328.847	FALSE
Colombia	NA	NA	SPT26269	NA	South America - North	South America	S_AMERICA	TRUE	present	present	present	pfhrp2+/pfhrp3+	ERR2496609	NA	301.098	FALSE
Colombia	NA	NA	SPT26274	NA	South America - North	South America	S_AMERICA	TRUE	present	present	present	pfhrp2+/pfhrp3+	ERR2496551	NA	379.221	FALSE
Colombia	NA	NA	SPT26275	NA	South America - North	South America	S_AMERICA	TRUE	present	present	present	pfhrp2+/pfhrp3+	ERR2496579	NA	310.876	FALSE
Colombia	NA	NA	SPT26276	NA	South America - North	South America	S_AMERICA	TRUE	present	present	present	pfhrp2+/pfhrp3+	ERR2496552	NA	382.277	FALSE
Colombia	NA	NA	SPT26278	NA	South America - North	South America	S_AMERICA	TRUE	present	present	present	pfhrp2+/pfhrp3+	ERR2496612	NA	150.394	FALSE
Colombia	NA	NA	SPT26281	NA	South America - North	South America	S_AMERICA	TRUE	present	present	present	pfhrp2+/pfhrp3+	ERR2496613	NA	68.6971	FALSE
Colombia	NA	NA	SPT26283	NA	South America - North	South America	S_AMERICA	TRUE	present	present	present	pfhrp2+/pfhrp3+	ERR2496615	NA	259.66	FALSE
Colombia	NA	NA	SPT26286	NA	South America - North	South America	S_AMERICA	TRUE	present	present	present	pfhrp2+/pfhrp3+	ERR2496553	NA	70.7947	FALSE
Colombia	NA	NA	SPT26290	NA	South America - North	South America	S_AMERICA	TRUE	present	present	present	pfhrp2+/pfhrp3+	ERR2496580	NA	169.719	FALSE
Colombia	NA	NA	SPT26304	NA	South America - North	South America	S_AMERICA	TRUE	present	present	present	pfhrp2+/pfhrp3+	ERR2496558	NA	31.8808	FALSE
Colombia	NA	NA	SPT26319	NA	South America - North	South America	S_AMERICA	TRUE	uncallable	uncallable	uncallable	uncallable	ERR2496622	NA	25.649	TRUE
Colombia	NA	NA	SPT26322	NA	South America - North	South America	S_AMERICA	TRUE	present	present	present	pfhrp2+/pfhrp3+	ERR2496590	NA	206.809	FALSE
Colombia	NA	NA	SPT26324	NA	South America - North	South America	S_AMERICA	TRUE	present	present	present	pfhrp2+/pfhrp3+	ERR2496563	NA	28.88	FALSE
Colombia	NA	NA	SPT26327	NA	South America - North	South America	S_AMERICA	TRUE	present	present	present	pfhrp2+/pfhrp3+	ERR2496592	NA	37.7136	FALSE
Colombia	NA	NA	SPT26336	NA	South America - North	South America	S_AMERICA	TRUE	present	present	present	pfhrp2+/pfhrp3+	ERR2496568	NA	305.809	FALSE
Colombia	NA	NA	SPT26337	NA	South America - North	South America	S_AMERICA	TRUE	uncallable	uncallable	uncallable	uncallable	ERR2496594	NA	19.8986	TRUE
Colombia	NA	NA	SPT26338	NA	South America - North	South America	S_AMERICA	TRUE	present	present	present	pfhrp2+/pfhrp3+	ERR2496595	NA	105.32	FALSE
Colombia	NA	NA	SPT26339	NA	South America - North	South America	S_AMERICA	TRUE	present	present	present	pfhrp2+/pfhrp3+	ERR2496623	NA	325.799	FALSE
Colombia	NA	NA	SPT26340	NA	South America - North	South America	S_AMERICA	TRUE	present	present	present	pfhrp2+/pfhrp3+	ERR2496569	NA	108.962	FALSE
Colombia	NA	NA	SPT26341	NA	South America - North	South America	S_AMERICA	TRUE	present	present	present	pfhrp2+/pfhrp3+	ERR2496624	NA	152.34	FALSE
Colombia	NA	NA	SPT26342	NA	South America - North	South America	S_AMERICA	TRUE	uncallable	uncallable	uncallable	uncallable	ERR2496570	NA	40.2321	TRUE
Thailand	Sisakhet	2011	PD0500-C	NA	South East Asia - West	Oceania-SEA	ASIA	TRUE	present	present	present	pfhrp2+/pfhrp3+	ERR164693	NA	152.73	FALSE
Thailand	Sisakhet	2011	PD0501-C	NA	South East Asia - West	Oceania-SEA	ASIA	TRUE	present	present	present	pfhrp2+/pfhrp3+	ERR164710	NA	142.161	FALSE
Thailand	Sisakhet	2012	PD0651-C	2012-11-16	South East Asia - West	Oceania-SEA	ASIA	TRUE	present	present	present	pfhrp2+/pfhrp3+	ERR426036	NA	41.3935	FALSE
Cambodia	LabIsolate	NA	KH02	NA	South East Asia - East	Oceania-SEA	ASIA	FALSE	present	present	present	pfhrp2+/pfhrp3+	ERR980503	NA	35.3852	FALSE
Cambodia	Pursat	2010	PH0197-C	2010-08-17	South East Asia - East	Oceania-SEA	ASIA	TRUE	present	present	present	pfhrp2+/pfhrp3+	ERR022930	NA	177.915	FALSE
Cambodia	Pursat	2010	PH0253-C	NA	South East Asia - East	Oceania-SEA	ASIA	TRUE	present	present	present	pfhrp2+/pfhrp3+	ERR039987	NA	35.8207	FALSE
Cambodia	Pursat	2010	PH0481-C	NA	South East Asia - East	Oceania-SEA	ASIA	TRUE	present	present	present	pfhrp2+/pfhrp3+	ERR039875	NA	72.7476	FALSE
Peru	Iquitos, Loreto Province	2011	PP0014-C	NA	South America - Central	South America	S_AMERICA	TRUE	present	present	present	pfhrp2+/pfhrp3+	ERR123901	NA	88.501	FALSE
Peru	Iquitos, Loreto Province	2011	PP0015-C	NA	South America - Central	South America	S_AMERICA	TRUE	present	present	present	pfhrp2+/pfhrp3+	ERR123902	NA	56.6877	FALSE
Peru	Iquitos, Loreto Province	2011	PP0016-C	NA	South America - Central	South America	S_AMERICA	TRUE	present	present	present	pfhrp2+/pfhrp3+	ERR123903	NA	90.8991	FALSE
Cambodia	NA	2011	IGS-CBD-038	NA	South East Asia - East	Oceania-SEA	ASIA	TRUE	present	present	present	pfhrp2+/pfhrp3+	SRR5360391,SRR5360392	NA	29.8253	FALSE
Thailand	Mae Sot	2003	PD1470-C	NA	South East Asia - West	Oceania-SEA	ASIA	TRUE	present	present	present	pfhrp2+/pfhrp3+	ERR689419	NA	31.5153	FALSE
Tanzania	Nachingwea	2013	PE0454-C	NA	East Africa	East Africa	AFRICA	TRUE	present	present	present	pfhrp2+/pfhrp3+	ERR689158	NA	149.466	FALSE
Cambodia	Preah Vihear	2011	PH0611-C	2011-10-04	South East Asia - East	Oceania-SEA	ASIA	TRUE	present	present	present	pfhrp2+/pfhrp3+	ERR123866	NA	10.7403	FALSE
Uganda	LabIsolate	NA	2024-05-01	NA	East Africa	East Africa	AFRICA	FALSE	present	present	present	pfhrp2+/pfhrp3+	SRR647339	NA	86.8783	FALSE
India	NA	2012	5tbx	2012-08-01	South Asia	Oceania-SEA	ASIA	TRUE	present	present	present	pfhrp2+/pfhrp3+	SRR3575062	NA	525.042	FALSE
Cambodia	LabIsolate	NA	803-H2	NA	South East Asia - East	Oceania-SEA	ASIA	FALSE	uncallable	uncallable	uncallable	uncallable	SRR628956,SRR628976	NA	63.746	TRUE
Peru	Tumbes	2010	CDR20001	NA	South America - Central	South America	S_AMERICA	TRUE	uncallable	uncallable	uncallable	uncallable	ERR6226029	NA	NA	TRUE
Peru	Tumbes	2011	CDR20002	NA	South America - Central	South America	S_AMERICA	TRUE	uncallable	uncallable	uncallable	uncallable	ERR6226030	NA	NA	TRUE
Peru	Tumbes	2010	CDR20003	NA	South America - Central	South America	S_AMERICA	TRUE	uncallable	uncallable	uncallable	uncallable	ERR6226031	NA	NA	TRUE
Peru	Tumbes	2011	CDR20005	NA	South America - Central	South America	S_AMERICA	TRUE	uncallable	uncallable	uncallable	uncallable	ERR6226032	NA	NA	TRUE
Peru	Tumbes	2010	CDR20008	NA	South America - Central	South America	S_AMERICA	TRUE	uncallable	uncallable	uncallable	uncallable	ERR6226033	NA	NA	TRUE
Peru	Tumbes	2010	CDR20009	NA	South America - Central	South America	S_AMERICA	TRUE	uncallable	uncallable	uncallable	uncallable	ERR6226034	NA	NA	TRUE
Peru	Loreto	2006	CDR20010	NA	South America - Central	South America	S_AMERICA	TRUE	uncallable	uncallable	uncallable	uncallable	ERR6226035	NA	NA	TRUE
Peru	Loreto	2007	CDR20011	NA	South America - Central	South America	S_AMERICA	TRUE	uncallable	uncallable	uncallable	uncallable	ERR6226036	NA	NA	TRUE
Peru	Loreto	2010	CDR20012	NA	South America - Central	South America	S_AMERICA	TRUE	uncallable	uncallable	uncallable	uncallable	ERR6226037	NA	NA	TRUE
Peru	Loreto	2010	CDR20013	NA	South America - Central	South America	S_AMERICA	TRUE	uncallable	uncallable	uncallable	uncallable	ERR6226038	NA	NA	TRUE
Peru	Loreto	2014	CDR20014	NA	South America - Central	South America	S_AMERICA	TRUE	uncallable	uncallable	uncallable	uncallable	ERR6226039	NA	NA	TRUE
Thailand	Mae Ra Mat Hospital	2014	CKAF5210	2014-04-18	South East Asia - West	Oceania-SEA	ASIA	TRUE	present	present	present	pfhrp2+/pfhrp3+	SRR3743323	NA	47.7627	FALSE
Cambodia	LabIsolate	NA	CP803	NA	South East Asia - East	Oceania-SEA	ASIA	FALSE	present	present	present	pfhrp2+/pfhrp3+	SRR628947,SRR628996	NA	62.519	FALSE
Brazil	LabIsolate	NA	CS2	NA	South America - Central	South America	S_AMERICA	FALSE	present	present	present	pfhrp2+/pfhrp3+	ERR027115	NA	120.765	FALSE
Thailand	Maela	2014	DMA403	2014-01-06	South East Asia - West	Oceania-SEA	ASIA	TRUE	present	present	present	pfhrp2+/pfhrp3+	SRR3743303	NA	34.4154	FALSE
Papua New Guinea	NA	NA	DRS015A	NA	Papua New Guinea	Oceania-SEA	OCEANIA	TRUE	present	present	present	pfhrp2+/pfhrp3+	SRR1178857,SRR1178864	NA	107.888	FALSE
Papua New Guinea	NA	NA	DRS034	NA	Papua New Guinea	Oceania-SEA	OCEANIA	TRUE	present	present	present	pfhrp2+/pfhrp3+	SRR1178876,SRR1178878	NA	95.7058	FALSE
Mali	Bandiagara	2010	DaraEtAl2017-303-1	NA	West Africa	West Africa	AFRICA	TRUE	present	present	present	pfhrp2+/pfhrp3+	SRR1011158,SRR1011159,SRR1011160	NA	185.845	FALSE
Mali	Bandiagara	2010	DaraEtAl2017-309-1	NA	West Africa	West Africa	AFRICA	TRUE	present	present	present	pfhrp2+/pfhrp3+	SRR1011068,SRR1011069	NA	178.854	FALSE
Mali	Bandiagara	2010	DaraEtAl2017-318-1	NA	West Africa	West Africa	AFRICA	TRUE	present	present	present	pfhrp2+/pfhrp3+	SRR1011167,SRR1011168	NA	237.373	FALSE
Mali	Bandiagara	2010	DaraEtAl2017-326-1	NA	West Africa	West Africa	AFRICA	TRUE	present	present	present	pfhrp2+/pfhrp3+	SRR1011071,SRR1011072	NA	185.489	FALSE
Mali	Bandiagara	2010	DaraEtAl2017-327-1	NA	West Africa	West Africa	AFRICA	TRUE	present	present	present	pfhrp2+/pfhrp3+	SRR1210129,SRR1210130	NA	219.309	FALSE
Mali	Bandiagara	2010	DaraEtAl2017-365-1	NA	West Africa	West Africa	AFRICA	TRUE	present	present	present	pfhrp2+/pfhrp3+	SRR1011187,SRR1011188,SRR1011189	NA	103.126	FALSE
Mali	Bandiagara	2010	DaraEtAl2017-366-1	NA	West Africa	West Africa	AFRICA	TRUE	present	present	present	pfhrp2+/pfhrp3+	SRR1011205,SRR1011206,SRR1011207	NA	252.281	FALSE
Mali	Bandiagara	2010	DaraEtAl2017-377-1	NA	West Africa	West Africa	AFRICA	TRUE	present	present	present	pfhrp2+/pfhrp3+	SRR1011294,SRR1011295,SRR1011296	NA	223.256	FALSE
Mali	Bandiagara	2010	DaraEtAl2017-383-1	NA	West Africa	West Africa	AFRICA	TRUE	present	present	present	pfhrp2+/pfhrp3+	SRR1011287,SRR1011288,SRR1011289	NA	311.282	FALSE
Mali	Bandiagara	2010	DaraEtAl2017-397-1	NA	West Africa	West Africa	AFRICA	TRUE	present	present	present	pfhrp2+/pfhrp3+	SRR1209686,SRR1209687,SRR1209688	NA	153.572	FALSE
Mali	Bandiagara	2010	DaraEtAl2017-398-1	NA	West Africa	West Africa	AFRICA	TRUE	present	present	present	pfhrp2+/pfhrp3+	SRR1011353,SRR1011354,SRR1011355	NA	179.39	FALSE
Mali	Bandiagara	2010	DaraEtAl2017-58-1	NA	West Africa	West Africa	AFRICA	TRUE	present	present	present	pfhrp2+/pfhrp3+	SRR1011411,SRR1011412,SRR1011413	NA	153.181	FALSE
Mozambique	NA	NA	SPT52480	NA	South East Africa	East Africa	AFRICA	TRUE	uncallable	uncallable	uncallable	uncallable	ERR4661311	NA	95.6953	TRUE
Mozambique	NA	NA	SPT52476	NA	South East Africa	East Africa	AFRICA	TRUE	uncallable	uncallable	uncallable	uncallable	ERR4661312	NA	84.5144	TRUE
Mozambique	NA	NA	SPT52473	NA	South East Africa	East Africa	AFRICA	TRUE	uncallable	uncallable	uncallable	uncallable	ERR4661313	NA	94.7606	TRUE
Mozambique	NA	NA	SPT52477	NA	South East Africa	East Africa	AFRICA	TRUE	uncallable	uncallable	uncallable	uncallable	ERR4661314	NA	85.1323	TRUE
Mozambique	NA	NA	SPT52479	NA	South East Africa	East Africa	AFRICA	TRUE	uncallable	uncallable	uncallable	uncallable	ERR4661315	NA	39.1135	TRUE
Mozambique	NA	NA	SPT52474	NA	South East Africa	East Africa	AFRICA	TRUE	uncallable	uncallable	uncallable	uncallable	ERR4661316	NA	58.1122	TRUE
Mozambique	NA	NA	SPT52478	NA	South East Africa	East Africa	AFRICA	TRUE	uncallable	uncallable	uncallable	uncallable	ERR4661317	NA	84.7114	TRUE
Mozambique	NA	NA	SPT52475	NA	South East Africa	East Africa	AFRICA	TRUE	uncallable	uncallable	uncallable	uncallable	ERR4661318	NA	104.058	TRUE
Mozambique	NA	NA	SPT52419	NA	South East Africa	East Africa	AFRICA	TRUE	uncallable	uncallable	uncallable	uncallable	ERR4661319	NA	67.2831	TRUE
Mozambique	NA	NA	SPT52418	NA	South East Africa	East Africa	AFRICA	TRUE	uncallable	uncallable	uncallable	uncallable	ERR4661320	NA	111.753	TRUE
Mozambique	NA	NA	SPT52422	NA	South East Africa	East Africa	AFRICA	TRUE	uncallable	uncallable	uncallable	uncallable	ERR4661321	NA	90.3871	TRUE
Mozambique	NA	NA	SPT52420	NA	South East Africa	East Africa	AFRICA	TRUE	uncallable	uncallable	uncallable	uncallable	ERR4661322	NA	12.9261	TRUE
Mozambique	NA	NA	SPT52494	NA	South East Africa	East Africa	AFRICA	TRUE	uncallable	uncallable	uncallable	uncallable	ERR4661323	NA	14.9755	TRUE
Mozambique	NA	NA	SPT52493	NA	South East Africa	East Africa	AFRICA	TRUE	uncallable	uncallable	uncallable	uncallable	ERR4661324	NA	55.187	TRUE
Mozambique	NA	NA	SPT52490	NA	South East Africa	East Africa	AFRICA	TRUE	uncallable	uncallable	uncallable	uncallable	ERR4661325	NA	56.9245	TRUE
Mozambique	NA	NA	SPT52489	NA	South East Africa	East Africa	AFRICA	TRUE	uncallable	uncallable	uncallable	uncallable	ERR4661326	NA	70.7789	TRUE
Mozambique	NA	NA	SPT52455	NA	South East Africa	East Africa	AFRICA	TRUE	uncallable	uncallable	uncallable	uncallable	ERR4661327	NA	30.4646	TRUE
Mozambique	NA	NA	SPT52492	NA	South East Africa	East Africa	AFRICA	TRUE	uncallable	uncallable	uncallable	uncallable	ERR4661328	NA	36.5205	TRUE
Mozambique	NA	NA	SPT52456	NA	South East Africa	East Africa	AFRICA	TRUE	uncallable	uncallable	uncallable	uncallable	ERR4661329	NA	54.3678	TRUE
Mozambique	NA	NA	SPT52491	NA	South East Africa	East Africa	AFRICA	TRUE	uncallable	uncallable	uncallable	uncallable	ERR4661330	NA	61.2279	TRUE
Mozambique	NA	NA	SPT52404	NA	South East Africa	East Africa	AFRICA	TRUE	uncallable	uncallable	uncallable	uncallable	ERR4661331	NA	26.0046	TRUE
Mozambique	NA	NA	SPT52407	NA	South East Africa	East Africa	AFRICA	TRUE	uncallable	uncallable	uncallable	uncallable	ERR4661332	NA	16.1533	TRUE
Mozambique	NA	NA	SPT52402	NA	South East Africa	East Africa	AFRICA	TRUE	uncallable	uncallable	uncallable	uncallable	ERR4661333	NA	43.9578	TRUE
Mozambique	NA	NA	SPT50994	NA	South East Africa	East Africa	AFRICA	TRUE	uncallable	uncallable	uncallable	uncallable	ERR4661358	NA	53.217	TRUE
Mozambique	NA	NA	SPT51047	NA	South East Africa	East Africa	AFRICA	TRUE	uncallable	uncallable	uncallable	uncallable	ERR4661359	NA	22.0234	TRUE
Mozambique	NA	NA	SPT51046	NA	South East Africa	East Africa	AFRICA	TRUE	uncallable	uncallable	uncallable	uncallable	ERR4661360	NA	40.5195	TRUE
Mozambique	NA	NA	SPT51049	NA	South East Africa	East Africa	AFRICA	TRUE	uncallable	uncallable	uncallable	uncallable	ERR4661361	NA	89.3611	TRUE
Mozambique	NA	NA	SPT51051	NA	South East Africa	East Africa	AFRICA	TRUE	uncallable	uncallable	uncallable	uncallable	ERR4661362	NA	81.8909	TRUE
Mozambique	NA	NA	SPT51126	NA	South East Africa	East Africa	AFRICA	TRUE	uncallable	uncallable	uncallable	uncallable	ERR4661363	NA	8.53126	TRUE
Mozambique	NA	NA	SPT51075	NA	South East Africa	East Africa	AFRICA	TRUE	uncallable	uncallable	uncallable	uncallable	ERR4661364	NA	64.3671	TRUE
Mozambique	NA	NA	SPT51073	NA	South East Africa	East Africa	AFRICA	TRUE	uncallable	uncallable	uncallable	uncallable	ERR4661365	NA	9.3034	TRUE
Mozambique	NA	NA	SPT51071	NA	South East Africa	East Africa	AFRICA	TRUE	uncallable	uncallable	uncallable	uncallable	ERR4661366	NA	73.7042	TRUE
Mozambique	NA	NA	SPT51070	NA	South East Africa	East Africa	AFRICA	TRUE	uncallable	uncallable	uncallable	uncallable	ERR4661367	NA	59.5099	TRUE
Mozambique	NA	NA	SPT51108	NA	South East Africa	East Africa	AFRICA	TRUE	uncallable	uncallable	uncallable	uncallable	ERR4661368	NA	30.1694	TRUE
Mozambique	NA	NA	SPT51111	NA	South East Africa	East Africa	AFRICA	TRUE	uncallable	uncallable	uncallable	uncallable	ERR4661369	NA	31.8395	TRUE
Mozambique	NA	NA	SPT51109	NA	South East Africa	East Africa	AFRICA	TRUE	uncallable	uncallable	uncallable	uncallable	ERR4661370	NA	1.38561	TRUE
Mozambique	NA	NA	SPT51110	NA	South East Africa	East Africa	AFRICA	TRUE	uncallable	uncallable	uncallable	uncallable	ERR4661371	NA	50.0187	TRUE
Mozambique	NA	NA	SPT51065	NA	South East Africa	East Africa	AFRICA	TRUE	uncallable	uncallable	uncallable	uncallable	ERR4661372	NA	8.71807	TRUE
Mozambique	NA	NA	SPT51064	NA	South East Africa	East Africa	AFRICA	TRUE	uncallable	uncallable	uncallable	uncallable	ERR4661373	NA	5.24381	TRUE
Mozambique	NA	NA	SPT51063	NA	South East Africa	East Africa	AFRICA	TRUE	uncallable	uncallable	uncallable	uncallable	ERR4661374	NA	57.4924	TRUE
Mozambique	NA	NA	SPT51061	NA	South East Africa	East Africa	AFRICA	TRUE	uncallable	uncallable	uncallable	uncallable	ERR4661375	NA	30.5143	TRUE
Mozambique	NA	NA	SPT51060	NA	South East Africa	East Africa	AFRICA	TRUE	uncallable	uncallable	uncallable	uncallable	ERR4661376	NA	87.0989	TRUE
Mozambique	NA	NA	SPT51062	NA	South East Africa	East Africa	AFRICA	TRUE	uncallable	uncallable	uncallable	uncallable	ERR4661377	NA	63.7089	TRUE
Mozambique	NA	NA	SPT51096	NA	South East Africa	East Africa	AFRICA	TRUE	uncallable	uncallable	uncallable	uncallable	ERR4661378	NA	35.8572	TRUE
Mozambique	NA	NA	SPT51099	NA	South East Africa	East Africa	AFRICA	TRUE	uncallable	uncallable	uncallable	uncallable	ERR4661379	NA	8.3379	TRUE
Mozambique	NA	NA	SPT51094	NA	South East Africa	East Africa	AFRICA	TRUE	uncallable	uncallable	uncallable	uncallable	ERR4661380	NA	25.6902	TRUE
Mozambique	NA	NA	SPT51095	NA	South East Africa	East Africa	AFRICA	TRUE	uncallable	uncallable	uncallable	uncallable	ERR4661381	NA	133.378	TRUE
Mozambique	NA	NA	SPT53240	NA	South East Africa	East Africa	AFRICA	TRUE	uncallable	uncallable	uncallable	uncallable	ERR4661382	NA	14.5962	TRUE
Mozambique	NA	NA	SPT53232	NA	South East Africa	East Africa	AFRICA	TRUE	uncallable	uncallable	uncallable	uncallable	ERR4661383	NA	5.07021	TRUE
Mozambique	NA	NA	SPT53230	NA	South East Africa	East Africa	AFRICA	TRUE	uncallable	uncallable	uncallable	uncallable	ERR4661384	NA	57.2373	TRUE
Mozambique	NA	NA	SPT53229	NA	South East Africa	East Africa	AFRICA	TRUE	uncallable	uncallable	uncallable	uncallable	ERR4661385	NA	24.3894	TRUE
Mozambique	NA	NA	SPT53225	NA	South East Africa	East Africa	AFRICA	TRUE	uncallable	uncallable	uncallable	uncallable	ERR4661386	NA	8.50921	TRUE
Mozambique	NA	NA	SPT53228	NA	South East Africa	East Africa	AFRICA	TRUE	uncallable	uncallable	uncallable	uncallable	ERR4661387	NA	22.2541	TRUE
Mozambique	NA	NA	SPT53241	NA	South East Africa	East Africa	AFRICA	TRUE	uncallable	uncallable	uncallable	uncallable	ERR4661388	NA	8.30361	TRUE
Mozambique	NA	NA	SPT51036	NA	South East Africa	East Africa	AFRICA	TRUE	uncallable	uncallable	uncallable	uncallable	ERR4661389	NA	65.5649	TRUE
Mozambique	NA	NA	SPT51034	NA	South East Africa	East Africa	AFRICA	TRUE	uncallable	uncallable	uncallable	uncallable	ERR4661390	NA	81.4099	TRUE
Mozambique	NA	NA	SPT51035	NA	South East Africa	East Africa	AFRICA	TRUE	uncallable	uncallable	uncallable	uncallable	ERR4661391	NA	12.838	TRUE
Mozambique	NA	NA	SPT51030	NA	South East Africa	East Africa	AFRICA	TRUE	uncallable	uncallable	uncallable	uncallable	ERR4661392	NA	18.3016	TRUE
Mozambique	NA	NA	SPT50972	NA	South East Africa	East Africa	AFRICA	TRUE	uncallable	uncallable	uncallable	uncallable	ERR4661393	NA	71.9332	TRUE
Mozambique	NA	NA	SPT50973	NA	South East Africa	East Africa	AFRICA	TRUE	uncallable	uncallable	uncallable	uncallable	ERR4661394	NA	64.3975	TRUE
Mozambique	NA	NA	SPT50971	NA	South East Africa	East Africa	AFRICA	TRUE	uncallable	uncallable	uncallable	uncallable	ERR4661395	NA	37.0477	TRUE
Mozambique	NA	NA	SPT50969	NA	South East Africa	East Africa	AFRICA	TRUE	uncallable	uncallable	uncallable	uncallable	ERR4661396	NA	96.419	TRUE
Mozambique	NA	NA	SPT50970	NA	South East Africa	East Africa	AFRICA	TRUE	uncallable	uncallable	uncallable	uncallable	ERR4661397	NA	43.9926	TRUE
Mozambique	NA	NA	SPT51028	NA	South East Africa	East Africa	AFRICA	TRUE	uncallable	uncallable	uncallable	uncallable	ERR4661398	NA	13.6123	TRUE
Mozambique	NA	NA	SPT51025	NA	South East Africa	East Africa	AFRICA	TRUE	uncallable	uncallable	uncallable	uncallable	ERR4661399	NA	18.3543	TRUE
Mozambique	NA	NA	SPT50980	NA	South East Africa	East Africa	AFRICA	TRUE	uncallable	uncallable	uncallable	uncallable	ERR4661400	NA	28.2178	TRUE
Mozambique	NA	NA	SPT50974	NA	South East Africa	East Africa	AFRICA	TRUE	uncallable	uncallable	uncallable	uncallable	ERR4661401	NA	82.7806	TRUE
Mozambique	NA	NA	SPT51045	NA	South East Africa	East Africa	AFRICA	TRUE	uncallable	uncallable	uncallable	uncallable	ERR4661402	NA	69.2081	TRUE
Mozambique	NA	NA	SPT51038	NA	South East Africa	East Africa	AFRICA	TRUE	uncallable	uncallable	uncallable	uncallable	ERR4661403	NA	13.4007	TRUE
Mozambique	NA	NA	SPT51041	NA	South East Africa	East Africa	AFRICA	TRUE	uncallable	uncallable	uncallable	uncallable	ERR4661404	NA	58.5699	TRUE
Mozambique	NA	NA	SPT51039	NA	South East Africa	East Africa	AFRICA	TRUE	uncallable	uncallable	uncallable	uncallable	ERR4661405	NA	46.7989	TRUE
Mozambique	NA	NA	SPT51144	NA	South East Africa	East Africa	AFRICA	TRUE	uncallable	uncallable	uncallable	uncallable	ERR4661406	NA	11.4555	TRUE
Mozambique	NA	NA	SPT51143	NA	South East Africa	East Africa	AFRICA	TRUE	uncallable	uncallable	uncallable	uncallable	ERR4661407	NA	27.8763	TRUE
Mozambique	NA	NA	SPT51055	NA	South East Africa	East Africa	AFRICA	TRUE	uncallable	uncallable	uncallable	uncallable	ERR4661408	NA	10.5098	TRUE
Mozambique	NA	NA	SPT51185	NA	South East Africa	East Africa	AFRICA	TRUE	uncallable	uncallable	uncallable	uncallable	ERR4661409	NA	144.086	TRUE
Mozambique	NA	NA	SPT51182	NA	South East Africa	East Africa	AFRICA	TRUE	uncallable	uncallable	uncallable	uncallable	ERR4661410	NA	215.428	TRUE
Mozambique	NA	NA	SPT51183	NA	South East Africa	East Africa	AFRICA	TRUE	uncallable	uncallable	uncallable	uncallable	ERR4661411	NA	30.4994	TRUE
Mozambique	NA	NA	SPT51178	NA	South East Africa	East Africa	AFRICA	TRUE	uncallable	uncallable	uncallable	uncallable	ERR4661412	NA	131.134	TRUE
Mozambique	NA	NA	SPT51180	NA	South East Africa	East Africa	AFRICA	TRUE	uncallable	uncallable	uncallable	uncallable	ERR4661413	NA	20.2965	TRUE
Mozambique	NA	NA	SPT51176	NA	South East Africa	East Africa	AFRICA	TRUE	uncallable	uncallable	uncallable	uncallable	ERR4661414	NA	9.40164	TRUE
Mozambique	NA	NA	SPT51172	NA	South East Africa	East Africa	AFRICA	TRUE	uncallable	uncallable	uncallable	uncallable	ERR4661415	NA	32.3214	TRUE
Mozambique	NA	NA	SPT51175	NA	South East Africa	East Africa	AFRICA	TRUE	uncallable	uncallable	uncallable	uncallable	ERR4661416	NA	130.42	TRUE
Mozambique	NA	NA	SPT51174	NA	South East Africa	East Africa	AFRICA	TRUE	uncallable	uncallable	uncallable	uncallable	ERR4661417	NA	125.188	TRUE
Mozambique	NA	NA	SPT51157	NA	South East Africa	East Africa	AFRICA	TRUE	uncallable	uncallable	uncallable	uncallable	ERR4661418	NA	181.187	TRUE
Mozambique	NA	NA	SPT51156	NA	South East Africa	East Africa	AFRICA	TRUE	uncallable	uncallable	uncallable	uncallable	ERR4661419	NA	37.9486	TRUE
Mozambique	NA	NA	SPT51155	NA	South East Africa	East Africa	AFRICA	TRUE	uncallable	uncallable	uncallable	uncallable	ERR4661420	NA	66.1052	TRUE
Mozambique	NA	NA	SPT51154	NA	South East Africa	East Africa	AFRICA	TRUE	uncallable	uncallable	uncallable	uncallable	ERR4661421	NA	11.3828	TRUE
Mozambique	NA	NA	SPT51159	NA	South East Africa	East Africa	AFRICA	TRUE	uncallable	uncallable	uncallable	uncallable	ERR4661422	NA	124.353	TRUE
Mozambique	NA	NA	SPT51161	NA	South East Africa	East Africa	AFRICA	TRUE	uncallable	uncallable	uncallable	uncallable	ERR4661423	NA	161.849	TRUE
Mozambique	NA	NA	SPT51160	NA	South East Africa	East Africa	AFRICA	TRUE	uncallable	uncallable	uncallable	uncallable	ERR4661424	NA	192.297	TRUE
Mozambique	NA	NA	SPT51150	NA	South East Africa	East Africa	AFRICA	TRUE	uncallable	uncallable	uncallable	uncallable	ERR4661425	NA	137.55	TRUE
Mozambique	NA	NA	SPT51237	NA	South East Africa	East Africa	AFRICA	TRUE	uncallable	uncallable	uncallable	uncallable	ERR4661426	NA	14.0995	TRUE
Mozambique	NA	NA	SPT51234	NA	South East Africa	East Africa	AFRICA	TRUE	uncallable	uncallable	uncallable	uncallable	ERR4661427	NA	168.416	TRUE
Mozambique	NA	NA	SPT51164	NA	South East Africa	East Africa	AFRICA	TRUE	uncallable	uncallable	uncallable	uncallable	ERR4661428	NA	58.3304	TRUE
Mozambique	NA	NA	SPT51169	NA	South East Africa	East Africa	AFRICA	TRUE	uncallable	uncallable	uncallable	uncallable	ERR4661429	NA	172.386	TRUE
Mozambique	NA	NA	SPT51166	NA	South East Africa	East Africa	AFRICA	TRUE	uncallable	uncallable	uncallable	uncallable	ERR4661430	NA	148.582	TRUE
Mozambique	NA	NA	SPT51225	NA	South East Africa	East Africa	AFRICA	TRUE	uncallable	uncallable	uncallable	uncallable	ERR4661431	NA	150.547	TRUE
Mozambique	NA	NA	SPT51223	NA	South East Africa	East Africa	AFRICA	TRUE	uncallable	uncallable	uncallable	uncallable	ERR4661432	NA	68.9454	TRUE
Mozambique	NA	NA	SPT51222	NA	South East Africa	East Africa	AFRICA	TRUE	uncallable	uncallable	uncallable	uncallable	ERR4661433	NA	13.1099	TRUE
Mozambique	NA	NA	SPT51221	NA	South East Africa	East Africa	AFRICA	TRUE	uncallable	uncallable	uncallable	uncallable	ERR4661434	NA	149.664	TRUE
Mozambique	NA	NA	SPT51218	NA	South East Africa	East Africa	AFRICA	TRUE	uncallable	uncallable	uncallable	uncallable	ERR4661435	NA	177.111	TRUE
Mozambique	NA	NA	SPT51195	NA	South East Africa	East Africa	AFRICA	TRUE	uncallable	uncallable	uncallable	uncallable	ERR4661436	NA	44.8836	TRUE
Mozambique	NA	NA	SPT51201	NA	South East Africa	East Africa	AFRICA	TRUE	uncallable	uncallable	uncallable	uncallable	ERR4661437	NA	81.2993	TRUE
Mozambique	NA	NA	SPT51198	NA	South East Africa	East Africa	AFRICA	TRUE	uncallable	uncallable	uncallable	uncallable	ERR4661438	NA	112.293	TRUE
Mozambique	NA	NA	SPT51226	NA	South East Africa	East Africa	AFRICA	TRUE	uncallable	uncallable	uncallable	uncallable	ERR4661439	NA	121.208	TRUE
Mozambique	NA	NA	SPT51229	NA	South East Africa	East Africa	AFRICA	TRUE	uncallable	uncallable	uncallable	uncallable	ERR4661440	NA	155.135	TRUE
Mozambique	NA	NA	SPT51227	NA	South East Africa	East Africa	AFRICA	TRUE	uncallable	uncallable	uncallable	uncallable	ERR4661441	NA	131.929	TRUE
Mozambique	NA	NA	SPT51232	NA	South East Africa	East Africa	AFRICA	TRUE	uncallable	uncallable	uncallable	uncallable	ERR4661442	NA	64.7502	TRUE
Mozambique	NA	NA	SPT51191	NA	South East Africa	East Africa	AFRICA	TRUE	uncallable	uncallable	uncallable	uncallable	ERR4661443	NA	69.9135	TRUE
Mozambique	NA	NA	SPT51187	NA	South East Africa	East Africa	AFRICA	TRUE	uncallable	uncallable	uncallable	uncallable	ERR4661444	NA	9.47078	TRUE
Mozambique	NA	NA	SPT51189	NA	South East Africa	East Africa	AFRICA	TRUE	uncallable	uncallable	uncallable	uncallable	ERR4661445	NA	63.2857	TRUE
Mozambique	NA	NA	SPT51190	NA	South East Africa	East Africa	AFRICA	TRUE	uncallable	uncallable	uncallable	uncallable	ERR4661446	NA	59.1358	TRUE
Mozambique	NA	NA	SPT51216	NA	South East Africa	East Africa	AFRICA	TRUE	uncallable	uncallable	uncallable	uncallable	ERR4661447	NA	98.8777	TRUE
Mozambique	NA	NA	SPT51214	NA	South East Africa	East Africa	AFRICA	TRUE	uncallable	uncallable	uncallable	uncallable	ERR4661448	NA	30.142	TRUE
Mozambique	NA	NA	SPT51215	NA	South East Africa	East Africa	AFRICA	TRUE	uncallable	uncallable	uncallable	uncallable	ERR4661449	NA	37.3265	TRUE
Mozambique	NA	NA	SPT51213	NA	South East Africa	East Africa	AFRICA	TRUE	uncallable	uncallable	uncallable	uncallable	ERR4661450	NA	117.343	TRUE
Mozambique	NA	NA	SPT51211	NA	South East Africa	East Africa	AFRICA	TRUE	uncallable	uncallable	uncallable	uncallable	ERR4661451	NA	78.8235	TRUE
Mozambique	NA	NA	SPT51204	NA	South East Africa	East Africa	AFRICA	TRUE	uncallable	uncallable	uncallable	uncallable	ERR4661452	NA	134.982	TRUE
Mozambique	NA	NA	SPT51209	NA	South East Africa	East Africa	AFRICA	TRUE	uncallable	uncallable	uncallable	uncallable	ERR4661453	NA	16.236	TRUE
Mozambique	NA	NA	SPT51273	NA	South East Africa	East Africa	AFRICA	TRUE	uncallable	uncallable	uncallable	uncallable	ERR4661454	NA	11.8076	TRUE
Mozambique	NA	NA	SPT51272	NA	South East Africa	East Africa	AFRICA	TRUE	uncallable	uncallable	uncallable	uncallable	ERR4661455	NA	17.8548	TRUE
Mozambique	NA	NA	SPT51274	NA	South East Africa	East Africa	AFRICA	TRUE	uncallable	uncallable	uncallable	uncallable	ERR4661456	NA	109.559	TRUE
Mozambique	NA	NA	SPT51277	NA	South East Africa	East Africa	AFRICA	TRUE	uncallable	uncallable	uncallable	uncallable	ERR4661457	NA	22.5318	TRUE
Mozambique	NA	NA	SPT51279	NA	South East Africa	East Africa	AFRICA	TRUE	uncallable	uncallable	uncallable	uncallable	ERR4661458	NA	181.068	TRUE
Mozambique	NA	NA	SPT51276	NA	South East Africa	East Africa	AFRICA	TRUE	uncallable	uncallable	uncallable	uncallable	ERR4661459	NA	174.502	TRUE
Mozambique	NA	NA	SPT51282	NA	South East Africa	East Africa	AFRICA	TRUE	uncallable	uncallable	uncallable	uncallable	ERR4661460	NA	105.731	TRUE
Mozambique	NA	NA	SPT51283	NA	South East Africa	East Africa	AFRICA	TRUE	uncallable	uncallable	uncallable	uncallable	ERR4661461	NA	9.53973	TRUE
Mozambique	NA	NA	SPT51286	NA	South East Africa	East Africa	AFRICA	TRUE	uncallable	uncallable	uncallable	uncallable	ERR4661462	NA	54.7774	TRUE
Mozambique	NA	NA	SPT51287	NA	South East Africa	East Africa	AFRICA	TRUE	uncallable	uncallable	uncallable	uncallable	ERR4661463	NA	97.8669	TRUE
Mozambique	NA	NA	SPT51284	NA	South East Africa	East Africa	AFRICA	TRUE	uncallable	uncallable	uncallable	uncallable	ERR4661464	NA	71.1273	TRUE
Mozambique	NA	NA	SPT51265	NA	South East Africa	East Africa	AFRICA	TRUE	uncallable	uncallable	uncallable	uncallable	ERR4661465	NA	62.3447	TRUE
Mozambique	NA	NA	SPT51270	NA	South East Africa	East Africa	AFRICA	TRUE	uncallable	uncallable	uncallable	uncallable	ERR4661466	NA	26.9425	TRUE
Mozambique	NA	NA	SPT51323	NA	South East Africa	East Africa	AFRICA	TRUE	uncallable	uncallable	uncallable	uncallable	ERR4661467	NA	111.284	TRUE
Mozambique	NA	NA	SPT51321	NA	South East Africa	East Africa	AFRICA	TRUE	uncallable	uncallable	uncallable	uncallable	ERR4661468	NA	107.916	TRUE
Mozambique	NA	NA	SPT51322	NA	South East Africa	East Africa	AFRICA	TRUE	uncallable	uncallable	uncallable	uncallable	ERR4661469	NA	76.803	TRUE
Mozambique	NA	NA	SPT51327	NA	South East Africa	East Africa	AFRICA	TRUE	uncallable	uncallable	uncallable	uncallable	ERR4661470	NA	65.4103	TRUE
Mozambique	NA	NA	SPT51313	NA	South East Africa	East Africa	AFRICA	TRUE	uncallable	uncallable	uncallable	uncallable	ERR4661471	NA	99.2671	TRUE
Mozambique	NA	NA	SPT51314	NA	South East Africa	East Africa	AFRICA	TRUE	uncallable	uncallable	uncallable	uncallable	ERR4661472	NA	115.804	TRUE
Mozambique	NA	NA	SPT51316	NA	South East Africa	East Africa	AFRICA	TRUE	uncallable	uncallable	uncallable	uncallable	ERR4661473	NA	73.4571	TRUE
Mozambique	NA	NA	SPT51318	NA	South East Africa	East Africa	AFRICA	TRUE	uncallable	uncallable	uncallable	uncallable	ERR4661474	NA	76.3876	TRUE
Mozambique	NA	NA	SPT51241	NA	South East Africa	East Africa	AFRICA	TRUE	uncallable	uncallable	uncallable	uncallable	ERR4661475	NA	101.028	TRUE
Mozambique	NA	NA	SPT51242	NA	South East Africa	East Africa	AFRICA	TRUE	uncallable	uncallable	uncallable	uncallable	ERR4661476	NA	82.3528	TRUE
Mozambique	NA	NA	SPT51244	NA	South East Africa	East Africa	AFRICA	TRUE	uncallable	uncallable	uncallable	uncallable	ERR4661477	NA	76.0921	TRUE
Mozambique	NA	NA	SPT51356	NA	South East Africa	East Africa	AFRICA	TRUE	uncallable	uncallable	uncallable	uncallable	ERR4661478	NA	162.817	TRUE
Mozambique	NA	NA	SPT51355	NA	South East Africa	East Africa	AFRICA	TRUE	uncallable	uncallable	uncallable	uncallable	ERR4661479	NA	89.8406	TRUE
Mozambique	NA	NA	SPT51353	NA	South East Africa	East Africa	AFRICA	TRUE	uncallable	uncallable	uncallable	uncallable	ERR4661480	NA	195.941	TRUE
Mozambique	NA	NA	SPT51412	NA	South East Africa	East Africa	AFRICA	TRUE	uncallable	uncallable	uncallable	uncallable	ERR4661481	NA	78.0925	TRUE
Mozambique	NA	NA	SPT51413	NA	South East Africa	East Africa	AFRICA	TRUE	uncallable	uncallable	uncallable	uncallable	ERR4661482	NA	222.766	TRUE
Mozambique	NA	NA	SPT51411	NA	South East Africa	East Africa	AFRICA	TRUE	uncallable	uncallable	uncallable	uncallable	ERR4661483	NA	156.813	TRUE
Mozambique	NA	NA	SPT51408	NA	South East Africa	East Africa	AFRICA	TRUE	uncallable	uncallable	uncallable	uncallable	ERR4661484	NA	232.557	TRUE
Mozambique	NA	NA	SPT51407	NA	South East Africa	East Africa	AFRICA	TRUE	uncallable	uncallable	uncallable	uncallable	ERR4661485	NA	16.1999	TRUE
Mozambique	NA	NA	SPT51419	NA	South East Africa	East Africa	AFRICA	TRUE	uncallable	uncallable	uncallable	uncallable	ERR4661486	NA	39.5158	TRUE
Mozambique	NA	NA	SPT51417	NA	South East Africa	East Africa	AFRICA	TRUE	uncallable	uncallable	uncallable	uncallable	ERR4661487	NA	17.5693	TRUE
Mozambique	NA	NA	SPT51416	NA	South East Africa	East Africa	AFRICA	TRUE	uncallable	uncallable	uncallable	uncallable	ERR4661488	NA	134.185	TRUE
Mozambique	NA	NA	SPT51415	NA	South East Africa	East Africa	AFRICA	TRUE	uncallable	uncallable	uncallable	uncallable	ERR4661489	NA	69.8268	TRUE
Mozambique	NA	NA	SPT51341	NA	South East Africa	East Africa	AFRICA	TRUE	uncallable	uncallable	uncallable	uncallable	ERR4661490	NA	17.7144	TRUE
Mozambique	NA	NA	SPT51338	NA	South East Africa	East Africa	AFRICA	TRUE	uncallable	uncallable	uncallable	uncallable	ERR4661491	NA	147.573	TRUE
Mozambique	NA	NA	SPT51337	NA	South East Africa	East Africa	AFRICA	TRUE	uncallable	uncallable	uncallable	uncallable	ERR4661492	NA	96.373	TRUE
Mozambique	NA	NA	SPT51404	NA	South East Africa	East Africa	AFRICA	TRUE	uncallable	uncallable	uncallable	uncallable	ERR4661493	NA	80.2885	TRUE
Mozambique	NA	NA	SPT51403	NA	South East Africa	East Africa	AFRICA	TRUE	uncallable	uncallable	uncallable	uncallable	ERR4661494	NA	117.907	TRUE
Mozambique	NA	NA	SPT51402	NA	South East Africa	East Africa	AFRICA	TRUE	uncallable	uncallable	uncallable	uncallable	ERR4661495	NA	56.4668	TRUE
Mozambique	NA	NA	SPT51401	NA	South East Africa	East Africa	AFRICA	TRUE	uncallable	uncallable	uncallable	uncallable	ERR4661496	NA	35.9685	TRUE
Mozambique	NA	NA	SPT51399	NA	South East Africa	East Africa	AFRICA	TRUE	uncallable	uncallable	uncallable	uncallable	ERR4661497	NA	59.9846	TRUE
Mozambique	NA	NA	SPT51398	NA	South East Africa	East Africa	AFRICA	TRUE	uncallable	uncallable	uncallable	uncallable	ERR4661498	NA	172.042	TRUE
Mozambique	NA	NA	SPT51400	NA	South East Africa	East Africa	AFRICA	TRUE	uncallable	uncallable	uncallable	uncallable	ERR4661499	NA	47.8398	TRUE
Mozambique	NA	NA	SPT51386	NA	South East Africa	East Africa	AFRICA	TRUE	uncallable	uncallable	uncallable	uncallable	ERR4661500	NA	41.3556	TRUE
Mozambique	NA	NA	SPT51379	NA	South East Africa	East Africa	AFRICA	TRUE	uncallable	uncallable	uncallable	uncallable	ERR4661501	NA	41.3077	TRUE
Mozambique	NA	NA	SPT51381	NA	South East Africa	East Africa	AFRICA	TRUE	uncallable	uncallable	uncallable	uncallable	ERR4661502	NA	89.9253	TRUE
Mozambique	NA	NA	SPT51376	NA	South East Africa	East Africa	AFRICA	TRUE	uncallable	uncallable	uncallable	uncallable	ERR4661503	NA	142.187	TRUE
Mozambique	NA	NA	SPT51378	NA	South East Africa	East Africa	AFRICA	TRUE	uncallable	uncallable	uncallable	uncallable	ERR4661504	NA	66.7657	TRUE
Mozambique	NA	NA	SPT51395	NA	South East Africa	East Africa	AFRICA	TRUE	uncallable	uncallable	uncallable	uncallable	ERR4661505	NA	6.16686	TRUE
Mozambique	NA	NA	SPT51390	NA	South East Africa	East Africa	AFRICA	TRUE	uncallable	uncallable	uncallable	uncallable	ERR4661506	NA	24.4312	TRUE
Mozambique	NA	NA	SPT51391	NA	South East Africa	East Africa	AFRICA	TRUE	uncallable	uncallable	uncallable	uncallable	ERR4661507	NA	109.224	TRUE
Mozambique	NA	NA	SPT51393	NA	South East Africa	East Africa	AFRICA	TRUE	uncallable	uncallable	uncallable	uncallable	ERR4661508	NA	132.063	TRUE
Mozambique	NA	NA	SPT51392	NA	South East Africa	East Africa	AFRICA	TRUE	uncallable	uncallable	uncallable	uncallable	ERR4661509	NA	105.294	TRUE
Mozambique	NA	NA	SPT51422	NA	South East Africa	East Africa	AFRICA	TRUE	uncallable	uncallable	uncallable	uncallable	ERR4661510	NA	61.7671	TRUE
Mozambique	NA	NA	SPT51423	NA	South East Africa	East Africa	AFRICA	TRUE	uncallable	uncallable	uncallable	uncallable	ERR4661511	NA	61.0044	TRUE
Mozambique	NA	NA	SPT51425	NA	South East Africa	East Africa	AFRICA	TRUE	uncallable	uncallable	uncallable	uncallable	ERR4661512	NA	72.121	TRUE
Mozambique	NA	NA	SPT51447	NA	South East Africa	East Africa	AFRICA	TRUE	uncallable	uncallable	uncallable	uncallable	ERR4661513	NA	58.5645	TRUE
Mozambique	NA	NA	SPT51444	NA	South East Africa	East Africa	AFRICA	TRUE	uncallable	uncallable	uncallable	uncallable	ERR4661514	NA	170.282	TRUE
Mozambique	NA	NA	SPT51448	NA	South East Africa	East Africa	AFRICA	TRUE	uncallable	uncallable	uncallable	uncallable	ERR4661515	NA	307.166	TRUE
Mozambique	NA	NA	SPT51481	NA	South East Africa	East Africa	AFRICA	TRUE	uncallable	uncallable	uncallable	uncallable	ERR4661516	NA	78.8145	TRUE
Mozambique	NA	NA	SPT51477	NA	South East Africa	East Africa	AFRICA	TRUE	uncallable	uncallable	uncallable	uncallable	ERR4661517	NA	233.147	TRUE
Mozambique	NA	NA	SPT51504	NA	South East Africa	East Africa	AFRICA	TRUE	uncallable	uncallable	uncallable	uncallable	ERR4661518	NA	96.0112	TRUE
Mozambique	NA	NA	SPT51507	NA	South East Africa	East Africa	AFRICA	TRUE	uncallable	uncallable	uncallable	uncallable	ERR4661519	NA	79.2909	TRUE
Mozambique	NA	NA	SPT51500	NA	South East Africa	East Africa	AFRICA	TRUE	uncallable	uncallable	uncallable	uncallable	ERR4661520	NA	26.1637	TRUE
Mozambique	NA	NA	SPT51503	NA	South East Africa	East Africa	AFRICA	TRUE	uncallable	uncallable	uncallable	uncallable	ERR4661521	NA	200.946	TRUE
Mozambique	NA	NA	SPT51358	NA	South East Africa	East Africa	AFRICA	TRUE	uncallable	uncallable	uncallable	uncallable	ERR4661522	NA	142.395	TRUE
Mozambique	NA	NA	SPT51361	NA	South East Africa	East Africa	AFRICA	TRUE	uncallable	uncallable	uncallable	uncallable	ERR4661523	NA	51.594	TRUE
Mozambique	NA	NA	SPT51359	NA	South East Africa	East Africa	AFRICA	TRUE	uncallable	uncallable	uncallable	uncallable	ERR4661524	NA	43.6095	TRUE
Mozambique	NA	NA	SPT51362	NA	South East Africa	East Africa	AFRICA	TRUE	uncallable	uncallable	uncallable	uncallable	ERR4661525	NA	43.8239	TRUE
Mozambique	NA	NA	SPT51365	NA	South East Africa	East Africa	AFRICA	TRUE	uncallable	uncallable	uncallable	uncallable	ERR4661526	NA	41.8796	TRUE
Mozambique	NA	NA	SPT51364	NA	South East Africa	East Africa	AFRICA	TRUE	uncallable	uncallable	uncallable	uncallable	ERR4661527	NA	171.908	TRUE
Mozambique	NA	NA	SPT51347	NA	South East Africa	East Africa	AFRICA	TRUE	uncallable	uncallable	uncallable	uncallable	ERR4661528	NA	8.14375	TRUE
Mozambique	NA	NA	SPT51346	NA	South East Africa	East Africa	AFRICA	TRUE	uncallable	uncallable	uncallable	uncallable	ERR4661529	NA	220.446	TRUE
Mozambique	NA	NA	SPT51344	NA	South East Africa	East Africa	AFRICA	TRUE	uncallable	uncallable	uncallable	uncallable	ERR4661530	NA	78.1759	TRUE
Mozambique	NA	NA	SPT51368	NA	South East Africa	East Africa	AFRICA	TRUE	uncallable	uncallable	uncallable	uncallable	ERR4661531	NA	90.4819	TRUE
Mozambique	NA	NA	SPT51366	NA	South East Africa	East Africa	AFRICA	TRUE	uncallable	uncallable	uncallable	uncallable	ERR4661532	NA	106.061	TRUE
Mozambique	NA	NA	SPT51369	NA	South East Africa	East Africa	AFRICA	TRUE	uncallable	uncallable	uncallable	uncallable	ERR4661533	NA	54.1447	TRUE
Mozambique	NA	NA	SPT51371	NA	South East Africa	East Africa	AFRICA	TRUE	uncallable	uncallable	uncallable	uncallable	ERR4661534	NA	290.371	TRUE
Mozambique	NA	NA	SPT51367	NA	South East Africa	East Africa	AFRICA	TRUE	uncallable	uncallable	uncallable	uncallable	ERR4661535	NA	34.3206	TRUE
Mozambique	NA	NA	SPT51370	NA	South East Africa	East Africa	AFRICA	TRUE	uncallable	uncallable	uncallable	uncallable	ERR4661536	NA	162.237	TRUE
Mozambique	NA	NA	SPT51388	NA	South East Africa	East Africa	AFRICA	TRUE	uncallable	uncallable	uncallable	uncallable	ERR4661537	NA	73.9098	TRUE
Mozambique	NA	NA	SPT51389	NA	South East Africa	East Africa	AFRICA	TRUE	uncallable	uncallable	uncallable	uncallable	ERR4661538	NA	30.533	TRUE
Mozambique	NA	NA	SPT51382	NA	South East Africa	East Africa	AFRICA	TRUE	uncallable	uncallable	uncallable	uncallable	ERR4661539	NA	73.2783	TRUE
Mozambique	NA	NA	SPT51383	NA	South East Africa	East Africa	AFRICA	TRUE	uncallable	uncallable	uncallable	uncallable	ERR4661540	NA	31.3006	TRUE
Mozambique	NA	NA	SPT51387	NA	South East Africa	East Africa	AFRICA	TRUE	uncallable	uncallable	uncallable	uncallable	ERR4661541	NA	71.5	TRUE
Mozambique	NA	NA	SPT51385	NA	South East Africa	East Africa	AFRICA	TRUE	uncallable	uncallable	uncallable	uncallable	ERR4661542	NA	156.347	TRUE
Mozambique	NA	NA	SPT51384	NA	South East Africa	East Africa	AFRICA	TRUE	uncallable	uncallable	uncallable	uncallable	ERR4661543	NA	85.4602	TRUE
Mozambique	NA	NA	SPT52899	NA	South East Africa	East Africa	AFRICA	TRUE	uncallable	uncallable	uncallable	uncallable	ERR4661544	NA	29.1333	TRUE
Mozambique	NA	NA	SPT52901	NA	South East Africa	East Africa	AFRICA	TRUE	uncallable	uncallable	uncallable	uncallable	ERR4661545	NA	31.5737	TRUE
Mozambique	NA	NA	SPT52882	NA	South East Africa	East Africa	AFRICA	TRUE	uncallable	uncallable	uncallable	uncallable	ERR4661546	NA	11.8407	TRUE
Mozambique	NA	NA	SPT52886	NA	South East Africa	East Africa	AFRICA	TRUE	uncallable	uncallable	uncallable	uncallable	ERR4661547	NA	64.4178	TRUE
Mozambique	NA	NA	SPT52885	NA	South East Africa	East Africa	AFRICA	TRUE	uncallable	uncallable	uncallable	uncallable	ERR4661548	NA	82.2711	TRUE
Mozambique	NA	NA	SPT52963	NA	South East Africa	East Africa	AFRICA	TRUE	uncallable	uncallable	uncallable	uncallable	ERR4661549	NA	24.7933	TRUE
Mozambique	NA	NA	SPT52961	NA	South East Africa	East Africa	AFRICA	TRUE	uncallable	uncallable	uncallable	uncallable	ERR4661550	NA	72.2486	TRUE
Mozambique	NA	NA	SPT52962	NA	South East Africa	East Africa	AFRICA	TRUE	uncallable	uncallable	uncallable	uncallable	ERR4661551	NA	47.7377	TRUE
Mozambique	NA	NA	SPT52960	NA	South East Africa	East Africa	AFRICA	TRUE	uncallable	uncallable	uncallable	uncallable	ERR4661552	NA	64.9805	TRUE
Mozambique	NA	NA	SPT52959	NA	South East Africa	East Africa	AFRICA	TRUE	uncallable	uncallable	uncallable	uncallable	ERR4661553	NA	42.7041	TRUE
Mozambique	NA	NA	SPT52971	NA	South East Africa	East Africa	AFRICA	TRUE	uncallable	uncallable	uncallable	uncallable	ERR4661554	NA	48.9912	TRUE
Mozambique	NA	NA	SPT52969	NA	South East Africa	East Africa	AFRICA	TRUE	uncallable	uncallable	uncallable	uncallable	ERR4661555	NA	133.184	TRUE
Mozambique	NA	NA	SPT52967	NA	South East Africa	East Africa	AFRICA	TRUE	uncallable	uncallable	uncallable	uncallable	ERR4661556	NA	91.0437	TRUE
Mozambique	NA	NA	SPT52968	NA	South East Africa	East Africa	AFRICA	TRUE	uncallable	uncallable	uncallable	uncallable	ERR4661557	NA	134.959	TRUE
Mozambique	NA	NA	SPT52965	NA	South East Africa	East Africa	AFRICA	TRUE	uncallable	uncallable	uncallable	uncallable	ERR4661558	NA	3.1293	TRUE
Mozambique	NA	NA	SPT52980	NA	South East Africa	East Africa	AFRICA	TRUE	uncallable	uncallable	uncallable	uncallable	ERR4661559	NA	7.61782	TRUE
Mozambique	NA	NA	SPT52979	NA	South East Africa	East Africa	AFRICA	TRUE	uncallable	uncallable	uncallable	uncallable	ERR4661560	NA	1.9569	TRUE
Mozambique	NA	NA	SPT52974	NA	South East Africa	East Africa	AFRICA	TRUE	uncallable	uncallable	uncallable	uncallable	ERR4661561	NA	6.27196	TRUE
Mozambique	NA	NA	SPT52975	NA	South East Africa	East Africa	AFRICA	TRUE	uncallable	uncallable	uncallable	uncallable	ERR4661562	NA	47.7981	TRUE
Mozambique	NA	NA	SPT53036	NA	South East Africa	East Africa	AFRICA	TRUE	uncallable	uncallable	uncallable	uncallable	ERR4661563	NA	14.4603	TRUE
Mozambique	NA	NA	SPT53034	NA	South East Africa	East Africa	AFRICA	TRUE	uncallable	uncallable	uncallable	uncallable	ERR4661564	NA	48.9432	TRUE
Mozambique	NA	NA	SPT53035	NA	South East Africa	East Africa	AFRICA	TRUE	uncallable	uncallable	uncallable	uncallable	ERR4661565	NA	6.89149	TRUE
Mozambique	NA	NA	SPT53030	NA	South East Africa	East Africa	AFRICA	TRUE	uncallable	uncallable	uncallable	uncallable	ERR4661566	NA	23.0674	TRUE
Mozambique	NA	NA	SPT53033	NA	South East Africa	East Africa	AFRICA	TRUE	uncallable	uncallable	uncallable	uncallable	ERR4661567	NA	17.5126	TRUE
Mozambique	NA	NA	SPT53053	NA	South East Africa	East Africa	AFRICA	TRUE	uncallable	uncallable	uncallable	uncallable	ERR4661568	NA	23.6177	TRUE
Mozambique	NA	NA	SPT53081	NA	South East Africa	East Africa	AFRICA	TRUE	uncallable	uncallable	uncallable	uncallable	ERR4661569	NA	29.1384	TRUE
Mozambique	NA	NA	SPT53076	NA	South East Africa	East Africa	AFRICA	TRUE	uncallable	uncallable	uncallable	uncallable	ERR4661570	NA	32.2553	TRUE
Mozambique	NA	NA	SPT53078	NA	South East Africa	East Africa	AFRICA	TRUE	uncallable	uncallable	uncallable	uncallable	ERR4661571	NA	46.5629	TRUE
Mozambique	NA	NA	SPT53077	NA	South East Africa	East Africa	AFRICA	TRUE	uncallable	uncallable	uncallable	uncallable	ERR4661572	NA	26.9482	TRUE
Mozambique	NA	NA	SPT53079	NA	South East Africa	East Africa	AFRICA	TRUE	uncallable	uncallable	uncallable	uncallable	ERR4661573	NA	9.27674	TRUE
Mozambique	NA	NA	SPT53080	NA	South East Africa	East Africa	AFRICA	TRUE	uncallable	uncallable	uncallable	uncallable	ERR4661574	NA	31.5552	TRUE
Mozambique	NA	NA	SPT53082	NA	South East Africa	East Africa	AFRICA	TRUE	uncallable	uncallable	uncallable	uncallable	ERR4661575	NA	79.6516	TRUE
Mozambique	NA	NA	SPT53119	NA	South East Africa	East Africa	AFRICA	TRUE	uncallable	uncallable	uncallable	uncallable	ERR4661576	NA	3.30062	TRUE
Mozambique	NA	NA	SPT53118	NA	South East Africa	East Africa	AFRICA	TRUE	uncallable	uncallable	uncallable	uncallable	ERR4661577	NA	44.8773	TRUE
Mozambique	NA	NA	SPT53117	NA	South East Africa	East Africa	AFRICA	TRUE	uncallable	uncallable	uncallable	uncallable	ERR4661578	NA	130.696	TRUE
Mozambique	NA	NA	SPT53116	NA	South East Africa	East Africa	AFRICA	TRUE	uncallable	uncallable	uncallable	uncallable	ERR4661579	NA	78.5871	TRUE
Mozambique	NA	NA	SPT53122	NA	South East Africa	East Africa	AFRICA	TRUE	uncallable	uncallable	uncallable	uncallable	ERR4661580	NA	8.14463	TRUE
Mozambique	NA	NA	SPT53115	NA	South East Africa	East Africa	AFRICA	TRUE	uncallable	uncallable	uncallable	uncallable	ERR4661581	NA	144.957	TRUE
Mozambique	NA	NA	SPT53121	NA	South East Africa	East Africa	AFRICA	TRUE	uncallable	uncallable	uncallable	uncallable	ERR4661582	NA	150.489	TRUE
Mozambique	NA	NA	SPT53107	NA	South East Africa	East Africa	AFRICA	TRUE	uncallable	uncallable	uncallable	uncallable	ERR4661583	NA	68.4615	TRUE
Mozambique	NA	NA	SPT53109	NA	South East Africa	East Africa	AFRICA	TRUE	uncallable	uncallable	uncallable	uncallable	ERR4661584	NA	95.6872	TRUE
Mozambique	NA	NA	SPT53113	NA	South East Africa	East Africa	AFRICA	TRUE	uncallable	uncallable	uncallable	uncallable	ERR4661585	NA	15.9177	TRUE
Mozambique	NA	NA	SPT53112	NA	South East Africa	East Africa	AFRICA	TRUE	uncallable	uncallable	uncallable	uncallable	ERR4661586	NA	184.752	TRUE
Mozambique	NA	NA	SPT53111	NA	South East Africa	East Africa	AFRICA	TRUE	uncallable	uncallable	uncallable	uncallable	ERR4661587	NA	98.6538	TRUE
Mozambique	NA	NA	SPT53110	NA	South East Africa	East Africa	AFRICA	TRUE	uncallable	uncallable	uncallable	uncallable	ERR4661588	NA	12.5498	TRUE
Mozambique	NA	NA	SPT53123	NA	South East Africa	East Africa	AFRICA	TRUE	uncallable	uncallable	uncallable	uncallable	ERR4661589	NA	8.5021	TRUE
Mozambique	NA	NA	SPT53130	NA	South East Africa	East Africa	AFRICA	TRUE	uncallable	uncallable	uncallable	uncallable	ERR4661590	NA	157.318	TRUE
Mozambique	NA	NA	SPT53128	NA	South East Africa	East Africa	AFRICA	TRUE	uncallable	uncallable	uncallable	uncallable	ERR4661591	NA	20.0483	TRUE
Mozambique	NA	NA	SPT52688	NA	South East Africa	East Africa	AFRICA	TRUE	uncallable	uncallable	uncallable	uncallable	ERR4661592	NA	6.477	TRUE
Mozambique	NA	NA	SPT52751	NA	South East Africa	East Africa	AFRICA	TRUE	uncallable	uncallable	uncallable	uncallable	ERR4661593	NA	23.5094	TRUE
Mozambique	NA	NA	SPT52711	NA	South East Africa	East Africa	AFRICA	TRUE	uncallable	uncallable	uncallable	uncallable	ERR4661594	NA	24.0153	TRUE
Mozambique	NA	NA	SPT52703	NA	South East Africa	East Africa	AFRICA	TRUE	uncallable	uncallable	uncallable	uncallable	ERR4661595	NA	11.2779	TRUE
Mozambique	NA	NA	SPT52721	NA	South East Africa	East Africa	AFRICA	TRUE	uncallable	uncallable	uncallable	uncallable	ERR4661596	NA	36.2492	TRUE
Mozambique	NA	NA	SPT52773	NA	South East Africa	East Africa	AFRICA	TRUE	uncallable	uncallable	uncallable	uncallable	ERR4661597	NA	31.2739	TRUE
Mozambique	NA	NA	SPT52745	NA	South East Africa	East Africa	AFRICA	TRUE	uncallable	uncallable	uncallable	uncallable	ERR4661598	NA	22.9802	TRUE
Mozambique	NA	NA	SPT52738	NA	South East Africa	East Africa	AFRICA	TRUE	uncallable	uncallable	uncallable	uncallable	ERR4661599	NA	107.788	TRUE
Mozambique	NA	NA	SPT52691	NA	South East Africa	East Africa	AFRICA	TRUE	uncallable	uncallable	uncallable	uncallable	ERR4661600	NA	30.2376	TRUE
Mozambique	NA	NA	SPT52689	NA	South East Africa	East Africa	AFRICA	TRUE	uncallable	uncallable	uncallable	uncallable	ERR4661601	NA	44.2348	TRUE
Mozambique	NA	NA	SPT52754	NA	South East Africa	East Africa	AFRICA	TRUE	uncallable	uncallable	uncallable	uncallable	ERR4661602	NA	23.7595	TRUE
Mozambique	NA	NA	SPT52704	NA	South East Africa	East Africa	AFRICA	TRUE	uncallable	uncallable	uncallable	uncallable	ERR4661603	NA	18.5307	TRUE
Mozambique	NA	NA	SPT52720	NA	South East Africa	East Africa	AFRICA	TRUE	uncallable	uncallable	uncallable	uncallable	ERR4661604	NA	24.1261	TRUE
Mozambique	NA	NA	SPT52768	NA	South East Africa	East Africa	AFRICA	TRUE	uncallable	uncallable	uncallable	uncallable	ERR4661605	NA	37.6502	TRUE
Mozambique	NA	NA	SPT52692	NA	South East Africa	East Africa	AFRICA	TRUE	uncallable	uncallable	uncallable	uncallable	ERR4661606	NA	21.2088	TRUE
Mozambique	NA	NA	SPT52729	NA	South East Africa	East Africa	AFRICA	TRUE	uncallable	uncallable	uncallable	uncallable	ERR4661607	NA	110.208	TRUE
Mozambique	NA	NA	SPT52690	NA	South East Africa	East Africa	AFRICA	TRUE	uncallable	uncallable	uncallable	uncallable	ERR4661608	NA	44.2405	TRUE
Mozambique	NA	NA	SPT52753	NA	South East Africa	East Africa	AFRICA	TRUE	uncallable	uncallable	uncallable	uncallable	ERR4661609	NA	5.68817	TRUE
Mozambique	NA	NA	SPT52713	NA	South East Africa	East Africa	AFRICA	TRUE	uncallable	uncallable	uncallable	uncallable	ERR4661610	NA	1.62743	TRUE
Mozambique	NA	NA	SPT52702	NA	South East Africa	East Africa	AFRICA	TRUE	uncallable	uncallable	uncallable	uncallable	ERR4661611	NA	26.612	TRUE
Mozambique	NA	NA	SPT52715	NA	South East Africa	East Africa	AFRICA	TRUE	uncallable	uncallable	uncallable	uncallable	ERR4661612	NA	68.2152	TRUE
Mozambique	NA	NA	SPT52757	NA	South East Africa	East Africa	AFRICA	TRUE	uncallable	uncallable	uncallable	uncallable	ERR4661613	NA	10.584	TRUE
Mozambique	NA	NA	SPT52825	NA	South East Africa	East Africa	AFRICA	TRUE	uncallable	uncallable	uncallable	uncallable	ERR4661614	NA	181.766	TRUE
Mozambique	NA	NA	SPT52831	NA	South East Africa	East Africa	AFRICA	TRUE	uncallable	uncallable	uncallable	uncallable	ERR4661615	NA	48.5182	TRUE
Mozambique	NA	NA	SPT52826	NA	South East Africa	East Africa	AFRICA	TRUE	uncallable	uncallable	uncallable	uncallable	ERR4661616	NA	18.067	TRUE
Mozambique	NA	NA	SPT52828	NA	South East Africa	East Africa	AFRICA	TRUE	uncallable	uncallable	uncallable	uncallable	ERR4661617	NA	135.293	TRUE
Mozambique	NA	NA	SPT52830	NA	South East Africa	East Africa	AFRICA	TRUE	uncallable	uncallable	uncallable	uncallable	ERR4661618	NA	49.5952	TRUE
Mozambique	NA	NA	SPT52856	NA	South East Africa	East Africa	AFRICA	TRUE	uncallable	uncallable	uncallable	uncallable	ERR4661619	NA	53.2734	TRUE
Mozambique	NA	NA	SPT52849	NA	South East Africa	East Africa	AFRICA	TRUE	uncallable	uncallable	uncallable	uncallable	ERR4661620	NA	13.5346	TRUE
Mozambique	NA	NA	SPT52855	NA	South East Africa	East Africa	AFRICA	TRUE	uncallable	uncallable	uncallable	uncallable	ERR4661621	NA	21.7575	TRUE
Mozambique	NA	NA	SPT52854	NA	South East Africa	East Africa	AFRICA	TRUE	uncallable	uncallable	uncallable	uncallable	ERR4661622	NA	102.95	TRUE
Mozambique	NA	NA	SPT52852	NA	South East Africa	East Africa	AFRICA	TRUE	uncallable	uncallable	uncallable	uncallable	ERR4661623	NA	33.4765	TRUE
Mozambique	NA	NA	SPT52834	NA	South East Africa	East Africa	AFRICA	TRUE	uncallable	uncallable	uncallable	uncallable	ERR4661624	NA	28.8886	TRUE
Mozambique	NA	NA	SPT52840	NA	South East Africa	East Africa	AFRICA	TRUE	uncallable	uncallable	uncallable	uncallable	ERR4661625	NA	30.6963	TRUE
Mozambique	NA	NA	SPT52835	NA	South East Africa	East Africa	AFRICA	TRUE	uncallable	uncallable	uncallable	uncallable	ERR4661626	NA	70.805	TRUE
Mozambique	NA	NA	SPT52838	NA	South East Africa	East Africa	AFRICA	TRUE	uncallable	uncallable	uncallable	uncallable	ERR4661627	NA	1.69888	TRUE
Mozambique	NA	NA	SPT52839	NA	South East Africa	East Africa	AFRICA	TRUE	uncallable	uncallable	uncallable	uncallable	ERR4661628	NA	8.72394	TRUE
Mozambique	NA	NA	SPT52858	NA	South East Africa	East Africa	AFRICA	TRUE	uncallable	uncallable	uncallable	uncallable	ERR4661629	NA	17.4663	TRUE
Mozambique	NA	NA	SPT52857	NA	South East Africa	East Africa	AFRICA	TRUE	uncallable	uncallable	uncallable	uncallable	ERR4661630	NA	57.6122	TRUE
Mozambique	NA	NA	SPT52864	NA	South East Africa	East Africa	AFRICA	TRUE	uncallable	uncallable	uncallable	uncallable	ERR4661631	NA	32.9694	TRUE
Mozambique	NA	NA	SPT52861	NA	South East Africa	East Africa	AFRICA	TRUE	uncallable	uncallable	uncallable	uncallable	ERR4661632	NA	33.5506	TRUE
Mozambique	NA	NA	SPT52794	NA	South East Africa	East Africa	AFRICA	TRUE	uncallable	uncallable	uncallable	uncallable	ERR4661633	NA	10.3837	TRUE
Mozambique	NA	NA	SPT52797	NA	South East Africa	East Africa	AFRICA	TRUE	uncallable	uncallable	uncallable	uncallable	ERR4661634	NA	32.6528	TRUE
Mozambique	NA	NA	SPT52799	NA	South East Africa	East Africa	AFRICA	TRUE	uncallable	uncallable	uncallable	uncallable	ERR4661635	NA	6.35263	TRUE
Mozambique	NA	NA	SPT52800	NA	South East Africa	East Africa	AFRICA	TRUE	uncallable	uncallable	uncallable	uncallable	ERR4661636	NA	52.2775	TRUE
Mozambique	NA	NA	SPT52806	NA	South East Africa	East Africa	AFRICA	TRUE	uncallable	uncallable	uncallable	uncallable	ERR4661637	NA	18.0328	TRUE
Mozambique	NA	NA	SPT52802	NA	South East Africa	East Africa	AFRICA	TRUE	uncallable	uncallable	uncallable	uncallable	ERR4661638	NA	6.98899	TRUE
Mozambique	NA	NA	SPT52803	NA	South East Africa	East Africa	AFRICA	TRUE	uncallable	uncallable	uncallable	uncallable	ERR4661639	NA	4.7866	TRUE
Mozambique	NA	NA	SPT53129	NA	South East Africa	East Africa	AFRICA	TRUE	uncallable	uncallable	uncallable	uncallable	ERR4677382	NA	140.099	TRUE
Mozambique	NA	NA	SPT53127	NA	South East Africa	East Africa	AFRICA	TRUE	uncallable	uncallable	uncallable	uncallable	ERR4677383	NA	127.927	TRUE
Mozambique	NA	NA	SPT53125	NA	South East Africa	East Africa	AFRICA	TRUE	uncallable	uncallable	uncallable	uncallable	ERR4677384	NA	116.498	TRUE
Mozambique	NA	NA	SPT53126	NA	South East Africa	East Africa	AFRICA	TRUE	uncallable	uncallable	uncallable	uncallable	ERR4677385	NA	115.525	TRUE
Mozambique	NA	NA	SPT53124	NA	South East Africa	East Africa	AFRICA	TRUE	uncallable	uncallable	uncallable	uncallable	ERR4677386	NA	59.7393	TRUE
Mozambique	NA	NA	SPT53139	NA	South East Africa	East Africa	AFRICA	TRUE	uncallable	uncallable	uncallable	uncallable	ERR4677387	NA	135.455	TRUE
Mozambique	NA	NA	SPT53142	NA	South East Africa	East Africa	AFRICA	TRUE	uncallable	uncallable	uncallable	uncallable	ERR4677388	NA	106.276	TRUE
Mozambique	NA	NA	SPT53141	NA	South East Africa	East Africa	AFRICA	TRUE	uncallable	uncallable	uncallable	uncallable	ERR4677389	NA	93.0877	TRUE
Mozambique	NA	NA	SPT53144	NA	South East Africa	East Africa	AFRICA	TRUE	uncallable	uncallable	uncallable	uncallable	ERR4677390	NA	1.85294	TRUE
Mozambique	NA	NA	SPT53146	NA	South East Africa	East Africa	AFRICA	TRUE	uncallable	uncallable	uncallable	uncallable	ERR4677391	NA	48.2263	TRUE
Mozambique	NA	NA	SPT53145	NA	South East Africa	East Africa	AFRICA	TRUE	uncallable	uncallable	uncallable	uncallable	ERR4677392	NA	121.201	TRUE
Mozambique	NA	NA	SPT53143	NA	South East Africa	East Africa	AFRICA	TRUE	uncallable	uncallable	uncallable	uncallable	ERR4677393	NA	62.3243	TRUE
Mozambique	NA	NA	SPT53097	NA	South East Africa	East Africa	AFRICA	TRUE	uncallable	uncallable	uncallable	uncallable	ERR4677394	NA	49.4607	TRUE
Mozambique	NA	NA	SPT53098	NA	South East Africa	East Africa	AFRICA	TRUE	uncallable	uncallable	uncallable	uncallable	ERR4677395	NA	63.6356	TRUE
Mozambique	NA	NA	SPT53095	NA	South East Africa	East Africa	AFRICA	TRUE	uncallable	uncallable	uncallable	uncallable	ERR4677396	NA	105.908	TRUE
Mozambique	NA	NA	SPT53093	NA	South East Africa	East Africa	AFRICA	TRUE	uncallable	uncallable	uncallable	uncallable	ERR4677397	NA	56.4528	TRUE
Mozambique	NA	NA	SPT53091	NA	South East Africa	East Africa	AFRICA	TRUE	uncallable	uncallable	uncallable	uncallable	ERR4677398	NA	197.573	TRUE
Mozambique	NA	NA	SPT53094	NA	South East Africa	East Africa	AFRICA	TRUE	uncallable	uncallable	uncallable	uncallable	ERR4677399	NA	182.381	TRUE
Mozambique	NA	NA	SPT53092	NA	South East Africa	East Africa	AFRICA	TRUE	uncallable	uncallable	uncallable	uncallable	ERR4677400	NA	70.5016	TRUE
Mozambique	NA	NA	SPT53065	NA	South East Africa	East Africa	AFRICA	TRUE	uncallable	uncallable	uncallable	uncallable	ERR4677401	NA	19.0831	TRUE
Mozambique	NA	NA	SPT53066	NA	South East Africa	East Africa	AFRICA	TRUE	uncallable	uncallable	uncallable	uncallable	ERR4677402	NA	50.7895	TRUE
Mozambique	NA	NA	SPT53062	NA	South East Africa	East Africa	AFRICA	TRUE	uncallable	uncallable	uncallable	uncallable	ERR4677403	NA	18.1221	TRUE
Mozambique	NA	NA	SPT53060	NA	South East Africa	East Africa	AFRICA	TRUE	uncallable	uncallable	uncallable	uncallable	ERR4677404	NA	17.8531	TRUE
Mozambique	NA	NA	SPT53073	NA	South East Africa	East Africa	AFRICA	TRUE	uncallable	uncallable	uncallable	uncallable	ERR4677405	NA	59.1087	TRUE
Mozambique	NA	NA	SPT53074	NA	South East Africa	East Africa	AFRICA	TRUE	uncallable	uncallable	uncallable	uncallable	ERR4677406	NA	19.0514	TRUE
Mozambique	NA	NA	SPT53071	NA	South East Africa	East Africa	AFRICA	TRUE	uncallable	uncallable	uncallable	uncallable	ERR4677407	NA	59.5584	TRUE
Mozambique	NA	NA	SPT53072	NA	South East Africa	East Africa	AFRICA	TRUE	uncallable	uncallable	uncallable	uncallable	ERR4677408	NA	49.0591	TRUE
Mozambique	NA	NA	SPT53069	NA	South East Africa	East Africa	AFRICA	TRUE	uncallable	uncallable	uncallable	uncallable	ERR4677409	NA	5.01078	TRUE
Mozambique	NA	NA	SPT53067	NA	South East Africa	East Africa	AFRICA	TRUE	uncallable	uncallable	uncallable	uncallable	ERR4677410	NA	16.6945	TRUE
Mozambique	NA	NA	SPT53068	NA	South East Africa	East Africa	AFRICA	TRUE	uncallable	uncallable	uncallable	uncallable	ERR4677411	NA	29.5488	TRUE
Mozambique	NA	NA	SPT53137	NA	South East Africa	East Africa	AFRICA	TRUE	uncallable	uncallable	uncallable	uncallable	ERR4677412	NA	82.8612	TRUE
Mozambique	NA	NA	SPT53138	NA	South East Africa	East Africa	AFRICA	TRUE	uncallable	uncallable	uncallable	uncallable	ERR4677413	NA	3.13683	TRUE
Mozambique	NA	NA	SPT53135	NA	South East Africa	East Africa	AFRICA	TRUE	uncallable	uncallable	uncallable	uncallable	ERR4677414	NA	154.087	TRUE
Mozambique	NA	NA	SPT53133	NA	South East Africa	East Africa	AFRICA	TRUE	uncallable	uncallable	uncallable	uncallable	ERR4677415	NA	93.8954	TRUE
Mozambique	NA	NA	SPT53134	NA	South East Africa	East Africa	AFRICA	TRUE	uncallable	uncallable	uncallable	uncallable	ERR4677416	NA	130.939	TRUE
Mozambique	NA	NA	SPT53132	NA	South East Africa	East Africa	AFRICA	TRUE	uncallable	uncallable	uncallable	uncallable	ERR4677417	NA	62.4521	TRUE
Mozambique	NA	NA	SPT53131	NA	South East Africa	East Africa	AFRICA	TRUE	uncallable	uncallable	uncallable	uncallable	ERR4677418	NA	122.933	TRUE
Mozambique	NA	NA	SPT53089	NA	South East Africa	East Africa	AFRICA	TRUE	uncallable	uncallable	uncallable	uncallable	ERR4677419	NA	160.067	TRUE
Mozambique	NA	NA	SPT53090	NA	South East Africa	East Africa	AFRICA	TRUE	uncallable	uncallable	uncallable	uncallable	ERR4677420	NA	144.686	TRUE
Mozambique	NA	NA	SPT53087	NA	South East Africa	East Africa	AFRICA	TRUE	uncallable	uncallable	uncallable	uncallable	ERR4677421	NA	109.103	TRUE
Mozambique	NA	NA	SPT53085	NA	South East Africa	East Africa	AFRICA	TRUE	uncallable	uncallable	uncallable	uncallable	ERR4677422	NA	19.5189	TRUE
Mozambique	NA	NA	SPT53086	NA	South East Africa	East Africa	AFRICA	TRUE	uncallable	uncallable	uncallable	uncallable	ERR4677423	NA	156.537	TRUE
Mozambique	NA	NA	SPT53083	NA	South East Africa	East Africa	AFRICA	TRUE	uncallable	uncallable	uncallable	uncallable	ERR4677424	NA	59.9882	TRUE
Mozambique	NA	NA	SPT53106	NA	South East Africa	East Africa	AFRICA	TRUE	uncallable	uncallable	uncallable	uncallable	ERR4677425	NA	49.9476	TRUE
Mozambique	NA	NA	SPT53099	NA	South East Africa	East Africa	AFRICA	TRUE	uncallable	uncallable	uncallable	uncallable	ERR4677426	NA	53.9451	TRUE
Mozambique	NA	NA	SPT53101	NA	South East Africa	East Africa	AFRICA	TRUE	uncallable	uncallable	uncallable	uncallable	ERR4677427	NA	41.7476	TRUE
Mozambique	NA	NA	SPT53100	NA	South East Africa	East Africa	AFRICA	TRUE	uncallable	uncallable	uncallable	uncallable	ERR4677428	NA	101.58	TRUE
Mozambique	NA	NA	SPT53103	NA	South East Africa	East Africa	AFRICA	TRUE	uncallable	uncallable	uncallable	uncallable	ERR4677429	NA	2.95292	TRUE
Mozambique	NA	NA	SPT53102	NA	South East Africa	East Africa	AFRICA	TRUE	uncallable	uncallable	uncallable	uncallable	ERR4677430	NA	1.73634	TRUE
Mozambique	NA	NA	SPT53104	NA	South East Africa	East Africa	AFRICA	TRUE	uncallable	uncallable	uncallable	uncallable	ERR4677431	NA	85.7877	TRUE
Mozambique	NA	NA	SPT53105	NA	South East Africa	East Africa	AFRICA	TRUE	uncallable	uncallable	uncallable	uncallable	ERR4677432	NA	93.2722	TRUE
Mozambique	NA	NA	SPT53149	NA	South East Africa	East Africa	AFRICA	TRUE	uncallable	uncallable	uncallable	uncallable	ERR4677433	NA	79.1688	TRUE
Mozambique	NA	NA	SPT53150	NA	South East Africa	East Africa	AFRICA	TRUE	uncallable	uncallable	uncallable	uncallable	ERR4677434	NA	90.7862	TRUE
Mozambique	NA	NA	SPT53147	NA	South East Africa	East Africa	AFRICA	TRUE	uncallable	uncallable	uncallable	uncallable	ERR4677435	NA	98.0838	TRUE
Mozambique	NA	NA	SPT53148	NA	South East Africa	East Africa	AFRICA	TRUE	uncallable	uncallable	uncallable	uncallable	ERR4677436	NA	13.7512	TRUE
Mozambique	NA	NA	SPT53190	NA	South East Africa	East Africa	AFRICA	TRUE	uncallable	uncallable	uncallable	uncallable	ERR4677437	NA	137.462	TRUE
Mozambique	NA	NA	SPT53191	NA	South East Africa	East Africa	AFRICA	TRUE	uncallable	uncallable	uncallable	uncallable	ERR4677438	NA	91.0001	TRUE
Mozambique	NA	NA	SPT53189	NA	South East Africa	East Africa	AFRICA	TRUE	uncallable	uncallable	uncallable	uncallable	ERR4677439	NA	114.195	TRUE
Mozambique	NA	NA	SPT53188	NA	South East Africa	East Africa	AFRICA	TRUE	uncallable	uncallable	uncallable	uncallable	ERR4677440	NA	27.3678	TRUE
Mozambique	NA	NA	SPT53186	NA	South East Africa	East Africa	AFRICA	TRUE	uncallable	uncallable	uncallable	uncallable	ERR4677441	NA	105.719	TRUE
Mozambique	NA	NA	SPT53187	NA	South East Africa	East Africa	AFRICA	TRUE	uncallable	uncallable	uncallable	uncallable	ERR4677442	NA	9.10358	TRUE
Mozambique	NA	NA	SPT53185	NA	South East Africa	East Africa	AFRICA	TRUE	uncallable	uncallable	uncallable	uncallable	ERR4677443	NA	43.7906	TRUE
Mozambique	NA	NA	SPT53192	NA	South East Africa	East Africa	AFRICA	TRUE	uncallable	uncallable	uncallable	uncallable	ERR4677444	NA	146.902	TRUE
Mozambique	NA	NA	SPT53176	NA	South East Africa	East Africa	AFRICA	TRUE	uncallable	uncallable	uncallable	uncallable	ERR4677445	NA	58.6092	TRUE
Mozambique	NA	NA	SPT53173	NA	South East Africa	East Africa	AFRICA	TRUE	uncallable	uncallable	uncallable	uncallable	ERR4677446	NA	64.011	TRUE
Mozambique	NA	NA	SPT53174	NA	South East Africa	East Africa	AFRICA	TRUE	uncallable	uncallable	uncallable	uncallable	ERR4677447	NA	126.733	TRUE
Mozambique	NA	NA	SPT53171	NA	South East Africa	East Africa	AFRICA	TRUE	uncallable	uncallable	uncallable	uncallable	ERR4677448	NA	48.782	TRUE
Mozambique	NA	NA	SPT53169	NA	South East Africa	East Africa	AFRICA	TRUE	uncallable	uncallable	uncallable	uncallable	ERR4677449	NA	16.7777	TRUE
Mozambique	NA	NA	SPT53211	NA	South East Africa	East Africa	AFRICA	TRUE	uncallable	uncallable	uncallable	uncallable	ERR4677450	NA	12.8546	TRUE
Mozambique	NA	NA	SPT53209	NA	South East Africa	East Africa	AFRICA	TRUE	uncallable	uncallable	uncallable	uncallable	ERR4677451	NA	80.266	TRUE
Mozambique	NA	NA	SPT53165	NA	South East Africa	East Africa	AFRICA	TRUE	uncallable	uncallable	uncallable	uncallable	ERR4677452	NA	23.1243	TRUE
Mozambique	NA	NA	SPT53166	NA	South East Africa	East Africa	AFRICA	TRUE	uncallable	uncallable	uncallable	uncallable	ERR4677453	NA	40.714	TRUE
Mozambique	NA	NA	SPT53164	NA	South East Africa	East Africa	AFRICA	TRUE	uncallable	uncallable	uncallable	uncallable	ERR4677454	NA	72.14	TRUE
Mozambique	NA	NA	SPT53161	NA	South East Africa	East Africa	AFRICA	TRUE	uncallable	uncallable	uncallable	uncallable	ERR4677455	NA	58.5804	TRUE
Mozambique	NA	NA	SPT53162	NA	South East Africa	East Africa	AFRICA	TRUE	uncallable	uncallable	uncallable	uncallable	ERR4677456	NA	49.4554	TRUE
Mozambique	NA	NA	SPT53160	NA	South East Africa	East Africa	AFRICA	TRUE	uncallable	uncallable	uncallable	uncallable	ERR4677457	NA	18.5197	TRUE
Mozambique	NA	NA	SPT53159	NA	South East Africa	East Africa	AFRICA	TRUE	uncallable	uncallable	uncallable	uncallable	ERR4677458	NA	32.1966	TRUE
Mozambique	NA	NA	SPT53155	NA	South East Africa	East Africa	AFRICA	TRUE	uncallable	uncallable	uncallable	uncallable	ERR4677459	NA	41.0311	TRUE
Mozambique	NA	NA	SPT53154	NA	South East Africa	East Africa	AFRICA	TRUE	uncallable	uncallable	uncallable	uncallable	ERR4677460	NA	41.3321	TRUE
Mozambique	NA	NA	SPT53183	NA	South East Africa	East Africa	AFRICA	TRUE	uncallable	uncallable	uncallable	uncallable	ERR4677461	NA	28.7122	TRUE
Mozambique	NA	NA	SPT53182	NA	South East Africa	East Africa	AFRICA	TRUE	uncallable	uncallable	uncallable	uncallable	ERR4677462	NA	80.9013	TRUE
Mozambique	NA	NA	SPT53179	NA	South East Africa	East Africa	AFRICA	TRUE	uncallable	uncallable	uncallable	uncallable	ERR4677463	NA	17.6216	TRUE
Mozambique	NA	NA	SPT53178	NA	South East Africa	East Africa	AFRICA	TRUE	uncallable	uncallable	uncallable	uncallable	ERR4677464	NA	27.844	TRUE
Mozambique	NA	NA	SPT53197	NA	South East Africa	East Africa	AFRICA	TRUE	uncallable	uncallable	uncallable	uncallable	ERR4677465	NA	17.9271	TRUE
Mozambique	NA	NA	SPT53196	NA	South East Africa	East Africa	AFRICA	TRUE	uncallable	uncallable	uncallable	uncallable	ERR4677466	NA	12.7227	TRUE
Mozambique	NA	NA	SPT53195	NA	South East Africa	East Africa	AFRICA	TRUE	uncallable	uncallable	uncallable	uncallable	ERR4677467	NA	29.2732	TRUE
Mozambique	NA	NA	SPT53194	NA	South East Africa	East Africa	AFRICA	TRUE	uncallable	uncallable	uncallable	uncallable	ERR4677468	NA	18.3904	TRUE
Mozambique	NA	NA	SPT53223	NA	South East Africa	East Africa	AFRICA	TRUE	uncallable	uncallable	uncallable	uncallable	ERR4677469	NA	25.2841	TRUE
Mozambique	NA	NA	SPT53221	NA	South East Africa	East Africa	AFRICA	TRUE	uncallable	uncallable	uncallable	uncallable	ERR4677470	NA	28.5716	TRUE
Mozambique	NA	NA	SPT53219	NA	South East Africa	East Africa	AFRICA	TRUE	uncallable	uncallable	uncallable	uncallable	ERR4677471	NA	11.5534	TRUE
Mozambique	NA	NA	SPT53201	NA	South East Africa	East Africa	AFRICA	TRUE	uncallable	uncallable	uncallable	uncallable	ERR4677472	NA	49.5124	TRUE
Mozambique	NA	NA	SPT53203	NA	South East Africa	East Africa	AFRICA	TRUE	uncallable	uncallable	uncallable	uncallable	ERR4677473	NA	13.6559	TRUE
Mozambique	NA	NA	SPT53208	NA	South East Africa	East Africa	AFRICA	TRUE	uncallable	uncallable	uncallable	uncallable	ERR4677474	NA	26.7369	TRUE
Mozambique	NA	NA	SPT53233	NA	South East Africa	East Africa	AFRICA	TRUE	uncallable	uncallable	uncallable	uncallable	ERR4677475	NA	35.0987	TRUE
Mozambique	NA	NA	SPT53235	NA	South East Africa	East Africa	AFRICA	TRUE	uncallable	uncallable	uncallable	uncallable	ERR4677476	NA	27.6141	TRUE
Mozambique	NA	NA	SPT53239	NA	South East Africa	East Africa	AFRICA	TRUE	uncallable	uncallable	uncallable	uncallable	ERR4677477	NA	5.03795	TRUE
Mozambique	NA	NA	SPT51092	NA	South East Africa	East Africa	AFRICA	TRUE	uncallable	uncallable	uncallable	uncallable	ERR4677478	NA	42.8936	TRUE
Mozambique	NA	NA	SPT51093	NA	South East Africa	East Africa	AFRICA	TRUE	uncallable	uncallable	uncallable	uncallable	ERR4677479	NA	6.77628	TRUE
Mozambique	NA	NA	SPT51059	NA	South East Africa	East Africa	AFRICA	TRUE	uncallable	uncallable	uncallable	uncallable	ERR4677480	NA	4.72435	TRUE
Mozambique	NA	NA	SPT51058	NA	South East Africa	East Africa	AFRICA	TRUE	uncallable	uncallable	uncallable	uncallable	ERR4677481	NA	32.1329	TRUE
Mozambique	NA	NA	SPT51056	NA	South East Africa	East Africa	AFRICA	TRUE	uncallable	uncallable	uncallable	uncallable	ERR4677482	NA	24.7527	TRUE
Mozambique	NA	NA	SPT51057	NA	South East Africa	East Africa	AFRICA	TRUE	uncallable	uncallable	uncallable	uncallable	ERR4677483	NA	7.61641	TRUE
Mozambique	NA	NA	SPT51107	NA	South East Africa	East Africa	AFRICA	TRUE	uncallable	uncallable	uncallable	uncallable	ERR4677484	NA	12.0083	TRUE
Mozambique	NA	NA	SPT51104	NA	South East Africa	East Africa	AFRICA	TRUE	uncallable	uncallable	uncallable	uncallable	ERR4677485	NA	47.4697	TRUE
Mozambique	NA	NA	SPT51105	NA	South East Africa	East Africa	AFRICA	TRUE	uncallable	uncallable	uncallable	uncallable	ERR4677486	NA	51.0913	TRUE
Mozambique	NA	NA	SPT51102	NA	South East Africa	East Africa	AFRICA	TRUE	uncallable	uncallable	uncallable	uncallable	ERR4677487	NA	3.37669	TRUE
Mozambique	NA	NA	SPT51103	NA	South East Africa	East Africa	AFRICA	TRUE	uncallable	uncallable	uncallable	uncallable	ERR4677488	NA	23.1328	TRUE
Mozambique	NA	NA	SPT51101	NA	South East Africa	East Africa	AFRICA	TRUE	uncallable	uncallable	uncallable	uncallable	ERR4677489	NA	29.2698	TRUE
Mozambique	NA	NA	SPT51100	NA	South East Africa	East Africa	AFRICA	TRUE	uncallable	uncallable	uncallable	uncallable	ERR4677490	NA	56.0857	TRUE
Mozambique	NA	NA	SPT51117	NA	South East Africa	East Africa	AFRICA	TRUE	uncallable	uncallable	uncallable	uncallable	ERR4677491	NA	37.2894	TRUE
Mozambique	NA	NA	SPT51121	NA	South East Africa	East Africa	AFRICA	TRUE	uncallable	uncallable	uncallable	uncallable	ERR4677492	NA	34.3611	TRUE
Mozambique	NA	NA	SPT51091	NA	South East Africa	East Africa	AFRICA	TRUE	uncallable	uncallable	uncallable	uncallable	ERR4677493	NA	15.9025	TRUE
Mozambique	NA	NA	SPT51088	NA	South East Africa	East Africa	AFRICA	TRUE	uncallable	uncallable	uncallable	uncallable	ERR4677494	NA	54.5827	TRUE
Mozambique	NA	NA	SPT51087	NA	South East Africa	East Africa	AFRICA	TRUE	uncallable	uncallable	uncallable	uncallable	ERR4677495	NA	15.2136	TRUE
Mozambique	NA	NA	SPT51089	NA	South East Africa	East Africa	AFRICA	TRUE	uncallable	uncallable	uncallable	uncallable	ERR4677496	NA	25.0281	TRUE
Mozambique	NA	NA	SPT51085	NA	South East Africa	East Africa	AFRICA	TRUE	uncallable	uncallable	uncallable	uncallable	ERR4677497	NA	185.23	TRUE
Mozambique	NA	NA	SPT51083	NA	South East Africa	East Africa	AFRICA	TRUE	uncallable	uncallable	uncallable	uncallable	ERR4677498	NA	66.457	TRUE
Mozambique	NA	NA	SPT51084	NA	South East Africa	East Africa	AFRICA	TRUE	uncallable	uncallable	uncallable	uncallable	ERR4677499	NA	17.0448	TRUE
Mozambique	NA	NA	SPT51081	NA	South East Africa	East Africa	AFRICA	TRUE	uncallable	uncallable	uncallable	uncallable	ERR4677500	NA	54.2849	TRUE
Mozambique	NA	NA	SPT51076	NA	South East Africa	East Africa	AFRICA	TRUE	uncallable	uncallable	uncallable	uncallable	ERR4677501	NA	31.1299	TRUE
Mozambique	NA	NA	SPT51042	NA	South East Africa	East Africa	AFRICA	TRUE	uncallable	uncallable	uncallable	uncallable	ERR4677502	NA	73.219	TRUE
Mozambique	NA	NA	SPT51021	NA	South East Africa	East Africa	AFRICA	TRUE	uncallable	uncallable	uncallable	uncallable	ERR4677503	NA	26.9145	TRUE
Mozambique	NA	NA	SPT51019	NA	South East Africa	East Africa	AFRICA	TRUE	uncallable	uncallable	uncallable	uncallable	ERR4677504	NA	110.544	TRUE
Mozambique	NA	NA	SPT51018	NA	South East Africa	East Africa	AFRICA	TRUE	uncallable	uncallable	uncallable	uncallable	ERR4677505	NA	56.9391	TRUE
Mozambique	NA	NA	SPT51014	NA	South East Africa	East Africa	AFRICA	TRUE	uncallable	uncallable	uncallable	uncallable	ERR4677506	NA	51.6021	TRUE
Mozambique	NA	NA	SPT51017	NA	South East Africa	East Africa	AFRICA	TRUE	uncallable	uncallable	uncallable	uncallable	ERR4677507	NA	25.9277	TRUE
Mozambique	NA	NA	SPT50965	NA	South East Africa	East Africa	AFRICA	TRUE	uncallable	uncallable	uncallable	uncallable	ERR4677508	NA	10.4072	TRUE
Mozambique	NA	NA	SPT50960	NA	South East Africa	East Africa	AFRICA	TRUE	uncallable	uncallable	uncallable	uncallable	ERR4677509	NA	100.225	TRUE
Mozambique	NA	NA	SPT50962	NA	South East Africa	East Africa	AFRICA	TRUE	uncallable	uncallable	uncallable	uncallable	ERR4677510	NA	90.4433	TRUE
Mozambique	NA	NA	SPT50958	NA	South East Africa	East Africa	AFRICA	TRUE	uncallable	uncallable	uncallable	uncallable	ERR4677511	NA	43.0233	TRUE
Mozambique	NA	NA	SPT50959	NA	South East Africa	East Africa	AFRICA	TRUE	uncallable	uncallable	uncallable	uncallable	ERR4677512	NA	151.712	TRUE
Mozambique	NA	NA	SPT51010	NA	South East Africa	East Africa	AFRICA	TRUE	uncallable	uncallable	uncallable	uncallable	ERR4677513	NA	39.8585	TRUE
Mozambique	NA	NA	SPT51011	NA	South East Africa	East Africa	AFRICA	TRUE	uncallable	uncallable	uncallable	uncallable	ERR4677514	NA	43.582	TRUE
Mozambique	NA	NA	SPT51009	NA	South East Africa	East Africa	AFRICA	TRUE	uncallable	uncallable	uncallable	uncallable	ERR4677515	NA	42.7681	TRUE
Mozambique	NA	NA	SPT51006	NA	South East Africa	East Africa	AFRICA	TRUE	uncallable	uncallable	uncallable	uncallable	ERR4677516	NA	95.4069	TRUE
Mozambique	NA	NA	SPT51007	NA	South East Africa	East Africa	AFRICA	TRUE	uncallable	uncallable	uncallable	uncallable	ERR4677517	NA	10.5193	TRUE
Mozambique	NA	NA	SPT51005	NA	South East Africa	East Africa	AFRICA	TRUE	uncallable	uncallable	uncallable	uncallable	ERR4677518	NA	47.3018	TRUE
Mozambique	NA	NA	SPT51004	NA	South East Africa	East Africa	AFRICA	TRUE	uncallable	uncallable	uncallable	uncallable	ERR4677519	NA	70.9925	TRUE
Mozambique	NA	NA	SPT51001	NA	South East Africa	East Africa	AFRICA	TRUE	uncallable	uncallable	uncallable	uncallable	ERR4677520	NA	23.6271	TRUE
Mozambique	NA	NA	SPT50986	NA	South East Africa	East Africa	AFRICA	TRUE	uncallable	uncallable	uncallable	uncallable	ERR4677521	NA	28.3228	TRUE
Mozambique	NA	NA	SPT50984	NA	South East Africa	East Africa	AFRICA	TRUE	uncallable	uncallable	uncallable	uncallable	ERR4677522	NA	108.148	TRUE
Mozambique	NA	NA	SPT50985	NA	South East Africa	East Africa	AFRICA	TRUE	uncallable	uncallable	uncallable	uncallable	ERR4677523	NA	68.5557	TRUE
Mozambique	NA	NA	SPT50991	NA	South East Africa	East Africa	AFRICA	TRUE	uncallable	uncallable	uncallable	uncallable	ERR4677524	NA	55.6577	TRUE
Mozambique	NA	NA	SPT50993	NA	South East Africa	East Africa	AFRICA	TRUE	uncallable	uncallable	uncallable	uncallable	ERR4677525	NA	33.365	TRUE
Mozambique	NA	NA	SPT51296	NA	South East Africa	East Africa	AFRICA	TRUE	uncallable	uncallable	uncallable	uncallable	ERR4677526	NA	26.6414	TRUE
Mozambique	NA	NA	SPT51298	NA	South East Africa	East Africa	AFRICA	TRUE	uncallable	uncallable	uncallable	uncallable	ERR4677527	NA	62.0092	TRUE
Mozambique	NA	NA	SPT51302	NA	South East Africa	East Africa	AFRICA	TRUE	uncallable	uncallable	uncallable	uncallable	ERR4677528	NA	49.1832	TRUE
Mozambique	NA	NA	SPT51305	NA	South East Africa	East Africa	AFRICA	TRUE	uncallable	uncallable	uncallable	uncallable	ERR4677529	NA	121.739	TRUE
Mozambique	NA	NA	SPT51306	NA	South East Africa	East Africa	AFRICA	TRUE	uncallable	uncallable	uncallable	uncallable	ERR4677530	NA	132.872	TRUE
Mozambique	NA	NA	SPT51307	NA	South East Africa	East Africa	AFRICA	TRUE	uncallable	uncallable	uncallable	uncallable	ERR4677531	NA	46.8081	TRUE
Mozambique	NA	NA	SPT51308	NA	South East Africa	East Africa	AFRICA	TRUE	uncallable	uncallable	uncallable	uncallable	ERR4677532	NA	76.9097	TRUE
Mozambique	NA	NA	SPT51309	NA	South East Africa	East Africa	AFRICA	TRUE	uncallable	uncallable	uncallable	uncallable	ERR4677533	NA	118.877	TRUE
Mozambique	NA	NA	SPT51310	NA	South East Africa	East Africa	AFRICA	TRUE	uncallable	uncallable	uncallable	uncallable	ERR4677534	NA	65.2552	TRUE
Mozambique	NA	NA	SPT51258	NA	South East Africa	East Africa	AFRICA	TRUE	uncallable	uncallable	uncallable	uncallable	ERR4677535	NA	95.6668	TRUE
Mozambique	NA	NA	SPT51261	NA	South East Africa	East Africa	AFRICA	TRUE	uncallable	uncallable	uncallable	uncallable	ERR4677536	NA	13.9633	TRUE
Mozambique	NA	NA	SPT51262	NA	South East Africa	East Africa	AFRICA	TRUE	uncallable	uncallable	uncallable	uncallable	ERR4677537	NA	95.2785	TRUE
Mozambique	NA	NA	SPT51295	NA	South East Africa	East Africa	AFRICA	TRUE	uncallable	uncallable	uncallable	uncallable	ERR4677538	NA	10.5252	TRUE
Mozambique	NA	NA	SPT51292	NA	South East Africa	East Africa	AFRICA	TRUE	uncallable	uncallable	uncallable	uncallable	ERR4677539	NA	20.2844	TRUE
Mozambique	NA	NA	SPT51291	NA	South East Africa	East Africa	AFRICA	TRUE	uncallable	uncallable	uncallable	uncallable	ERR4677540	NA	11.7395	TRUE
Mozambique	NA	NA	SPT51288	NA	South East Africa	East Africa	AFRICA	TRUE	uncallable	uncallable	uncallable	uncallable	ERR4677541	NA	109.947	TRUE
Mozambique	NA	NA	SPT51249	NA	South East Africa	East Africa	AFRICA	TRUE	uncallable	uncallable	uncallable	uncallable	ERR4677542	NA	76.9049	TRUE
Mozambique	NA	NA	SPT51248	NA	South East Africa	East Africa	AFRICA	TRUE	uncallable	uncallable	uncallable	uncallable	ERR4677543	NA	4.76123	TRUE
Mozambique	NA	NA	SPT51253	NA	South East Africa	East Africa	AFRICA	TRUE	uncallable	uncallable	uncallable	uncallable	ERR4677544	NA	67.7629	TRUE
Mozambique	NA	NA	SPT51329	NA	South East Africa	East Africa	AFRICA	TRUE	uncallable	uncallable	uncallable	uncallable	ERR4677545	NA	66.9404	TRUE
Mozambique	NA	NA	SPT51328	NA	South East Africa	East Africa	AFRICA	TRUE	uncallable	uncallable	uncallable	uncallable	ERR4677546	NA	60.5905	TRUE
Mozambique	NA	NA	SPT51332	NA	South East Africa	East Africa	AFRICA	TRUE	uncallable	uncallable	uncallable	uncallable	ERR4677547	NA	26.2655	TRUE
Mozambique	NA	NA	SPT51357	NA	South East Africa	East Africa	AFRICA	TRUE	uncallable	uncallable	uncallable	uncallable	ERR4677548	NA	84.5753	TRUE
Mozambique	NA	NA	SPT51354	NA	South East Africa	East Africa	AFRICA	TRUE	uncallable	uncallable	uncallable	uncallable	ERR4677549	NA	39.1456	TRUE
Mozambique	NA	NA	SPT51490	NA	South East Africa	East Africa	AFRICA	TRUE	uncallable	uncallable	uncallable	uncallable	ERR4677550	NA	4.55548	TRUE
Mozambique	NA	NA	SPT51429	NA	South East Africa	East Africa	AFRICA	TRUE	uncallable	uncallable	uncallable	uncallable	ERR4677551	NA	37.1666	TRUE
Mozambique	NA	NA	SPT51428	NA	South East Africa	East Africa	AFRICA	TRUE	uncallable	uncallable	uncallable	uncallable	ERR4677552	NA	107.866	TRUE
Mozambique	NA	NA	SPT51431	NA	South East Africa	East Africa	AFRICA	TRUE	uncallable	uncallable	uncallable	uncallable	ERR4677553	NA	42.919	TRUE
Mozambique	NA	NA	SPT51433	NA	South East Africa	East Africa	AFRICA	TRUE	uncallable	uncallable	uncallable	uncallable	ERR4677554	NA	53.6183	TRUE
Mozambique	NA	NA	SPT51430	NA	South East Africa	East Africa	AFRICA	TRUE	uncallable	uncallable	uncallable	uncallable	ERR4677555	NA	128.479	TRUE
Mozambique	NA	NA	SPT51432	NA	South East Africa	East Africa	AFRICA	TRUE	uncallable	uncallable	uncallable	uncallable	ERR4677556	NA	21.7167	TRUE
Mozambique	NA	NA	SPT51512	NA	South East Africa	East Africa	AFRICA	TRUE	uncallable	uncallable	uncallable	uncallable	ERR4677557	NA	18.4976	TRUE
Mozambique	NA	NA	SPT51510	NA	South East Africa	East Africa	AFRICA	TRUE	uncallable	uncallable	uncallable	uncallable	ERR4677558	NA	83.2992	TRUE
Mozambique	NA	NA	SPT51511	NA	South East Africa	East Africa	AFRICA	TRUE	uncallable	uncallable	uncallable	uncallable	ERR4677559	NA	96.6928	TRUE
Mozambique	NA	NA	SPT51440	NA	South East Africa	East Africa	AFRICA	TRUE	uncallable	uncallable	uncallable	uncallable	ERR4677560	NA	13.8593	TRUE
Mozambique	NA	NA	SPT51442	NA	South East Africa	East Africa	AFRICA	TRUE	uncallable	uncallable	uncallable	uncallable	ERR4677561	NA	188.527	TRUE
Mozambique	NA	NA	SPT51493	NA	South East Africa	East Africa	AFRICA	TRUE	uncallable	uncallable	uncallable	uncallable	ERR4677562	NA	7.75005	TRUE
Mozambique	NA	NA	SPT51492	NA	South East Africa	East Africa	AFRICA	TRUE	uncallable	uncallable	uncallable	uncallable	ERR4677563	NA	45.3064	TRUE
Mozambique	NA	NA	SPT51495	NA	South East Africa	East Africa	AFRICA	TRUE	uncallable	uncallable	uncallable	uncallable	ERR4677564	NA	116.059	TRUE
Mozambique	NA	NA	SPT51494	NA	South East Africa	East Africa	AFRICA	TRUE	uncallable	uncallable	uncallable	uncallable	ERR4677565	NA	32.0586	TRUE
Mozambique	NA	NA	SPT51497	NA	South East Africa	East Africa	AFRICA	TRUE	uncallable	uncallable	uncallable	uncallable	ERR4677566	NA	157.382	TRUE
Mozambique	NA	NA	SPT51496	NA	South East Africa	East Africa	AFRICA	TRUE	uncallable	uncallable	uncallable	uncallable	ERR4677567	NA	25.2635	TRUE
Mozambique	NA	NA	SPT51498	NA	South East Africa	East Africa	AFRICA	TRUE	uncallable	uncallable	uncallable	uncallable	ERR4677568	NA	10.5049	TRUE
Mozambique	NA	NA	SPT51461	NA	South East Africa	East Africa	AFRICA	TRUE	uncallable	uncallable	uncallable	uncallable	ERR4677569	NA	35.6818	TRUE
Mozambique	NA	NA	SPT51470	NA	South East Africa	East Africa	AFRICA	TRUE	uncallable	uncallable	uncallable	uncallable	ERR4677570	NA	27.3689	TRUE
Mozambique	NA	NA	SPT51468	NA	South East Africa	East Africa	AFRICA	TRUE	uncallable	uncallable	uncallable	uncallable	ERR4677571	NA	9.9478	TRUE
Mozambique	NA	NA	SPT52414	NA	South East Africa	East Africa	AFRICA	TRUE	uncallable	uncallable	uncallable	uncallable	ERR4677572	NA	42.6159	TRUE
Mozambique	NA	NA	SPT52413	NA	South East Africa	East Africa	AFRICA	TRUE	uncallable	uncallable	uncallable	uncallable	ERR4677573	NA	31.1149	TRUE
Mozambique	NA	NA	SPT52412	NA	South East Africa	East Africa	AFRICA	TRUE	uncallable	uncallable	uncallable	uncallable	ERR4677574	NA	24.1713	TRUE
Mozambique	NA	NA	SPT52432	NA	South East Africa	East Africa	AFRICA	TRUE	uncallable	uncallable	uncallable	uncallable	ERR4677575	NA	59.2171	TRUE
Mozambique	NA	NA	SPT52429	NA	South East Africa	East Africa	AFRICA	TRUE	uncallable	uncallable	uncallable	uncallable	ERR4677576	NA	9.34159	TRUE
Mozambique	NA	NA	SPT52427	NA	South East Africa	East Africa	AFRICA	TRUE	uncallable	uncallable	uncallable	uncallable	ERR4677577	NA	5.19859	TRUE
Mozambique	NA	NA	SPT52425	NA	South East Africa	East Africa	AFRICA	TRUE	uncallable	uncallable	uncallable	uncallable	ERR4677578	NA	85.8086	TRUE
Mozambique	NA	NA	SPT52453	NA	South East Africa	East Africa	AFRICA	TRUE	uncallable	uncallable	uncallable	uncallable	ERR4677579	NA	37.0733	TRUE
Mozambique	NA	NA	SPT52452	NA	South East Africa	East Africa	AFRICA	TRUE	uncallable	uncallable	uncallable	uncallable	ERR4677580	NA	64.4246	TRUE
Mozambique	NA	NA	SPT52451	NA	South East Africa	East Africa	AFRICA	TRUE	uncallable	uncallable	uncallable	uncallable	ERR4677581	NA	20.1744	TRUE
Mozambique	NA	NA	SPT52449	NA	South East Africa	East Africa	AFRICA	TRUE	uncallable	uncallable	uncallable	uncallable	ERR4677582	NA	13.3594	TRUE
Mozambique	NA	NA	SPT52450	NA	South East Africa	East Africa	AFRICA	TRUE	uncallable	uncallable	uncallable	uncallable	ERR4677583	NA	45.6596	TRUE
Mozambique	NA	NA	SPT52447	NA	South East Africa	East Africa	AFRICA	TRUE	uncallable	uncallable	uncallable	uncallable	ERR4677584	NA	64.8575	TRUE
Mozambique	NA	NA	SPT52454	NA	South East Africa	East Africa	AFRICA	TRUE	uncallable	uncallable	uncallable	uncallable	ERR4677585	NA	32.6199	TRUE
Mozambique	NA	NA	SPT52464	NA	South East Africa	East Africa	AFRICA	TRUE	uncallable	uncallable	uncallable	uncallable	ERR4677586	NA	17.38	TRUE
Mozambique	NA	NA	SPT52461	NA	South East Africa	East Africa	AFRICA	TRUE	uncallable	uncallable	uncallable	uncallable	ERR4677587	NA	20.9795	TRUE
Mozambique	NA	NA	SPT52462	NA	South East Africa	East Africa	AFRICA	TRUE	uncallable	uncallable	uncallable	uncallable	ERR4677588	NA	24.5269	TRUE
Mozambique	NA	NA	SPT52460	NA	South East Africa	East Africa	AFRICA	TRUE	uncallable	uncallable	uncallable	uncallable	ERR4677589	NA	22.6484	TRUE
Mozambique	NA	NA	SPT52459	NA	South East Africa	East Africa	AFRICA	TRUE	uncallable	uncallable	uncallable	uncallable	ERR4677590	NA	29.2447	TRUE
Mozambique	NA	NA	SPT52458	NA	South East Africa	East Africa	AFRICA	TRUE	uncallable	uncallable	uncallable	uncallable	ERR4677591	NA	31.928	TRUE
Mozambique	NA	NA	SPT52457	NA	South East Africa	East Africa	AFRICA	TRUE	uncallable	uncallable	uncallable	uncallable	ERR4677592	NA	21.1465	TRUE
Mozambique	NA	NA	SPT52487	NA	South East Africa	East Africa	AFRICA	TRUE	uncallable	uncallable	uncallable	uncallable	ERR4677593	NA	19.0733	TRUE
Mozambique	NA	NA	SPT52481	NA	South East Africa	East Africa	AFRICA	TRUE	uncallable	uncallable	uncallable	uncallable	ERR4677594	NA	71.1125	TRUE
Mozambique	NA	NA	SPT52488	NA	South East Africa	East Africa	AFRICA	TRUE	uncallable	uncallable	uncallable	uncallable	ERR4677595	NA	36.5705	TRUE
Mozambique	NA	NA	SPT52502	NA	South East Africa	East Africa	AFRICA	TRUE	uncallable	uncallable	uncallable	uncallable	ERR4677596	NA	25.8039	TRUE
Mozambique	NA	NA	SPT52517	NA	South East Africa	East Africa	AFRICA	TRUE	uncallable	uncallable	uncallable	uncallable	ERR4677597	NA	35.3753	TRUE
Mozambique	NA	NA	SPT52518	NA	South East Africa	East Africa	AFRICA	TRUE	uncallable	uncallable	uncallable	uncallable	ERR4677598	NA	16.713	TRUE
Mozambique	NA	NA	SPT52515	NA	South East Africa	East Africa	AFRICA	TRUE	uncallable	uncallable	uncallable	uncallable	ERR4677599	NA	18.8034	TRUE
Mozambique	NA	NA	SPT52516	NA	South East Africa	East Africa	AFRICA	TRUE	uncallable	uncallable	uncallable	uncallable	ERR4677600	NA	44.0967	TRUE
Mozambique	NA	NA	SPT52513	NA	South East Africa	East Africa	AFRICA	TRUE	uncallable	uncallable	uncallable	uncallable	ERR4677601	NA	22.8398	TRUE
Mozambique	NA	NA	SPT52511	NA	South East Africa	East Africa	AFRICA	TRUE	uncallable	uncallable	uncallable	uncallable	ERR4677602	NA	52.4648	TRUE
Mozambique	NA	NA	SPT52514	NA	South East Africa	East Africa	AFRICA	TRUE	uncallable	uncallable	uncallable	uncallable	ERR4677603	NA	65.3881	TRUE
Mozambique	NA	NA	SPT52512	NA	South East Africa	East Africa	AFRICA	TRUE	uncallable	uncallable	uncallable	uncallable	ERR4677604	NA	85.8571	TRUE
Mozambique	NA	NA	SPT52586	NA	South East Africa	East Africa	AFRICA	TRUE	uncallable	uncallable	uncallable	uncallable	ERR4677605	NA	16.2985	TRUE
Mozambique	NA	NA	SPT52583	NA	South East Africa	East Africa	AFRICA	TRUE	uncallable	uncallable	uncallable	uncallable	ERR4677606	NA	39.8858	TRUE
Mozambique	NA	NA	SPT52588	NA	South East Africa	East Africa	AFRICA	TRUE	uncallable	uncallable	uncallable	uncallable	ERR4677607	NA	15.0681	TRUE
Mozambique	NA	NA	SPT52503	NA	South East Africa	East Africa	AFRICA	TRUE	uncallable	uncallable	uncallable	uncallable	ERR4677608	NA	53.0342	TRUE
Mozambique	NA	NA	SPT52506	NA	South East Africa	East Africa	AFRICA	TRUE	uncallable	uncallable	uncallable	uncallable	ERR4677609	NA	34.9164	TRUE
Mozambique	NA	NA	SPT52505	NA	South East Africa	East Africa	AFRICA	TRUE	uncallable	uncallable	uncallable	uncallable	ERR4677610	NA	22.3411	TRUE
Mozambique	NA	NA	SPT52508	NA	South East Africa	East Africa	AFRICA	TRUE	uncallable	uncallable	uncallable	uncallable	ERR4677611	NA	10.7834	TRUE
Mozambique	NA	NA	SPT52510	NA	South East Africa	East Africa	AFRICA	TRUE	uncallable	uncallable	uncallable	uncallable	ERR4677612	NA	46.2247	TRUE
Mozambique	NA	NA	SPT52507	NA	South East Africa	East Africa	AFRICA	TRUE	uncallable	uncallable	uncallable	uncallable	ERR4677613	NA	37.7184	TRUE
Mozambique	NA	NA	SPT52509	NA	South East Africa	East Africa	AFRICA	TRUE	uncallable	uncallable	uncallable	uncallable	ERR4677614	NA	48.5479	TRUE
Mozambique	NA	NA	SPT52531	NA	South East Africa	East Africa	AFRICA	TRUE	uncallable	uncallable	uncallable	uncallable	ERR4677615	NA	25.0343	TRUE
Mozambique	NA	NA	SPT52532	NA	South East Africa	East Africa	AFRICA	TRUE	uncallable	uncallable	uncallable	uncallable	ERR4677616	NA	10.7745	TRUE
Mozambique	NA	NA	SPT52529	NA	South East Africa	East Africa	AFRICA	TRUE	uncallable	uncallable	uncallable	uncallable	ERR4677617	NA	61.4268	TRUE
Mozambique	NA	NA	SPT52527	NA	South East Africa	East Africa	AFRICA	TRUE	uncallable	uncallable	uncallable	uncallable	ERR4677618	NA	30.2456	TRUE
Mozambique	NA	NA	SPT52520	NA	South East Africa	East Africa	AFRICA	TRUE	uncallable	uncallable	uncallable	uncallable	ERR4677619	NA	43.7245	TRUE
Mozambique	NA	NA	SPT52528	NA	South East Africa	East Africa	AFRICA	TRUE	uncallable	uncallable	uncallable	uncallable	ERR4677620	NA	25.5156	TRUE
Mozambique	NA	NA	SPT52519	NA	South East Africa	East Africa	AFRICA	TRUE	uncallable	uncallable	uncallable	uncallable	ERR4677621	NA	16.8532	TRUE
Mozambique	NA	NA	SPT52522	NA	South East Africa	East Africa	AFRICA	TRUE	uncallable	uncallable	uncallable	uncallable	ERR4677622	NA	30.481	TRUE
Mozambique	NA	NA	SPT52521	NA	South East Africa	East Africa	AFRICA	TRUE	uncallable	uncallable	uncallable	uncallable	ERR4677623	NA	12.338	TRUE
Mozambique	NA	NA	SPT52524	NA	South East Africa	East Africa	AFRICA	TRUE	uncallable	uncallable	uncallable	uncallable	ERR4677624	NA	18.8659	TRUE
Mozambique	NA	NA	SPT52526	NA	South East Africa	East Africa	AFRICA	TRUE	uncallable	uncallable	uncallable	uncallable	ERR4677625	NA	37.5476	TRUE
Mozambique	NA	NA	SPT52525	NA	South East Africa	East Africa	AFRICA	TRUE	uncallable	uncallable	uncallable	uncallable	ERR4677626	NA	52.1452	TRUE
Mozambique	NA	NA	SPT52572	NA	South East Africa	East Africa	AFRICA	TRUE	uncallable	uncallable	uncallable	uncallable	ERR4677627	NA	16.6604	TRUE
Mozambique	NA	NA	SPT52574	NA	South East Africa	East Africa	AFRICA	TRUE	uncallable	uncallable	uncallable	uncallable	ERR4677628	NA	22.922	TRUE
Mozambique	NA	NA	SPT52571	NA	South East Africa	East Africa	AFRICA	TRUE	uncallable	uncallable	uncallable	uncallable	ERR4677629	NA	11.4195	TRUE
Mozambique	NA	NA	SPT52551	NA	South East Africa	East Africa	AFRICA	TRUE	uncallable	uncallable	uncallable	uncallable	ERR4677630	NA	15.885	TRUE
Mozambique	NA	NA	SPT52558	NA	South East Africa	East Africa	AFRICA	TRUE	uncallable	uncallable	uncallable	uncallable	ERR4677631	NA	21.3727	TRUE
Mozambique	NA	NA	SPT52553	NA	South East Africa	East Africa	AFRICA	TRUE	uncallable	uncallable	uncallable	uncallable	ERR4677632	NA	13.3207	TRUE
Mozambique	NA	NA	SPT52543	NA	South East Africa	East Africa	AFRICA	TRUE	uncallable	uncallable	uncallable	uncallable	ERR4677633	NA	38.3728	TRUE
Mozambique	NA	NA	SPT52555	NA	South East Africa	East Africa	AFRICA	TRUE	uncallable	uncallable	uncallable	uncallable	ERR4677634	NA	14.6642	TRUE
Mozambique	NA	NA	SPT52545	NA	South East Africa	East Africa	AFRICA	TRUE	uncallable	uncallable	uncallable	uncallable	ERR4677635	NA	32.3271	TRUE
Mozambique	NA	NA	SPT52557	NA	South East Africa	East Africa	AFRICA	TRUE	uncallable	uncallable	uncallable	uncallable	ERR4677636	NA	20.7183	TRUE
Mozambique	NA	NA	SPT52549	NA	South East Africa	East Africa	AFRICA	TRUE	uncallable	uncallable	uncallable	uncallable	ERR4677637	NA	17.3291	TRUE
Mozambique	NA	NA	SPT52544	NA	South East Africa	East Africa	AFRICA	TRUE	uncallable	uncallable	uncallable	uncallable	ERR4677638	NA	32.7449	TRUE
Mozambique	NA	NA	SPT52548	NA	South East Africa	East Africa	AFRICA	TRUE	uncallable	uncallable	uncallable	uncallable	ERR4677639	NA	20.7463	TRUE
Mozambique	NA	NA	SPT52546	NA	South East Africa	East Africa	AFRICA	TRUE	uncallable	uncallable	uncallable	uncallable	ERR4677640	NA	40.3009	TRUE
Mozambique	NA	NA	SPT52653	NA	South East Africa	East Africa	AFRICA	TRUE	uncallable	uncallable	uncallable	uncallable	ERR4677641	NA	60.8688	TRUE
Mozambique	NA	NA	SPT52657	NA	South East Africa	East Africa	AFRICA	TRUE	uncallable	uncallable	uncallable	uncallable	ERR4677642	NA	74.3694	TRUE
Mozambique	NA	NA	SPT52654	NA	South East Africa	East Africa	AFRICA	TRUE	uncallable	uncallable	uncallable	uncallable	ERR4677643	NA	148.683	TRUE
Mozambique	NA	NA	SPT52485	NA	South East Africa	East Africa	AFRICA	TRUE	uncallable	uncallable	uncallable	uncallable	ERR4677644	NA	15.2925	TRUE
Mozambique	NA	NA	SPT52486	NA	South East Africa	East Africa	AFRICA	TRUE	uncallable	uncallable	uncallable	uncallable	ERR4677645	NA	32.7558	TRUE
Mozambique	NA	NA	SPT52484	NA	South East Africa	East Africa	AFRICA	TRUE	uncallable	uncallable	uncallable	uncallable	ERR4677646	NA	13.421	TRUE
Mozambique	NA	NA	SPT52483	NA	South East Africa	East Africa	AFRICA	TRUE	uncallable	uncallable	uncallable	uncallable	ERR4677647	NA	42.133	TRUE
Mozambique	NA	NA	SPT52482	NA	South East Africa	East Africa	AFRICA	TRUE	uncallable	uncallable	uncallable	uncallable	ERR4677648	NA	20.5492	TRUE
Mozambique	NA	NA	SPT52439	NA	South East Africa	East Africa	AFRICA	TRUE	uncallable	uncallable	uncallable	uncallable	ERR4677649	NA	31.2356	TRUE
Mozambique	NA	NA	SPT52440	NA	South East Africa	East Africa	AFRICA	TRUE	uncallable	uncallable	uncallable	uncallable	ERR4677650	NA	72.5048	TRUE
Mozambique	NA	NA	SPT52437	NA	South East Africa	East Africa	AFRICA	TRUE	uncallable	uncallable	uncallable	uncallable	ERR4677651	NA	21.6748	TRUE
Mozambique	NA	NA	SPT52438	NA	South East Africa	East Africa	AFRICA	TRUE	uncallable	uncallable	uncallable	uncallable	ERR4677652	NA	4.00232	TRUE
Mozambique	NA	NA	SPT52434	NA	South East Africa	East Africa	AFRICA	TRUE	uncallable	uncallable	uncallable	uncallable	ERR4677653	NA	33.965	TRUE
Mozambique	NA	NA	SPT52436	NA	South East Africa	East Africa	AFRICA	TRUE	uncallable	uncallable	uncallable	uncallable	ERR4677654	NA	48.7497	TRUE
Mozambique	NA	NA	SPT52435	NA	South East Africa	East Africa	AFRICA	TRUE	uncallable	uncallable	uncallable	uncallable	ERR4677655	NA	52.1271	TRUE
Mozambique	NA	NA	SPT52433	NA	South East Africa	East Africa	AFRICA	TRUE	uncallable	uncallable	uncallable	uncallable	ERR4677656	NA	17.1992	TRUE
Mozambique	NA	NA	SPT52472	NA	South East Africa	East Africa	AFRICA	TRUE	uncallable	uncallable	uncallable	uncallable	ERR4677657	NA	42.963	TRUE
Mozambique	NA	NA	SPT52471	NA	South East Africa	East Africa	AFRICA	TRUE	uncallable	uncallable	uncallable	uncallable	ERR4677658	NA	13.336	TRUE
Mozambique	NA	NA	SPT52469	NA	South East Africa	East Africa	AFRICA	TRUE	uncallable	uncallable	uncallable	uncallable	ERR4677659	NA	25.0176	TRUE
Mozambique	NA	NA	SPT52470	NA	South East Africa	East Africa	AFRICA	TRUE	uncallable	uncallable	uncallable	uncallable	ERR4677660	NA	17.3318	TRUE
Mozambique	NA	NA	SPT52467	NA	South East Africa	East Africa	AFRICA	TRUE	uncallable	uncallable	uncallable	uncallable	ERR4677661	NA	10.9453	TRUE
Mozambique	NA	NA	SPT52468	NA	South East Africa	East Africa	AFRICA	TRUE	uncallable	uncallable	uncallable	uncallable	ERR4677662	NA	40.9912	TRUE
Mozambique	NA	NA	SPT52466	NA	South East Africa	East Africa	AFRICA	TRUE	uncallable	uncallable	uncallable	uncallable	ERR4677663	NA	33.267	TRUE
Mozambique	NA	NA	SPT52446	NA	South East Africa	East Africa	AFRICA	TRUE	uncallable	uncallable	uncallable	uncallable	ERR4677664	NA	18.8037	TRUE
Mozambique	NA	NA	SPT52445	NA	South East Africa	East Africa	AFRICA	TRUE	uncallable	uncallable	uncallable	uncallable	ERR4677665	NA	9.45514	TRUE
Mozambique	NA	NA	SPT52444	NA	South East Africa	East Africa	AFRICA	TRUE	uncallable	uncallable	uncallable	uncallable	ERR4677666	NA	25.8511	TRUE
Mozambique	NA	NA	SPT52442	NA	South East Africa	East Africa	AFRICA	TRUE	uncallable	uncallable	uncallable	uncallable	ERR4677667	NA	3.80842	TRUE
Mozambique	NA	NA	SPT52642	NA	South East Africa	East Africa	AFRICA	TRUE	uncallable	uncallable	uncallable	uncallable	ERR4677668	NA	13.637	TRUE
Mozambique	NA	NA	SPT52643	NA	South East Africa	East Africa	AFRICA	TRUE	uncallable	uncallable	uncallable	uncallable	ERR4677669	NA	18.5277	TRUE
Mozambique	NA	NA	SPT52644	NA	South East Africa	East Africa	AFRICA	TRUE	uncallable	uncallable	uncallable	uncallable	ERR4677670	NA	31.8622	TRUE
Mozambique	NA	NA	SPT52678	NA	South East Africa	East Africa	AFRICA	TRUE	uncallable	uncallable	uncallable	uncallable	ERR4677671	NA	28.6464	TRUE
Mozambique	NA	NA	SPT52679	NA	South East Africa	East Africa	AFRICA	TRUE	uncallable	uncallable	uncallable	uncallable	ERR4677672	NA	58.8966	TRUE
Mozambique	NA	NA	SPT52682	NA	South East Africa	East Africa	AFRICA	TRUE	uncallable	uncallable	uncallable	uncallable	ERR4677673	NA	7.49217	TRUE
Mozambique	NA	NA	SPT52680	NA	South East Africa	East Africa	AFRICA	TRUE	uncallable	uncallable	uncallable	uncallable	ERR4677674	NA	44.9473	TRUE
Mozambique	NA	NA	SPT52681	NA	South East Africa	East Africa	AFRICA	TRUE	uncallable	uncallable	uncallable	uncallable	ERR4677675	NA	39.3168	TRUE
Mozambique	NA	NA	SPT52740	NA	South East Africa	East Africa	AFRICA	TRUE	uncallable	uncallable	uncallable	uncallable	ERR4677676	NA	10.0615	TRUE
Mozambique	NA	NA	SPT52732	NA	South East Africa	East Africa	AFRICA	TRUE	uncallable	uncallable	uncallable	uncallable	ERR4677677	NA	114.628	TRUE
Mozambique	NA	NA	SPT52724	NA	South East Africa	East Africa	AFRICA	TRUE	uncallable	uncallable	uncallable	uncallable	ERR4677678	NA	42.466	TRUE
Mozambique	NA	NA	SPT52683	NA	South East Africa	East Africa	AFRICA	TRUE	uncallable	uncallable	uncallable	uncallable	ERR4677679	NA	29.2212	TRUE
Mozambique	NA	NA	SPT52748	NA	South East Africa	East Africa	AFRICA	TRUE	uncallable	uncallable	uncallable	uncallable	ERR4677680	NA	13.4763	TRUE
Mozambique	NA	NA	SPT52708	NA	South East Africa	East Africa	AFRICA	TRUE	uncallable	uncallable	uncallable	uncallable	ERR4677681	NA	47.7743	TRUE
Mozambique	NA	NA	SPT52699	NA	South East Africa	East Africa	AFRICA	TRUE	uncallable	uncallable	uncallable	uncallable	ERR4677682	NA	11.3168	TRUE
Mozambique	NA	NA	SPT52765	NA	South East Africa	East Africa	AFRICA	TRUE	uncallable	uncallable	uncallable	uncallable	ERR4677683	NA	67.5748	TRUE
Mozambique	NA	NA	SPT52739	NA	South East Africa	East Africa	AFRICA	TRUE	uncallable	uncallable	uncallable	uncallable	ERR4677684	NA	2.59228	TRUE
Mozambique	NA	NA	SPT52731	NA	South East Africa	East Africa	AFRICA	TRUE	uncallable	uncallable	uncallable	uncallable	ERR4677685	NA	12.2584	TRUE
Mozambique	NA	NA	SPT52698	NA	South East Africa	East Africa	AFRICA	TRUE	uncallable	uncallable	uncallable	uncallable	ERR4677686	NA	45.5263	TRUE
Mozambique	NA	NA	SPT52723	NA	South East Africa	East Africa	AFRICA	TRUE	uncallable	uncallable	uncallable	uncallable	ERR4677687	NA	33.3894	TRUE
Mozambique	NA	NA	SPT52684	NA	South East Africa	East Africa	AFRICA	TRUE	uncallable	uncallable	uncallable	uncallable	ERR4677688	NA	36.6921	TRUE
Mozambique	NA	NA	SPT52707	NA	South East Africa	East Africa	AFRICA	TRUE	uncallable	uncallable	uncallable	uncallable	ERR4677689	NA	6.86751	TRUE
Mozambique	NA	NA	SPT52700	NA	South East Africa	East Africa	AFRICA	TRUE	uncallable	uncallable	uncallable	uncallable	ERR4677690	NA	9.92771	TRUE
Mozambique	NA	NA	SPT52718	NA	South East Africa	East Africa	AFRICA	TRUE	uncallable	uncallable	uncallable	uncallable	ERR4677691	NA	13.8163	TRUE
Mozambique	NA	NA	SPT52756	NA	South East Africa	East Africa	AFRICA	TRUE	uncallable	uncallable	uncallable	uncallable	ERR4677692	NA	23.2462	TRUE
Mozambique	NA	NA	SPT52741	NA	South East Africa	East Africa	AFRICA	TRUE	uncallable	uncallable	uncallable	uncallable	ERR4677693	NA	24.4127	TRUE
Mozambique	NA	NA	SPT52696	NA	South East Africa	East Africa	AFRICA	TRUE	uncallable	uncallable	uncallable	uncallable	ERR4677694	NA	39.7806	TRUE
Mozambique	NA	NA	SPT52725	NA	South East Africa	East Africa	AFRICA	TRUE	uncallable	uncallable	uncallable	uncallable	ERR4677695	NA	51.1997	TRUE
Mozambique	NA	NA	SPT52685	NA	South East Africa	East Africa	AFRICA	TRUE	uncallable	uncallable	uncallable	uncallable	ERR4677696	NA	18.8373	TRUE
Mozambique	NA	NA	SPT52750	NA	South East Africa	East Africa	AFRICA	TRUE	uncallable	uncallable	uncallable	uncallable	ERR4677697	NA	19.1452	TRUE
Mozambique	NA	NA	SPT52709	NA	South East Africa	East Africa	AFRICA	TRUE	uncallable	uncallable	uncallable	uncallable	ERR4677698	NA	24.5827	TRUE
Mozambique	NA	NA	SPT52705	NA	South East Africa	East Africa	AFRICA	TRUE	uncallable	uncallable	uncallable	uncallable	ERR4677699	NA	8.54832	TRUE
Mozambique	NA	NA	SPT52717	NA	South East Africa	East Africa	AFRICA	TRUE	uncallable	uncallable	uncallable	uncallable	ERR4677700	NA	40.2325	TRUE
Mozambique	NA	NA	SPT52759	NA	South East Africa	East Africa	AFRICA	TRUE	uncallable	uncallable	uncallable	uncallable	ERR4677701	NA	19.2067	TRUE
Mozambique	NA	NA	SPT52695	NA	South East Africa	East Africa	AFRICA	TRUE	uncallable	uncallable	uncallable	uncallable	ERR4677702	NA	52.2686	TRUE
Mozambique	NA	NA	SPT52726	NA	South East Africa	East Africa	AFRICA	TRUE	uncallable	uncallable	uncallable	uncallable	ERR4677703	NA	26.1495	TRUE
Mozambique	NA	NA	SPT52686	NA	South East Africa	East Africa	AFRICA	TRUE	uncallable	uncallable	uncallable	uncallable	ERR4677704	NA	44.9572	TRUE
Mozambique	NA	NA	SPT52710	NA	South East Africa	East Africa	AFRICA	TRUE	uncallable	uncallable	uncallable	uncallable	ERR4677705	NA	9.69094	TRUE
Mozambique	NA	NA	SPT52758	NA	South East Africa	East Africa	AFRICA	TRUE	uncallable	uncallable	uncallable	uncallable	ERR4677706	NA	17.7131	TRUE
Mozambique	NA	NA	SPT52743	NA	South East Africa	East Africa	AFRICA	TRUE	uncallable	uncallable	uncallable	uncallable	ERR4677707	NA	47.4035	TRUE
Mozambique	NA	NA	SPT52693	NA	South East Africa	East Africa	AFRICA	TRUE	uncallable	uncallable	uncallable	uncallable	ERR4677708	NA	16.1547	TRUE
Mozambique	NA	NA	SPT52687	NA	South East Africa	East Africa	AFRICA	TRUE	uncallable	uncallable	uncallable	uncallable	ERR4677709	NA	19.244	TRUE
Mozambique	NA	NA	SPT52752	NA	South East Africa	East Africa	AFRICA	TRUE	uncallable	uncallable	uncallable	uncallable	ERR4677710	NA	9.95315	TRUE
Mozambique	NA	NA	SPT52712	NA	South East Africa	East Africa	AFRICA	TRUE	uncallable	uncallable	uncallable	uncallable	ERR4677711	NA	30.3208	TRUE
Mozambique	NA	NA	SPT52706	NA	South East Africa	East Africa	AFRICA	TRUE	uncallable	uncallable	uncallable	uncallable	ERR4677712	NA	27.4352	TRUE
Mozambique	NA	NA	SPT52744	NA	South East Africa	East Africa	AFRICA	TRUE	uncallable	uncallable	uncallable	uncallable	ERR4677713	NA	117.127	TRUE
Mozambique	NA	NA	SPT52735	NA	South East Africa	East Africa	AFRICA	TRUE	uncallable	uncallable	uncallable	uncallable	ERR4677714	NA	3.43802	TRUE
Mozambique	NA	NA	SPT52694	NA	South East Africa	East Africa	AFRICA	TRUE	uncallable	uncallable	uncallable	uncallable	ERR4677715	NA	14.606	TRUE
Mozambique	NA	NA	SPT52590	NA	South East Africa	East Africa	AFRICA	TRUE	uncallable	uncallable	uncallable	uncallable	ERR4677716	NA	4.87756	TRUE
Mozambique	NA	NA	SPT52594	NA	South East Africa	East Africa	AFRICA	TRUE	uncallable	uncallable	uncallable	uncallable	ERR4677717	NA	12.7562	TRUE
Mozambique	NA	NA	SPT52597	NA	South East Africa	East Africa	AFRICA	TRUE	uncallable	uncallable	uncallable	uncallable	ERR4677718	NA	7.08583	TRUE
Mozambique	NA	NA	SPT52599	NA	South East Africa	East Africa	AFRICA	TRUE	uncallable	uncallable	uncallable	uncallable	ERR4677719	NA	29.3914	TRUE
Mozambique	NA	NA	SPT52600	NA	South East Africa	East Africa	AFRICA	TRUE	uncallable	uncallable	uncallable	uncallable	ERR4677720	NA	4.01854	TRUE
Mozambique	NA	NA	SPT52604	NA	South East Africa	East Africa	AFRICA	TRUE	uncallable	uncallable	uncallable	uncallable	ERR4677721	NA	1.2178	TRUE
Mozambique	NA	NA	SPT52662	NA	South East Africa	East Africa	AFRICA	TRUE	uncallable	uncallable	uncallable	uncallable	ERR4677722	NA	31.4791	TRUE
Mozambique	NA	NA	SPT52664	NA	South East Africa	East Africa	AFRICA	TRUE	uncallable	uncallable	uncallable	uncallable	ERR4677723	NA	89.3454	TRUE
Mozambique	NA	NA	SPT52666	NA	South East Africa	East Africa	AFRICA	TRUE	uncallable	uncallable	uncallable	uncallable	ERR4677724	NA	57.2359	TRUE
Mozambique	NA	NA	SPT52665	NA	South East Africa	East Africa	AFRICA	TRUE	uncallable	uncallable	uncallable	uncallable	ERR4677725	NA	14.3929	TRUE
Mozambique	NA	NA	SPT52668	NA	South East Africa	East Africa	AFRICA	TRUE	uncallable	uncallable	uncallable	uncallable	ERR4677726	NA	46.6779	TRUE
Mozambique	NA	NA	SPT52667	NA	South East Africa	East Africa	AFRICA	TRUE	uncallable	uncallable	uncallable	uncallable	ERR4677727	NA	19.5692	TRUE
Mozambique	NA	NA	SPT52652	NA	South East Africa	East Africa	AFRICA	TRUE	uncallable	uncallable	uncallable	uncallable	ERR4677728	NA	35.9128	TRUE
Mozambique	NA	NA	SPT52651	NA	South East Africa	East Africa	AFRICA	TRUE	uncallable	uncallable	uncallable	uncallable	ERR4677729	NA	15.7462	TRUE
Mozambique	NA	NA	SPT52648	NA	South East Africa	East Africa	AFRICA	TRUE	uncallable	uncallable	uncallable	uncallable	ERR4677730	NA	15.7717	TRUE
Mozambique	NA	NA	SPT52649	NA	South East Africa	East Africa	AFRICA	TRUE	uncallable	uncallable	uncallable	uncallable	ERR4677731	NA	36.838	TRUE
Mozambique	NA	NA	SPT52646	NA	South East Africa	East Africa	AFRICA	TRUE	uncallable	uncallable	uncallable	uncallable	ERR4677732	NA	18.2717	TRUE
Mozambique	NA	NA	SPT52647	NA	South East Africa	East Africa	AFRICA	TRUE	uncallable	uncallable	uncallable	uncallable	ERR4677733	NA	38.6034	TRUE
Mozambique	NA	NA	SPT52650	NA	South East Africa	East Africa	AFRICA	TRUE	uncallable	uncallable	uncallable	uncallable	ERR4677734	NA	11.9708	TRUE
Mozambique	NA	NA	SPT52637	NA	South East Africa	East Africa	AFRICA	TRUE	uncallable	uncallable	uncallable	uncallable	ERR4677735	NA	13.3562	TRUE
Mozambique	NA	NA	SPT52638	NA	South East Africa	East Africa	AFRICA	TRUE	uncallable	uncallable	uncallable	uncallable	ERR4677736	NA	16.4694	TRUE
Mozambique	NA	NA	SPT52640	NA	South East Africa	East Africa	AFRICA	TRUE	uncallable	uncallable	uncallable	uncallable	ERR4677737	NA	13.2744	TRUE
Mozambique	NA	NA	SPT52639	NA	South East Africa	East Africa	AFRICA	TRUE	uncallable	uncallable	uncallable	uncallable	ERR4677738	NA	11.5434	TRUE
Mozambique	NA	NA	SPT52641	NA	South East Africa	East Africa	AFRICA	TRUE	uncallable	uncallable	uncallable	uncallable	ERR4677739	NA	37.4778	TRUE
Mozambique	NA	NA	SPT52932	NA	South East Africa	East Africa	AFRICA	TRUE	uncallable	uncallable	uncallable	uncallable	ERR4677740	NA	15.039	TRUE
Mozambique	NA	NA	SPT52887	NA	South East Africa	East Africa	AFRICA	TRUE	uncallable	uncallable	uncallable	uncallable	ERR4677741	NA	9.33303	TRUE
Mozambique	NA	NA	SPT52889	NA	South East Africa	East Africa	AFRICA	TRUE	uncallable	uncallable	uncallable	uncallable	ERR4677742	NA	19.6779	TRUE
Mozambique	NA	NA	SPT52890	NA	South East Africa	East Africa	AFRICA	TRUE	uncallable	uncallable	uncallable	uncallable	ERR4677743	NA	35.2269	TRUE
Mozambique	NA	NA	SPT52893	NA	South East Africa	East Africa	AFRICA	TRUE	uncallable	uncallable	uncallable	uncallable	ERR4677744	NA	58.4112	TRUE
Mozambique	NA	NA	SPT52911	NA	South East Africa	East Africa	AFRICA	TRUE	uncallable	uncallable	uncallable	uncallable	ERR4677745	NA	15.686	TRUE
Mozambique	NA	NA	SPT52913	NA	South East Africa	East Africa	AFRICA	TRUE	uncallable	uncallable	uncallable	uncallable	ERR4677746	NA	19.073	TRUE
Mozambique	NA	NA	SPT52914	NA	South East Africa	East Africa	AFRICA	TRUE	uncallable	uncallable	uncallable	uncallable	ERR4677747	NA	4.83624	TRUE
Mozambique	NA	NA	SPT52916	NA	South East Africa	East Africa	AFRICA	TRUE	uncallable	uncallable	uncallable	uncallable	ERR4677748	NA	53.3696	TRUE
Mozambique	NA	NA	SPT52918	NA	South East Africa	East Africa	AFRICA	TRUE	uncallable	uncallable	uncallable	uncallable	ERR4677749	NA	6.24322	TRUE
Mozambique	NA	NA	SPT52905	NA	South East Africa	East Africa	AFRICA	TRUE	uncallable	uncallable	uncallable	uncallable	ERR4677750	NA	3.33056	TRUE
Mozambique	NA	NA	SPT52906	NA	South East Africa	East Africa	AFRICA	TRUE	uncallable	uncallable	uncallable	uncallable	ERR4677751	NA	29.3048	TRUE
Mozambique	NA	NA	SPT52908	NA	South East Africa	East Africa	AFRICA	TRUE	uncallable	uncallable	uncallable	uncallable	ERR4677752	NA	52.196	TRUE
Mozambique	NA	NA	SPT52875	NA	South East Africa	East Africa	AFRICA	TRUE	uncallable	uncallable	uncallable	uncallable	ERR4677753	NA	11.3096	TRUE
Mozambique	NA	NA	SPT52877	NA	South East Africa	East Africa	AFRICA	TRUE	uncallable	uncallable	uncallable	uncallable	ERR4677754	NA	15.4701	TRUE
Mozambique	NA	NA	SPT52919	NA	South East Africa	East Africa	AFRICA	TRUE	uncallable	uncallable	uncallable	uncallable	ERR4677755	NA	19.1481	TRUE
Mozambique	NA	NA	SPT52921	NA	South East Africa	East Africa	AFRICA	TRUE	uncallable	uncallable	uncallable	uncallable	ERR4677756	NA	23.847	TRUE
Mozambique	NA	NA	SPT52924	NA	South East Africa	East Africa	AFRICA	TRUE	uncallable	uncallable	uncallable	uncallable	ERR4677757	NA	71.1744	TRUE
Mozambique	NA	NA	SPT52926	NA	South East Africa	East Africa	AFRICA	TRUE	uncallable	uncallable	uncallable	uncallable	ERR4677758	NA	17.7175	TRUE
Mozambique	NA	NA	SPT52938	NA	South East Africa	East Africa	AFRICA	TRUE	uncallable	uncallable	uncallable	uncallable	ERR4677759	NA	8.52175	TRUE
Mozambique	NA	NA	SPT52935	NA	South East Africa	East Africa	AFRICA	TRUE	uncallable	uncallable	uncallable	uncallable	ERR4677760	NA	15.275	TRUE
Mozambique	NA	NA	SPT52940	NA	South East Africa	East Africa	AFRICA	TRUE	uncallable	uncallable	uncallable	uncallable	ERR4677761	NA	35.8253	TRUE
Mozambique	NA	NA	SPT52897	NA	South East Africa	East Africa	AFRICA	TRUE	uncallable	uncallable	uncallable	uncallable	ERR4677762	NA	68.1732	TRUE
Mozambique	NA	NA	SPT52655	NA	South East Africa	East Africa	AFRICA	TRUE	uncallable	uncallable	uncallable	uncallable	ERR4677763	NA	79.2698	TRUE
Mozambique	NA	NA	SPT52658	NA	South East Africa	East Africa	AFRICA	TRUE	uncallable	uncallable	uncallable	uncallable	ERR4677764	NA	36.645	TRUE
Mozambique	NA	NA	SPT52660	NA	South East Africa	East Africa	AFRICA	TRUE	uncallable	uncallable	uncallable	uncallable	ERR4677765	NA	48.9299	TRUE
Mozambique	NA	NA	SPT52659	NA	South East Africa	East Africa	AFRICA	TRUE	uncallable	uncallable	uncallable	uncallable	ERR4677766	NA	49.5571	TRUE
Mozambique	NA	NA	SPT52631	NA	South East Africa	East Africa	AFRICA	TRUE	uncallable	uncallable	uncallable	uncallable	ERR4677767	NA	63.6145	TRUE
Mozambique	NA	NA	SPT52632	NA	South East Africa	East Africa	AFRICA	TRUE	uncallable	uncallable	uncallable	uncallable	ERR4677768	NA	14.2853	TRUE
Mozambique	NA	NA	SPT52636	NA	South East Africa	East Africa	AFRICA	TRUE	uncallable	uncallable	uncallable	uncallable	ERR4677769	NA	17.9517	TRUE
Mozambique	NA	NA	SPT52630	NA	South East Africa	East Africa	AFRICA	TRUE	uncallable	uncallable	uncallable	uncallable	ERR4677770	NA	32.2577	TRUE
Mozambique	NA	NA	SPT52633	NA	South East Africa	East Africa	AFRICA	TRUE	uncallable	uncallable	uncallable	uncallable	ERR4677771	NA	18.3431	TRUE
Mozambique	NA	NA	SPT52635	NA	South East Africa	East Africa	AFRICA	TRUE	uncallable	uncallable	uncallable	uncallable	ERR4677772	NA	42.7131	TRUE
Mozambique	NA	NA	SPT52634	NA	South East Africa	East Africa	AFRICA	TRUE	uncallable	uncallable	uncallable	uncallable	ERR4677773	NA	46.9933	TRUE
Mozambique	NA	NA	SPT52609	NA	South East Africa	East Africa	AFRICA	TRUE	uncallable	uncallable	uncallable	uncallable	ERR4677774	NA	44.2309	TRUE
Mozambique	NA	NA	SPT52669	NA	South East Africa	East Africa	AFRICA	TRUE	uncallable	uncallable	uncallable	uncallable	ERR4677775	NA	46.4288	TRUE
Mozambique	NA	NA	SPT52670	NA	South East Africa	East Africa	AFRICA	TRUE	uncallable	uncallable	uncallable	uncallable	ERR4677776	NA	21.3678	TRUE
Mozambique	NA	NA	SPT52671	NA	South East Africa	East Africa	AFRICA	TRUE	uncallable	uncallable	uncallable	uncallable	ERR4677777	NA	16.2767	TRUE
Mozambique	NA	NA	SPT52672	NA	South East Africa	East Africa	AFRICA	TRUE	uncallable	uncallable	uncallable	uncallable	ERR4677778	NA	19.7241	TRUE
Mozambique	NA	NA	SPT52673	NA	South East Africa	East Africa	AFRICA	TRUE	uncallable	uncallable	uncallable	uncallable	ERR4677779	NA	15.1683	TRUE
Mozambique	NA	NA	SPT52675	NA	South East Africa	East Africa	AFRICA	TRUE	uncallable	uncallable	uncallable	uncallable	ERR4677780	NA	36.045	TRUE
Mozambique	NA	NA	SPT52674	NA	South East Africa	East Africa	AFRICA	TRUE	uncallable	uncallable	uncallable	uncallable	ERR4677781	NA	35.2932	TRUE
Mozambique	NA	NA	SPT52622	NA	South East Africa	East Africa	AFRICA	TRUE	uncallable	uncallable	uncallable	uncallable	ERR4677782	NA	24.2814	TRUE
Mozambique	NA	NA	SPT52620	NA	South East Africa	East Africa	AFRICA	TRUE	uncallable	uncallable	uncallable	uncallable	ERR4677783	NA	44.9632	TRUE
Mozambique	NA	NA	SPT52626	NA	South East Africa	East Africa	AFRICA	TRUE	uncallable	uncallable	uncallable	uncallable	ERR4677784	NA	81.5048	TRUE
Mozambique	NA	NA	SPT52615	NA	South East Africa	East Africa	AFRICA	TRUE	uncallable	uncallable	uncallable	uncallable	ERR4677785	NA	2.17154	TRUE
Mozambique	NA	NA	SPT52614	NA	South East Africa	East Africa	AFRICA	TRUE	uncallable	uncallable	uncallable	uncallable	ERR4677786	NA	11.3705	TRUE
Mozambique	NA	NA	SPT52441	NA	South East Africa	East Africa	AFRICA	TRUE	uncallable	uncallable	uncallable	uncallable	ERR4677787	NA	49.869	TRUE
Mozambique	NA	NA	SPT52539	NA	South East Africa	East Africa	AFRICA	TRUE	uncallable	uncallable	uncallable	uncallable	ERR4677788	NA	48.2857	TRUE
Mozambique	NA	NA	SPT52538	NA	South East Africa	East Africa	AFRICA	TRUE	uncallable	uncallable	uncallable	uncallable	ERR4677789	NA	122.208	TRUE
Mozambique	NA	NA	SPT52537	NA	South East Africa	East Africa	AFRICA	TRUE	uncallable	uncallable	uncallable	uncallable	ERR4677790	NA	113.868	TRUE
Mozambique	NA	NA	SPT52540	NA	South East Africa	East Africa	AFRICA	TRUE	uncallable	uncallable	uncallable	uncallable	ERR4677791	NA	88.2067	TRUE
Mozambique	NA	NA	SPT52541	NA	South East Africa	East Africa	AFRICA	TRUE	uncallable	uncallable	uncallable	uncallable	ERR4677792	NA	40.9191	TRUE
Mozambique	NA	NA	SPT52542	NA	South East Africa	East Africa	AFRICA	TRUE	uncallable	uncallable	uncallable	uncallable	ERR4677793	NA	37.4389	TRUE
Mozambique	NA	NA	SPT52565	NA	South East Africa	East Africa	AFRICA	TRUE	uncallable	uncallable	uncallable	uncallable	ERR4677794	NA	2.5375	TRUE
Mozambique	NA	NA	SPT52566	NA	South East Africa	East Africa	AFRICA	TRUE	uncallable	uncallable	uncallable	uncallable	ERR4677795	NA	38.103	TRUE
Mozambique	NA	NA	SPT52564	NA	South East Africa	East Africa	AFRICA	TRUE	uncallable	uncallable	uncallable	uncallable	ERR4677796	NA	66.1442	TRUE
Mozambique	NA	NA	SPT52563	NA	South East Africa	East Africa	AFRICA	TRUE	uncallable	uncallable	uncallable	uncallable	ERR4677797	NA	59.3225	TRUE
Mozambique	NA	NA	SPT52561	NA	South East Africa	East Africa	AFRICA	TRUE	uncallable	uncallable	uncallable	uncallable	ERR4677798	NA	20.4898	TRUE
Mozambique	NA	NA	SPT52559	NA	South East Africa	East Africa	AFRICA	TRUE	uncallable	uncallable	uncallable	uncallable	ERR4677799	NA	43.9492	TRUE
Mozambique	NA	NA	SPT52562	NA	South East Africa	East Africa	AFRICA	TRUE	uncallable	uncallable	uncallable	uncallable	ERR4677800	NA	71.1109	TRUE
Mozambique	NA	NA	SPT52575	NA	South East Africa	East Africa	AFRICA	TRUE	uncallable	uncallable	uncallable	uncallable	ERR4677801	NA	25.1543	TRUE
Mozambique	NA	NA	SPT52580	NA	South East Africa	East Africa	AFRICA	TRUE	uncallable	uncallable	uncallable	uncallable	ERR4677802	NA	14.2933	TRUE
Mozambique	NA	NA	SPT52579	NA	South East Africa	East Africa	AFRICA	TRUE	uncallable	uncallable	uncallable	uncallable	ERR4677803	NA	3.46375	TRUE
Mozambique	NA	NA	SPT52581	NA	South East Africa	East Africa	AFRICA	TRUE	uncallable	uncallable	uncallable	uncallable	ERR4677804	NA	60.2118	TRUE
Mozambique	NA	NA	SPT52496	NA	South East Africa	East Africa	AFRICA	TRUE	uncallable	uncallable	uncallable	uncallable	ERR4677805	NA	15.8189	TRUE
Mozambique	NA	NA	SPT52498	NA	South East Africa	East Africa	AFRICA	TRUE	uncallable	uncallable	uncallable	uncallable	ERR4677806	NA	18.692	TRUE
Mozambique	NA	NA	SPT52497	NA	South East Africa	East Africa	AFRICA	TRUE	uncallable	uncallable	uncallable	uncallable	ERR4677807	NA	21.7364	TRUE
Mozambique	NA	NA	SPT52500	NA	South East Africa	East Africa	AFRICA	TRUE	uncallable	uncallable	uncallable	uncallable	ERR4677808	NA	47.3659	TRUE
Mozambique	NA	NA	SPT52501	NA	South East Africa	East Africa	AFRICA	TRUE	uncallable	uncallable	uncallable	uncallable	ERR4677809	NA	19.1849	TRUE
Mozambique	NA	NA	SPT52499	NA	South East Africa	East Africa	AFRICA	TRUE	uncallable	uncallable	uncallable	uncallable	ERR4677810	NA	48.8128	TRUE
Mozambique	NA	NA	SPT52807	NA	South East Africa	East Africa	AFRICA	TRUE	uncallable	uncallable	uncallable	uncallable	ERR4677811	NA	23.8483	TRUE
Mozambique	NA	NA	SPT52805	NA	South East Africa	East Africa	AFRICA	TRUE	uncallable	uncallable	uncallable	uncallable	ERR4677812	NA	7.35959	TRUE
Mozambique	NA	NA	SPT52810	NA	South East Africa	East Africa	AFRICA	TRUE	uncallable	uncallable	uncallable	uncallable	ERR4677813	NA	3.58186	TRUE
Mozambique	NA	NA	SPT52809	NA	South East Africa	East Africa	AFRICA	TRUE	uncallable	uncallable	uncallable	uncallable	ERR4677814	NA	35.4099	TRUE
Mozambique	NA	NA	SPT52815	NA	South East Africa	East Africa	AFRICA	TRUE	uncallable	uncallable	uncallable	uncallable	ERR4677815	NA	18.1891	TRUE
Mozambique	NA	NA	SPT52785	NA	South East Africa	East Africa	AFRICA	TRUE	uncallable	uncallable	uncallable	uncallable	ERR4677816	NA	21.7073	TRUE
Mozambique	NA	NA	SPT52790	NA	South East Africa	East Africa	AFRICA	TRUE	uncallable	uncallable	uncallable	uncallable	ERR4677817	NA	35.1824	TRUE
Mozambique	NA	NA	SPT52777	NA	South East Africa	East Africa	AFRICA	TRUE	uncallable	uncallable	uncallable	uncallable	ERR4677818	NA	47.2069	TRUE
Mozambique	NA	NA	SPT52781	NA	South East Africa	East Africa	AFRICA	TRUE	uncallable	uncallable	uncallable	uncallable	ERR4677819	NA	137.237	TRUE
Mozambique	NA	NA	SPT52782	NA	South East Africa	East Africa	AFRICA	TRUE	uncallable	uncallable	uncallable	uncallable	ERR4677820	NA	119.643	TRUE
Mozambique	NA	NA	SPT52783	NA	South East Africa	East Africa	AFRICA	TRUE	uncallable	uncallable	uncallable	uncallable	ERR4677821	NA	6.43413	TRUE
Mozambique	NA	NA	SPT52844	NA	South East Africa	East Africa	AFRICA	TRUE	uncallable	uncallable	uncallable	uncallable	ERR4677822	NA	7.7661	TRUE
Mozambique	NA	NA	SPT52841	NA	South East Africa	East Africa	AFRICA	TRUE	uncallable	uncallable	uncallable	uncallable	ERR4677823	NA	33.0176	TRUE
Mozambique	NA	NA	SPT52843	NA	South East Africa	East Africa	AFRICA	TRUE	uncallable	uncallable	uncallable	uncallable	ERR4677824	NA	26.1846	TRUE
Mozambique	NA	NA	SPT52824	NA	South East Africa	East Africa	AFRICA	TRUE	uncallable	uncallable	uncallable	uncallable	ERR4677825	NA	54.6506	TRUE
Mozambique	NA	NA	SPT52958	NA	South East Africa	East Africa	AFRICA	TRUE	uncallable	uncallable	uncallable	uncallable	ERR4677826	NA	59.7949	TRUE
Mozambique	NA	NA	SPT52954	NA	South East Africa	East Africa	AFRICA	TRUE	uncallable	uncallable	uncallable	uncallable	ERR4677827	NA	6.41235	TRUE
Mozambique	NA	NA	SPT52953	NA	South East Africa	East Africa	AFRICA	TRUE	uncallable	uncallable	uncallable	uncallable	ERR4677828	NA	64.1165	TRUE
Mozambique	NA	NA	SPT52952	NA	South East Africa	East Africa	AFRICA	TRUE	uncallable	uncallable	uncallable	uncallable	ERR4677829	NA	9.74033	TRUE
Mozambique	NA	NA	SPT52943	NA	South East Africa	East Africa	AFRICA	TRUE	uncallable	uncallable	uncallable	uncallable	ERR4677830	NA	1.87831	TRUE
Mozambique	NA	NA	SPT52944	NA	South East Africa	East Africa	AFRICA	TRUE	uncallable	uncallable	uncallable	uncallable	ERR4677831	NA	33.1193	TRUE
Mozambique	NA	NA	SPT52948	NA	South East Africa	East Africa	AFRICA	TRUE	uncallable	uncallable	uncallable	uncallable	ERR4677832	NA	61.5011	TRUE
Mozambique	NA	NA	SPT52950	NA	South East Africa	East Africa	AFRICA	TRUE	uncallable	uncallable	uncallable	uncallable	ERR4677833	NA	166.059	TRUE
Mozambique	NA	NA	SPT52929	NA	South East Africa	East Africa	AFRICA	TRUE	uncallable	uncallable	uncallable	uncallable	ERR4677834	NA	13.3415	TRUE
Mozambique	NA	NA	SPT53032	NA	South East Africa	East Africa	AFRICA	TRUE	uncallable	uncallable	uncallable	uncallable	ERR4677835	NA	24.8998	TRUE
Mozambique	NA	NA	SPT53029	NA	South East Africa	East Africa	AFRICA	TRUE	uncallable	uncallable	uncallable	uncallable	ERR4677836	NA	11.2561	TRUE
Mozambique	NA	NA	SPT52988	NA	South East Africa	East Africa	AFRICA	TRUE	uncallable	uncallable	uncallable	uncallable	ERR4677837	NA	61.2948	TRUE
Mozambique	NA	NA	SPT52984	NA	South East Africa	East Africa	AFRICA	TRUE	uncallable	uncallable	uncallable	uncallable	ERR4677838	NA	22.2059	TRUE
Mozambique	NA	NA	SPT52981	NA	South East Africa	East Africa	AFRICA	TRUE	uncallable	uncallable	uncallable	uncallable	ERR4677839	NA	42.9139	TRUE
Mozambique	NA	NA	SPT53012	NA	South East Africa	East Africa	AFRICA	TRUE	uncallable	uncallable	uncallable	uncallable	ERR4677840	NA	12.8719	TRUE
Mozambique	NA	NA	SPT53011	NA	South East Africa	East Africa	AFRICA	TRUE	uncallable	uncallable	uncallable	uncallable	ERR4677841	NA	10.0343	TRUE
Mozambique	NA	NA	SPT53008	NA	South East Africa	East Africa	AFRICA	TRUE	uncallable	uncallable	uncallable	uncallable	ERR4677842	NA	13.0969	TRUE
Mozambique	NA	NA	SPT53006	NA	South East Africa	East Africa	AFRICA	TRUE	uncallable	uncallable	uncallable	uncallable	ERR4677843	NA	5.41789	TRUE
Mozambique	NA	NA	SPT53005	NA	South East Africa	East Africa	AFRICA	TRUE	uncallable	uncallable	uncallable	uncallable	ERR4677844	NA	9.71515	TRUE
Mozambique	NA	NA	SPT52996	NA	South East Africa	East Africa	AFRICA	TRUE	uncallable	uncallable	uncallable	uncallable	ERR4677845	NA	15.7441	TRUE
Mozambique	NA	NA	SPT52993	NA	South East Africa	East Africa	AFRICA	TRUE	uncallable	uncallable	uncallable	uncallable	ERR4677846	NA	14.3195	TRUE
Mozambique	NA	NA	SPT52994	NA	South East Africa	East Africa	AFRICA	TRUE	uncallable	uncallable	uncallable	uncallable	ERR4677847	NA	19.8058	TRUE
Mozambique	NA	NA	SPT52992	NA	South East Africa	East Africa	AFRICA	TRUE	uncallable	uncallable	uncallable	uncallable	ERR4677848	NA	23.6583	TRUE
Mozambique	NA	NA	SPT52991	NA	South East Africa	East Africa	AFRICA	TRUE	uncallable	uncallable	uncallable	uncallable	ERR4677849	NA	17.1705	TRUE
Mozambique	NA	NA	SPT52989	NA	South East Africa	East Africa	AFRICA	TRUE	uncallable	uncallable	uncallable	uncallable	ERR4677850	NA	7.55567	TRUE
Mozambique	NA	NA	SPT53004	NA	South East Africa	East Africa	AFRICA	TRUE	uncallable	uncallable	uncallable	uncallable	ERR4677851	NA	9.09597	TRUE
Mozambique	NA	NA	SPT53002	NA	South East Africa	East Africa	AFRICA	TRUE	uncallable	uncallable	uncallable	uncallable	ERR4677852	NA	28.8909	TRUE
Mozambique	NA	NA	SPT53000	NA	South East Africa	East Africa	AFRICA	TRUE	uncallable	uncallable	uncallable	uncallable	ERR4677853	NA	14.0756	TRUE
Mozambique	NA	NA	SPT53001	NA	South East Africa	East Africa	AFRICA	TRUE	uncallable	uncallable	uncallable	uncallable	ERR4677854	NA	15.8644	TRUE
Mozambique	NA	NA	SPT52999	NA	South East Africa	East Africa	AFRICA	TRUE	uncallable	uncallable	uncallable	uncallable	ERR4677855	NA	13.4199	TRUE
Mozambique	NA	NA	SPT52998	NA	South East Africa	East Africa	AFRICA	TRUE	uncallable	uncallable	uncallable	uncallable	ERR4677856	NA	13.3115	TRUE
Mozambique	NA	NA	SPT52997	NA	South East Africa	East Africa	AFRICA	TRUE	uncallable	uncallable	uncallable	uncallable	ERR4677857	NA	15.9399	TRUE
Mozambique	NA	NA	SPT53051	NA	South East Africa	East Africa	AFRICA	TRUE	uncallable	uncallable	uncallable	uncallable	ERR4677858	NA	8.372	TRUE
Mozambique	NA	NA	SPT53049	NA	South East Africa	East Africa	AFRICA	TRUE	uncallable	uncallable	uncallable	uncallable	ERR4677859	NA	14.0717	TRUE
Mozambique	NA	NA	SPT53050	NA	South East Africa	East Africa	AFRICA	TRUE	uncallable	uncallable	uncallable	uncallable	ERR4677860	NA	13.9944	TRUE
Mozambique	NA	NA	SPT53047	NA	South East Africa	East Africa	AFRICA	TRUE	uncallable	uncallable	uncallable	uncallable	ERR4677861	NA	5.40693	TRUE
Mozambique	NA	NA	SPT53046	NA	South East Africa	East Africa	AFRICA	TRUE	uncallable	uncallable	uncallable	uncallable	ERR4677862	NA	9.53435	TRUE
Mozambique	NA	NA	SPT53018	NA	South East Africa	East Africa	AFRICA	TRUE	uncallable	uncallable	uncallable	uncallable	ERR4677863	NA	14.1711	TRUE
Mozambique	NA	NA	SPT53016	NA	South East Africa	East Africa	AFRICA	TRUE	uncallable	uncallable	uncallable	uncallable	ERR4677864	NA	7.09821	TRUE
Mozambique	NA	NA	SPT53019	NA	South East Africa	East Africa	AFRICA	TRUE	uncallable	uncallable	uncallable	uncallable	ERR4677865	NA	10.0292	TRUE
Mozambique	NA	NA	SPT53015	NA	South East Africa	East Africa	AFRICA	TRUE	uncallable	uncallable	uncallable	uncallable	ERR4677866	NA	15.0964	TRUE
Mozambique	NA	NA	SPT53014	NA	South East Africa	East Africa	AFRICA	TRUE	uncallable	uncallable	uncallable	uncallable	ERR4677867	NA	24.1148	TRUE
Mozambique	NA	NA	SPT53013	NA	South East Africa	East Africa	AFRICA	TRUE	uncallable	uncallable	uncallable	uncallable	ERR4677868	NA	7.11437	TRUE
Mozambique	NA	NA	SPT53025	NA	South East Africa	East Africa	AFRICA	TRUE	uncallable	uncallable	uncallable	uncallable	ERR4677869	NA	12.5859	TRUE
Mozambique	NA	NA	SPT53026	NA	South East Africa	East Africa	AFRICA	TRUE	uncallable	uncallable	uncallable	uncallable	ERR4677870	NA	16.2429	TRUE
Mozambique	NA	NA	SPT53027	NA	South East Africa	East Africa	AFRICA	TRUE	uncallable	uncallable	uncallable	uncallable	ERR4677871	NA	11.1836	TRUE
Mozambique	NA	NA	SPT53044	NA	South East Africa	East Africa	AFRICA	TRUE	uncallable	uncallable	uncallable	uncallable	ERR4677872	NA	12.5617	TRUE
Mozambique	NA	NA	SPT53028	NA	South East Africa	East Africa	AFRICA	TRUE	uncallable	uncallable	uncallable	uncallable	ERR4677873	NA	11.3732	TRUE
Mozambique	NA	NA	SPT53043	NA	South East Africa	East Africa	AFRICA	TRUE	uncallable	uncallable	uncallable	uncallable	ERR4677874	NA	13.8377	TRUE
Mozambique	NA	NA	SPT53042	NA	South East Africa	East Africa	AFRICA	TRUE	uncallable	uncallable	uncallable	uncallable	ERR4677875	NA	21.4562	TRUE
Mozambique	NA	NA	SPT53041	NA	South East Africa	East Africa	AFRICA	TRUE	uncallable	uncallable	uncallable	uncallable	ERR4677876	NA	7.34075	TRUE
Mozambique	NA	NA	SPT53040	NA	South East Africa	East Africa	AFRICA	TRUE	uncallable	uncallable	uncallable	uncallable	ERR4677877	NA	12.9477	TRUE
Mozambique	NA	NA	SPT53038	NA	South East Africa	East Africa	AFRICA	TRUE	uncallable	uncallable	uncallable	uncallable	ERR4677878	NA	19.8687	TRUE
Mozambique	NA	NA	SPT53058	NA	South East Africa	East Africa	AFRICA	TRUE	uncallable	uncallable	uncallable	uncallable	ERR4677879	NA	15.4174	TRUE
Mozambique	NA	NA	SPT53039	NA	South East Africa	East Africa	AFRICA	TRUE	uncallable	uncallable	uncallable	uncallable	ERR4677880	NA	13.1886	TRUE
Mozambique	NA	NA	SPT53037	NA	South East Africa	East Africa	AFRICA	TRUE	uncallable	uncallable	uncallable	uncallable	ERR4677881	NA	7.27667	TRUE
Mozambique	NA	NA	SPT53054	NA	South East Africa	East Africa	AFRICA	TRUE	uncallable	uncallable	uncallable	uncallable	ERR4677882	NA	19.5274	TRUE
Mozambique	NA	NA	SPT51022	NA	South East Africa	East Africa	AFRICA	TRUE	uncallable	uncallable	uncallable	uncallable	ERR4695964	NA	10.3033	TRUE
Mozambique	NA	NA	SPT50983	NA	South East Africa	East Africa	AFRICA	TRUE	uncallable	uncallable	uncallable	uncallable	ERR4695965	NA	6.74547	TRUE
Mozambique	NA	NA	SPT51264	NA	South East Africa	East Africa	AFRICA	TRUE	uncallable	uncallable	uncallable	uncallable	ERR4695966	NA	2.73202	TRUE
Mozambique	NA	NA	SPT51377	NA	South East Africa	East Africa	AFRICA	TRUE	uncallable	uncallable	uncallable	uncallable	ERR4695967	NA	1.09232	TRUE
Mozambique	NA	NA	SPT51474	NA	South East Africa	East Africa	AFRICA	TRUE	uncallable	uncallable	uncallable	uncallable	ERR4695986	NA	51.9784	TRUE
Mozambique	NA	NA	SPT51453	NA	South East Africa	East Africa	AFRICA	TRUE	uncallable	uncallable	uncallable	uncallable	ERR4695987	NA	41.9306	TRUE
Mozambique	NA	NA	SPT51452	NA	South East Africa	East Africa	AFRICA	TRUE	uncallable	uncallable	uncallable	uncallable	ERR4695988	NA	7.55863	TRUE
Mozambique	NA	NA	SPT51458	NA	South East Africa	East Africa	AFRICA	TRUE	uncallable	uncallable	uncallable	uncallable	ERR4695989	NA	72.8016	TRUE
Mozambique	NA	NA	SPT51516	NA	South East Africa	East Africa	AFRICA	TRUE	uncallable	uncallable	uncallable	uncallable	ERR4695990	NA	13.1735	TRUE
Mozambique	NA	NA	SPT51520	NA	South East Africa	East Africa	AFRICA	TRUE	uncallable	uncallable	uncallable	uncallable	ERR4695991	NA	85.3384	TRUE
Mozambique	NA	NA	SPT51519	NA	South East Africa	East Africa	AFRICA	TRUE	uncallable	uncallable	uncallable	uncallable	ERR4695992	NA	70.6819	TRUE
Mozambique	NA	NA	SPT51548	NA	South East Africa	East Africa	AFRICA	TRUE	uncallable	uncallable	uncallable	uncallable	ERR4695993	NA	26.1956	TRUE
Mozambique	NA	NA	SPT51549	NA	South East Africa	East Africa	AFRICA	TRUE	uncallable	uncallable	uncallable	uncallable	ERR4695994	NA	47.3538	TRUE
Mozambique	NA	NA	SPT51552	NA	South East Africa	East Africa	AFRICA	TRUE	uncallable	uncallable	uncallable	uncallable	ERR4695995	NA	52.0361	TRUE
Mozambique	NA	NA	SPT51539	NA	South East Africa	East Africa	AFRICA	TRUE	uncallable	uncallable	uncallable	uncallable	ERR4695996	NA	67.0584	TRUE
Mozambique	NA	NA	SPT51544	NA	South East Africa	East Africa	AFRICA	TRUE	uncallable	uncallable	uncallable	uncallable	ERR4695997	NA	13.705	TRUE
Mozambique	NA	NA	SPT51555	NA	South East Africa	East Africa	AFRICA	TRUE	uncallable	uncallable	uncallable	uncallable	ERR4695998	NA	65.3879	TRUE
Mozambique	NA	NA	SPT51558	NA	South East Africa	East Africa	AFRICA	TRUE	uncallable	uncallable	uncallable	uncallable	ERR4695999	NA	48.4196	TRUE
Mozambique	NA	NA	SPT51559	NA	South East Africa	East Africa	AFRICA	TRUE	uncallable	uncallable	uncallable	uncallable	ERR4696000	NA	5.36298	TRUE
Mozambique	NA	NA	SPT51560	NA	South East Africa	East Africa	AFRICA	TRUE	uncallable	uncallable	uncallable	uncallable	ERR4696001	NA	113.405	TRUE
Mozambique	NA	NA	SPT51522	NA	South East Africa	East Africa	AFRICA	TRUE	uncallable	uncallable	uncallable	uncallable	ERR4696002	NA	89.4852	TRUE
Mozambique	NA	NA	SPT51523	NA	South East Africa	East Africa	AFRICA	TRUE	uncallable	uncallable	uncallable	uncallable	ERR4696003	NA	73.6149	TRUE
Mozambique	NA	NA	SPT51525	NA	South East Africa	East Africa	AFRICA	TRUE	uncallable	uncallable	uncallable	uncallable	ERR4696004	NA	1.85343	TRUE
Mozambique	NA	NA	SPT52523	NA	South East Africa	East Africa	AFRICA	TRUE	uncallable	uncallable	uncallable	uncallable	ERR4696006	NA	2.44818	TRUE
Mozambique	NA	NA	SPT53084	NA	South East Africa	East Africa	AFRICA	TRUE	uncallable	uncallable	uncallable	uncallable	ERR4696007	NA	29.2164	TRUE
Mozambique	NA	NA	SPT54385	NA	South East Africa	East Africa	AFRICA	TRUE	uncallable	uncallable	uncallable	uncallable	ERR6197051	NA	5.33895	TRUE
Mozambique	NA	NA	SPT54386	NA	South East Africa	East Africa	AFRICA	TRUE	uncallable	uncallable	uncallable	uncallable	ERR6197052	NA	33.1894	TRUE
Mozambique	NA	NA	SPT54387	NA	South East Africa	East Africa	AFRICA	TRUE	uncallable	uncallable	uncallable	uncallable	ERR6197053	NA	58.8648	TRUE
Mozambique	NA	NA	SPT54388	NA	South East Africa	East Africa	AFRICA	TRUE	uncallable	uncallable	uncallable	uncallable	ERR6197054	NA	44.854	TRUE
Mozambique	NA	NA	SPT54389	NA	South East Africa	East Africa	AFRICA	TRUE	uncallable	uncallable	uncallable	uncallable	ERR6197055	NA	3.89228	TRUE
Mozambique	NA	NA	SPT54394	NA	South East Africa	East Africa	AFRICA	TRUE	uncallable	uncallable	uncallable	uncallable	ERR6197056	NA	29.0473	TRUE
Mozambique	NA	NA	SPT54395	NA	South East Africa	East Africa	AFRICA	TRUE	uncallable	uncallable	uncallable	uncallable	ERR6197057	NA	92.1163	TRUE
Mozambique	NA	NA	SPT54396	NA	South East Africa	East Africa	AFRICA	TRUE	uncallable	uncallable	uncallable	uncallable	ERR6197058	NA	1.80462	TRUE
Mozambique	NA	NA	SPT54397	NA	South East Africa	East Africa	AFRICA	TRUE	uncallable	uncallable	uncallable	uncallable	ERR6197059	NA	53.5229	TRUE
Mozambique	NA	NA	SPT54401	NA	South East Africa	East Africa	AFRICA	TRUE	uncallable	uncallable	uncallable	uncallable	ERR6197060	NA	27.9118	TRUE
Mozambique	NA	NA	SPT54402	NA	South East Africa	East Africa	AFRICA	TRUE	uncallable	uncallable	uncallable	uncallable	ERR6197061	NA	56.3084	TRUE
Mozambique	NA	NA	SPT54403	NA	South East Africa	East Africa	AFRICA	TRUE	uncallable	uncallable	uncallable	uncallable	ERR6197062	NA	66.7935	TRUE
Mozambique	NA	NA	SPT54406	NA	South East Africa	East Africa	AFRICA	TRUE	uncallable	uncallable	uncallable	uncallable	ERR6197063	NA	40.3962	TRUE
Mozambique	NA	NA	SPT54407	NA	South East Africa	East Africa	AFRICA	TRUE	uncallable	uncallable	uncallable	uncallable	ERR6197064	NA	83.9349	TRUE
Mozambique	NA	NA	SPT54409	NA	South East Africa	East Africa	AFRICA	TRUE	uncallable	uncallable	uncallable	uncallable	ERR6197065	NA	56.8602	TRUE
Mozambique	NA	NA	SPT54410	NA	South East Africa	East Africa	AFRICA	TRUE	uncallable	uncallable	uncallable	uncallable	ERR6197066	NA	33.008	TRUE
Mozambique	NA	NA	SPT54411	NA	South East Africa	East Africa	AFRICA	TRUE	uncallable	uncallable	uncallable	uncallable	ERR6197067	NA	18.3343	TRUE
Mozambique	NA	NA	SPT54412	NA	South East Africa	East Africa	AFRICA	TRUE	uncallable	uncallable	uncallable	uncallable	ERR6197068	NA	9.50891	TRUE
Mozambique	NA	NA	SPT54413	NA	South East Africa	East Africa	AFRICA	TRUE	uncallable	uncallable	uncallable	uncallable	ERR6197069	NA	34.5016	TRUE
Mozambique	NA	NA	SPT54414	NA	South East Africa	East Africa	AFRICA	TRUE	uncallable	uncallable	uncallable	uncallable	ERR6197070	NA	39.6508	TRUE
Mozambique	NA	NA	SPT54415	NA	South East Africa	East Africa	AFRICA	TRUE	uncallable	uncallable	uncallable	uncallable	ERR6197071	NA	11.8558	TRUE
Mozambique	NA	NA	SPT54416	NA	South East Africa	East Africa	AFRICA	TRUE	uncallable	uncallable	uncallable	uncallable	ERR6197072	NA	20.8316	TRUE
Mozambique	NA	NA	SPT54417	NA	South East Africa	East Africa	AFRICA	TRUE	uncallable	uncallable	uncallable	uncallable	ERR6197073	NA	42.1584	TRUE
Mozambique	NA	NA	SPT54418	NA	South East Africa	East Africa	AFRICA	TRUE	uncallable	uncallable	uncallable	uncallable	ERR6197074	NA	10.1532	TRUE
Mozambique	NA	NA	SPT54419	NA	South East Africa	East Africa	AFRICA	TRUE	uncallable	uncallable	uncallable	uncallable	ERR6197075	NA	0.670876	TRUE
Mozambique	NA	NA	SPT54420	NA	South East Africa	East Africa	AFRICA	TRUE	uncallable	uncallable	uncallable	uncallable	ERR6197076	NA	28.5802	TRUE
Mozambique	NA	NA	SPT54421	NA	South East Africa	East Africa	AFRICA	TRUE	uncallable	uncallable	uncallable	uncallable	ERR6197077	NA	72.8752	TRUE
Mozambique	NA	NA	SPT54423	NA	South East Africa	East Africa	AFRICA	TRUE	uncallable	uncallable	uncallable	uncallable	ERR6197078	NA	61.5112	TRUE
Mozambique	NA	NA	SPT54425	NA	South East Africa	East Africa	AFRICA	TRUE	uncallable	uncallable	uncallable	uncallable	ERR6197079	NA	0.900087	TRUE
Mozambique	NA	NA	SPT54426	NA	South East Africa	East Africa	AFRICA	TRUE	uncallable	uncallable	uncallable	uncallable	ERR6197080	NA	12.5484	TRUE
Mozambique	NA	NA	SPT54428	NA	South East Africa	East Africa	AFRICA	TRUE	uncallable	uncallable	uncallable	uncallable	ERR6197081	NA	36.1874	TRUE
Mozambique	NA	NA	SPT54429	NA	South East Africa	East Africa	AFRICA	TRUE	uncallable	uncallable	uncallable	uncallable	ERR6197082	NA	4.96942	TRUE
Mozambique	NA	NA	SPT54430	NA	South East Africa	East Africa	AFRICA	TRUE	uncallable	uncallable	uncallable	uncallable	ERR6197083	NA	9.21994	TRUE
Mozambique	NA	NA	SPT54431	NA	South East Africa	East Africa	AFRICA	TRUE	uncallable	uncallable	uncallable	uncallable	ERR6197084	NA	25.0805	TRUE
Mozambique	NA	NA	SPT54432	NA	South East Africa	East Africa	AFRICA	TRUE	uncallable	uncallable	uncallable	uncallable	ERR6197085	NA	45.9209	TRUE
Mozambique	NA	NA	SPT54434	NA	South East Africa	East Africa	AFRICA	TRUE	uncallable	uncallable	uncallable	uncallable	ERR6197086	NA	69.1121	TRUE
Mozambique	NA	NA	SPT54435	NA	South East Africa	East Africa	AFRICA	TRUE	uncallable	uncallable	uncallable	uncallable	ERR6197087	NA	64.2936	TRUE
Mozambique	NA	NA	SPT54436	NA	South East Africa	East Africa	AFRICA	TRUE	uncallable	uncallable	uncallable	uncallable	ERR6197088	NA	44.6055	TRUE
Mozambique	NA	NA	SPT54438	NA	South East Africa	East Africa	AFRICA	TRUE	uncallable	uncallable	uncallable	uncallable	ERR6197089	NA	36.5631	TRUE
Mozambique	NA	NA	SPT54439	NA	South East Africa	East Africa	AFRICA	TRUE	uncallable	uncallable	uncallable	uncallable	ERR6197090	NA	119.641	TRUE
Mozambique	NA	NA	SPT54440	NA	South East Africa	East Africa	AFRICA	TRUE	uncallable	uncallable	uncallable	uncallable	ERR6197091	NA	46.4152	TRUE
Mozambique	NA	NA	SPT54441	NA	South East Africa	East Africa	AFRICA	TRUE	uncallable	uncallable	uncallable	uncallable	ERR6197092	NA	71.7648	TRUE
Mozambique	NA	NA	SPT54442	NA	South East Africa	East Africa	AFRICA	TRUE	uncallable	uncallable	uncallable	uncallable	ERR6197093	NA	69.1478	TRUE
Mozambique	NA	NA	SPT54443	NA	South East Africa	East Africa	AFRICA	TRUE	uncallable	uncallable	uncallable	uncallable	ERR6197094	NA	40.9954	TRUE
Mozambique	NA	NA	SPT54444	NA	South East Africa	East Africa	AFRICA	TRUE	uncallable	uncallable	uncallable	uncallable	ERR6197095	NA	35.1212	TRUE
Mozambique	NA	NA	SPT54445	NA	South East Africa	East Africa	AFRICA	TRUE	uncallable	uncallable	uncallable	uncallable	ERR6197096	NA	38.5765	TRUE
Mozambique	NA	NA	SPT54446	NA	South East Africa	East Africa	AFRICA	TRUE	uncallable	uncallable	uncallable	uncallable	ERR6197097	NA	62.9429	TRUE
Mozambique	NA	NA	SPT54447	NA	South East Africa	East Africa	AFRICA	TRUE	uncallable	uncallable	uncallable	uncallable	ERR6197098	NA	6.56787	TRUE
Mozambique	NA	NA	SPT54450	NA	South East Africa	East Africa	AFRICA	TRUE	uncallable	uncallable	uncallable	uncallable	ERR6197099	NA	87.1338	TRUE
Mozambique	NA	NA	SPT54451	NA	South East Africa	East Africa	AFRICA	TRUE	uncallable	uncallable	uncallable	uncallable	ERR6197100	NA	87.9548	TRUE
Mozambique	NA	NA	SPT54452	NA	South East Africa	East Africa	AFRICA	TRUE	uncallable	uncallable	uncallable	uncallable	ERR6197101	NA	21.9897	TRUE
Mozambique	NA	NA	SPT54453	NA	South East Africa	East Africa	AFRICA	TRUE	uncallable	uncallable	uncallable	uncallable	ERR6197102	NA	70.5477	TRUE
Mozambique	NA	NA	SPT54454	NA	South East Africa	East Africa	AFRICA	TRUE	uncallable	uncallable	uncallable	uncallable	ERR6197103	NA	89.1312	TRUE
Mozambique	NA	NA	SPT54455	NA	South East Africa	East Africa	AFRICA	TRUE	uncallable	uncallable	uncallable	uncallable	ERR6197104	NA	85.5363	TRUE
Mozambique	NA	NA	SPT54456	NA	South East Africa	East Africa	AFRICA	TRUE	uncallable	uncallable	uncallable	uncallable	ERR6197105	NA	58.25	TRUE
Mozambique	NA	NA	SPT54457	NA	South East Africa	East Africa	AFRICA	TRUE	uncallable	uncallable	uncallable	uncallable	ERR6197106	NA	17.6986	TRUE
Mozambique	NA	NA	SPT54458	NA	South East Africa	East Africa	AFRICA	TRUE	uncallable	uncallable	uncallable	uncallable	ERR6197107	NA	47.1092	TRUE
Mozambique	NA	NA	SPT54459	NA	South East Africa	East Africa	AFRICA	TRUE	uncallable	uncallable	uncallable	uncallable	ERR6197108	NA	70.7051	TRUE
Mozambique	NA	NA	SPT54460	NA	South East Africa	East Africa	AFRICA	TRUE	uncallable	uncallable	uncallable	uncallable	ERR6197109	NA	75.1926	TRUE
Mozambique	NA	NA	SPT54461	NA	South East Africa	East Africa	AFRICA	TRUE	uncallable	uncallable	uncallable	uncallable	ERR6197110	NA	60.8388	TRUE
Mozambique	NA	NA	SPT54462	NA	South East Africa	East Africa	AFRICA	TRUE	uncallable	uncallable	uncallable	uncallable	ERR6197111	NA	23.8854	TRUE
Mozambique	NA	NA	SPT54463	NA	South East Africa	East Africa	AFRICA	TRUE	uncallable	uncallable	uncallable	uncallable	ERR6197112	NA	134.25	TRUE
Mozambique	NA	NA	SPT54464	NA	South East Africa	East Africa	AFRICA	TRUE	uncallable	uncallable	uncallable	uncallable	ERR6197113	NA	17.9488	TRUE
Mozambique	NA	NA	SPT54465	NA	South East Africa	East Africa	AFRICA	TRUE	uncallable	uncallable	uncallable	uncallable	ERR6197114	NA	58.3775	TRUE
Mozambique	NA	NA	SPT54466	NA	South East Africa	East Africa	AFRICA	TRUE	uncallable	uncallable	uncallable	uncallable	ERR6197115	NA	29.1813	TRUE
Mozambique	NA	NA	SPT54467	NA	South East Africa	East Africa	AFRICA	TRUE	uncallable	uncallable	uncallable	uncallable	ERR6197116	NA	67.2837	TRUE
Mozambique	NA	NA	SPT54470	NA	South East Africa	East Africa	AFRICA	TRUE	uncallable	uncallable	uncallable	uncallable	ERR6197117	NA	40.83	TRUE
Mozambique	NA	NA	SPT54471	NA	South East Africa	East Africa	AFRICA	TRUE	uncallable	uncallable	uncallable	uncallable	ERR6197118	NA	15.6535	TRUE
Mozambique	NA	NA	SPT54472	NA	South East Africa	East Africa	AFRICA	TRUE	uncallable	uncallable	uncallable	uncallable	ERR6197119	NA	34.3518	TRUE
Mozambique	NA	NA	SPT54473	NA	South East Africa	East Africa	AFRICA	TRUE	uncallable	uncallable	uncallable	uncallable	ERR6197120	NA	0.190721	TRUE
Mozambique	NA	NA	SPT54474	NA	South East Africa	East Africa	AFRICA	TRUE	uncallable	uncallable	uncallable	uncallable	ERR6197121	NA	50.5888	TRUE
Mozambique	NA	NA	SPT54475	NA	South East Africa	East Africa	AFRICA	TRUE	uncallable	uncallable	uncallable	uncallable	ERR6197122	NA	5.29868	TRUE
Mozambique	NA	NA	SPT54477	NA	South East Africa	East Africa	AFRICA	TRUE	uncallable	uncallable	uncallable	uncallable	ERR6197123	NA	49.2317	TRUE
Mozambique	NA	NA	SPT54479	NA	South East Africa	East Africa	AFRICA	TRUE	uncallable	uncallable	uncallable	uncallable	ERR6197124	NA	49.3451	TRUE
Mozambique	NA	NA	SPT54480	NA	South East Africa	East Africa	AFRICA	TRUE	uncallable	uncallable	uncallable	uncallable	ERR6197125	NA	42.3628	TRUE
Mozambique	NA	NA	SPT54535	NA	South East Africa	East Africa	AFRICA	TRUE	uncallable	uncallable	uncallable	uncallable	ERR6197126	NA	79.8491	TRUE
Mozambique	NA	NA	SPT54536	NA	South East Africa	East Africa	AFRICA	TRUE	uncallable	uncallable	uncallable	uncallable	ERR6197127	NA	53.5012	TRUE
Mozambique	NA	NA	SPT54538	NA	South East Africa	East Africa	AFRICA	TRUE	uncallable	uncallable	uncallable	uncallable	ERR6197128	NA	65.2416	TRUE
Mozambique	NA	NA	SPT54539	NA	South East Africa	East Africa	AFRICA	TRUE	uncallable	uncallable	uncallable	uncallable	ERR6197129	NA	16.3388	TRUE
Mozambique	NA	NA	SPT54540	NA	South East Africa	East Africa	AFRICA	TRUE	uncallable	uncallable	uncallable	uncallable	ERR6197130	NA	47.2294	TRUE
Mozambique	NA	NA	SPT54541	NA	South East Africa	East Africa	AFRICA	TRUE	uncallable	uncallable	uncallable	uncallable	ERR6197131	NA	81.2532	TRUE
Mozambique	NA	NA	SPT54542	NA	South East Africa	East Africa	AFRICA	TRUE	uncallable	uncallable	uncallable	uncallable	ERR6197132	NA	5.29651	TRUE
Mozambique	NA	NA	SPT54543	NA	South East Africa	East Africa	AFRICA	TRUE	uncallable	uncallable	uncallable	uncallable	ERR6197133	NA	185.816	TRUE
Mozambique	NA	NA	SPT54544	NA	South East Africa	East Africa	AFRICA	TRUE	uncallable	uncallable	uncallable	uncallable	ERR6197134	NA	15.5752	TRUE
Mozambique	NA	NA	SPT54545	NA	South East Africa	East Africa	AFRICA	TRUE	uncallable	uncallable	uncallable	uncallable	ERR6197135	NA	34.297	TRUE
Mozambique	NA	NA	SPT54546	NA	South East Africa	East Africa	AFRICA	TRUE	uncallable	uncallable	uncallable	uncallable	ERR6197136	NA	38.6775	TRUE
Mozambique	NA	NA	SPT54547	NA	South East Africa	East Africa	AFRICA	TRUE	uncallable	uncallable	uncallable	uncallable	ERR6197137	NA	68.3235	TRUE
Mozambique	NA	NA	SPT54548	NA	South East Africa	East Africa	AFRICA	TRUE	uncallable	uncallable	uncallable	uncallable	ERR6197138	NA	28.5952	TRUE
Mozambique	NA	NA	SPT54550	NA	South East Africa	East Africa	AFRICA	TRUE	uncallable	uncallable	uncallable	uncallable	ERR6197139	NA	18.7574	TRUE
Mozambique	NA	NA	SPT54551	NA	South East Africa	East Africa	AFRICA	TRUE	uncallable	uncallable	uncallable	uncallable	ERR6197140	NA	79.5324	TRUE
Mozambique	NA	NA	SPT54552	NA	South East Africa	East Africa	AFRICA	TRUE	uncallable	uncallable	uncallable	uncallable	ERR6197141	NA	67.964	TRUE
Mozambique	NA	NA	SPT54553	NA	South East Africa	East Africa	AFRICA	TRUE	uncallable	uncallable	uncallable	uncallable	ERR6197142	NA	118.874	TRUE
Mozambique	NA	NA	SPT54554	NA	South East Africa	East Africa	AFRICA	TRUE	uncallable	uncallable	uncallable	uncallable	ERR6197143	NA	47.9764	TRUE
Mozambique	NA	NA	SPT54555	NA	South East Africa	East Africa	AFRICA	TRUE	uncallable	uncallable	uncallable	uncallable	ERR6197144	NA	23.6675	TRUE
Mozambique	NA	NA	SPT54556	NA	South East Africa	East Africa	AFRICA	TRUE	uncallable	uncallable	uncallable	uncallable	ERR6197145	NA	25.0271	TRUE
Mozambique	NA	NA	SPT54557	NA	South East Africa	East Africa	AFRICA	TRUE	uncallable	uncallable	uncallable	uncallable	ERR6197146	NA	12.9675	TRUE
Mozambique	NA	NA	SPT54558	NA	South East Africa	East Africa	AFRICA	TRUE	uncallable	uncallable	uncallable	uncallable	ERR6197147	NA	54.6999	TRUE
Mozambique	NA	NA	SPT54559	NA	South East Africa	East Africa	AFRICA	TRUE	uncallable	uncallable	uncallable	uncallable	ERR6197148	NA	89.1042	TRUE
Mozambique	NA	NA	SPT54549	NA	South East Africa	East Africa	AFRICA	TRUE	uncallable	uncallable	uncallable	uncallable	ERR6197149	NA	0.514498	TRUE
Mozambique	NA	NA	SPT54800	NA	South East Africa	East Africa	AFRICA	TRUE	uncallable	uncallable	uncallable	uncallable	ERR6197150	NA	0.19047	TRUE
Mozambique	NA	NA	SPT54508	NA	South East Africa	East Africa	AFRICA	TRUE	uncallable	uncallable	uncallable	uncallable	ERR6197151	NA	32.2503	TRUE
Mozambique	NA	NA	SPT54510	NA	South East Africa	East Africa	AFRICA	TRUE	uncallable	uncallable	uncallable	uncallable	ERR6197152	NA	19.5643	TRUE
Mozambique	NA	NA	SPT54511	NA	South East Africa	East Africa	AFRICA	TRUE	uncallable	uncallable	uncallable	uncallable	ERR6197153	NA	107.719	TRUE
Mozambique	NA	NA	SPT54512	NA	South East Africa	East Africa	AFRICA	TRUE	uncallable	uncallable	uncallable	uncallable	ERR6197154	NA	27.4166	TRUE
Mozambique	NA	NA	SPT54513	NA	South East Africa	East Africa	AFRICA	TRUE	uncallable	uncallable	uncallable	uncallable	ERR6197155	NA	61.7305	TRUE
Mozambique	NA	NA	SPT54514	NA	South East Africa	East Africa	AFRICA	TRUE	uncallable	uncallable	uncallable	uncallable	ERR6197156	NA	57.458	TRUE
Mozambique	NA	NA	SPT54515	NA	South East Africa	East Africa	AFRICA	TRUE	uncallable	uncallable	uncallable	uncallable	ERR6197157	NA	0.2022	TRUE
Mozambique	NA	NA	SPT54516	NA	South East Africa	East Africa	AFRICA	TRUE	uncallable	uncallable	uncallable	uncallable	ERR6197158	NA	31.8912	TRUE
Mozambique	NA	NA	SPT54517	NA	South East Africa	East Africa	AFRICA	TRUE	uncallable	uncallable	uncallable	uncallable	ERR6197159	NA	7.64812	TRUE
Mozambique	NA	NA	SPT54518	NA	South East Africa	East Africa	AFRICA	TRUE	uncallable	uncallable	uncallable	uncallable	ERR6197160	NA	690.717	TRUE
Mozambique	NA	NA	SPT54519	NA	South East Africa	East Africa	AFRICA	TRUE	uncallable	uncallable	uncallable	uncallable	ERR6197161	NA	50.1163	TRUE
Mozambique	NA	NA	SPT54520	NA	South East Africa	East Africa	AFRICA	TRUE	uncallable	uncallable	uncallable	uncallable	ERR6197162	NA	13.6051	TRUE
Mozambique	NA	NA	SPT54521	NA	South East Africa	East Africa	AFRICA	TRUE	uncallable	uncallable	uncallable	uncallable	ERR6197163	NA	183.23	TRUE
Mozambique	NA	NA	SPT54522	NA	South East Africa	East Africa	AFRICA	TRUE	uncallable	uncallable	uncallable	uncallable	ERR6197164	NA	69.3756	TRUE
Mozambique	NA	NA	SPT54523	NA	South East Africa	East Africa	AFRICA	TRUE	uncallable	uncallable	uncallable	uncallable	ERR6197165	NA	63.3051	TRUE
Mozambique	NA	NA	SPT54524	NA	South East Africa	East Africa	AFRICA	TRUE	uncallable	uncallable	uncallable	uncallable	ERR6197166	NA	30.9286	TRUE
Mozambique	NA	NA	SPT54525	NA	South East Africa	East Africa	AFRICA	TRUE	uncallable	uncallable	uncallable	uncallable	ERR6197167	NA	26.5763	TRUE
Mozambique	NA	NA	SPT54526	NA	South East Africa	East Africa	AFRICA	TRUE	uncallable	uncallable	uncallable	uncallable	ERR6197168	NA	8.12065	TRUE
Mozambique	NA	NA	SPT54527	NA	South East Africa	East Africa	AFRICA	TRUE	uncallable	uncallable	uncallable	uncallable	ERR6197169	NA	55.0205	TRUE
Mozambique	NA	NA	SPT54528	NA	South East Africa	East Africa	AFRICA	TRUE	uncallable	uncallable	uncallable	uncallable	ERR6197170	NA	46.822	TRUE
Mozambique	NA	NA	SPT54529	NA	South East Africa	East Africa	AFRICA	TRUE	uncallable	uncallable	uncallable	uncallable	ERR6197171	NA	53.7497	TRUE
Mozambique	NA	NA	SPT54530	NA	South East Africa	East Africa	AFRICA	TRUE	uncallable	uncallable	uncallable	uncallable	ERR6197172	NA	47.5708	TRUE
Mozambique	NA	NA	SPT54532	NA	South East Africa	East Africa	AFRICA	TRUE	uncallable	uncallable	uncallable	uncallable	ERR6197173	NA	6.59767	TRUE
Mozambique	NA	NA	SPT54533	NA	South East Africa	East Africa	AFRICA	TRUE	uncallable	uncallable	uncallable	uncallable	ERR6197174	NA	2.91448	TRUE
Mozambique	NA	NA	SPT54534	NA	South East Africa	East Africa	AFRICA	TRUE	uncallable	uncallable	uncallable	uncallable	ERR6197175	NA	40.3512	TRUE
Mozambique	NA	NA	SPT54481	NA	South East Africa	East Africa	AFRICA	TRUE	uncallable	uncallable	uncallable	uncallable	ERR6197176	NA	77.3238	TRUE
Mozambique	NA	NA	SPT54482	NA	South East Africa	East Africa	AFRICA	TRUE	uncallable	uncallable	uncallable	uncallable	ERR6197177	NA	53.0632	TRUE
Mozambique	NA	NA	SPT54483	NA	South East Africa	East Africa	AFRICA	TRUE	uncallable	uncallable	uncallable	uncallable	ERR6197178	NA	31.0273	TRUE
Mozambique	NA	NA	SPT54484	NA	South East Africa	East Africa	AFRICA	TRUE	uncallable	uncallable	uncallable	uncallable	ERR6197179	NA	44.569	TRUE
Mozambique	NA	NA	SPT54486	NA	South East Africa	East Africa	AFRICA	TRUE	uncallable	uncallable	uncallable	uncallable	ERR6197180	NA	24.0989	TRUE
Mozambique	NA	NA	SPT54487	NA	South East Africa	East Africa	AFRICA	TRUE	uncallable	uncallable	uncallable	uncallable	ERR6197181	NA	55.1317	TRUE
Mozambique	NA	NA	SPT54488	NA	South East Africa	East Africa	AFRICA	TRUE	uncallable	uncallable	uncallable	uncallable	ERR6197182	NA	37.7558	TRUE
Mozambique	NA	NA	SPT54489	NA	South East Africa	East Africa	AFRICA	TRUE	uncallable	uncallable	uncallable	uncallable	ERR6197183	NA	81.2614	TRUE
Mozambique	NA	NA	SPT54490	NA	South East Africa	East Africa	AFRICA	TRUE	uncallable	uncallable	uncallable	uncallable	ERR6197184	NA	26.05	TRUE
Mozambique	NA	NA	SPT54491	NA	South East Africa	East Africa	AFRICA	TRUE	uncallable	uncallable	uncallable	uncallable	ERR6197185	NA	29.5756	TRUE
Mozambique	NA	NA	SPT54493	NA	South East Africa	East Africa	AFRICA	TRUE	uncallable	uncallable	uncallable	uncallable	ERR6197186	NA	6.1335	TRUE
Mozambique	NA	NA	SPT54494	NA	South East Africa	East Africa	AFRICA	TRUE	uncallable	uncallable	uncallable	uncallable	ERR6197187	NA	25.8539	TRUE
Mozambique	NA	NA	SPT54495	NA	South East Africa	East Africa	AFRICA	TRUE	uncallable	uncallable	uncallable	uncallable	ERR6197188	NA	79.5051	TRUE
Mozambique	NA	NA	SPT54496	NA	South East Africa	East Africa	AFRICA	TRUE	uncallable	uncallable	uncallable	uncallable	ERR6197189	NA	33.9735	TRUE
Mozambique	NA	NA	SPT54497	NA	South East Africa	East Africa	AFRICA	TRUE	uncallable	uncallable	uncallable	uncallable	ERR6197190	NA	9.37193	TRUE
Mozambique	NA	NA	SPT54498	NA	South East Africa	East Africa	AFRICA	TRUE	uncallable	uncallable	uncallable	uncallable	ERR6197191	NA	206.188	TRUE
Mozambique	NA	NA	SPT54499	NA	South East Africa	East Africa	AFRICA	TRUE	uncallable	uncallable	uncallable	uncallable	ERR6197192	NA	38.0875	TRUE
Mozambique	NA	NA	SPT54500	NA	South East Africa	East Africa	AFRICA	TRUE	uncallable	uncallable	uncallable	uncallable	ERR6197193	NA	5.82584	TRUE
Mozambique	NA	NA	SPT54501	NA	South East Africa	East Africa	AFRICA	TRUE	uncallable	uncallable	uncallable	uncallable	ERR6197194	NA	80.338	TRUE
Mozambique	NA	NA	SPT54502	NA	South East Africa	East Africa	AFRICA	TRUE	uncallable	uncallable	uncallable	uncallable	ERR6197195	NA	2.60627	TRUE
Mozambique	NA	NA	SPT54503	NA	South East Africa	East Africa	AFRICA	TRUE	uncallable	uncallable	uncallable	uncallable	ERR6197196	NA	62.8685	TRUE
Mozambique	NA	NA	SPT54504	NA	South East Africa	East Africa	AFRICA	TRUE	uncallable	uncallable	uncallable	uncallable	ERR6197197	NA	24.4932	TRUE
Mozambique	NA	NA	SPT54505	NA	South East Africa	East Africa	AFRICA	TRUE	uncallable	uncallable	uncallable	uncallable	ERR6197198	NA	19.0377	TRUE
Mozambique	NA	NA	SPT54506	NA	South East Africa	East Africa	AFRICA	TRUE	uncallable	uncallable	uncallable	uncallable	ERR6197199	NA	76.2562	TRUE
Mozambique	NA	NA	SPT54507	NA	South East Africa	East Africa	AFRICA	TRUE	uncallable	uncallable	uncallable	uncallable	ERR6197200	NA	99.106	TRUE
Mozambique	NA	NA	SPT54561	NA	South East Africa	East Africa	AFRICA	TRUE	uncallable	uncallable	uncallable	uncallable	ERR6197201	NA	228.104	TRUE
Mozambique	NA	NA	SPT54570	NA	South East Africa	East Africa	AFRICA	TRUE	uncallable	uncallable	uncallable	uncallable	ERR6197202	NA	54.263	TRUE
Mozambique	NA	NA	SPT54573	NA	South East Africa	East Africa	AFRICA	TRUE	uncallable	uncallable	uncallable	uncallable	ERR6197203	NA	57.1813	TRUE
Mozambique	NA	NA	SPT54576	NA	South East Africa	East Africa	AFRICA	TRUE	uncallable	uncallable	uncallable	uncallable	ERR6197204	NA	86.176	TRUE
Mozambique	NA	NA	SPT54578	NA	South East Africa	East Africa	AFRICA	TRUE	uncallable	uncallable	uncallable	uncallable	ERR6197205	NA	41.7052	TRUE
Mozambique	NA	NA	SPT54579	NA	South East Africa	East Africa	AFRICA	TRUE	uncallable	uncallable	uncallable	uncallable	ERR6197206	NA	47.6746	TRUE
Mozambique	NA	NA	SPT54580	NA	South East Africa	East Africa	AFRICA	TRUE	uncallable	uncallable	uncallable	uncallable	ERR6197207	NA	66.7698	TRUE
Mozambique	NA	NA	SPT54589	NA	South East Africa	East Africa	AFRICA	TRUE	uncallable	uncallable	uncallable	uncallable	ERR6197208	NA	99.5832	TRUE
Mozambique	NA	NA	SPT54590	NA	South East Africa	East Africa	AFRICA	TRUE	uncallable	uncallable	uncallable	uncallable	ERR6197209	NA	15.3014	TRUE
Mozambique	NA	NA	SPT54605	NA	South East Africa	East Africa	AFRICA	TRUE	uncallable	uncallable	uncallable	uncallable	ERR6197210	NA	64.6749	TRUE
Mozambique	NA	NA	SPT54607	NA	South East Africa	East Africa	AFRICA	TRUE	uncallable	uncallable	uncallable	uncallable	ERR6197211	NA	87.5036	TRUE
Mozambique	NA	NA	SPT54608	NA	South East Africa	East Africa	AFRICA	TRUE	uncallable	uncallable	uncallable	uncallable	ERR6197212	NA	16.807	TRUE
Mozambique	NA	NA	SPT54609	NA	South East Africa	East Africa	AFRICA	TRUE	uncallable	uncallable	uncallable	uncallable	ERR6197213	NA	141.322	TRUE
Mozambique	NA	NA	SPT54610	NA	South East Africa	East Africa	AFRICA	TRUE	uncallable	uncallable	uncallable	uncallable	ERR6197214	NA	145.909	TRUE
Mozambique	NA	NA	SPT54612	NA	South East Africa	East Africa	AFRICA	TRUE	uncallable	uncallable	uncallable	uncallable	ERR6197215	NA	89.6266	TRUE
Mozambique	NA	NA	SPT54613	NA	South East Africa	East Africa	AFRICA	TRUE	uncallable	uncallable	uncallable	uncallable	ERR6197216	NA	2.11317	TRUE
Mozambique	NA	NA	SPT54614	NA	South East Africa	East Africa	AFRICA	TRUE	uncallable	uncallable	uncallable	uncallable	ERR6197217	NA	62.062	TRUE
Mozambique	NA	NA	SPT54615	NA	South East Africa	East Africa	AFRICA	TRUE	uncallable	uncallable	uncallable	uncallable	ERR6197218	NA	126.428	TRUE
Mozambique	NA	NA	SPT54618	NA	South East Africa	East Africa	AFRICA	TRUE	uncallable	uncallable	uncallable	uncallable	ERR6197219	NA	109.677	TRUE
Mozambique	NA	NA	SPT54619	NA	South East Africa	East Africa	AFRICA	TRUE	uncallable	uncallable	uncallable	uncallable	ERR6197220	NA	68.5253	TRUE
Mozambique	NA	NA	SPT54620	NA	South East Africa	East Africa	AFRICA	TRUE	uncallable	uncallable	uncallable	uncallable	ERR6197221	NA	309.197	TRUE
Mozambique	NA	NA	SPT54621	NA	South East Africa	East Africa	AFRICA	TRUE	uncallable	uncallable	uncallable	uncallable	ERR6197222	NA	92.6653	TRUE
Mozambique	NA	NA	SPT54622	NA	South East Africa	East Africa	AFRICA	TRUE	uncallable	uncallable	uncallable	uncallable	ERR6197223	NA	77.9063	TRUE
Mozambique	NA	NA	SPT54626	NA	South East Africa	East Africa	AFRICA	TRUE	uncallable	uncallable	uncallable	uncallable	ERR6197224	NA	81.099	TRUE
Mozambique	NA	NA	SPT54627	NA	South East Africa	East Africa	AFRICA	TRUE	uncallable	uncallable	uncallable	uncallable	ERR6197225	NA	8.74256	TRUE
Mozambique	NA	NA	SPT54628	NA	South East Africa	East Africa	AFRICA	TRUE	uncallable	uncallable	uncallable	uncallable	ERR6197226	NA	432.449	TRUE
Mozambique	NA	NA	SPT54631	NA	South East Africa	East Africa	AFRICA	TRUE	uncallable	uncallable	uncallable	uncallable	ERR6197227	NA	65.1476	TRUE
Mozambique	NA	NA	SPT54632	NA	South East Africa	East Africa	AFRICA	TRUE	uncallable	uncallable	uncallable	uncallable	ERR6197228	NA	110.564	TRUE
Mozambique	NA	NA	SPT54633	NA	South East Africa	East Africa	AFRICA	TRUE	uncallable	uncallable	uncallable	uncallable	ERR6197229	NA	60.3908	TRUE
Mozambique	NA	NA	SPT54634	NA	South East Africa	East Africa	AFRICA	TRUE	uncallable	uncallable	uncallable	uncallable	ERR6197230	NA	86.6626	TRUE
Mozambique	NA	NA	SPT54635	NA	South East Africa	East Africa	AFRICA	TRUE	uncallable	uncallable	uncallable	uncallable	ERR6197231	NA	89.2179	TRUE
Mozambique	NA	NA	SPT54636	NA	South East Africa	East Africa	AFRICA	TRUE	uncallable	uncallable	uncallable	uncallable	ERR6197232	NA	97.5774	TRUE
Mozambique	NA	NA	SPT54638	NA	South East Africa	East Africa	AFRICA	TRUE	uncallable	uncallable	uncallable	uncallable	ERR6197233	NA	44.5898	TRUE
Mozambique	NA	NA	SPT54639	NA	South East Africa	East Africa	AFRICA	TRUE	uncallable	uncallable	uncallable	uncallable	ERR6197234	NA	45.0209	TRUE
Mozambique	NA	NA	SPT54642	NA	South East Africa	East Africa	AFRICA	TRUE	uncallable	uncallable	uncallable	uncallable	ERR6197235	NA	69.3231	TRUE
Mozambique	NA	NA	SPT54643	NA	South East Africa	East Africa	AFRICA	TRUE	uncallable	uncallable	uncallable	uncallable	ERR6197236	NA	40.9767	TRUE
Mozambique	NA	NA	SPT54644	NA	South East Africa	East Africa	AFRICA	TRUE	uncallable	uncallable	uncallable	uncallable	ERR6197237	NA	92.5796	TRUE
Mozambique	NA	NA	SPT54649	NA	South East Africa	East Africa	AFRICA	TRUE	uncallable	uncallable	uncallable	uncallable	ERR6197238	NA	54.7852	TRUE
Mozambique	NA	NA	SPT54650	NA	South East Africa	East Africa	AFRICA	TRUE	uncallable	uncallable	uncallable	uncallable	ERR6197239	NA	68.051	TRUE
Mozambique	NA	NA	SPT54654	NA	South East Africa	East Africa	AFRICA	TRUE	uncallable	uncallable	uncallable	uncallable	ERR6197240	NA	116.105	TRUE
Mozambique	NA	NA	SPT54656	NA	South East Africa	East Africa	AFRICA	TRUE	uncallable	uncallable	uncallable	uncallable	ERR6197241	NA	48.8236	TRUE
Mozambique	NA	NA	SPT54657	NA	South East Africa	East Africa	AFRICA	TRUE	uncallable	uncallable	uncallable	uncallable	ERR6197242	NA	73.9918	TRUE
Mozambique	NA	NA	SPT54658	NA	South East Africa	East Africa	AFRICA	TRUE	uncallable	uncallable	uncallable	uncallable	ERR6197243	NA	80.1161	TRUE
Mozambique	NA	NA	SPT54659	NA	South East Africa	East Africa	AFRICA	TRUE	uncallable	uncallable	uncallable	uncallable	ERR6197244	NA	82.7123	TRUE
Mozambique	NA	NA	SPT54660	NA	South East Africa	East Africa	AFRICA	TRUE	uncallable	uncallable	uncallable	uncallable	ERR6197245	NA	39.0774	TRUE
Mozambique	NA	NA	SPT54661	NA	South East Africa	East Africa	AFRICA	TRUE	uncallable	uncallable	uncallable	uncallable	ERR6197246	NA	106.065	TRUE
Mozambique	NA	NA	SPT54662	NA	South East Africa	East Africa	AFRICA	TRUE	uncallable	uncallable	uncallable	uncallable	ERR6197247	NA	99.0254	TRUE
Mozambique	NA	NA	SPT54663	NA	South East Africa	East Africa	AFRICA	TRUE	uncallable	uncallable	uncallable	uncallable	ERR6197248	NA	127.888	TRUE
Mozambique	NA	NA	SPT54664	NA	South East Africa	East Africa	AFRICA	TRUE	uncallable	uncallable	uncallable	uncallable	ERR6197249	NA	111.756	TRUE
Mozambique	NA	NA	SPT54665	NA	South East Africa	East Africa	AFRICA	TRUE	uncallable	uncallable	uncallable	uncallable	ERR6197250	NA	117.096	TRUE
Mozambique	NA	NA	SPT54699	NA	South East Africa	East Africa	AFRICA	TRUE	uncallable	uncallable	uncallable	uncallable	ERR6279684	NA	76.9069	TRUE
Mozambique	NA	NA	SPT54700	NA	South East Africa	East Africa	AFRICA	TRUE	uncallable	uncallable	uncallable	uncallable	ERR6279685	NA	58.0024	TRUE
Mozambique	NA	NA	SPT54701	NA	South East Africa	East Africa	AFRICA	TRUE	uncallable	uncallable	uncallable	uncallable	ERR6279686	NA	19.3094	TRUE
Mozambique	NA	NA	SPT54702	NA	South East Africa	East Africa	AFRICA	TRUE	uncallable	uncallable	uncallable	uncallable	ERR6279687	NA	77.0357	TRUE
Mozambique	NA	NA	SPT54704	NA	South East Africa	East Africa	AFRICA	TRUE	uncallable	uncallable	uncallable	uncallable	ERR6279688	NA	41.1699	TRUE
Mozambique	NA	NA	SPT54705	NA	South East Africa	East Africa	AFRICA	TRUE	uncallable	uncallable	uncallable	uncallable	ERR6279689	NA	12.6915	TRUE
Mozambique	NA	NA	SPT54706	NA	South East Africa	East Africa	AFRICA	TRUE	uncallable	uncallable	uncallable	uncallable	ERR6279690	NA	62.157	TRUE
Mozambique	NA	NA	SPT54707	NA	South East Africa	East Africa	AFRICA	TRUE	uncallable	uncallable	uncallable	uncallable	ERR6279691	NA	51.7821	TRUE
Mozambique	NA	NA	SPT54708	NA	South East Africa	East Africa	AFRICA	TRUE	uncallable	uncallable	uncallable	uncallable	ERR6279692	NA	65.6606	TRUE
Mozambique	NA	NA	SPT54710	NA	South East Africa	East Africa	AFRICA	TRUE	uncallable	uncallable	uncallable	uncallable	ERR6279693	NA	38.4607	TRUE
Mozambique	NA	NA	SPT54711	NA	South East Africa	East Africa	AFRICA	TRUE	uncallable	uncallable	uncallable	uncallable	ERR6279694	NA	56.5196	TRUE
Mozambique	NA	NA	SPT54712	NA	South East Africa	East Africa	AFRICA	TRUE	uncallable	uncallable	uncallable	uncallable	ERR6279695	NA	41.7618	TRUE
Mozambique	NA	NA	SPT54713	NA	South East Africa	East Africa	AFRICA	TRUE	uncallable	uncallable	uncallable	uncallable	ERR6279696	NA	17.7051	TRUE
Mozambique	NA	NA	SPT54715	NA	South East Africa	East Africa	AFRICA	TRUE	uncallable	uncallable	uncallable	uncallable	ERR6279697	NA	62.3674	TRUE
Mozambique	NA	NA	SPT54717	NA	South East Africa	East Africa	AFRICA	TRUE	uncallable	uncallable	uncallable	uncallable	ERR6279698	NA	67.7794	TRUE
Mozambique	NA	NA	SPT54718	NA	South East Africa	East Africa	AFRICA	TRUE	uncallable	uncallable	uncallable	uncallable	ERR6279699	NA	67.759	TRUE
Mozambique	NA	NA	SPT54719	NA	South East Africa	East Africa	AFRICA	TRUE	uncallable	uncallable	uncallable	uncallable	ERR6279700	NA	59.3731	TRUE
Mozambique	NA	NA	SPT54721	NA	South East Africa	East Africa	AFRICA	TRUE	uncallable	uncallable	uncallable	uncallable	ERR6279701	NA	0.633801	TRUE
Mozambique	NA	NA	SPT54722	NA	South East Africa	East Africa	AFRICA	TRUE	uncallable	uncallable	uncallable	uncallable	ERR6279702	NA	41.9846	TRUE
Mozambique	NA	NA	SPT54723	NA	South East Africa	East Africa	AFRICA	TRUE	uncallable	uncallable	uncallable	uncallable	ERR6279703	NA	28.9391	TRUE
Mozambique	NA	NA	SPT54724	NA	South East Africa	East Africa	AFRICA	TRUE	uncallable	uncallable	uncallable	uncallable	ERR6279704	NA	105.606	TRUE
Mozambique	NA	NA	SPT54725	NA	South East Africa	East Africa	AFRICA	TRUE	uncallable	uncallable	uncallable	uncallable	ERR6279705	NA	44.5225	TRUE
Mozambique	NA	NA	SPT54726	NA	South East Africa	East Africa	AFRICA	TRUE	uncallable	uncallable	uncallable	uncallable	ERR6279706	NA	32.8261	TRUE
Mozambique	NA	NA	SPT54727	NA	South East Africa	East Africa	AFRICA	TRUE	uncallable	uncallable	uncallable	uncallable	ERR6279707	NA	72.208	TRUE
Mozambique	NA	NA	SPT54728	NA	South East Africa	East Africa	AFRICA	TRUE	uncallable	uncallable	uncallable	uncallable	ERR6279708	NA	62.8184	TRUE
Mozambique	NA	NA	SPT54729	NA	South East Africa	East Africa	AFRICA	TRUE	uncallable	uncallable	uncallable	uncallable	ERR6279709	NA	50.4599	TRUE
Mozambique	NA	NA	SPT54730	NA	South East Africa	East Africa	AFRICA	TRUE	uncallable	uncallable	uncallable	uncallable	ERR6279710	NA	90.7837	TRUE
Mozambique	NA	NA	SPT54732	NA	South East Africa	East Africa	AFRICA	TRUE	uncallable	uncallable	uncallable	uncallable	ERR6279711	NA	20.5257	TRUE
Mozambique	NA	NA	SPT54733	NA	South East Africa	East Africa	AFRICA	TRUE	uncallable	uncallable	uncallable	uncallable	ERR6279712	NA	41.9533	TRUE
Mozambique	NA	NA	SPT54735	NA	South East Africa	East Africa	AFRICA	TRUE	uncallable	uncallable	uncallable	uncallable	ERR6279713	NA	79.496	TRUE
Mozambique	NA	NA	SPT54736	NA	South East Africa	East Africa	AFRICA	TRUE	uncallable	uncallable	uncallable	uncallable	ERR6279714	NA	55.7279	TRUE
Mozambique	NA	NA	SPT54737	NA	South East Africa	East Africa	AFRICA	TRUE	uncallable	uncallable	uncallable	uncallable	ERR6279715	NA	63.1903	TRUE
Mozambique	NA	NA	SPT54738	NA	South East Africa	East Africa	AFRICA	TRUE	uncallable	uncallable	uncallable	uncallable	ERR6279716	NA	43.9602	TRUE
Mozambique	NA	NA	SPT54740	NA	South East Africa	East Africa	AFRICA	TRUE	uncallable	uncallable	uncallable	uncallable	ERR6279717	NA	100.752	TRUE
Mozambique	NA	NA	SPT54741	NA	South East Africa	East Africa	AFRICA	TRUE	uncallable	uncallable	uncallable	uncallable	ERR6279718	NA	57.1922	TRUE
Mozambique	NA	NA	SPT54743	NA	South East Africa	East Africa	AFRICA	TRUE	uncallable	uncallable	uncallable	uncallable	ERR6279719	NA	56.4474	TRUE
Mozambique	NA	NA	SPT54744	NA	South East Africa	East Africa	AFRICA	TRUE	uncallable	uncallable	uncallable	uncallable	ERR6279720	NA	64.9161	TRUE
Mozambique	NA	NA	SPT54746	NA	South East Africa	East Africa	AFRICA	TRUE	uncallable	uncallable	uncallable	uncallable	ERR6279721	NA	99.2559	TRUE
Mozambique	NA	NA	SPT54747	NA	South East Africa	East Africa	AFRICA	TRUE	uncallable	uncallable	uncallable	uncallable	ERR6279722	NA	32.1664	TRUE
Mozambique	NA	NA	SPT54749	NA	South East Africa	East Africa	AFRICA	TRUE	uncallable	uncallable	uncallable	uncallable	ERR6279723	NA	38.3565	TRUE
Mozambique	NA	NA	SPT54750	NA	South East Africa	East Africa	AFRICA	TRUE	uncallable	uncallable	uncallable	uncallable	ERR6279724	NA	78.521	TRUE
Mozambique	NA	NA	SPT54752	NA	South East Africa	East Africa	AFRICA	TRUE	uncallable	uncallable	uncallable	uncallable	ERR6279725	NA	34.134	TRUE
Mozambique	NA	NA	SPT54753	NA	South East Africa	East Africa	AFRICA	TRUE	uncallable	uncallable	uncallable	uncallable	ERR6279726	NA	58.6542	TRUE
Mozambique	NA	NA	SPT54754	NA	South East Africa	East Africa	AFRICA	TRUE	uncallable	uncallable	uncallable	uncallable	ERR6279727	NA	92.7834	TRUE
Mozambique	NA	NA	SPT54755	NA	South East Africa	East Africa	AFRICA	TRUE	uncallable	uncallable	uncallable	uncallable	ERR6279728	NA	24.8127	TRUE
Mozambique	NA	NA	SPT54757	NA	South East Africa	East Africa	AFRICA	TRUE	uncallable	uncallable	uncallable	uncallable	ERR6279729	NA	84.6953	TRUE
Mozambique	NA	NA	SPT54759	NA	South East Africa	East Africa	AFRICA	TRUE	uncallable	uncallable	uncallable	uncallable	ERR6279730	NA	81.4094	TRUE
Mozambique	NA	NA	SPT54762	NA	South East Africa	East Africa	AFRICA	TRUE	uncallable	uncallable	uncallable	uncallable	ERR6279731	NA	32.6628	TRUE
Mozambique	NA	NA	SPT54763	NA	South East Africa	East Africa	AFRICA	TRUE	uncallable	uncallable	uncallable	uncallable	ERR6279732	NA	55.4397	TRUE
Mozambique	NA	NA	SPT54764	NA	South East Africa	East Africa	AFRICA	TRUE	uncallable	uncallable	uncallable	uncallable	ERR6279733	NA	83.5007	TRUE
Mozambique	NA	NA	SPT54560	NA	South East Africa	East Africa	AFRICA	TRUE	uncallable	uncallable	uncallable	uncallable	ERR6279734	NA	80.2856	TRUE
Mozambique	NA	NA	SPT54766	NA	South East Africa	East Africa	AFRICA	TRUE	uncallable	uncallable	uncallable	uncallable	ERR6279735	NA	148.035	TRUE
Mozambique	NA	NA	SPT54767	NA	South East Africa	East Africa	AFRICA	TRUE	uncallable	uncallable	uncallable	uncallable	ERR6279736	NA	74.1063	TRUE
Mozambique	NA	NA	SPT54769	NA	South East Africa	East Africa	AFRICA	TRUE	uncallable	uncallable	uncallable	uncallable	ERR6279737	NA	0.888319	TRUE
Mozambique	NA	NA	SPT54770	NA	South East Africa	East Africa	AFRICA	TRUE	uncallable	uncallable	uncallable	uncallable	ERR6279738	NA	89.6929	TRUE
Mozambique	NA	NA	SPT54771	NA	South East Africa	East Africa	AFRICA	TRUE	uncallable	uncallable	uncallable	uncallable	ERR6279739	NA	33.2567	TRUE
Mozambique	NA	NA	SPT54775	NA	South East Africa	East Africa	AFRICA	TRUE	uncallable	uncallable	uncallable	uncallable	ERR6279740	NA	13.8116	TRUE
Mozambique	NA	NA	SPT54776	NA	South East Africa	East Africa	AFRICA	TRUE	uncallable	uncallable	uncallable	uncallable	ERR6279741	NA	51.5683	TRUE
Mozambique	NA	NA	SPT54777	NA	South East Africa	East Africa	AFRICA	TRUE	uncallable	uncallable	uncallable	uncallable	ERR6279742	NA	1.36117	TRUE
Mozambique	NA	NA	SPT54778	NA	South East Africa	East Africa	AFRICA	TRUE	uncallable	uncallable	uncallable	uncallable	ERR6279743	NA	13.3092	TRUE
Mozambique	NA	NA	SPT54779	NA	South East Africa	East Africa	AFRICA	TRUE	uncallable	uncallable	uncallable	uncallable	ERR6279744	NA	5.89134	TRUE
Mozambique	NA	NA	SPT54780	NA	South East Africa	East Africa	AFRICA	TRUE	uncallable	uncallable	uncallable	uncallable	ERR6279745	NA	4.625	TRUE
Mozambique	NA	NA	SPT54782	NA	South East Africa	East Africa	AFRICA	TRUE	uncallable	uncallable	uncallable	uncallable	ERR6279746	NA	66.8512	TRUE
Mozambique	NA	NA	SPT54784	NA	South East Africa	East Africa	AFRICA	TRUE	uncallable	uncallable	uncallable	uncallable	ERR6279747	NA	19.1802	TRUE
Mozambique	NA	NA	SPT54785	NA	South East Africa	East Africa	AFRICA	TRUE	uncallable	uncallable	uncallable	uncallable	ERR6279748	NA	67.7236	TRUE
Mozambique	NA	NA	SPT54786	NA	South East Africa	East Africa	AFRICA	TRUE	uncallable	uncallable	uncallable	uncallable	ERR6279749	NA	2.21875	TRUE
Mozambique	NA	NA	SPT54788	NA	South East Africa	East Africa	AFRICA	TRUE	uncallable	uncallable	uncallable	uncallable	ERR6279750	NA	1.27481	TRUE
Mozambique	NA	NA	SPT54793	NA	South East Africa	East Africa	AFRICA	TRUE	uncallable	uncallable	uncallable	uncallable	ERR6279751	NA	85.0639	TRUE
Mozambique	NA	NA	SPT54794	NA	South East Africa	East Africa	AFRICA	TRUE	uncallable	uncallable	uncallable	uncallable	ERR6279752	NA	5.02506	TRUE
Mozambique	NA	NA	SPT54795	NA	South East Africa	East Africa	AFRICA	TRUE	uncallable	uncallable	uncallable	uncallable	ERR6279753	NA	26.3913	TRUE
Mozambique	NA	NA	SPT54796	NA	South East Africa	East Africa	AFRICA	TRUE	uncallable	uncallable	uncallable	uncallable	ERR6279754	NA	9.70116	TRUE
Mozambique	NA	NA	SPT54797	NA	South East Africa	East Africa	AFRICA	TRUE	uncallable	uncallable	uncallable	uncallable	ERR6279755	NA	26.5174	TRUE
Mozambique	NA	NA	SPT54801	NA	South East Africa	East Africa	AFRICA	TRUE	uncallable	uncallable	uncallable	uncallable	ERR6279756	NA	8.60509	TRUE
Mozambique	NA	NA	SPT54804	NA	South East Africa	East Africa	AFRICA	TRUE	uncallable	uncallable	uncallable	uncallable	ERR6279757	NA	35.4779	TRUE
Mozambique	NA	NA	SPT54808	NA	South East Africa	East Africa	AFRICA	TRUE	uncallable	uncallable	uncallable	uncallable	ERR6279758	NA	0.00499742	TRUE
Mozambique	NA	NA	SPT54860	NA	South East Africa	East Africa	AFRICA	TRUE	uncallable	uncallable	uncallable	uncallable	ERR6279759	NA	17.6793	TRUE
Mozambique	NA	NA	SPT54861	NA	South East Africa	East Africa	AFRICA	TRUE	uncallable	uncallable	uncallable	uncallable	ERR6279760	NA	13.105	TRUE
Mozambique	NA	NA	SPT54863	NA	South East Africa	East Africa	AFRICA	TRUE	uncallable	uncallable	uncallable	uncallable	ERR6279761	NA	119.698	TRUE
Mozambique	NA	NA	SPT54865	NA	South East Africa	East Africa	AFRICA	TRUE	uncallable	uncallable	uncallable	uncallable	ERR6279762	NA	2.77288	TRUE
Mozambique	NA	NA	SPT54872	NA	South East Africa	East Africa	AFRICA	TRUE	uncallable	uncallable	uncallable	uncallable	ERR6279763	NA	1002.84	TRUE
Mozambique	NA	NA	SPT54873	NA	South East Africa	East Africa	AFRICA	TRUE	uncallable	uncallable	uncallable	uncallable	ERR6279764	NA	20.1699	TRUE
Mozambique	NA	NA	SPT54874	NA	South East Africa	East Africa	AFRICA	TRUE	uncallable	uncallable	uncallable	uncallable	ERR6279765	NA	13.6958	TRUE
Mozambique	NA	NA	SPT54877	NA	South East Africa	East Africa	AFRICA	TRUE	uncallable	uncallable	uncallable	uncallable	ERR6279766	NA	15.695	TRUE
Mozambique	NA	NA	SPT54879	NA	South East Africa	East Africa	AFRICA	TRUE	uncallable	uncallable	uncallable	uncallable	ERR6279767	NA	1.88995	TRUE
Mozambique	NA	NA	SPT54882	NA	South East Africa	East Africa	AFRICA	TRUE	uncallable	uncallable	uncallable	uncallable	ERR6279768	NA	101.16	TRUE
Mozambique	NA	NA	SPT54888	NA	South East Africa	East Africa	AFRICA	TRUE	uncallable	uncallable	uncallable	uncallable	ERR6279769	NA	11.0236	TRUE
Mozambique	NA	NA	SPT54895	NA	South East Africa	East Africa	AFRICA	TRUE	uncallable	uncallable	uncallable	uncallable	ERR6279770	NA	1.89782	TRUE
Mozambique	NA	NA	SPT54897	NA	South East Africa	East Africa	AFRICA	TRUE	uncallable	uncallable	uncallable	uncallable	ERR6279771	NA	0.544858	TRUE
Mozambique	NA	NA	SPT54898	NA	South East Africa	East Africa	AFRICA	TRUE	uncallable	uncallable	uncallable	uncallable	ERR6279772	NA	4.79539	TRUE
Mozambique	NA	NA	SPT54919	NA	South East Africa	East Africa	AFRICA	TRUE	uncallable	uncallable	uncallable	uncallable	ERR6279773	NA	253.523	TRUE
Mozambique	NA	NA	SPT54920	NA	South East Africa	East Africa	AFRICA	TRUE	uncallable	uncallable	uncallable	uncallable	ERR6279774	NA	156.749	TRUE
Mozambique	NA	NA	SPT54929	NA	South East Africa	East Africa	AFRICA	TRUE	uncallable	uncallable	uncallable	uncallable	ERR6279775	NA	14.0489	TRUE
Mozambique	NA	NA	SPT54930	NA	South East Africa	East Africa	AFRICA	TRUE	uncallable	uncallable	uncallable	uncallable	ERR6279776	NA	11.1545	TRUE
Mozambique	NA	NA	SPT54939	NA	South East Africa	East Africa	AFRICA	TRUE	uncallable	uncallable	uncallable	uncallable	ERR6279777	NA	3.88265	TRUE
Mozambique	NA	NA	SPT54943	NA	South East Africa	East Africa	AFRICA	TRUE	uncallable	uncallable	uncallable	uncallable	ERR6279778	NA	83.1795	TRUE
Mozambique	NA	NA	SPT54954	NA	South East Africa	East Africa	AFRICA	TRUE	uncallable	uncallable	uncallable	uncallable	ERR6279779	NA	38.7161	TRUE
Mozambique	NA	NA	SPT54955	NA	South East Africa	East Africa	AFRICA	TRUE	uncallable	uncallable	uncallable	uncallable	ERR6279780	NA	63.593	TRUE
Mozambique	NA	NA	SPT54959	NA	South East Africa	East Africa	AFRICA	TRUE	uncallable	uncallable	uncallable	uncallable	ERR6279781	NA	15.5615	TRUE
Mozambique	NA	NA	SPT54961	NA	South East Africa	East Africa	AFRICA	TRUE	uncallable	uncallable	uncallable	uncallable	ERR6279782	NA	7.91916	TRUE
Mozambique	NA	NA	SPT54971	NA	South East Africa	East Africa	AFRICA	TRUE	uncallable	uncallable	uncallable	uncallable	ERR6279783	NA	5.11677	TRUE
Mozambique	NA	NA	SPT54809	NA	South East Africa	East Africa	AFRICA	TRUE	uncallable	uncallable	uncallable	uncallable	ERR6279784	NA	89.1639	TRUE
Mozambique	NA	NA	SPT54810	NA	South East Africa	East Africa	AFRICA	TRUE	uncallable	uncallable	uncallable	uncallable	ERR6279785	NA	1.2569	TRUE
Mozambique	NA	NA	SPT54811	NA	South East Africa	East Africa	AFRICA	TRUE	uncallable	uncallable	uncallable	uncallable	ERR6279786	NA	24.5611	TRUE
Mozambique	NA	NA	SPT54812	NA	South East Africa	East Africa	AFRICA	TRUE	uncallable	uncallable	uncallable	uncallable	ERR6279787	NA	63.4101	TRUE
Mozambique	NA	NA	SPT54817	NA	South East Africa	East Africa	AFRICA	TRUE	uncallable	uncallable	uncallable	uncallable	ERR6279788	NA	103.316	TRUE
Mozambique	NA	NA	SPT54818	NA	South East Africa	East Africa	AFRICA	TRUE	uncallable	uncallable	uncallable	uncallable	ERR6279789	NA	1.37183	TRUE
Mozambique	NA	NA	SPT54819	NA	South East Africa	East Africa	AFRICA	TRUE	uncallable	uncallable	uncallable	uncallable	ERR6279790	NA	109.527	TRUE
Mozambique	NA	NA	SPT54822	NA	South East Africa	East Africa	AFRICA	TRUE	uncallable	uncallable	uncallable	uncallable	ERR6279791	NA	12.2222	TRUE
Mozambique	NA	NA	SPT54823	NA	South East Africa	East Africa	AFRICA	TRUE	uncallable	uncallable	uncallable	uncallable	ERR6279792	NA	1.87852	TRUE
Mozambique	NA	NA	SPT54825	NA	South East Africa	East Africa	AFRICA	TRUE	uncallable	uncallable	uncallable	uncallable	ERR6279793	NA	88.1618	TRUE
Mozambique	NA	NA	SPT54826	NA	South East Africa	East Africa	AFRICA	TRUE	uncallable	uncallable	uncallable	uncallable	ERR6279794	NA	17.6446	TRUE
Mozambique	NA	NA	SPT54827	NA	South East Africa	East Africa	AFRICA	TRUE	uncallable	uncallable	uncallable	uncallable	ERR6279795	NA	89.8335	TRUE
Mozambique	NA	NA	SPT54832	NA	South East Africa	East Africa	AFRICA	TRUE	uncallable	uncallable	uncallable	uncallable	ERR6279796	NA	34.8716	TRUE
Mozambique	NA	NA	SPT54833	NA	South East Africa	East Africa	AFRICA	TRUE	uncallable	uncallable	uncallable	uncallable	ERR6279797	NA	91.2784	TRUE
Mozambique	NA	NA	SPT54834	NA	South East Africa	East Africa	AFRICA	TRUE	uncallable	uncallable	uncallable	uncallable	ERR6279798	NA	51.4456	TRUE
Mozambique	NA	NA	SPT54836	NA	South East Africa	East Africa	AFRICA	TRUE	uncallable	uncallable	uncallable	uncallable	ERR6279799	NA	1.83294	TRUE
Mozambique	NA	NA	SPT54837	NA	South East Africa	East Africa	AFRICA	TRUE	uncallable	uncallable	uncallable	uncallable	ERR6279800	NA	2.57007	TRUE
Mozambique	NA	NA	SPT54840	NA	South East Africa	East Africa	AFRICA	TRUE	uncallable	uncallable	uncallable	uncallable	ERR6279801	NA	39.4635	TRUE
Mozambique	NA	NA	SPT54845	NA	South East Africa	East Africa	AFRICA	TRUE	uncallable	uncallable	uncallable	uncallable	ERR6279802	NA	128.127	TRUE
Mozambique	NA	NA	SPT54848	NA	South East Africa	East Africa	AFRICA	TRUE	uncallable	uncallable	uncallable	uncallable	ERR6279803	NA	68.6879	TRUE
Mozambique	NA	NA	SPT54852	NA	South East Africa	East Africa	AFRICA	TRUE	uncallable	uncallable	uncallable	uncallable	ERR6279804	NA	4.24128	TRUE
Mozambique	NA	NA	SPT54855	NA	South East Africa	East Africa	AFRICA	TRUE	uncallable	uncallable	uncallable	uncallable	ERR6279805	NA	73.4209	TRUE
Mozambique	NA	NA	SPT54856	NA	South East Africa	East Africa	AFRICA	TRUE	uncallable	uncallable	uncallable	uncallable	ERR6279806	NA	83.0571	TRUE
Mozambique	NA	NA	SPT54857	NA	South East Africa	East Africa	AFRICA	TRUE	uncallable	uncallable	uncallable	uncallable	ERR6279807	NA	42.5908	TRUE
Mozambique	NA	NA	SPT54858	NA	South East Africa	East Africa	AFRICA	TRUE	uncallable	uncallable	uncallable	uncallable	ERR6279808	NA	56.0925	TRUE
Mozambique	NA	NA	SPT54981	NA	South East Africa	East Africa	AFRICA	TRUE	uncallable	uncallable	uncallable	uncallable	ERR6279809	NA	9.87953	TRUE
Mozambique	NA	NA	SPT54991	NA	South East Africa	East Africa	AFRICA	TRUE	uncallable	uncallable	uncallable	uncallable	ERR6279810	NA	14.9291	TRUE
Mozambique	NA	NA	SPT55064	NA	South East Africa	East Africa	AFRICA	TRUE	uncallable	uncallable	uncallable	uncallable	ERR6279811	NA	4.6301	TRUE
Mozambique	NA	NA	SPT55093	NA	South East Africa	East Africa	AFRICA	TRUE	uncallable	uncallable	uncallable	uncallable	ERR6279812	NA	1.92835	TRUE
Mozambique	NA	NA	SPT55111	NA	South East Africa	East Africa	AFRICA	TRUE	uncallable	uncallable	uncallable	uncallable	ERR6279813	NA	0.556018	TRUE
Mozambique	NA	NA	SPT55112	NA	South East Africa	East Africa	AFRICA	TRUE	uncallable	uncallable	uncallable	uncallable	ERR6279814	NA	0.446719	TRUE
Mozambique	NA	NA	SPT55113	NA	South East Africa	East Africa	AFRICA	TRUE	uncallable	uncallable	uncallable	uncallable	ERR6279815	NA	65.4372	TRUE
Mozambique	NA	NA	SPT55125	NA	South East Africa	East Africa	AFRICA	TRUE	uncallable	uncallable	uncallable	uncallable	ERR6279816	NA	179.79	TRUE
Mozambique	NA	NA	SPT55147	NA	South East Africa	East Africa	AFRICA	TRUE	uncallable	uncallable	uncallable	uncallable	ERR6279817	NA	58.2867	TRUE
Mozambique	NA	NA	SPT55178	NA	South East Africa	East Africa	AFRICA	TRUE	uncallable	uncallable	uncallable	uncallable	ERR6279818	NA	0.0618271	TRUE
Mozambique	NA	NA	SPT55233	NA	South East Africa	East Africa	AFRICA	TRUE	uncallable	uncallable	uncallable	uncallable	ERR6279819	NA	18.3433	TRUE
Mozambique	NA	NA	SPT55255	NA	South East Africa	East Africa	AFRICA	TRUE	uncallable	uncallable	uncallable	uncallable	ERR6279820	NA	0.0039751	TRUE
Mozambique	NA	NA	SPT55256	NA	South East Africa	East Africa	AFRICA	TRUE	uncallable	uncallable	uncallable	uncallable	ERR6279821	NA	0.735823	TRUE
Mozambique	NA	NA	SPT55328	NA	South East Africa	East Africa	AFRICA	TRUE	uncallable	uncallable	uncallable	uncallable	ERR6279822	NA	10.2655	TRUE
Mozambique	NA	NA	SPT55389	NA	South East Africa	East Africa	AFRICA	TRUE	uncallable	uncallable	uncallable	uncallable	ERR6279823	NA	7.79762	TRUE
Mozambique	NA	NA	SPT55419	NA	South East Africa	East Africa	AFRICA	TRUE	uncallable	uncallable	uncallable	uncallable	ERR6279824	NA	13.2338	TRUE
Mozambique	NA	NA	SPT55421	NA	South East Africa	East Africa	AFRICA	TRUE	uncallable	uncallable	uncallable	uncallable	ERR6279825	NA	55.8308	TRUE
Mozambique	NA	NA	SPT55424	NA	South East Africa	East Africa	AFRICA	TRUE	uncallable	uncallable	uncallable	uncallable	ERR6279826	NA	72.1124	TRUE
Mozambique	NA	NA	SPT55429	NA	South East Africa	East Africa	AFRICA	TRUE	uncallable	uncallable	uncallable	uncallable	ERR6279827	NA	14.8963	TRUE
Mozambique	NA	NA	SPT55431	NA	South East Africa	East Africa	AFRICA	TRUE	uncallable	uncallable	uncallable	uncallable	ERR6279828	NA	36.7052	TRUE
Mozambique	NA	NA	SPT55434	NA	South East Africa	East Africa	AFRICA	TRUE	uncallable	uncallable	uncallable	uncallable	ERR6279829	NA	10.4265	TRUE
Mozambique	NA	NA	SPT55435	NA	South East Africa	East Africa	AFRICA	TRUE	uncallable	uncallable	uncallable	uncallable	ERR6279830	NA	1.03239	TRUE
Mozambique	NA	NA	SPT55436	NA	South East Africa	East Africa	AFRICA	TRUE	uncallable	uncallable	uncallable	uncallable	ERR6279831	NA	17.2862	TRUE
Mozambique	NA	NA	SPT55438	NA	South East Africa	East Africa	AFRICA	TRUE	uncallable	uncallable	uncallable	uncallable	ERR6279832	NA	5.5297	TRUE
Mozambique	NA	NA	SPT55440	NA	South East Africa	East Africa	AFRICA	TRUE	uncallable	uncallable	uncallable	uncallable	ERR6279833	NA	19.2048	TRUE
Mozambique	NA	NA	SPT54666	NA	South East Africa	East Africa	AFRICA	TRUE	uncallable	uncallable	uncallable	uncallable	ERR6279835	NA	78.2562	TRUE
Mozambique	NA	NA	SPT54667	NA	South East Africa	East Africa	AFRICA	TRUE	uncallable	uncallable	uncallable	uncallable	ERR6279836	NA	62.6033	TRUE
Mozambique	NA	NA	SPT54668	NA	South East Africa	East Africa	AFRICA	TRUE	uncallable	uncallable	uncallable	uncallable	ERR6279837	NA	77.7523	TRUE
Mozambique	NA	NA	SPT54669	NA	South East Africa	East Africa	AFRICA	TRUE	uncallable	uncallable	uncallable	uncallable	ERR6279838	NA	51.8598	TRUE
Mozambique	NA	NA	SPT54672	NA	South East Africa	East Africa	AFRICA	TRUE	uncallable	uncallable	uncallable	uncallable	ERR6279839	NA	45.197	TRUE
Mozambique	NA	NA	SPT54673	NA	South East Africa	East Africa	AFRICA	TRUE	uncallable	uncallable	uncallable	uncallable	ERR6279840	NA	25.3301	TRUE
Mozambique	NA	NA	SPT54674	NA	South East Africa	East Africa	AFRICA	TRUE	uncallable	uncallable	uncallable	uncallable	ERR6279841	NA	74.7966	TRUE
Mozambique	NA	NA	SPT54675	NA	South East Africa	East Africa	AFRICA	TRUE	uncallable	uncallable	uncallable	uncallable	ERR6279842	NA	29.6409	TRUE
Mozambique	NA	NA	SPT54676	NA	South East Africa	East Africa	AFRICA	TRUE	uncallable	uncallable	uncallable	uncallable	ERR6279843	NA	66.6968	TRUE
Mozambique	NA	NA	SPT54678	NA	South East Africa	East Africa	AFRICA	TRUE	uncallable	uncallable	uncallable	uncallable	ERR6279844	NA	0.466812	TRUE
Mozambique	NA	NA	SPT54679	NA	South East Africa	East Africa	AFRICA	TRUE	uncallable	uncallable	uncallable	uncallable	ERR6279845	NA	45.2715	TRUE
Mozambique	NA	NA	SPT54681	NA	South East Africa	East Africa	AFRICA	TRUE	uncallable	uncallable	uncallable	uncallable	ERR6279846	NA	56.9671	TRUE
Mozambique	NA	NA	SPT54682	NA	South East Africa	East Africa	AFRICA	TRUE	uncallable	uncallable	uncallable	uncallable	ERR6279847	NA	51.5895	TRUE
Mozambique	NA	NA	SPT54683	NA	South East Africa	East Africa	AFRICA	TRUE	uncallable	uncallable	uncallable	uncallable	ERR6279848	NA	79.8911	TRUE
Mozambique	NA	NA	SPT54684	NA	South East Africa	East Africa	AFRICA	TRUE	uncallable	uncallable	uncallable	uncallable	ERR6279849	NA	82.7659	TRUE
Mozambique	NA	NA	SPT54685	NA	South East Africa	East Africa	AFRICA	TRUE	uncallable	uncallable	uncallable	uncallable	ERR6279850	NA	96.7183	TRUE
Mozambique	NA	NA	SPT54687	NA	South East Africa	East Africa	AFRICA	TRUE	uncallable	uncallable	uncallable	uncallable	ERR6279851	NA	47.9198	TRUE
Mozambique	NA	NA	SPT54689	NA	South East Africa	East Africa	AFRICA	TRUE	uncallable	uncallable	uncallable	uncallable	ERR6279852	NA	62.4553	TRUE
Mozambique	NA	NA	SPT54690	NA	South East Africa	East Africa	AFRICA	TRUE	uncallable	uncallable	uncallable	uncallable	ERR6279853	NA	49.131	TRUE
Mozambique	NA	NA	SPT54692	NA	South East Africa	East Africa	AFRICA	TRUE	uncallable	uncallable	uncallable	uncallable	ERR6279854	NA	79.4947	TRUE
Mozambique	NA	NA	SPT54693	NA	South East Africa	East Africa	AFRICA	TRUE	uncallable	uncallable	uncallable	uncallable	ERR6279855	NA	36.9494	TRUE
Mozambique	NA	NA	SPT54695	NA	South East Africa	East Africa	AFRICA	TRUE	uncallable	uncallable	uncallable	uncallable	ERR6279856	NA	67.7319	TRUE
Mozambique	NA	NA	SPT54696	NA	South East Africa	East Africa	AFRICA	TRUE	uncallable	uncallable	uncallable	uncallable	ERR6279857	NA	75.7689	TRUE
Mozambique	NA	NA	SPT54697	NA	South East Africa	East Africa	AFRICA	TRUE	uncallable	uncallable	uncallable	uncallable	ERR6279858	NA	30.9159	TRUE
Mozambique	NA	NA	SPT54698	NA	South East Africa	East Africa	AFRICA	TRUE	uncallable	uncallable	uncallable	uncallable	ERR6279859	NA	72.3379	TRUE
Mozambique	NA	NA	SPT55500	NA	South East Africa	East Africa	AFRICA	TRUE	uncallable	uncallable	uncallable	uncallable	ERR6279860	NA	31.2305	TRUE
Mozambique	NA	NA	SPT55501	NA	South East Africa	East Africa	AFRICA	TRUE	uncallable	uncallable	uncallable	uncallable	ERR6279861	NA	8.06518	TRUE
Mozambique	NA	NA	SPT55502	NA	South East Africa	East Africa	AFRICA	TRUE	uncallable	uncallable	uncallable	uncallable	ERR6279862	NA	49.8644	TRUE
Mozambique	NA	NA	SPT55503	NA	South East Africa	East Africa	AFRICA	TRUE	uncallable	uncallable	uncallable	uncallable	ERR6279863	NA	9.63708	TRUE
Mozambique	NA	NA	SPT55504	NA	South East Africa	East Africa	AFRICA	TRUE	uncallable	uncallable	uncallable	uncallable	ERR6279864	NA	45.3746	TRUE
Mozambique	NA	NA	SPT55505	NA	South East Africa	East Africa	AFRICA	TRUE	uncallable	uncallable	uncallable	uncallable	ERR6279865	NA	5.29685	TRUE
Mozambique	NA	NA	SPT55506	NA	South East Africa	East Africa	AFRICA	TRUE	uncallable	uncallable	uncallable	uncallable	ERR6279866	NA	88.4964	TRUE
Mozambique	NA	NA	SPT55508	NA	South East Africa	East Africa	AFRICA	TRUE	uncallable	uncallable	uncallable	uncallable	ERR6279867	NA	63.4227	TRUE
Mozambique	NA	NA	SPT55516	NA	South East Africa	East Africa	AFRICA	TRUE	uncallable	uncallable	uncallable	uncallable	ERR6279868	NA	30.4582	TRUE
Mozambique	NA	NA	SPT55525	NA	South East Africa	East Africa	AFRICA	TRUE	uncallable	uncallable	uncallable	uncallable	ERR6279869	NA	9.42733	TRUE
Mozambique	NA	NA	SPT55530	NA	South East Africa	East Africa	AFRICA	TRUE	uncallable	uncallable	uncallable	uncallable	ERR6279870	NA	8.01856	TRUE
Mozambique	NA	NA	SPT55531	NA	South East Africa	East Africa	AFRICA	TRUE	uncallable	uncallable	uncallable	uncallable	ERR6279871	NA	0.209712	TRUE
Mozambique	NA	NA	SPT55532	NA	South East Africa	East Africa	AFRICA	TRUE	uncallable	uncallable	uncallable	uncallable	ERR6279872	NA	18.1008	TRUE
Mozambique	NA	NA	SPT55539	NA	South East Africa	East Africa	AFRICA	TRUE	uncallable	uncallable	uncallable	uncallable	ERR6279873	NA	3.10228	TRUE
Mozambique	NA	NA	SPT55545	NA	South East Africa	East Africa	AFRICA	TRUE	uncallable	uncallable	uncallable	uncallable	ERR6279874	NA	42.3823	TRUE
Mozambique	NA	NA	SPT55558	NA	South East Africa	East Africa	AFRICA	TRUE	uncallable	uncallable	uncallable	uncallable	ERR6279875	NA	33.1891	TRUE
Mozambique	NA	NA	SPT55564	NA	South East Africa	East Africa	AFRICA	TRUE	uncallable	uncallable	uncallable	uncallable	ERR6279876	NA	20.1412	TRUE
Mozambique	NA	NA	SPT55567	NA	South East Africa	East Africa	AFRICA	TRUE	uncallable	uncallable	uncallable	uncallable	ERR6279877	NA	4.35009	TRUE
Mozambique	NA	NA	SPT55576	NA	South East Africa	East Africa	AFRICA	TRUE	uncallable	uncallable	uncallable	uncallable	ERR6279878	NA	56.8693	TRUE
Mozambique	NA	NA	SPT55583	NA	South East Africa	East Africa	AFRICA	TRUE	uncallable	uncallable	uncallable	uncallable	ERR6279879	NA	4.27937	TRUE
Mozambique	NA	NA	SPT55584	NA	South East Africa	East Africa	AFRICA	TRUE	uncallable	uncallable	uncallable	uncallable	ERR6279880	NA	10.1574	TRUE
Mozambique	NA	NA	SPT55595	NA	South East Africa	East Africa	AFRICA	TRUE	uncallable	uncallable	uncallable	uncallable	ERR6279881	NA	13.0366	TRUE
Mozambique	NA	NA	SPT55617	NA	South East Africa	East Africa	AFRICA	TRUE	uncallable	uncallable	uncallable	uncallable	ERR6279882	NA	0.394928	TRUE
Mozambique	NA	NA	SPT55647	NA	South East Africa	East Africa	AFRICA	TRUE	uncallable	uncallable	uncallable	uncallable	ERR6279883	NA	5.50315	TRUE
Mozambique	NA	NA	SPT55649	NA	South East Africa	East Africa	AFRICA	TRUE	uncallable	uncallable	uncallable	uncallable	ERR6279884	NA	11.5346	TRUE
Mozambique	NA	NA	SPT55443	NA	South East Africa	East Africa	AFRICA	TRUE	uncallable	uncallable	uncallable	uncallable	ERR6279885	NA	7.62267	TRUE
Mozambique	NA	NA	SPT55445	NA	South East Africa	East Africa	AFRICA	TRUE	uncallable	uncallable	uncallable	uncallable	ERR6279886	NA	14.1003	TRUE
Mozambique	NA	NA	SPT55446	NA	South East Africa	East Africa	AFRICA	TRUE	uncallable	uncallable	uncallable	uncallable	ERR6279887	NA	25.7316	TRUE
Mozambique	NA	NA	SPT55447	NA	South East Africa	East Africa	AFRICA	TRUE	uncallable	uncallable	uncallable	uncallable	ERR6279888	NA	5.46815	TRUE
Mozambique	NA	NA	SPT55451	NA	South East Africa	East Africa	AFRICA	TRUE	uncallable	uncallable	uncallable	uncallable	ERR6279889	NA	36.0787	TRUE
Mozambique	NA	NA	SPT55452	NA	South East Africa	East Africa	AFRICA	TRUE	uncallable	uncallable	uncallable	uncallable	ERR6279890	NA	0.471485	TRUE
Mozambique	NA	NA	SPT55453	NA	South East Africa	East Africa	AFRICA	TRUE	uncallable	uncallable	uncallable	uncallable	ERR6279891	NA	13.136	TRUE
Mozambique	NA	NA	SPT55454	NA	South East Africa	East Africa	AFRICA	TRUE	uncallable	uncallable	uncallable	uncallable	ERR6279892	NA	7.89612	TRUE
Mozambique	NA	NA	SPT55455	NA	South East Africa	East Africa	AFRICA	TRUE	uncallable	uncallable	uncallable	uncallable	ERR6279893	NA	2.02707	TRUE
Mozambique	NA	NA	SPT55463	NA	South East Africa	East Africa	AFRICA	TRUE	uncallable	uncallable	uncallable	uncallable	ERR6279894	NA	3.56345	TRUE
Mozambique	NA	NA	SPT55468	NA	South East Africa	East Africa	AFRICA	TRUE	uncallable	uncallable	uncallable	uncallable	ERR6279895	NA	4.49232	TRUE
Mozambique	NA	NA	SPT55469	NA	South East Africa	East Africa	AFRICA	TRUE	uncallable	uncallable	uncallable	uncallable	ERR6279896	NA	21.7238	TRUE
Mozambique	NA	NA	SPT55470	NA	South East Africa	East Africa	AFRICA	TRUE	uncallable	uncallable	uncallable	uncallable	ERR6279897	NA	0.980914	TRUE
Mozambique	NA	NA	SPT55472	NA	South East Africa	East Africa	AFRICA	TRUE	uncallable	uncallable	uncallable	uncallable	ERR6279898	NA	332.747	TRUE
Mozambique	NA	NA	SPT55477	NA	South East Africa	East Africa	AFRICA	TRUE	uncallable	uncallable	uncallable	uncallable	ERR6279899	NA	17.0438	TRUE
Mozambique	NA	NA	SPT55484	NA	South East Africa	East Africa	AFRICA	TRUE	uncallable	uncallable	uncallable	uncallable	ERR6279900	NA	46.5856	TRUE
Mozambique	NA	NA	SPT55489	NA	South East Africa	East Africa	AFRICA	TRUE	uncallable	uncallable	uncallable	uncallable	ERR6279901	NA	9.65631	TRUE
Mozambique	NA	NA	SPT55490	NA	South East Africa	East Africa	AFRICA	TRUE	uncallable	uncallable	uncallable	uncallable	ERR6279902	NA	2.51309	TRUE
Mozambique	NA	NA	SPT55491	NA	South East Africa	East Africa	AFRICA	TRUE	uncallable	uncallable	uncallable	uncallable	ERR6279903	NA	0.577106	TRUE
Mozambique	NA	NA	SPT55492	NA	South East Africa	East Africa	AFRICA	TRUE	uncallable	uncallable	uncallable	uncallable	ERR6279904	NA	1.59677	TRUE
Mozambique	NA	NA	SPT55494	NA	South East Africa	East Africa	AFRICA	TRUE	uncallable	uncallable	uncallable	uncallable	ERR6279905	NA	2.61978	TRUE
Mozambique	NA	NA	SPT55495	NA	South East Africa	East Africa	AFRICA	TRUE	uncallable	uncallable	uncallable	uncallable	ERR6279906	NA	10.5	TRUE
Mozambique	NA	NA	SPT55496	NA	South East Africa	East Africa	AFRICA	TRUE	uncallable	uncallable	uncallable	uncallable	ERR6279907	NA	6.73277	TRUE
Mozambique	NA	NA	SPT55497	NA	South East Africa	East Africa	AFRICA	TRUE	uncallable	uncallable	uncallable	uncallable	ERR6279908	NA	56.6297	TRUE
Mozambique	NA	NA	SPT55498	NA	South East Africa	East Africa	AFRICA	TRUE	uncallable	uncallable	uncallable	uncallable	ERR6279909	NA	49.0522	TRUE
Philippines	LabIsolate	NA	FCH-4	NA	Philippines	Oceania-SEA	OCEANIA	FALSE	present	present	present	pfhrp2+/pfhrp3+	SRR629068,SRR629077	NA	109.931	FALSE
Mauritania	Kobeni	2014	FP0008-C	NA	West Africa	West Africa	AFRICA	TRUE	present	present	present	pfhrp2+/pfhrp3+	ERR1081237	NA	43.808	FALSE
Mauritania	Kobeni	2014	FP0009-C	NA	West Africa	West Africa	AFRICA	TRUE	present	present	present	pfhrp2+/pfhrp3+	ERR1081238	NA	156.461	FALSE
Mauritania	Hodh el Gharbi	2014	FP0010-CW	NA	West Africa	West Africa	AFRICA	TRUE	present	present	present	pfhrp2+/pfhrp3+	ERR2889621	NA	109.433	FALSE
Mauritania	Hodh el Gharbi	2014	FP0011-CW	NA	West Africa	West Africa	AFRICA	TRUE	present	present	present	pfhrp2+/pfhrp3+	ERR2889624	NA	80.4693	FALSE
Mauritania	Hodh el Gharbi	2014	FP0012-CW	NA	West Africa	West Africa	AFRICA	TRUE	present	present	present	pfhrp2+/pfhrp3+	ERR2889627	NA	133.213	FALSE
Mauritania	Hodh el Gharbi	2014	FP0013-CW	NA	West Africa	West Africa	AFRICA	TRUE	present	present	present	pfhrp2+/pfhrp3+	ERR2889629	NA	120.108	FALSE
Mauritania	Hodh el Gharbi	2014	FP0014-CW	NA	West Africa	West Africa	AFRICA	TRUE	present	present	present	pfhrp2+/pfhrp3+	ERR2889631	NA	118.823	FALSE
Mauritania	Kobeni	2014	FP0015-C	NA	West Africa	West Africa	AFRICA	TRUE	present	present	present	pfhrp2+/pfhrp3+	ERR1081239	NA	163.176	FALSE
Mauritania	Kobeni	2014	FP0016-C	NA	West Africa	West Africa	AFRICA	TRUE	present	present	present	pfhrp2+/pfhrp3+	ERR1081240	NA	11.2948	FALSE
Mauritania	Kobeni	2014	FP0017-C	NA	West Africa	West Africa	AFRICA	TRUE	present	present	present	pfhrp2+/pfhrp3+	ERR1081241	NA	171.797	FALSE
Mauritania	Kobeni	2014	FP0018-C	NA	West Africa	West Africa	AFRICA	TRUE	present	present	present	pfhrp2+/pfhrp3+	ERR1081242	NA	198.352	FALSE
Mauritania	Hodh el Gharbi	2014	FP0019-CW	NA	West Africa	West Africa	AFRICA	TRUE	present	present	present	pfhrp2+/pfhrp3+	ERR2889633	NA	94.3972	FALSE
Mauritania	Kobeni	2014	FP0020-C	NA	West Africa	West Africa	AFRICA	TRUE	present	present	present	pfhrp2+/pfhrp3+	ERR1081243	NA	175.728	FALSE
Mauritania	Kobeni	2014	FP0021-C	NA	West Africa	West Africa	AFRICA	TRUE	present	present	present	pfhrp2+/pfhrp3+	ERR1081244	NA	179.659	FALSE
Mauritania	Kobeni	2014	FP0022-C	NA	West Africa	West Africa	AFRICA	TRUE	present	present	present	pfhrp2+/pfhrp3+	ERR1081245	NA	128.885	FALSE
Mauritania	Kobeni	2014	FP0023-C	NA	West Africa	West Africa	AFRICA	TRUE	present	present	present	pfhrp2+/pfhrp3+	ERR1081246	NA	121.938	FALSE
Mauritania	Kobeni	2014	FP0024-C	NA	West Africa	West Africa	AFRICA	TRUE	present	present	present	pfhrp2+/pfhrp3+	ERR1081247	NA	68.1582	FALSE
Mauritania	Kobeni	2014	FP0025-C	NA	West Africa	West Africa	AFRICA	TRUE	present	present	present	pfhrp2+/pfhrp3+	ERR1081248	NA	169.388	FALSE
Mauritania	Kobeni	2014	FP0026-C	NA	West Africa	West Africa	AFRICA	TRUE	uncallable	uncallable	uncallable	uncallable	ERR1099208	NA	0.917593	TRUE
Mauritania	Kobeni	2014	FP0027-C	NA	West Africa	West Africa	AFRICA	TRUE	uncallable	uncallable	uncallable	uncallable	ERR1099209	NA	1.04123	TRUE
Mauritania	Kobeni	2014	FP0028-C	NA	West Africa	West Africa	AFRICA	TRUE	present	present	present	pfhrp2+/pfhrp3+	ERR1099210	NA	226.061	FALSE
Mauritania	Kobeni	2014	FP0029-C	NA	West Africa	West Africa	AFRICA	TRUE	present	present	present	pfhrp2+/pfhrp3+	ERR1099211	NA	93.298	FALSE
Mauritania	Kobeni	2014	FP0031-C	NA	West Africa	West Africa	AFRICA	TRUE	present	present	present	pfhrp2+/pfhrp3+	ERR1099213	NA	40.3447	FALSE
Mauritania	Kobeni	2014	FP0032-C	NA	West Africa	West Africa	AFRICA	TRUE	present	present	present	pfhrp2+/pfhrp3+	ERR1081249	NA	156.124	FALSE
Mauritania	Kobeni	2014	FP0033-C	NA	West Africa	West Africa	AFRICA	TRUE	present	present	present	pfhrp2+/pfhrp3+	ERR1081250	NA	239.767	FALSE
Mauritania	Kobeni	2014	FP0034-C	NA	West Africa	West Africa	AFRICA	TRUE	present	present	present	pfhrp2+/pfhrp3+	ERR1081251	NA	32.3385	FALSE
Mauritania	Kobeni	2014	FP0035-C	NA	West Africa	West Africa	AFRICA	TRUE	present	present	present	pfhrp2+/pfhrp3+	ERR1081252	NA	202.825	FALSE
Mauritania	Hodh el Gharbi	2014	FP0037-CW	NA	West Africa	West Africa	AFRICA	TRUE	present	present	present	pfhrp2+/pfhrp3+	ERR2889635	NA	146.148	FALSE
Mauritania	Kobeni	2014	FP0038-C	NA	West Africa	West Africa	AFRICA	TRUE	present	present	present	pfhrp2+/pfhrp3+	ERR1081253	NA	196.849	FALSE
Mauritania	Aioun	2014	FP0039-C	NA	West Africa	West Africa	AFRICA	TRUE	present	present	present	pfhrp2+/pfhrp3+	ERR1081254	NA	135.924	FALSE
Mauritania	Aioun	2014	FP0040-C	NA	West Africa	West Africa	AFRICA	TRUE	present	present	present	pfhrp2+/pfhrp3+	ERR1099214	NA	161.86	FALSE
Mauritania	Aioun	2014	FP0041-C	NA	West Africa	West Africa	AFRICA	TRUE	present	present	present	pfhrp2+/pfhrp3+	ERR1081255	NA	160.589	FALSE
Mauritania	Aioun	2014	FP0042-C	NA	West Africa	West Africa	AFRICA	TRUE	present	present	present	pfhrp2+/pfhrp3+	ERR1081256	NA	34.6009	FALSE
Mauritania	Aioun	2014	FP0043-C	NA	West Africa	West Africa	AFRICA	TRUE	present	present	present	pfhrp2+/pfhrp3+	ERR1081257	NA	70.532	FALSE
Mauritania	Aioun	2014	FP0044-C	NA	West Africa	West Africa	AFRICA	TRUE	present	present	present	pfhrp2+/pfhrp3+	ERR1099215	NA	184.471	FALSE
Mauritania	Hodh el Gharbi	2014	FP0045-CW	NA	West Africa	West Africa	AFRICA	TRUE	present	present	present	pfhrp2+/pfhrp3+	ERR2889619	NA	141.853	FALSE
Mauritania	Aioun	2014	FP0046-C	NA	West Africa	West Africa	AFRICA	TRUE	present	present	present	pfhrp2+/pfhrp3+	ERR1081258	NA	205.423	FALSE
Mauritania	Aioun	2014	FP0047-C	NA	West Africa	West Africa	AFRICA	TRUE	present	present	present	pfhrp2+/pfhrp3+	ERR1081259	NA	97.3522	FALSE
Mauritania	Aioun	2014	FP0048-C	NA	West Africa	West Africa	AFRICA	TRUE	present	present	present	pfhrp2+/pfhrp3+	ERR1081260	NA	181.928	FALSE
Mauritania	Hodh el Gharbi	2014	FP0050-CW	NA	West Africa	West Africa	AFRICA	TRUE	present	present	present	pfhrp2+/pfhrp3+	ERR2889622	NA	87.8897	FALSE
Mauritania	Selibaby	2014	FP0051-C	NA	West Africa	West Africa	AFRICA	TRUE	present	present	present	pfhrp2+/pfhrp3+	ERR1081261	NA	170.647	FALSE
Mauritania	Selibaby	2014	FP0052-C	NA	West Africa	West Africa	AFRICA	TRUE	present	present	present	pfhrp2+/pfhrp3+	ERR1081262	NA	97.3229	FALSE
Mauritania	Selibaby	2014	FP0054-C	NA	West Africa	West Africa	AFRICA	TRUE	present	present	present	pfhrp2+/pfhrp3+	ERR1081263	NA	129.642	FALSE
Mauritania	Selibaby	2014	FP0055-C	NA	West Africa	West Africa	AFRICA	TRUE	present	present	present	pfhrp2+/pfhrp3+	ERR1081264	NA	172.388	FALSE
Mauritania	Selibaby	2014	FP0056-C	NA	West Africa	West Africa	AFRICA	TRUE	present	present	present	pfhrp2+/pfhrp3+	ERR1081265	NA	150.103	FALSE
Mauritania	Selibaby	2014	FP0057-C	NA	West Africa	West Africa	AFRICA	TRUE	present	present	present	pfhrp2+/pfhrp3+	ERR1081266	NA	100.175	FALSE
Mauritania	Selibaby	2014	FP0058-C	NA	West Africa	West Africa	AFRICA	TRUE	present	present	present	pfhrp2+/pfhrp3+	ERR1081267	NA	128.494	FALSE
Mauritania	Selibaby	2014	FP0059-C	NA	West Africa	West Africa	AFRICA	TRUE	present	present	present	pfhrp2+/pfhrp3+	ERR1081268	NA	113.902	FALSE
Mauritania	Selibaby	2014	FP0061-C	NA	West Africa	West Africa	AFRICA	TRUE	present	present	present	pfhrp2+/pfhrp3+	ERR1081269	NA	159.002	FALSE
Mauritania	Selibaby	2014	FP0062-C	NA	West Africa	West Africa	AFRICA	TRUE	present	present	present	pfhrp2+/pfhrp3+	ERR1081270	NA	125.793	FALSE
Mauritania	Selibaby	2014	FP0063-C	NA	West Africa	West Africa	AFRICA	TRUE	present	present	present	pfhrp2+/pfhrp3+	ERR1081271	NA	159.924	FALSE
Mauritania	Selibaby	2014	FP0064-C	NA	West Africa	West Africa	AFRICA	TRUE	uncallable	uncallable	uncallable	uncallable	ERR1081272	NA	4.13792	TRUE
Mauritania	Selibaby	2014	FP0065-C	NA	West Africa	West Africa	AFRICA	TRUE	present	present	present	pfhrp2+/pfhrp3+	ERR1081273	NA	156.673	FALSE
Mauritania	Selibaby	2014	FP0066-C	NA	West Africa	West Africa	AFRICA	TRUE	present	present	present	pfhrp2+/pfhrp3+	ERR1081274	NA	163.582	FALSE
Mauritania	Selibaby	2014	FP0067-C	NA	West Africa	West Africa	AFRICA	TRUE	present	present	present	pfhrp2+/pfhrp3+	ERR1081275	NA	178.482	FALSE
Mauritania	Selibaby	2014	FP0068-C	NA	West Africa	West Africa	AFRICA	TRUE	present	present	present	pfhrp2+/pfhrp3+	ERR1081276	NA	187.619	FALSE
Mauritania	Selibaby	2014	FP0069-C	NA	West Africa	West Africa	AFRICA	TRUE	present	present	present	pfhrp2+/pfhrp3+	ERR1081277	NA	213.94	FALSE
Mauritania	Selibaby	2014	FP0070-C	NA	West Africa	West Africa	AFRICA	TRUE	uncallable	uncallable	uncallable	uncallable	ERR1081278	NA	5.75444	TRUE
Mauritania	Selibaby	2014	FP0073-C	NA	West Africa	West Africa	AFRICA	TRUE	present	present	present	pfhrp2+/pfhrp3+	ERR1081279	NA	18.6289	FALSE
Mauritania	Guidimaka	2014	FP0075-CW	NA	West Africa	West Africa	AFRICA	TRUE	present	present	present	pfhrp2+/pfhrp3+	ERR2889625	NA	123.797	FALSE
Mauritania	Guidimaka	2014	FP0076-CW	NA	West Africa	West Africa	AFRICA	TRUE	present	present	present	pfhrp2+/pfhrp3+	ERR2889628	NA	108.539	FALSE
Mauritania	Selibaby	2014	FP0077-C	NA	West Africa	West Africa	AFRICA	TRUE	present	present	present	pfhrp2+/pfhrp3+	ERR1081280	NA	51.1446	FALSE
Mauritania	Selibaby	2014	FP0078-C	NA	West Africa	West Africa	AFRICA	TRUE	present	present	present	pfhrp2+/pfhrp3+	ERR1081281	NA	217.931	FALSE
Mauritania	Nema	2014	FP0081-C	NA	West Africa	West Africa	AFRICA	TRUE	present	present	present	pfhrp2+/pfhrp3+	ERR1081282	NA	28.0501	FALSE
Mauritania	Nema	2014	FP0082-C	NA	West Africa	West Africa	AFRICA	TRUE	present	present	present	pfhrp2+/pfhrp3+	ERR1081283	NA	76.7921	FALSE
Mauritania	Nema	2014	FP0083-CW	NA	West Africa	West Africa	AFRICA	TRUE	present	present	present	pfhrp2+/pfhrp3+	ERR2889630	NA	149.537	FALSE
Mauritania	Nema	2014	FP0084-C	NA	West Africa	West Africa	AFRICA	TRUE	present	present	present	pfhrp2+/pfhrp3+	ERR1081284	NA	156.108	FALSE
Mauritania	Nema	2014	FP0089-C	NA	West Africa	West Africa	AFRICA	TRUE	present	present	present	pfhrp2+/pfhrp3+	ERR1081285	NA	130.401	FALSE
Mauritania	Nema	2014	FP0090-C	NA	West Africa	West Africa	AFRICA	TRUE	present	present	present	pfhrp2+/pfhrp3+	ERR1081286	NA	24.4301	FALSE
Mauritania	Nema	2014	FP0092-C	NA	West Africa	West Africa	AFRICA	TRUE	present	present	present	pfhrp2+/pfhrp3+	ERR1081287	NA	170.582	FALSE
Mauritania	Nema	2014	FP0093-C	NA	West Africa	West Africa	AFRICA	TRUE	present	present	present	pfhrp2+/pfhrp3+	ERR1106549	NA	209.533	FALSE
Mauritania	Nema	2014	FP0094-CW	NA	West Africa	West Africa	AFRICA	TRUE	present	present	present	pfhrp2+/pfhrp3+	ERR2889632	NA	137.655	FALSE
Mauritania	Nema	2014	FP0095-C	NA	West Africa	West Africa	AFRICA	TRUE	present	present	present	pfhrp2+/pfhrp3+	ERR1106550	NA	177.465	FALSE
Mauritania	Nema	2014	FP0096-C	NA	West Africa	West Africa	AFRICA	TRUE	present	present	present	pfhrp2+/pfhrp3+	ERR1106551	NA	194.335	FALSE
Mauritania	Nema	2014	FP0097-C	NA	West Africa	West Africa	AFRICA	TRUE	present	present	present	pfhrp2+/pfhrp3+	ERR1106552	NA	231.934	FALSE
Mauritania	Nema	2014	FP0098-C	NA	West Africa	West Africa	AFRICA	TRUE	present	present	present	pfhrp2+/pfhrp3+	ERR1106553	NA	165.86	FALSE
Mauritania	Nema	2014	FP0099-CW	NA	West Africa	West Africa	AFRICA	TRUE	present	present	present	pfhrp2+/pfhrp3+	ERR2889634	NA	81.8045	FALSE
Mauritania	Nema	2014	FP0100-CW	NA	West Africa	West Africa	AFRICA	TRUE	present	present	present	pfhrp2+/pfhrp3+	ERR2889636	NA	86.1378	FALSE
Mauritania	Nema	2014	FP0101-C	NA	West Africa	West Africa	AFRICA	TRUE	present	present	present	pfhrp2+/pfhrp3+	ERR1106554	NA	219.2	FALSE
Mauritania	Nema	2014	FP0102-C	NA	West Africa	West Africa	AFRICA	TRUE	present	present	present	pfhrp2+/pfhrp3+	ERR1099217	NA	24.1442	FALSE
Mauritania	Nema	2014	FP0103-C	NA	West Africa	West Africa	AFRICA	TRUE	present	present	present	pfhrp2+/pfhrp3+	ERR1106556	NA	51.0447	FALSE
Mauritania	Nema	2014	FP0105-C	NA	West Africa	West Africa	AFRICA	TRUE	present	present	present	pfhrp2+/pfhrp3+	ERR1106557	NA	186.416	FALSE
Mauritania	Nema	2014	FP0106-C	NA	West Africa	West Africa	AFRICA	TRUE	uncallable	uncallable	uncallable	uncallable	ERR1106558	NA	0.0897728	TRUE
Mauritania	Nema	2014	FP0109-C	NA	West Africa	West Africa	AFRICA	TRUE	uncallable	uncallable	uncallable	uncallable	ERR1106559	NA	5.93433	TRUE
Mauritania	Nema	2014	FP0110-C	NA	West Africa	West Africa	AFRICA	TRUE	uncallable	uncallable	uncallable	uncallable	ERR1106560	NA	0.18368	TRUE
Mauritania	Nema	2014	FP0112-C	NA	West Africa	West Africa	AFRICA	TRUE	present	present	present	pfhrp2+/pfhrp3+	ERR1106561	NA	92.4267	FALSE
Mauritania	Nema	2014	FP0113-C	NA	West Africa	West Africa	AFRICA	TRUE	uncallable	uncallable	uncallable	uncallable	ERR1106562	NA	8.99204	TRUE
Mauritania	Nema	2014	FP0114-C	NA	West Africa	West Africa	AFRICA	TRUE	present	present	present	pfhrp2+/pfhrp3+	ERR1106563	NA	217.875	FALSE
Mauritania	Nema	2014	FP0116-C	NA	West Africa	West Africa	AFRICA	TRUE	present	present	present	pfhrp2+/pfhrp3+	ERR1106564	NA	31.8266	FALSE
Mauritania	Nema	2014	FP0117-C	NA	West Africa	West Africa	AFRICA	TRUE	present	present	present	pfhrp2+/pfhrp3+	ERR1106565	NA	27.5912	FALSE
Mauritania	Nema	2014	FP0119-C	NA	West Africa	West Africa	AFRICA	TRUE	present	present	present	pfhrp2+/pfhrp3+	ERR1106566	NA	135.773	FALSE
Mauritania	Nema	2014	FP0120-C	NA	West Africa	West Africa	AFRICA	TRUE	present	present	present	pfhrp2+/pfhrp3+	ERR1106567	NA	115.687	FALSE
Mauritania	Nema	2014	FP0123-C	NA	West Africa	West Africa	AFRICA	TRUE	present	present	present	pfhrp2+/pfhrp3+	ERR1106568	NA	23.5575	FALSE
Mauritania	Nema	2014	FP0127-C	NA	West Africa	West Africa	AFRICA	TRUE	present	present	present	pfhrp2+/pfhrp3+	ERR1106569	NA	63.3303	FALSE
Mauritania	Nema	2014	FP0128-C	NA	West Africa	West Africa	AFRICA	TRUE	uncallable	uncallable	uncallable	uncallable	ERR1106570	NA	2.33048	TRUE
Mauritania	Nema	2014	FP0129-C	NA	West Africa	West Africa	AFRICA	TRUE	present	present	present	pfhrp2+/pfhrp3+	ERR1106571	NA	114.947	FALSE
Mauritania	Nema	2014	FP0132-C	NA	West Africa	West Africa	AFRICA	TRUE	present	present	present	pfhrp2+/pfhrp3+	ERR2889623	NA	111.722	FALSE
Mauritania	Nema	2014	FP0133-C	NA	West Africa	West Africa	AFRICA	TRUE	present	present	present	pfhrp2+/pfhrp3+	ERR2889626	NA	79.5913	FALSE
Mauritania	Nema	2014	FP0136-C	NA	West Africa	West Africa	AFRICA	TRUE	present	present	present	pfhrp2+/pfhrp3+	ERR1106573	NA	9.29344	FALSE
Mauritania	Nema	2014	FP0139-C	NA	West Africa	West Africa	AFRICA	TRUE	uncallable	uncallable	uncallable	uncallable	ERR1106574	NA	0.27605	TRUE
Guyana	NA	2020	G1P076	NA	South America - Central	South America	S_AMERICA	TRUE	uncallable	uncallable	uncallable	uncallable	SRR15670486	NA	14.8744	TRUE
Guyana	NA	2020	G1P100	NA	South America - Central	South America	S_AMERICA	TRUE	present	present	present	pfhrp2+/pfhrp3+	SRR15670484	NA	27.3686	FALSE
Guyana	NA	2020	G1P101	NA	South America - Central	South America	S_AMERICA	TRUE	present	present	present	pfhrp2+/pfhrp3+	SRR15670483	NA	33.9115	FALSE
Guyana	NA	2020	G1P105	NA	South America - Central	South America	S_AMERICA	TRUE	present	present	present	pfhrp2+/pfhrp3+	SRR15670485	NA	19.1285	FALSE
Guyana	NA	2020	G1P166	NA	South America - Central	South America	S_AMERICA	TRUE	present	present	present	pfhrp2+/pfhrp3+	SRR15670497	NA	34.0554	FALSE
Guyana	NA	2020	G1P167	NA	South America - Central	South America	S_AMERICA	TRUE	present	present	present	pfhrp2+/pfhrp3+	SRR15670493	NA	26.5857	FALSE
Guyana	NA	2020	G1P168	NA	South America - Central	South America	S_AMERICA	TRUE	present	present	present	pfhrp2+/pfhrp3+	SRR15670481	NA	42.0408	FALSE
Guyana	NA	2020	G1P170	NA	South America - Central	South America	S_AMERICA	TRUE	present	present	present	pfhrp2+/pfhrp3+	SRR15670482	NA	60.3457	FALSE
Guyana	NA	2020	G1P172	NA	South America - Central	South America	S_AMERICA	TRUE	present	present	present	pfhrp2+/pfhrp3+	SRR15670495	NA	41.86	FALSE
Guyana	NA	2020	G1P173	NA	South America - Central	South America	S_AMERICA	TRUE	uncallable	uncallable	uncallable	uncallable	SRR15670492	NA	14.3808	TRUE
Guyana	NA	2020	G1P175	NA	South America - Central	South America	S_AMERICA	TRUE	present	present	present	pfhrp2+/pfhrp3+	SRR15670494	NA	32.161	FALSE
Guyana	NA	2020	G1P176	NA	South America - Central	South America	S_AMERICA	TRUE	present	present	present	pfhrp2+/pfhrp3+	SRR15670496	NA	24.1484	FALSE
French Guiana	NA	NA	G224	NA	South America - Central	South America	S_AMERICA	TRUE	present	present	present	pfhrp2+/pfhrp3+	SRR834926	NA	104.635	FALSE
Guyana	NA	2020	G4G278	NA	South America - Central	South America	S_AMERICA	TRUE	present	present	present	pfhrp2+/pfhrp3+	SRR15670487	NA	23.0902	FALSE
Guyana	NA	2020	G4G281	NA	South America - Central	South America	S_AMERICA	TRUE	present	present	present	pfhrp2+/pfhrp3+	SRR15670488	NA	42.7073	FALSE
Guyana	NA	2020	G4G282	NA	South America - Central	South America	S_AMERICA	TRUE	present	present	present	pfhrp2+/pfhrp3+	SRR15670489	NA	65.9302	FALSE
Guyana	NA	2020	G4G284	NA	South America - Central	South America	S_AMERICA	TRUE	uncallable	uncallable	uncallable	uncallable	SRR15670490	NA	12.5017	TRUE
French Guiana	NA	NA	H209	NA	South America - Central	South America	S_AMERICA	TRUE	present	present	present	pfhrp2+/pfhrp3+	SRR834925	NA	94.4544	FALSE
Guinea	LabIsolate	2010	NF166	NA	West Africa	West Africa	AFRICA	FALSE	present	present	present	pfhrp2+/pfhrp3+	SRR5360997	NA	281.072	FALSE
Brazil	Mancio Lima	2016	IGS-BRA-003sA	NA	South America - Central	South America	S_AMERICA	TRUE	present	present	present	pfhrp2+/pfhrp3+	SRR7464746,SRR7464747	NA	266.639	FALSE
Brazil	Mancio Lima	2016	IGS-BRA-007sA	NA	South America - Central	South America	S_AMERICA	TRUE	present	present	present	pfhrp2+/pfhrp3+	SRR7464765,SRR7464766	NA	286.693	FALSE
Brazil	Mancio Lima	2016	IGS-BRA-016sA	NA	South America - Central	South America	S_AMERICA	TRUE	uncallable	uncallable	uncallable	uncallable	SRR7464773,SRR7464774	NA	271.882	TRUE
Brazil	Cruzeiro do Sul	2016	IGS-BRA-018sA	NA	South America - Central	South America	S_AMERICA	TRUE	uncallable	uncallable	uncallable	uncallable	SRR7464777,SRR7464778	NA	286.328	TRUE
Cambodia	NA	2010	IGS-CBD-004	NA	South East Asia - East	Oceania-SEA	ASIA	TRUE	present	present	present	pfhrp2+/pfhrp3+	SRR5346267,SRR5346268,SRR5360211	NA	218.555	FALSE
Cambodia	NA	2010	IGS-CBD-005	NA	South East Asia - East	Oceania-SEA	ASIA	TRUE	present	present	present	pfhrp2+/pfhrp3+	SRR5360247,SRR5360248,SRR5360249,SRR5360250	NA	207.316	FALSE
Cambodia	NA	2010	IGS-CBD-006	NA	South East Asia - East	Oceania-SEA	ASIA	TRUE	present	present	present	pfhrp2+/pfhrp3+	SRR5360269,SRR5360270,SRR5360271,SRR5360272	NA	144.29	FALSE
Cambodia	NA	2010	IGS-CBD-007	NA	South East Asia - East	Oceania-SEA	ASIA	TRUE	present	present	present	pfhrp2+/pfhrp3+	SRR5346276	NA	86.7886	FALSE
Cambodia	NA	2010	IGS-CBD-008	NA	South East Asia - East	Oceania-SEA	ASIA	TRUE	uncallable	uncallable	uncallable	uncallable	SRR5346277	NA	6.04009	TRUE
Cambodia	NA	2010	IGS-CBD-009	NA	South East Asia - East	Oceania-SEA	ASIA	TRUE	present	present	present	pfhrp2+/pfhrp3+	SRR5346278,SRR5360219,SRR5360220,SRR5360221	NA	204.448	FALSE
Cambodia	NA	2010	IGS-CBD-011	NA	South East Asia - East	Oceania-SEA	ASIA	TRUE	uncallable	uncallable	uncallable	uncallable	SRR5346282	NA	2.76557	TRUE
Cambodia	NA	2010	IGS-CBD-012	NA	South East Asia - East	Oceania-SEA	ASIA	TRUE	present	present	present	pfhrp2+/pfhrp3+	SRR5346281	NA	182.756	FALSE
Cambodia	NA	2010	IGS-CBD-013	NA	South East Asia - East	Oceania-SEA	ASIA	TRUE	present	present	present	pfhrp2+/pfhrp3+	SRR5346283	NA	111.168	FALSE
Cambodia	NA	2011	IGS-CBD-014	NA	South East Asia - East	Oceania-SEA	ASIA	TRUE	present	present	present	pfhrp2+/pfhrp3+	SRR5360283,SRR5360284	NA	72.1982	FALSE
Cambodia	NA	2011	IGS-CBD-016	NA	South East Asia - East	Oceania-SEA	ASIA	TRUE	present	present	present	pfhrp2+/pfhrp3+	SRR5346285	NA	178.987	FALSE
Cambodia	NA	2011	IGS-CBD-017	NA	South East Asia - East	Oceania-SEA	ASIA	TRUE	uncallable	uncallable	uncallable	uncallable	SRR5346271	NA	14.2752	TRUE
Cambodia	NA	2011	IGS-CBD-018	NA	South East Asia - East	Oceania-SEA	ASIA	TRUE	present	present	present	pfhrp2+/pfhrp3+	SRR5346272	NA	138.315	FALSE
Cambodia	NA	2011	IGS-CBD-019	NA	South East Asia - East	Oceania-SEA	ASIA	TRUE	present	present	present	pfhrp2+/pfhrp3+	SRR5360291,SRR5360293,SRR5360294,SRR5360295	NA	171.216	FALSE
Cambodia	NA	2011	IGS-CBD-021	NA	South East Asia - East	Oceania-SEA	ASIA	TRUE	present	present	present	pfhrp2+/pfhrp3+	SRR5346298	NA	152.552	FALSE
Cambodia	NA	2011	IGS-CBD-022	NA	South East Asia - East	Oceania-SEA	ASIA	TRUE	present	present	present	pfhrp2+/pfhrp3+	SRR5346299	NA	161.673	FALSE
Cambodia	NA	2011	IGS-CBD-023	NA	South East Asia - East	Oceania-SEA	ASIA	TRUE	present	present	present	pfhrp2+/pfhrp3+	SRR5360304,SRR5360306,SRR5360307,SRR5360308	NA	162.165	FALSE
Cambodia	NA	2011	IGS-CBD-024	NA	South East Asia - East	Oceania-SEA	ASIA	TRUE	present	present	present	pfhrp2+/pfhrp3+	SRR5346301	NA	95.7141	FALSE
Cambodia	NA	2011	IGS-CBD-025	NA	South East Asia - East	Oceania-SEA	ASIA	TRUE	present	present	present	pfhrp2+/pfhrp3+	SRR5346302	NA	108.313	FALSE
Cambodia	NA	2011	IGS-CBD-026	NA	South East Asia - East	Oceania-SEA	ASIA	TRUE	present	present	present	pfhrp2+/pfhrp3+	SRR5346304	NA	139.219	FALSE
Cambodia	NA	2011	IGS-CBD-027	NA	South East Asia - East	Oceania-SEA	ASIA	TRUE	present	present	present	pfhrp2+/pfhrp3+	SRR5346341,SRR5360369	NA	92.272	FALSE
Cambodia	NA	2011	IGS-CBD-028	NA	South East Asia - East	Oceania-SEA	ASIA	TRUE	present	present	present	pfhrp2+/pfhrp3+	SRR5346343	NA	150.119	FALSE
Cambodia	NA	2011	IGS-CBD-029	NA	South East Asia - East	Oceania-SEA	ASIA	TRUE	present	present	present	pfhrp2+/pfhrp3+	SRR5346345	NA	111.614	FALSE
Cambodia	NA	2011	IGS-CBD-030	NA	South East Asia - East	Oceania-SEA	ASIA	TRUE	present	present	present	pfhrp2+/pfhrp3+	SRR5360311,SRR5360312,SRR5360313	NA	234.319	FALSE
Cambodia	NA	2011	IGS-CBD-032	NA	South East Asia - East	Oceania-SEA	ASIA	TRUE	present	present	present	pfhrp2+/pfhrp3+	SRR5360347,SRR5360348,SRR5360349,SRR5360350	NA	160.905	FALSE
Cambodia	NA	2011	IGS-CBD-033	NA	South East Asia - East	Oceania-SEA	ASIA	TRUE	uncallable	uncallable	uncallable	uncallable	SRR5346353	NA	4.09521	TRUE
Cambodia	NA	2011	IGS-CBD-034	NA	South East Asia - East	Oceania-SEA	ASIA	TRUE	uncallable	uncallable	uncallable	uncallable	SRR5346355	NA	6.54593	TRUE
Cambodia	NA	2011	IGS-CBD-035	NA	South East Asia - East	Oceania-SEA	ASIA	TRUE	present	present	present	pfhrp2+/pfhrp3+	SRR5346354	NA	145.327	FALSE
Cambodia	NA	2011	IGS-CBD-037	NA	South East Asia - East	Oceania-SEA	ASIA	TRUE	present	present	present	pfhrp2+/pfhrp3+	SRR5360327,SRR5360329	NA	214.963	FALSE
Cambodia	NA	2011	IGS-CBD-039	NA	South East Asia - East	Oceania-SEA	ASIA	TRUE	present	present	present	pfhrp2+/pfhrp3+	SRR5346356	NA	126.085	FALSE
Cambodia	NA	2011	IGS-CBD-040	NA	South East Asia - East	Oceania-SEA	ASIA	TRUE	present	present	present	pfhrp2+/pfhrp3+	SRR5360332,SRR5360333,SRR5360334	NA	382.559	FALSE
Cambodia	NA	2011	IGS-CBD-041	NA	South East Asia - East	Oceania-SEA	ASIA	TRUE	present	present	present	pfhrp2+/pfhrp3+	SRR5346363	NA	133.607	FALSE
Cambodia	NA	2011	IGS-CBD-043	NA	South East Asia - East	Oceania-SEA	ASIA	TRUE	present	present	present	pfhrp2+/pfhrp3+	SRR5360343,SRR5360344	NA	129.878	FALSE
Cambodia	NA	2011	IGS-CBD-045	NA	South East Asia - East	Oceania-SEA	ASIA	TRUE	present	present	present	pfhrp2+/pfhrp3+	SRR5360361,SRR5360362,SRR5360363	NA	401.942	FALSE
Cambodia	NA	2011	IGS-CBD-046	NA	South East Asia - East	Oceania-SEA	ASIA	TRUE	uncallable	uncallable	uncallable	uncallable	SRR5346383	NA	5.29693	TRUE
Cambodia	NA	2011	IGS-CBD-047	NA	South East Asia - East	Oceania-SEA	ASIA	TRUE	present	present	present	pfhrp2+/pfhrp3+	SRR5346386,SRR5360366	NA	86.8079	FALSE
Cambodia	NA	2011	IGS-CBD-048	NA	South East Asia - East	Oceania-SEA	ASIA	TRUE	present	present	present	pfhrp2+/pfhrp3+	SRR5346390	NA	134.25	FALSE
Cambodia	NA	2011	IGS-CBD-049	NA	South East Asia - East	Oceania-SEA	ASIA	TRUE	uncallable	uncallable	uncallable	uncallable	SRR5346392	NA	3.64131	TRUE
Cambodia	NA	2011	IGS-CBD-050	NA	South East Asia - East	Oceania-SEA	ASIA	TRUE	present	present	present	pfhrp2+/pfhrp3+	SRR5360418,SRR5360419,SRR5360420	NA	130.955	FALSE
Cambodia	NA	2011	IGS-CBD-051	NA	South East Asia - East	Oceania-SEA	ASIA	TRUE	present	present	present	pfhrp2+/pfhrp3+	SRR5360379,SRR5360380,SRR5360381	NA	242.736	FALSE
Cambodia	NA	2011	IGS-CBD-052	NA	South East Asia - East	Oceania-SEA	ASIA	TRUE	uncallable	uncallable	uncallable	uncallable	SRR5346420	NA	3.1367	TRUE
Cambodia	NA	2011	IGS-CBD-053	NA	South East Asia - East	Oceania-SEA	ASIA	TRUE	present	present	present	pfhrp2+/pfhrp3+	SRR5346423	NA	162.183	FALSE
Cambodia	NA	2011	IGS-CBD-054	NA	South East Asia - East	Oceania-SEA	ASIA	TRUE	present	present	present	pfhrp2+/pfhrp3+	SRR5346430	NA	123.797	FALSE
Cambodia	NA	2011	IGS-CBD-055	NA	South East Asia - East	Oceania-SEA	ASIA	TRUE	present	present	present	pfhrp2+/pfhrp3+	SRR5360509,SRR5360510	NA	269.722	FALSE
Cambodia	NA	2011	IGS-CBD-056	NA	South East Asia - East	Oceania-SEA	ASIA	TRUE	present	present	present	pfhrp2+/pfhrp3+	SRR5346433,SRR5360448,SRR5360449	NA	145.779	FALSE
Cambodia	NA	2011	IGS-CBD-057	NA	South East Asia - East	Oceania-SEA	ASIA	TRUE	present	present	present	pfhrp2+/pfhrp3+	SRR5360408,SRR5360409,SRR5360410,SRR5360411	NA	145.272	FALSE
Cambodia	NA	2011	IGS-CBD-058	NA	South East Asia - East	Oceania-SEA	ASIA	TRUE	present	present	present	pfhrp2+/pfhrp3+	SRR5360414,SRR5360415	NA	83.3567	FALSE
Cambodia	NA	2011	IGS-CBD-059	NA	South East Asia - East	Oceania-SEA	ASIA	TRUE	present	present	present	pfhrp2+/pfhrp3+	SRR5360452,SRR5360453,SRR5360454,SRR5360456	NA	162.321	FALSE
Cambodia	NA	2011	IGS-CBD-061	NA	South East Asia - East	Oceania-SEA	ASIA	TRUE	present	present	present	pfhrp2+/pfhrp3+	SRR5346448	NA	110.81	FALSE
Cambodia	NA	2011	IGS-CBD-062	NA	South East Asia - East	Oceania-SEA	ASIA	TRUE	present	present	present	pfhrp2+/pfhrp3+	SRR5346450	NA	157.779	FALSE
Cambodia	NA	2011	IGS-CBD-063	NA	South East Asia - East	Oceania-SEA	ASIA	TRUE	present	present	present	pfhrp2+/pfhrp3+	SRR5346471,SRR5346472,SRR5360473,SRR5360474,SRR5360475	NA	132.347	FALSE
Cambodia	NA	2011	IGS-CBD-064	NA	South East Asia - East	Oceania-SEA	ASIA	TRUE	present	present	present	pfhrp2+/pfhrp3+	SRR5360424,SRR5360425,SRR5360426,SRR5360427	NA	112.833	FALSE
Cambodia	NA	2011	IGS-CBD-065	NA	South East Asia - East	Oceania-SEA	ASIA	TRUE	uncallable	uncallable	uncallable	uncallable	SRR5346476,SRR5346477	NA	0.668412	TRUE
Cambodia	NA	2011	IGS-CBD-066	NA	South East Asia - East	Oceania-SEA	ASIA	TRUE	present	present	present	pfhrp2+/pfhrp3+	SRR5360430,SRR5360431	NA	168.75	FALSE
Cambodia	NA	2011	IGS-CBD-067	NA	South East Asia - East	Oceania-SEA	ASIA	TRUE	present	present	present	pfhrp2+/pfhrp3+	SRR5346481,SRR5360443,SRR5360444,SRR5360445	NA	119.957	FALSE
Cambodia	NA	2011	IGS-CBD-068	NA	South East Asia - East	Oceania-SEA	ASIA	TRUE	present	present	present	pfhrp2+/pfhrp3+	SRR5346484	NA	153.219	FALSE
Cambodia	NA	2011	IGS-CBD-069	NA	South East Asia - East	Oceania-SEA	ASIA	TRUE	present	present	present	pfhrp2+/pfhrp3+	SRR5360463,SRR5360464,SRR5360465,SRR5360466	NA	175.487	FALSE
Cambodia	NA	2011	IGS-CBD-070	NA	South East Asia - East	Oceania-SEA	ASIA	TRUE	uncallable	uncallable	uncallable	uncallable	SRR5346489	NA	8.21138	TRUE
Cambodia	NA	2011	IGS-CBD-071	NA	South East Asia - East	Oceania-SEA	ASIA	TRUE	present	present	present	pfhrp2+/pfhrp3+	SRR5360522,SRR5360523,SRR5360524,SRR5360525	NA	156.663	FALSE
Cambodia	NA	2011	IGS-CBD-072	NA	South East Asia - East	Oceania-SEA	ASIA	TRUE	present	present	present	pfhrp2+/pfhrp3+	SRR5346497	NA	186.952	FALSE
Cambodia	NA	2011	IGS-CBD-073	NA	South East Asia - East	Oceania-SEA	ASIA	TRUE	uncallable	uncallable	uncallable	uncallable	SRR5346498	NA	4.62597	TRUE
Cambodia	NA	2011	IGS-CBD-074	NA	South East Asia - East	Oceania-SEA	ASIA	TRUE	present	present	present	pfhrp2+/pfhrp3+	SRR5360505,SRR5360506	NA	122.688	FALSE
Cambodia	NA	2011	IGS-CBD-075	NA	South East Asia - East	Oceania-SEA	ASIA	TRUE	present	present	present	pfhrp2+/pfhrp3+	SRR5360458,SRR5360459	NA	132.031	FALSE
Cambodia	NA	2011	IGS-CBD-076	NA	South East Asia - East	Oceania-SEA	ASIA	TRUE	uncallable	uncallable	uncallable	uncallable	SRR5346499	NA	0.356414	TRUE
Cambodia	NA	2011	IGS-CBD-077	NA	South East Asia - East	Oceania-SEA	ASIA	TRUE	present	present	present	pfhrp2+/pfhrp3+	SRR5360478,SRR5360479,SRR5360480	NA	344.641	FALSE
Cambodia	NA	2011	IGS-CBD-078	NA	South East Asia - East	Oceania-SEA	ASIA	TRUE	present	present	present	pfhrp2+/pfhrp3+	SRR5346500	NA	146.797	FALSE
Cambodia	NA	2011	IGS-CBD-079	NA	South East Asia - East	Oceania-SEA	ASIA	TRUE	present	present	present	pfhrp2+/pfhrp3+	SRR5346501	NA	135.792	FALSE
Cambodia	NA	2011	IGS-CBD-080	NA	South East Asia - East	Oceania-SEA	ASIA	TRUE	present	present	present	pfhrp2+/pfhrp3+	SRR5346504,SRR5360502	NA	162.995	FALSE
Cambodia	NA	2011	IGS-CBD-081	NA	South East Asia - East	Oceania-SEA	ASIA	TRUE	present	present	present	pfhrp2+/pfhrp3+	SRR5360488,SRR5360489,SRR5360490	NA	329.82	FALSE
Cambodia	NA	2011	IGS-CBD-082	NA	South East Asia - East	Oceania-SEA	ASIA	TRUE	uncallable	uncallable	uncallable	uncallable	SRR5346502	NA	6.68987	TRUE
Cambodia	NA	2011	IGS-CBD-083	NA	South East Asia - East	Oceania-SEA	ASIA	TRUE	present	present	present	pfhrp2+/pfhrp3+	SRR5346503	NA	124.568	FALSE
Cambodia	NA	2011	IGS-CBD-084	NA	South East Asia - East	Oceania-SEA	ASIA	TRUE	present	present	present	pfhrp2+/pfhrp3+	SRR5360108,SRR5360109,SRR5360110,SRR5360111,SRR5360112	NA	137.548	FALSE
Cambodia	NA	2011	IGS-CBD-085	NA	South East Asia - East	Oceania-SEA	ASIA	TRUE	present	present	present	pfhrp2+/pfhrp3+	SRR5346508	NA	91.7439	FALSE
Cambodia	NA	2011	IGS-CBD-086	NA	South East Asia - East	Oceania-SEA	ASIA	TRUE	present	present	present	pfhrp2+/pfhrp3+	SRR5360113,SRR5360114	NA	77.2997	FALSE
Cambodia	NA	2011	IGS-CBD-087	NA	South East Asia - East	Oceania-SEA	ASIA	TRUE	present	present	present	pfhrp2+/pfhrp3+	SRR5360115,SRR5360116,SRR5360117	NA	281.732	FALSE
Cambodia	NA	2011	IGS-CBD-088	NA	South East Asia - East	Oceania-SEA	ASIA	TRUE	present	present	present	pfhrp2+/pfhrp3+	SRR5346505	NA	155.036	FALSE
Cambodia	NA	2011	IGS-CBD-089	NA	South East Asia - East	Oceania-SEA	ASIA	TRUE	present	present	present	pfhrp2+/pfhrp3+	SRR5346506	NA	149.894	FALSE
Cambodia	NA	2011	IGS-CBD-090	NA	South East Asia - East	Oceania-SEA	ASIA	TRUE	present	present	present	pfhrp2+/pfhrp3+	SRR5346507	NA	95.5184	FALSE
Cambodia	NA	2011	IGS-CBD-091	NA	South East Asia - East	Oceania-SEA	ASIA	TRUE	present	present	present	pfhrp2+/pfhrp3+	SRR5360118,SRR5360119,SRR5360120,SRR5360121	NA	363.414	FALSE
Cambodia	NA	2011	IGS-CBD-092	NA	South East Asia - East	Oceania-SEA	ASIA	TRUE	present	present	present	pfhrp2+/pfhrp3+	SRR5346509	NA	156.496	FALSE
Cambodia	NA	2011	IGS-CBD-094	NA	South East Asia - East	Oceania-SEA	ASIA	TRUE	uncallable	uncallable	uncallable	uncallable	SRR5346511	NA	7.3149	TRUE
Cambodia	NA	2011	IGS-CBD-095	NA	South East Asia - East	Oceania-SEA	ASIA	TRUE	present	present	present	pfhrp2+/pfhrp3+	SRR5346517,SRR5360208	NA	98.9269	FALSE
Cambodia	NA	2011	IGS-CBD-096	NA	South East Asia - East	Oceania-SEA	ASIA	TRUE	present	present	present	pfhrp2+/pfhrp3+	SRR5346518	NA	128.388	FALSE
Cambodia	NA	2011	IGS-CBD-097	NA	South East Asia - East	Oceania-SEA	ASIA	TRUE	present	present	present	pfhrp2+/pfhrp3+	SRR5360128,SRR5360129,SRR5360130	NA	214.864	FALSE
Cambodia	NA	2011	IGS-CBD-098	NA	South East Asia - East	Oceania-SEA	ASIA	TRUE	present	present	present	pfhrp2+/pfhrp3+	SRR5346512,SRR5360124,SRR5360125,SRR5360126	NA	120.725	FALSE
Cambodia	NA	2011	IGS-CBD-099	NA	South East Asia - East	Oceania-SEA	ASIA	TRUE	uncallable	uncallable	uncallable	uncallable	SRR5346514	NA	2.54955	TRUE
Cambodia	NA	2011	IGS-CBD-100	NA	South East Asia - East	Oceania-SEA	ASIA	TRUE	present	present	present	pfhrp2+/pfhrp3+	SRR5346513	NA	152.965	FALSE
Cambodia	NA	2011	IGS-CBD-101	NA	South East Asia - East	Oceania-SEA	ASIA	TRUE	uncallable	uncallable	uncallable	uncallable	SRR5346515	NA	5.68021	TRUE
Cambodia	NA	2011	IGS-CBD-102	NA	South East Asia - East	Oceania-SEA	ASIA	TRUE	present	present	present	pfhrp2+/pfhrp3+	SRR5346516,SRR5360143,SRR5360144,SRR5360145	NA	135.046	FALSE
Cambodia	NA	2011	IGS-CBD-103	NA	South East Asia - East	Oceania-SEA	ASIA	TRUE	present	present	present	pfhrp2+/pfhrp3+	SRR5360122,SRR5360123	NA	115.923	FALSE
Cambodia	NA	2011	IGS-CBD-104	NA	South East Asia - East	Oceania-SEA	ASIA	TRUE	present	present	present	pfhrp2+/pfhrp3+	SRR5360148,SRR5360149	NA	74.1807	FALSE
Cambodia	NA	2011	IGS-CBD-105	NA	South East Asia - East	Oceania-SEA	ASIA	TRUE	present	present	present	pfhrp2+/pfhrp3+	SRR5360131,SRR5360132,SRR5360133,SRR5360134	NA	216.078	FALSE
Cambodia	NA	2011	IGS-CBD-106	NA	South East Asia - East	Oceania-SEA	ASIA	TRUE	present	present	present	pfhrp2+/pfhrp3+	SRR5346519	NA	78.9973	FALSE
Cambodia	NA	2011	IGS-CBD-107	NA	South East Asia - East	Oceania-SEA	ASIA	TRUE	present	present	present	pfhrp2+/pfhrp3+	SRR5346520	NA	152.834	FALSE
Cambodia	NA	2011	IGS-CBD-108	NA	South East Asia - East	Oceania-SEA	ASIA	TRUE	present	present	present	pfhrp2+/pfhrp3+	SRR5360395,SRR5360396,SRR5360397,SRR5360398	NA	190.083	FALSE
Cambodia	NA	2011	IGS-CBD-109	NA	South East Asia - East	Oceania-SEA	ASIA	TRUE	present	present	present	pfhrp2+/pfhrp3+	SRR5360176,SRR5360177,SRR5360178,SRR5360179	NA	176.06	FALSE
Cambodia	NA	2011	IGS-CBD-110	NA	South East Asia - East	Oceania-SEA	ASIA	TRUE	present	present	present	pfhrp2+/pfhrp3+	SRR5360172,SRR5360173	NA	190.382	FALSE
Cambodia	NA	2011	IGS-CBD-111	NA	South East Asia - East	Oceania-SEA	ASIA	TRUE	present	present	present	pfhrp2+/pfhrp3+	SRR5360139,SRR5360140,SRR5360141,SRR5360142	NA	329.509	FALSE
Cambodia	NA	2011	IGS-CBD-112	NA	South East Asia - East	Oceania-SEA	ASIA	TRUE	present	present	present	pfhrp2+/pfhrp3+	SRR5360156,SRR5360157,SRR5360158,SRR5360159	NA	175.614	FALSE
Cambodia	NA	2011	IGS-CBD-113	NA	South East Asia - East	Oceania-SEA	ASIA	TRUE	present	present	present	pfhrp2+/pfhrp3+	SRR5346581	NA	144.786	FALSE
Cambodia	NA	2011	IGS-CBD-114	NA	South East Asia - East	Oceania-SEA	ASIA	TRUE	present	present	present	pfhrp2+/pfhrp3+	SRR5346582	NA	83.2479	FALSE
Cambodia	NA	2011	IGS-CBD-115	NA	South East Asia - East	Oceania-SEA	ASIA	TRUE	present	present	present	pfhrp2+/pfhrp3+	SRR5346583	NA	92.2433	FALSE
Cambodia	NA	2011	IGS-CBD-116	NA	South East Asia - East	Oceania-SEA	ASIA	TRUE	present	present	present	pfhrp2+/pfhrp3+	SRR5360317,SRR5360318,SRR5360319	NA	114.347	FALSE
Cambodia	NA	2011	IGS-CBD-117	NA	South East Asia - East	Oceania-SEA	ASIA	TRUE	present	present	present	pfhrp2+/pfhrp3+	SRR5346584	NA	130.916	FALSE
Cambodia	NA	2011	IGS-CBD-118	NA	South East Asia - East	Oceania-SEA	ASIA	TRUE	present	present	present	pfhrp2+/pfhrp3+	SRR5346585,SRR5360165,SRR5360166	NA	289.06	FALSE
Cambodia	NA	2012	IGS-CBD-119	NA	South East Asia - East	Oceania-SEA	ASIA	TRUE	present	present	present	pfhrp2+/pfhrp3+	SRR5360135,SRR5360136,SRR5360137,SRR5360138	NA	174.229	FALSE
Cambodia	NA	2012	IGS-CBD-120	NA	South East Asia - East	Oceania-SEA	ASIA	TRUE	present	present	present	pfhrp2+/pfhrp3+	SRR5346586	NA	150.494	FALSE
Cambodia	NA	2014	IGS-CBD-123	NA	South East Asia - East	Oceania-SEA	ASIA	TRUE	present	present	present	pfhrp2+/pfhrp3+	SRR5346865	NA	259.683	FALSE
Cambodia	NA	2014	IGS-CBD-124	NA	South East Asia - East	Oceania-SEA	ASIA	TRUE	present	present	present	pfhrp2+/pfhrp3+	SRR5346866,SRR5346867	NA	278.795	FALSE
Cambodia	NA	2014	IGS-CBD-125	NA	South East Asia - East	Oceania-SEA	ASIA	TRUE	present	present	present	pfhrp2+/pfhrp3+	SRR5346868	NA	310.524	FALSE
Cambodia	NA	2014	IGS-CBD-126	NA	South East Asia - East	Oceania-SEA	ASIA	TRUE	present	present	present	pfhrp2+/pfhrp3+	SRR5360127	NA	157.956	FALSE
Cambodia	NA	2014	IGS-CBD-127	NA	South East Asia - East	Oceania-SEA	ASIA	TRUE	present	present	present	pfhrp2+/pfhrp3+	SRR5360146	NA	141.904	FALSE
Kenya	NA	2017	IGS-KEN-001	NA	East Africa	East Africa	AFRICA	TRUE	present	present	present	pfhrp2+/pfhrp3+	SRR7467112	NA	217.277	FALSE
Kenya	NA	2017	IGS-KEN-003	NA	East Africa	East Africa	AFRICA	TRUE	present	present	present	pfhrp2+/pfhrp3+	SRR7467113	NA	186.88	FALSE
Kenya	NA	2017	IGS-KEN-005	NA	East Africa	East Africa	AFRICA	TRUE	present	present	present	pfhrp2+/pfhrp3+	SRR7467146	NA	129.012	FALSE
Kenya	NA	2017	IGS-KEN-006	NA	East Africa	East Africa	AFRICA	TRUE	present	present	present	pfhrp2+/pfhrp3+	SRR7467147	NA	108.009	FALSE
Kenya	NA	2017	IGS-KEN-007	NA	East Africa	East Africa	AFRICA	TRUE	present	present	present	pfhrp2+/pfhrp3+	SRR7467148	NA	52.5822	FALSE
Mali	NA	2010	IGS-MLI-007	NA	West Africa	West Africa	AFRICA	TRUE	present	present	present	pfhrp2+/pfhrp3+	SRR5346149	NA	61.2375	FALSE
Mali	NA	2010	IGS-MLI-008	NA	West Africa	West Africa	AFRICA	TRUE	present	present	present	pfhrp2+/pfhrp3+	SRR5346150	NA	127.326	FALSE
Mali	NA	2010	IGS-MLI-009	NA	West Africa	West Africa	AFRICA	TRUE	present	present	present	pfhrp2+/pfhrp3+	SRR5346151	NA	125.891	FALSE
Mali	NA	2010	IGS-MLI-010	NA	West Africa	West Africa	AFRICA	TRUE	present	present	present	pfhrp2+/pfhrp3+	SRR5346153	NA	229.504	FALSE
Mali	NA	2010	IGS-MLI-011	NA	West Africa	West Africa	AFRICA	TRUE	present	present	present	pfhrp2+/pfhrp3+	SRR5346161	NA	116.402	FALSE
Mali	NA	2010	IGS-MLI-012	NA	West Africa	West Africa	AFRICA	TRUE	present	present	present	pfhrp2+/pfhrp3+	SRR5346160	NA	111.03	FALSE
Mali	NA	2010	IGS-MLI-013	NA	West Africa	West Africa	AFRICA	TRUE	present	present	present	pfhrp2+/pfhrp3+	SRR5346162	NA	83.5839	FALSE
Mali	NA	2010	IGS-MLI-014	NA	West Africa	West Africa	AFRICA	TRUE	present	present	present	pfhrp2+/pfhrp3+	SRR5346163	NA	150.117	FALSE
Mali	NA	2010	IGS-MLI-015	NA	West Africa	West Africa	AFRICA	TRUE	present	present	present	pfhrp2+/pfhrp3+	SRR5346164	NA	116.308	FALSE
Mali	NA	2010	IGS-MLI-016	NA	West Africa	West Africa	AFRICA	TRUE	present	present	present	pfhrp2+/pfhrp3+	SRR5346165	NA	70.2463	FALSE
Mali	NA	2010	IGS-MLI-017	NA	West Africa	West Africa	AFRICA	TRUE	present	present	present	pfhrp2+/pfhrp3+	SRR5346152	NA	119.905	FALSE
Mali	NA	2010	IGS-MLI-018	NA	West Africa	West Africa	AFRICA	TRUE	present	present	present	pfhrp2+/pfhrp3+	SRR5346154	NA	90.119	FALSE
Mali	NA	2010	IGS-MLI-019	NA	West Africa	West Africa	AFRICA	TRUE	present	present	present	pfhrp2+/pfhrp3+	SRR5346155	NA	111.635	FALSE
Mali	NA	2010	IGS-MLI-020	NA	West Africa	West Africa	AFRICA	TRUE	present	present	present	pfhrp2+/pfhrp3+	SRR5346156	NA	118.204	FALSE
Mali	NA	2010	IGS-MLI-021	NA	West Africa	West Africa	AFRICA	TRUE	present	present	present	pfhrp2+/pfhrp3+	SRR5360672,SRR5360673,SRR5360674	NA	163.548	FALSE
Mali	NA	2010	IGS-MLI-022	NA	West Africa	West Africa	AFRICA	TRUE	present	present	present	pfhrp2+/pfhrp3+	SRR5346157	NA	142.851	FALSE
Mali	NA	2010	IGS-MLI-023	NA	West Africa	West Africa	AFRICA	TRUE	present	present	present	pfhrp2+/pfhrp3+	SRR5346158	NA	142.312	FALSE
Mali	NA	2010	IGS-MLI-024	NA	West Africa	West Africa	AFRICA	TRUE	present	present	present	pfhrp2+/pfhrp3+	SRR5346159	NA	134.551	FALSE
Mali	NA	2010	IGS-MLI-025	NA	West Africa	West Africa	AFRICA	TRUE	present	present	present	pfhrp2+/pfhrp3+	SRR5346174	NA	112.229	FALSE
Mali	NA	2010	IGS-MLI-026	NA	West Africa	West Africa	AFRICA	TRUE	present	present	present	pfhrp2+/pfhrp3+	SRR5346173	NA	61.3125	FALSE
Mali	NA	2010	IGS-MLI-027	NA	West Africa	West Africa	AFRICA	TRUE	present	present	present	pfhrp2+/pfhrp3+	SRR5346175	NA	110.625	FALSE
Mali	NA	2010	IGS-MLI-028	NA	West Africa	West Africa	AFRICA	TRUE	present	present	present	pfhrp2+/pfhrp3+	SRR5346176	NA	102.851	FALSE
Mali	NA	2012	IGS-MLI-029	NA	West Africa	West Africa	AFRICA	TRUE	present	present	present	pfhrp2+/pfhrp3+	SRR5346177	NA	215.927	FALSE
Mali	NA	2010	IGS-MLI-030	NA	West Africa	West Africa	AFRICA	TRUE	present	present	present	pfhrp2+/pfhrp3+	SRR5360675,SRR5360676,SRR5360677	NA	245.917	FALSE
Mali	NA	2010	IGS-MLI-031	NA	West Africa	West Africa	AFRICA	TRUE	present	present	present	pfhrp2+/pfhrp3+	SRR5360678,SRR5360679,SRR5360680	NA	130.923	FALSE
Mali	NA	2010	IGS-MLI-032	NA	West Africa	West Africa	AFRICA	TRUE	present	present	present	pfhrp2+/pfhrp3+	SRR5346178	NA	90.0738	FALSE
Mali	NA	2010	IGS-MLI-033	NA	West Africa	West Africa	AFRICA	TRUE	present	present	present	pfhrp2+/pfhrp3+	SRR5346179	NA	103.943	FALSE
Mali	NA	2010	IGS-MLI-034	NA	West Africa	West Africa	AFRICA	TRUE	present	present	present	pfhrp2+/pfhrp3+	SRR5346180	NA	133.238	FALSE
Mali	NA	2010	IGS-MLI-035	NA	West Africa	West Africa	AFRICA	TRUE	present	present	present	pfhrp2+/pfhrp3+	SRR5346182	NA	84.7683	FALSE
Mali	NA	2010	IGS-MLI-037	NA	West Africa	West Africa	AFRICA	TRUE	present	present	present	pfhrp2+/pfhrp3+	SRR5346183	NA	167.647	FALSE
Mali	NA	2010	IGS-MLI-038	NA	West Africa	West Africa	AFRICA	TRUE	present	present	present	pfhrp2+/pfhrp3+	SRR5346184	NA	130.056	FALSE
Mali	NA	2010	IGS-MLI-039	NA	West Africa	West Africa	AFRICA	TRUE	present	present	present	pfhrp2+/pfhrp3+	SRR5346185	NA	133.106	FALSE
Mali	NA	2010	IGS-MLI-040	NA	West Africa	West Africa	AFRICA	TRUE	present	present	present	pfhrp2+/pfhrp3+	SRR5360767,SRR5360768,SRR5360769	NA	408.412	FALSE
Mali	NA	2010	IGS-MLI-041	NA	West Africa	West Africa	AFRICA	TRUE	present	present	present	pfhrp2+/pfhrp3+	SRR5346186	NA	109.582	FALSE
Mali	NA	2010	IGS-MLI-042	NA	West Africa	West Africa	AFRICA	TRUE	present	present	present	pfhrp2+/pfhrp3+	SRR5346187	NA	192.529	FALSE
Mali	NA	2010	IGS-MLI-043	NA	West Africa	West Africa	AFRICA	TRUE	present	present	present	pfhrp2+/pfhrp3+	SRR5346188	NA	114.96	FALSE
Mali	NA	2010	IGS-MLI-044	NA	West Africa	West Africa	AFRICA	TRUE	present	present	present	pfhrp2+/pfhrp3+	SRR5360770,SRR5360771,SRR5360772	NA	150.832	FALSE
Myanmar	NA	2013	IGS-MNM-003	NA	South East Asia - West	Oceania-SEA	ASIA	TRUE	present	present	present	pfhrp2+/pfhrp3+	SRR5346207	NA	179.127	FALSE
Myanmar	NA	2013	IGS-MNM-004	NA	South East Asia - West	Oceania-SEA	ASIA	TRUE	present	present	present	pfhrp2+/pfhrp3+	SRR5361593	NA	156.941	FALSE
Myanmar	NA	2013	IGS-MNM-005	NA	South East Asia - West	Oceania-SEA	ASIA	TRUE	present	present	present	pfhrp2+/pfhrp3+	SRR5361594	NA	151.226	FALSE
Myanmar	NA	2013	IGS-MNM-006	NA	South East Asia - West	Oceania-SEA	ASIA	TRUE	present	present	present	pfhrp2+/pfhrp3+	SRR5346208	NA	145.419	FALSE
Myanmar	NA	2013	IGS-MNM-007	NA	South East Asia - West	Oceania-SEA	ASIA	TRUE	present	present	present	pfhrp2+/pfhrp3+	SRR5360493,SRR5360494	NA	118.902	FALSE
Myanmar	NA	2013	IGS-MNM-008	NA	South East Asia - West	Oceania-SEA	ASIA	TRUE	present	present	present	pfhrp2+/pfhrp3+	SRR5346209	NA	146.361	FALSE
Myanmar	NA	2013	IGS-MNM-009	NA	South East Asia - West	Oceania-SEA	ASIA	TRUE	present	present	present	pfhrp2+/pfhrp3+	SRR5346210	NA	148.624	FALSE
Myanmar	NA	2013	IGS-MNM-010	NA	South East Asia - West	Oceania-SEA	ASIA	TRUE	present	present	present	pfhrp2+/pfhrp3+	SRR5346211	NA	78.9118	FALSE
Myanmar	NA	2013	IGS-MNM-011	NA	South East Asia - West	Oceania-SEA	ASIA	TRUE	present	present	present	pfhrp2+/pfhrp3+	SRR5346212	NA	135.591	FALSE
Myanmar	NA	2013	IGS-MNM-012	NA	South East Asia - West	Oceania-SEA	ASIA	TRUE	present	present	present	pfhrp2+/pfhrp3+	SRR5346213	NA	138.607	FALSE
Myanmar	NA	2013	IGS-MNM-013	NA	South East Asia - West	Oceania-SEA	ASIA	TRUE	present	present	present	pfhrp2+/pfhrp3+	SRR5346216	NA	199.093	FALSE
Myanmar	NA	2013	IGS-MNM-014	NA	South East Asia - West	Oceania-SEA	ASIA	TRUE	present	present	present	pfhrp2+/pfhrp3+	SRR5346222	NA	191.322	FALSE
Myanmar	NA	2013	IGS-MNM-015	NA	South East Asia - West	Oceania-SEA	ASIA	TRUE	present	present	present	pfhrp2+/pfhrp3+	SRR5346214	NA	140.331	FALSE
Myanmar	NA	2013	IGS-MNM-016	NA	South East Asia - West	Oceania-SEA	ASIA	TRUE	present	present	present	pfhrp2+/pfhrp3+	SRR5360484,SRR5360485,SRR5360486	NA	269.354	FALSE
Myanmar	NA	2013	IGS-MNM-017	NA	South East Asia - West	Oceania-SEA	ASIA	TRUE	present	present	present	pfhrp2+/pfhrp3+	SRR5360516,SRR5360517,SRR5360518,SRR5360519	NA	215.804	FALSE
Myanmar	NA	2013	IGS-MNM-018	NA	South East Asia - West	Oceania-SEA	ASIA	TRUE	present	present	present	pfhrp2+/pfhrp3+	SRR5346220	NA	116.21	FALSE
Malawi	NA	2015	IGS-MWI-006sA	2015-09-01	South East Africa	East Africa	AFRICA	TRUE	present	present	present	pfhrp2+/pfhrp3+	SRR7348439,SRR7348440	NA	303.493	FALSE
Malawi	NA	2015	IGS-MWI-007sA	2015-08-01	South East Africa	East Africa	AFRICA	TRUE	present	present	present	pfhrp2+/pfhrp3+	SRR7450661,SRR7450662	NA	212.131	FALSE
Malawi	NA	2015	IGS-MWI-008sA	2015-07-01	South East Africa	East Africa	AFRICA	TRUE	present	present	present	pfhrp2+/pfhrp3+	SRR7450891	NA	168.404	FALSE
Malawi	NA	2015	IGS-MWI-009sA	2015-07-01	South East Africa	East Africa	AFRICA	TRUE	present	present	present	pfhrp2+/pfhrp3+	SRR7456390	NA	168.044	FALSE
Malawi	NA	2015	IGS-MWI-010sA	2015-06-01	South East Africa	East Africa	AFRICA	TRUE	present	present	present	pfhrp2+/pfhrp3+	SRR7456391,SRR7456392	NA	209.701	FALSE
Malawi	NA	2015	IGS-MWI-011sA	2015-08-01	South East Africa	East Africa	AFRICA	TRUE	present	present	present	pfhrp2+/pfhrp3+	SRR7456393,SRR7456394	NA	155.869	FALSE
Malawi	NA	2015	IGS-MWI-012sA	2015-05-01	South East Africa	East Africa	AFRICA	TRUE	present	present	present	pfhrp2+/pfhrp3+	SRR7456395	NA	185.919	FALSE
Malawi	NA	2015	IGS-MWI-013sA	2015-06-01	South East Africa	East Africa	AFRICA	TRUE	present	present	present	pfhrp2+/pfhrp3+	SRR7456396,SRR7456397,SRR7456398,SRR7456399	NA	284.076	FALSE
Malawi	NA	2015	IGS-MWI-014sA	2015-05-01	South East Africa	East Africa	AFRICA	TRUE	present	present	present	pfhrp2+/pfhrp3+	SRR7456400,SRR7456401,SRR7456402,SRR7456403	NA	185.678	FALSE
Malawi	NA	2015	IGS-MWI-015sA	2015-04-01	South East Africa	East Africa	AFRICA	TRUE	present	present	present	pfhrp2+/pfhrp3+	SRR7456404,SRR7456405	NA	203.621	FALSE
Malawi	NA	2015	IGS-MWI-016sA	2015-03-01	South East Africa	East Africa	AFRICA	TRUE	uncallable	uncallable	uncallable	uncallable	SRR7456406,SRR7456407,SRR7456408,SRR7456409	NA	408.039	TRUE
Malawi	NA	2015	IGS-MWI-017sA	2015-09-01	South East Africa	East Africa	AFRICA	TRUE	present	present	present	pfhrp2+/pfhrp3+	SRR7456410,SRR7456411	NA	220.234	FALSE
Malawi	NA	2016	IGS-MWI-018sA	2016-05-01	South East Africa	East Africa	AFRICA	TRUE	present	present	present	pfhrp2+/pfhrp3+	SRR7456412	NA	164.001	FALSE
Malawi	NA	2016	IGS-MWI-019sA	2016-01-01	South East Africa	East Africa	AFRICA	TRUE	present	present	present	pfhrp2+/pfhrp3+	SRR7456413,SRR7456414	NA	254.821	FALSE
Malawi	NA	2016	IGS-MWI-020sA	2016-01-01	South East Africa	East Africa	AFRICA	TRUE	present	present	present	pfhrp2+/pfhrp3+	SRR7456415	NA	173.346	FALSE
Malawi	NA	2016	IGS-MWI-021sA	2016-07-01	South East Africa	East Africa	AFRICA	TRUE	present	present	present	pfhrp2+/pfhrp3+	SRR7456416,SRR7456417	NA	227.44	FALSE
Malawi	NA	2015	IGS-MWI-022sA	2015-03-01	South East Africa	East Africa	AFRICA	TRUE	present	present	present	pfhrp2+/pfhrp3+	SRR7456418,SRR7456419	NA	211.829	FALSE
Malawi	NA	2016	IGS-MWI-023sA	2016-04-01	South East Africa	East Africa	AFRICA	TRUE	present	present	present	pfhrp2+/pfhrp3+	SRR7456420,SRR7456421	NA	273.489	FALSE
Malawi	NA	2014	IGS-MWI-024sA	2014-09-01	South East Africa	East Africa	AFRICA	TRUE	present	present	present	pfhrp2+/pfhrp3+	SRR7456422,SRR7456423	NA	200.449	FALSE
Malawi	NA	2014	IGS-MWI-025sA	2014-08-01	South East Africa	East Africa	AFRICA	TRUE	present	present	present	pfhrp2+/pfhrp3+	SRR7456424,SRR7456425,SRR7456426	NA	206.578	FALSE
Malawi	NA	2015	IGS-MWI-026sA	2015-07-01	South East Africa	East Africa	AFRICA	TRUE	present	present	present	pfhrp2+/pfhrp3+	SRR7456450,SRR7456451	NA	228.286	FALSE
Malawi	NA	2016	IGS-MWI-027sA	2016-04-01	South East Africa	East Africa	AFRICA	TRUE	present	present	present	pfhrp2+/pfhrp3+	SRR7456452,SRR7456453	NA	277.048	FALSE
Malawi	NA	2016	IGS-MWI-028sA	2016-05-01	South East Africa	East Africa	AFRICA	TRUE	present	present	present	pfhrp2+/pfhrp3+	SRR7456454,SRR7456455	NA	225.147	FALSE
Malawi	NA	2016	IGS-MWI-029sA	2016-05-01	South East Africa	East Africa	AFRICA	TRUE	present	present	present	pfhrp2+/pfhrp3+	SRR7456456,SRR7456457	NA	214.411	FALSE
Malawi	NA	2016	IGS-MWI-030sA	2016-08-01	South East Africa	East Africa	AFRICA	TRUE	present	present	present	pfhrp2+/pfhrp3+	SRR7456458,SRR7456459,SRR7456460	NA	233.134	FALSE
Malawi	NA	2016	IGS-MWI-031sA	2016-03-01	South East Africa	East Africa	AFRICA	TRUE	present	present	present	pfhrp2+/pfhrp3+	SRR7456461,SRR7456462	NA	189.693	FALSE
Malawi	NA	2016	IGS-MWI-032sA	2016-05-01	South East Africa	East Africa	AFRICA	TRUE	present	present	present	pfhrp2+/pfhrp3+	SRR7456463	NA	178.597	FALSE
Malawi	NA	2015	IGS-MWI-033sA	2015-02-01	South East Africa	East Africa	AFRICA	TRUE	uncallable	uncallable	uncallable	uncallable	SRR7456464	NA	1.51459	TRUE
Malawi	NA	2015	IGS-MWI-034sA	2015-02-01	South East Africa	East Africa	AFRICA	TRUE	present	present	present	pfhrp2+/pfhrp3+	SRR7456465,SRR7456466	NA	224.074	FALSE
Malawi	NA	2016	IGS-MWI-035sA	2016-08-01	South East Africa	East Africa	AFRICA	TRUE	present	present	present	pfhrp2+/pfhrp3+	SRR7456467	NA	650.598	FALSE
Malawi	NA	2016	IGS-MWI-036sA	2016-02-01	South East Africa	East Africa	AFRICA	TRUE	present	present	present	pfhrp2+/pfhrp3+	SRR7456468	NA	212.15	FALSE
Malawi	NA	2016	IGS-MWI-037sA	2016-08-01	South East Africa	East Africa	AFRICA	TRUE	present	present	present	pfhrp2+/pfhrp3+	SRR7456469,SRR7456470	NA	198.806	FALSE
Malawi	NA	2014	IGS-MWI-038sA	2014-09-01	South East Africa	East Africa	AFRICA	TRUE	present	present	present	pfhrp2+/pfhrp3+	SRR7456471,SRR7456472	NA	240.174	FALSE
Malawi	NA	2014	IGS-MWI-039sA	2014-10-01	South East Africa	East Africa	AFRICA	TRUE	present	present	present	pfhrp2+/pfhrp3+	SRR7456473,SRR7456474	NA	205.657	FALSE
Malawi	NA	2015	IGS-MWI-040sA	2015-07-01	South East Africa	East Africa	AFRICA	TRUE	present	present	present	pfhrp2+/pfhrp3+	SRR7456475,SRR7456476	NA	189.208	FALSE
Malawi	NA	2015	IGS-MWI-041sA	2015-10-01	South East Africa	East Africa	AFRICA	TRUE	present	present	present	pfhrp2+/pfhrp3+	SRR7456477	NA	235.32	FALSE
Malawi	NA	2016	IGS-MWI-042sA	2016-02-01	South East Africa	East Africa	AFRICA	TRUE	present	present	present	pfhrp2+/pfhrp3+	SRR7456478,SRR7456479	NA	223.679	FALSE
Malawi	NA	2015	IGS-MWI-043sA	2015-08-01	South East Africa	East Africa	AFRICA	TRUE	present	present	present	pfhrp2+/pfhrp3+	SRR7456512,SRR7456513	NA	238.302	FALSE
Malawi	NA	2015	IGS-MWI-044sA	2015-02-01	South East Africa	East Africa	AFRICA	TRUE	present	present	present	pfhrp2+/pfhrp3+	SRR7456514	NA	186.884	FALSE
Malawi	NA	2015	IGS-MWI-045sA	2015-01-01	South East Africa	East Africa	AFRICA	TRUE	present	present	present	pfhrp2+/pfhrp3+	SRR7456515,SRR7456516	NA	211.293	FALSE
Malawi	NA	2014	IGS-MWI-046sA	2014-09-01	South East Africa	East Africa	AFRICA	TRUE	uncallable	uncallable	uncallable	uncallable	SRR7456517	NA	1.4262	TRUE
Malawi	NA	2015	IGS-MWI-047sA	2015-01-01	South East Africa	East Africa	AFRICA	TRUE	present	present	present	pfhrp2+/pfhrp3+	SRR7456518	NA	187.079	FALSE
Malawi	NA	2015	IGS-MWI-048sA	2015-07-01	South East Africa	East Africa	AFRICA	TRUE	present	present	present	pfhrp2+/pfhrp3+	SRR7456519,SRR7456520	NA	213.086	FALSE
Malawi	NA	2015	IGS-MWI-049sA	2015-08-01	South East Africa	East Africa	AFRICA	TRUE	present	present	present	pfhrp2+/pfhrp3+	SRR7456521	NA	174.749	FALSE
Malawi	NA	2015	IGS-MWI-050sA	2015-09-01	South East Africa	East Africa	AFRICA	TRUE	present	present	present	pfhrp2+/pfhrp3+	SRR7456522,SRR7456523	NA	201.636	FALSE
Malawi	NA	2016	IGS-MWI-051sA	2016-03-01	South East Africa	East Africa	AFRICA	TRUE	present	present	present	pfhrp2+/pfhrp3+	SRR7456524,SRR7456525	NA	261.937	FALSE
Malawi	NA	2015	IGS-MWI-052sA	2015-05-01	South East Africa	East Africa	AFRICA	TRUE	present	present	present	pfhrp2+/pfhrp3+	SRR7456526,SRR7456527	NA	233.317	FALSE
Malawi	NA	2016	IGS-MWI-053sA	2016-08-01	South East Africa	East Africa	AFRICA	TRUE	present	present	present	pfhrp2+/pfhrp3+	SRR7456528	NA	163.759	FALSE
Malawi	NA	2015	IGS-MWI-054sA	2015-09-01	South East Africa	East Africa	AFRICA	TRUE	present	present	present	pfhrp2+/pfhrp3+	SRR7456529,SRR7456530	NA	170.874	FALSE
Malawi	NA	2015	IGS-MWI-055sA	2015-09-01	South East Africa	East Africa	AFRICA	TRUE	present	present	present	pfhrp2+/pfhrp3+	SRR7456531,SRR7456532	NA	205.942	FALSE
Malawi	NA	2015	IGS-MWI-056sA	2015-06-01	South East Africa	East Africa	AFRICA	TRUE	present	present	present	pfhrp2+/pfhrp3+	SRR7456629,SRR7456630,SRR7456631	NA	309.473	FALSE
Malawi	NA	2015	IGS-MWI-057sA	2015-08-01	South East Africa	East Africa	AFRICA	TRUE	present	present	present	pfhrp2+/pfhrp3+	SRR7456632,SRR7456633	NA	211.581	FALSE
Malawi	NA	2015	IGS-MWI-058sA	2015-11-01	South East Africa	East Africa	AFRICA	TRUE	uncallable	uncallable	uncallable	uncallable	SRR7456634	NA	0.72893	TRUE
Malawi	NA	2016	IGS-MWI-059sA	2016-07-01	South East Africa	East Africa	AFRICA	TRUE	present	present	present	pfhrp2+/pfhrp3+	SRR7456635,SRR7456636	NA	334.074	FALSE
Malawi	NA	2015	IGS-MWI-060sA	2015-08-01	South East Africa	East Africa	AFRICA	TRUE	present	present	present	pfhrp2+/pfhrp3+	SRR7456637,SRR7456638	NA	200.109	FALSE
Malawi	NA	2015	IGS-MWI-061sA	2015-05-01	South East Africa	East Africa	AFRICA	TRUE	present	present	present	pfhrp2+/pfhrp3+	SRR7456773,SRR7456774	NA	185.617	FALSE
Malawi	NA	2015	IGS-MWI-062sA	2015-09-01	South East Africa	East Africa	AFRICA	TRUE	present	present	present	pfhrp2+/pfhrp3+	SRR7456775,SRR7456777	NA	245.715	FALSE
Malawi	NA	2016	IGS-MWI-063sA	2016-09-01	South East Africa	East Africa	AFRICA	TRUE	present	present	present	pfhrp2+/pfhrp3+	SRR7456824,SRR7456825	NA	150.747	FALSE
Malawi	NA	2015	IGS-MWI-064sA	2015-07-01	South East Africa	East Africa	AFRICA	TRUE	present	present	present	pfhrp2+/pfhrp3+	SRR7456826,SRR7456827	NA	278.458	FALSE
Malawi	NA	2015	IGS-MWI-065sA	2015-09-01	South East Africa	East Africa	AFRICA	TRUE	uncallable	uncallable	uncallable	uncallable	SRR7456828	NA	155.565	TRUE
Malawi	NA	2015	IGS-MWI-066sA	2015-09-01	South East Africa	East Africa	AFRICA	TRUE	present	present	present	pfhrp2+/pfhrp3+	SRR7463306,SRR7463307	NA	205.216	FALSE
Malawi	NA	2015	IGS-MWI-067sA	2015-03-01	South East Africa	East Africa	AFRICA	TRUE	present	present	present	pfhrp2+/pfhrp3+	SRR7463308,SRR7463309	NA	185.769	FALSE
Malawi	NA	2015	IGS-MWI-068sA	2015-02-01	South East Africa	East Africa	AFRICA	TRUE	present	present	present	pfhrp2+/pfhrp3+	SRR7463909	NA	183.24	FALSE
Malawi	NA	2015	IGS-MWI-069sA	2015-04-01	South East Africa	East Africa	AFRICA	TRUE	present	present	present	pfhrp2+/pfhrp3+	SRR7463910,SRR7463911,SRR7463912	NA	221.644	FALSE
Malawi	NA	2015	IGS-MWI-070sA	2015-08-01	South East Africa	East Africa	AFRICA	TRUE	present	present	present	pfhrp2+/pfhrp3+	SRR7463913,SRR7463914,SRR7463915	NA	175.988	FALSE
Malawi	NA	2014	IGS-MWI-071sA	2014-10-01	South East Africa	East Africa	AFRICA	TRUE	present	present	present	pfhrp2+/pfhrp3+	SRR7463916,SRR7463917	NA	203.285	FALSE
Malawi	NA	2014	IGS-MWI-072sA	2014-11-01	South East Africa	East Africa	AFRICA	TRUE	present	present	present	pfhrp2+/pfhrp3+	SRR7463918	NA	170.086	FALSE
Malawi	NA	2015	IGS-MWI-073sA	2015-10-01	South East Africa	East Africa	AFRICA	TRUE	present	present	present	pfhrp2+/pfhrp3+	SRR7463919	NA	174.63	FALSE
Malawi	NA	2016	IGS-MWI-074sA	2016-09-01	South East Africa	East Africa	AFRICA	TRUE	present	present	present	pfhrp2+/pfhrp3+	SRR7463920,SRR7463921	NA	225.479	FALSE
Malawi	NA	2014	IGS-MWI-075sA	2014-10-01	South East Africa	East Africa	AFRICA	TRUE	present	present	present	pfhrp2+/pfhrp3+	SRR7463922,SRR7463923	NA	256.346	FALSE
Malawi	NA	2016	IGS-MWI-076sA	2016-04-01	South East Africa	East Africa	AFRICA	TRUE	present	present	present	pfhrp2+/pfhrp3+	SRR7463924,SRR7463925	NA	202.258	FALSE
Malawi	NA	2015	IGS-MWI-077sA	2015-02-01	South East Africa	East Africa	AFRICA	TRUE	uncallable	uncallable	uncallable	uncallable	SRR7463926	NA	1.03355	TRUE
Malawi	NA	2015	IGS-MWI-078sA	2015-04-01	South East Africa	East Africa	AFRICA	TRUE	present	present	present	pfhrp2+/pfhrp3+	SRR7463927,SRR7463928	NA	208.822	FALSE
Malawi	NA	2015	IGS-MWI-079sA	2015-10-01	South East Africa	East Africa	AFRICA	TRUE	present	present	present	pfhrp2+/pfhrp3+	SRR7463935,SRR7463936	NA	193.115	FALSE
Malawi	NA	2015	IGS-MWI-080sA	2015-07-01	South East Africa	East Africa	AFRICA	TRUE	present	present	present	pfhrp2+/pfhrp3+	SRR7463937,SRR7463938	NA	186.415	FALSE
Malawi	NA	2015	IGS-MWI-081sA	2015-09-01	South East Africa	East Africa	AFRICA	TRUE	present	present	present	pfhrp2+/pfhrp3+	SRR7463939,SRR7463940,SRR7463941,SRR7463942	NA	261.688	FALSE
Malawi	NA	2015	IGS-MWI-082sA	2015-04-01	South East Africa	East Africa	AFRICA	TRUE	present	present	present	pfhrp2+/pfhrp3+	SRR7463943,SRR7463944	NA	213.435	FALSE
Malawi	NA	2015	IGS-MWI-083sA	2015-09-01	South East Africa	East Africa	AFRICA	TRUE	present	present	present	pfhrp2+/pfhrp3+	SRR7463945,SRR7463946	NA	181.768	FALSE
Malawi	NA	2015	IGS-MWI-084sA	2015-10-01	South East Africa	East Africa	AFRICA	TRUE	present	present	present	pfhrp2+/pfhrp3+	SRR7464184,SRR7464185	NA	194.32	FALSE
Malawi	NA	2015	IGS-MWI-085sA	2015-06-01	South East Africa	East Africa	AFRICA	TRUE	present	present	present	pfhrp2+/pfhrp3+	SRR7464186,SRR7464187	NA	181.873	FALSE
Malawi	NA	2016	IGS-MWI-086sA	2016-05-01	South East Africa	East Africa	AFRICA	TRUE	present	present	present	pfhrp2+/pfhrp3+	SRR7464275,SRR7464276	NA	237.611	FALSE
Malawi	NA	2015	IGS-MWI-087sA	2015-08-01	South East Africa	East Africa	AFRICA	TRUE	present	present	present	pfhrp2+/pfhrp3+	SRR7464277,SRR7464278	NA	250.597	FALSE
Malawi	NA	2015	IGS-MWI-088sA	2015-07-01	South East Africa	East Africa	AFRICA	TRUE	present	present	present	pfhrp2+/pfhrp3+	SRR7464279,SRR7464280	NA	226.176	FALSE
Malawi	NA	2016	IGS-MWI-089sA	2016-02-01	South East Africa	East Africa	AFRICA	TRUE	present	present	present	pfhrp2+/pfhrp3+	SRR7464281,SRR7464282	NA	146.818	FALSE
Malawi	NA	2015	IGS-MWI-090sA	2015-07-01	South East Africa	East Africa	AFRICA	TRUE	present	present	present	pfhrp2+/pfhrp3+	SRR7464283,SRR7464284	NA	175.166	FALSE
Malawi	NA	2015	IGS-MWI-091sA	2015-10-01	South East Africa	East Africa	AFRICA	TRUE	present	present	present	pfhrp2+/pfhrp3+	SRR7464285,SRR7464286,SRR7464287	NA	199.394	FALSE
Malawi	NA	2016	IGS-MWI-092sA	2016-01-01	South East Africa	East Africa	AFRICA	TRUE	present	present	present	pfhrp2+/pfhrp3+	SRR7464288,SRR7464289,SRR7464290	NA	178.57	FALSE
Malawi	NA	2015	IGS-MWI-093sA	2015-12-01	South East Africa	East Africa	AFRICA	TRUE	present	present	present	pfhrp2+/pfhrp3+	SRR7464291,SRR7464292	NA	239.659	FALSE
Malawi	NA	2016	IGS-MWI-094sA	2016-07-01	South East Africa	East Africa	AFRICA	TRUE	present	present	present	pfhrp2+/pfhrp3+	SRR7464293,SRR7464294	NA	193.927	FALSE
Malawi	NA	2016	IGS-MWI-095sA	2016-04-01	South East Africa	East Africa	AFRICA	TRUE	present	present	present	pfhrp2+/pfhrp3+	SRR7464295	NA	170.529	FALSE
Malawi	NA	2016	IGS-MWI-096sA	2016-07-01	South East Africa	East Africa	AFRICA	TRUE	present	present	present	pfhrp2+/pfhrp3+	SRR7464296,SRR7464297	NA	278.503	FALSE
Malawi	NA	2015	IGS-MWI-097sA	2015-01-01	South East Africa	East Africa	AFRICA	TRUE	present	present	present	pfhrp2+/pfhrp3+	SRR7464298,SRR7464299	NA	235.695	FALSE
Malawi	NA	2015	IGS-MWI-098sA	2015-05-01	South East Africa	East Africa	AFRICA	TRUE	present	present	present	pfhrp2+/pfhrp3+	SRR7464300	NA	107.893	FALSE
Malawi	NA	2016	IGS-MWI-099sA	2016-02-01	South East Africa	East Africa	AFRICA	TRUE	present	present	present	pfhrp2+/pfhrp3+	SRR7464301	NA	106.934	FALSE
Malawi	NA	2015	IGS-MWI-100sA	2015-01-01	South East Africa	East Africa	AFRICA	TRUE	present	present	present	pfhrp2+/pfhrp3+	SRR7464302	NA	204.456	FALSE
Malawi	NA	2015	IGS-MWI-101sA	2015-04-01	South East Africa	East Africa	AFRICA	TRUE	present	present	present	pfhrp2+/pfhrp3+	SRR7464339,SRR7464340	NA	115.213	FALSE
Malawi	NA	2015	IGS-MWI-102sA	2015-01-01	South East Africa	East Africa	AFRICA	TRUE	present	present	present	pfhrp2+/pfhrp3+	SRR7464341	NA	151.375	FALSE
Malawi	NA	2015	IGS-MWI-103sA	2015-03-01	South East Africa	East Africa	AFRICA	TRUE	present	present	present	pfhrp2+/pfhrp3+	SRR7464342	NA	196.711	FALSE
Malawi	NA	2015	IGS-MWI-104sA	2015-03-01	South East Africa	East Africa	AFRICA	TRUE	present	present	present	pfhrp2+/pfhrp3+	SRR7464361	NA	70.3242	FALSE
Malawi	NA	2015	IGS-MWI-105sA	2015-09-01	South East Africa	East Africa	AFRICA	TRUE	present	present	present	pfhrp2+/pfhrp3+	SRR7464362	NA	122.919	FALSE
Malawi	NA	2015	IGS-MWI-106sA	2015-03-01	South East Africa	East Africa	AFRICA	TRUE	present	present	present	pfhrp2+/pfhrp3+	SRR7464363	NA	180.58	FALSE
Malawi	NA	2015	IGS-MWI-107sA	2015-04-01	South East Africa	East Africa	AFRICA	TRUE	present	present	present	pfhrp2+/pfhrp3+	SRR7464364	NA	185.745	FALSE
Malawi	NA	2015	IGS-MWI-108sA	2015-03-01	South East Africa	East Africa	AFRICA	TRUE	present	present	present	pfhrp2+/pfhrp3+	SRR7464402	NA	146.273	FALSE
Malawi	NA	2015	IGS-MWI-109sA	2015-09-01	South East Africa	East Africa	AFRICA	TRUE	present	present	present	pfhrp2+/pfhrp3+	SRR7464403	NA	147.424	FALSE
Malawi	NA	2015	IGS-MWI-110sA	2015-10-01	South East Africa	East Africa	AFRICA	TRUE	present	present	present	pfhrp2+/pfhrp3+	SRR7464404	NA	143.461	FALSE
Malawi	NA	2015	IGS-MWI-111sA	2015-03-01	South East Africa	East Africa	AFRICA	TRUE	present	present	present	pfhrp2+/pfhrp3+	SRR7464405	NA	106.921	FALSE
Malawi	NA	2015	IGS-MWI-112sA	2015-06-01	South East Africa	East Africa	AFRICA	TRUE	present	present	present	pfhrp2+/pfhrp3+	SRR7464406	NA	167.077	FALSE
Malawi	NA	2008	IGS-MWI-224sA	NA	South East Africa	East Africa	AFRICA	TRUE	present	present	present	pfhrp2+/pfhrp3+	SRR7465151,SRR7465152	NA	171.559	FALSE
Malawi	NA	2008	IGS-MWI-225sA	NA	South East Africa	East Africa	AFRICA	TRUE	present	present	present	pfhrp2+/pfhrp3+	SRR7465153,SRR7465154	NA	182.378	FALSE
Malawi	NA	2008	IGS-MWI-226sA	NA	South East Africa	East Africa	AFRICA	TRUE	present	present	present	pfhrp2+/pfhrp3+	SRR7465155	NA	144.263	FALSE
Malawi	NA	2008	IGS-MWI-227sA	NA	South East Africa	East Africa	AFRICA	TRUE	present	present	present	pfhrp2+/pfhrp3+	SRR7465156,SRR7465157	NA	212.653	FALSE
Malawi	NA	2008	IGS-MWI-228sA	NA	South East Africa	East Africa	AFRICA	TRUE	present	present	present	pfhrp2+/pfhrp3+	SRR7465158,SRR7465159	NA	192.426	FALSE
Malawi	NA	2008	IGS-MWI-229sA	NA	South East Africa	East Africa	AFRICA	TRUE	present	present	present	pfhrp2+/pfhrp3+	SRR7465160,SRR7465161,SRR7465162	NA	141.267	FALSE
Malawi	NA	2008	IGS-MWI-230sA	NA	South East Africa	East Africa	AFRICA	TRUE	present	present	present	pfhrp2+/pfhrp3+	SRR7465375,SRR7465376,SRR7465377	NA	183.102	FALSE
Malawi	NA	2008	IGS-MWI-231sA	NA	South East Africa	East Africa	AFRICA	TRUE	present	present	present	pfhrp2+/pfhrp3+	SRR7465378,SRR7465379	NA	172.069	FALSE
Malawi	NA	2008	IGS-MWI-232sA	NA	South East Africa	East Africa	AFRICA	TRUE	present	present	present	pfhrp2+/pfhrp3+	SRR7465380,SRR7465381,SRR7465382,SRR7465383,SRR7465384	NA	167.874	FALSE
Malawi	NA	2008	IGS-MWI-233sA	NA	South East Africa	East Africa	AFRICA	TRUE	present	present	present	pfhrp2+/pfhrp3+	SRR7465385,SRR7465386	NA	164.368	FALSE
Malawi	NA	2008	IGS-MWI-234sA	NA	South East Africa	East Africa	AFRICA	TRUE	present	present	present	pfhrp2+/pfhrp3+	SRR7465387,SRR7465388	NA	157.434	FALSE
Malawi	NA	2008	IGS-MWI-235sA	NA	South East Africa	East Africa	AFRICA	TRUE	present	present	present	pfhrp2+/pfhrp3+	SRR7465389,SRR7465390,SRR7465391	NA	185.324	FALSE
[truncated: 17,316 more rows]
