# Supplementary material for: Interchromosomal segmental duplication drives translocation and loss of P. falciparum histidine-rich protein 3
Source: eLife. 2024 Oct 7;13:RP93534. doi: 10.7554/eLife.93534 (PMC11458181; doi:10.7554/eLife.93534)
Supplement: Supplementary file 2. — This table contains information on the non-paralogous windows used for analyzing the regions of interest on chromosomes 5, 7, 8, 11, and 13. Plasmodium falciparum samples. Information includes the window’s chromosome name in 3D7, starting base position, ending base position, length, which strand the window is in respect to (positive or negative DNA strand), and description of the window region’s functionality. [file elife-93534-supp2.xlsx]

## Sheet: Table S2 Non-Paralogous windows
Supplementary File 2. Core Genome Windows. This table contains information on the non-paralogous windows used for analyzing the regions of interest on chromosomes 5, 7, 8, 11, and 13. Plasmodium falciparum samples. Information includes the window’s chromosome name in 3D7, starting base position, ending base position, length, which strand the window is in respect to (positive or negative DNA stran…
Chromosome=Window's chromosome name in 3D7 Start Position=Window's starting base position (0-based) End Position=Window's ending base position (0-based) Chromosome: Start-End Position=Window's chromosome name, starting, and ending base positions Window Length: Window's length (=End Position - Start Position) Strand (+/-): Positive or negative DNA strand that window is in respect to Functional Ann…
Chromosome	Start Position	End Position	Chromosome: Start-End Position	Window Length	Strand (+/-)	Functional Annotation
Pf3D7_05_v3	929384	929984	Pf3D7_05_v3-929384-929984	600	+	[ID=PF3D7_0522400;description=conserved Plasmodium protein, unknown function;]
Pf3D7_05_v3	930125	931175	Pf3D7_05_v3-930125-931175	1050	+	[ID=PF3D7_0522400;description=conserved Plasmodium protein, unknown function;]
Pf3D7_05_v3	931751	933001	Pf3D7_05_v3-931751-933001	1250	+	[ID=PF3D7_0522400;description=conserved Plasmodium protein, unknown function;]
Pf3D7_05_v3	933100	936400	Pf3D7_05_v3-933100-936400	3300	+	[ID=PF3D7_0522400;description=conserved Plasmodium protein, unknown function;]
Pf3D7_05_v3	936620	936870	Pf3D7_05_v3-936620-936870	250	+	NA
Pf3D7_05_v3	937044	937444	Pf3D7_05_v3-937044-937444	400	+	[ID=PF3D7_0522500;description=50S ribosomal protein L17, apicoplast, putative;]
Pf3D7_05_v3	937819	938069	Pf3D7_05_v3-937819-938069	250	+	[ID=PF3D7_0522500;description=50S ribosomal protein L17, apicoplast, putative;]
Pf3D7_05_v3	938571	938871	Pf3D7_05_v3-938571-938871	300	+	NA
Pf3D7_05_v3	939537	939937	Pf3D7_05_v3-939537-939937	400	+	NA
Pf3D7_05_v3	940250	941700	Pf3D7_05_v3-940250-941700	1450	+	[ID=PF3D7_0522600;description=inner membrane complex protein;]
Pf3D7_05_v3	942650	943000	Pf3D7_05_v3-942650-943000	350	+	[ID=PF3D7_0522700;description=iron-sulfur assembly protein;]
Pf3D7_05_v3	943683	943933	Pf3D7_05_v3-943683-943933	250	+	[ID=PF3D7_0522700;description=iron-sulfur assembly protein;]
Pf3D7_05_v3	944389	944589	Pf3D7_05_v3-944389-944589	200	+	[ID=PF3D7_0522800;description=pre-mRNA-splicing factor BUD31, putative;]
Pf3D7_05_v3	944684	944984	Pf3D7_05_v3-944684-944984	300	+	[ID=PF3D7_0522800;description=pre-mRNA-splicing factor BUD31, putative;]
Pf3D7_05_v3	945426	945876	Pf3D7_05_v3-945426-945876	450	+	NA
Pf3D7_05_v3	945982	946282	Pf3D7_05_v3-945982-946282	300	+	NA
Pf3D7_05_v3	947060	947460	Pf3D7_05_v3-947060-947460	400	+	NA
Pf3D7_05_v3	948639	949389	Pf3D7_05_v3-948639-949389	750	+	[ID=PF3D7_0522900;description=zinc finger protein, putative;]
Pf3D7_05_v3	949560	951510	Pf3D7_05_v3-949560-951510	1950	+	[ID=PF3D7_0522900;description=zinc finger protein, putative;]
Pf3D7_05_v3	951917	952217	Pf3D7_05_v3-951917-952217	300	+	[ID=PF3D7_0522900;description=zinc finger protein, putative;]
Pf3D7_05_v3	952324	952874	Pf3D7_05_v3-952324-952874	550	+	[ID=PF3D7_0522900;description=zinc finger protein, putative;]
Pf3D7_05_v3	952995	953595	Pf3D7_05_v3-952995-953595	600	+	[ID=PF3D7_0522900;description=zinc finger protein, putative;]
Pf3D7_05_v3	954002	954452	Pf3D7_05_v3-954002-954452	450	+	NA
Pf3D7_05_v3	954660	955410	Pf3D7_05_v3-954660-955410	750	+	NA
Pf3D7_05_v3	957775	959675	Pf3D7_05_v3-957775-959675	1900	+	[ID=PF3D7_0523000;description=multidrug resistance protein 1;]
Pf3D7_05_v3	959904	962154	Pf3D7_05_v3-959904-962154	2250	+	[ID=PF3D7_0523000;description=multidrug resistance protein 1;]
Pf3D7_05_v3	962987	964437	Pf3D7_05_v3-962987-964437	1450	+	[ID=PF3D7_0523100;description=mitochondrial-processing peptidase subunit alpha, putative;]
Pf3D7_05_v3	964667	965067	Pf3D7_05_v3-964667-965067	400	+	[ID=PF3D7_0523100;description=mitochondrial-processing peptidase subunit alpha, putative;]
Pf3D7_05_v3	965575	965775	Pf3D7_05_v3-965575-965775	200	+	NA
Pf3D7_05_v3	966013	968013	Pf3D7_05_v3-966013-968013	2000	+	[ID=PF3D7_0523200;description=heptatricopeptide repeat-containing protein, putative;]
Pf3D7_05_v3	968063	969063	Pf3D7_05_v3-968063-969063	1000	+	[ID=PF3D7_0523200;description=heptatricopeptide repeat-containing protein, putative;]
Pf3D7_05_v3	969548	969748	Pf3D7_05_v3-969548-969748	200	+	[ID=PF3D7_0523200;description=heptatricopeptide repeat-containing protein, putative;]
Pf3D7_05_v3	970272	970722	Pf3D7_05_v3-970272-970722	450	+	[ID=PF3D7_0523300;description=cytochrome c oxidase subunit ApiCOX18, putative;]
Pf3D7_05_v3	970836	971236	Pf3D7_05_v3-970836-971236	400	+	[ID=PF3D7_0523300;description=cytochrome c oxidase subunit ApiCOX18, putative;]
Pf3D7_05_v3	971316	971616	Pf3D7_05_v3-971316-971616	300	+	NA
Pf3D7_05_v3	971717	972267	Pf3D7_05_v3-971717-972267	550	+	NA
Pf3D7_05_v3	973672	973872	Pf3D7_05_v3-973672-973872	200	+	[ID=PF3D7_0523400;description=DnaJ protein, putative;]
Pf3D7_05_v3	974141	975641	Pf3D7_05_v3-974141-975641	1500	+	[ID=PF3D7_0523400;description=DnaJ protein, putative;]
Pf3D7_05_v3	977117	977367	Pf3D7_05_v3-977117-977367	250	+	[ID=PF3D7_0523500;description=dynein light chain Tctex-type, putative;]
Pf3D7_05_v3	977796	978046	Pf3D7_05_v3-977796-978046	250	+	[ID=PF3D7_0523500;description=dynein light chain Tctex-type, putative;]
Pf3D7_05_v3	978233	978483	Pf3D7_05_v3-978233-978483	250	+	NA
Pf3D7_05_v3	978556	978856	Pf3D7_05_v3-978556-978856	300	+	[ID=PF3D7_0523600;description=conserved protein, unknown function;]
Pf3D7_05_v3	978929	979129	Pf3D7_05_v3-978929-979129	200	+	[ID=PF3D7_0523600;description=conserved protein, unknown function;]
Pf3D7_05_v3	979231	979431	Pf3D7_05_v3-979231-979431	200	+	[ID=PF3D7_0523600;description=conserved protein, unknown function;]
Pf3D7_05_v3	979677	979977	Pf3D7_05_v3-979677-979977	300	+	[ID=PF3D7_0523600;description=conserved protein, unknown function;]
Pf3D7_05_v3	980741	983741	Pf3D7_05_v3-980741-983741	3000	+	[ID=PF3D7_0523700;description=conserved Plasmodium membrane protein, unknown function;]
Pf3D7_05_v3	983874	984924	Pf3D7_05_v3-983874-984924	1050	+	[ID=PF3D7_0523700;description=conserved Plasmodium membrane protein, unknown function;]
Pf3D7_05_v3	986087	986287	Pf3D7_05_v3-986087-986287	200	+	NA
Pf3D7_05_v3	986891	987141	Pf3D7_05_v3-986891-987141	250	+	NA
Pf3D7_05_v3	987375	987575	Pf3D7_05_v3-987375-987575	200	+	NA
Pf3D7_05_v3	988224	988424	Pf3D7_05_v3-988224-988424	200	+	NA
Pf3D7_05_v3	988547	988747	Pf3D7_05_v3-988547-988747	200	+	NA
Pf3D7_05_v3	1239308	1240258	Pf3D7_05_v3-1239308-1240258	950	+	[ID=PF3D7_0530400;description=conserved Plasmodium protein, unknown function;]
Pf3D7_05_v3	1240361	1241061	Pf3D7_05_v3-1240361-1241061	700	+	[ID=PF3D7_0530400;description=conserved Plasmodium protein, unknown function;]
Pf3D7_05_v3	1241196	1241746	Pf3D7_05_v3-1241196-1241746	550	+	[ID=PF3D7_0530400;description=conserved Plasmodium protein, unknown function;]
Pf3D7_05_v3	1242179	1242729	Pf3D7_05_v3-1242179-1242729	550	+	[ID=PF3D7_0530400;description=conserved Plasmodium protein, unknown function;]
Pf3D7_05_v3	1243060	1243960	Pf3D7_05_v3-1243060-1243960	900	+	[ID=PF3D7_0530400;description=conserved Plasmodium protein, unknown function;]
Pf3D7_05_v3	1244687	1246987	Pf3D7_05_v3-1244687-1246987	2300	+	[ID=PF3D7_0530500;description=conserved Plasmodium membrane protein, unknown function;]
Pf3D7_05_v3	1247264	1247814	Pf3D7_05_v3-1247264-1247814	550	+	[ID=PF3D7_0530500;description=conserved Plasmodium membrane protein, unknown function;]
Pf3D7_05_v3	1247899	1248099	Pf3D7_05_v3-1247899-1248099	200	+	[ID=PF3D7_0530500;description=conserved Plasmodium membrane protein, unknown function;]
Pf3D7_05_v3	1248769	1249269	Pf3D7_05_v3-1248769-1249269	500	+	[ID=PF3D7_0530600;description=XAP-5 DNA binding protein, putative;]
Pf3D7_05_v3	1249604	1249804	Pf3D7_05_v3-1249604-1249804	200	+	[ID=PF3D7_0530600;description=XAP-5 DNA binding protein, putative;]
Pf3D7_05_v3	1250663	1251463	Pf3D7_05_v3-1250663-1251463	800	+	[ID=PF3D7_0530700;description=conserved Plasmodium protein, unknown function;]
Pf3D7_05_v3	1251630	1252080	Pf3D7_05_v3-1251630-1252080	450	+	[ID=PF3D7_0530700;description=conserved Plasmodium protein, unknown function;]
Pf3D7_05_v3	1252296	1252946	Pf3D7_05_v3-1252296-1252946	650	+	[ID=PF3D7_0530700;description=conserved Plasmodium protein, unknown function;]
Pf3D7_05_v3	1253154	1254154	Pf3D7_05_v3-1253154-1254154	1000	+	[ID=PF3D7_0530700;description=conserved Plasmodium protein, unknown function;]
Pf3D7_05_v3	1253154	1254169	Pf3D7_05_v3-1253154-1254169	1015	+	[ID=PF3D7_0530700;description=conserved Plasmodium protein, unknown function;]
Pf3D7_05_v3	1254229	1254579	Pf3D7_05_v3-1254229-1254579	350	+	[ID=PF3D7_0530750;description=dolichol-phosphate mannosyltransferase subunit 3, putative;]
Pf3D7_05_v3	1254229	1254581	Pf3D7_05_v3-1254229-1254581	352	+	[ID=PF3D7_0530750;description=dolichol-phosphate mannosyltransferase subunit 3, putative;]
Pf3D7_05_v3	1254646	1254808	Pf3D7_05_v3-1254646-1254808	162	+	[ID=PF3D7_0530750;description=dolichol-phosphate mannosyltransferase subunit 3, putative;]
Pf3D7_05_v3	1254902	1255102	Pf3D7_05_v3-1254902-1255102	200	+	NA
Pf3D7_05_v3	1254902	1255108	Pf3D7_05_v3-1254902-1255108	206	+	NA
Pf3D7_05_v3	1255168	1255381	Pf3D7_05_v3-1255168-1255381	213	+	[ID=PF3D7_0530800;description=CPW-WPC family protein;]
Pf3D7_05_v3	1255569	1255769	Pf3D7_05_v3-1255569-1255769	200	+	[ID=PF3D7_0530800;description=CPW-WPC family protein;]
Pf3D7_05_v3	1255569	1255779	Pf3D7_05_v3-1255569-1255779	210	+	[ID=PF3D7_0530800;description=CPW-WPC family protein;]
Pf3D7_05_v3	1255854	1256001	Pf3D7_05_v3-1255854-1256001	147	+	[ID=PF3D7_0530800;description=CPW-WPC family protein;]
Pf3D7_05_v3	1256054	1256454	Pf3D7_05_v3-1256054-1256454	400	+	[ID=PF3D7_0530800;description=CPW-WPC family protein;]
Pf3D7_05_v3	1256054	1256472	Pf3D7_05_v3-1256054-1256472	418	+	[ID=PF3D7_0530800;description=CPW-WPC family protein;]
Pf3D7_05_v3	1256725	1257075	Pf3D7_05_v3-1256725-1257075	350	+	[ID=PF3D7_0530800;description=CPW-WPC family protein;]
Pf3D7_05_v3	1256725	1257119	Pf3D7_05_v3-1256725-1257119	394	+	[ID=PF3D7_0530800;description=CPW-WPC family protein;]
Pf3D7_05_v3	1257356	1257551	Pf3D7_05_v3-1257356-1257551	195	+	NA
Pf3D7_05_v3	1257706	1260256	Pf3D7_05_v3-1257706-1260256	2550	+	[ID=PF3D7_0530900;description=formin 1;]
Pf3D7_05_v3	1257706	1260293	Pf3D7_05_v3-1257706-1260293	2587	+	[ID=PF3D7_0530900;description=formin 1;]
Pf3D7_05_v3	1260401	1262101	Pf3D7_05_v3-1260401-1262101	1700	+	[ID=PF3D7_0530900;description=formin 1;]
Pf3D7_05_v3	1260401	1262132	Pf3D7_05_v3-1260401-1262132	1731	+	[ID=PF3D7_0530900;description=formin 1;]
Pf3D7_05_v3	1262231	1262781	Pf3D7_05_v3-1262231-1262781	550	+	[ID=PF3D7_0530900;description=formin 1;]
Pf3D7_05_v3	1262231	1262796	Pf3D7_05_v3-1262231-1262796	565	+	[ID=PF3D7_0530900;description=formin 1;]
Pf3D7_05_v3	1262951	1264251	Pf3D7_05_v3-1262951-1264251	1300	+	[ID=PF3D7_0530900;description=formin 1;]
Pf3D7_05_v3	1262951	1264292	Pf3D7_05_v3-1262951-1264292	1341	+	[ID=PF3D7_0530900;description=formin 1;]
Pf3D7_05_v3	1264371	1265071	Pf3D7_05_v3-1264371-1265071	700	+	[ID=PF3D7_0530900;description=formin 1;]
Pf3D7_05_v3	1264371	1265090	Pf3D7_05_v3-1264371-1265090	719	+	[ID=PF3D7_0530900;description=formin 1;]
Pf3D7_05_v3	1265173	1265773	Pf3D7_05_v3-1265173-1265773	600	+	[ID=PF3D7_0530900;description=formin 1;]
Pf3D7_05_v3	1265173	1265779	Pf3D7_05_v3-1265173-1265779	606	+	[ID=PF3D7_0530900;description=formin 1;]
Pf3D7_05_v3	1266147	1266392	Pf3D7_05_v3-1266147-1266392	245	+	NA
Pf3D7_05_v3	1266980	1267230	Pf3D7_05_v3-1266980-1267230	250	+	NA
Pf3D7_05_v3	1266980	1267230	Pf3D7_05_v3-1266980-1267230	250	+	NA
Pf3D7_05_v3	1267393	1267643	Pf3D7_05_v3-1267393-1267643	250	+	[ID=PF3D7_0531000;description=SURF1 domain-containing protein, putative;]
Pf3D7_05_v3	1267393	1267664	Pf3D7_05_v3-1267393-1267664	271	+	[ID=PF3D7_0531000;description=SURF1 domain-containing protein, putative;]
Pf3D7_05_v3	1267724	1268024	Pf3D7_05_v3-1267724-1268024	300	+	[ID=PF3D7_0531000;description=SURF1 domain-containing protein, putative;]
Pf3D7_05_v3	1267724	1268115	Pf3D7_05_v3-1267724-1268115	391	+	[ID=PF3D7_0531000;description=SURF1 domain-containing protein, putative;]
Pf3D7_05_v3	1268167	1269567	Pf3D7_05_v3-1268167-1269567	1400	+	[ID=PF3D7_0531000;description=SURF1 domain-containing protein, putative;]
Pf3D7_05_v3	1268167	1269583	Pf3D7_05_v3-1268167-1269583	1416	+	[ID=PF3D7_0531000;description=SURF1 domain-containing protein, putative;]
Pf3D7_05_v3	1269839	1270039	Pf3D7_05_v3-1269839-1270039	200	+	NA
Pf3D7_05_v3	1269839	1270061	Pf3D7_05_v3-1269839-1270061	222	+	NA
Pf3D7_05_v3	1270121	1270285	Pf3D7_05_v3-1270121-1270285	164	+	NA
Pf3D7_05_v3	1270347	1271097	Pf3D7_05_v3-1270347-1271097	750	+	[ID=PF3D7_0531100;description=conserved Plasmodium protein, unknown function;]
Pf3D7_05_v3	1270347	1271561	Pf3D7_05_v3-1270347-1271561	1214	+	[ID=PF3D7_0531100;description=conserved Plasmodium protein, unknown function;]
Pf3D7_05_v3	1271197	1271547	Pf3D7_05_v3-1271197-1271547	350	+	[ID=PF3D7_0531100;description=conserved Plasmodium protein, unknown function;]
Pf3D7_05_v3	1271623	1273423	Pf3D7_05_v3-1271623-1273423	1800	+	[ID=PF3D7_0531100;description=conserved Plasmodium protein, unknown function;]
Pf3D7_05_v3	1271623	1273451	Pf3D7_05_v3-1271623-1273451	1828	+	[ID=PF3D7_0531100;description=conserved Plasmodium protein, unknown function;]
Pf3D7_05_v3	1273526	1275226	Pf3D7_05_v3-1273526-1275226	1700	+	[ID=PF3D7_0531100;description=conserved Plasmodium protein, unknown function;]
Pf3D7_05_v3	1273526	1275248	Pf3D7_05_v3-1273526-1275248	1722	+	[ID=PF3D7_0531100;description=conserved Plasmodium protein, unknown function;]
Pf3D7_05_v3	1275302	1275552	Pf3D7_05_v3-1275302-1275552	250	+	[ID=PF3D7_0531100;description=conserved Plasmodium protein, unknown function;]
Pf3D7_05_v3	1275302	1275594	Pf3D7_05_v3-1275302-1275594	292	+	[ID=PF3D7_0531100;description=conserved Plasmodium protein, unknown function;]
Pf3D7_05_v3	1275663	1275815	Pf3D7_05_v3-1275663-1275815	152	+	[ID=PF3D7_0531100;description=conserved Plasmodium protein, unknown function;]
Pf3D7_05_v3	1276023	1276204	Pf3D7_05_v3-1276023-1276204	181	+	[ID=PF3D7_0531100;description=conserved Plasmodium protein, unknown function;]
Pf3D7_05_v3	1276272	1276522	Pf3D7_05_v3-1276272-1276522	250	+	[ID=PF3D7_0531100;description=conserved Plasmodium protein, unknown function;]
Pf3D7_05_v3	1276272	1276561	Pf3D7_05_v3-1276272-1276561	289	+	[ID=PF3D7_0531100;description=conserved Plasmodium protein, unknown function;]
Pf3D7_05_v3	1276705	1276852	Pf3D7_05_v3-1276705-1276852	147	+	[ID=PF3D7_0531100;description=conserved Plasmodium protein, unknown function;]
Pf3D7_05_v3	1276958	1277258	Pf3D7_05_v3-1276958-1277258	300	+	[ID=PF3D7_0531100;description=conserved Plasmodium protein, unknown function;]
Pf3D7_05_v3	1276958	1277433	Pf3D7_05_v3-1276958-1277433	475	+	[ID=PF3D7_0531100;description=conserved Plasmodium protein, unknown function;]
Pf3D7_05_v3	1277579	1278479	Pf3D7_05_v3-1277579-1278479	900	+	[ID=PF3D7_0531100;description=conserved Plasmodium protein, unknown function;]
Pf3D7_05_v3	1277579	1278516	Pf3D7_05_v3-1277579-1278516	937	+	[ID=PF3D7_0531100;description=conserved Plasmodium protein, unknown function;]
Pf3D7_05_v3	1279281	1279411	Pf3D7_05_v3-1279281-1279411	130	+	NA
Pf3D7_05_v3	1279474	1279616	Pf3D7_05_v3-1279474-1279616	142	+	NA
Pf3D7_05_v3	1279671	1279861	Pf3D7_05_v3-1279671-1279861	190	+	NA
Pf3D7_05_v3	1279921	1280571	Pf3D7_05_v3-1279921-1280571	650	+	[ID=PF3D7_0531200;description=ribosomal protein S16, mitochondrial, putative;]
Pf3D7_05_v3	1279921	1280609	Pf3D7_05_v3-1279921-1280609	688	+	[ID=PF3D7_0531200;description=ribosomal protein S16, mitochondrial, putative;]
Pf3D7_05_v3	1280723	1280835	Pf3D7_05_v3-1280723-1280835	112	+	NA
Pf3D7_05_v3	1281042	1281180	Pf3D7_05_v3-1281042-1281180	138	+	NA
Pf3D7_05_v3	1281242	1281367	Pf3D7_05_v3-1281242-1281367	125	+	[ID=PF3D7_0531300;description=conserved Plasmodium protein, unknown function;]
Pf3D7_05_v3	1281427	1282277	Pf3D7_05_v3-1281427-1282277	850	+	[ID=PF3D7_0531300;description=conserved Plasmodium protein, unknown function;]
Pf3D7_05_v3	1281427	1282277	Pf3D7_05_v3-1281427-1282277	850	+	[ID=PF3D7_0531300;description=conserved Plasmodium protein, unknown function;]
Pf3D7_05_v3	1282683	1284083	Pf3D7_05_v3-1282683-1284083	1400	+	[ID=PF3D7_0531400;description=conserved Plasmodium protein, unknown function;]
Pf3D7_05_v3	1282683	1284117	Pf3D7_05_v3-1282683-1284117	1434	+	[ID=PF3D7_0531400;description=conserved Plasmodium protein, unknown function;]
Pf3D7_05_v3	1284193	1284593	Pf3D7_05_v3-1284193-1284593	400	+	[ID=PF3D7_0531400;description=conserved Plasmodium protein, unknown function;]
Pf3D7_05_v3	1284193	1284601	Pf3D7_05_v3-1284193-1284601	408	+	[ID=PF3D7_0531400;description=conserved Plasmodium protein, unknown function;]
Pf3D7_05_v3	1284657	1286007	Pf3D7_05_v3-1284657-1286007	1350	+	[ID=PF3D7_0531400;description=conserved Plasmodium protein, unknown function;]
Pf3D7_05_v3	1284657	1286022	Pf3D7_05_v3-1284657-1286022	1365	+	[ID=PF3D7_0531400;description=conserved Plasmodium protein, unknown function;]
Pf3D7_05_v3	1286723	1286853	Pf3D7_05_v3-1286723-1286853	130	+	NA
Pf3D7_05_v3	1286914	1287164	Pf3D7_05_v3-1286914-1287164	250	+	NA
Pf3D7_05_v3	1286914	1287171	Pf3D7_05_v3-1286914-1287171	257	+	NA
Pf3D7_05_v3	1287388	1287529	Pf3D7_05_v3-1287388-1287529	141	+	NA
Pf3D7_05_v3	1288134	1288434	Pf3D7_05_v3-1288134-1288434	300	+	NA
Pf3D7_05_v3	1288134	1288458	Pf3D7_05_v3-1288134-1288458	324	+	NA
Pf3D7_05_v3	1288858	1289158	Pf3D7_05_v3-1288858-1289158	300	+	[ID=PF3D7_0531500;description=unspecified product;]
Pf3D7_05_v3	1288858	1289258	Pf3D7_05_v3-1288858-1289258	400	+	[ID=PF3D7_0531500;description=unspecified product;]
Pf3D7_05_v3	1289171	1289611	Pf3D7_05_v3-1289171-1289611-for	440	+	[ID=PF3D7_0531500;description=unspecified product;],[ID=PF3D7_0531600;description=18S ribosomal RNA;]
Pf3D7_05_v3	1289681	1290191	Pf3D7_05_v3-1289681-1290191-for	510	+	[ID=PF3D7_0531600;description=18S ribosomal RNA;]
Pf3D7_05_v3	1290211	1290931	Pf3D7_05_v3-1290211-1290931-for	720	+	[ID=PF3D7_0531600;description=18S ribosomal RNA;]
Pf3D7_05_v3	1291061	1291206	Pf3D7_05_v3-1291061-1291206-for	145	+	[ID=PF3D7_0531600;description=18S ribosomal RNA;]
Pf3D7_05_v3	1291211	1292591	Pf3D7_05_v3-1291211-1292591-for	1380	+	[ID=PF3D7_0531600;description=18S ribosomal RNA;],[ID=PF3D7_0531700;description=unspecified product;],[ID=PF3D7_0531800;description=5.8S ribosomal RNA;],[ID=PF3D7_0531900;description=unspecified product;],[ID=PF3D7_0532000;description=28S ribosomal RNA;]
Pf3D7_05_v3	1293521	1293666	Pf3D7_05_v3-1293521-1293666-for	145	+	[ID=PF3D7_0532000;description=28S ribosomal RNA;]
Pf3D7_05_v3	1293841	1294541	Pf3D7_05_v3-1293841-1294541-for	700	+	[ID=PF3D7_0532000;description=28S ribosomal RNA;]
Pf3D7_05_v3	1294631	1294821	Pf3D7_05_v3-1294631-1294821-for	190	+	[ID=PF3D7_0532000;description=28S ribosomal RNA;]
Pf3D7_05_v3	1295511	1295561	Pf3D7_05_v3-1295511-1295561-for	50	+	[ID=PF3D7_0532000;description=28S ribosomal RNA;]
Pf3D7_05_v3	1295751	1295811	Pf3D7_05_v3-1295751-1295811-for	60	+	[ID=PF3D7_0532000;description=28S ribosomal RNA;]
Pf3D7_05_v3	1295841	1296225	Pf3D7_05_v3-1295841-1296225-for	384	+	[ID=PF3D7_0532000;description=28S ribosomal RNA;]
Pf3D7_05_v3	1296778	1298667	Pf3D7_05_v3-1296778-1298667	1889	+	NA
Pf3D7_05_v3	1298730	1298910	Pf3D7_05_v3-1298730-1298910	180	+	NA
Pf3D7_05_v3	1298985	1299098	Pf3D7_05_v3-1298985-1299098	113	+	NA
Pf3D7_05_v3	1299153	1299360	Pf3D7_05_v3-1299153-1299360	207	+	NA
Pf3D7_05_v3	1299497	1299958	Pf3D7_05_v3-1299497-1299958	461	+	NA
Pf3D7_05_v3	1300233	1300505	Pf3D7_05_v3-1300233-1300505	272	+	NA
Pf3D7_05_v3	1301064	1301326	Pf3D7_05_v3-1301064-1301326	262	+	[ID=PF3D7_0532100;description=early transcribed membrane protein 5;]
Pf3D7_05_v3	1301482	1301853	Pf3D7_05_v3-1301482-1301853	371	+	[ID=PF3D7_0532100;description=early transcribed membrane protein 5;]
Pf3D7_05_v3	1302209	1302431	Pf3D7_05_v3-1302209-1302431	222	+	NA
Pf3D7_05_v3	1302491	1302736	Pf3D7_05_v3-1302491-1302736	245	+	NA
Pf3D7_05_v3	1302910	1303055	Pf3D7_05_v3-1302910-1303055	145	+	NA
Pf3D7_05_v3	1303682	1304270	Pf3D7_05_v3-1303682-1304270	588	+	[ID=PF3D7_0532200;description=Plasmodium exported protein (PHISTc), unknown function;]
Pf3D7_05_v3	1304442	1304550	Pf3D7_05_v3-1304442-1304550	108	+	[ID=PF3D7_0532200;description=Plasmodium exported protein (PHISTc), unknown function;]
Pf3D7_05_v3	1305168	1305283	Pf3D7_05_v3-1305168-1305283	115	+	NA
Pf3D7_05_v3	1305379	1305566	Pf3D7_05_v3-1305379-1305566	187	+	NA
Pf3D7_05_v3	1305636	1305868	Pf3D7_05_v3-1305636-1305868	232	+	NA
Pf3D7_05_v3	1305920	1306129	Pf3D7_05_v3-1305920-1306129	209	+	NA
Pf3D7_05_v3	1306860	1307192	Pf3D7_05_v3-1306860-1307192	332	+	NA
Pf3D7_05_v3	1307260	1307360	Pf3D7_05_v3-1307260-1307360	100	+	NA
Pf3D7_05_v3	1307457	1307763	Pf3D7_05_v3-1307457-1307763	306	+	NA
Pf3D7_05_v3	1307947	1308096	Pf3D7_05_v3-1307947-1308096	149	+	NA
Pf3D7_05_v3	1308286	1308520	Pf3D7_05_v3-1308286-1308520	234	+	[ID=PF3D7_0532300;description=Plasmodium exported protein (PHISTb), unknown function;]
Pf3D7_05_v3	1308617	1309321	Pf3D7_05_v3-1308617-1309321	704	+	[ID=PF3D7_0532300;description=Plasmodium exported protein (PHISTb), unknown function;]
Pf3D7_05_v3	1309373	1309932	Pf3D7_05_v3-1309373-1309932	559	+	[ID=PF3D7_0532300;description=Plasmodium exported protein (PHISTb), unknown function;]
Pf3D7_05_v3	1310350	1310913	Pf3D7_05_v3-1310350-1310913	563	+	NA
Pf3D7_05_v3	1310967	1311097	Pf3D7_05_v3-1310967-1311097	130	+	NA
Pf3D7_05_v3	1311165	1311434	Pf3D7_05_v3-1311165-1311434	269	+	NA
Pf3D7_05_v3	1312420	1312667	Pf3D7_05_v3-1312420-1312667	247	+	[ID=PF3D7_0532400;description=lysine-rich membrane-associated PHISTb protein;]
Pf3D7_05_v3	1312769	1313828	Pf3D7_05_v3-1312769-1313828	1059	+	[ID=PF3D7_0532400;description=lysine-rich membrane-associated PHISTb protein;]
Pf3D7_05_v3	1314133	1314270	Pf3D7_05_v3-1314133-1314270	137	+	[ID=PF3D7_0532400;description=lysine-rich membrane-associated PHISTb protein;]
Pf3D7_05_v3	1314697	1314881	Pf3D7_05_v3-1314697-1314881	184	+	NA
Pf3D7_05_v3	1314944	1315407	Pf3D7_05_v3-1314944-1315407	463	+	NA
Pf3D7_05_v3	1315481	1315700	Pf3D7_05_v3-1315481-1315700	219	+	NA
Pf3D7_05_v3	1315893	1316081	Pf3D7_05_v3-1315893-1316081	188	+	NA
Pf3D7_05_v3	1316211	1316410	Pf3D7_05_v3-1316211-1316410	199	+	[ID=PF3D7_0532500;description=Plasmodium exported protein, unknown function;]
Pf3D7_05_v3	1316470	1316787	Pf3D7_05_v3-1316470-1316787	317	+	[ID=PF3D7_0532500;description=Plasmodium exported protein, unknown function;]
Pf3D7_05_v3	1317216	1317360	Pf3D7_05_v3-1317216-1317360	144	+	NA
Pf3D7_05_v3	1317415	1317520	Pf3D7_05_v3-1317415-1317520	105	+	NA
Pf3D7_05_v3	1317607	1318089	Pf3D7_05_v3-1317607-1318089	482	+	NA
Pf3D7_05_v3	1318298	1319007	Pf3D7_05_v3-1318298-1319007	709	+	[ID=PF3D7_0532600;description=Plasmodium exported protein, unknown function;]
Pf3D7_05_v3	1319303	1319422	Pf3D7_05_v3-1319303-1319422	119	+	NA
Pf3D7_05_v3	1319619	1320153	Pf3D7_05_v3-1319619-1320153	534	+	NA
Pf3D7_05_v3	1320208	1320444	Pf3D7_05_v3-1320208-1320444	236	+	NA
Pf3D7_05_v3	1320543	1320802	Pf3D7_05_v3-1320543-1320802	259	+	NA
Pf3D7_05_v3	1320864	1321265	Pf3D7_05_v3-1320864-1321265	401	+	NA
Pf3D7_05_v3	1321568	1321687	Pf3D7_05_v3-1321568-1321687	119	+	NA
Pf3D7_05_v3	1321991	1322691	Pf3D7_05_v3-1321991-1322691	700	+	[ID=PF3D7_0532700;description=erythrocyte membrane protein 1 (PfEMP1), pseudogene;]
Pf3D7_05_v3	1322991	1323234	Pf3D7_05_v3-1322991-1323234	243	+	[ID=PF3D7_0532700;description=erythrocyte membrane protein 1 (PfEMP1), pseudogene;]
Pf3D7_05_v3	1338192	1338392	Pf3D7_05_v3-1338192-1338392	200	+	[ID=PF3D7_0533100;description=erythrocyte membrane protein 1 (PfEMP1), pseudogene;]
Pf3D7_05_v3	1340876	1341076	Pf3D7_05_v3-1340876-1341076	200	+	[ID=PF3D7_0533100;description=erythrocyte membrane protein 1 (PfEMP1), pseudogene;]
Pf3D7_05_v3	1341726	1342276	Pf3D7_05_v3-1341726-1342276	550	+	[ID=PF3D7_0533100;description=erythrocyte membrane protein 1 (PfEMP1), pseudogene;]
Pf3D7_07_v3	1035006	1035206	Pf3D7_07_v3-1035006-1035206	200	+	[ID=PF3D7_0724700;description=conserved Plasmodium protein, unknown function;]
Pf3D7_07_v3	1035784	1036684	Pf3D7_07_v3-1035784-1036684	900	+	[ID=PF3D7_0724700;description=conserved Plasmodium protein, unknown function;]
Pf3D7_07_v3	1036769	1037319	Pf3D7_07_v3-1036769-1037319	550	+	[ID=PF3D7_0724700;description=conserved Plasmodium protein, unknown function;]
Pf3D7_07_v3	1037428	1037728	Pf3D7_07_v3-1037428-1037728	300	+	[ID=PF3D7_0724700;description=conserved Plasmodium protein, unknown function;]
Pf3D7_07_v3	1037797	1038747	Pf3D7_07_v3-1037797-1038747	950	+	[ID=PF3D7_0724700;description=conserved Plasmodium protein, unknown function;]
Pf3D7_07_v3	1038889	1039089	Pf3D7_07_v3-1038889-1039089	200	+	[ID=PF3D7_0724700;description=conserved Plasmodium protein, unknown function;]
Pf3D7_07_v3	1039374	1040024	Pf3D7_07_v3-1039374-1040024	650	+	[ID=PF3D7_0724700;description=conserved Plasmodium protein, unknown function;]
Pf3D7_07_v3	1040151	1040451	Pf3D7_07_v3-1040151-1040451	300	+	[ID=PF3D7_0724700;description=conserved Plasmodium protein, unknown function;]
Pf3D7_07_v3	1040873	1041723	Pf3D7_07_v3-1040873-1041723	850	+	[ID=PF3D7_0724700;description=conserved Plasmodium protein, unknown function;]
Pf3D7_07_v3	1042184	1042884	Pf3D7_07_v3-1042184-1042884	700	+	[ID=PF3D7_0724700;description=conserved Plasmodium protein, unknown function;]
Pf3D7_07_v3	1043094	1043644	Pf3D7_07_v3-1043094-1043644	550	+	[ID=PF3D7_0724700;description=conserved Plasmodium protein, unknown function;]
Pf3D7_07_v3	1043721	1044221	Pf3D7_07_v3-1043721-1044221	500	+	[ID=PF3D7_0724700;description=conserved Plasmodium protein, unknown function;]
Pf3D7_07_v3	1044676	1045426	Pf3D7_07_v3-1044676-1045426	750	+	[ID=PF3D7_0724700;description=conserved Plasmodium protein, unknown function;]
Pf3D7_07_v3	1045574	1046074	Pf3D7_07_v3-1045574-1046074	500	+	[ID=PF3D7_0724700;description=conserved Plasmodium protein, unknown function;]
Pf3D7_07_v3	1047866	1048116	Pf3D7_07_v3-1047866-1048116	250	+	[ID=PF3D7_0724800;description=kelch domain-containing protein, putative;]
Pf3D7_07_v3	1048251	1049051	Pf3D7_07_v3-1048251-1049051	800	+	[ID=PF3D7_0724800;description=kelch domain-containing protein, putative;]
Pf3D7_07_v3	1049167	1049367	Pf3D7_07_v3-1049167-1049367	200	+	[ID=PF3D7_0724800;description=kelch domain-containing protein, putative;]
Pf3D7_07_v3	1050728	1050928	Pf3D7_07_v3-1050728-1050928	200	+	NA
Pf3D7_07_v3	1052468	1054018	Pf3D7_07_v3-1052468-1054018	1550	+	[ID=PF3D7_0724900;description=kinesin-19, putative;]
Pf3D7_07_v3	1054120	1055420	Pf3D7_07_v3-1054120-1055420	1300	+	[ID=PF3D7_0724900;description=kinesin-19, putative;]
Pf3D7_07_v3	1055610	1057010	Pf3D7_07_v3-1055610-1057010	1400	+	[ID=PF3D7_0724900;description=kinesin-19, putative;]
Pf3D7_07_v3	1057411	1057761	Pf3D7_07_v3-1057411-1057761	350	+	[ID=PF3D7_0724900;description=kinesin-19, putative;]
Pf3D7_07_v3	1057811	1058211	Pf3D7_07_v3-1057811-1058211	400	+	[ID=PF3D7_0724900;description=kinesin-19, putative;]
Pf3D7_07_v3	1058899	1059849	Pf3D7_07_v3-1058899-1059849	950	+	[ID=PF3D7_0725000;description=exonuclease I, putative;]
Pf3D7_07_v3	1060351	1061301	Pf3D7_07_v3-1060351-1061301	950	+	[ID=PF3D7_0725000;description=exonuclease I, putative;]
Pf3D7_07_v3	1061536	1062036	Pf3D7_07_v3-1061536-1062036	500	+	[ID=PF3D7_0725000;description=exonuclease I, putative;]
Pf3D7_07_v3	1062147	1062947	Pf3D7_07_v3-1062147-1062947	800	+	[ID=PF3D7_0725000;description=exonuclease I, putative;]
Pf3D7_07_v3	1063446	1063646	Pf3D7_07_v3-1063446-1063646	200	+	NA
Pf3D7_07_v3	1065226	1065926	Pf3D7_07_v3-1065226-1065926	700	+	[ID=PF3D7_0725100;description=conserved Plasmodium membrane protein, unknown function;]
Pf3D7_07_v3	1066236	1067136	Pf3D7_07_v3-1066236-1067136	900	+	[ID=PF3D7_0725100;description=conserved Plasmodium membrane protein, unknown function;]
Pf3D7_07_v3	1067186	1067736	Pf3D7_07_v3-1067186-1067736	550	+	[ID=PF3D7_0725100;description=conserved Plasmodium membrane protein, unknown function;]
Pf3D7_07_v3	1068050	1068600	Pf3D7_07_v3-1068050-1068600	550	+	[ID=PF3D7_0725100;description=conserved Plasmodium membrane protein, unknown function;]
Pf3D7_07_v3	1068696	1069796	Pf3D7_07_v3-1068696-1069796	1100	+	[ID=PF3D7_0725100;description=conserved Plasmodium membrane protein, unknown function;]
Pf3D7_07_v3	1070001	1070301	Pf3D7_07_v3-1070001-1070301	300	+	[ID=PF3D7_0725100;description=conserved Plasmodium membrane protein, unknown function;]
Pf3D7_07_v3	1071365	1071615	Pf3D7_07_v3-1071365-1071615	250	+	[ID=PF3D7_0725200;description=mago nashi protein homologue, putative;]
Pf3D7_07_v3	1072536	1074386	Pf3D7_07_v3-1072536-1074386	1850	+	[ID=PF3D7_0725300;description=conserved protein, unknown function;]
Pf3D7_07_v3	1074845	1075095	Pf3D7_07_v3-1074845-1075095	250	+	NA
Pf3D7_07_v3	1075262	1075512	Pf3D7_07_v3-1075262-1075512	250	+	NA
Pf3D7_07_v3	1076396	1076596	Pf3D7_07_v3-1076396-1076596	200	+	NA
Pf3D7_07_v3	1078823	1079073	Pf3D7_07_v3-1078823-1079073	250	+	[ID=PF3D7_0725400;description=conserved Plasmodium protein, unknown function;]
Pf3D7_07_v3	1079197	1079447	Pf3D7_07_v3-1079197-1079447	250	+	[ID=PF3D7_0725400;description=conserved Plasmodium protein, unknown function;]
Pf3D7_07_v3	1079858	1080058	Pf3D7_07_v3-1079858-1080058	200	+	[ID=PF3D7_0725400;description=conserved Plasmodium protein, unknown function;]
Pf3D7_07_v3	1082043	1082243	Pf3D7_07_v3-1082043-1082243	200	+	NA
Pf3D7_07_v3	1082878	1083228	Pf3D7_07_v3-1082878-1083228	350	+	NA
Pf3D7_07_v3	1083328	1083771	Pf3D7_05_v3-1289171-1289611-for	443	+	[ID=PF3D7_0725600;description=18S ribosomal RNA;]
Pf3D7_07_v3	1083841	1084351	Pf3D7_05_v3-1289681-1290191-for	510	+	[ID=PF3D7_0725600;description=18S ribosomal RNA;]
Pf3D7_07_v3	1084371	1085088	Pf3D7_05_v3-1290211-1290931-for	717	+	[ID=PF3D7_0725600;description=18S ribosomal RNA;]
Pf3D7_07_v3	1085218	1085363	Pf3D7_05_v3-1291061-1291206-for	145	+	[ID=PF3D7_0725600;description=18S ribosomal RNA;]
Pf3D7_07_v3	1085368	1086751	Pf3D7_05_v3-1291211-1292591-for	1383	+	[ID=PF3D7_0725600;description=18S ribosomal RNA;],[ID=PF3D7_0725700;description=unspecified product;],[ID=PF3D7_0725800;description=5.8S ribosomal RNA;],[ID=PF3D7_0725900;description=unspecified product;],[ID=PF3D7_0726000;description=28S ribosomal RNA;]
Pf3D7_07_v3	1087679	1087823	Pf3D7_05_v3-1293521-1293666-for	144	+	[ID=PF3D7_0726000;description=28S ribosomal RNA;]
Pf3D7_07_v3	1087998	1088699	Pf3D7_05_v3-1293841-1294541-for	701	+	[ID=PF3D7_0726000;description=28S ribosomal RNA;]
Pf3D7_07_v3	1088789	1088979	Pf3D7_05_v3-1294631-1294821-for	190	+	[ID=PF3D7_0726000;description=28S ribosomal RNA;]
Pf3D7_07_v3	1089669	1089719	Pf3D7_05_v3-1295511-1295561-for	50	+	[ID=PF3D7_0726000;description=28S ribosomal RNA;]
Pf3D7_07_v3	1089909	1089969	Pf3D7_05_v3-1295751-1295811-for	60	+	[ID=PF3D7_0726000;description=28S ribosomal RNA;]
Pf3D7_07_v3	1089999	1090383	Pf3D7_05_v3-1295841-1296225-for	384	+	[ID=PF3D7_0726000;description=28S ribosomal RNA;]
Pf3D7_07_v3	1090983	1091483	Pf3D7_07_v3-1090983-1091483	500	+	NA
Pf3D7_07_v3	1091533	1091883	Pf3D7_07_v3-1091533-1091883	350	+	NA
Pf3D7_07_v3	1092211	1092711	Pf3D7_07_v3-1092211-1092711	500	+	NA
Pf3D7_07_v3	1093570	1094220	Pf3D7_07_v3-1093570-1094220	650	+	[ID=PF3D7_0726100;description=Plasmodium exported protein, unknown function;]
Pf3D7_07_v3	1094326	1094976	Pf3D7_07_v3-1094326-1094976	650	+	[ID=PF3D7_0726100;description=Plasmodium exported protein, unknown function;]
Pf3D7_07_v3	1095258	1095758	Pf3D7_07_v3-1095258-1095758	500	+	[ID=PF3D7_0726100;description=Plasmodium exported protein, unknown function;]
Pf3D7_07_v3	1095898	1096098	Pf3D7_07_v3-1095898-1096098	200	+	[ID=PF3D7_0726100;description=Plasmodium exported protein, unknown function;]
Pf3D7_07_v3	1096407	1096607	Pf3D7_07_v3-1096407-1096607	200	+	NA
Pf3D7_07_v3	1098281	1098481	Pf3D7_07_v3-1098281-1098481	200	+	NA
Pf3D7_07_v3	1099067	1099417	Pf3D7_07_v3-1099067-1099417	350	+	NA
Pf3D7_07_v3	1099798	1099998	Pf3D7_07_v3-1099798-1099998	200	+	NA
Pf3D7_07_v3	1101276	1101576	Pf3D7_07_v3-1101276-1101576	300	+	[ID=PF3D7_0726200;description=serine/threonine protein kinase, FIKK family;]
Pf3D7_07_v3	1101849	1102299	Pf3D7_07_v3-1101849-1102299	450	+	[ID=PF3D7_0726200;description=serine/threonine protein kinase, FIKK family;]
Pf3D7_07_v3	1104164	1106064	Pf3D7_07_v3-1104164-1106064	1900	+	[ID=PF3D7_0726300;description=DNA mismatch repair protein PMS1, putative;]
Pf3D7_07_v3	1106713	1107163	Pf3D7_07_v3-1106713-1107163	450	+	[ID=PF3D7_0726300;description=DNA mismatch repair protein PMS1, putative;]
Pf3D7_07_v3	1107247	1107997	Pf3D7_07_v3-1107247-1107997	750	+	[ID=PF3D7_0726300;description=DNA mismatch repair protein PMS1, putative;]
Pf3D7_07_v3	1108070	1108370	Pf3D7_07_v3-1108070-1108370	300	+	[ID=PF3D7_0726300;description=DNA mismatch repair protein PMS1, putative;]
Pf3D7_07_v3	1109149	1110299	Pf3D7_07_v3-1109149-1110299	1150	+	[ID=PF3D7_0726400;description=conserved Plasmodium membrane protein, unknown function;]
Pf3D7_07_v3	1110539	1110739	Pf3D7_07_v3-1110539-1110739	200	+	[ID=PF3D7_0726400;description=conserved Plasmodium membrane protein, unknown function;]
Pf3D7_07_v3	1110827	1111077	Pf3D7_07_v3-1110827-1111077	250	+	[ID=PF3D7_0726400;description=conserved Plasmodium membrane protein, unknown function;]
Pf3D7_07_v3	1111186	1111586	Pf3D7_07_v3-1111186-1111586	400	+	[ID=PF3D7_0726400;description=conserved Plasmodium membrane protein, unknown function;]
Pf3D7_07_v3	1111725	1112825	Pf3D7_07_v3-1111725-1112825	1100	+	[ID=PF3D7_0726400;description=conserved Plasmodium membrane protein, unknown function;]
Pf3D7_07_v3	1112961	1115561	Pf3D7_07_v3-1112961-1115561	2600	+	[ID=PF3D7_0726400;description=conserved Plasmodium membrane protein, unknown function;]
Pf3D7_07_v3	1115644	1116744	Pf3D7_07_v3-1115644-1116744	1100	+	[ID=PF3D7_0726400;description=conserved Plasmodium membrane protein, unknown function;]
Pf3D7_07_v3	1116828	1118078	Pf3D7_07_v3-1116828-1118078	1250	+	[ID=PF3D7_0726400;description=conserved Plasmodium membrane protein, unknown function;]
Pf3D7_07_v3	1118078	1118728	Pf3D7_07_v3-1118078-1118728	650	+	[ID=PF3D7_0726400;description=conserved Plasmodium membrane protein, unknown function;]
Pf3D7_07_v3	1118907	1119407	Pf3D7_07_v3-1118907-1119407	500	+	[ID=PF3D7_0726400;description=conserved Plasmodium membrane protein, unknown function;]
Pf3D7_07_v3	1119578	1120478	Pf3D7_07_v3-1119578-1120478	900	+	[ID=PF3D7_0726400;description=conserved Plasmodium membrane protein, unknown function;]
Pf3D7_07_v3	1120719	1121269	Pf3D7_07_v3-1120719-1121269	550	+	[ID=PF3D7_0726400;description=conserved Plasmodium membrane protein, unknown function;]
Pf3D7_07_v3	1121363	1121763	Pf3D7_07_v3-1121363-1121763	400	+	[ID=PF3D7_0726400;description=conserved Plasmodium membrane protein, unknown function;]
Pf3D7_07_v3	1121999	1122849	Pf3D7_07_v3-1121999-1122849	850	+	[ID=PF3D7_0726400;description=conserved Plasmodium membrane protein, unknown function;]
Pf3D7_07_v3	1123211	1123661	Pf3D7_07_v3-1123211-1123661	450	+	[ID=PF3D7_0726400;description=conserved Plasmodium membrane protein, unknown function;]
Pf3D7_07_v3	1123845	1124045	Pf3D7_07_v3-1123845-1124045	200	+	[ID=PF3D7_0726400;description=conserved Plasmodium membrane protein, unknown function;]
Pf3D7_07_v3	1124266	1124466	Pf3D7_07_v3-1124266-1124466	200	+	[ID=PF3D7_0726400;description=conserved Plasmodium membrane protein, unknown function;]
Pf3D7_07_v3	1127330	1128380	Pf3D7_07_v3-1127330-1128380	1050	+	[ID=PF3D7_0726500;description=ubiquitin carboxyl-terminal hydrolase, putative;]
Pf3D7_07_v3	1128552	1128802	Pf3D7_07_v3-1128552-1128802	250	+	[ID=PF3D7_0726500;description=ubiquitin carboxyl-terminal hydrolase, putative;]
Pf3D7_07_v3	1128938	1129238	Pf3D7_07_v3-1128938-1129238	300	+	[ID=PF3D7_0726500;description=ubiquitin carboxyl-terminal hydrolase, putative;]
Pf3D7_07_v3	1129313	1129563	Pf3D7_07_v3-1129313-1129563	250	+	[ID=PF3D7_0726500;description=ubiquitin carboxyl-terminal hydrolase, putative;]
Pf3D7_07_v3	1130274	1131024	Pf3D7_07_v3-1130274-1131024	750	+	[ID=PF3D7_0726500;description=ubiquitin carboxyl-terminal hydrolase, putative;]
Pf3D7_07_v3	1131082	1131382	Pf3D7_07_v3-1131082-1131382	300	+	[ID=PF3D7_0726500;description=ubiquitin carboxyl-terminal hydrolase, putative;]
Pf3D7_07_v3	1131571	1132221	Pf3D7_07_v3-1131571-1132221	650	+	[ID=PF3D7_0726500;description=ubiquitin carboxyl-terminal hydrolase, putative;]
Pf3D7_07_v3	1132328	1134278	Pf3D7_07_v3-1132328-1134278	1950	+	[ID=PF3D7_0726500;description=ubiquitin carboxyl-terminal hydrolase, putative;]
Pf3D7_07_v3	1135052	1135452	Pf3D7_07_v3-1135052-1135452	400	+	[ID=PF3D7_0726500;description=ubiquitin carboxyl-terminal hydrolase, putative;]
Pf3D7_07_v3	1135564	1136514	Pf3D7_07_v3-1135564-1136514	950	+	[ID=PF3D7_0726500;description=ubiquitin carboxyl-terminal hydrolase, putative;]
Pf3D7_07_v3	1139622	1140022	Pf3D7_07_v3-1139622-1140022	400	+	NA
Pf3D7_07_v3	1140459	1141059	Pf3D7_07_v3-1140459-1141059	600	+	[ID=PF3D7_0726600;description=conserved Plasmodium protein, unknown function;]
Pf3D7_07_v3	1141195	1141845	Pf3D7_07_v3-1141195-1141845	650	+	[ID=PF3D7_0726600;description=conserved Plasmodium protein, unknown function;]
Pf3D7_07_v3	1141921	1142121	Pf3D7_07_v3-1141921-1142121	200	+	[ID=PF3D7_0726600;description=conserved Plasmodium protein, unknown function;]
Pf3D7_07_v3	1142354	1142754	Pf3D7_07_v3-1142354-1142754	400	+	[ID=PF3D7_0726600;description=conserved Plasmodium protein, unknown function;]
Pf3D7_07_v3	1142836	1143036	Pf3D7_07_v3-1142836-1143036	200	+	NA
Pf3D7_07_v3	1143219	1143869	Pf3D7_07_v3-1143219-1143869	650	+	[ID=PF3D7_0726700;description=conserved Plasmodium protein, unknown function;]
Pf3D7_07_v3	1144020	1144370	Pf3D7_07_v3-1144020-1144370	350	+	[ID=PF3D7_0726800;description=dolichyl-diphosphooligosaccharide--protein glycosyltransferase subunit OST2, putative;]
Pf3D7_07_v3	1145646	1146396	Pf3D7_07_v3-1145646-1146396	750	+	[ID=PF3D7_0726900;description=mitochondrial import inner membrane translocase subunit TIM50, putative;]
Pf3D7_07_v3	1146452	1146802	Pf3D7_07_v3-1146452-1146802	350	+	[ID=PF3D7_0726900;description=mitochondrial import inner membrane translocase subunit TIM50, putative;]
Pf3D7_07_v3	1146867	1147167	Pf3D7_07_v3-1146867-1147167	300	+	[ID=PF3D7_0726900;description=mitochondrial import inner membrane translocase subunit TIM50, putative;]
Pf3D7_07_v3	1147548	1147998	Pf3D7_07_v3-1147548-1147998	450	+	[ID=PF3D7_0727000;description=vacuolar protein sorting-associated protein 53, putative;]
Pf3D7_07_v3	1148048	1148998	Pf3D7_07_v3-1148048-1148998	950	+	[ID=PF3D7_0727000;description=vacuolar protein sorting-associated protein 53, putative;]
Pf3D7_07_v3	1149221	1149771	Pf3D7_07_v3-1149221-1149771	550	+	[ID=PF3D7_0727000;description=vacuolar protein sorting-associated protein 53, putative;]
Pf3D7_07_v3	1150142	1150792	Pf3D7_07_v3-1150142-1150792	650	+	[ID=PF3D7_0727000;description=vacuolar protein sorting-associated protein 53, putative;]
Pf3D7_07_v3	1152174	1152474	Pf3D7_07_v3-1152174-1152474	300	+	[ID=PF3D7_0727100;description=conserved protein, unknown function;]
Pf3D7_07_v3	1153119	1153619	Pf3D7_07_v3-1153119-1153619	500	+	[ID=PF3D7_0727100;description=conserved protein, unknown function;]
Pf3D7_07_v3	1153809	1154559	Pf3D7_07_v3-1153809-1154559	750	+	[ID=PF3D7_0727100;description=conserved protein, unknown function;]
Pf3D7_07_v3	1154741	1155341	Pf3D7_07_v3-1154741-1155341	600	+	[ID=PF3D7_0727100;description=conserved protein, unknown function;]
Pf3D7_07_v3	1156075	1156325	Pf3D7_07_v3-1156075-1156325	250	+	NA
Pf3D7_07_v3	1156595	1157945	Pf3D7_07_v3-1156595-1157945	1350	+	[ID=PF3D7_0727200;description=cysteine desulfurase, putative;]
Pf3D7_07_v3	1158012	1158412	Pf3D7_07_v3-1158012-1158412	400	+	[ID=PF3D7_0727200;description=cysteine desulfurase, putative;]
Pf3D7_07_v3	1159718	1160818	Pf3D7_07_v3-1159718-1160818	1100	+	[ID=PF3D7_0727300;description=DNA (cytosine-5)-methyltransferase;]
Pf3D7_07_v3	1160868	1161368	Pf3D7_07_v3-1160868-1161368	500	+	[ID=PF3D7_0727300;description=DNA (cytosine-5)-methyltransferase;]
Pf3D7_07_v3	1161449	1161799	Pf3D7_07_v3-1161449-1161799	350	+	[ID=PF3D7_0727300;description=DNA (cytosine-5)-methyltransferase;]
Pf3D7_07_v3	1163142	1163842	Pf3D7_07_v3-1163142-1163842	700	+	[ID=PF3D7_0727400;description=proteasome subunit alpha type-5, putative;]
Pf3D7_07_v3	1164468	1166218	Pf3D7_07_v3-1164468-1166218	1750	+	[ID=PF3D7_0727500;description=mTERF domain-containing protein, putative;]
Pf3D7_07_v3	1166309	1166609	Pf3D7_07_v3-1166309-1166609	300	+	[ID=PF3D7_0727500;description=mTERF domain-containing protein, putative;]
Pf3D7_07_v3	1167425	1168325	Pf3D7_07_v3-1167425-1168325	900	+	[ID=PF3D7_0727600;description=conserved Plasmodium protein, unknown function;]
Pf3D7_07_v3	1168418	1168618	Pf3D7_07_v3-1168418-1168618	200	+	[ID=PF3D7_0727600;description=conserved Plasmodium protein, unknown function;]
Pf3D7_07_v3	1168759	1170359	Pf3D7_07_v3-1168759-1170359	1600	+	[ID=PF3D7_0727600;description=conserved Plasmodium protein, unknown function;]
Pf3D7_07_v3	1171292	1171692	Pf3D7_07_v3-1171292-1171692	400	+	[ID=PF3D7_0727700;description=conserved Plasmodium protein, unknown function;]
Pf3D7_07_v3	1171791	1172291	Pf3D7_07_v3-1171791-1172291	500	+	[ID=PF3D7_0727700;description=conserved Plasmodium protein, unknown function;]
Pf3D7_07_v3	1172466	1173116	Pf3D7_07_v3-1172466-1173116	650	+	[ID=PF3D7_0727700;description=conserved Plasmodium protein, unknown function;]
Pf3D7_07_v3	1173199	1173499	Pf3D7_07_v3-1173199-1173499	300	+	[ID=PF3D7_0727700;description=conserved Plasmodium protein, unknown function;]
Pf3D7_07_v3	1173713	1174163	Pf3D7_07_v3-1173713-1174163	450	+	[ID=PF3D7_0727700;description=conserved Plasmodium protein, unknown function;]
Pf3D7_07_v3	1175377	1175627	Pf3D7_07_v3-1175377-1175627	250	+	NA
Pf3D7_07_v3	1175882	1177682	Pf3D7_07_v3-1175882-1177682	1800	+	[ID=PF3D7_0727800;description=cation transporting ATPase, putative;]
Pf3D7_07_v3	1178101	1178901	Pf3D7_07_v3-1178101-1178901	800	+	[ID=PF3D7_0727800;description=cation transporting ATPase, putative;]
Pf3D7_07_v3	1179040	1179340	Pf3D7_07_v3-1179040-1179340	300	+	[ID=PF3D7_0727800;description=cation transporting ATPase, putative;]
Pf3D7_07_v3	1179517	1181717	Pf3D7_07_v3-1179517-1181717	2200	+	[ID=PF3D7_0727800;description=cation transporting ATPase, putative;]
Pf3D7_07_v3	1182048	1182298	Pf3D7_07_v3-1182048-1182298	250	+	NA
Pf3D7_07_v3	1182457	1182657	Pf3D7_07_v3-1182457-1182657	200	+	NA
Pf3D7_07_v3	1184369	1184769	Pf3D7_07_v3-1184369-1184769	400	+	[ID=PF3D7_0727900;description=conserved Plasmodium protein, unknown function;]
Pf3D7_07_v3	1184923	1186223	Pf3D7_07_v3-1184923-1186223	1300	+	[ID=PF3D7_0727900;description=conserved Plasmodium protein, unknown function;]
Pf3D7_07_v3	1186425	1186975	Pf3D7_07_v3-1186425-1186975	550	+	[ID=PF3D7_0727900;description=conserved Plasmodium protein, unknown function;]
Pf3D7_07_v3	1187290	1188290	Pf3D7_07_v3-1187290-1188290	1000	+	[ID=PF3D7_0727900;description=conserved Plasmodium protein, unknown function;]
Pf3D7_07_v3	1188696	1189546	Pf3D7_07_v3-1188696-1189546	850	+	[ID=PF3D7_0727900;description=conserved Plasmodium protein, unknown function;]
Pf3D7_07_v3	1189696	1190146	Pf3D7_07_v3-1189696-1190146	450	+	[ID=PF3D7_0727900;description=conserved Plasmodium protein, unknown function;]
Pf3D7_07_v3	1191298	1192048	Pf3D7_07_v3-1191298-1192048	750	+	[ID=PF3D7_0728000;description=eukaryotic translation initiation factor 2 subunit alpha;]
Pf3D7_07_v3	1193571	1193871	Pf3D7_07_v3-1193571-1193871	300	+	[ID=PF3D7_0728100;description=conserved Plasmodium membrane protein, unknown function;]
Pf3D7_07_v3	1193921	1194921	Pf3D7_07_v3-1193921-1194921	1000	+	[ID=PF3D7_0728100;description=conserved Plasmodium membrane protein, unknown function;]
Pf3D7_07_v3	1195083	1195833	Pf3D7_07_v3-1195083-1195833	750	+	[ID=PF3D7_0728100;description=conserved Plasmodium membrane protein, unknown function;]
Pf3D7_07_v3	1196020	1196520	Pf3D7_07_v3-1196020-1196520	500	+	[ID=PF3D7_0728100;description=conserved Plasmodium membrane protein, unknown function;]
Pf3D7_07_v3	1196622	1197872	Pf3D7_07_v3-1196622-1197872	1250	+	[ID=PF3D7_0728100;description=conserved Plasmodium membrane protein, unknown function;]
Pf3D7_07_v3	1198039	1198439	Pf3D7_07_v3-1198039-1198439	400	+	[ID=PF3D7_0728100;description=conserved Plasmodium membrane protein, unknown function;]
Pf3D7_07_v3	1198512	1199112	Pf3D7_07_v3-1198512-1199112	600	+	[ID=PF3D7_0728100;description=conserved Plasmodium membrane protein, unknown function;]
Pf3D7_07_v3	1199195	1199695	Pf3D7_07_v3-1199195-1199695	500	+	[ID=PF3D7_0728100;description=conserved Plasmodium membrane protein, unknown function;]
Pf3D7_07_v3	1199745	1201245	Pf3D7_07_v3-1199745-1201245	1500	+	[ID=PF3D7_0728100;description=conserved Plasmodium membrane protein, unknown function;]
Pf3D7_07_v3	1201423	1202023	Pf3D7_07_v3-1201423-1202023	600	+	[ID=PF3D7_0728100;description=conserved Plasmodium membrane protein, unknown function;]
Pf3D7_07_v3	1202209	1202659	Pf3D7_07_v3-1202209-1202659	450	+	[ID=PF3D7_0728100;description=conserved Plasmodium membrane protein, unknown function;]
Pf3D7_07_v3	1202803	1203103	Pf3D7_07_v3-1202803-1203103	300	+	[ID=PF3D7_0728100;description=conserved Plasmodium membrane protein, unknown function;]
Pf3D7_07_v3	1203451	1203901	Pf3D7_07_v3-1203451-1203901	450	+	[ID=PF3D7_0728100;description=conserved Plasmodium membrane protein, unknown function;]
Pf3D7_07_v3	1203998	1204248	Pf3D7_07_v3-1203998-1204248	250	+	[ID=PF3D7_0728100;description=conserved Plasmodium membrane protein, unknown function;]
Pf3D7_07_v3	1204537	1205287	Pf3D7_07_v3-1204537-1205287	750	+	[ID=PF3D7_0728100;description=conserved Plasmodium membrane protein, unknown function;]
Pf3D7_07_v3	1205446	1206696	Pf3D7_07_v3-1205446-1206696	1250	+	[ID=PF3D7_0728100;description=conserved Plasmodium membrane protein, unknown function;]
Pf3D7_07_v3	1206901	1207351	Pf3D7_07_v3-1206901-1207351	450	+	[ID=PF3D7_0728100;description=conserved Plasmodium membrane protein, unknown function;]
Pf3D7_07_v3	1207455	1208005	Pf3D7_07_v3-1207455-1208005	550	+	[ID=PF3D7_0728100;description=conserved Plasmodium membrane protein, unknown function;]
Pf3D7_07_v3	1208121	1209171	Pf3D7_07_v3-1208121-1209171	1050	+	[ID=PF3D7_0728100;description=conserved Plasmodium membrane protein, unknown function;]
Pf3D7_07_v3	1209263	1209513	Pf3D7_07_v3-1209263-1209513	250	+	[ID=PF3D7_0728100;description=conserved Plasmodium membrane protein, unknown function;]
Pf3D7_07_v3	1209662	1210312	Pf3D7_07_v3-1209662-1210312	650	+	[ID=PF3D7_0728100;description=conserved Plasmodium membrane protein, unknown function;]
Pf3D7_07_v3	1211486	1211686	Pf3D7_07_v3-1211486-1211686	200	+	[ID=PF3D7_0728200;description=actin-like protein, putative;]
Pf3D7_07_v3	1211935	1212735	Pf3D7_07_v3-1211935-1212735	800	+	[ID=PF3D7_0728200;description=actin-like protein, putative;]
Pf3D7_07_v3	1212956	1213556	Pf3D7_07_v3-1212956-1213556	600	+	[ID=PF3D7_0728200;description=actin-like protein, putative;]
Pf3D7_07_v3	1213919	1214469	Pf3D7_07_v3-1213919-1214469	550	+	[ID=PF3D7_0728300;description=conserved protein, unknown function;]
Pf3D7_07_v3	1215496	1215746	Pf3D7_07_v3-1215496-1215746	250	+	[ID=PF3D7_0728400;description=conserved Plasmodium protein, unknown function, unspecified product;]
Pf3D7_07_v3	1215928	1216128	Pf3D7_07_v3-1215928-1216128	200	+	[ID=PF3D7_0728500;description=conserved Plasmodium protein, unknown function;]
Pf3D7_07_v3	1216566	1216766	Pf3D7_07_v3-1216566-1216766	200	+	[ID=PF3D7_0728500;description=conserved Plasmodium protein, unknown function;]
Pf3D7_07_v3	1217749	1217949	Pf3D7_07_v3-1217749-1217949	200	+	NA
Pf3D7_07_v3	1218406	1219006	Pf3D7_07_v3-1218406-1219006	600	+	[ID=PF3D7_0728600;description=RING zinc finger protein, putative;]
Pf3D7_07_v3	1219336	1221086	Pf3D7_07_v3-1219336-1221086	1750	+	[ID=PF3D7_0728600;description=RING zinc finger protein, putative;]
Pf3D7_07_v3	1221213	1221613	Pf3D7_07_v3-1221213-1221613	400	+	[ID=PF3D7_0728600;description=RING zinc finger protein, putative;]
Pf3D7_07_v3	1221679	1222679	Pf3D7_07_v3-1221679-1222679	1000	+	[ID=PF3D7_0728600;description=RING zinc finger protein, putative;]
Pf3D7_07_v3	1223157	1223357	Pf3D7_07_v3-1223157-1223357	200	+	[ID=PF3D7_0728600;description=RING zinc finger protein, putative;]
Pf3D7_07_v3	1223450	1224200	Pf3D7_07_v3-1223450-1224200	750	+	[ID=PF3D7_0728600;description=RING zinc finger protein, putative;]
Pf3D7_07_v3	1224334	1224634	Pf3D7_07_v3-1224334-1224634	300	+	[ID=PF3D7_0728600;description=RING zinc finger protein, putative;]
Pf3D7_07_v3	1224787	1225137	Pf3D7_07_v3-1224787-1225137	350	+	[ID=PF3D7_0728600;description=RING zinc finger protein, putative;]
Pf3D7_07_v3	1226010	1226560	Pf3D7_07_v3-1226010-1226560	550	+	[ID=PF3D7_0728700;description=alpha/beta hydrolase, putative;]
Pf3D7_07_v3	1226632	1227432	Pf3D7_07_v3-1226632-1227432	800	+	[ID=PF3D7_0728700;description=alpha/beta hydrolase, putative;]
Pf3D7_07_v3	1227624	1228474	Pf3D7_07_v3-1227624-1228474	850	+	[ID=PF3D7_0728700;description=alpha/beta hydrolase, putative;]
Pf3D7_07_v3	1230775	1230975	Pf3D7_07_v3-1230775-1230975	200	+	[ID=PF3D7_0728800;description=conserved Plasmodium protein, unknown function;]
Pf3D7_07_v3	1231213	1231913	Pf3D7_07_v3-1231213-1231913	700	+	[ID=PF3D7_0728800;description=conserved Plasmodium protein, unknown function;]
Pf3D7_07_v3	1232756	1233056	Pf3D7_07_v3-1232756-1233056	300	+	[ID=PF3D7_0728900;description=RNA-binding protein, putative;]
Pf3D7_07_v3	1233128	1233328	Pf3D7_07_v3-1233128-1233328	200	+	[ID=PF3D7_0728900;description=RNA-binding protein, putative;]
Pf3D7_07_v3	1233769	1234719	Pf3D7_07_v3-1233769-1234719	950	+	[ID=PF3D7_0728900;description=RNA-binding protein, putative;]
Pf3D7_07_v3	1237333	1237533	Pf3D7_07_v3-1237333-1237533	200	+	NA
Pf3D7_07_v3	1238454	1238654	Pf3D7_07_v3-1238454-1238654	200	+	[ID=PF3D7_0729100;description=conserved Plasmodium protein, unknown function;]
Pf3D7_07_v3	1238704	1239254	Pf3D7_07_v3-1238704-1239254	550	+	[ID=PF3D7_0729100;description=conserved Plasmodium protein, unknown function;]
Pf3D7_07_v3	1239498	1242048	Pf3D7_07_v3-1239498-1242048	2550	+	[ID=PF3D7_0729100;description=conserved Plasmodium protein, unknown function;]
Pf3D7_07_v3	1242394	1242694	Pf3D7_07_v3-1242394-1242694	300	+	[ID=PF3D7_0729100;description=conserved Plasmodium protein, unknown function;]
Pf3D7_07_v3	1242983	1243283	Pf3D7_07_v3-1242983-1243283	300	+	[ID=PF3D7_0729100;description=conserved Plasmodium protein, unknown function;]
Pf3D7_07_v3	1243520	1244070	Pf3D7_07_v3-1243520-1244070	550	+	[ID=PF3D7_0729100;description=conserved Plasmodium protein, unknown function;]
Pf3D7_07_v3	1244200	1244650	Pf3D7_07_v3-1244200-1244650	450	+	[ID=PF3D7_0729100;description=conserved Plasmodium protein, unknown function;]
Pf3D7_07_v3	1244750	1246200	Pf3D7_07_v3-1244750-1246200	1450	+	[ID=PF3D7_0729100;description=conserved Plasmodium protein, unknown function;]
Pf3D7_07_v3	1246533	1246983	Pf3D7_07_v3-1246533-1246983	450	+	NA
Pf3D7_07_v3	1247371	1247621	Pf3D7_07_v3-1247371-1247621	250	+	[ID=PF3D7_0729200;description=1-cys peroxiredoxin;]
Pf3D7_07_v3	1247770	1248220	Pf3D7_07_v3-1247770-1248220	450	+	[ID=PF3D7_0729200;description=1-cys peroxiredoxin;]
Pf3D7_07_v3	1248826	1249476	Pf3D7_07_v3-1248826-1249476	650	+	[ID=PF3D7_0729300;description=60S ribosomal export protein NMD3, putative;]
Pf3D7_07_v3	1249526	1251476	Pf3D7_07_v3-1249526-1251476	1950	+	[ID=PF3D7_0729300;description=60S ribosomal export protein NMD3, putative;]
Pf3D7_07_v3	1252452	1252752	Pf3D7_07_v3-1252452-1252752	300	+	NA
Pf3D7_07_v3	1253264	1254064	Pf3D7_07_v3-1253264-1254064	800	+	[ID=PF3D7_0729400;description=ribosome biogenesis protein BRX1, putative;]
Pf3D7_07_v3	1255391	1256341	Pf3D7_07_v3-1255391-1256341	950	+	[ID=PF3D7_0729500;description=mRNA (N6-adenosine)-methyltransferase, putative;]
Pf3D7_07_v3	1256476	1257626	Pf3D7_07_v3-1256476-1257626	1150	+	[ID=PF3D7_0729500;description=mRNA (N6-adenosine)-methyltransferase, putative;]
Pf3D7_07_v3	1258213	1258413	Pf3D7_07_v3-1258213-1258413	200	+	NA
Pf3D7_07_v3	1258513	1258963	Pf3D7_07_v3-1258513-1258963	450	+	[ID=PF3D7_0729600;description=conserved Plasmodium protein, unknown function;]
Pf3D7_07_v3	1260172	1261272	Pf3D7_07_v3-1260172-1261272	1100	+	[ID=PF3D7_0729700;description=conserved protein, unknown function;]
Pf3D7_07_v3	1261457	1262757	Pf3D7_07_v3-1261457-1262757	1300	+	[ID=PF3D7_0729700;description=conserved protein, unknown function;]
Pf3D7_07_v3	1262852	1263102	Pf3D7_07_v3-1262852-1263102	250	+	NA
Pf3D7_07_v3	1263232	1263582	Pf3D7_07_v3-1263232-1263582	350	+	NA
Pf3D7_07_v3	1263908	1264108	Pf3D7_07_v3-1263908-1264108	200	+	NA
Pf3D7_07_v3	1264465	1264715	Pf3D7_07_v3-1264465-1264715	250	+	[ID=PF3D7_0729800;description=dynein light chain, putative;]
Pf3D7_07_v3	1278709	1280509	Pf3D7_07_v3-1278709-1280509	1800	+	[ID=PF3D7_0729900;description=dynein heavy chain, putative;]
Pf3D7_07_v3	1280559	1280859	Pf3D7_07_v3-1280559-1280859	300	+	[ID=PF3D7_0729900;description=dynein heavy chain, putative;]
Pf3D7_07_v3	1281065	1281315	Pf3D7_07_v3-1281065-1281315	250	+	[ID=PF3D7_0729900;description=dynein heavy chain, putative;]
Pf3D7_07_v3	1281801	1282301	Pf3D7_07_v3-1281801-1282301	500	+	[ID=PF3D7_0730000;description=conserved protein, unknown function;]
Pf3D7_07_v3	1282838	1285488	Pf3D7_07_v3-1282838-1285488	2650	+	[ID=PF3D7_0730100;description=tRNA pseudouridine synthase D, putative;]
Pf3D7_07_v3	1286027	1286527	Pf3D7_07_v3-1286027-1286527	500	+	[ID=PF3D7_0730200;description=AP-4 complex subunit beta, putative;]
Pf3D7_07_v3	1286730	1287580	Pf3D7_07_v3-1286730-1287580	850	+	[ID=PF3D7_0730200;description=AP-4 complex subunit beta, putative;]
Pf3D7_07_v3	1287994	1288794	Pf3D7_07_v3-1287994-1288794	800	+	[ID=PF3D7_0730200;description=AP-4 complex subunit beta, putative;]
Pf3D7_07_v3	1288970	1289170	Pf3D7_07_v3-1288970-1289170	200	+	[ID=PF3D7_0730200;description=AP-4 complex subunit beta, putative;]
Pf3D7_07_v3	1289228	1289428	Pf3D7_07_v3-1289228-1289428	200	+	[ID=PF3D7_0730200;description=AP-4 complex subunit beta, putative;]
Pf3D7_07_v3	1290967	1291217	Pf3D7_07_v3-1290967-1291217	250	+	NA
Pf3D7_07_v3	1291297	1291547	Pf3D7_07_v3-1291297-1291547	250	+	NA
Pf3D7_07_v3	1292167	1292367	Pf3D7_07_v3-1292167-1292367	200	+	NA
Pf3D7_07_v3	1292564	1292764	Pf3D7_07_v3-1292564-1292764	200	+	NA
Pf3D7_07_v3	1293147	1293397	Pf3D7_07_v3-1293147-1293397	250	+	NA
Pf3D7_07_v3	1293660	1293910	Pf3D7_07_v3-1293660-1293910	250	+	NA
Pf3D7_07_v3	1294175	1294475	Pf3D7_07_v3-1294175-1294475	300	+	NA
Pf3D7_07_v3	1295636	1295836	Pf3D7_07_v3-1295636-1295836	200	+	NA
Pf3D7_07_v3	1297419	1298019	Pf3D7_07_v3-1297419-1298019	600	+	[ID=PF3D7_0730300;description=AP2 domain transcription factor AP2-L, putative;]
Pf3D7_07_v3	1298144	1299244	Pf3D7_07_v3-1298144-1299244	1100	+	[ID=PF3D7_0730300;description=AP2 domain transcription factor AP2-L, putative;]
Pf3D7_07_v3	1299579	1300929	Pf3D7_07_v3-1299579-1300929	1350	+	[ID=PF3D7_0730300;description=AP2 domain transcription factor AP2-L, putative;]
Pf3D7_07_v3	1301066	1301416	Pf3D7_07_v3-1301066-1301416	350	+	[ID=PF3D7_0730300;description=AP2 domain transcription factor AP2-L, putative;]
Pf3D7_07_v3	1302129	1302629	Pf3D7_07_v3-1302129-1302629	500	+	NA
Pf3D7_07_v3	1304328	1304528	Pf3D7_07_v3-1304328-1304528	200	+	[ID=PF3D7_0730400;description=IMP1-like protein, putative;]
Pf3D7_07_v3	1305864	1307664	Pf3D7_07_v3-1305864-1307664	1800	+	[ID=PF3D7_0730500;description=conserved Plasmodium protein, unknown function;]
Pf3D7_07_v3	1307764	1308264	Pf3D7_07_v3-1307764-1308264	500	+	[ID=PF3D7_0730500;description=conserved Plasmodium protein, unknown function;]
Pf3D7_07_v3	1308530	1308980	Pf3D7_07_v3-1308530-1308980	450	+	[ID=PF3D7_0730500;description=conserved Plasmodium protein, unknown function;]
Pf3D7_07_v3	1309277	1310477	Pf3D7_07_v3-1309277-1310477	1200	+	[ID=PF3D7_0730500;description=conserved Plasmodium protein, unknown function;]
Pf3D7_07_v3	1310619	1311519	Pf3D7_07_v3-1310619-1311519	900	+	[ID=PF3D7_0730500;description=conserved Plasmodium protein, unknown function;]
Pf3D7_07_v3	1311652	1312202	Pf3D7_07_v3-1311652-1312202	550	+	[ID=PF3D7_0730500;description=conserved Plasmodium protein, unknown function;]
Pf3D7_07_v3	1312340	1312540	Pf3D7_07_v3-1312340-1312540	200	+	[ID=PF3D7_0730500;description=conserved Plasmodium protein, unknown function;]
Pf3D7_07_v3	1312806	1313106	Pf3D7_07_v3-1312806-1313106	300	+	[ID=PF3D7_0730500;description=conserved Plasmodium protein, unknown function;]
Pf3D7_07_v3	1313279	1313529	Pf3D7_07_v3-1313279-1313529	250	+	[ID=PF3D7_0730500;description=conserved Plasmodium protein, unknown function;]
Pf3D7_07_v3	1313587	1314187	Pf3D7_07_v3-1313587-1314187	600	+	[ID=PF3D7_0730500;description=conserved Plasmodium protein, unknown function;]
Pf3D7_07_v3	1317014	1317314	Pf3D7_07_v3-1317014-1317314	300	+	NA
Pf3D7_07_v3	1317975	1318225	Pf3D7_07_v3-1317975-1318225	250	+	[ID=PF3D7_0730600;description=tRNA Valine;]
Pf3D7_07_v3	1318624	1318824	Pf3D7_07_v3-1318624-1318824	200	+	NA
Pf3D7_07_v3	1319490	1319740	Pf3D7_07_v3-1319490-1319740	250	+	NA
Pf3D7_07_v3	1319809	1320009	Pf3D7_07_v3-1319809-1320009	200	+	NA
Pf3D7_07_v3	1320125	1320325	Pf3D7_07_v3-1320125-1320325	200	+	NA
Pf3D7_07_v3	1320896	1321196	Pf3D7_07_v3-1320896-1321196	300	+	NA
Pf3D7_07_v3	1321499	1322099	Pf3D7_07_v3-1321499-1322099	600	+	[ID=PF3D7_0730800;description=Plasmodium exported protein, unknown function, unspecified product;]
Pf3D7_07_v3	1322852	1323152	Pf3D7_07_v3-1322852-1323152	300	+	NA
Pf3D7_07_v3	1323782	1324132	Pf3D7_07_v3-1323782-1324132	350	+	NA
Pf3D7_07_v3	1324804	1325104	Pf3D7_07_v3-1324804-1325104	300	+	NA
Pf3D7_07_v3	1325371	1325571	Pf3D7_07_v3-1325371-1325571	200	+	[ID=PF3D7_0730900;description=EMP1-trafficking protein;]
Pf3D7_07_v3	1325621	1326371	Pf3D7_07_v3-1325621-1326371	750	+	[ID=PF3D7_0730900;description=EMP1-trafficking protein;]
Pf3D7_07_v3	1328439	1328789	Pf3D7_07_v3-1328439-1328789	350	+	[ID=PF3D7_0730900;description=EMP1-trafficking protein;]
Pf3D7_07_v3	1330576	1330976	Pf3D7_07_v3-1330576-1330976	400	+	[ID=PF3D7_0730900;description=EMP1-trafficking protein;]
Pf3D7_07_v3	1331856	1332256	Pf3D7_07_v3-1331856-1332256	400	+	NA
Pf3D7_07_v3	1332679	1333079	Pf3D7_07_v3-1332679-1333079	400	+	NA
Pf3D7_07_v3	1334012	1334362	Pf3D7_07_v3-1334012-1334362	350	+	[ID=PF3D7_0731000;description=unspecified product;]
Pf3D7_07_v3	1335210	1335560	Pf3D7_07_v3-1335210-1335560	350	+	NA
Pf3D7_07_v3	1336397	1336597	Pf3D7_07_v3-1336397-1336597	200	+	NA
Pf3D7_07_v3	1336762	1336962	Pf3D7_07_v3-1336762-1336962	200	+	NA
Pf3D7_07_v3	1337090	1337290	Pf3D7_07_v3-1337090-1337290	200	+	NA
Pf3D7_07_v3	1338477	1339177	Pf3D7_07_v3-1338477-1339177	700	+	[ID=PF3D7_0731100;description=EMP1-trafficking protein;]
Pf3D7_07_v3	1339300	1339550	Pf3D7_07_v3-1339300-1339550	250	+	[ID=PF3D7_0731100;description=EMP1-trafficking protein;]
Pf3D7_07_v3	1340034	1341834	Pf3D7_07_v3-1340034-1341834	1800	+	[ID=PF3D7_0731100;description=EMP1-trafficking protein;]
Pf3D7_07_v3	1342798	1343548	Pf3D7_07_v3-1342798-1343548	750	+	[ID=PF3D7_0731200;description=Plasmodium exported protein, unknown function;]
Pf3D7_07_v3	1343967	1344167	Pf3D7_07_v3-1343967-1344167	200	+	[ID=PF3D7_0731200;description=Plasmodium exported protein, unknown function;]
Pf3D7_07_v3	1345077	1345327	Pf3D7_07_v3-1345077-1345327	250	+	NA
Pf3D7_07_v3	1345430	1345630	Pf3D7_07_v3-1345430-1345630	200	+	NA
Pf3D7_07_v3	1345700	1345900	Pf3D7_07_v3-1345700-1345900	200	+	NA
Pf3D7_07_v3	1345998	1346498	Pf3D7_07_v3-1345998-1346498	500	+	NA
Pf3D7_07_v3	1346836	1347136	Pf3D7_07_v3-1346836-1347136	300	+	NA
Pf3D7_07_v3	1346836	1347139	Pf3D7_07_v3-1346836-1347139	303	+	NA
Pf3D7_07_v3	1347337	1347737	Pf3D7_07_v3-1347337-1347737	400	+	NA
Pf3D7_07_v3	1347337	1347761	Pf3D7_07_v3-1347337-1347761	424	+	NA
Pf3D7_07_v3	1347963	1348463	Pf3D7_07_v3-1347963-1348463	500	+	NA
Pf3D7_07_v3	1347963	1348466	Pf3D7_07_v3-1347963-1348466	503	+	NA
Pf3D7_07_v3	1348519	1348637	Pf3D7_07_v3-1348519-1348637	118	+	NA
Pf3D7_07_v3	1349579	1349767	Pf3D7_07_v3-1349579-1349767	188	+	NA
Pf3D7_07_v3	1350012	1350156	Pf3D7_07_v3-1350012-1350156	144	+	[ID=PF3D7_0731300;description=Plasmodium exported protein (PHISTb), unknown function;]
Pf3D7_07_v3	1350281	1351081	Pf3D7_07_v3-1350281-1351081	800	+	[ID=PF3D7_0731300;description=Plasmodium exported protein (PHISTb), unknown function;]
Pf3D7_07_v3	1350281	1351120	Pf3D7_07_v3-1350281-1351120	839	+	[ID=PF3D7_0731300;description=Plasmodium exported protein (PHISTb), unknown function;]
Pf3D7_07_v3	1351215	1351395	Pf3D7_07_v3-1351215-1351395	180	+	NA
Pf3D7_07_v3	1351451	1351600	Pf3D7_07_v3-1351451-1351600	149	+	NA
Pf3D7_07_v3	1352430	1352603	Pf3D7_07_v3-1352430-1352603	173	+	NA
Pf3D7_07_v3	1352787	1352987	Pf3D7_07_v3-1352787-1352987	200	+	NA
Pf3D7_07_v3	1352787	1352990	Pf3D7_07_v3-1352787-1352990	203	+	NA
Pf3D7_07_v3	1353510	1353619	Pf3D7_07_v3-1353510-1353619	109	+	NA
Pf3D7_07_v3	1353710	1354360	Pf3D7_07_v3-1353710-1354360	650	+	[ID=PF3D7_0731400;description=serine/threonine protein kinase, FIKK family, pseudogene;]
Pf3D7_07_v3	1353710	1355296	Pf3D7_07_v3-1353710-1355296	1586	+	[ID=PF3D7_0731400;description=serine/threonine protein kinase, FIKK family, pseudogene;]
Pf3D7_07_v3	1354510	1354760	Pf3D7_07_v3-1354510-1354760	250	+	[ID=PF3D7_0731400;description=serine/threonine protein kinase, FIKK family, pseudogene;]
Pf3D7_07_v3	1354860	1355110	Pf3D7_07_v3-1354860-1355110	250	+	[ID=PF3D7_0731400;description=serine/threonine protein kinase, FIKK family, pseudogene;]
Pf3D7_07_v3	1355404	1355569	Pf3D7_07_v3-1355404-1355569	165	+	[ID=PF3D7_0731400;description=serine/threonine protein kinase, FIKK family, pseudogene;]
Pf3D7_07_v3	1355635	1355932	Pf3D7_07_v3-1355635-1355932	297	+	NA
Pf3D7_07_v3	1356242	1356384	Pf3D7_07_v3-1356242-1356384	142	+	NA
Pf3D7_07_v3	1357375	1357503	Pf3D7_07_v3-1357375-1357503	128	+	NA
Pf3D7_07_v3	1357696	1357863	Pf3D7_07_v3-1357696-1357863	167	+	NA
Pf3D7_07_v3	1358039	1360364	Pf3D7_07_v3-1358039-1360364	2325	+	[ID=PF3D7_0731500;description=erythrocyte binding antigen-175;]
Pf3D7_07_v3	1358039	1360389	Pf3D7_07_v3-1358039-1360389	2350	+	[ID=PF3D7_0731500;description=erythrocyte binding antigen-175;]
Pf3D7_07_v3	1360439	1360739	Pf3D7_07_v3-1360439-1360739	300	+	[ID=PF3D7_0731500;description=erythrocyte binding antigen-175;]
Pf3D7_07_v3	1360789	1362539	Pf3D7_07_v3-1360789-1362539	1750	+	[ID=PF3D7_0731500;description=erythrocyte binding antigen-175;]
Pf3D7_07_v3	1361264	1362548	Pf3D7_07_v3-1361264-1362548	1284	+	[ID=PF3D7_0731500;description=erythrocyte binding antigen-175;]
Pf3D7_07_v3	1362630	1362811	Pf3D7_07_v3-1362630-1362811	181	+	[ID=PF3D7_0731500;description=erythrocyte binding antigen-175;]
Pf3D7_07_v3	1362863	1363063	Pf3D7_07_v3-1362863-1363063	200	+	[ID=PF3D7_0731500;description=erythrocyte binding antigen-175;]
Pf3D7_07_v3	1362863	1363098	Pf3D7_07_v3-1362863-1363098	235	+	[ID=PF3D7_0731500;description=erythrocyte binding antigen-175;]
Pf3D7_07_v3	1363153	1363297	Pf3D7_07_v3-1363153-1363297	144	+	NA
Pf3D7_07_v3	1363690	1363890	Pf3D7_07_v3-1363690-1363890	200	+	NA
Pf3D7_07_v3	1363690	1363905	Pf3D7_07_v3-1363690-1363905	215	+	NA
Pf3D7_07_v3	1363960	1364071	Pf3D7_07_v3-1363960-1364071	111	+	NA
Pf3D7_07_v3	1364124	1364474	Pf3D7_07_v3-1364124-1364474	350	+	NA
Pf3D7_07_v3	1364124	1364510	Pf3D7_07_v3-1364124-1364510	386	+	NA
Pf3D7_07_v3	1364569	1364689	Pf3D7_07_v3-1364569-1364689	120	+	NA
Pf3D7_07_v3	1364751	1364951	Pf3D7_07_v3-1364751-1364951	200	+	NA
Pf3D7_07_v3	1364751	1364980	Pf3D7_07_v3-1364751-1364980	229	+	NA
Pf3D7_07_v3	1365069	1365269	Pf3D7_07_v3-1365069-1365269	200	+	NA
Pf3D7_07_v3	1365069	1365314	Pf3D7_07_v3-1365069-1365314	245	+	NA
Pf3D7_07_v3	1365582	1365932	Pf3D7_07_v3-1365582-1365932	350	+	NA
Pf3D7_07_v3	1365582	1365953	Pf3D7_07_v3-1365582-1365953	371	+	NA
Pf3D7_07_v3	1366160	1366510	Pf3D7_07_v3-1366160-1366510	350	+	NA
Pf3D7_07_v3	1366160	1366516	Pf3D7_07_v3-1366160-1366516	356	+	NA
Pf3D7_07_v3	1367032	1367282	Pf3D7_07_v3-1367032-1367282	250	+	NA
Pf3D7_07_v3	1367032	1367321	Pf3D7_07_v3-1367032-1367321	289	+	NA
Pf3D7_07_v3	1368142	1370730	Pf3D7_07_v3-1368142-1370730	2588	+	[ID=PF3D7_0731600;description=acyl-CoA synthetase;]
Pf3D7_07_v3	1368792	1368992	Pf3D7_07_v3-1368792-1368992	200	+	[ID=PF3D7_0731600;description=acyl-CoA synthetase;]
Pf3D7_07_v3	1370292	1370692	Pf3D7_07_v3-1370292-1370692	400	+	[ID=PF3D7_0731600;description=acyl-CoA synthetase;]
Pf3D7_07_v3	1371335	1371806	Pf3D7_07_v3-1371335-1371806	471	+	NA
Pf3D7_07_v3	1371435	1371785	Pf3D7_07_v3-1371435-1371785	350	+	NA
Pf3D7_07_v3	1372029	1372175	Pf3D7_07_v3-1372029-1372175	146	+	[ID=PF3D7_0731700;description=Plasmodium exported protein (hyp9), unknown function;]
Pf3D7_07_v3	1372229	1372779	Pf3D7_07_v3-1372229-1372779	550	+	[ID=PF3D7_0731700;description=Plasmodium exported protein (hyp9), unknown function;]
Pf3D7_07_v3	1372229	1372854	Pf3D7_07_v3-1372229-1372854	625	+	[ID=PF3D7_0731700;description=Plasmodium exported protein (hyp9), unknown function;]
Pf3D7_07_v3	1373190	1373440	Pf3D7_07_v3-1373190-1373440	250	+	NA
Pf3D7_07_v3	1373190	1373483	Pf3D7_07_v3-1373190-1373483	293	+	NA
Pf3D7_07_v3	1373553	1373853	Pf3D7_07_v3-1373553-1373853	300	+	NA
Pf3D7_07_v3	1373553	1373856	Pf3D7_07_v3-1373553-1373856	303	+	NA
Pf3D7_07_v3	1373929	1374479	Pf3D7_07_v3-1373929-1374479	550	+	NA
Pf3D7_07_v3	1373929	1374524	Pf3D7_07_v3-1373929-1374524	595	+	NA
Pf3D7_07_v3	1374579	1375129	Pf3D7_07_v3-1374579-1375129	550	+	NA
Pf3D7_07_v3	1374579	1375169	Pf3D7_07_v3-1374579-1375169	590	+	NA
Pf3D7_07_v3	1375222	1375722	Pf3D7_07_v3-1375222-1375722	500	+	NA
Pf3D7_07_v3	1375222	1375752	Pf3D7_07_v3-1375222-1375752	530	+	NA
Pf3D7_07_v3	1375812	1376162	Pf3D7_07_v3-1375812-1376162	350	+	NA
Pf3D7_07_v3	1375812	1376165	Pf3D7_07_v3-1375812-1376165	353	+	NA
Pf3D7_07_v3	1376234	1376484	Pf3D7_07_v3-1376234-1376484	250	+	NA
Pf3D7_07_v3	1376234	1376498	Pf3D7_07_v3-1376234-1376498	264	+	NA
Pf3D7_07_v3	1376718	1376918	Pf3D7_07_v3-1376718-1376918	200	+	NA
Pf3D7_07_v3	1376718	1376938	Pf3D7_07_v3-1376718-1376938	220	+	NA
Pf3D7_07_v3	1377027	1377147	Pf3D7_07_v3-1377027-1377147	120	+	NA
Pf3D7_07_v3	1377200	1377367	Pf3D7_07_v3-1377200-1377367	167	+	NA
Pf3D7_07_v3	1378059	1378309	Pf3D7_07_v3-1378059-1378309	250	+	NA
Pf3D7_07_v3	1378059	1378352	Pf3D7_07_v3-1378059-1378352	293	+	NA
Pf3D7_07_v3	1378518	1378692	Pf3D7_07_v3-1378518-1378692	174	+	[ID=PF3D7_0731800;description=alpha/beta hydrolase, putative;]
Pf3D7_07_v3	1378811	1379111	Pf3D7_07_v3-1378811-1379111	300	+	[ID=PF3D7_0731800;description=alpha/beta hydrolase, putative;]
Pf3D7_07_v3	1378811	1380266	Pf3D7_07_v3-1378811-1380266	1455	+	[ID=PF3D7_0731800;description=alpha/beta hydrolase, putative;]
Pf3D7_07_v3	1379161	1379561	Pf3D7_07_v3-1379161-1379561	400	+	[ID=PF3D7_0731800;description=alpha/beta hydrolase, putative;]
Pf3D7_07_v3	1380011	1380211	Pf3D7_07_v3-1380011-1380211	200	+	[ID=PF3D7_0731800;description=alpha/beta hydrolase, putative;]
Pf3D7_07_v3	1380372	1380572	Pf3D7_07_v3-1380372-1380572	200	+	[ID=PF3D7_0731800;description=alpha/beta hydrolase, putative;]
Pf3D7_07_v3	1380832	1380975	Pf3D7_07_v3-1380832-1380975	143	+	NA
Pf3D7_07_v3	1381227	1381437	Pf3D7_07_v3-1381227-1381437	210	+	NA
Pf3D7_08_v3	1290239	1291029	Pf3D7_08_v3-1290239-1291029	790	+	[ID=PF3D7_0830300;description=sporozoite invasion-associated protein 2;]
Pf3D7_08_v3	1291082	1291226	Pf3D7_08_v3-1291082-1291226	144	+	[ID=PF3D7_0830300;description=sporozoite invasion-associated protein 2;]
Pf3D7_08_v3	1291288	1291390	Pf3D7_08_v3-1291288-1291390	102	+	[ID=PF3D7_0830300;description=sporozoite invasion-associated protein 2;]
Pf3D7_08_v3	1291867	1292018	Pf3D7_08_v3-1291867-1292018	151	+	NA
Pf3D7_08_v3	1292581	1292737	Pf3D7_08_v3-1292581-1292737	156	+	NA
Pf3D7_08_v3	1293185	1293289	Pf3D7_08_v3-1293185-1293289	104	+	NA
Pf3D7_08_v3	1293411	1293525	Pf3D7_08_v3-1293411-1293525	114	+	NA
Pf3D7_08_v3	1294012	1294194	Pf3D7_08_v3-1294012-1294194	182	+	[ID=PF3D7_0830400;description=CRA domain-containing protein, putative;]
Pf3D7_08_v3	1294451	1294811	Pf3D7_08_v3-1294451-1294811	360	+	[ID=PF3D7_0830400;description=CRA domain-containing protein, putative;]
Pf3D7_08_v3	1295017	1295191	Pf3D7_08_v3-1295017-1295191	174	+	NA
Pf3D7_08_v3	1295741	1295942	Pf3D7_08_v3-1295741-1295942	201	+	NA
Pf3D7_08_v3	1296070	1296284	Pf3D7_08_v3-1296070-1296284	214	+	[ID=PF3D7_0830500;description=sporozoite and liver stage tryptophan-rich protein, putative;]
Pf3D7_08_v3	1296928	1297974	Pf3D7_08_v3-1296928-1297974	1046	+	[ID=PF3D7_0830500;description=sporozoite and liver stage tryptophan-rich protein, putative;]
Pf3D7_08_v3	1298161	1298343	Pf3D7_08_v3-1298161-1298343	182	+	[ID=PF3D7_0830500;description=sporozoite and liver stage tryptophan-rich protein, putative;]
Pf3D7_08_v3	1298605	1298725	Pf3D7_08_v3-1298605-1298725	120	+	NA
Pf3D7_08_v3	1298977	1299185	Pf3D7_08_v3-1298977-1299185	208	+	NA
Pf3D7_08_v3	1300011	1300128	Pf3D7_08_v3-1300011-1300128	117	+	NA
Pf3D7_08_v3	1300204	1300334	Pf3D7_08_v3-1300204-1300334	130	+	NA
Pf3D7_08_v3	1300435	1300565	Pf3D7_08_v3-1300435-1300565	130	+	NA
Pf3D7_08_v3	1300647	1300926	Pf3D7_08_v3-1300647-1300926	279	+	NA
Pf3D7_08_v3	1301032	1301173	Pf3D7_08_v3-1301032-1301173	141	+	NA
Pf3D7_08_v3	1301806	1302067	Pf3D7_08_v3-1301806-1302067	261	+	NA
Pf3D7_08_v3	1302692	1302843	Pf3D7_08_v3-1302692-1302843	151	+	NA
Pf3D7_08_v3	1303290	1303510	Pf3D7_08_v3-1303290-1303510	220	+	[ID=PF3D7_0830600;description=Plasmodium exported protein (PHISTc), unknown function;]
Pf3D7_08_v3	1303610	1304165	Pf3D7_08_v3-1303610-1304165	555	+	[ID=PF3D7_0830600;description=Plasmodium exported protein (PHISTc), unknown function;]
Pf3D7_08_v3	1304228	1304853	Pf3D7_08_v3-1304228-1304853	625	+	[ID=PF3D7_0830600;description=Plasmodium exported protein (PHISTc), unknown function;]
Pf3D7_08_v3	1305268	1305518	Pf3D7_08_v3-1305268-1305518	250	+	NA
Pf3D7_08_v3	1305677	1305887	Pf3D7_08_v3-1305677-1305887	210	+	NA
Pf3D7_08_v3	1306386	1306510	Pf3D7_08_v3-1306386-1306510	124	+	NA
Pf3D7_08_v3	1306752	1306886	Pf3D7_08_v3-1306752-1306886	134	+	NA
Pf3D7_08_v3	1306997	1307218	Pf3D7_08_v3-1306997-1307218	221	+	[ID=PF3D7_0830700;description=Plasmodium exported protein (hyp9), unknown function;]
Pf3D7_08_v3	1307282	1307950	Pf3D7_08_v3-1307282-1307950	668	+	[ID=PF3D7_0830700;description=Plasmodium exported protein (hyp9), unknown function;]
Pf3D7_08_v3	1308384	1308616	Pf3D7_08_v3-1308384-1308616	232	+	NA
Pf3D7_08_v3	1308750	1308974	Pf3D7_08_v3-1308750-1308974	224	+	NA
Pf3D7_08_v3	1310245	1312346	Pf3D7_08_v3-1310245-1312346	2101	+	[ID=PF3D7_0830800;description=surface-associated interspersed protein 8.2 (SURFIN 8.2);]
Pf3D7_08_v3	1312523	1312761	Pf3D7_08_v3-1312523-1312761	238	+	[ID=PF3D7_0830800;description=surface-associated interspersed protein 8.2 (SURFIN 8.2);]
Pf3D7_08_v3	1312814	1313449	Pf3D7_08_v3-1312814-1313449	635	+	[ID=PF3D7_0830800;description=surface-associated interspersed protein 8.2 (SURFIN 8.2);]
Pf3D7_08_v3	1313507	1314123	Pf3D7_08_v3-1313507-1314123	616	+	[ID=PF3D7_0830800;description=surface-associated interspersed protein 8.2 (SURFIN 8.2);]
Pf3D7_08_v3	1314318	1315568	Pf3D7_08_v3-1314318-1315568	1250	+	[ID=PF3D7_0830800;description=surface-associated interspersed protein 8.2 (SURFIN 8.2);]
Pf3D7_08_v3	1315643	1316574	Pf3D7_08_v3-1315643-1316574	931	+	[ID=PF3D7_0830800;description=surface-associated interspersed protein 8.2 (SURFIN 8.2);]
Pf3D7_08_v3	1316716	1316973	Pf3D7_08_v3-1316716-1316973	257	+	[ID=PF3D7_0830800;description=surface-associated interspersed protein 8.2 (SURFIN 8.2);]
Pf3D7_08_v3	1317034	1317255	Pf3D7_08_v3-1317034-1317255	221	+	NA
Pf3D7_08_v3	1317583	1318120	Pf3D7_08_v3-1317583-1318120	537	+	[ID=PF3D7_0830900;description=Plasmodium exported protein, unknown function;]
Pf3D7_08_v3	1319675	1320050	Pf3D7_08_v3-1319675-1320050	375	+	NA
Pf3D7_08_v3	1320410	1320598	Pf3D7_08_v3-1320410-1320598	188	+	NA
Pf3D7_08_v3	1320896	1321055	Pf3D7_08_v3-1320896-1321055	159	+	NA
Pf3D7_08_v3	1321395	1321648	Pf3D7_08_v3-1321395-1321648	253	+	[ID=PF3D7_0831000;description=Plasmodium exported protein (PHISTb), unknown function;]
Pf3D7_08_v3	1321769	1322848	Pf3D7_08_v3-1321769-1322848	1079	+	[ID=PF3D7_0831000;description=Plasmodium exported protein (PHISTb), unknown function;]
Pf3D7_08_v3	1323153	1323391	Pf3D7_08_v3-1323153-1323391	238	+	NA
Pf3D7_08_v3	1323504	1323774	Pf3D7_08_v3-1323504-1323774	270	+	NA
Pf3D7_08_v3	1324047	1324424	Pf3D7_08_v3-1324047-1324424	377	+	NA
Pf3D7_08_v3	1324711	1324957	Pf3D7_08_v3-1324711-1324957	246	+	NA
Pf3D7_08_v3	1325095	1326045	Pf3D7_08_v3-1325095-1326045	950	+	[ID=PF3D7_0831100;description=surface-associated interspersed protein 8.1 (SURFIN 8.1);]
Pf3D7_08_v3	1326154	1326418	Pf3D7_08_v3-1326154-1326418	264	+	[ID=PF3D7_0831100;description=surface-associated interspersed protein 8.1 (SURFIN 8.1);]
Pf3D7_08_v3	1326518	1326718	Pf3D7_08_v3-1326518-1326718	200	+	[ID=PF3D7_0831100;description=surface-associated interspersed protein 8.1 (SURFIN 8.1);]
Pf3D7_08_v3	1330127	1331200	Pf3D7_08_v3-1330127-1331200	1073	+	[ID=PF3D7_0831100;description=surface-associated interspersed protein 8.1 (SURFIN 8.1);]
Pf3D7_08_v3	1331434	1331559	Pf3D7_08_v3-1331434-1331559	125	+	NA
Pf3D7_08_v3	1331753	1331898	Pf3D7_08_v3-1331753-1331898	145	+	NA
Pf3D7_08_v3	1332030	1332158	Pf3D7_08_v3-1332030-1332158	128	+	NA
Pf3D7_08_v3	1332946	1333428	Pf3D7_08_v3-1332946-1333428	482	+	[ID=PF3D7_0831200;description=DnaJ protein, putative;]
Pf3D7_08_v3	1333539	1334585	Pf3D7_08_v3-1333539-1334585	1046	+	[ID=PF3D7_0831200;description=DnaJ protein, putative;]
Pf3D7_08_v3	1334854	1336312	Pf3D7_08_v3-1334854-1336312	1458	+	[ID=PF3D7_0831200;description=DnaJ protein, putative;]
Pf3D7_08_v3	1336612	1336778	Pf3D7_08_v3-1336612-1336778	166	+	NA
Pf3D7_08_v3	1336952	1337141	Pf3D7_08_v3-1336952-1337141	189	+	NA
Pf3D7_08_v3	1337324	1337547	Pf3D7_08_v3-1337324-1337547	223	+	NA
Pf3D7_08_v3	1337744	1337894	Pf3D7_08_v3-1337744-1337894	150	+	NA
Pf3D7_08_v3	1338054	1338180	Pf3D7_08_v3-1338054-1338180	126	+	NA
Pf3D7_08_v3	1338252	1338542	Pf3D7_08_v3-1338252-1338542	290	+	NA
Pf3D7_08_v3	1338611	1338903	Pf3D7_08_v3-1338611-1338903	292	+	NA
Pf3D7_08_v3	1339008	1339222	Pf3D7_08_v3-1339008-1339222	214	+	NA
Pf3D7_08_v3	1339298	1339554	Pf3D7_08_v3-1339298-1339554	256	+	NA
Pf3D7_08_v3	1339888	1340213	Pf3D7_08_v3-1339888-1340213	325	+	[ID=PF3D7_0831300;description=Plasmodium exported protein, unknown function;]
Pf3D7_08_v3	1340732	1340926	Pf3D7_08_v3-1340732-1340926	194	+	[ID=PF3D7_0831300;description=Plasmodium exported protein, unknown function;]
Pf3D7_08_v3	1340978	1342288	Pf3D7_08_v3-1340978-1342288	1310	+	[ID=PF3D7_0831300;description=Plasmodium exported protein, unknown function;]
Pf3D7_08_v3	1342672	1342892	Pf3D7_08_v3-1342672-1342892	220	+	NA
Pf3D7_08_v3	1342958	1343190	Pf3D7_08_v3-1342958-1343190	232	+	NA
Pf3D7_08_v3	1343588	1344029	Pf3D7_08_v3-1343588-1344029	441	+	NA
Pf3D7_08_v3	1344099	1344215	Pf3D7_08_v3-1344099-1344215	116	+	NA
Pf3D7_08_v3	1344423	1344973	Pf3D7_08_v3-1344423-1344973	550	+	[ID=PF3D7_0831400;description=Plasmodium exported protein, unknown function;]
Pf3D7_08_v3	1345120	1345336	Pf3D7_08_v3-1345120-1345336	216	+	[ID=PF3D7_0831400;description=Plasmodium exported protein, unknown function;]
Pf3D7_08_v3	1345700	1345909	Pf3D7_08_v3-1345700-1345909	209	+	NA
Pf3D7_08_v3	1346003	1346262	Pf3D7_08_v3-1346003-1346262	259	+	NA
Pf3D7_08_v3	1346327	1346682	Pf3D7_08_v3-1346327-1346682	355	+	NA
Pf3D7_08_v3	1347157	1347351	Pf3D7_08_v3-1347157-1347351	194	+	NA
Pf3D7_08_v3	1347612	1347948	Pf3D7_08_v3-1347612-1347948	336	+	NA
Pf3D7_08_v3	1348026	1348138	Pf3D7_08_v3-1348026-1348138	112	+	NA
Pf3D7_08_v3	1348247	1348386	Pf3D7_08_v3-1348247-1348386	139	+	NA
Pf3D7_08_v3	1348582	1348772	Pf3D7_08_v3-1348582-1348772	190	+	NA
Pf3D7_08_v3	1348941	1349141	Pf3D7_08_v3-1348941-1349141	200	+	NA
Pf3D7_08_v3	1349264	1349368	Pf3D7_08_v3-1349264-1349368	104	+	NA
Pf3D7_08_v3	1349495	1349619	Pf3D7_08_v3-1349495-1349619	124	+	NA
Pf3D7_08_v3	1349688	1350091	Pf3D7_08_v3-1349688-1350091	403	+	NA
Pf3D7_08_v3	1350165	1350340	Pf3D7_08_v3-1350165-1350340	175	+	NA
Pf3D7_08_v3	1350560	1350740	Pf3D7_08_v3-1350560-1350740	180	+	NA
Pf3D7_08_v3	1350806	1351113	Pf3D7_08_v3-1350806-1351113	307	+	NA
Pf3D7_08_v3	1351309	1351479	Pf3D7_08_v3-1351309-1351479	170	+	NA
Pf3D7_08_v3	1351787	1351991	Pf3D7_08_v3-1351787-1351991	204	+	NA
Pf3D7_08_v3	1352550	1352761	Pf3D7_08_v3-1352550-1352761	211	+	NA
Pf3D7_08_v3	1353413	1353701	Pf3D7_08_v3-1353413-1353701	288	+	[ID=PF3D7_0831500;description=Plasmodium exported protein (PHIST), unknown function;]
Pf3D7_08_v3	1353852	1354043	Pf3D7_08_v3-1353852-1354043	191	+	[ID=PF3D7_0831500;description=Plasmodium exported protein (PHIST), unknown function;]
Pf3D7_08_v3	1354152	1354774	Pf3D7_08_v3-1354152-1354774	622	+	[ID=PF3D7_0831500;description=Plasmodium exported protein (PHIST), unknown function;]
Pf3D7_08_v3	1355268	1355429	Pf3D7_08_v3-1355268-1355429	161	+	NA
Pf3D7_08_v3	1355892	1356295	Pf3D7_08_v3-1355892-1356295	403	+	NA
Pf3D7_08_v3	1356353	1356527	Pf3D7_08_v3-1356353-1356527	174	+	NA
Pf3D7_08_v3	1356735	1357005	Pf3D7_08_v3-1356735-1357005	270	+	NA
Pf3D7_08_v3	1357247	1357437	Pf3D7_08_v3-1357247-1357437	190	+	NA
Pf3D7_08_v3	1358219	1359148	Pf3D7_08_v3-1358219-1359148	929	+	[ID=PF3D7_0831600;description=cytoadherence linked asexual protein 8;]
Pf3D7_08_v3	1359297	1359841	Pf3D7_08_v3-1359297-1359841	544	+	[ID=PF3D7_0831600;description=cytoadherence linked asexual protein 8;]
Pf3D7_08_v3	1360120	1360269	Pf3D7_08_v3-1360120-1360269	149	+	[ID=PF3D7_0831600;description=cytoadherence linked asexual protein 8;]
Pf3D7_08_v3	1360332	1360516	Pf3D7_08_v3-1360332-1360516	184	+	[ID=PF3D7_0831600;description=cytoadherence linked asexual protein 8;]
Pf3D7_08_v3	1360640	1360860	Pf3D7_08_v3-1360640-1360860	220	+	[ID=PF3D7_0831600;description=cytoadherence linked asexual protein 8;]
Pf3D7_08_v3	1360915	1361124	Pf3D7_08_v3-1360915-1361124	209	+	[ID=PF3D7_0831600;description=cytoadherence linked asexual protein 8;]
Pf3D7_08_v3	1362900	1363100	Pf3D7_08_v3-1362900-1363100	200	+	[ID=PF3D7_0831600;description=cytoadherence linked asexual protein 8;]
Pf3D7_08_v3	1364774	1364998	Pf3D7_08_v3-1364774-1364998	224	+	NA
Pf3D7_08_v3	1365095	1365209	Pf3D7_08_v3-1365095-1365209	114	+	NA
Pf3D7_08_v3	1365360	1367552	Pf3D7_08_v3-1365360-1367552	2192	+	[ID=PF3D7_0831700;description=heat shock protein 70;]
Pf3D7_08_v3	1368030	1368389	Pf3D7_08_v3-1368030-1368389	359	+	NA
Pf3D7_08_v3	1369030	1369174	Pf3D7_08_v3-1369030-1369174	144	+	NA
Pf3D7_08_v3	1369257	1369452	Pf3D7_08_v3-1369257-1369452	195	+	NA
Pf3D7_08_v3	1369504	1369859	Pf3D7_08_v3-1369504-1369859	355	+	NA
Pf3D7_08_v3	1369924	1370136	Pf3D7_08_v3-1369924-1370136	212	+	NA
Pf3D7_08_v3	1370693	1371132	Pf3D7_08_v3-1370693-1371132	439	+	NA
Pf3D7_08_v3	1371201	1371655	Pf3D7_08_v3-1371201-1371655	454	+	NA
Pf3D7_08_v3	1371717	1372083	Pf3D7_08_v3-1371717-1372083	366	+	[ID=PF3D7_0831750;description=Plasmodium exported protein (PHISTa), unknown function, pseudogene;]
Pf3D7_08_v3	1372144	1372449	Pf3D7_08_v3-1372144-1372449	305	+	[ID=PF3D7_0831750;description=Plasmodium exported protein (PHISTa), unknown function, pseudogene;]
Pf3D7_08_v3	1372507	1372701	Pf3D7_08_v3-1372507-1372701	194	+	[ID=PF3D7_0831750;description=Plasmodium exported protein (PHISTa), unknown function, pseudogene;]
Pf3D7_08_v3	1372824	1372980	Pf3D7_08_v3-1372824-1372980	156	+	NA
Pf3D7_08_v3	1373043	1373302	Pf3D7_08_v3-1373043-1373302	259	+	NA
Pf3D7_08_v3	1373484	1373603	Pf3D7_08_v3-1373484-1373603	119	+	NA
Pf3D7_08_v3	1373685	1374232	Pf3D7_08_v3-1373685-1374232	547	+	NA
Pf3D7_08_v3	1373935	1374035	Pf3D7_08_v3-1373935-1374035	100	+	NA
Pf3D7_08_v3	1373935	1374235	Pf3D7_08_v3-1373935-1374235	300	+	NA
Pf3D7_08_v3	1373960	1374110	Pf3D7_08_v3-1373960-1374110	150	+	NA
Pf3D7_08_v3	1373960	1374160	Pf3D7_08_v3-1373960-1374160	200	+	NA
Pf3D7_08_v3	1374035	1374110	Pf3D7_08_v3-1374035-1374110	75	+	NA
Pf3D7_08_v3	1374085	1374185	Pf3D7_08_v3-1374085-1374185	100	+	NA
Pf3D7_08_v3	1374135	1374210	Pf3D7_08_v3-1374135-1374210	75	+	NA
Pf3D7_08_v3	1374135	1374285	Pf3D7_08_v3-1374135-1374285	150	+	[ID=PF3D7_0831800;description=histidine-rich protein II;]
Pf3D7_08_v3	1374185	1374285	Pf3D7_08_v3-1374185-1374285	100	+	[ID=PF3D7_0831800;description=histidine-rich protein II;]
Pf3D7_08_v3	1374210	1374285	Pf3D7_08_v3-1374210-1374285	75	+	[ID=PF3D7_0831800;description=histidine-rich protein II;]
Pf3D7_08_v3	1375010	1375085	Pf3D7_08_v3-1375010-1375085	75	+	[ID=PF3D7_0831800;description=histidine-rich protein II;]
Pf3D7_08_v3	1375010	1375110	Pf3D7_08_v3-1375010-1375110	100	+	[ID=PF3D7_0831800;description=histidine-rich protein II;]
Pf3D7_08_v3	1375185	1375260	Pf3D7_08_v3-1375185-1375260	75	+	[ID=PF3D7_0831800;description=histidine-rich protein II;]
Pf3D7_08_v3	1375185	1375485	Pf3D7_08_v3-1375185-1375485	300	+	[ID=PF3D7_0831800;description=histidine-rich protein II;]
Pf3D7_08_v3	1375207	1375341	Pf3D7_08_v3-1375207-1375341	134	+	[ID=PF3D7_0831800;description=histidine-rich protein II;]
Pf3D7_08_v3	1375210	1375410	Pf3D7_08_v3-1375210-1375410	200	+	[ID=PF3D7_0831800;description=histidine-rich protein II;]
Pf3D7_08_v3	1375235	1375335	Pf3D7_08_v3-1375235-1375335	100	+	[ID=PF3D7_0831800;description=histidine-rich protein II;]
Pf3D7_08_v3	1375235	1375385	Pf3D7_08_v3-1375235-1375385	150	+	[ID=PF3D7_0831800;description=histidine-rich protein II;]
Pf3D7_08_v3	1375260	1375335	Pf3D7_08_v3-1375260-1375335	75	+	[ID=PF3D7_0831800;description=histidine-rich protein II;]
Pf3D7_08_v3	1375335	1375410	Pf3D7_08_v3-1375335-1375410	75	+	NA
Pf3D7_08_v3	1375335	1375435	Pf3D7_08_v3-1375335-1375435	100	+	NA
Pf3D7_08_v3	1375410	1375485	Pf3D7_08_v3-1375410-1375485	75	+	NA
Pf3D7_08_v3	1375557	1375750	Pf3D7_08_v3-1375557-1375750	193	+	NA
Pf3D7_08_v3	1378006	1378662	Pf3D7_08_v3-1378006-1378662	656	+	NA
Pf3D7_08_v3	1379154	1379915	Pf3D7_08_v3-1379154-1379915	761	+	NA
Pf3D7_08_v3	1380194	1380328	Pf3D7_08_v3-1380194-1380328	134	+	NA
Pf3D7_08_v3	1382255	1382505	Pf3D7_08_v3-1382255-1382505	250	+	NA
Pf3D7_08_v3	1382680	1383155	Pf3D7_08_v3-1382680-1383155	475	+	NA
Pf3D7_08_v3	1384030	1384251	Pf3D7_08_v3-1384030-1384251	221	+	[ID=PF3D7_0832000;description=stevor;]
Pf3D7_08_v3	1384316	1384663	Pf3D7_08_v3-1384316-1384663	347	+	[ID=PF3D7_0832000;description=stevor;]
Pf3D7_08_v3	1384837	1385370	Pf3D7_08_v3-1384837-1385370	533	+	NA
Pf3D7_08_v3	1385625	1385741	Pf3D7_08_v3-1385625-1385741	116	+	NA
Pf3D7_08_v3	1385951	1386323	Pf3D7_08_v3-1385951-1386323	372	+	NA
Pf3D7_08_v3	1386518	1386680	Pf3D7_08_v3-1386518-1386680	162	+	[ID=PF3D7_0832100;description=rifin, pseudogene;]
Pf3D7_08_v3	1386739	1387414	Pf3D7_08_v3-1386739-1387414	675	+	[ID=PF3D7_0832100;description=rifin, pseudogene;]
Pf3D7_08_v3	1387782	1387982	Pf3D7_08_v3-1387782-1387982	200	+	[ID=PF3D7_0832100;description=rifin, pseudogene;]
Pf3D7_11_v3	1897151	1897313	Pf3D7_11_v3-1897151-1897313	162	+	[ID=PF3D7_1147700;description=ATP synthase subunit delta, mitochondrial, putative;]
Pf3D7_11_v3	1897417	1897698	Pf3D7_11_v3-1897417-1897698	281	+	[ID=PF3D7_1147700;description=ATP synthase subunit delta, mitochondrial, putative;]
Pf3D7_11_v3	1897860	1898046	Pf3D7_11_v3-1897860-1898046	186	+	[ID=PF3D7_1147700;description=ATP synthase subunit delta, mitochondrial, putative;]
Pf3D7_11_v3	1898329	1898682	Pf3D7_11_v3-1898329-1898682	353	+	NA
Pf3D7_11_v3	1898872	1899075	Pf3D7_11_v3-1898872-1899075	203	+	NA
Pf3D7_11_v3	1899153	1899353	Pf3D7_11_v3-1899153-1899353	200	+	[ID=PF3D7_1147800;description=membrane associated erythrocyte binding-like protein;]
Pf3D7_11_v3	1899619	1902700	Pf3D7_11_v3-1899619-1902700	3081	+	[ID=PF3D7_1147800;description=membrane associated erythrocyte binding-like protein;]
Pf3D7_11_v3	1904667	1905517	Pf3D7_11_v3-1904667-1905517	850	+	[ID=PF3D7_1147800;description=membrane associated erythrocyte binding-like protein;]
Pf3D7_11_v3	1905791	1905992	Pf3D7_11_v3-1905791-1905992	201	+	[ID=PF3D7_1147800;description=membrane associated erythrocyte binding-like protein;]
Pf3D7_11_v3	1906081	1906273	Pf3D7_11_v3-1906081-1906273	192	+	NA
Pf3D7_11_v3	1906333	1906532	Pf3D7_11_v3-1906333-1906532	199	+	NA
Pf3D7_11_v3	1906655	1906771	Pf3D7_11_v3-1906655-1906771	116	+	NA
Pf3D7_11_v3	1906979	1907712	Pf3D7_11_v3-1906979-1907712	733	+	[ID=PF3D7_1147900;description=peroxisome assembly protein 22, putative;]
Pf3D7_11_v3	1908233	1908401	Pf3D7_11_v3-1908233-1908401	168	+	NA
Pf3D7_11_v3	1909223	1910606	Pf3D7_11_v3-1909223-1910606	1383	+	[ID=PF3D7_1148000;description=serine/threonine protein kinase, putative;]
Pf3D7_11_v3	1910764	1910881	Pf3D7_11_v3-1910764-1910881	117	+	[ID=PF3D7_1148000;description=serine/threonine protein kinase, putative;]
Pf3D7_11_v3	1910937	1911190	Pf3D7_11_v3-1910937-1911190	253	+	[ID=PF3D7_1148000;description=serine/threonine protein kinase, putative;]
Pf3D7_11_v3	1911251	1913531	Pf3D7_11_v3-1911251-1913531	2280	+	[ID=PF3D7_1148000;description=serine/threonine protein kinase, putative;]
Pf3D7_11_v3	1914031	1914179	Pf3D7_11_v3-1914031-1914179	148	+	NA
Pf3D7_11_v3	1914528	1914746	Pf3D7_11_v3-1914528-1914746	218	+	NA
Pf3D7_11_v3	1914970	1915273	Pf3D7_11_v3-1914970-1915273	303	+	NA
Pf3D7_11_v3	1915412	1915541	Pf3D7_11_v3-1915412-1915541	129	+	NA
Pf3D7_11_v3	1915681	1915920	Pf3D7_11_v3-1915681-1915920	239	+	NA
Pf3D7_11_v3	1916004	1916166	Pf3D7_11_v3-1916004-1916166	162	+	NA
Pf3D7_11_v3	1916479	1917600	Pf3D7_11_v3-1916479-1917600	1121	+	[ID=PF3D7_1148100;description=unspecified product;]
Pf3D7_11_v3	1917669	1917838	Pf3D7_11_v3-1917669-1917838	169	+	[ID=PF3D7_1148100;description=unspecified product;]
Pf3D7_11_v3	1918030	1918255	Pf3D7_11_v3-1918030-1918255-for	225	+	[ID=PF3D7_1148100;description=unspecified product;]
Pf3D7_11_v3	1918371	1918571	Pf3D7_11_v3-1918371-1918571-for	200	+	NA
Pf3D7_11_v3	1918601	1918787	Pf3D7_11_v3-1918601-1918787-for	186	+	NA
Pf3D7_11_v3	1918859	1919019	Pf3D7_11_v3-1918859-1919019-for	160	+	NA
Pf3D7_11_v3	1919059	1919606	Pf3D7_11_v3-1919059-1919606-for	547	+	NA
Pf3D7_11_v3	1919633	1920323	Pf3D7_11_v3-1919633-1920323-for	690	+	[ID=PF3D7_1148200;description=unspecified product;]
Pf3D7_11_v3	1920483	1921173	Pf3D7_11_v3-1920483-1921173-for	690	+	[ID=PF3D7_1148200;description=unspecified product;]
Pf3D7_11_v3	1921274	1921931	Pf3D7_11_v3-1921274-1921931-for	657	+	NA
Pf3D7_11_v3	1922418	1922669	Pf3D7_11_v3-1922418-1922669-for	251	+	[ID=PF3D7_1148500;description=unspecified product;]
Pf3D7_11_v3	1923111	1923459	Pf3D7_11_v3-1923111-1923459-for	348	+	NA
Pf3D7_11_v3	1923887	1923972	Pf3D7_11_v3-1923887-1923972-for	85	+	NA
Pf3D7_11_v3	1923977	1924157	Pf3D7_11_v3-1923977-1924157-for	180	+	NA
Pf3D7_11_v3	1924207	1924257	Pf3D7_11_v3-1924207-1924257-for	50	+	NA
Pf3D7_11_v3	1924423	1924594	Pf3D7_11_v3-1924423-1924594-for	171	+	NA
Pf3D7_11_v3	1924644	1925425	Pf3D7_11_v3-1924644-1925425-for	781	+	NA
Pf3D7_11_v3	1925455	1925667	Pf3D7_11_v3-1925455-1925667-for	212	+	NA
Pf3D7_11_v3	1925739	1926009	Pf3D7_11_v3-1925739-1926009-for	270	+	[ID=PF3D7_1148600;description=18S ribosomal RNA;]
Pf3D7_11_v3	1926259	1926334	Pf3D7_11_v3-1926259-1926334-for	75	+	[ID=PF3D7_1148600;description=18S ribosomal RNA;]
Pf3D7_11_v3	1927549	1927649	Pf3D7_11_v3-1927549-1927649-for	100	+	[ID=PF3D7_1148600;description=18S ribosomal RNA;]
Pf3D7_11_v3	1928119	1928619	Pf3D7_11_v3-1928119-1928619-for	500	+	[ID=PF3D7_1148600;description=18S ribosomal RNA;],[ID=PF3D7_1148620;description=5.8S ribosomal RNA;]
Pf3D7_11_v3	1928119	1930229	Pf3D7_11_v3-1928119-1930229-for	2110	+	[ID=PF3D7_1148600;description=18S ribosomal RNA;],[ID=PF3D7_1148620;description=5.8S ribosomal RNA;],[ID=PF3D7_1148640;description=28S ribosomal RNA;]
Pf3D7_11_v3	1928369	1928869	Pf3D7_11_v3-1928369-1928869-for	500	+	[ID=PF3D7_1148620;description=5.8S ribosomal RNA;]
Pf3D7_11_v3	1928619	1929119	Pf3D7_11_v3-1928619-1929119-for	500	+	[ID=PF3D7_1148620;description=5.8S ribosomal RNA;],[ID=PF3D7_1148640;description=28S ribosomal RNA;]
Pf3D7_11_v3	1928869	1929369	Pf3D7_11_v3-1928869-1929369-for	500	+	[ID=PF3D7_1148640;description=28S ribosomal RNA;]
Pf3D7_11_v3	1929119	1929619	Pf3D7_11_v3-1929119-1929619-for	500	+	[ID=PF3D7_1148640;description=28S ribosomal RNA;]
Pf3D7_11_v3	1929369	1929869	Pf3D7_11_v3-1929369-1929869-for	500	+	[ID=PF3D7_1148640;description=28S ribosomal RNA;]
Pf3D7_11_v3	1929619	1930119	Pf3D7_11_v3-1929619-1930119-for	500	+	[ID=PF3D7_1148640;description=28S ribosomal RNA;]
Pf3D7_11_v3	1930269	1930349	Pf3D7_11_v3-1930269-1930349-for	80	+	[ID=PF3D7_1148640;description=28S ribosomal RNA;]
Pf3D7_11_v3	1930369	1930444	Pf3D7_11_v3-1930369-1930444-for	75	+	[ID=PF3D7_1148640;description=28S ribosomal RNA;]
Pf3D7_11_v3	1930879	1931429	Pf3D7_11_v3-1930879-1931429-for	550	+	[ID=PF3D7_1148640;description=28S ribosomal RNA;]
Pf3D7_11_v3	1931459	1931669	Pf3D7_11_v3-1931459-1931669-for	210	+	[ID=PF3D7_1148640;description=28S ribosomal RNA;]
Pf3D7_11_v3	1931929	1932229	Pf3D7_11_v3-1931929-1932229-for	300	+	[ID=PF3D7_1148640;description=28S ribosomal RNA;]
Pf3D7_11_v3	1932379	1932509	Pf3D7_11_v3-1932379-1932509-for	130	+	[ID=PF3D7_1148640;description=28S ribosomal RNA;]
Pf3D7_11_v3	1932629	1932704	Pf3D7_11_v3-1932629-1932704-for	75	+	[ID=PF3D7_1148640;description=28S ribosomal RNA;]
Pf3D7_11_v3	1932729	1933165	Pf3D7_11_v3-1932729-1933165-for	436	+	[ID=PF3D7_1148640;description=28S ribosomal RNA;]
Pf3D7_11_v3	1933209	1933379	Pf3D7_11_v3-1933209-1933379-for	170	+	NA
Pf3D7_11_v3	1933507	1933682	Pf3D7_11_v3-1933507-1933682	175	+	NA
Pf3D7_11_v3	1933885	1934187	Pf3D7_11_v3-1933885-1934187	302	+	NA
Pf3D7_11_v3	1934272	1934423	Pf3D7_11_v3-1934272-1934423	151	+	[ID=PF3D7_1148700;description=Plasmodium exported protein (PHISTc), unknown function;]
Pf3D7_11_v3	1934722	1935377	Pf3D7_11_v3-1934722-1935377	655	+	[ID=PF3D7_1148700;description=Plasmodium exported protein (PHISTc), unknown function;]
Pf3D7_11_v3	1936069	1936233	Pf3D7_11_v3-1936069-1936233	164	+	NA
Pf3D7_11_v3	1937320	1937658	Pf3D7_11_v3-1937320-1937658	338	+	NA
Pf3D7_11_v3	1938027	1938440	Pf3D7_11_v3-1938027-1938440	413	+	NA
Pf3D7_11_v3	1938533	1938985	Pf3D7_11_v3-1938533-1938985	452	+	NA
Pf3D7_11_v3	1939099	1939353	Pf3D7_11_v3-1939099-1939353	254	+	NA
Pf3D7_11_v3	1939422	1939703	Pf3D7_11_v3-1939422-1939703	281	+	NA
Pf3D7_11_v3	1939801	1939969	Pf3D7_11_v3-1939801-1939969	168	+	NA
Pf3D7_11_v3	1940027	1940180	Pf3D7_11_v3-1940027-1940180	153	+	NA
Pf3D7_11_v3	1940531	1940868	Pf3D7_11_v3-1940531-1940868	337	+	NA
Pf3D7_11_v3	1940970	1941110	Pf3D7_11_v3-1940970-1941110	140	+	NA
Pf3D7_11_v3	1941213	1941582	Pf3D7_11_v3-1941213-1941582	369	+	[ID=PF3D7_1148800;description=Plasmodium exported protein (hyp11), unknown function;]
Pf3D7_11_v3	1941639	1941888	Pf3D7_11_v3-1941639-1941888	249	+	[ID=PF3D7_1148800;description=Plasmodium exported protein (hyp11), unknown function;]
Pf3D7_11_v3	1942193	1942604	Pf3D7_11_v3-1942193-1942604	411	+	[ID=PF3D7_1148800;description=Plasmodium exported protein (hyp11), unknown function;]
Pf3D7_11_v3	1942998	1943204	Pf3D7_11_v3-1942998-1943204	206	+	NA
Pf3D7_11_v3	1943307	1943630	Pf3D7_11_v3-1943307-1943630	323	+	NA
Pf3D7_11_v3	1943794	1944288	Pf3D7_11_v3-1943794-1944288	494	+	NA
Pf3D7_11_v3	1944809	1944974	Pf3D7_11_v3-1944809-1944974	165	+	NA
Pf3D7_11_v3	1945512	1946274	Pf3D7_11_v3-1945512-1946274	762	+	[ID=PF3D7_1148900;description=Plasmodium exported protein, unknown function;]
Pf3D7_11_v3	1946938	1947210	Pf3D7_11_v3-1946938-1947210	272	+	NA
Pf3D7_11_v3	1947464	1947696	Pf3D7_11_v3-1947464-1947696	232	+	NA
Pf3D7_11_v3	1947997	1948276	Pf3D7_11_v3-1947997-1948276	279	+	NA
Pf3D7_11_v3	1949620	1949830	Pf3D7_11_v3-1949620-1949830	210	+	NA
Pf3D7_11_v3	1949889	1950094	Pf3D7_11_v3-1949889-1950094	205	+	NA
Pf3D7_11_v3	1950157	1951918	Pf3D7_11_v3-1950157-1951918	1761	+	[ID=PF3D7_1149000;description=antigen 332, DBL-like protein;]
Pf3D7_11_v3	1951978	1952102	Pf3D7_11_v3-1951978-1952102	124	+	[ID=PF3D7_1149000;description=antigen 332, DBL-like protein;]
Pf3D7_11_v3	1952154	1952668	Pf3D7_11_v3-1952154-1952668	514	+	[ID=PF3D7_1149000;description=antigen 332, DBL-like protein;]
Pf3D7_11_v3	1952985	1953192	Pf3D7_11_v3-1952985-1953192	207	+	[ID=PF3D7_1149000;description=antigen 332, DBL-like protein;]
Pf3D7_11_v3	1953433	1953703	Pf3D7_11_v3-1953433-1953703	270	+	[ID=PF3D7_1149000;description=antigen 332, DBL-like protein;]
Pf3D7_11_v3	1954170	1954330	Pf3D7_11_v3-1954170-1954330	160	+	[ID=PF3D7_1149000;description=antigen 332, DBL-like protein;]
Pf3D7_11_v3	1954964	1955295	Pf3D7_11_v3-1954964-1955295	331	+	[ID=PF3D7_1149000;description=antigen 332, DBL-like protein;]
Pf3D7_11_v3	1955703	1956200	Pf3D7_11_v3-1955703-1956200	497	+	[ID=PF3D7_1149000;description=antigen 332, DBL-like protein;]
Pf3D7_11_v3	1956590	1956800	Pf3D7_11_v3-1956590-1956800	210	+	[ID=PF3D7_1149000;description=antigen 332, DBL-like protein;]
Pf3D7_11_v3	1957085	1957516	Pf3D7_11_v3-1957085-1957516	431	+	[ID=PF3D7_1149000;description=antigen 332, DBL-like protein;]
Pf3D7_11_v3	1957736	1957979	Pf3D7_11_v3-1957736-1957979	243	+	[ID=PF3D7_1149000;description=antigen 332, DBL-like protein;]
Pf3D7_11_v3	1958135	1958310	Pf3D7_11_v3-1958135-1958310	175	+	[ID=PF3D7_1149000;description=antigen 332, DBL-like protein;]
Pf3D7_11_v3	1959191	1959377	Pf3D7_11_v3-1959191-1959377	186	+	[ID=PF3D7_1149000;description=antigen 332, DBL-like protein;]
Pf3D7_11_v3	1959614	1959811	Pf3D7_11_v3-1959614-1959811	197	+	[ID=PF3D7_1149000;description=antigen 332, DBL-like protein;]
Pf3D7_11_v3	1960800	1961075	Pf3D7_11_v3-1960800-1961075	275	+	[ID=PF3D7_1149000;description=antigen 332, DBL-like protein;]
Pf3D7_11_v3	1961167	1961531	Pf3D7_11_v3-1961167-1961531	364	+	[ID=PF3D7_1149000;description=antigen 332, DBL-like protein;]
Pf3D7_11_v3	1962812	1962968	Pf3D7_11_v3-1962812-1962968	156	+	[ID=PF3D7_1149000;description=antigen 332, DBL-like protein;]
Pf3D7_11_v3	1963675	1963812	Pf3D7_11_v3-1963675-1963812	137	+	[ID=PF3D7_1149000;description=antigen 332, DBL-like protein;]
Pf3D7_11_v3	1964707	1964997	Pf3D7_11_v3-1964707-1964997	290	+	[ID=PF3D7_1149000;description=antigen 332, DBL-like protein;]
Pf3D7_11_v3	1965481	1965625	Pf3D7_11_v3-1965481-1965625	144	+	[ID=PF3D7_1149000;description=antigen 332, DBL-like protein;]
Pf3D7_11_v3	1965728	1965864	Pf3D7_11_v3-1965728-1965864	136	+	[ID=PF3D7_1149000;description=antigen 332, DBL-like protein;]
Pf3D7_11_v3	1966065	1966674	Pf3D7_11_v3-1966065-1966674	609	+	[ID=PF3D7_1149000;description=antigen 332, DBL-like protein;]
Pf3D7_11_v3	1966875	1967921	Pf3D7_11_v3-1966875-1967921	1046	+	[ID=PF3D7_1149000;description=antigen 332, DBL-like protein;]
Pf3D7_11_v3	1968015	1968898	Pf3D7_11_v3-1968015-1968898	883	+	[ID=PF3D7_1149000;description=antigen 332, DBL-like protein;]
Pf3D7_11_v3	1969933	1970417	Pf3D7_11_v3-1969933-1970417	484	+	NA
Pf3D7_11_v3	1970958	1971114	Pf3D7_11_v3-1970958-1971114	156	+	NA
Pf3D7_11_v3	1971212	1971444	Pf3D7_11_v3-1971212-1971444	232	+	NA
Pf3D7_11_v3	1971505	1971703	Pf3D7_11_v3-1971505-1971703	198	+	NA
Pf3D7_11_v3	1971899	1972109	Pf3D7_11_v3-1971899-1972109	210	+	NA
Pf3D7_11_v3	1972269	1972619	Pf3D7_11_v3-1972269-1972619	350	+	[ID=PF3D7_1149100;description=Plasmodium exported protein, unknown function;]
Pf3D7_11_v3	1972707	1972876	Pf3D7_11_v3-1972707-1972876	169	+	[ID=PF3D7_1149100;description=Plasmodium exported protein, unknown function;]
Pf3D7_11_v3	1973728	1974002	Pf3D7_11_v3-1973728-1974002	274	+	[ID=PF3D7_1149100;description=Plasmodium exported protein, unknown function;]
Pf3D7_11_v3	1974065	1974236	Pf3D7_11_v3-1974065-1974236	171	+	NA
Pf3D7_11_v3	1974717	1974926	Pf3D7_11_v3-1974717-1974926	209	+	NA
Pf3D7_11_v3	1975691	1976088	Pf3D7_11_v3-1975691-1976088	397	+	NA
Pf3D7_11_v3	1976366	1976583	Pf3D7_11_v3-1976366-1976583	217	+	[ID=PF3D7_1149200;description=ring-infected erythrocyte surface antigen;]
Pf3D7_11_v3	1976738	1977863	Pf3D7_11_v3-1976738-1977863	1125	+	[ID=PF3D7_1149200;description=ring-infected erythrocyte surface antigen;]
Pf3D7_11_v3	1978160	1979335	Pf3D7_11_v3-1978160-1979335	1175	+	[ID=PF3D7_1149200;description=ring-infected erythrocyte surface antigen;]
Pf3D7_11_v3	1979783	1980009	Pf3D7_11_v3-1979783-1980009	226	+	[ID=PF3D7_1149200;description=ring-infected erythrocyte surface antigen;]
Pf3D7_11_v3	1980408	1981016	Pf3D7_11_v3-1980408-1981016	608	+	NA
Pf3D7_11_v3	1981110	1981288	Pf3D7_11_v3-1981110-1981288	178	+	NA
Pf3D7_11_v3	1981476	1981967	Pf3D7_11_v3-1981476-1981967	491	+	NA
Pf3D7_11_v3	1982148	1982313	Pf3D7_11_v3-1982148-1982313	165	+	NA
Pf3D7_11_v3	1982395	1982668	Pf3D7_11_v3-1982395-1982668	273	+	[ID=PF3D7_1149300;description=serine/threonine protein kinase, FIKK family;]
Pf3D7_11_v3	1982724	1983506	Pf3D7_11_v3-1982724-1983506	782	+	[ID=PF3D7_1149300;description=serine/threonine protein kinase, FIKK family;]
Pf3D7_11_v3	1983558	1984083	Pf3D7_11_v3-1983558-1984083	525	+	[ID=PF3D7_1149300;description=serine/threonine protein kinase, FIKK family;]
Pf3D7_11_v3	1984525	1984656	Pf3D7_11_v3-1984525-1984656	131	+	NA
Pf3D7_11_v3	1984716	1984901	Pf3D7_11_v3-1984716-1984901	185	+	NA
Pf3D7_11_v3	1985112	1985395	Pf3D7_11_v3-1985112-1985395	283	+	NA
Pf3D7_11_v3	1985597	1985825	Pf3D7_11_v3-1985597-1985825	228	+	NA
Pf3D7_11_v3	1985884	1986228	Pf3D7_11_v3-1985884-1986228	344	+	[ID=PF3D7_1149400;description=Plasmodium exported protein, unknown function;]
Pf3D7_11_v3	1986284	1986501	Pf3D7_11_v3-1986284-1986501	217	+	[ID=PF3D7_1149400;description=Plasmodium exported protein, unknown function;]
Pf3D7_11_v3	1986561	1986814	Pf3D7_11_v3-1986561-1986814	253	+	[ID=PF3D7_1149400;description=Plasmodium exported protein, unknown function;]
Pf3D7_11_v3	1987058	1987191	Pf3D7_11_v3-1987058-1987191	133	+	NA
Pf3D7_11_v3	1987265	1987528	Pf3D7_11_v3-1987265-1987528	263	+	NA
Pf3D7_11_v3	1987691	1987861	Pf3D7_11_v3-1987691-1987861	170	+	NA
Pf3D7_11_v3	1987976	1988190	Pf3D7_11_v3-1987976-1988190	214	+	NA
Pf3D7_11_v3	1988435	1988543	Pf3D7_11_v3-1988435-1988543	108	+	NA
Pf3D7_11_v3	1988640	1988860	Pf3D7_11_v3-1988640-1988860	220	+	NA
Pf3D7_11_v3	1989065	1989762	Pf3D7_11_v3-1989065-1989762	697	+	NA
Pf3D7_11_v3	1990326	1990530	Pf3D7_11_v3-1990326-1990530	204	+	NA
Pf3D7_11_v3	1990886	1991290	Pf3D7_11_v3-1990886-1991290	404	+	NA
Pf3D7_11_v3	1991347	1992851	Pf3D7_11_v3-1991347-1992851	1504	+	[ID=PF3D7_1149500;description=ring-infected erythrocyte surface antigen 2, pseudogene;]
Pf3D7_11_v3	1992907	1993669	Pf3D7_11_v3-1992907-1993669	762	+	[ID=PF3D7_1149500;description=ring-infected erythrocyte surface antigen 2, pseudogene;]
Pf3D7_11_v3	1993833	1994061	Pf3D7_11_v3-1993833-1994061	228	+	[ID=PF3D7_1149500;description=ring-infected erythrocyte surface antigen 2, pseudogene;]
Pf3D7_11_v3	1994139	1994363	Pf3D7_11_v3-1994139-1994363	224	+	NA
Pf3D7_11_v3	1995234	1995394	Pf3D7_11_v3-1995234-1995394	160	+	NA
Pf3D7_11_v3	1995459	1995614	Pf3D7_11_v3-1995459-1995614	155	+	NA
Pf3D7_11_v3	1995678	1996112	Pf3D7_11_v3-1995678-1996112	434	+	NA
Pf3D7_11_v3	1996349	1996650	Pf3D7_11_v3-1996349-1996650	301	+	NA
Pf3D7_11_v3	1996745	1997019	Pf3D7_11_v3-1996745-1997019	274	+	NA
Pf3D7_11_v3	1997095	1997221	Pf3D7_11_v3-1997095-1997221	126	+	NA
Pf3D7_11_v3	1997276	1997425	Pf3D7_11_v3-1997276-1997425	149	+	NA
Pf3D7_11_v3	1997674	1997884	Pf3D7_11_v3-1997674-1997884	210	+	NA
Pf3D7_11_v3	1997944	1998371	Pf3D7_11_v3-1997944-1998371	427	+	NA
Pf3D7_11_v3	1998638	1998759	Pf3D7_11_v3-1998638-1998759	121	+	NA
Pf3D7_11_v3	1998833	1999151	Pf3D7_11_v3-1998833-1999151	318	+	NA
Pf3D7_11_v3	1999245	1999390	Pf3D7_11_v3-1999245-1999390	145	+	NA
Pf3D7_11_v3	1999600	1999713	Pf3D7_11_v3-1999600-1999713	113	+	NA
Pf3D7_11_v3	2000687	2000889	Pf3D7_11_v3-2000687-2000889	202	+	NA
Pf3D7_11_v3	2000941	2001239	Pf3D7_11_v3-2000941-2001239	298	+	[ID=PF3D7_1149600;description=DnaJ protein, putative;]
Pf3D7_11_v3	2001300	2003328	Pf3D7_11_v3-2001300-2003328	2028	+	[ID=PF3D7_1149600;description=DnaJ protein, putative;]
Pf3D7_13_v3	2769916	2770905	Pf3D7_13_v3-2769916-2770905	989	+	[ID=PF3D7_1369500;description=conserved protein, unknown function;]
Pf3D7_13_v3	2770961	2771467	Pf3D7_13_v3-2770961-2771467	506	+	[ID=PF3D7_1369500;description=conserved protein, unknown function;]
Pf3D7_13_v3	2771663	2771813	Pf3D7_13_v3-2771663-2771813	150	+	[ID=PF3D7_1369500;description=conserved protein, unknown function;]
Pf3D7_13_v3	2771887	2772965	Pf3D7_13_v3-2771887-2772965	1078	+	[ID=PF3D7_1369500;description=conserved protein, unknown function;]
Pf3D7_13_v3	2773080	2773650	Pf3D7_13_v3-2773080-2773650	570	+	[ID=PF3D7_1369500;description=conserved protein, unknown function;]
Pf3D7_13_v3	2774155	2774710	Pf3D7_13_v3-2774155-2774710	555	+	[ID=PF3D7_1369600;description=conserved Plasmodium protein, unknown function;]
Pf3D7_13_v3	2774869	2775493	Pf3D7_13_v3-2774869-2775493	624	+	[ID=PF3D7_1369600;description=conserved Plasmodium protein, unknown function;]
Pf3D7_13_v3	2775610	2776921	Pf3D7_13_v3-2775610-2776921	1311	+	[ID=PF3D7_1369600;description=conserved Plasmodium protein, unknown function;]
Pf3D7_13_v3	2777126	2777233	Pf3D7_13_v3-2777126-2777233	107	+	NA
Pf3D7_13_v3	2777655	2777791	Pf3D7_13_v3-2777655-2777791	136	+	NA
Pf3D7_13_v3	2778157	2778285	Pf3D7_13_v3-2778157-2778285	128	+	[ID=PF3D7_1369700;description=U2 small nuclear ribonucleoprotein A', putative;]
Pf3D7_13_v3	2778583	2778883	Pf3D7_13_v3-2778583-2778883	300	+	[ID=PF3D7_1369700;description=U2 small nuclear ribonucleoprotein A', putative;]
Pf3D7_13_v3	2778997	2779177	Pf3D7_13_v3-2778997-2779177	180	+	[ID=PF3D7_1369700;description=U2 small nuclear ribonucleoprotein A', putative;]
Pf3D7_13_v3	2779657	2779858	Pf3D7_13_v3-2779657-2779858	201	+	NA
Pf3D7_13_v3	2780301	2780950	Pf3D7_13_v3-2780301-2780950	649	+	[ID=PF3D7_1369800;description=tRNA Arginine;]
Pf3D7_13_v3	2781600	2781700	Pf3D7_13_v3-2781600-2781700	100	+	[ID=PF3D7_1370000;description=tRNA Arginine;]
Pf3D7_13_v3	2781758	2781880	Pf3D7_13_v3-2781758-2781880	122	+	NA
Pf3D7_13_v3	2782031	2782518	Pf3D7_13_v3-2782031-2782518	487	+	NA
Pf3D7_13_v3	2783664	2783817	Pf3D7_13_v3-2783664-2783817	153	+	[ID=PF3D7_1370200;description=tRNA Glycine;]
Pf3D7_13_v3	2784008	2784200	Pf3D7_13_v3-2784008-2784200	192	+	NA
Pf3D7_13_v3	2784263	2784377	Pf3D7_13_v3-2784263-2784377	114	+	NA
Pf3D7_13_v3	2784601	2784701	Pf3D7_13_v3-2784601-2784701	100	+	NA
Pf3D7_13_v3	2784760	2784991	Pf3D7_13_v3-2784760-2784991	231	+	NA
Pf3D7_13_v3	2785226	2785343	Pf3D7_13_v3-2785226-2785343	117	+	NA
Pf3D7_13_v3	2785413	2785555	Pf3D7_13_v3-2785413-2785555	142	+	NA
Pf3D7_13_v3	2785616	2785794	Pf3D7_13_v3-2785616-2785794	178	+	NA
Pf3D7_13_v3	2785855	2786001	Pf3D7_13_v3-2785855-2786001	146	+	NA
Pf3D7_13_v3	2786279	2786460	Pf3D7_13_v3-2786279-2786460	181	+	NA
Pf3D7_13_v3	2786774	2786901	Pf3D7_13_v3-2786774-2786901	127	+	NA
Pf3D7_13_v3	2787013	2787118	Pf3D7_13_v3-2787013-2787118	105	+	NA
Pf3D7_13_v3	2787486	2787594	Pf3D7_13_v3-2787486-2787594	108	+	NA
Pf3D7_13_v3	2787861	2788389	Pf3D7_13_v3-2787861-2788389	528	+	[ID=PF3D7_1370300;description=membrane associated histidine-rich protein 1;]
Pf3D7_13_v3	2788459	2788713	Pf3D7_13_v3-2788459-2788713	254	+	[ID=PF3D7_1370300;description=membrane associated histidine-rich protein 1;]
Pf3D7_13_v3	2789153	2789278	Pf3D7_13_v3-2789153-2789278	125	+	NA
Pf3D7_13_v3	2790309	2790422	Pf3D7_13_v3-2790309-2790422	113	+	NA
Pf3D7_13_v3	2790638	2790808	Pf3D7_13_v3-2790638-2790808	170	+	NA
Pf3D7_13_v3	2790922	2791935	Pf3D7_13_v3-2790922-2791935	1013	+	NA
Pf3D7_13_v3	2792023	2792248	Pf3D7_11_v3-1918030-1918255-for	225	+	NA
Pf3D7_13_v3	2792364	2792564	Pf3D7_11_v3-1918371-1918571-for	200	+	NA
Pf3D7_13_v3	2792594	2792780	Pf3D7_11_v3-1918601-1918787-for	186	+	NA
Pf3D7_13_v3	2792852	2793012	Pf3D7_11_v3-1918859-1919019-for	160	+	NA
Pf3D7_13_v3	2793052	2793599	Pf3D7_11_v3-1919059-1919606-for	547	+	NA
Pf3D7_13_v3	2793626	2794313	Pf3D7_11_v3-1919633-1920323-for	687	+	[ID=PF3D7_1370500;description=unspecified product;]
Pf3D7_13_v3	2794485	2795176	Pf3D7_11_v3-1920483-1921173-for	691	+	[ID=PF3D7_1370500;description=unspecified product;]
Pf3D7_13_v3	2795279	2795936	Pf3D7_11_v3-1921274-1921931-for	657	+	NA
Pf3D7_13_v3	2796417	2796668	Pf3D7_11_v3-1922418-1922669-for	251	+	[ID=PF3D7_1370800;description=unspecified product;]
Pf3D7_13_v3	2797091	2797439	Pf3D7_11_v3-1923111-1923459-for	348	+	[ID=PF3D7_1370800;description=unspecified product;]
Pf3D7_13_v3	2797869	2797954	Pf3D7_11_v3-1923887-1923972-for	85	+	[ID=PF3D7_1370900;description=unspecified product;]
Pf3D7_13_v3	2797959	2798139	Pf3D7_11_v3-1923977-1924157-for	180	+	[ID=PF3D7_1370900;description=unspecified product;]
Pf3D7_13_v3	2798191	2798241	Pf3D7_11_v3-1924207-1924257-for	50	+	NA
Pf3D7_13_v3	2798408	2798579	Pf3D7_11_v3-1924423-1924594-for	171	+	NA
Pf3D7_13_v3	2798629	2799411	Pf3D7_11_v3-1924644-1925425-for	782	+	NA
Pf3D7_13_v3	2799453	2799663	Pf3D7_11_v3-1925455-1925667-for	210	+	NA
Pf3D7_13_v3	2799749	2800019	Pf3D7_11_v3-1925739-1926009-for	270	+	[ID=PF3D7_1371000;description=18S ribosomal RNA;]
Pf3D7_13_v3	2800269	2800344	Pf3D7_11_v3-1926259-1926334-for	75	+	[ID=PF3D7_1371000;description=18S ribosomal RNA;]
Pf3D7_13_v3	2801559	2801659	Pf3D7_11_v3-1927549-1927649-for	100	+	[ID=PF3D7_1371000;description=18S ribosomal RNA;]
Pf3D7_13_v3	2802129	2802630	Pf3D7_11_v3-1928119-1928619-for	501	+	[ID=PF3D7_1371000;description=18S ribosomal RNA;],[ID=PF3D7_1371200;description=5.8S ribosomal RNA;]
Pf3D7_13_v3	2802129	2804242	Pf3D7_11_v3-1928119-1930229-for	2113	+	[ID=PF3D7_1371000;description=18S ribosomal RNA;],[ID=PF3D7_1371200;description=5.8S ribosomal RNA;],[ID=PF3D7_1371300;description=28S ribosomal RNA;]
Pf3D7_13_v3	2802379	2802881	Pf3D7_11_v3-1928369-1928869-for	502	+	[ID=PF3D7_1371200;description=5.8S ribosomal RNA;]
Pf3D7_13_v3	2802630	2803132	Pf3D7_11_v3-1928619-1929119-for	502	+	[ID=PF3D7_1371200;description=5.8S ribosomal RNA;],[ID=PF3D7_1371300;description=28S ribosomal RNA;]
Pf3D7_13_v3	2802881	2803382	Pf3D7_11_v3-1928869-1929369-for	501	+	[ID=PF3D7_1371300;description=28S ribosomal RNA;]
Pf3D7_13_v3	2803132	2803632	Pf3D7_11_v3-1929119-1929619-for	500	+	[ID=PF3D7_1371300;description=28S ribosomal RNA;]
Pf3D7_13_v3	2803382	2803882	Pf3D7_11_v3-1929369-1929869-for	500	+	[ID=PF3D7_1371300;description=28S ribosomal RNA;]
Pf3D7_13_v3	2803632	2804132	Pf3D7_11_v3-1929619-1930119-for	500	+	[ID=PF3D7_1371300;description=28S ribosomal RNA;]
Pf3D7_13_v3	2804282	2804362	Pf3D7_11_v3-1930269-1930349-for	80	+	[ID=PF3D7_1371300;description=28S ribosomal RNA;]
Pf3D7_13_v3	2804382	2804457	Pf3D7_11_v3-1930369-1930444-for	75	+	[ID=PF3D7_1371300;description=28S ribosomal RNA;]
Pf3D7_13_v3	2804892	2805442	Pf3D7_11_v3-1930879-1931429-for	550	+	[ID=PF3D7_1371300;description=28S ribosomal RNA;]
Pf3D7_13_v3	2805472	2805682	Pf3D7_11_v3-1931459-1931669-for	210	+	[ID=PF3D7_1371300;description=28S ribosomal RNA;]
Pf3D7_13_v3	2805942	2806242	Pf3D7_11_v3-1931929-1932229-for	300	+	[ID=PF3D7_1371300;description=28S ribosomal RNA;]
Pf3D7_13_v3	2806392	2806522	Pf3D7_11_v3-1932379-1932509-for	130	+	[ID=PF3D7_1371300;description=28S ribosomal RNA;]
Pf3D7_13_v3	2806642	2806717	Pf3D7_11_v3-1932629-1932704-for	75	+	[ID=PF3D7_1371300;description=28S ribosomal RNA;]
Pf3D7_13_v3	2806742	2807178	Pf3D7_11_v3-1932729-1933165-for	436	+	[ID=PF3D7_1371300;description=28S ribosomal RNA;]
Pf3D7_13_v3	2807216	2807386	Pf3D7_11_v3-1933209-1933379-for	170	+	NA
Pf3D7_13_v3	2807879	2808000	Pf3D7_13_v3-2807879-2808000	121	+	NA
Pf3D7_13_v3	2808058	2808253	Pf3D7_13_v3-2808058-2808253	195	+	NA
Pf3D7_13_v3	2808310	2808429	Pf3D7_13_v3-2808310-2808429	119	+	NA
Pf3D7_13_v3	2808557	2809066	Pf3D7_13_v3-2808557-2809066	509	+	[ID=PF3D7_1371500;description=probable protein, unknown function;]
Pf3D7_13_v3	2809130	2809349	Pf3D7_13_v3-2809130-2809349	219	+	[ID=PF3D7_1371500;description=probable protein, unknown function;]
Pf3D7_13_v3	2809416	2809561	Pf3D7_13_v3-2809416-2809561	145	+	NA
Pf3D7_13_v3	2810295	2810670	Pf3D7_13_v3-2810295-2810670	375	+	NA
Pf3D7_13_v3	2810735	2810881	Pf3D7_13_v3-2810735-2810881	146	+	NA
Pf3D7_13_v3	2811531	2812250	Pf3D7_13_v3-2811531-2812250	719	+	[ID=PF3D7_1371600;description=erythrocyte binding like protein 1, pseudogene;]
Pf3D7_13_v3	2812302	2812715	Pf3D7_13_v3-2812302-2812715	413	+	[ID=PF3D7_1371600;description=erythrocyte binding like protein 1, pseudogene;]
Pf3D7_13_v3	2812812	2813812	Pf3D7_13_v3-2812812-2813812	1000	+	[ID=PF3D7_1371600;description=erythrocyte binding like protein 1, pseudogene;]
Pf3D7_13_v3	2813887	2817700	Pf3D7_13_v3-2813887-2817700	3813	+	[ID=PF3D7_1371600;description=erythrocyte binding like protein 1, pseudogene;]
Pf3D7_13_v3	2817793	2818576	Pf3D7_13_v3-2817793-2818576	783	+	[ID=PF3D7_1371600;description=erythrocyte binding like protein 1, pseudogene;]
Pf3D7_13_v3	2818775	2819613	Pf3D7_13_v3-2818775-2819613	838	+	[ID=PF3D7_1371600;description=erythrocyte binding like protein 1, pseudogene;]
Pf3D7_13_v3	2820030	2820183	Pf3D7_13_v3-2820030-2820183	153	+	[ID=PF3D7_1371600;description=erythrocyte binding like protein 1, pseudogene;]
Pf3D7_13_v3	2820926	2821184	Pf3D7_13_v3-2820926-2821184	258	+	[ID=PF3D7_1371700;description=serine/threonine protein kinase, FIKK family;]
Pf3D7_13_v3	2821296	2822771	Pf3D7_13_v3-2821296-2822771	1475	+	[ID=PF3D7_1371700;description=serine/threonine protein kinase, FIKK family;]
Pf3D7_13_v3	2823161	2823290	Pf3D7_13_v3-2823161-2823290	129	+	[ID=PF3D7_1371700;description=serine/threonine protein kinase, FIKK family;]
Pf3D7_13_v3	2823425	2823615	Pf3D7_13_v3-2823425-2823615	190	+	NA
Pf3D7_13_v3	2823750	2823926	Pf3D7_13_v3-2823750-2823926	176	+	NA
Pf3D7_13_v3	2824201	2824800	Pf3D7_13_v3-2824201-2824800	599	+	[ID=PF3D7_1371800;description=Plasmodium exported protein, unknown function;]
Pf3D7_13_v3	2824854	2825124	Pf3D7_13_v3-2824854-2825124	270	+	[ID=PF3D7_1371800;description=Plasmodium exported protein, unknown function;]
Pf3D7_13_v3	2825358	2825601	Pf3D7_13_v3-2825358-2825601	243	+	[ID=PF3D7_1371800;description=Plasmodium exported protein, unknown function;]
Pf3D7_13_v3	2825749	2825855	Pf3D7_13_v3-2825749-2825855	106	+	[ID=PF3D7_1371800;description=Plasmodium exported protein, unknown function;]
Pf3D7_13_v3	2826186	2826420	Pf3D7_13_v3-2826186-2826420	234	+	NA
Pf3D7_13_v3	2826858	2827202	Pf3D7_13_v3-2826858-2827202	344	+	NA
Pf3D7_13_v3	2827388	2827688	Pf3D7_13_v3-2827388-2827688	300	+	NA
Pf3D7_13_v3	2827848	2828019	Pf3D7_13_v3-2827848-2828019	171	+	NA
Pf3D7_13_v3	2828091	2828334	Pf3D7_13_v3-2828091-2828334	243	+	NA
Pf3D7_13_v3	2828407	2828869	Pf3D7_13_v3-2828407-2828869	462	+	NA
Pf3D7_13_v3	2829034	2829136	Pf3D7_13_v3-2829034-2829136	102	+	NA
Pf3D7_13_v3	2829294	2829415	Pf3D7_13_v3-2829294-2829415	121	+	NA
Pf3D7_13_v3	2829516	2829636	Pf3D7_13_v3-2829516-2829636	120	+	NA
Pf3D7_13_v3	2830017	2830660	Pf3D7_13_v3-2830017-2830660	643	+	[ID=PF3D7_1371900;description=Plasmodium exported protein, unknown function;]
Pf3D7_13_v3	2830737	2830860	Pf3D7_13_v3-2830737-2830860	123	+	NA
Pf3D7_13_v3	2831183	2831364	Pf3D7_13_v3-2831183-2831364	181	+	NA
Pf3D7_13_v3	2831522	2831674	Pf3D7_13_v3-2831522-2831674	152	+	NA
Pf3D7_13_v3	2831727	2831936	Pf3D7_13_v3-2831727-2831936	209	+	NA
Pf3D7_13_v3	2832158	2832341	Pf3D7_13_v3-2832158-2832341	183	+	NA
Pf3D7_13_v3	2832394	2832678	Pf3D7_13_v3-2832394-2832678	284	+	NA
Pf3D7_13_v3	2832731	2833130	Pf3D7_13_v3-2832731-2833130	399	+	[ID=PF3D7_1372000;description=Plasmodium exported protein (PHISTa), unknown function;]
Pf3D7_13_v3	2833189	2833399	Pf3D7_13_v3-2833189-2833399	210	+	[ID=PF3D7_1372000;description=Plasmodium exported protein (PHISTa), unknown function;]
Pf3D7_13_v3	2833624	2834247	Pf3D7_13_v3-2833624-2834247	623	+	[ID=PF3D7_1372000;description=Plasmodium exported protein (PHISTa), unknown function;]
Pf3D7_13_v3	2834318	2834467	Pf3D7_13_v3-2834318-2834467	149	+	[ID=PF3D7_1372000;description=Plasmodium exported protein (PHISTa), unknown function;]
Pf3D7_13_v3	2835244	2835413	Pf3D7_13_v3-2835244-2835413	169	+	NA
Pf3D7_13_v3	2835637	2835880	Pf3D7_13_v3-2835637-2835880	243	+	NA
Pf3D7_13_v3	2835962	2836106	Pf3D7_13_v3-2835962-2836106	144	+	NA
Pf3D7_13_v3	2836250	2836432	Pf3D7_13_v3-2836250-2836432	182	+	NA
Pf3D7_13_v3	2836888	2837194	Pf3D7_13_v3-2836888-2837194	306	+	[ID=PF3D7_1372100;description=Plasmodium exported protein (PHISTb), unknown function;]
Pf3D7_13_v3	2837317	2839073	Pf3D7_13_v3-2837317-2839073	1756	+	[ID=PF3D7_1372100;description=Plasmodium exported protein (PHISTb), unknown function;]
Pf3D7_13_v3	2839159	2839449	Pf3D7_13_v3-2839159-2839449	290	+	NA
Pf3D7_13_v3	2839623	2839789	Pf3D7_13_v3-2839623-2839789	166	+	NA
Pf3D7_13_v3	2840015	2840412	Pf3D7_13_v3-2840015-2840412	397	+	NA
Pf3D7_13_v3	2840426	2840501	Pf3D7_13_v3-2840426-2840501	75	+	NA
Pf3D7_13_v3	2840451	2840651	Pf3D7_13_v3-2840451-2840651	200	+	NA
Pf3D7_13_v3	2840467	2840631	Pf3D7_13_v3-2840467-2840631	164	+	NA
Pf3D7_13_v3	2840476	2840576	Pf3D7_13_v3-2840476-2840576	100	+	NA
Pf3D7_13_v3	2840501	2840651	Pf3D7_13_v3-2840501-2840651	150	+	NA
Pf3D7_13_v3	2840526	2840601	Pf3D7_13_v3-2840526-2840601	75	+	NA
Pf3D7_13_v3	2841426	2841501	Pf3D7_13_v3-2841426-2841501	75	+	[ID=PF3D7_1372200;description=histidine-rich protein III;]
Pf3D7_13_v3	2841426	2841526	Pf3D7_13_v3-2841426-2841526	100	+	[ID=PF3D7_1372200;description=histidine-rich protein III;]
Pf3D7_13_v3	2841426	2841626	Pf3D7_13_v3-2841426-2841626	200	+	[ID=PF3D7_1372200;description=histidine-rich protein III;]
Pf3D7_13_v3	2841551	2841626	Pf3D7_13_v3-2841551-2841626	75	+	[ID=PF3D7_1372200;description=histidine-rich protein III;]
Pf3D7_13_v3	2841576	2841726	Pf3D7_13_v3-2841576-2841726	150	+	[ID=PF3D7_1372200;description=histidine-rich protein III;]
Pf3D7_13_v3	2841600	2841728	Pf3D7_13_v3-2841600-2841728	128	+	[ID=PF3D7_1372200;description=histidine-rich protein III;]
Pf3D7_13_v3	2841601	2841701	Pf3D7_13_v3-2841601-2841701	100	+	[ID=PF3D7_1372200;description=histidine-rich protein III;]
Pf3D7_13_v3	2841626	2841701	Pf3D7_13_v3-2841626-2841701	75	+	[ID=PF3D7_1372200;description=histidine-rich protein III;]
Pf3D7_13_v3	2841776	2841926	Pf3D7_13_v3-2841776-2841926	150	+	NA
Pf3D7_13_v3	2841801	2841901	Pf3D7_13_v3-2841801-2841901	100	+	NA
Pf3D7_13_v3	2841826	2841901	Pf3D7_13_v3-2841826-2841901	75	+	NA
Pf3D7_13_v3	2841976	2842076	Pf3D7_13_v3-2841976-2842076	100	+	NA
Pf3D7_13_v3	2842001	2842076	Pf3D7_13_v3-2842001-2842076	75	+	NA
Pf3D7_13_v3	2842001	2842301	Pf3D7_13_v3-2842001-2842301	300	+	NA
Pf3D7_13_v3	2842026	2842226	Pf3D7_13_v3-2842026-2842226	200	+	NA
Pf3D7_13_v3	2842038	2842461	Pf3D7_13_v3-2842038-2842461	423	+	NA
Pf3D7_13_v3	2842076	2842151	Pf3D7_13_v3-2842076-2842151	75	+	NA
Pf3D7_13_v3	2842076	2842176	Pf3D7_13_v3-2842076-2842176	100	+	NA
Pf3D7_13_v3	2842101	2842251	Pf3D7_13_v3-2842101-2842251	150	+	NA
Pf3D7_13_v3	2842151	2842226	Pf3D7_13_v3-2842151-2842226	75	+	NA
Pf3D7_13_v3	2842226	2842301	Pf3D7_13_v3-2842226-2842301	75	+	NA
Pf3D7_13_v3	2842251	2842351	Pf3D7_13_v3-2842251-2842351	100	+	NA
Pf3D7_13_v3	2842251	2842401	Pf3D7_13_v3-2842251-2842401	150	+	NA
Pf3D7_13_v3	2842251	2842451	Pf3D7_13_v3-2842251-2842451	200	+	NA
Pf3D7_13_v3	2842301	2842376	Pf3D7_13_v3-2842301-2842376	75	+	NA
Pf3D7_13_v3	2842301	2842601	Pf3D7_13_v3-2842301-2842601	300	+	NA
Pf3D7_13_v3	2842351	2842451	Pf3D7_13_v3-2842351-2842451	100	+	NA
Pf3D7_13_v3	2842426	2842501	Pf3D7_13_v3-2842426-2842501	75	+	NA
Pf3D7_13_v3	2842476	2842688	Pf3D7_13_v3-2842476-2842688	212	+	NA
Pf3D7_13_v3	2842501	2842576	Pf3D7_13_v3-2842501-2842576	75	+	NA
Pf3D7_13_v3	2842501	2842601	Pf3D7_13_v3-2842501-2842601	100	+	NA
Pf3D7_13_v3	2842501	2842651	Pf3D7_13_v3-2842501-2842651	150	+	NA
Pf3D7_13_v3	2842515	2842804	Pf3D7_13_v3-2842515-2842804	289	+	NA
Pf3D7_13_v3	2842576	2842651	Pf3D7_13_v3-2842576-2842651	75	+	NA
Pf3D7_13_v3	2842601	2842688	Pf3D7_13_v3-2842601-2842688	87	+	NA
Pf3D7_13_v3	2843108	2843446	Pf3D7_13_v3-2843108-2843446	338	+	NA
Pf3D7_13_v3	2843641	2843863	Pf3D7_13_v3-2843641-2843863	222	+	NA
Pf3D7_13_v3	2843930	2844101	Pf3D7_13_v3-2843930-2844101	171	+	NA
Pf3D7_13_v3	2844247	2844785	Pf3D7_13_v3-2844247-2844785	538	+	NA
