# Supplementary material for: Interchromosomal segmental duplication drives translocation and loss of P. falciparum histidine-rich protein 3
Source: eLife. 2024 Oct 7;13:RP93534. doi: 10.7554/eLife.93534 (PMC11458181; doi:10.7554/eLife.93534)
Supplement: Supplementary file 3. — This table contains information on the windows contianing variations in the non-paralogous windows used for analyzing the regions of interest on chromosomes 5, 7, 8, 11, and 13. These variable regions can be found completely within the windows of Supplementary file 1. Metadata on P. falciparum samples. [file elife-93534-supp3.xlsx]

## Sheet: Table S3 Variations in non-para
Supplementary File 3. Variations in Core Genome Windows. This table contains information on the windows contianing variations in the non-paralogous windows used for analyzing the regions of interest on chromosomes 5, 7, 8, 11, and 13. These variable regions can be found compleely within the windows of Supporting Information Table 2.
Chromosome=Window's chromosome name in 3D7 Start Position=Window's starting base position (0-based) End Position=Window's ending base position (0-based) Chromosome: Start-End Position=Window's chromosome name, starting, and ending base positions Window Length: Window's length (=End Position - Start Position) Strand (+/-): Positive or negative DNA strand that window is in respect to Functional Ann…
Chromosome	Start Position	End Position	Chromosome: Start-End Position	Window Length	Strand (+/-)	Functional Annotation
Pf3D7_05_v3	929384	929408	Pf3D7_05_v3-929384-929984-for__var.0	24	+	[ID=PF3D7_0522400;description=conserved Plasmodium protein, unknown function;]
Pf3D7_05_v3	929487	929516	Pf3D7_05_v3-929384-929984-for__var.1	29	+	[ID=PF3D7_0522400;description=conserved Plasmodium protein, unknown function;]
Pf3D7_05_v3	929578	929618	Pf3D7_05_v3-929384-929984-for__var.2	40	+	[ID=PF3D7_0522400;description=conserved Plasmodium protein, unknown function;]
Pf3D7_05_v3	929612	929641	Pf3D7_05_v3-929384-929984-for__var.3	29	+	[ID=PF3D7_0522400;description=conserved Plasmodium protein, unknown function;]
Pf3D7_05_v3	929740	929769	Pf3D7_05_v3-929384-929984-for__var.4	29	+	[ID=PF3D7_0522400;description=conserved Plasmodium protein, unknown function;]
Pf3D7_05_v3	929814	929843	Pf3D7_05_v3-929384-929984-for__var.5	29	+	[ID=PF3D7_0522400;description=conserved Plasmodium protein, unknown function;]
Pf3D7_05_v3	929858	929909	Pf3D7_05_v3-929384-929984-for__var.6	51	+	[ID=PF3D7_0522400;description=conserved Plasmodium protein, unknown function;]
Pf3D7_05_v3	930125	930143	Pf3D7_05_v3-930125-931175-for__var.0	18	+	[ID=PF3D7_0522400;description=conserved Plasmodium protein, unknown function;]
Pf3D7_05_v3	930420	930449	Pf3D7_05_v3-930125-931175-for__var.1	29	+	[ID=PF3D7_0522400;description=conserved Plasmodium protein, unknown function;]
Pf3D7_05_v3	930865	930894	Pf3D7_05_v3-930125-931175-for__var.2	29	+	[ID=PF3D7_0522400;description=conserved Plasmodium protein, unknown function;]
Pf3D7_05_v3	930932	930974	Pf3D7_05_v3-930125-931175-for__var.3	42	+	[ID=PF3D7_0522400;description=conserved Plasmodium protein, unknown function;]
Pf3D7_05_v3	932302	932331	Pf3D7_05_v3-931751-933001-for__var.0	29	+	[ID=PF3D7_0522400;description=conserved Plasmodium protein, unknown function;]
Pf3D7_05_v3	932399	932428	Pf3D7_05_v3-931751-933001-for__var.1	29	+	[ID=PF3D7_0522400;description=conserved Plasmodium protein, unknown function;]
Pf3D7_05_v3	932526	932555	Pf3D7_05_v3-931751-933001-for__var.2	29	+	[ID=PF3D7_0522400;description=conserved Plasmodium protein, unknown function;]
Pf3D7_05_v3	932856	932892	Pf3D7_05_v3-931751-933001-for__var.3	36	+	[ID=PF3D7_0522400;description=conserved Plasmodium protein, unknown function;]
Pf3D7_05_v3	933119	933148	Pf3D7_05_v3-933100-936400-for__var.00	29	+	[ID=PF3D7_0522400;description=conserved Plasmodium protein, unknown function;]
Pf3D7_05_v3	933459	933488	Pf3D7_05_v3-933100-936400-for__var.01	29	+	[ID=PF3D7_0522400;description=conserved Plasmodium protein, unknown function;]
Pf3D7_05_v3	934132	934161	Pf3D7_05_v3-933100-936400-for__var.02	29	+	[ID=PF3D7_0522400;description=conserved Plasmodium protein, unknown function;]
Pf3D7_05_v3	934939	934969	Pf3D7_05_v3-933100-936400-for__var.03	30	+	[ID=PF3D7_0522400;description=conserved Plasmodium protein, unknown function;]
Pf3D7_05_v3	934991	935020	Pf3D7_05_v3-933100-936400-for__var.04	29	+	[ID=PF3D7_0522400;description=conserved Plasmodium protein, unknown function;]
Pf3D7_05_v3	935027	935065	Pf3D7_05_v3-933100-936400-for__var.05	38	+	[ID=PF3D7_0522400;description=conserved Plasmodium protein, unknown function;]
Pf3D7_05_v3	935120	935149	Pf3D7_05_v3-933100-936400-for__var.06	29	+	[ID=PF3D7_0522400;description=conserved Plasmodium protein, unknown function;]
Pf3D7_05_v3	935317	935346	Pf3D7_05_v3-933100-936400-for__var.07	29	+	[ID=PF3D7_0522400;description=conserved Plasmodium protein, unknown function;]
Pf3D7_05_v3	935444	935473	Pf3D7_05_v3-933100-936400-for__var.08	29	+	[ID=PF3D7_0522400;description=conserved Plasmodium protein, unknown function;]
Pf3D7_05_v3	936262	936291	Pf3D7_05_v3-933100-936400-for__var.09	29	+	[ID=PF3D7_0522400;description=conserved Plasmodium protein, unknown function;]
Pf3D7_05_v3	936280	936322	Pf3D7_05_v3-933100-936400-for__var.10	42	+	[ID=PF3D7_0522400;description=conserved Plasmodium protein, unknown function;]
Pf3D7_05_v3	936337	936366	Pf3D7_05_v3-933100-936400-for__var.11	29	+
Pf3D7_05_v3	936793	936870	Pf3D7_05_v3-936620-936870-for__var.0	77	+
Pf3D7_05_v3	937063	937108	Pf3D7_05_v3-937044-937444-for__var.0	45	+
Pf3D7_05_v3	937106	937138	Pf3D7_05_v3-937044-937444-for__var.1	32	+
Pf3D7_05_v3	937128	937157	Pf3D7_05_v3-937044-937444-for__var.2	29	+
Pf3D7_05_v3	937192	937230	Pf3D7_05_v3-937044-937444-for__var.3	38	+
Pf3D7_05_v3	937337	937368	Pf3D7_05_v3-937044-937444-for__var.4	31	+	[ID=PF3D7_0522500;description=50S ribosomal protein L17, apicoplast, putative;]
Pf3D7_05_v3	937401	937442	Pf3D7_05_v3-937044-937444-for__var.5	41	+	[ID=PF3D7_0522500;description=50S ribosomal protein L17, apicoplast, putative;]
Pf3D7_05_v3	937972	938069	Pf3D7_05_v3-937819-938069-for__var.0	97	+	[ID=PF3D7_0522500;description=50S ribosomal protein L17, apicoplast, putative;]
Pf3D7_05_v3	938799	938871	Pf3D7_05_v3-938571-938871-for__var.0	72	+
Pf3D7_05_v3	939615	939644	Pf3D7_05_v3-939537-939937-for__var.0	29	+
Pf3D7_05_v3	939729	939758	Pf3D7_05_v3-939537-939937-for__var.1	29	+
Pf3D7_05_v3	939755	939784	Pf3D7_05_v3-939537-939937-for__var.2	29	+
Pf3D7_05_v3	940260	940289	Pf3D7_05_v3-940250-941700-for__var.0	29	+	[ID=PF3D7_0522600;description=inner membrane complex protein;]
Pf3D7_05_v3	940371	940400	Pf3D7_05_v3-940250-941700-for__var.1	29	+	[ID=PF3D7_0522600;description=inner membrane complex protein;]
Pf3D7_05_v3	940518	940547	Pf3D7_05_v3-940250-941700-for__var.2	29	+	[ID=PF3D7_0522600;description=inner membrane complex protein;]
Pf3D7_05_v3	940557	940586	Pf3D7_05_v3-940250-941700-for__var.3	29	+	[ID=PF3D7_0522600;description=inner membrane complex protein;]
Pf3D7_05_v3	940662	940691	Pf3D7_05_v3-940250-941700-for__var.4	29	+	[ID=PF3D7_0522600;description=inner membrane complex protein;]
Pf3D7_05_v3	940849	940878	Pf3D7_05_v3-940250-941700-for__var.5	29	+	[ID=PF3D7_0522600;description=inner membrane complex protein;]
Pf3D7_05_v3	940923	940952	Pf3D7_05_v3-940250-941700-for__var.6	29	+	[ID=PF3D7_0522600;description=inner membrane complex protein;]
Pf3D7_05_v3	941140	941169	Pf3D7_05_v3-940250-941700-for__var.7	29	+	[ID=PF3D7_0522600;description=inner membrane complex protein;]
Pf3D7_05_v3	941344	941373	Pf3D7_05_v3-940250-941700-for__var.8	29	+	[ID=PF3D7_0522600;description=inner membrane complex protein;]
Pf3D7_05_v3	942971	943000	Pf3D7_05_v3-942650-943000-for__var.0	29	+	[ID=PF3D7_0522700;description=iron-sulfur assembly protein;]
Pf3D7_05_v3	943683	943753	Pf3D7_05_v3-943683-943933-for__var.0	70	+	[ID=PF3D7_0522700;description=iron-sulfur assembly protein;]
Pf3D7_05_v3	943763	943792	Pf3D7_05_v3-943683-943933-for__var.1	29	+	[ID=PF3D7_0522700;description=iron-sulfur assembly protein;]
Pf3D7_05_v3	943878	943933	Pf3D7_05_v3-943683-943933-for__var.2	55	+
Pf3D7_05_v3	944460	944489	Pf3D7_05_v3-944389-944589-for__var.0	29	+	[ID=PF3D7_0522800;description=pre-mRNA-splicing factor BUD31, putative;]
Pf3D7_05_v3	944905	944984	Pf3D7_05_v3-944684-944984-for__var.0	79	+	[ID=PF3D7_0522800;description=pre-mRNA-splicing factor BUD31, putative;]
Pf3D7_05_v3	945439	945468	Pf3D7_05_v3-945426-945876-for__var.0	29	+
Pf3D7_05_v3	945513	945542	Pf3D7_05_v3-945426-945876-for__var.1	29	+
Pf3D7_05_v3	945628	945657	Pf3D7_05_v3-945426-945876-for__var.2	29	+
Pf3D7_05_v3	945845	945876	Pf3D7_05_v3-945426-945876-for__var.3	31	+
Pf3D7_05_v3	947060	947160	Pf3D7_05_v3-947060-947460-for__var.0	100	+
Pf3D7_05_v3	947152	947198	Pf3D7_05_v3-947060-947460-for__var.1	46	+
Pf3D7_05_v3	947244	947315	Pf3D7_05_v3-947060-947460-for__var.2	71	+
Pf3D7_05_v3	947310	947441	Pf3D7_05_v3-947060-947460-for__var.3	131	+
Pf3D7_05_v3	948642	948671	Pf3D7_05_v3-948639-949389-for__var.00	29	+
Pf3D7_05_v3	948709	948741	Pf3D7_05_v3-948639-949389-for__var.01	32	+
Pf3D7_05_v3	948803	948832	Pf3D7_05_v3-948639-949389-for__var.02	29	+
Pf3D7_05_v3	948870	948899	Pf3D7_05_v3-948639-949389-for__var.03	29	+
Pf3D7_05_v3	948888	948917	Pf3D7_05_v3-948639-949389-for__var.04	29	+
Pf3D7_05_v3	948983	949031	Pf3D7_05_v3-948639-949389-for__var.05	48	+	[ID=PF3D7_0522900;description=zinc finger protein, putative;]
Pf3D7_05_v3	949028	949057	Pf3D7_05_v3-948639-949389-for__var.06	29	+	[ID=PF3D7_0522900;description=zinc finger protein, putative;]
Pf3D7_05_v3	949088	949117	Pf3D7_05_v3-948639-949389-for__var.07	29	+	[ID=PF3D7_0522900;description=zinc finger protein, putative;]
Pf3D7_05_v3	949143	949172	Pf3D7_05_v3-948639-949389-for__var.08	29	+	[ID=PF3D7_0522900;description=zinc finger protein, putative;]
Pf3D7_05_v3	949283	949312	Pf3D7_05_v3-948639-949389-for__var.09	29	+	[ID=PF3D7_0522900;description=zinc finger protein, putative;]
Pf3D7_05_v3	949327	949356	Pf3D7_05_v3-948639-949389-for__var.10	29	+	[ID=PF3D7_0522900;description=zinc finger protein, putative;]
Pf3D7_05_v3	949644	949765	Pf3D7_05_v3-949560-951510-for__var.0	121	+	[ID=PF3D7_0522900;description=zinc finger protein, putative;]
Pf3D7_05_v3	950047	950168	Pf3D7_05_v3-949560-951510-for__var.1	121	+	[ID=PF3D7_0522900;description=zinc finger protein, putative;]
Pf3D7_05_v3	950399	950543	Pf3D7_05_v3-949560-951510-for__var.2	144	+	[ID=PF3D7_0522900;description=zinc finger protein, putative;]
Pf3D7_05_v3	950569	950690	Pf3D7_05_v3-949560-951510-for__var.3	121	+	[ID=PF3D7_0522900;description=zinc finger protein, putative;]
Pf3D7_05_v3	950693	950814	Pf3D7_05_v3-949560-951510-for__var.4	121	+	[ID=PF3D7_0522900;description=zinc finger protein, putative;]
Pf3D7_05_v3	950856	950977	Pf3D7_05_v3-949560-951510-for__var.5	121	+	[ID=PF3D7_0522900;description=zinc finger protein, putative;]
Pf3D7_05_v3	950957	951078	Pf3D7_05_v3-949560-951510-for__var.6	121	+	[ID=PF3D7_0522900;description=zinc finger protein, putative;]
Pf3D7_05_v3	951059	951180	Pf3D7_05_v3-949560-951510-for__var.7	121	+	[ID=PF3D7_0522900;description=zinc finger protein, putative;]
Pf3D7_05_v3	951954	951983	Pf3D7_05_v3-951917-952217-for__var.0	29	+	[ID=PF3D7_0522900;description=zinc finger protein, putative;]
Pf3D7_05_v3	951992	952021	Pf3D7_05_v3-951917-952217-for__var.1	29	+	[ID=PF3D7_0522900;description=zinc finger protein, putative;]
Pf3D7_05_v3	952037	952066	Pf3D7_05_v3-951917-952217-for__var.2	29	+	[ID=PF3D7_0522900;description=zinc finger protein, putative;]
Pf3D7_05_v3	952076	952105	Pf3D7_05_v3-951917-952217-for__var.3	29	+	[ID=PF3D7_0522900;description=zinc finger protein, putative;]
Pf3D7_05_v3	952092	952133	Pf3D7_05_v3-951917-952217-for__var.4	41	+	[ID=PF3D7_0522900;description=zinc finger protein, putative;]
Pf3D7_05_v3	952140	952169	Pf3D7_05_v3-951917-952217-for__var.5	29	+	[ID=PF3D7_0522900;description=zinc finger protein, putative;]
Pf3D7_05_v3	952328	952357	Pf3D7_05_v3-952324-952874-for__var.0	29	+	[ID=PF3D7_0522900;description=zinc finger protein, putative;]
Pf3D7_05_v3	952488	952517	Pf3D7_05_v3-952324-952874-for__var.1	29	+	[ID=PF3D7_0522900;description=zinc finger protein, putative;]
Pf3D7_05_v3	952565	952594	Pf3D7_05_v3-952324-952874-for__var.2	29	+	[ID=PF3D7_0522900;description=zinc finger protein, putative;]
Pf3D7_05_v3	952676	952705	Pf3D7_05_v3-952324-952874-for__var.3	29	+	[ID=PF3D7_0522900;description=zinc finger protein, putative;]
Pf3D7_05_v3	953364	953393	Pf3D7_05_v3-952995-953595-for__var.0	29	+	[ID=PF3D7_0522900;description=zinc finger protein, putative;]
Pf3D7_05_v3	953385	953414	Pf3D7_05_v3-952995-953595-for__var.1	29	+	[ID=PF3D7_0522900;description=zinc finger protein, putative;]
Pf3D7_05_v3	953465	953495	Pf3D7_05_v3-952995-953595-for__var.2	30	+	[ID=PF3D7_0522900;description=zinc finger protein, putative;]
Pf3D7_05_v3	954073	954102	Pf3D7_05_v3-954002-954452-for__var.0	29	+
Pf3D7_05_v3	954147	954183	Pf3D7_05_v3-954002-954452-for__var.1	36	+
Pf3D7_05_v3	954170	954199	Pf3D7_05_v3-954002-954452-for__var.2	29	+
Pf3D7_05_v3	954865	954896	Pf3D7_05_v3-954660-955410-for__var.0	31	+
Pf3D7_05_v3	954936	954967	Pf3D7_05_v3-954660-955410-for__var.1	31	+
Pf3D7_05_v3	954953	954984	Pf3D7_05_v3-954660-955410-for__var.2	31	+
Pf3D7_05_v3	954981	955042	Pf3D7_05_v3-954660-955410-for__var.3	61	+
Pf3D7_05_v3	955040	955071	Pf3D7_05_v3-954660-955410-for__var.4	31	+
Pf3D7_05_v3	955084	955120	Pf3D7_05_v3-954660-955410-for__var.5	36	+
Pf3D7_05_v3	955323	955354	Pf3D7_05_v3-954660-955410-for__var.6	31	+
Pf3D7_05_v3	957827	957879	Pf3D7_05_v3-957775-959675-for__var.0	52	+
Pf3D7_05_v3	958122	958167	Pf3D7_05_v3-957775-959675-for__var.1	45	+	[ID=PF3D7_0523000;description=multidrug resistance protein 1;]
Pf3D7_05_v3	958172	958217	Pf3D7_05_v3-957775-959675-for__var.2	45	+	[ID=PF3D7_0523000;description=multidrug resistance protein 1;]
Pf3D7_05_v3	958254	958299	Pf3D7_05_v3-957775-959675-for__var.3	45	+	[ID=PF3D7_0523000;description=multidrug resistance protein 1;]
Pf3D7_05_v3	958412	958462	Pf3D7_05_v3-957775-959675-for__var.4	50	+	[ID=PF3D7_0523000;description=multidrug resistance protein 1;]
Pf3D7_05_v3	958561	958606	Pf3D7_05_v3-957775-959675-for__var.5	45	+	[ID=PF3D7_0523000;description=multidrug resistance protein 1;]
Pf3D7_05_v3	958613	958658	Pf3D7_05_v3-957775-959675-for__var.6	45	+	[ID=PF3D7_0523000;description=multidrug resistance protein 1;]
Pf3D7_05_v3	958836	958881	Pf3D7_05_v3-957775-959675-for__var.7	45	+	[ID=PF3D7_0523000;description=multidrug resistance protein 1;]
Pf3D7_05_v3	959378	959423	Pf3D7_05_v3-957775-959675-for__var.8	45	+	[ID=PF3D7_0523000;description=multidrug resistance protein 1;]
Pf3D7_05_v3	960031	960060	Pf3D7_05_v3-959904-962154-for__var.00	29	+	[ID=PF3D7_0523000;description=multidrug resistance protein 1;]
Pf3D7_05_v3	960122	960151	Pf3D7_05_v3-959904-962154-for__var.01	29	+	[ID=PF3D7_0523000;description=multidrug resistance protein 1;]
Pf3D7_05_v3	960184	960213	Pf3D7_05_v3-959904-962154-for__var.02	29	+	[ID=PF3D7_0523000;description=multidrug resistance protein 1;]
Pf3D7_05_v3	960220	960254	Pf3D7_05_v3-959904-962154-for__var.03	34	+	[ID=PF3D7_0523000;description=multidrug resistance protein 1;]
Pf3D7_05_v3	960394	960423	Pf3D7_05_v3-959904-962154-for__var.04	29	+	[ID=PF3D7_0523000;description=multidrug resistance protein 1;]
Pf3D7_05_v3	960421	960450	Pf3D7_05_v3-959904-962154-for__var.05	29	+	[ID=PF3D7_0523000;description=multidrug resistance protein 1;]
Pf3D7_05_v3	960514	960543	Pf3D7_05_v3-959904-962154-for__var.06	29	+	[ID=PF3D7_0523000;description=multidrug resistance protein 1;]
Pf3D7_05_v3	960687	960716	Pf3D7_05_v3-959904-962154-for__var.07	29	+	[ID=PF3D7_0523000;description=multidrug resistance protein 1;]
Pf3D7_05_v3	960708	960737	Pf3D7_05_v3-959904-962154-for__var.08	29	+	[ID=PF3D7_0523000;description=multidrug resistance protein 1;]
Pf3D7_05_v3	960777	960806	Pf3D7_05_v3-959904-962154-for__var.09	29	+	[ID=PF3D7_0523000;description=multidrug resistance protein 1;]
Pf3D7_05_v3	960796	960830	Pf3D7_05_v3-959904-962154-for__var.10	34	+	[ID=PF3D7_0523000;description=multidrug resistance protein 1;]
Pf3D7_05_v3	960974	961003	Pf3D7_05_v3-959904-962154-for__var.11	29	+	[ID=PF3D7_0523000;description=multidrug resistance protein 1;]
Pf3D7_05_v3	960998	961027	Pf3D7_05_v3-959904-962154-for__var.12	29	+	[ID=PF3D7_0523000;description=multidrug resistance protein 1;]
Pf3D7_05_v3	961078	961110	Pf3D7_05_v3-959904-962154-for__var.13	32	+	[ID=PF3D7_0523000;description=multidrug resistance protein 1;]
Pf3D7_05_v3	961199	961228	Pf3D7_05_v3-959904-962154-for__var.14	29	+	[ID=PF3D7_0523000;description=multidrug resistance protein 1;]
Pf3D7_05_v3	961285	961314	Pf3D7_05_v3-959904-962154-for__var.15	29	+	[ID=PF3D7_0523000;description=multidrug resistance protein 1;]
Pf3D7_05_v3	961345	961374	Pf3D7_05_v3-959904-962154-for__var.16	29	+	[ID=PF3D7_0523000;description=multidrug resistance protein 1;]
Pf3D7_05_v3	961551	961580	Pf3D7_05_v3-959904-962154-for__var.17	29	+	[ID=PF3D7_0523000;description=multidrug resistance protein 1;]
Pf3D7_05_v3	961610	961639	Pf3D7_05_v3-959904-962154-for__var.18	29	+	[ID=PF3D7_0523000;description=multidrug resistance protein 1;]
Pf3D7_05_v3	961815	961844	Pf3D7_05_v3-959904-962154-for__var.19	29	+	[ID=PF3D7_0523000;description=multidrug resistance protein 1;]
Pf3D7_05_v3	963147	963196	Pf3D7_05_v3-962987-964437-for__var.0	49	+
Pf3D7_05_v3	963251	963280	Pf3D7_05_v3-962987-964437-for__var.1	29	+	[ID=PF3D7_0523100;description=mitochondrial-processing peptidase subunit alpha, putative;]
Pf3D7_05_v3	963395	963424	Pf3D7_05_v3-962987-964437-for__var.2	29	+	[ID=PF3D7_0523100;description=mitochondrial-processing peptidase subunit alpha, putative;]
Pf3D7_05_v3	963548	963577	Pf3D7_05_v3-962987-964437-for__var.3	29	+	[ID=PF3D7_0523100;description=mitochondrial-processing peptidase subunit alpha, putative;]
Pf3D7_05_v3	963859	963888	Pf3D7_05_v3-962987-964437-for__var.4	29	+	[ID=PF3D7_0523100;description=mitochondrial-processing peptidase subunit alpha, putative;]
Pf3D7_05_v3	964088	964117	Pf3D7_05_v3-962987-964437-for__var.5	29	+	[ID=PF3D7_0523100;description=mitochondrial-processing peptidase subunit alpha, putative;]
Pf3D7_05_v3	964667	964730	Pf3D7_05_v3-964667-965067-for__var.0	63	+	[ID=PF3D7_0523100;description=mitochondrial-processing peptidase subunit alpha, putative;]
Pf3D7_05_v3	964743	964772	Pf3D7_05_v3-964667-965067-for__var.1	29	+	[ID=PF3D7_0523100;description=mitochondrial-processing peptidase subunit alpha, putative;]
Pf3D7_05_v3	965649	965678	Pf3D7_05_v3-965575-965775-for__var.0	29	+
Pf3D7_05_v3	965680	965709	Pf3D7_05_v3-965575-965775-for__var.1	29	+
Pf3D7_05_v3	966273	966335	Pf3D7_05_v3-966013-968013-for__var.0	62	+	[ID=PF3D7_0523200;description=heptatricopeptide repeat-containing protein, putative;]
Pf3D7_05_v3	966559	966602	Pf3D7_05_v3-966013-968013-for__var.1	43	+	[ID=PF3D7_0523200;description=heptatricopeptide repeat-containing protein, putative;]
Pf3D7_05_v3	966684	966733	Pf3D7_05_v3-966013-968013-for__var.2	49	+	[ID=PF3D7_0523200;description=heptatricopeptide repeat-containing protein, putative;]
Pf3D7_05_v3	966787	966830	Pf3D7_05_v3-966013-968013-for__var.3	43	+	[ID=PF3D7_0523200;description=heptatricopeptide repeat-containing protein, putative;]
Pf3D7_05_v3	967053	967096	Pf3D7_05_v3-966013-968013-for__var.4	43	+	[ID=PF3D7_0523200;description=heptatricopeptide repeat-containing protein, putative;]
Pf3D7_05_v3	967212	967255	Pf3D7_05_v3-966013-968013-for__var.5	43	+	[ID=PF3D7_0523200;description=heptatricopeptide repeat-containing protein, putative;]
Pf3D7_05_v3	967242	967310	Pf3D7_05_v3-966013-968013-for__var.6	68	+	[ID=PF3D7_0523200;description=heptatricopeptide repeat-containing protein, putative;]
Pf3D7_05_v3	967798	967841	Pf3D7_05_v3-966013-968013-for__var.7	43	+	[ID=PF3D7_0523200;description=heptatricopeptide repeat-containing protein, putative;]
Pf3D7_05_v3	967950	967993	Pf3D7_05_v3-966013-968013-for__var.8	43	+	[ID=PF3D7_0523200;description=heptatricopeptide repeat-containing protein, putative;]
Pf3D7_05_v3	968150	968179	Pf3D7_05_v3-968063-969063-for__var.0	29	+	[ID=PF3D7_0523200;description=heptatricopeptide repeat-containing protein, putative;]
Pf3D7_05_v3	968437	968466	Pf3D7_05_v3-968063-969063-for__var.1	29	+	[ID=PF3D7_0523200;description=heptatricopeptide repeat-containing protein, putative;]
Pf3D7_05_v3	968560	968599	Pf3D7_05_v3-968063-969063-for__var.2	39	+	[ID=PF3D7_0523200;description=heptatricopeptide repeat-containing protein, putative;]
Pf3D7_05_v3	968748	968777	Pf3D7_05_v3-968063-969063-for__var.3	29	+	[ID=PF3D7_0523200;description=heptatricopeptide repeat-containing protein, putative;]
Pf3D7_05_v3	968809	968838	Pf3D7_05_v3-968063-969063-for__var.4	29	+	[ID=PF3D7_0523200;description=heptatricopeptide repeat-containing protein, putative;]
Pf3D7_05_v3	968997	969063	Pf3D7_05_v3-968063-969063-for__var.5	66	+	[ID=PF3D7_0523200;description=heptatricopeptide repeat-containing protein, putative;]
Pf3D7_05_v3	970338	970367	Pf3D7_05_v3-970272-970722-for__var.0	29	+	[ID=PF3D7_0523300;description=cytochrome c oxidase subunit ApiCOX18, putative;]
Pf3D7_05_v3	970590	970634	Pf3D7_05_v3-970272-970722-for__var.1	44	+	[ID=PF3D7_0523300;description=cytochrome c oxidase subunit ApiCOX18, putative;]
Pf3D7_05_v3	970867	971236	Pf3D7_05_v3-970836-971236-for__var.0	369	+	[ID=PF3D7_0523300;description=cytochrome c oxidase subunit ApiCOX18, putative;]
Pf3D7_05_v3	971396	971437	Pf3D7_05_v3-971316-971616-for__var.0	41	+
Pf3D7_05_v3	971424	971465	Pf3D7_05_v3-971316-971616-for__var.1	41	+
Pf3D7_05_v3	971532	971573	Pf3D7_05_v3-971316-971616-for__var.2	41	+
Pf3D7_05_v3	971958	971995	Pf3D7_05_v3-971717-972267-for__var.0	37	+
Pf3D7_05_v3	972014	972062	Pf3D7_05_v3-971717-972267-for__var.1	48	+
Pf3D7_05_v3	972096	972133	Pf3D7_05_v3-971717-972267-for__var.2	37	+
Pf3D7_05_v3	973704	973754	Pf3D7_05_v3-973672-973872-for__var.0	50	+	[ID=PF3D7_0523400;description=DnaJ protein, putative;]
Pf3D7_05_v3	973751	973780	Pf3D7_05_v3-973672-973872-for__var.1	29	+	[ID=PF3D7_0523400;description=DnaJ protein, putative;]
Pf3D7_05_v3	974479	974508	Pf3D7_05_v3-974141-975641-for__var.0	29	+	[ID=PF3D7_0523400;description=DnaJ protein, putative;]
Pf3D7_05_v3	975049	975078	Pf3D7_05_v3-974141-975641-for__var.1	29	+	[ID=PF3D7_0523400;description=DnaJ protein, putative;]
Pf3D7_05_v3	975092	975121	Pf3D7_05_v3-974141-975641-for__var.2	29	+	[ID=PF3D7_0523400;description=DnaJ protein, putative;]
Pf3D7_05_v3	975327	975364	Pf3D7_05_v3-974141-975641-for__var.3	37	+	[ID=PF3D7_0523400;description=DnaJ protein, putative;]
Pf3D7_05_v3	975524	975553	Pf3D7_05_v3-974141-975641-for__var.4	29	+	[ID=PF3D7_0523400;description=DnaJ protein, putative;]
Pf3D7_05_v3	977193	977222	Pf3D7_05_v3-977117-977367-for__var.0	29	+	[ID=PF3D7_0523500;description=dynein light chain Tctex-type, putative;]
Pf3D7_05_v3	977845	977895	Pf3D7_05_v3-977796-978046-for__var.0	50	+
Pf3D7_05_v3	977960	977993	Pf3D7_05_v3-977796-978046-for__var.1	33	+
Pf3D7_05_v3	978330	978483	Pf3D7_05_v3-978233-978483-for__var.0	153	+
Pf3D7_05_v3	979401	979431	Pf3D7_05_v3-979231-979431-for__var.0	30	+	[ID=PF3D7_0523600;description=conserved protein, unknown function;]
Pf3D7_05_v3	979736	979765	Pf3D7_05_v3-979677-979977-for__var.0	29	+	[ID=PF3D7_0523600;description=conserved protein, unknown function;]
Pf3D7_05_v3	979828	979857	Pf3D7_05_v3-979677-979977-for__var.1	29	+	[ID=PF3D7_0523600;description=conserved protein, unknown function;]
Pf3D7_05_v3	979860	979891	Pf3D7_05_v3-979677-979977-for__var.2	31	+	[ID=PF3D7_0523600;description=conserved protein, unknown function;]
Pf3D7_05_v3	980793	980828	Pf3D7_05_v3-980741-983741-for__var.00	35	+	[ID=PF3D7_0523700;description=conserved Plasmodium membrane protein, unknown function;]
Pf3D7_05_v3	980885	980920	Pf3D7_05_v3-980741-983741-for__var.01	35	+	[ID=PF3D7_0523700;description=conserved Plasmodium membrane protein, unknown function;]
Pf3D7_05_v3	981021	981262	Pf3D7_05_v3-980741-983741-for__var.02	241	+	[ID=PF3D7_0523700;description=conserved Plasmodium membrane protein, unknown function;]
Pf3D7_05_v3	981353	981388	Pf3D7_05_v3-980741-983741-for__var.03	35	+	[ID=PF3D7_0523700;description=conserved Plasmodium membrane protein, unknown function;]
Pf3D7_05_v3	981384	981419	Pf3D7_05_v3-980741-983741-for__var.04	35	+	[ID=PF3D7_0523700;description=conserved Plasmodium membrane protein, unknown function;]
Pf3D7_05_v3	981570	981605	Pf3D7_05_v3-980741-983741-for__var.05	35	+	[ID=PF3D7_0523700;description=conserved Plasmodium membrane protein, unknown function;]
Pf3D7_05_v3	981722	981757	Pf3D7_05_v3-980741-983741-for__var.06	35	+	[ID=PF3D7_0523700;description=conserved Plasmodium membrane protein, unknown function;]
Pf3D7_05_v3	981742	981777	Pf3D7_05_v3-980741-983741-for__var.07	35	+	[ID=PF3D7_0523700;description=conserved Plasmodium membrane protein, unknown function;]
Pf3D7_05_v3	982061	982096	Pf3D7_05_v3-980741-983741-for__var.08	35	+	[ID=PF3D7_0523700;description=conserved Plasmodium membrane protein, unknown function;]
Pf3D7_05_v3	983037	983074	Pf3D7_05_v3-980741-983741-for__var.09	37	+	[ID=PF3D7_0523700;description=conserved Plasmodium membrane protein, unknown function;]
Pf3D7_05_v3	983188	983235	Pf3D7_05_v3-980741-983741-for__var.10	47	+	[ID=PF3D7_0523700;description=conserved Plasmodium membrane protein, unknown function;]
Pf3D7_05_v3	983335	983375	Pf3D7_05_v3-980741-983741-for__var.11	40	+	[ID=PF3D7_0523700;description=conserved Plasmodium membrane protein, unknown function;]
Pf3D7_05_v3	983927	983956	Pf3D7_05_v3-983874-984924-for__var.0	29	+	[ID=PF3D7_0523700;description=conserved Plasmodium membrane protein, unknown function;]
Pf3D7_05_v3	983974	984003	Pf3D7_05_v3-983874-984924-for__var.1	29	+	[ID=PF3D7_0523700;description=conserved Plasmodium membrane protein, unknown function;]
Pf3D7_05_v3	984503	984532	Pf3D7_05_v3-983874-984924-for__var.2	29	+	[ID=PF3D7_0523700;description=conserved Plasmodium membrane protein, unknown function;]
Pf3D7_05_v3	984583	984612	Pf3D7_05_v3-983874-984924-for__var.3	29	+	[ID=PF3D7_0523700;description=conserved Plasmodium membrane protein, unknown function;]
Pf3D7_05_v3	984599	984628	Pf3D7_05_v3-983874-984924-for__var.4	29	+	[ID=PF3D7_0523700;description=conserved Plasmodium membrane protein, unknown function;]
Pf3D7_05_v3	984758	984787	Pf3D7_05_v3-983874-984924-for__var.5	29	+	[ID=PF3D7_0523700;description=conserved Plasmodium membrane protein, unknown function;]
Pf3D7_05_v3	986188	986217	Pf3D7_05_v3-986087-986287-for__var.0	29	+
Pf3D7_05_v3	986891	987010	Pf3D7_05_v3-986891-987141-for__var.0	119	+
Pf3D7_05_v3	987010	987055	Pf3D7_05_v3-986891-987141-for__var.1	45	+
Pf3D7_05_v3	987472	987501	Pf3D7_05_v3-987375-987575-for__var.0	29	+
Pf3D7_05_v3	987492	987521	Pf3D7_05_v3-987375-987575-for__var.1	29	+
Pf3D7_05_v3	987510	987575	Pf3D7_05_v3-987375-987575-for__var.2	65	+
Pf3D7_05_v3	988275	988305	Pf3D7_05_v3-988224-988424-for__var.0	30	+
Pf3D7_05_v3	988618	988649	Pf3D7_05_v3-988547-988747-for__var.0	31	+
Pf3D7_05_v3	988671	988700	Pf3D7_05_v3-988547-988747-for__var.1	29	+
Pf3D7_05_v3	1239433	1239464	Pf3D7_05_v3-1239308-1240258__var-0	31	+	[ID=PF3D7_0530400;description=conserved Plasmodium protein, unknown function;]
Pf3D7_05_v3	1239621	1239652	Pf3D7_05_v3-1239308-1240258__var-1	31	+	[ID=PF3D7_0530400;description=conserved Plasmodium protein, unknown function;]
Pf3D7_05_v3	1239701	1239732	Pf3D7_05_v3-1239308-1240258__var-2	31	+	[ID=PF3D7_0530400;description=conserved Plasmodium protein, unknown function;]
Pf3D7_05_v3	1239866	1239897	Pf3D7_05_v3-1239308-1240258__var-3	31	+	[ID=PF3D7_0530400;description=conserved Plasmodium protein, unknown function;]
Pf3D7_05_v3	1240098	1240129	Pf3D7_05_v3-1239308-1240258__var-4	31	+	[ID=PF3D7_0530400;description=conserved Plasmodium protein, unknown function;]
Pf3D7_05_v3	1240163	1240194	Pf3D7_05_v3-1239308-1240258__var-5	31	+	[ID=PF3D7_0530400;description=conserved Plasmodium protein, unknown function;]
Pf3D7_05_v3	1240228	1240258	Pf3D7_05_v3-1239308-1240258__var-6	30	+	[ID=PF3D7_0530400;description=conserved Plasmodium protein, unknown function;]
Pf3D7_05_v3	1240423	1240452	Pf3D7_05_v3-1240361-1241061__var-0	29	+	[ID=PF3D7_0530400;description=conserved Plasmodium protein, unknown function;]
Pf3D7_05_v3	1240467	1240496	Pf3D7_05_v3-1240361-1241061__var-1	29	+	[ID=PF3D7_0530400;description=conserved Plasmodium protein, unknown function;]
Pf3D7_05_v3	1240525	1240554	Pf3D7_05_v3-1240361-1241061__var-2	29	+	[ID=PF3D7_0530400;description=conserved Plasmodium protein, unknown function;]
Pf3D7_05_v3	1240543	1240572	Pf3D7_05_v3-1240361-1241061__var-3	29	+	[ID=PF3D7_0530400;description=conserved Plasmodium protein, unknown function;]
Pf3D7_05_v3	1240728	1240757	Pf3D7_05_v3-1240361-1241061__var-4	29	+	[ID=PF3D7_0530400;description=conserved Plasmodium protein, unknown function;]
Pf3D7_05_v3	1240829	1240858	Pf3D7_05_v3-1240361-1241061__var-5	29	+	[ID=PF3D7_0530400;description=conserved Plasmodium protein, unknown function;]
Pf3D7_05_v3	1240948	1240977	Pf3D7_05_v3-1240361-1241061__var-6	29	+	[ID=PF3D7_0530400;description=conserved Plasmodium protein, unknown function;]
Pf3D7_05_v3	1240999	1241028	Pf3D7_05_v3-1240361-1241061__var-7	29	+	[ID=PF3D7_0530400;description=conserved Plasmodium protein, unknown function;]
Pf3D7_05_v3	1241378	1241407	Pf3D7_05_v3-1241196-1241746__var-0	29	+	[ID=PF3D7_0530400;description=conserved Plasmodium protein, unknown function;]
Pf3D7_05_v3	1241422	1241451	Pf3D7_05_v3-1241196-1241746__var-1	29	+	[ID=PF3D7_0530400;description=conserved Plasmodium protein, unknown function;]
Pf3D7_05_v3	1241711	1241740	Pf3D7_05_v3-1241196-1241746__var-2	29	+	[ID=PF3D7_0530400;description=conserved Plasmodium protein, unknown function;]
Pf3D7_05_v3	1242234	1242263	Pf3D7_05_v3-1242179-1242729__var-0	29	+	[ID=PF3D7_0530400;description=conserved Plasmodium protein, unknown function;]
Pf3D7_05_v3	1243121	1243180	Pf3D7_05_v3-1243060-1243960__var-0	59	+	[ID=PF3D7_0530400;description=conserved Plasmodium protein, unknown function;]
Pf3D7_05_v3	1243191	1243220	Pf3D7_05_v3-1243060-1243960__var-1	29	+	[ID=PF3D7_0530400;description=conserved Plasmodium protein, unknown function;]
Pf3D7_05_v3	1243509	1243538	Pf3D7_05_v3-1243060-1243960__var-2	29	+	[ID=PF3D7_0530400;description=conserved Plasmodium protein, unknown function;]
Pf3D7_05_v3	1243788	1243817	Pf3D7_05_v3-1243060-1243960__var-3	29	+	[ID=PF3D7_0530400;description=conserved Plasmodium protein, unknown function;]
Pf3D7_05_v3	1243841	1243870	Pf3D7_05_v3-1243060-1243960__var-4	29	+	[ID=PF3D7_0530400;description=conserved Plasmodium protein, unknown function;]
Pf3D7_05_v3	1244687	1244716	Pf3D7_05_v3-1244687-1246987__var-00	29	+	NA
Pf3D7_05_v3	1244967	1245001	Pf3D7_05_v3-1244687-1246987__var-01	34	+	[ID=PF3D7_0530500;description=conserved Plasmodium membrane protein, unknown function;]
Pf3D7_05_v3	1245285	1245314	Pf3D7_05_v3-1244687-1246987__var-02	29	+	[ID=PF3D7_0530500;description=conserved Plasmodium membrane protein, unknown function;]
Pf3D7_05_v3	1245383	1245412	Pf3D7_05_v3-1244687-1246987__var-03	29	+	[ID=PF3D7_0530500;description=conserved Plasmodium membrane protein, unknown function;]
Pf3D7_05_v3	1245407	1245436	Pf3D7_05_v3-1244687-1246987__var-04	29	+	[ID=PF3D7_0530500;description=conserved Plasmodium membrane protein, unknown function;]
Pf3D7_05_v3	1245670	1245699	Pf3D7_05_v3-1244687-1246987__var-05	29	+	[ID=PF3D7_0530500;description=conserved Plasmodium membrane protein, unknown function;]
Pf3D7_05_v3	1245940	1245969	Pf3D7_05_v3-1244687-1246987__var-06	29	+	[ID=PF3D7_0530500;description=conserved Plasmodium membrane protein, unknown function;]
Pf3D7_05_v3	1246029	1246058	Pf3D7_05_v3-1244687-1246987__var-07	29	+	[ID=PF3D7_0530500;description=conserved Plasmodium membrane protein, unknown function;]
Pf3D7_05_v3	1246116	1246145	Pf3D7_05_v3-1244687-1246987__var-08	29	+	[ID=PF3D7_0530500;description=conserved Plasmodium membrane protein, unknown function;]
Pf3D7_05_v3	1246213	1246242	Pf3D7_05_v3-1244687-1246987__var-09	29	+	[ID=PF3D7_0530500;description=conserved Plasmodium membrane protein, unknown function;]
Pf3D7_05_v3	1246452	1246481	Pf3D7_05_v3-1244687-1246987__var-10	29	+	[ID=PF3D7_0530500;description=conserved Plasmodium membrane protein, unknown function;]
Pf3D7_05_v3	1246865	1246894	Pf3D7_05_v3-1244687-1246987__var-11	29	+	[ID=PF3D7_0530500;description=conserved Plasmodium membrane protein, unknown function;]
Pf3D7_05_v3	1246946	1246975	Pf3D7_05_v3-1244687-1246987__var-12	29	+	[ID=PF3D7_0530500;description=conserved Plasmodium membrane protein, unknown function;]
Pf3D7_05_v3	1247509	1247538	Pf3D7_05_v3-1247264-1247814__var-0	29	+	[ID=PF3D7_0530500;description=conserved Plasmodium membrane protein, unknown function;]
Pf3D7_05_v3	1247552	1247581	Pf3D7_05_v3-1247264-1247814__var-1	29	+	[ID=PF3D7_0530500;description=conserved Plasmodium membrane protein, unknown function;]
Pf3D7_05_v3	1247627	1247656	Pf3D7_05_v3-1247264-1247814__var-2	29	+	[ID=PF3D7_0530500;description=conserved Plasmodium membrane protein, unknown function;]
Pf3D7_05_v3	1247744	1247793	Pf3D7_05_v3-1247264-1247814__var-3	49	+	[ID=PF3D7_0530500;description=conserved Plasmodium membrane protein, unknown function;]
Pf3D7_05_v3	1247899	1248099	Pf3D7_05_v3-1247899-1248099__subseq-0	200	+	[ID=PF3D7_0530500;description=conserved Plasmodium membrane protein, unknown function;]
Pf3D7_05_v3	1248846	1248875	Pf3D7_05_v3-1248769-1249269__var-0	29	+	[ID=PF3D7_0530600;description=XAP-5 DNA binding protein, putative;]
Pf3D7_05_v3	1248897	1248926	Pf3D7_05_v3-1248769-1249269__var-1	29	+	[ID=PF3D7_0530600;description=XAP-5 DNA binding protein, putative;]
Pf3D7_05_v3	1249158	1249187	Pf3D7_05_v3-1248769-1249269__var-2	29	+	[ID=PF3D7_0530600;description=XAP-5 DNA binding protein, putative;]
Pf3D7_05_v3	1249247	1249269	Pf3D7_05_v3-1248769-1249269__var-3	22	+	[ID=PF3D7_0530600;description=XAP-5 DNA binding protein, putative;]
Pf3D7_05_v3	1249604	1249633	Pf3D7_05_v3-1249604-1249804__var-0	29	+	[ID=PF3D7_0530600;description=XAP-5 DNA binding protein, putative;]
Pf3D7_05_v3	1249646	1249675	Pf3D7_05_v3-1249604-1249804__var-1	29	+	[ID=PF3D7_0530600;description=XAP-5 DNA binding protein, putative;]
Pf3D7_05_v3	1249689	1249718	Pf3D7_05_v3-1249604-1249804__var-2	29	+	[ID=PF3D7_0530600;description=XAP-5 DNA binding protein, putative;]
Pf3D7_05_v3	1250663	1250762	Pf3D7_05_v3-1250663-1251463__var-0	99	+	[ID=PF3D7_0530700;description=conserved Plasmodium protein, unknown function;]
Pf3D7_05_v3	1250786	1250851	Pf3D7_05_v3-1250663-1251463__var-1	65	+	[ID=PF3D7_0530700;description=conserved Plasmodium protein, unknown function;]
Pf3D7_05_v3	1251082	1251147	Pf3D7_05_v3-1250663-1251463__var-2	65	+	[ID=PF3D7_0530700;description=conserved Plasmodium protein, unknown function;]
Pf3D7_05_v3	1251160	1251225	Pf3D7_05_v3-1250663-1251463__var-3	65	+	[ID=PF3D7_0530700;description=conserved Plasmodium protein, unknown function;]
Pf3D7_05_v3	1252046	1252080	Pf3D7_05_v3-1251630-1252080__var-0	34	+	[ID=PF3D7_0530700;description=conserved Plasmodium protein, unknown function;]
Pf3D7_05_v3	1252417	1252446	Pf3D7_05_v3-1252296-1252946__var-0	29	+	[ID=PF3D7_0530700;description=conserved Plasmodium protein, unknown function;]
Pf3D7_05_v3	1252466	1252502	Pf3D7_05_v3-1252296-1252946__var-1	36	+	[ID=PF3D7_0530700;description=conserved Plasmodium protein, unknown function;]
Pf3D7_05_v3	1252555	1252584	Pf3D7_05_v3-1252296-1252946__var-2	29	+	[ID=PF3D7_0530700;description=conserved Plasmodium protein, unknown function;]
Pf3D7_05_v3	1252588	1252618	Pf3D7_05_v3-1252296-1252946__var-3	30	+	[ID=PF3D7_0530700;description=conserved Plasmodium protein, unknown function;]
Pf3D7_05_v3	1252687	1252730	Pf3D7_05_v3-1252296-1252946__var-4	43	+	[ID=PF3D7_0530700;description=conserved Plasmodium protein, unknown function;]
Pf3D7_05_v3	1252809	1252838	Pf3D7_05_v3-1252296-1252946__var-5	29	+	[ID=PF3D7_0530700;description=conserved Plasmodium protein, unknown function;]
Pf3D7_05_v3	1253196	1253225	Pf3D7_05_v3-1253154-1254154__var-0	29	+	[ID=PF3D7_0530700;description=conserved Plasmodium protein, unknown function;]
Pf3D7_05_v3	1253386	1253415	Pf3D7_05_v3-1253154-1254154__var-1	29	+	[ID=PF3D7_0530700;description=conserved Plasmodium protein, unknown function;]
Pf3D7_05_v3	1253443	1253472	Pf3D7_05_v3-1253154-1254154__var-2	29	+	[ID=PF3D7_0530700;description=conserved Plasmodium protein, unknown function;]
Pf3D7_05_v3	1253465	1253494	Pf3D7_05_v3-1253154-1254154__var-3	29	+	[ID=PF3D7_0530700;description=conserved Plasmodium protein, unknown function;]
Pf3D7_05_v3	1253584	1253613	Pf3D7_05_v3-1253154-1254154__var-4	29	+	[ID=PF3D7_0530700;description=conserved Plasmodium protein, unknown function;]
Pf3D7_05_v3	1253612	1253641	Pf3D7_05_v3-1253154-1254154__var-5	29	+	[ID=PF3D7_0530700;description=conserved Plasmodium protein, unknown function;]
Pf3D7_05_v3	1253850	1253884	Pf3D7_05_v3-1253154-1254154__var-6	34	+	[ID=PF3D7_0530700;description=conserved Plasmodium protein, unknown function;]
Pf3D7_05_v3	1253950	1253979	Pf3D7_05_v3-1253154-1254154__var-7	29	+	[ID=PF3D7_0530700;description=conserved Plasmodium protein, unknown function;]
Pf3D7_05_v3	1254239	1254268	Pf3D7_05_v3-1254229-1254579__var-0	29	+	NA
Pf3D7_05_v3	1254433	1254462	Pf3D7_05_v3-1254229-1254579__var-1	29	+	[ID=PF3D7_0530750;description=dolichol-phosphate mannosyltransferase subunit 3, putative;]
Pf3D7_05_v3	1254511	1254540	Pf3D7_05_v3-1254229-1254579__var-2	29	+	[ID=PF3D7_0530750;description=dolichol-phosphate mannosyltransferase subunit 3, putative;]
Pf3D7_05_v3	1254742	1254771	Pf3D7_05_v3-1254646-1254808__var-0	29	+	[ID=PF3D7_0530750;description=dolichol-phosphate mannosyltransferase subunit 3, putative;]
Pf3D7_05_v3	1254771	1254808	Pf3D7_05_v3-1254646-1254808__var-1	37	+	[ID=PF3D7_0530750;description=dolichol-phosphate mannosyltransferase subunit 3, putative;]
Pf3D7_05_v3	1254902	1254938	Pf3D7_05_v3-1254902-1255102__var-0	36	+	NA
Pf3D7_05_v3	1254939	1254970	Pf3D7_05_v3-1254902-1255102__var-1	31	+	NA
Pf3D7_05_v3	1254983	1255014	Pf3D7_05_v3-1254902-1255102__var-2	31	+	NA
Pf3D7_05_v3	1255168	1255192	Pf3D7_05_v3-1255168-1255381__var-0	24	+	NA
Pf3D7_05_v3	1255321	1255350	Pf3D7_05_v3-1255168-1255381__var-1	29	+	[ID=PF3D7_0530800;description=CPW-WPC family protein;]
Pf3D7_05_v3	1255615	1255644	Pf3D7_05_v3-1255569-1255769__var-0	29	+	[ID=PF3D7_0530800;description=CPW-WPC family protein;]
Pf3D7_05_v3	1255730	1255759	Pf3D7_05_v3-1255569-1255769__var-1	29	+	[ID=PF3D7_0530800;description=CPW-WPC family protein;]
Pf3D7_05_v3	1255902	1255931	Pf3D7_05_v3-1255854-1256001__var-0	29	+	[ID=PF3D7_0530800;description=CPW-WPC family protein;]
Pf3D7_05_v3	1256147	1256176	Pf3D7_05_v3-1256054-1256454__var-0	29	+	[ID=PF3D7_0530800;description=CPW-WPC family protein;]
Pf3D7_05_v3	1256195	1256224	Pf3D7_05_v3-1256054-1256454__var-1	29	+	[ID=PF3D7_0530800;description=CPW-WPC family protein;]
Pf3D7_05_v3	1256348	1256377	Pf3D7_05_v3-1256054-1256454__var-2	29	+	[ID=PF3D7_0530800;description=CPW-WPC family protein;]
Pf3D7_05_v3	1256725	1256770	Pf3D7_05_v3-1256725-1257075__var-0	45	+	[ID=PF3D7_0530800;description=CPW-WPC family protein;]
Pf3D7_05_v3	1256753	1256798	Pf3D7_05_v3-1256725-1257075__var-1	45	+	[ID=PF3D7_0530800;description=CPW-WPC family protein;]
Pf3D7_05_v3	1256805	1256850	Pf3D7_05_v3-1256725-1257075__var-2	45	+	[ID=PF3D7_0530800;description=CPW-WPC family protein;]
Pf3D7_05_v3	1256862	1256907	Pf3D7_05_v3-1256725-1257075__var-3	45	+	[ID=PF3D7_0530800;description=CPW-WPC family protein;]
Pf3D7_05_v3	1256919	1256964	Pf3D7_05_v3-1256725-1257075__var-4	45	+	[ID=PF3D7_0530800;description=CPW-WPC family protein;]
Pf3D7_05_v3	1256961	1257019	Pf3D7_05_v3-1256725-1257075__var-5	58	+	[ID=PF3D7_0530800;description=CPW-WPC family protein;]
Pf3D7_05_v3	1257356	1257418	Pf3D7_05_v3-1257356-1257551__var-0	62	+	NA
Pf3D7_05_v3	1257437	1257500	Pf3D7_05_v3-1257356-1257551__var-1	63	+	NA
Pf3D7_05_v3	1257828	1257919	Pf3D7_05_v3-1257706-1260256__var-0	91	+	[ID=PF3D7_0530900;description=formin 1;]
Pf3D7_05_v3	1257975	1258036	Pf3D7_05_v3-1257706-1260256__var-1	61	+	[ID=PF3D7_0530900;description=formin 1;]
Pf3D7_05_v3	1258412	1258473	Pf3D7_05_v3-1257706-1260256__var-2	61	+	[ID=PF3D7_0530900;description=formin 1;]
Pf3D7_05_v3	1258616	1258677	Pf3D7_05_v3-1257706-1260256__var-3	61	+	[ID=PF3D7_0530900;description=formin 1;]
Pf3D7_05_v3	1259069	1259130	Pf3D7_05_v3-1257706-1260256__var-4	61	+	[ID=PF3D7_0530900;description=formin 1;]
Pf3D7_05_v3	1259531	1259622	Pf3D7_05_v3-1257706-1260256__var-5	91	+	[ID=PF3D7_0530900;description=formin 1;]
Pf3D7_05_v3	1259827	1259918	Pf3D7_05_v3-1257706-1260256__var-6	91	+	[ID=PF3D7_0530900;description=formin 1;]
Pf3D7_05_v3	1260014	1260080	Pf3D7_05_v3-1257706-1260256__var-7	66	+	[ID=PF3D7_0530900;description=formin 1;]
Pf3D7_05_v3	1260438	1260482	Pf3D7_05_v3-1260401-1262101__var-00	44	+	[ID=PF3D7_0530900;description=formin 1;]
Pf3D7_05_v3	1260473	1260514	Pf3D7_05_v3-1260401-1262101__var-01	41	+	[ID=PF3D7_0530900;description=formin 1;]
Pf3D7_05_v3	1260547	1260588	Pf3D7_05_v3-1260401-1262101__var-02	41	+	[ID=PF3D7_0530900;description=formin 1;]
Pf3D7_05_v3	1260643	1260684	Pf3D7_05_v3-1260401-1262101__var-03	41	+	[ID=PF3D7_0530900;description=formin 1;]
Pf3D7_05_v3	1261040	1261094	Pf3D7_05_v3-1260401-1262101__var-04	54	+	[ID=PF3D7_0530900;description=formin 1;]
Pf3D7_05_v3	1261129	1261170	Pf3D7_05_v3-1260401-1262101__var-05	41	+	[ID=PF3D7_0530900;description=formin 1;]
Pf3D7_05_v3	1261175	1261216	Pf3D7_05_v3-1260401-1262101__var-06	41	+	[ID=PF3D7_0530900;description=formin 1;]
Pf3D7_05_v3	1261343	1261384	Pf3D7_05_v3-1260401-1262101__var-07	41	+	[ID=PF3D7_0530900;description=formin 1;]
Pf3D7_05_v3	1261469	1261510	Pf3D7_05_v3-1260401-1262101__var-08	41	+	[ID=PF3D7_0530900;description=formin 1;]
Pf3D7_05_v3	1261497	1261538	Pf3D7_05_v3-1260401-1262101__var-09	41	+	[ID=PF3D7_0530900;description=formin 1;]
Pf3D7_05_v3	1261785	1261829	Pf3D7_05_v3-1260401-1262101__var-10	44	+	[ID=PF3D7_0530900;description=formin 1;]
Pf3D7_05_v3	1261813	1261854	Pf3D7_05_v3-1260401-1262101__var-11	41	+	[ID=PF3D7_0530900;description=formin 1;]
Pf3D7_05_v3	1261846	1261887	Pf3D7_05_v3-1260401-1262101__var-12	41	+	[ID=PF3D7_0530900;description=formin 1;]
Pf3D7_05_v3	1261944	1261987	Pf3D7_05_v3-1260401-1262101__var-13	43	+	[ID=PF3D7_0530900;description=formin 1;]
Pf3D7_05_v3	1262253	1262282	Pf3D7_05_v3-1262231-1262781__var-0	29	+	[ID=PF3D7_0530900;description=formin 1;]
Pf3D7_05_v3	1262537	1262566	Pf3D7_05_v3-1262231-1262781__var-1	29	+	[ID=PF3D7_0530900;description=formin 1;]
Pf3D7_05_v3	1262575	1262604	Pf3D7_05_v3-1262231-1262781__var-2	29	+	[ID=PF3D7_0530900;description=formin 1;]
Pf3D7_05_v3	1262654	1262691	Pf3D7_05_v3-1262231-1262781__var-3	37	+	[ID=PF3D7_0530900;description=formin 1;]
Pf3D7_05_v3	1262756	1262781	Pf3D7_05_v3-1262231-1262781__var-4	25	+	[ID=PF3D7_0530900;description=formin 1;]
Pf3D7_05_v3	1262759	1262788	Pf3D7_05_v3-1262231-1262796__var-4	29	+	[ID=PF3D7_0530900;description=formin 1;]
Pf3D7_05_v3	1263153	1263182	Pf3D7_05_v3-1262951-1264251__var-0	29	+	[ID=PF3D7_0530900;description=formin 1;]
Pf3D7_05_v3	1263186	1263215	Pf3D7_05_v3-1262951-1264251__var-1	29	+	[ID=PF3D7_0530900;description=formin 1;]
Pf3D7_05_v3	1263220	1263249	Pf3D7_05_v3-1262951-1264251__var-2	29	+	[ID=PF3D7_0530900;description=formin 1;]
Pf3D7_05_v3	1263356	1263385	Pf3D7_05_v3-1262951-1264251__var-3	29	+	[ID=PF3D7_0530900;description=formin 1;]
Pf3D7_05_v3	1263392	1263421	Pf3D7_05_v3-1262951-1264251__var-4	29	+	[ID=PF3D7_0530900;description=formin 1;]
Pf3D7_05_v3	1263429	1263458	Pf3D7_05_v3-1262951-1264251__var-5	29	+	[ID=PF3D7_0530900;description=formin 1;]
Pf3D7_05_v3	1263719	1263748	Pf3D7_05_v3-1262951-1264251__var-6	29	+	[ID=PF3D7_0530900;description=formin 1;]
Pf3D7_05_v3	1263811	1263840	Pf3D7_05_v3-1262951-1264251__var-7	29	+	[ID=PF3D7_0530900;description=formin 1;]
Pf3D7_05_v3	1264385	1264414	Pf3D7_05_v3-1264371-1265071__var-0	29	+	[ID=PF3D7_0530900;description=formin 1;]
Pf3D7_05_v3	1264419	1264448	Pf3D7_05_v3-1264371-1265071__var-1	29	+	[ID=PF3D7_0530900;description=formin 1;]
Pf3D7_05_v3	1264482	1264511	Pf3D7_05_v3-1264371-1265071__var-2	29	+	[ID=PF3D7_0530900;description=formin 1;]
Pf3D7_05_v3	1264862	1264891	Pf3D7_05_v3-1264371-1265071__var-3	29	+	[ID=PF3D7_0530900;description=formin 1;]
Pf3D7_05_v3	1264974	1265010	Pf3D7_05_v3-1264371-1265071__var-4	36	+	[ID=PF3D7_0530900;description=formin 1;]
Pf3D7_05_v3	1265625	1265654	Pf3D7_05_v3-1265173-1265773__var-0	29	+	[ID=PF3D7_0530900;description=formin 1;]
Pf3D7_05_v3	1265682	1265711	Pf3D7_05_v3-1265173-1265773__var-1	29	+	[ID=PF3D7_0530900;description=formin 1;]
Pf3D7_05_v3	1265759	1265779	Pf3D7_05_v3-1265173-1265779__var-2	20	+	NA
Pf3D7_05_v3	1266206	1266235	Pf3D7_05_v3-1266147-1266392__var-0	29	+	NA
Pf3D7_05_v3	1266363	1266392	Pf3D7_05_v3-1266147-1266392__var-1	29	+	NA
Pf3D7_05_v3	1266988	1267017	Pf3D7_05_v3-1266980-1267230__var-0	29	+	NA
Pf3D7_05_v3	1266988	1267017	Pf3D7_05_v3-1266980-1267230__var-0	29	+	NA
Pf3D7_05_v3	1267135	1267164	Pf3D7_05_v3-1266980-1267230__var-1	29	+	NA
Pf3D7_05_v3	1267135	1267164	Pf3D7_05_v3-1266980-1267230__var-1	29	+	NA
Pf3D7_05_v3	1267452	1267481	Pf3D7_05_v3-1267393-1267643__var-0	29	+	[ID=PF3D7_0531000;description=SURF1 domain-containing protein, putative;]
Pf3D7_05_v3	1267570	1267612	Pf3D7_05_v3-1267393-1267664__var-1	42	+	[ID=PF3D7_0531000;description=SURF1 domain-containing protein, putative;]
Pf3D7_05_v3	1267582	1267643	Pf3D7_05_v3-1267393-1267643__var-1	61	+	[ID=PF3D7_0531000;description=SURF1 domain-containing protein, putative;]
Pf3D7_05_v3	1267724	1267756	Pf3D7_05_v3-1267724-1268115__var-0	32	+	[ID=PF3D7_0531000;description=SURF1 domain-containing protein, putative;]
Pf3D7_05_v3	1267973	1268002	Pf3D7_05_v3-1267724-1268024__var-1	29	+	[ID=PF3D7_0531000;description=SURF1 domain-containing protein, putative;]
Pf3D7_05_v3	1268167	1268194	Pf3D7_05_v3-1268167-1269567__var-00	27	+	[ID=PF3D7_0531000;description=SURF1 domain-containing protein, putative;]
Pf3D7_05_v3	1268195	1268224	Pf3D7_05_v3-1268167-1269567__var-01	29	+	[ID=PF3D7_0531000;description=SURF1 domain-containing protein, putative;]
Pf3D7_05_v3	1268419	1268448	Pf3D7_05_v3-1268167-1269567__var-02	29	+	[ID=PF3D7_0531000;description=SURF1 domain-containing protein, putative;]
Pf3D7_05_v3	1268511	1268540	Pf3D7_05_v3-1268167-1269567__var-03	29	+	[ID=PF3D7_0531000;description=SURF1 domain-containing protein, putative;]
Pf3D7_05_v3	1268702	1268731	Pf3D7_05_v3-1268167-1269567__var-04	29	+	[ID=PF3D7_0531000;description=SURF1 domain-containing protein, putative;]
Pf3D7_05_v3	1268989	1269019	Pf3D7_05_v3-1268167-1269567__var-05	30	+	[ID=PF3D7_0531000;description=SURF1 domain-containing protein, putative;]
Pf3D7_05_v3	1269222	1269251	Pf3D7_05_v3-1268167-1269567__var-06	29	+	[ID=PF3D7_0531000;description=SURF1 domain-containing protein, putative;]
Pf3D7_05_v3	1269255	1269284	Pf3D7_05_v3-1268167-1269567__var-07	29	+	[ID=PF3D7_0531000;description=SURF1 domain-containing protein, putative;]
Pf3D7_05_v3	1269415	1269444	Pf3D7_05_v3-1268167-1269567__var-08	29	+	[ID=PF3D7_0531000;description=SURF1 domain-containing protein, putative;]
Pf3D7_05_v3	1269494	1269523	Pf3D7_05_v3-1268167-1269567__var-09	29	+	[ID=PF3D7_0531000;description=SURF1 domain-containing protein, putative;]
Pf3D7_05_v3	1269839	1269865	Pf3D7_05_v3-1269839-1270039__var-0	26	+	NA
Pf3D7_05_v3	1269855	1269891	Pf3D7_05_v3-1269839-1270061__var-1	36	+	NA
Pf3D7_05_v3	1269910	1269939	Pf3D7_05_v3-1269839-1270039__var-1	29	+	NA
Pf3D7_05_v3	1269976	1270014	Pf3D7_05_v3-1269839-1270039__var-2	38	+	NA
Pf3D7_05_v3	1270006	1270035	Pf3D7_05_v3-1269839-1270039__var-3	29	+	NA
Pf3D7_05_v3	1270209	1270253	Pf3D7_05_v3-1270121-1270285__var-0	44	+	NA
Pf3D7_05_v3	1270435	1270464	Pf3D7_05_v3-1270347-1271097__var-0	29	+	[ID=PF3D7_0531100;description=conserved Plasmodium protein, unknown function;]
Pf3D7_05_v3	1270739	1270768	Pf3D7_05_v3-1270347-1271097__var-1	29	+	[ID=PF3D7_0531100;description=conserved Plasmodium protein, unknown function;]
Pf3D7_05_v3	1270795	1270824	Pf3D7_05_v3-1270347-1271097__var-2	29	+	[ID=PF3D7_0531100;description=conserved Plasmodium protein, unknown function;]
Pf3D7_05_v3	1270937	1270966	Pf3D7_05_v3-1270347-1271097__var-3	29	+	[ID=PF3D7_0531100;description=conserved Plasmodium protein, unknown function;]
Pf3D7_05_v3	1270957	1270986	Pf3D7_05_v3-1270347-1271097__var-4	29	+	[ID=PF3D7_0531100;description=conserved Plasmodium protein, unknown function;]
Pf3D7_05_v3	1271070	1271097	Pf3D7_05_v3-1270347-1271097__var-5	27	+	[ID=PF3D7_0531100;description=conserved Plasmodium protein, unknown function;]
Pf3D7_05_v3	1271144	1271173	Pf3D7_05_v3-1270347-1271561__var-04	29	+	[ID=PF3D7_0531100;description=conserved Plasmodium protein, unknown function;]
Pf3D7_05_v3	1271176	1271205	Pf3D7_05_v3-1270347-1271561__var-05	29	+	[ID=PF3D7_0531100;description=conserved Plasmodium protein, unknown function;]
Pf3D7_05_v3	1271199	1271228	Pf3D7_05_v3-1270347-1271561__var-06	29	+	[ID=PF3D7_0531100;description=conserved Plasmodium protein, unknown function;]
Pf3D7_05_v3	1271234	1271272	Pf3D7_05_v3-1270347-1271561__var-07	38	+	[ID=PF3D7_0531100;description=conserved Plasmodium protein, unknown function;]
Pf3D7_05_v3	1271345	1271374	Pf3D7_05_v3-1270347-1271561__var-08	29	+	[ID=PF3D7_0531100;description=conserved Plasmodium protein, unknown function;]
Pf3D7_05_v3	1271515	1271544	Pf3D7_05_v3-1271197-1271547__var-3	29	+	[ID=PF3D7_0531100;description=conserved Plasmodium protein, unknown function;]
Pf3D7_05_v3	1271540	1271561	Pf3D7_05_v3-1270347-1271561__var-09	21	+	[ID=PF3D7_0531100;description=conserved Plasmodium protein, unknown function;]
Pf3D7_05_v3	1271675	1271714	Pf3D7_05_v3-1271623-1273423__var-00	39	+	[ID=PF3D7_0531100;description=conserved Plasmodium protein, unknown function;]
Pf3D7_05_v3	1271837	1271881	Pf3D7_05_v3-1271623-1273423__var-01	44	+	[ID=PF3D7_0531100;description=conserved Plasmodium protein, unknown function;]
Pf3D7_05_v3	1271870	1271909	Pf3D7_05_v3-1271623-1273423__var-02	39	+	[ID=PF3D7_0531100;description=conserved Plasmodium protein, unknown function;]
Pf3D7_05_v3	1271900	1271940	Pf3D7_05_v3-1271623-1273423__var-03	40	+	[ID=PF3D7_0531100;description=conserved Plasmodium protein, unknown function;]
Pf3D7_05_v3	1271930	1271969	Pf3D7_05_v3-1271623-1273423__var-04	39	+	[ID=PF3D7_0531100;description=conserved Plasmodium protein, unknown function;]
Pf3D7_05_v3	1271976	1272015	Pf3D7_05_v3-1271623-1273423__var-05	39	+	[ID=PF3D7_0531100;description=conserved Plasmodium protein, unknown function;]
Pf3D7_05_v3	1272042	1272081	Pf3D7_05_v3-1271623-1273423__var-06	39	+	[ID=PF3D7_0531100;description=conserved Plasmodium protein, unknown function;]
Pf3D7_05_v3	1272345	1272384	Pf3D7_05_v3-1271623-1273423__var-07	39	+	[ID=PF3D7_0531100;description=conserved Plasmodium protein, unknown function;]
Pf3D7_05_v3	1272378	1272417	Pf3D7_05_v3-1271623-1273423__var-08	39	+	[ID=PF3D7_0531100;description=conserved Plasmodium protein, unknown function;]
Pf3D7_05_v3	1272405	1272444	Pf3D7_05_v3-1271623-1273451__var-09	39	+	[ID=PF3D7_0531100;description=conserved Plasmodium protein, unknown function;]
Pf3D7_05_v3	1272429	1272468	Pf3D7_05_v3-1271623-1273423__var-09	39	+	[ID=PF3D7_0531100;description=conserved Plasmodium protein, unknown function;]
Pf3D7_05_v3	1272502	1272546	Pf3D7_05_v3-1271623-1273423__var-10	44	+	[ID=PF3D7_0531100;description=conserved Plasmodium protein, unknown function;]
Pf3D7_05_v3	1272564	1272603	Pf3D7_05_v3-1271623-1273423__var-11	39	+	[ID=PF3D7_0531100;description=conserved Plasmodium protein, unknown function;]
Pf3D7_05_v3	1272888	1272927	Pf3D7_05_v3-1271623-1273423__var-12	39	+	[ID=PF3D7_0531100;description=conserved Plasmodium protein, unknown function;]
Pf3D7_05_v3	1273397	1273451	Pf3D7_05_v3-1271623-1273451__var-14	54	+	[ID=PF3D7_0531100;description=conserved Plasmodium protein, unknown function;]
Pf3D7_05_v3	1273634	1273663	Pf3D7_05_v3-1273526-1275226__var-00	29	+	[ID=PF3D7_0531100;description=conserved Plasmodium protein, unknown function;]
Pf3D7_05_v3	1273935	1273964	Pf3D7_05_v3-1273526-1275226__var-01	29	+	[ID=PF3D7_0531100;description=conserved Plasmodium protein, unknown function;]
Pf3D7_05_v3	1274250	1274305	Pf3D7_05_v3-1273526-1275226__var-02	55	+	[ID=PF3D7_0531100;description=conserved Plasmodium protein, unknown function;]
Pf3D7_05_v3	1274433	1274484	Pf3D7_05_v3-1273526-1275226__var-03	51	+	[ID=PF3D7_0531100;description=conserved Plasmodium protein, unknown function;]
Pf3D7_05_v3	1274484	1274513	Pf3D7_05_v3-1273526-1275226__var-04	29	+	[ID=PF3D7_0531100;description=conserved Plasmodium protein, unknown function;]
Pf3D7_05_v3	1274536	1274567	Pf3D7_05_v3-1273526-1275226__var-05	31	+	[ID=PF3D7_0531100;description=conserved Plasmodium protein, unknown function;]
Pf3D7_05_v3	1274701	1274730	Pf3D7_05_v3-1273526-1275226__var-06	29	+	[ID=PF3D7_0531100;description=conserved Plasmodium protein, unknown function;]
Pf3D7_05_v3	1274722	1274751	Pf3D7_05_v3-1273526-1275226__var-07	29	+	[ID=PF3D7_0531100;description=conserved Plasmodium protein, unknown function;]
Pf3D7_05_v3	1274767	1274796	Pf3D7_05_v3-1273526-1275226__var-08	29	+	[ID=PF3D7_0531100;description=conserved Plasmodium protein, unknown function;]
Pf3D7_05_v3	1274854	1274883	Pf3D7_05_v3-1273526-1275226__var-09	29	+	[ID=PF3D7_0531100;description=conserved Plasmodium protein, unknown function;]
Pf3D7_05_v3	1274972	1275001	Pf3D7_05_v3-1273526-1275226__var-10	29	+	[ID=PF3D7_0531100;description=conserved Plasmodium protein, unknown function;]
Pf3D7_05_v3	1275019	1275055	Pf3D7_05_v3-1273526-1275226__var-11	36	+	[ID=PF3D7_0531100;description=conserved Plasmodium protein, unknown function;]
Pf3D7_05_v3	1275071	1275100	Pf3D7_05_v3-1273526-1275226__var-12	29	+	[ID=PF3D7_0531100;description=conserved Plasmodium protein, unknown function;]
Pf3D7_05_v3	1275202	1275226	Pf3D7_05_v3-1273526-1275226__var-13	24	+	[ID=PF3D7_0531100;description=conserved Plasmodium protein, unknown function;]
Pf3D7_05_v3	1275205	1275234	Pf3D7_05_v3-1273526-1275248__var-13	29	+	[ID=PF3D7_0531100;description=conserved Plasmodium protein, unknown function;]
Pf3D7_05_v3	1275346	1275375	Pf3D7_05_v3-1275302-1275552__var-0	29	+	[ID=PF3D7_0531100;description=conserved Plasmodium protein, unknown function;]
Pf3D7_05_v3	1275498	1275527	Pf3D7_05_v3-1275302-1275552__var-1	29	+	[ID=PF3D7_0531100;description=conserved Plasmodium protein, unknown function;]
Pf3D7_05_v3	1275521	1275550	Pf3D7_05_v3-1275302-1275552__var-2	29	+	[ID=PF3D7_0531100;description=conserved Plasmodium protein, unknown function;]
Pf3D7_05_v3	1275754	1275815	Pf3D7_05_v3-1275663-1275815__var-0	61	+	[ID=PF3D7_0531100;description=conserved Plasmodium protein, unknown function;]
Pf3D7_05_v3	1276023	1276056	Pf3D7_05_v3-1276023-1276204__var-0	33	+	[ID=PF3D7_0531100;description=conserved Plasmodium protein, unknown function;]
Pf3D7_05_v3	1276076	1276105	Pf3D7_05_v3-1276023-1276204__var-1	29	+	[ID=PF3D7_0531100;description=conserved Plasmodium protein, unknown function;]
Pf3D7_05_v3	1276156	1276185	Pf3D7_05_v3-1276023-1276204__var-2	29	+	[ID=PF3D7_0531100;description=conserved Plasmodium protein, unknown function;]
Pf3D7_05_v3	1276371	1276400	Pf3D7_05_v3-1276272-1276522__var-0	29	+	[ID=PF3D7_0531100;description=conserved Plasmodium protein, unknown function;]
Pf3D7_05_v3	1276460	1276489	Pf3D7_05_v3-1276272-1276522__var-1	29	+	[ID=PF3D7_0531100;description=conserved Plasmodium protein, unknown function;]
Pf3D7_05_v3	1276501	1276530	Pf3D7_05_v3-1276272-1276561__var-2	29	+	[ID=PF3D7_0531100;description=conserved Plasmodium protein, unknown function;]
Pf3D7_05_v3	1276533	1276561	Pf3D7_05_v3-1276272-1276561__var-3	28	+	[ID=PF3D7_0531100;description=conserved Plasmodium protein, unknown function;]
Pf3D7_05_v3	1276730	1276759	Pf3D7_05_v3-1276705-1276852__var-0	29	+	[ID=PF3D7_0531100;description=conserved Plasmodium protein, unknown function;]
Pf3D7_05_v3	1276778	1276807	Pf3D7_05_v3-1276705-1276852__var-1	29	+	[ID=PF3D7_0531100;description=conserved Plasmodium protein, unknown function;]
Pf3D7_05_v3	1276819	1276848	Pf3D7_05_v3-1276705-1276852__var-2	29	+	[ID=PF3D7_0531100;description=conserved Plasmodium protein, unknown function;]
Pf3D7_05_v3	1276978	1277007	Pf3D7_05_v3-1276958-1277258__var-0	29	+	[ID=PF3D7_0531100;description=conserved Plasmodium protein, unknown function;]
Pf3D7_05_v3	1277006	1277035	Pf3D7_05_v3-1276958-1277258__var-1	29	+	[ID=PF3D7_0531100;description=conserved Plasmodium protein, unknown function;]
Pf3D7_05_v3	1277225	1277254	Pf3D7_05_v3-1276958-1277258__var-2	29	+	[ID=PF3D7_0531100;description=conserved Plasmodium protein, unknown function;]
Pf3D7_05_v3	1277322	1277373	Pf3D7_05_v3-1276958-1277433__var-3	51	+	[ID=PF3D7_0531100;description=conserved Plasmodium protein, unknown function;]
Pf3D7_05_v3	1277366	1277395	Pf3D7_05_v3-1276958-1277433__var-4	29	+	[ID=PF3D7_0531100;description=conserved Plasmodium protein, unknown function;]
Pf3D7_05_v3	1277404	1277433	Pf3D7_05_v3-1276958-1277433__var-5	29	+	[ID=PF3D7_0531100;description=conserved Plasmodium protein, unknown function;]
Pf3D7_05_v3	1277579	1277614	Pf3D7_05_v3-1277579-1278516__var-0	35	+	[ID=PF3D7_0531100;description=conserved Plasmodium protein, unknown function;]
Pf3D7_05_v3	1277624	1277653	Pf3D7_05_v3-1277579-1278479__var-1	29	+	[ID=PF3D7_0531100;description=conserved Plasmodium protein, unknown function;]
Pf3D7_05_v3	1277667	1277696	Pf3D7_05_v3-1277579-1278479__var-2	29	+	[ID=PF3D7_0531100;description=conserved Plasmodium protein, unknown function;]
Pf3D7_05_v3	1277723	1277756	Pf3D7_05_v3-1277579-1278479__var-3	33	+	[ID=PF3D7_0531100;description=conserved Plasmodium protein, unknown function;]
Pf3D7_05_v3	1278370	1278399	Pf3D7_05_v3-1277579-1278479__var-4	29	+	[ID=PF3D7_0531100;description=conserved Plasmodium protein, unknown function;]
Pf3D7_05_v3	1278397	1278426	Pf3D7_05_v3-1277579-1278479__var-5	29	+	[ID=PF3D7_0531100;description=conserved Plasmodium protein, unknown function;]
Pf3D7_05_v3	1279391	1279411	Pf3D7_05_v3-1279281-1279411__var-0	20	+	NA
Pf3D7_05_v3	1279490	1279519	Pf3D7_05_v3-1279474-1279616__var-0	29	+	NA
Pf3D7_05_v3	1279560	1279589	Pf3D7_05_v3-1279474-1279616__var-1	29	+	NA
Pf3D7_05_v3	1279671	1279696	Pf3D7_05_v3-1279671-1279861__var-0	25	+	NA
Pf3D7_05_v3	1279779	1279808	Pf3D7_05_v3-1279671-1279861__var-1	29	+	NA
Pf3D7_05_v3	1279987	1280016	Pf3D7_05_v3-1279921-1280571__var-0	29	+	[ID=PF3D7_0531200;description=ribosomal protein S16, mitochondrial, putative;]
Pf3D7_05_v3	1280030	1280059	Pf3D7_05_v3-1279921-1280571__var-1	29	+	[ID=PF3D7_0531200;description=ribosomal protein S16, mitochondrial, putative;]
Pf3D7_05_v3	1280048	1280077	Pf3D7_05_v3-1279921-1280571__var-2	29	+	[ID=PF3D7_0531200;description=ribosomal protein S16, mitochondrial, putative;]
Pf3D7_05_v3	1280096	1280140	Pf3D7_05_v3-1279921-1280571__var-3	44	+	[ID=PF3D7_0531200;description=ribosomal protein S16, mitochondrial, putative;]
Pf3D7_05_v3	1280180	1280209	Pf3D7_05_v3-1279921-1280571__var-4	29	+	[ID=PF3D7_0531200;description=ribosomal protein S16, mitochondrial, putative;]
Pf3D7_05_v3	1280444	1280473	Pf3D7_05_v3-1279921-1280571__var-5	29	+	[ID=PF3D7_0531200;description=ribosomal protein S16, mitochondrial, putative;]
Pf3D7_05_v3	1280516	1280545	Pf3D7_05_v3-1279921-1280571__var-6	29	+	[ID=PF3D7_0531200;description=ribosomal protein S16, mitochondrial, putative;]
Pf3D7_05_v3	1280779	1280808	Pf3D7_05_v3-1280723-1280835__var-0	29	+	NA
Pf3D7_05_v3	1280815	1280835	Pf3D7_05_v3-1280723-1280835__var-1	20	+	NA
Pf3D7_05_v3	1281097	1281126	Pf3D7_05_v3-1281042-1281180__var-0	29	+	NA
Pf3D7_05_v3	1281256	1281285	Pf3D7_05_v3-1281242-1281367__var-0	29	+	NA
Pf3D7_05_v3	1281456	1281485	Pf3D7_05_v3-1281427-1282277__var-00	29	+	[ID=PF3D7_0531300;description=conserved Plasmodium protein, unknown function;]
Pf3D7_05_v3	1281456	1281485	Pf3D7_05_v3-1281427-1282277__var-00	29	+	[ID=PF3D7_0531300;description=conserved Plasmodium protein, unknown function;]
Pf3D7_05_v3	1281515	1281544	Pf3D7_05_v3-1281427-1282277__var-01	29	+	[ID=PF3D7_0531300;description=conserved Plasmodium protein, unknown function;]
Pf3D7_05_v3	1281515	1281544	Pf3D7_05_v3-1281427-1282277__var-01	29	+	[ID=PF3D7_0531300;description=conserved Plasmodium protein, unknown function;]
Pf3D7_05_v3	1281534	1281563	Pf3D7_05_v3-1281427-1282277__var-02	29	+	[ID=PF3D7_0531300;description=conserved Plasmodium protein, unknown function;]
Pf3D7_05_v3	1281534	1281563	Pf3D7_05_v3-1281427-1282277__var-02	29	+	[ID=PF3D7_0531300;description=conserved Plasmodium protein, unknown function;]
Pf3D7_05_v3	1281738	1281767	Pf3D7_05_v3-1281427-1282277__var-03	29	+	[ID=PF3D7_0531300;description=conserved Plasmodium protein, unknown function;]
Pf3D7_05_v3	1281738	1281767	Pf3D7_05_v3-1281427-1282277__var-03	29	+	[ID=PF3D7_0531300;description=conserved Plasmodium protein, unknown function;]
Pf3D7_05_v3	1281785	1281814	Pf3D7_05_v3-1281427-1282277__var-04	29	+	[ID=PF3D7_0531300;description=conserved Plasmodium protein, unknown function;]
Pf3D7_05_v3	1281785	1281814	Pf3D7_05_v3-1281427-1282277__var-04	29	+	[ID=PF3D7_0531300;description=conserved Plasmodium protein, unknown function;]
Pf3D7_05_v3	1281821	1281850	Pf3D7_05_v3-1281427-1282277__var-05	29	+	[ID=PF3D7_0531300;description=conserved Plasmodium protein, unknown function;]
Pf3D7_05_v3	1281821	1281850	Pf3D7_05_v3-1281427-1282277__var-05	29	+	[ID=PF3D7_0531300;description=conserved Plasmodium protein, unknown function;]
Pf3D7_05_v3	1281846	1281875	Pf3D7_05_v3-1281427-1282277__var-06	29	+	[ID=PF3D7_0531300;description=conserved Plasmodium protein, unknown function;]
Pf3D7_05_v3	1281846	1281875	Pf3D7_05_v3-1281427-1282277__var-06	29	+	[ID=PF3D7_0531300;description=conserved Plasmodium protein, unknown function;]
Pf3D7_05_v3	1281868	1281897	Pf3D7_05_v3-1281427-1282277__var-07	29	+	[ID=PF3D7_0531300;description=conserved Plasmodium protein, unknown function;]
Pf3D7_05_v3	1281868	1281897	Pf3D7_05_v3-1281427-1282277__var-07	29	+	[ID=PF3D7_0531300;description=conserved Plasmodium protein, unknown function;]
Pf3D7_05_v3	1281918	1281947	Pf3D7_05_v3-1281427-1282277__var-08	29	+	[ID=PF3D7_0531300;description=conserved Plasmodium protein, unknown function;]
Pf3D7_05_v3	1281918	1281947	Pf3D7_05_v3-1281427-1282277__var-08	29	+	[ID=PF3D7_0531300;description=conserved Plasmodium protein, unknown function;]
Pf3D7_05_v3	1282030	1282059	Pf3D7_05_v3-1281427-1282277__var-09	29	+	[ID=PF3D7_0531300;description=conserved Plasmodium protein, unknown function;]
Pf3D7_05_v3	1282030	1282059	Pf3D7_05_v3-1281427-1282277__var-09	29	+	[ID=PF3D7_0531300;description=conserved Plasmodium protein, unknown function;]
Pf3D7_05_v3	1282089	1282120	Pf3D7_05_v3-1281427-1282277__var-10	31	+	[ID=PF3D7_0531300;description=conserved Plasmodium protein, unknown function;]
Pf3D7_05_v3	1282089	1282120	Pf3D7_05_v3-1281427-1282277__var-10	31	+	[ID=PF3D7_0531300;description=conserved Plasmodium protein, unknown function;]
Pf3D7_05_v3	1282149	1282178	Pf3D7_05_v3-1281427-1282277__var-11	29	+	[ID=PF3D7_0531300;description=conserved Plasmodium protein, unknown function;]
Pf3D7_05_v3	1282149	1282178	Pf3D7_05_v3-1281427-1282277__var-11	29	+	[ID=PF3D7_0531300;description=conserved Plasmodium protein, unknown function;]
Pf3D7_05_v3	1282166	1282195	Pf3D7_05_v3-1281427-1282277__var-12	29	+	[ID=PF3D7_0531300;description=conserved Plasmodium protein, unknown function;]
Pf3D7_05_v3	1282166	1282195	Pf3D7_05_v3-1281427-1282277__var-12	29	+	[ID=PF3D7_0531300;description=conserved Plasmodium protein, unknown function;]
Pf3D7_05_v3	1282803	1282834	Pf3D7_05_v3-1282683-1284083__var-00	31	+	[ID=PF3D7_0531400;description=conserved Plasmodium protein, unknown function;]
Pf3D7_05_v3	1282998	1283042	Pf3D7_05_v3-1282683-1284083__var-01	44	+	[ID=PF3D7_0531400;description=conserved Plasmodium protein, unknown function;]
Pf3D7_05_v3	1283243	1283274	Pf3D7_05_v3-1282683-1284083__var-02	31	+	[ID=PF3D7_0531400;description=conserved Plasmodium protein, unknown function;]
Pf3D7_05_v3	1283344	1283375	Pf3D7_05_v3-1282683-1284083__var-03	31	+	[ID=PF3D7_0531400;description=conserved Plasmodium protein, unknown function;]
Pf3D7_05_v3	1283562	1283593	Pf3D7_05_v3-1282683-1284083__var-04	31	+	[ID=PF3D7_0531400;description=conserved Plasmodium protein, unknown function;]
Pf3D7_05_v3	1283595	1283626	Pf3D7_05_v3-1282683-1284083__var-05	31	+	[ID=PF3D7_0531400;description=conserved Plasmodium protein, unknown function;]
Pf3D7_05_v3	1283657	1283688	Pf3D7_05_v3-1282683-1284083__var-06	31	+	[ID=PF3D7_0531400;description=conserved Plasmodium protein, unknown function;]
Pf3D7_05_v3	1283697	1283728	Pf3D7_05_v3-1282683-1284083__var-07	31	+	[ID=PF3D7_0531400;description=conserved Plasmodium protein, unknown function;]
Pf3D7_05_v3	1283750	1283781	Pf3D7_05_v3-1282683-1284083__var-08	31	+	[ID=PF3D7_0531400;description=conserved Plasmodium protein, unknown function;]
Pf3D7_05_v3	1283779	1283835	Pf3D7_05_v3-1282683-1284083__var-09	56	+	[ID=PF3D7_0531400;description=conserved Plasmodium protein, unknown function;]
Pf3D7_05_v3	1283843	1283874	Pf3D7_05_v3-1282683-1284083__var-10	31	+	[ID=PF3D7_0531400;description=conserved Plasmodium protein, unknown function;]
Pf3D7_05_v3	1284063	1284083	Pf3D7_05_v3-1282683-1284083__var-11	20	+	[ID=PF3D7_0531400;description=conserved Plasmodium protein, unknown function;]
Pf3D7_05_v3	1284066	1284097	Pf3D7_05_v3-1282683-1284117__var-11	31	+	[ID=PF3D7_0531400;description=conserved Plasmodium protein, unknown function;]
Pf3D7_05_v3	1284087	1284117	Pf3D7_05_v3-1282683-1284117__var-12	30	+	[ID=PF3D7_0531400;description=conserved Plasmodium protein, unknown function;]
Pf3D7_05_v3	1284265	1284294	Pf3D7_05_v3-1284193-1284593__var-0	29	+	[ID=PF3D7_0531400;description=conserved Plasmodium protein, unknown function;]
Pf3D7_05_v3	1284370	1284410	Pf3D7_05_v3-1284193-1284593__var-1	40	+	[ID=PF3D7_0531400;description=conserved Plasmodium protein, unknown function;]
Pf3D7_05_v3	1284474	1284503	Pf3D7_05_v3-1284193-1284593__var-2	29	+	[ID=PF3D7_0531400;description=conserved Plasmodium protein, unknown function;]
Pf3D7_05_v3	1284529	1284558	Pf3D7_05_v3-1284193-1284593__var-3	29	+	[ID=PF3D7_0531400;description=conserved Plasmodium protein, unknown function;]
Pf3D7_05_v3	1284782	1284821	Pf3D7_05_v3-1284657-1286007__var-00	39	+	[ID=PF3D7_0531400;description=conserved Plasmodium protein, unknown function;]
Pf3D7_05_v3	1284823	1284854	Pf3D7_05_v3-1284657-1286007__var-01	31	+	[ID=PF3D7_0531400;description=conserved Plasmodium protein, unknown function;]
Pf3D7_05_v3	1284905	1284936	Pf3D7_05_v3-1284657-1286007__var-02	31	+	[ID=PF3D7_0531400;description=conserved Plasmodium protein, unknown function;]
Pf3D7_05_v3	1284943	1284982	Pf3D7_05_v3-1284657-1286007__var-03	39	+	[ID=PF3D7_0531400;description=conserved Plasmodium protein, unknown function;]
Pf3D7_05_v3	1284982	1285013	Pf3D7_05_v3-1284657-1286007__var-04	31	+	[ID=PF3D7_0531400;description=conserved Plasmodium protein, unknown function;]
Pf3D7_05_v3	1284999	1285030	Pf3D7_05_v3-1284657-1286007__var-05	31	+	[ID=PF3D7_0531400;description=conserved Plasmodium protein, unknown function;]
Pf3D7_05_v3	1285195	1285226	Pf3D7_05_v3-1284657-1286007__var-06	31	+	[ID=PF3D7_0531400;description=conserved Plasmodium protein, unknown function;]
Pf3D7_05_v3	1285255	1285286	Pf3D7_05_v3-1284657-1286007__var-07	31	+	[ID=PF3D7_0531400;description=conserved Plasmodium protein, unknown function;]
Pf3D7_05_v3	1285286	1285317	Pf3D7_05_v3-1284657-1286007__var-08	31	+	[ID=PF3D7_0531400;description=conserved Plasmodium protein, unknown function;]
Pf3D7_05_v3	1285347	1285378	Pf3D7_05_v3-1284657-1286007__var-09	31	+	[ID=PF3D7_0531400;description=conserved Plasmodium protein, unknown function;]
Pf3D7_05_v3	1285434	1285465	Pf3D7_05_v3-1284657-1286007__var-10	31	+	[ID=PF3D7_0531400;description=conserved Plasmodium protein, unknown function;]
Pf3D7_05_v3	1285466	1285497	Pf3D7_05_v3-1284657-1286007__var-11	31	+	[ID=PF3D7_0531400;description=conserved Plasmodium protein, unknown function;]
Pf3D7_05_v3	1285616	1285647	Pf3D7_05_v3-1284657-1286007__var-12	31	+	[ID=PF3D7_0531400;description=conserved Plasmodium protein, unknown function;]
Pf3D7_05_v3	1285646	1285677	Pf3D7_05_v3-1284657-1286007__var-13	31	+	[ID=PF3D7_0531400;description=conserved Plasmodium protein, unknown function;]
Pf3D7_05_v3	1285711	1285742	Pf3D7_05_v3-1284657-1286007__var-14	31	+	[ID=PF3D7_0531400;description=conserved Plasmodium protein, unknown function;]
Pf3D7_05_v3	1286802	1286840	Pf3D7_05_v3-1286723-1286853__var-0	38	+	NA
Pf3D7_05_v3	1287042	1287071	Pf3D7_05_v3-1286914-1287164__var-0	29	+	NA
Pf3D7_05_v3	1287144	1287171	Pf3D7_05_v3-1286914-1287171__var-1	27	+	NA
Pf3D7_05_v3	1287400	1287444	Pf3D7_05_v3-1287388-1287529__var-0	44	+	NA
Pf3D7_05_v3	1287450	1287529	Pf3D7_05_v3-1287388-1287529__var-1	79	+	NA
Pf3D7_05_v3	1288158	1288233	Pf3D7_05_v3-1288134-1288434__var-0	75	+	NA
Pf3D7_05_v3	1288247	1288345	Pf3D7_05_v3-1288134-1288434__var-1	98	+	NA
Pf3D7_05_v3	1288321	1288405	Pf3D7_05_v3-1288134-1288434__var-2	84	+	NA
Pf3D7_05_v3	1288380	1288434	Pf3D7_05_v3-1288134-1288434__var-3	54	+	NA
Pf3D7_05_v3	1288391	1288458	Pf3D7_05_v3-1288134-1288458__var-3	67	+	NA
Pf3D7_05_v3	1288858	1288886	Pf3D7_05_v3-1288858-1289158__var-0	28	+	[ID=PF3D7_0531500;description=unspecified product;]
Pf3D7_05_v3	1288876	1288947	Pf3D7_05_v3-1288858-1289158__var-1	71	+	[ID=PF3D7_0531500;description=unspecified product;]
Pf3D7_05_v3	1288935	1289029	Pf3D7_05_v3-1288858-1289158__var-2	94	+	[ID=PF3D7_0531500;description=unspecified product;]
Pf3D7_05_v3	1288993	1289076	Pf3D7_05_v3-1288858-1289258__var-4	83	+	[ID=PF3D7_0531500;description=unspecified product;]
Pf3D7_05_v3	1289099	1289175	Pf3D7_05_v3-1288858-1289258__var-5	76	+	[ID=PF3D7_0531500;description=unspecified product;]
Pf3D7_05_v3	1289171	1289200	Pf3D7_05_v3-1289171-1289611-for__var-0	29	+	[ID=PF3D7_0531500;description=unspecified product;]
Pf3D7_05_v3	1289195	1289249	Pf3D7_05_v3-1288858-1289258__var-6	54	+	[ID=PF3D7_0531500;description=unspecified product;]
Pf3D7_05_v3	1289199	1289250	Pf3D7_05_v3-1289171-1289611-for__var-1	51	+	[ID=PF3D7_0531500;description=unspecified product;]
Pf3D7_05_v3	1289238	1289312	Pf3D7_05_v3-1289171-1289611-for__var-2	74	+	[ID=PF3D7_0531500;description=unspecified product;]
Pf3D7_05_v3	1289300	1289343	Pf3D7_05_v3-1289171-1289611-for__var-3	43	+	[ID=PF3D7_0531500;description=unspecified product;]
Pf3D7_05_v3	1289379	1289433	Pf3D7_05_v3-1289171-1289611-for__var-4	54	+	NA
Pf3D7_05_v3	1289426	1289460	Pf3D7_05_v3-1289171-1289611-for__var-5	34	+	NA
Pf3D7_05_v3	1289477	1289600	Pf3D7_05_v3-1289171-1289611-for__var-6	123	+	NA
Pf3D7_05_v3	1289718	1289747	Pf3D7_05_v3-1289681-1290191-for__var-0	29	+	[ID=PF3D7_0531600;description=18S ribosomal RNA;]
Pf3D7_05_v3	1289770	1289812	Pf3D7_05_v3-1289681-1290191-for__var-1	42	+	[ID=PF3D7_0531600;description=18S ribosomal RNA;]
Pf3D7_05_v3	1289802	1289831	Pf3D7_05_v3-1289681-1290191-for__var-2	29	+	[ID=PF3D7_0531600;description=18S ribosomal RNA;]
Pf3D7_05_v3	1289856	1289897	Pf3D7_05_v3-1289681-1290191-for__var-3	41	+	[ID=PF3D7_0531600;description=18S ribosomal RNA;]
Pf3D7_05_v3	1289928	1289957	Pf3D7_05_v3-1289681-1290191-for__var-4	29	+	[ID=PF3D7_0531600;description=18S ribosomal RNA;]
Pf3D7_05_v3	1290235	1290264	Pf3D7_05_v3-1290211-1290931-for__var-0	29	+	[ID=PF3D7_0531600;description=18S ribosomal RNA;]
Pf3D7_05_v3	1290253	1290290	Pf3D7_05_v3-1290211-1290931-for__var-1	37	+	[ID=PF3D7_0531600;description=18S ribosomal RNA;]
Pf3D7_05_v3	1290279	1290340	Pf3D7_05_v3-1290211-1290931-for__var-2	61	+	[ID=PF3D7_0531600;description=18S ribosomal RNA;]
Pf3D7_05_v3	1290330	1290396	Pf3D7_05_v3-1290211-1290931-for__var-3	66	+	[ID=PF3D7_0531600;description=18S ribosomal RNA;]
Pf3D7_05_v3	1290414	1290443	Pf3D7_05_v3-1290211-1290931-for__var-4	29	+	[ID=PF3D7_0531600;description=18S ribosomal RNA;]
Pf3D7_05_v3	1290491	1290520	Pf3D7_05_v3-1290211-1290931-for__var-5	29	+	[ID=PF3D7_0531600;description=18S ribosomal RNA;]
Pf3D7_05_v3	1290696	1290725	Pf3D7_05_v3-1290211-1290931-for__var-6	29	+	[ID=PF3D7_0531600;description=18S ribosomal RNA;]
Pf3D7_05_v3	1290732	1290761	Pf3D7_05_v3-1290211-1290931-for__var-7	29	+	[ID=PF3D7_0531600;description=18S ribosomal RNA;]
Pf3D7_05_v3	1290886	1290915	Pf3D7_05_v3-1290211-1290931-for__var-8	29	+	[ID=PF3D7_0531600;description=18S ribosomal RNA;]
Pf3D7_05_v3	1291061	1291158	Pf3D7_05_v3-1291061-1291206-for__var-0	97	+	[ID=PF3D7_0531600;description=18S ribosomal RNA;]
Pf3D7_05_v3	1291146	1291202	Pf3D7_05_v3-1291061-1291206-for__var-1	56	+	[ID=PF3D7_0531600;description=18S ribosomal RNA;]
Pf3D7_05_v3	1291389	1291418	Pf3D7_05_v3-1291211-1292591-for__var-00	29	+	[ID=PF3D7_0531600;description=18S ribosomal RNA;]
Pf3D7_05_v3	1291487	1291516	Pf3D7_05_v3-1291211-1292591-for__var-01	29	+	[ID=PF3D7_0531600;description=18S ribosomal RNA;]
Pf3D7_05_v3	1291588	1291626	Pf3D7_05_v3-1291211-1292591-for__var-02	38	+	[ID=PF3D7_0531600;description=18S ribosomal RNA;]
Pf3D7_05_v3	1291693	1291794	Pf3D7_05_v3-1291211-1292591-for__var-03	101	+	[ID=PF3D7_0531700;description=unspecified product;]
Pf3D7_05_v3	1291806	1291858	Pf3D7_05_v3-1291211-1292591-for__var-04	52	+	[ID=PF3D7_0531700;description=unspecified product;]
Pf3D7_05_v3	1291863	1291914	Pf3D7_05_v3-1291211-1292591-for__var-05	51	+	[ID=PF3D7_0531700;description=unspecified product;]
Pf3D7_05_v3	1291939	1292007	Pf3D7_05_v3-1291211-1292591-for__var-06	68	+	[ID=PF3D7_0531700;description=unspecified product;]
Pf3D7_05_v3	1291995	1292057	Pf3D7_05_v3-1291211-1292591-for__var-07	62	+	[ID=PF3D7_0531700;description=unspecified product;],[ID=PF3D7_0531800;description=5.8S ribosomal RNA;]
Pf3D7_05_v3	1292172	1292201	Pf3D7_05_v3-1291211-1292591-for__var-08	29	+	[ID=PF3D7_0531800;description=5.8S ribosomal RNA;]
Pf3D7_05_v3	1292263	1292360	Pf3D7_05_v3-1291211-1292591-for__var-09	97	+	[ID=PF3D7_0531900;description=unspecified product;]
Pf3D7_05_v3	1292367	1292406	Pf3D7_05_v3-1291211-1292591-for__var-10	39	+	[ID=PF3D7_0531900;description=unspecified product;]
Pf3D7_05_v3	1292535	1292564	Pf3D7_05_v3-1291211-1292591-for__var-11	29	+	[ID=PF3D7_0532000;description=28S ribosomal RNA;]
Pf3D7_05_v3	1293544	1293573	Pf3D7_05_v3-1293521-1293666-for__var-0	29	+	[ID=PF3D7_0532000;description=28S ribosomal RNA;]
Pf3D7_05_v3	1293588	1293631	Pf3D7_05_v3-1293521-1293666-for__var-1	43	+	[ID=PF3D7_0532000;description=28S ribosomal RNA;]
Pf3D7_05_v3	1293627	1293656	Pf3D7_05_v3-1293521-1293666-for__var-2	29	+	[ID=PF3D7_0532000;description=28S ribosomal RNA;]
Pf3D7_05_v3	1293847	1293889	Pf3D7_05_v3-1293841-1294541-for__var-0	42	+	[ID=PF3D7_0532000;description=28S ribosomal RNA;]
Pf3D7_05_v3	1293884	1293919	Pf3D7_05_v3-1293841-1294541-for__var-1	35	+	[ID=PF3D7_0532000;description=28S ribosomal RNA;]
Pf3D7_05_v3	1294109	1294145	Pf3D7_05_v3-1293841-1294541-for__var-2	36	+	[ID=PF3D7_0532000;description=28S ribosomal RNA;]
Pf3D7_05_v3	1294167	1294196	Pf3D7_05_v3-1293841-1294541-for__var-3	29	+	[ID=PF3D7_0532000;description=28S ribosomal RNA;]
Pf3D7_05_v3	1294223	1294252	Pf3D7_05_v3-1293841-1294541-for__var-4	29	+	[ID=PF3D7_0532000;description=28S ribosomal RNA;]
Pf3D7_05_v3	1294322	1294360	Pf3D7_05_v3-1293841-1294541-for__var-5	38	+	[ID=PF3D7_0532000;description=28S ribosomal RNA;]
Pf3D7_05_v3	1294347	1294377	Pf3D7_05_v3-1293841-1294541-for__var-6	30	+	[ID=PF3D7_0532000;description=28S ribosomal RNA;]
Pf3D7_05_v3	1294364	1294393	Pf3D7_05_v3-1293841-1294541-for__var-7	29	+	[ID=PF3D7_0532000;description=28S ribosomal RNA;]
Pf3D7_05_v3	1294438	1294500	Pf3D7_05_v3-1293841-1294541-for__var-8	62	+	[ID=PF3D7_0532000;description=28S ribosomal RNA;]
Pf3D7_05_v3	1294636	1294758	Pf3D7_05_v3-1294631-1294821-for__var-0	122	+	[ID=PF3D7_0532000;description=28S ribosomal RNA;]
Pf3D7_05_v3	1294745	1294792	Pf3D7_05_v3-1294631-1294821-for__var-1	47	+	[ID=PF3D7_0532000;description=28S ribosomal RNA;]
Pf3D7_05_v3	1295752	1295806	Pf3D7_05_v3-1295751-1295811-for__var-0	54	+	[ID=PF3D7_0532000;description=28S ribosomal RNA;]
Pf3D7_05_v3	1295912	1295969	Pf3D7_05_v3-1295841-1296225-for__var-0	57	+	[ID=PF3D7_0532000;description=28S ribosomal RNA;]
Pf3D7_05_v3	1295978	1296039	Pf3D7_05_v3-1295841-1296225-for__var-1	61	+	[ID=PF3D7_0532000;description=28S ribosomal RNA;]
Pf3D7_05_v3	1296027	1296086	Pf3D7_05_v3-1295841-1296225-for__var-2	59	+	[ID=PF3D7_0532000;description=28S ribosomal RNA;]
Pf3D7_05_v3	1296154	1296225	Pf3D7_05_v3-1295841-1296225-for__var-3	71	+	[ID=PF3D7_0532000;description=28S ribosomal RNA;]
Pf3D7_05_v3	1296779	1296814	Pf3D7_05_v3-1296778-1298667__var-00	35	+	NA
Pf3D7_05_v3	1296822	1296853	Pf3D7_05_v3-1296778-1298667__var-01	31	+	NA
Pf3D7_05_v3	1296890	1296922	Pf3D7_05_v3-1296778-1298667__var-02	32	+	NA
Pf3D7_05_v3	1296929	1296960	Pf3D7_05_v3-1296778-1298667__var-03	31	+	NA
Pf3D7_05_v3	1296948	1296991	Pf3D7_05_v3-1296778-1298667__var-04	43	+	NA
Pf3D7_05_v3	1297000	1297031	Pf3D7_05_v3-1296778-1298667__var-05	31	+	NA
Pf3D7_05_v3	1297023	1297055	Pf3D7_05_v3-1296778-1298667__var-06	32	+	NA
Pf3D7_05_v3	1297077	1297108	Pf3D7_05_v3-1296778-1298667__var-07	31	+	NA
Pf3D7_05_v3	1297096	1297127	Pf3D7_05_v3-1296778-1298667__var-08	31	+	NA
Pf3D7_05_v3	1297138	1297169	Pf3D7_05_v3-1296778-1298667__var-09	31	+	NA
Pf3D7_05_v3	1297172	1297203	Pf3D7_05_v3-1296778-1298667__var-10	31	+	NA
Pf3D7_05_v3	1297365	1297408	Pf3D7_05_v3-1296778-1298667__var-11	43	+	NA
Pf3D7_05_v3	1297414	1297455	Pf3D7_05_v3-1296778-1298667__var-12	41	+	NA
Pf3D7_05_v3	1297571	1297602	Pf3D7_05_v3-1296778-1298667__var-13	31	+	NA
Pf3D7_05_v3	1297654	1297712	Pf3D7_05_v3-1296778-1298667__var-14	58	+	NA
Pf3D7_05_v3	1297731	1297802	Pf3D7_05_v3-1296778-1298667__var-15	71	+	NA
Pf3D7_05_v3	1297790	1297845	Pf3D7_05_v3-1296778-1298667__var-16	55	+	NA
Pf3D7_05_v3	1297849	1297880	Pf3D7_05_v3-1296778-1298667__var-17	31	+	NA
Pf3D7_05_v3	1297891	1298039	Pf3D7_05_v3-1296778-1298667__var-18	148	+	NA
Pf3D7_05_v3	1298245	1298289	Pf3D7_05_v3-1296778-1298667__var-19	44	+	NA
Pf3D7_05_v3	1298397	1298447	Pf3D7_05_v3-1296778-1298667__var-20	50	+	NA
Pf3D7_05_v3	1298541	1298579	Pf3D7_05_v3-1296778-1298667__var-21	38	+	NA
Pf3D7_05_v3	1298730	1298761	Pf3D7_05_v3-1298730-1298910__var-0	31	+	NA
Pf3D7_05_v3	1298761	1298790	Pf3D7_05_v3-1298730-1298910__var-1	29	+	NA
Pf3D7_05_v3	1298894	1298910	Pf3D7_05_v3-1298730-1298910__var-2	16	+	NA
Pf3D7_05_v3	1299024	1299078	Pf3D7_05_v3-1298985-1299098__var-0	54	+	NA
Pf3D7_05_v3	1299153	1299360	Pf3D7_05_v3-1299153-1299360__subseq-0	207	+	NA
Pf3D7_05_v3	1299497	1299566	Pf3D7_05_v3-1299497-1299958__var-0	69	+	NA
Pf3D7_05_v3	1299563	1299740	Pf3D7_05_v3-1299497-1299958__var-1	177	+	NA
Pf3D7_05_v3	1299752	1299798	Pf3D7_05_v3-1299497-1299958__var-2	46	+	NA
Pf3D7_05_v3	1299789	1299820	Pf3D7_05_v3-1299497-1299958__var-3	31	+	NA
Pf3D7_05_v3	1299885	1299922	Pf3D7_05_v3-1299497-1299958__var-4	37	+	NA
Pf3D7_05_v3	1300279	1300308	Pf3D7_05_v3-1300233-1300505__var-0	29	+	NA
Pf3D7_05_v3	1300420	1300449	Pf3D7_05_v3-1300233-1300505__var-1	29	+	NA
Pf3D7_05_v3	1300448	1300498	Pf3D7_05_v3-1300233-1300505__var-2	50	+	NA
Pf3D7_05_v3	1301064	1301083	Pf3D7_05_v3-1301064-1301326__var-0	19	+	NA
Pf3D7_05_v3	1301077	1301106	Pf3D7_05_v3-1301064-1301326__var-1	29	+	NA
Pf3D7_05_v3	1301131	1301160	Pf3D7_05_v3-1301064-1301326__var-2	29	+	NA
Pf3D7_05_v3	1301169	1301205	Pf3D7_05_v3-1301064-1301326__var-3	36	+	NA
Pf3D7_05_v3	1301205	1301234	Pf3D7_05_v3-1301064-1301326__var-4	29	+	[ID=PF3D7_0532100;description=early transcribed membrane protein 5;]
Pf3D7_05_v3	1301665	1301707	Pf3D7_05_v3-1301482-1301853__var-0	42	+	[ID=PF3D7_0532100;description=early transcribed membrane protein 5;]
Pf3D7_05_v3	1301729	1301758	Pf3D7_05_v3-1301482-1301853__var-1	29	+	[ID=PF3D7_0532100;description=early transcribed membrane protein 5;]
Pf3D7_05_v3	1301811	1301840	Pf3D7_05_v3-1301482-1301853__var-2	29	+	NA
Pf3D7_05_v3	1302209	1302262	Pf3D7_05_v3-1302209-1302431__var-0	53	+	NA
Pf3D7_05_v3	1302301	1302355	Pf3D7_05_v3-1302209-1302431__var-1	54	+	NA
Pf3D7_05_v3	1302373	1302412	Pf3D7_05_v3-1302209-1302431__var-2	39	+	NA
Pf3D7_05_v3	1302395	1302432	Pf3D7_05_v3-1302209-1302431__var-3	37	+	NA
Pf3D7_05_v3	1302491	1302506	Pf3D7_05_v3-1302491-1302736__var-0	15	+	NA
Pf3D7_05_v3	1302516	1302545	Pf3D7_05_v3-1302491-1302736__var-1	29	+	NA
Pf3D7_05_v3	1302550	1302579	Pf3D7_05_v3-1302491-1302736__var-2	29	+	NA
Pf3D7_05_v3	1302687	1302716	Pf3D7_05_v3-1302491-1302736__var-3	29	+	NA
Pf3D7_05_v3	1302943	1302972	Pf3D7_05_v3-1302910-1303055__var-0	29	+	NA
Pf3D7_05_v3	1302966	1302995	Pf3D7_05_v3-1302910-1303055__var-1	29	+	NA
Pf3D7_05_v3	1302985	1303055	Pf3D7_05_v3-1302910-1303055__var-2	70	+	NA
Pf3D7_05_v3	1303682	1303748	Pf3D7_05_v3-1303682-1304270__var-0	66	+	[ID=PF3D7_0532200;description=Plasmodium exported protein (PHISTc), unknown function;]
Pf3D7_05_v3	1303764	1303837	Pf3D7_05_v3-1303682-1304270__var-1	73	+	[ID=PF3D7_0532200;description=Plasmodium exported protein (PHISTc), unknown function;]
Pf3D7_05_v3	1303839	1303887	Pf3D7_05_v3-1303682-1304270__var-2	48	+	[ID=PF3D7_0532200;description=Plasmodium exported protein (PHISTc), unknown function;]
Pf3D7_05_v3	1303902	1303941	Pf3D7_05_v3-1303682-1304270__var-3	39	+	[ID=PF3D7_0532200;description=Plasmodium exported protein (PHISTc), unknown function;]
Pf3D7_05_v3	1303938	1303977	Pf3D7_05_v3-1303682-1304270__var-4	39	+	[ID=PF3D7_0532200;description=Plasmodium exported protein (PHISTc), unknown function;]
Pf3D7_05_v3	1304007	1304064	Pf3D7_05_v3-1303682-1304270__var-5	57	+	[ID=PF3D7_0532200;description=Plasmodium exported protein (PHISTc), unknown function;]
Pf3D7_05_v3	1304149	1304190	Pf3D7_05_v3-1303682-1304270__var-6	41	+	[ID=PF3D7_0532200;description=Plasmodium exported protein (PHISTc), unknown function;]
Pf3D7_05_v3	1304207	1304268	Pf3D7_05_v3-1303682-1304270__var-7	61	+	[ID=PF3D7_0532200;description=Plasmodium exported protein (PHISTc), unknown function;]
Pf3D7_05_v3	1304485	1304514	Pf3D7_05_v3-1304442-1304550__var-0	29	+	[ID=PF3D7_0532200;description=Plasmodium exported protein (PHISTc), unknown function;]
Pf3D7_05_v3	1304503	1304532	Pf3D7_05_v3-1304442-1304550__var-1	29	+	[ID=PF3D7_0532200;description=Plasmodium exported protein (PHISTc), unknown function;]
Pf3D7_05_v3	1305168	1305209	Pf3D7_05_v3-1305168-1305283__var-0	41	+	NA
Pf3D7_05_v3	1305205	1305238	Pf3D7_05_v3-1305168-1305283__var-1	33	+	NA
Pf3D7_05_v3	1305439	1305468	Pf3D7_05_v3-1305379-1305566__var-0	29	+	NA
Pf3D7_05_v3	1305636	1305741	Pf3D7_05_v3-1305636-1305868__var-0	105	+	NA
Pf3D7_05_v3	1305762	1305797	Pf3D7_05_v3-1305636-1305868__var-1	35	+	NA
Pf3D7_05_v3	1305834	1305868	Pf3D7_05_v3-1305636-1305868__var-2	34	+	NA
Pf3D7_05_v3	1305920	1305958	Pf3D7_05_v3-1305920-1306129__var-0	38	+	NA
Pf3D7_05_v3	1305971	1306000	Pf3D7_05_v3-1305920-1306129__var-1	29	+	NA
Pf3D7_05_v3	1306014	1306069	Pf3D7_05_v3-1305920-1306129__var-2	55	+	NA
Pf3D7_05_v3	1306092	1306129	Pf3D7_05_v3-1305920-1306129__var-3	37	+	NA
Pf3D7_05_v3	1306889	1307192	Pf3D7_05_v3-1306860-1307192__var-0	303	+	NA
Pf3D7_05_v3	1307457	1307482	Pf3D7_05_v3-1307457-1307763__var-0	25	+	NA
Pf3D7_05_v3	1307476	1307508	Pf3D7_05_v3-1307457-1307763__var-1	32	+	NA
Pf3D7_05_v3	1307531	1307560	Pf3D7_05_v3-1307457-1307763__var-2	29	+	NA
Pf3D7_05_v3	1307712	1307754	Pf3D7_05_v3-1307457-1307763__var-3	42	+	NA
Pf3D7_05_v3	1307973	1308096	Pf3D7_05_v3-1307947-1308096__var-0	123	+	NA
Pf3D7_05_v3	1308489	1308520	Pf3D7_05_v3-1308286-1308520__var-0	31	+	[ID=PF3D7_0532300;description=Plasmodium exported protein (PHISTb), unknown function;]
Pf3D7_05_v3	1308666	1308695	Pf3D7_05_v3-1308617-1309321__var-0	29	+	[ID=PF3D7_0532300;description=Plasmodium exported protein (PHISTb), unknown function;]
Pf3D7_05_v3	1308792	1308821	Pf3D7_05_v3-1308617-1309321__var-1	29	+	[ID=PF3D7_0532300;description=Plasmodium exported protein (PHISTb), unknown function;]
Pf3D7_05_v3	1308810	1308848	Pf3D7_05_v3-1308617-1309321__var-2	38	+	[ID=PF3D7_0532300;description=Plasmodium exported protein (PHISTb), unknown function;]
Pf3D7_05_v3	1308975	1309004	Pf3D7_05_v3-1308617-1309321__var-3	29	+	[ID=PF3D7_0532300;description=Plasmodium exported protein (PHISTb), unknown function;]
Pf3D7_05_v3	1309136	1309181	Pf3D7_05_v3-1308617-1309321__var-4	45	+	[ID=PF3D7_0532300;description=Plasmodium exported protein (PHISTb), unknown function;]
Pf3D7_05_v3	1309281	1309314	Pf3D7_05_v3-1308617-1309321__var-5	33	+	[ID=PF3D7_0532300;description=Plasmodium exported protein (PHISTb), unknown function;]
Pf3D7_05_v3	1309436	1309470	Pf3D7_05_v3-1309373-1309932__var-0	34	+	[ID=PF3D7_0532300;description=Plasmodium exported protein (PHISTb), unknown function;]
Pf3D7_05_v3	1309468	1309497	Pf3D7_05_v3-1309373-1309932__var-1	29	+	[ID=PF3D7_0532300;description=Plasmodium exported protein (PHISTb), unknown function;]
Pf3D7_05_v3	1309533	1309562	Pf3D7_05_v3-1309373-1309932__var-2	29	+	[ID=PF3D7_0532300;description=Plasmodium exported protein (PHISTb), unknown function;]
Pf3D7_05_v3	1309654	1309695	Pf3D7_05_v3-1309373-1309932__var-3	41	+	[ID=PF3D7_0532300;description=Plasmodium exported protein (PHISTb), unknown function;]
Pf3D7_05_v3	1310530	1310578	Pf3D7_05_v3-1310350-1310913__var-0	48	+	NA
Pf3D7_05_v3	1310677	1310706	Pf3D7_05_v3-1310350-1310913__var-1	29	+	NA
Pf3D7_05_v3	1310756	1310785	Pf3D7_05_v3-1310350-1310913__var-2	29	+	NA
Pf3D7_05_v3	1311005	1311034	Pf3D7_05_v3-1310967-1311097__var-0	29	+	NA
Pf3D7_05_v3	1311165	1311188	Pf3D7_05_v3-1311165-1311434__var-0	23	+	NA
Pf3D7_05_v3	1311192	1311223	Pf3D7_05_v3-1311165-1311434__var-1	31	+	NA
Pf3D7_05_v3	1311249	1311284	Pf3D7_05_v3-1311165-1311434__var-2	35	+	NA
Pf3D7_05_v3	1311293	1311324	Pf3D7_05_v3-1311165-1311434__var-3	31	+	NA
Pf3D7_05_v3	1311325	1311356	Pf3D7_05_v3-1311165-1311434__var-4	31	+	NA
Pf3D7_05_v3	1311402	1311433	Pf3D7_05_v3-1311165-1311434__var-5	31	+	NA
Pf3D7_05_v3	1312420	1312449	Pf3D7_05_v3-1312420-1312667__var-0	29	+	NA
Pf3D7_05_v3	1312538	1312567	Pf3D7_05_v3-1312420-1312667__var-1	29	+	[ID=PF3D7_0532400;description=lysine-rich membrane-associated PHISTb protein;]
Pf3D7_05_v3	1312858	1312887	Pf3D7_05_v3-1312769-1313828__var-0	29	+	[ID=PF3D7_0532400;description=lysine-rich membrane-associated PHISTb protein;]
Pf3D7_05_v3	1312901	1312930	Pf3D7_05_v3-1312769-1313828__var-1	29	+	[ID=PF3D7_0532400;description=lysine-rich membrane-associated PHISTb protein;]
Pf3D7_05_v3	1313155	1313184	Pf3D7_05_v3-1312769-1313828__var-2	29	+	[ID=PF3D7_0532400;description=lysine-rich membrane-associated PHISTb protein;]
Pf3D7_05_v3	1313280	1313309	Pf3D7_05_v3-1312769-1313828__var-3	29	+	[ID=PF3D7_0532400;description=lysine-rich membrane-associated PHISTb protein;]
Pf3D7_05_v3	1313320	1313349	Pf3D7_05_v3-1312769-1313828__var-4	29	+	[ID=PF3D7_0532400;description=lysine-rich membrane-associated PHISTb protein;]
Pf3D7_05_v3	1313524	1313553	Pf3D7_05_v3-1312769-1313828__var-5	29	+	[ID=PF3D7_0532400;description=lysine-rich membrane-associated PHISTb protein;]
Pf3D7_05_v3	1313540	1313569	Pf3D7_05_v3-1312769-1313828__var-6	29	+	[ID=PF3D7_0532400;description=lysine-rich membrane-associated PHISTb protein;]
Pf3D7_05_v3	1313626	1313655	Pf3D7_05_v3-1312769-1313828__var-7	29	+	[ID=PF3D7_0532400;description=lysine-rich membrane-associated PHISTb protein;]
Pf3D7_05_v3	1313785	1313814	Pf3D7_05_v3-1312769-1313828__var-8	29	+	[ID=PF3D7_0532400;description=lysine-rich membrane-associated PHISTb protein;]
Pf3D7_05_v3	1314196	1314270	Pf3D7_05_v3-1314133-1314270__var-0	74	+	NA
Pf3D7_05_v3	1314697	1314758	Pf3D7_05_v3-1314697-1314881__var-0	61	+	NA
Pf3D7_05_v3	1314804	1314837	Pf3D7_05_v3-1314697-1314881__var-1	33	+	NA
Pf3D7_05_v3	1314824	1314855	Pf3D7_05_v3-1314697-1314881__var-2	31	+	NA
Pf3D7_05_v3	1314841	1314881	Pf3D7_05_v3-1314697-1314881__var-3	40	+	NA
Pf3D7_05_v3	1314951	1314995	Pf3D7_05_v3-1314944-1315407__var-00	44	+	NA
Pf3D7_05_v3	1315025	1315054	Pf3D7_05_v3-1314944-1315407__var-01	29	+	NA
Pf3D7_05_v3	1315051	1315101	Pf3D7_05_v3-1314944-1315407__var-02	50	+	NA
Pf3D7_05_v3	1315091	1315120	Pf3D7_05_v3-1314944-1315407__var-03	29	+	NA
Pf3D7_05_v3	1315109	1315139	Pf3D7_05_v3-1314944-1315407__var-04	30	+	NA
Pf3D7_05_v3	1315151	1315195	Pf3D7_05_v3-1314944-1315407__var-05	44	+	NA
Pf3D7_05_v3	1315191	1315220	Pf3D7_05_v3-1314944-1315407__var-06	29	+	NA
Pf3D7_05_v3	1315252	1315281	Pf3D7_05_v3-1314944-1315407__var-07	29	+	NA
Pf3D7_05_v3	1315273	1315302	Pf3D7_05_v3-1314944-1315407__var-08	29	+	NA
Pf3D7_05_v3	1315301	1315330	Pf3D7_05_v3-1314944-1315407__var-09	29	+	NA
Pf3D7_05_v3	1315484	1315525	Pf3D7_05_v3-1315481-1315700__var-0	41	+	NA
Pf3D7_05_v3	1315649	1315700	Pf3D7_05_v3-1315481-1315700__var-1	51	+	NA
Pf3D7_05_v3	1315897	1315926	Pf3D7_05_v3-1315893-1316081__var-0	29	+	NA
Pf3D7_05_v3	1315962	1315991	Pf3D7_05_v3-1315893-1316081__var-1	29	+	NA
Pf3D7_05_v3	1316246	1316278	Pf3D7_05_v3-1316211-1316410__var-0	32	+	NA
Pf3D7_05_v3	1316337	1316366	Pf3D7_05_v3-1316211-1316410__var-1	29	+	[ID=PF3D7_0532500;description=Plasmodium exported protein, unknown function;]
Pf3D7_05_v3	1316470	1316508	Pf3D7_05_v3-1316470-1316787__var-0	38	+	[ID=PF3D7_0532500;description=Plasmodium exported protein, unknown function;]
Pf3D7_05_v3	1316510	1316539	Pf3D7_05_v3-1316470-1316787__var-1	29	+	[ID=PF3D7_0532500;description=Plasmodium exported protein, unknown function;]
Pf3D7_05_v3	1316550	1316579	Pf3D7_05_v3-1316470-1316787__var-2	29	+	[ID=PF3D7_0532500;description=Plasmodium exported protein, unknown function;]
Pf3D7_05_v3	1316614	1316653	Pf3D7_05_v3-1316470-1316787__var-3	39	+	[ID=PF3D7_0532500;description=Plasmodium exported protein, unknown function;]
Pf3D7_05_v3	1316650	1316685	Pf3D7_05_v3-1316470-1316787__var-4	35	+	[ID=PF3D7_0532500;description=Plasmodium exported protein, unknown function;]
Pf3D7_05_v3	1316704	1316743	Pf3D7_05_v3-1316470-1316787__var-5	39	+	[ID=PF3D7_0532500;description=Plasmodium exported protein, unknown function;]
Pf3D7_05_v3	1316747	1316776	Pf3D7_05_v3-1316470-1316787__var-6	29	+	[ID=PF3D7_0532500;description=Plasmodium exported protein, unknown function;]
Pf3D7_05_v3	1317309	1317360	Pf3D7_05_v3-1317216-1317360__var-0	51	+	NA
Pf3D7_05_v3	1317420	1317449	Pf3D7_05_v3-1317415-1317520__var-0	29	+	NA
Pf3D7_05_v3	1317473	1317503	Pf3D7_05_v3-1317415-1317520__var-1	30	+	NA
Pf3D7_05_v3	1317625	1317667	Pf3D7_05_v3-1317607-1318089__var-0	42	+	NA
Pf3D7_05_v3	1317656	1317685	Pf3D7_05_v3-1317607-1318089__var-1	29	+	NA
Pf3D7_05_v3	1317740	1317769	Pf3D7_05_v3-1317607-1318089__var-2	29	+	NA
Pf3D7_05_v3	1317801	1317845	Pf3D7_05_v3-1317607-1318089__var-3	44	+	NA
Pf3D7_05_v3	1317933	1317962	Pf3D7_05_v3-1317607-1318089__var-4	29	+	NA
Pf3D7_05_v3	1318000	1318042	Pf3D7_05_v3-1317607-1318089__var-5	42	+	NA
Pf3D7_05_v3	1318298	1318336	Pf3D7_05_v3-1318298-1319007__var-00	38	+	NA
Pf3D7_05_v3	1318330	1318359	Pf3D7_05_v3-1318298-1319007__var-01	29	+	NA
Pf3D7_05_v3	1318357	1318386	Pf3D7_05_v3-1318298-1319007__var-02	29	+	NA
Pf3D7_05_v3	1318384	1318413	Pf3D7_05_v3-1318298-1319007__var-03	29	+	NA
Pf3D7_05_v3	1318406	1318443	Pf3D7_05_v3-1318298-1319007__var-04	37	+	NA
Pf3D7_05_v3	1318455	1318499	Pf3D7_05_v3-1318298-1319007__var-05	44	+	NA
Pf3D7_05_v3	1318539	1318586	Pf3D7_05_v3-1318298-1319007__var-06	47	+	[ID=PF3D7_0532600;description=Plasmodium exported protein, unknown function;]
Pf3D7_05_v3	1318596	1318711	Pf3D7_05_v3-1318298-1319007__var-07	115	+	[ID=PF3D7_0532600;description=Plasmodium exported protein, unknown function;]
Pf3D7_05_v3	1318717	1318805	Pf3D7_05_v3-1318298-1319007__var-08	88	+	[ID=PF3D7_0532600;description=Plasmodium exported protein, unknown function;]
Pf3D7_05_v3	1318800	1318867	Pf3D7_05_v3-1318298-1319007__var-09	67	+	[ID=PF3D7_0532600;description=Plasmodium exported protein, unknown function;]
Pf3D7_05_v3	1318860	1318889	Pf3D7_05_v3-1318298-1319007__var-10	29	+	[ID=PF3D7_0532600;description=Plasmodium exported protein, unknown function;]
Pf3D7_05_v3	1318889	1318950	Pf3D7_05_v3-1318298-1319007__var-11	61	+	[ID=PF3D7_0532600;description=Plasmodium exported protein, unknown function;]
Pf3D7_05_v3	1318937	1318969	Pf3D7_05_v3-1318298-1319007__var-12	32	+	[ID=PF3D7_0532600;description=Plasmodium exported protein, unknown function;]
Pf3D7_05_v3	1318965	1318994	Pf3D7_05_v3-1318298-1319007__var-13	29	+	[ID=PF3D7_0532600;description=Plasmodium exported protein, unknown function;]
Pf3D7_05_v3	1318985	1319007	Pf3D7_05_v3-1318298-1319007__var-14	22	+	[ID=PF3D7_0532600;description=Plasmodium exported protein, unknown function;]
Pf3D7_05_v3	1319314	1319343	Pf3D7_05_v3-1319303-1319422__var-0	29	+	NA
Pf3D7_05_v3	1319357	1319386	Pf3D7_05_v3-1319303-1319422__var-1	29	+	NA
Pf3D7_05_v3	1319373	1319407	Pf3D7_05_v3-1319303-1319422__var-2	34	+	NA
Pf3D7_05_v3	1319647	1319707	Pf3D7_05_v3-1319619-1320153__var-0	60	+	NA
Pf3D7_05_v3	1319700	1319743	Pf3D7_05_v3-1319619-1320153__var-1	43	+	NA
Pf3D7_05_v3	1319766	1319831	Pf3D7_05_v3-1319619-1320153__var-2	65	+	NA
Pf3D7_05_v3	1319863	1319902	Pf3D7_05_v3-1319619-1320153__var-3	39	+	NA
Pf3D7_05_v3	1319884	1319923	Pf3D7_05_v3-1319619-1320153__var-4	39	+	NA
Pf3D7_05_v3	1319919	1319967	Pf3D7_05_v3-1319619-1320153__var-5	48	+	NA
Pf3D7_05_v3	1319951	1319990	Pf3D7_05_v3-1319619-1320153__var-6	39	+	NA
Pf3D7_05_v3	1320104	1320153	Pf3D7_05_v3-1319619-1320153__var-7	49	+	NA
Pf3D7_05_v3	1320233	1320273	Pf3D7_05_v3-1320208-1320444__var-0	40	+	NA
Pf3D7_05_v3	1320270	1320326	Pf3D7_05_v3-1320208-1320444__var-1	56	+	NA
Pf3D7_05_v3	1320397	1320426	Pf3D7_05_v3-1320208-1320444__var-2	29	+	NA
Pf3D7_05_v3	1320429	1320444	Pf3D7_05_v3-1320208-1320444__var-3	15	+	NA
Pf3D7_05_v3	1320615	1320644	Pf3D7_05_v3-1320543-1320802__var-0	29	+	NA
Pf3D7_05_v3	1320693	1320737	Pf3D7_05_v3-1320543-1320802__var-1	44	+	NA
Pf3D7_05_v3	1320741	1320781	Pf3D7_05_v3-1320543-1320802__var-2	40	+	NA
Pf3D7_05_v3	1320772	1320801	Pf3D7_05_v3-1320543-1320802__var-3	29	+	NA
Pf3D7_05_v3	1320885	1320918	Pf3D7_05_v3-1320864-1321265__var-0	33	+	NA
Pf3D7_05_v3	1320918	1320951	Pf3D7_05_v3-1320864-1321265__var-1	33	+	NA
Pf3D7_05_v3	1320959	1320992	Pf3D7_05_v3-1320864-1321265__var-2	33	+	NA
Pf3D7_05_v3	1320981	1321014	Pf3D7_05_v3-1320864-1321265__var-3	33	+	NA
Pf3D7_05_v3	1321042	1321090	Pf3D7_05_v3-1320864-1321265__var-4	48	+	NA
Pf3D7_05_v3	1321105	1321157	Pf3D7_05_v3-1320864-1321265__var-5	52	+	NA
Pf3D7_05_v3	1321169	1321203	Pf3D7_05_v3-1320864-1321265__var-6	34	+	NA
Pf3D7_05_v3	1321189	1321229	Pf3D7_05_v3-1320864-1321265__var-7	40	+	NA
Pf3D7_05_v3	1321568	1321687	Pf3D7_05_v3-1321568-1321687__subseq-0	119	+	NA
Pf3D7_05_v3	1321991	1322016	Pf3D7_05_v3-1321991-1322691__var-00	25	+	NA
Pf3D7_05_v3	1322016	1322073	Pf3D7_05_v3-1321991-1322691__var-01	57	+	NA
Pf3D7_05_v3	1322065	1322094	Pf3D7_05_v3-1321991-1322691__var-02	29	+	NA
Pf3D7_05_v3	1322083	1322112	Pf3D7_05_v3-1321991-1322691__var-03	29	+	NA
Pf3D7_05_v3	1322105	1322134	Pf3D7_05_v3-1321991-1322691__var-04	29	+	NA
Pf3D7_05_v3	1322121	1322173	Pf3D7_05_v3-1321991-1322691__var-05	52	+	NA
Pf3D7_05_v3	1322205	1322237	Pf3D7_05_v3-1321991-1322691__var-06	32	+	NA
Pf3D7_05_v3	1322279	1322308	Pf3D7_05_v3-1321991-1322691__var-07	29	+	NA
Pf3D7_05_v3	1322299	1322328	Pf3D7_05_v3-1321991-1322691__var-08	29	+	NA
Pf3D7_05_v3	1322363	1322392	Pf3D7_05_v3-1321991-1322691__var-09	29	+	NA
Pf3D7_05_v3	1322392	1322421	Pf3D7_05_v3-1321991-1322691__var-10	29	+	[ID=PF3D7_0532700;description=erythrocyte membrane protein 1 (PfEMP1), pseudogene;]
Pf3D7_05_v3	1322414	1322464	Pf3D7_05_v3-1321991-1322691__var-11	50	+	[ID=PF3D7_0532700;description=erythrocyte membrane protein 1 (PfEMP1), pseudogene;]
Pf3D7_05_v3	1322459	1322488	Pf3D7_05_v3-1321991-1322691__var-12	29	+	[ID=PF3D7_0532700;description=erythrocyte membrane protein 1 (PfEMP1), pseudogene;]
Pf3D7_05_v3	1322503	1322536	Pf3D7_05_v3-1321991-1322691__var-13	33	+	[ID=PF3D7_0532700;description=erythrocyte membrane protein 1 (PfEMP1), pseudogene;]
Pf3D7_05_v3	1322526	1322570	Pf3D7_05_v3-1321991-1322691__var-14	44	+	[ID=PF3D7_0532700;description=erythrocyte membrane protein 1 (PfEMP1), pseudogene;]
Pf3D7_05_v3	1322645	1322674	Pf3D7_05_v3-1321991-1322691__var-15	29	+	[ID=PF3D7_0532700;description=erythrocyte membrane protein 1 (PfEMP1), pseudogene;]
Pf3D7_05_v3	1322991	1323040	Pf3D7_05_v3-1322991-1323234__var-0	49	+	[ID=PF3D7_0532700;description=erythrocyte membrane protein 1 (PfEMP1), pseudogene;]
Pf3D7_05_v3	1323054	1323118	Pf3D7_05_v3-1322991-1323234__var-1	64	+	[ID=PF3D7_0532700;description=erythrocyte membrane protein 1 (PfEMP1), pseudogene;]
Pf3D7_05_v3	1323109	1323201	Pf3D7_05_v3-1322991-1323234__var-2	92	+	[ID=PF3D7_0532700;description=erythrocyte membrane protein 1 (PfEMP1), pseudogene;]
Pf3D7_05_v3	1323194	1323234	Pf3D7_05_v3-1322991-1323234__var-3	40	+	[ID=PF3D7_0532700;description=erythrocyte membrane protein 1 (PfEMP1), pseudogene;]
Pf3D7_05_v3	1341726	1341761	Pf3D7_05_v3-1341726-1342276__var-0	35	+	[ID=PF3D7_0533100;description=erythrocyte membrane protein 1 (PfEMP1), pseudogene;]
Pf3D7_05_v3	1341747	1341824	Pf3D7_05_v3-1341726-1342276__var-1	77	+	[ID=PF3D7_0533100;description=erythrocyte membrane protein 1 (PfEMP1), pseudogene;]
Pf3D7_05_v3	1341809	1341875	Pf3D7_05_v3-1341726-1342276__var-2	66	+	[ID=PF3D7_0533100;description=erythrocyte membrane protein 1 (PfEMP1), pseudogene;]
Pf3D7_05_v3	1341860	1341898	Pf3D7_05_v3-1341726-1342276__var-3	38	+	[ID=PF3D7_0533100;description=erythrocyte membrane protein 1 (PfEMP1), pseudogene;]
Pf3D7_05_v3	1341886	1341961	Pf3D7_05_v3-1341726-1342276__var-4	75	+	[ID=PF3D7_0533100;description=erythrocyte membrane protein 1 (PfEMP1), pseudogene;]
Pf3D7_05_v3	1341945	1341990	Pf3D7_05_v3-1341726-1342276__var-5	45	+	[ID=PF3D7_0533100;description=erythrocyte membrane protein 1 (PfEMP1), pseudogene;]
Pf3D7_05_v3	1341975	1342022	Pf3D7_05_v3-1341726-1342276__var-6	47	+	[ID=PF3D7_0533100;description=erythrocyte membrane protein 1 (PfEMP1), pseudogene;]
Pf3D7_05_v3	1342013	1342276	Pf3D7_05_v3-1341726-1342276__var-7	263	+	[ID=PF3D7_0533100;description=erythrocyte membrane protein 1 (PfEMP1), pseudogene;]
Pf3D7_07_v3	1035133	1035206	Pf3D7_07_v3-1035006-1035206__var-0	73	+	[ID=PF3D7_0724700;description=conserved Plasmodium protein, unknown function;]
Pf3D7_07_v3	1035786	1035828	Pf3D7_07_v3-1035784-1036684__var-0	42	+	[ID=PF3D7_0724700;description=conserved Plasmodium protein, unknown function;]
Pf3D7_07_v3	1035824	1035853	Pf3D7_07_v3-1035784-1036684__var-1	29	+	[ID=PF3D7_0724700;description=conserved Plasmodium protein, unknown function;]
Pf3D7_07_v3	1036118	1036147	Pf3D7_07_v3-1035784-1036684__var-2	29	+	[ID=PF3D7_0724700;description=conserved Plasmodium protein, unknown function;]
Pf3D7_07_v3	1036188	1036217	Pf3D7_07_v3-1035784-1036684__var-3	29	+	[ID=PF3D7_0724700;description=conserved Plasmodium protein, unknown function;]
Pf3D7_07_v3	1036211	1036240	Pf3D7_07_v3-1035784-1036684__var-4	29	+	[ID=PF3D7_0724700;description=conserved Plasmodium protein, unknown function;]
Pf3D7_07_v3	1036283	1036312	Pf3D7_07_v3-1035784-1036684__var-5	29	+	[ID=PF3D7_0724700;description=conserved Plasmodium protein, unknown function;]
Pf3D7_07_v3	1036310	1036339	Pf3D7_07_v3-1035784-1036684__var-6	29	+	[ID=PF3D7_0724700;description=conserved Plasmodium protein, unknown function;]
Pf3D7_07_v3	1036621	1036650	Pf3D7_07_v3-1035784-1036684__var-7	29	+	[ID=PF3D7_0724700;description=conserved Plasmodium protein, unknown function;]
Pf3D7_07_v3	1036864	1036893	Pf3D7_07_v3-1036769-1037319__var-0	29	+	[ID=PF3D7_0724700;description=conserved Plasmodium protein, unknown function;]
Pf3D7_07_v3	1036884	1036913	Pf3D7_07_v3-1036769-1037319__var-1	29	+	[ID=PF3D7_0724700;description=conserved Plasmodium protein, unknown function;]
Pf3D7_07_v3	1036919	1036948	Pf3D7_07_v3-1036769-1037319__var-2	29	+	[ID=PF3D7_0724700;description=conserved Plasmodium protein, unknown function;]
Pf3D7_07_v3	1037709	1037728	Pf3D7_07_v3-1037428-1037728__var-0	19	+	[ID=PF3D7_0724700;description=conserved Plasmodium protein, unknown function;]
Pf3D7_07_v3	1037969	1037998	Pf3D7_07_v3-1037797-1038747__var-0	29	+	[ID=PF3D7_0724700;description=conserved Plasmodium protein, unknown function;]
Pf3D7_07_v3	1038206	1038241	Pf3D7_07_v3-1037797-1038747__var-1	35	+	[ID=PF3D7_0724700;description=conserved Plasmodium protein, unknown function;]
Pf3D7_07_v3	1038454	1038483	Pf3D7_07_v3-1037797-1038747__var-2	29	+	[ID=PF3D7_0724700;description=conserved Plasmodium protein, unknown function;]
Pf3D7_07_v3	1038566	1038595	Pf3D7_07_v3-1037797-1038747__var-3	29	+	[ID=PF3D7_0724700;description=conserved Plasmodium protein, unknown function;]
Pf3D7_07_v3	1038703	1038732	Pf3D7_07_v3-1037797-1038747__var-4	29	+	[ID=PF3D7_0724700;description=conserved Plasmodium protein, unknown function;]
Pf3D7_07_v3	1038719	1038747	Pf3D7_07_v3-1037797-1038747__var-5	28	+	[ID=PF3D7_0724700;description=conserved Plasmodium protein, unknown function;]
Pf3D7_07_v3	1038955	1038984	Pf3D7_07_v3-1038889-1039089__var-0	29	+	[ID=PF3D7_0724700;description=conserved Plasmodium protein, unknown function;]
Pf3D7_07_v3	1039460	1039489	Pf3D7_07_v3-1039374-1040024__var-0	29	+	[ID=PF3D7_0724700;description=conserved Plasmodium protein, unknown function;]
Pf3D7_07_v3	1040208	1040237	Pf3D7_07_v3-1040151-1040451__var-0	29	+	[ID=PF3D7_0724700;description=conserved Plasmodium protein, unknown function;]
Pf3D7_07_v3	1040268	1040297	Pf3D7_07_v3-1040151-1040451__var-1	29	+	[ID=PF3D7_0724700;description=conserved Plasmodium protein, unknown function;]
Pf3D7_07_v3	1040300	1040329	Pf3D7_07_v3-1040151-1040451__var-2	29	+	[ID=PF3D7_0724700;description=conserved Plasmodium protein, unknown function;]
Pf3D7_07_v3	1040379	1040408	Pf3D7_07_v3-1040151-1040451__var-3	29	+	[ID=PF3D7_0724700;description=conserved Plasmodium protein, unknown function;]
Pf3D7_07_v3	1040397	1040426	Pf3D7_07_v3-1040151-1040451__var-4	29	+	[ID=PF3D7_0724700;description=conserved Plasmodium protein, unknown function;]
Pf3D7_07_v3	1041054	1041083	Pf3D7_07_v3-1040873-1041723__var-0	29	+	[ID=PF3D7_0724700;description=conserved Plasmodium protein, unknown function;]
Pf3D7_07_v3	1041128	1041157	Pf3D7_07_v3-1040873-1041723__var-1	29	+	[ID=PF3D7_0724700;description=conserved Plasmodium protein, unknown function;]
Pf3D7_07_v3	1042220	1042249	Pf3D7_07_v3-1042184-1042884__var-0	29	+	[ID=PF3D7_0724700;description=conserved Plasmodium protein, unknown function;]
Pf3D7_07_v3	1042286	1042315	Pf3D7_07_v3-1042184-1042884__var-1	29	+	[ID=PF3D7_0724700;description=conserved Plasmodium protein, unknown function;]
Pf3D7_07_v3	1042320	1042349	Pf3D7_07_v3-1042184-1042884__var-2	29	+	[ID=PF3D7_0724700;description=conserved Plasmodium protein, unknown function;]
Pf3D7_07_v3	1042610	1042639	Pf3D7_07_v3-1042184-1042884__var-3	29	+	[ID=PF3D7_0724700;description=conserved Plasmodium protein, unknown function;]
Pf3D7_07_v3	1043094	1043161	Pf3D7_07_v3-1043094-1043644__var-0	67	+	[ID=PF3D7_0724700;description=conserved Plasmodium protein, unknown function;]
Pf3D7_07_v3	1043472	1043539	Pf3D7_07_v3-1043094-1043644__var-1	67	+	[ID=PF3D7_0724700;description=conserved Plasmodium protein, unknown function;]
Pf3D7_07_v3	1044037	1044066	Pf3D7_07_v3-1043721-1044221__var-0	29	+	[ID=PF3D7_0724700;description=conserved Plasmodium protein, unknown function;]
Pf3D7_07_v3	1044134	1044163	Pf3D7_07_v3-1043721-1044221__var-1	29	+	[ID=PF3D7_0724700;description=conserved Plasmodium protein, unknown function;]
Pf3D7_07_v3	1044798	1044827	Pf3D7_07_v3-1044676-1045426__var-0	29	+	[ID=PF3D7_0724700;description=conserved Plasmodium protein, unknown function;]
Pf3D7_07_v3	1045191	1045220	Pf3D7_07_v3-1044676-1045426__var-1	29	+	[ID=PF3D7_0724700;description=conserved Plasmodium protein, unknown function;]
Pf3D7_07_v3	1045348	1045378	Pf3D7_07_v3-1044676-1045426__var-2	30	+	[ID=PF3D7_0724700;description=conserved Plasmodium protein, unknown function;]
Pf3D7_07_v3	1045890	1045919	Pf3D7_07_v3-1045574-1046074__var-0	29	+	[ID=PF3D7_0724700;description=conserved Plasmodium protein, unknown function;]
Pf3D7_07_v3	1045965	1045994	Pf3D7_07_v3-1045574-1046074__var-1	29	+	[ID=PF3D7_0724700;description=conserved Plasmodium protein, unknown function;]
Pf3D7_07_v3	1047866	1048116	Pf3D7_07_v3-1047866-1048116__subseq-0	250	+	[ID=PF3D7_0724800;description=kelch domain-containing protein, putative;]
Pf3D7_07_v3	1048261	1048290	Pf3D7_07_v3-1048251-1049051__var-0	29	+	[ID=PF3D7_0724800;description=kelch domain-containing protein, putative;]
Pf3D7_07_v3	1048577	1048606	Pf3D7_07_v3-1048251-1049051__var-1	29	+	[ID=PF3D7_0724800;description=kelch domain-containing protein, putative;]
Pf3D7_07_v3	1048776	1048805	Pf3D7_07_v3-1048251-1049051__var-2	29	+	[ID=PF3D7_0724800;description=kelch domain-containing protein, putative;]
Pf3D7_07_v3	1048895	1048924	Pf3D7_07_v3-1048251-1049051__var-3	29	+	[ID=PF3D7_0724800;description=kelch domain-containing protein, putative;]
Pf3D7_07_v3	1048922	1048951	Pf3D7_07_v3-1048251-1049051__var-4	29	+	[ID=PF3D7_0724800;description=kelch domain-containing protein, putative;]
Pf3D7_07_v3	1049013	1049042	Pf3D7_07_v3-1048251-1049051__var-5	29	+	[ID=PF3D7_0724800;description=kelch domain-containing protein, putative;]
Pf3D7_07_v3	1049167	1049196	Pf3D7_07_v3-1049167-1049367__var-0	29	+	[ID=PF3D7_0724800;description=kelch domain-containing protein, putative;]
Pf3D7_07_v3	1049210	1049239	Pf3D7_07_v3-1049167-1049367__var-1	29	+	[ID=PF3D7_0724800;description=kelch domain-containing protein, putative;]
Pf3D7_07_v3	1050772	1050801	Pf3D7_07_v3-1050728-1050928__var-0	29	+	NA
Pf3D7_07_v3	1052592	1052621	Pf3D7_07_v3-1052468-1054018__var-0	29	+	[ID=PF3D7_0724900;description=kinesin-19, putative;]
Pf3D7_07_v3	1052702	1052731	Pf3D7_07_v3-1052468-1054018__var-1	29	+	[ID=PF3D7_0724900;description=kinesin-19, putative;]
Pf3D7_07_v3	1052736	1052765	Pf3D7_07_v3-1052468-1054018__var-2	29	+	[ID=PF3D7_0724900;description=kinesin-19, putative;]
Pf3D7_07_v3	1052812	1052841	Pf3D7_07_v3-1052468-1054018__var-3	29	+	[ID=PF3D7_0724900;description=kinesin-19, putative;]
Pf3D7_07_v3	1052894	1052928	Pf3D7_07_v3-1052468-1054018__var-4	34	+	[ID=PF3D7_0724900;description=kinesin-19, putative;]
Pf3D7_07_v3	1052928	1052957	Pf3D7_07_v3-1052468-1054018__var-5	29	+	[ID=PF3D7_0724900;description=kinesin-19, putative;]
Pf3D7_07_v3	1053139	1053168	Pf3D7_07_v3-1052468-1054018__var-6	29	+	[ID=PF3D7_0724900;description=kinesin-19, putative;]
Pf3D7_07_v3	1054753	1054800	Pf3D7_07_v3-1054120-1055420__var-0	47	+	[ID=PF3D7_0724900;description=kinesin-19, putative;]
Pf3D7_07_v3	1055056	1055115	Pf3D7_07_v3-1054120-1055420__var-1	59	+	[ID=PF3D7_0724900;description=kinesin-19, putative;]
Pf3D7_07_v3	1055137	1055184	Pf3D7_07_v3-1054120-1055420__var-2	47	+	[ID=PF3D7_0724900;description=kinesin-19, putative;]
Pf3D7_07_v3	1055184	1055250	Pf3D7_07_v3-1054120-1055420__var-3	66	+	[ID=PF3D7_0724900;description=kinesin-19, putative;]
Pf3D7_07_v3	1055288	1055335	Pf3D7_07_v3-1054120-1055420__var-4	47	+	[ID=PF3D7_0724900;description=kinesin-19, putative;]
Pf3D7_07_v3	1055319	1055366	Pf3D7_07_v3-1054120-1055420__var-5	47	+	[ID=PF3D7_0724900;description=kinesin-19, putative;]
Pf3D7_07_v3	1055377	1055420	Pf3D7_07_v3-1054120-1055420__var-6	43	+	[ID=PF3D7_0724900;description=kinesin-19, putative;]
Pf3D7_07_v3	1055634	1055665	Pf3D7_07_v3-1055610-1057010__var-00	31	+	[ID=PF3D7_0724900;description=kinesin-19, putative;]
Pf3D7_07_v3	1055693	1055724	Pf3D7_07_v3-1055610-1057010__var-01	31	+	[ID=PF3D7_0724900;description=kinesin-19, putative;]
Pf3D7_07_v3	1055784	1055836	Pf3D7_07_v3-1055610-1057010__var-02	52	+	[ID=PF3D7_0724900;description=kinesin-19, putative;]
Pf3D7_07_v3	1055842	1055873	Pf3D7_07_v3-1055610-1057010__var-03	31	+	[ID=PF3D7_0724900;description=kinesin-19, putative;]
Pf3D7_07_v3	1055985	1056016	Pf3D7_07_v3-1055610-1057010__var-04	31	+	[ID=PF3D7_0724900;description=kinesin-19, putative;]
Pf3D7_07_v3	1056032	1056063	Pf3D7_07_v3-1055610-1057010__var-05	31	+	[ID=PF3D7_0724900;description=kinesin-19, putative;]
Pf3D7_07_v3	1056153	1056184	Pf3D7_07_v3-1055610-1057010__var-06	31	+	[ID=PF3D7_0724900;description=kinesin-19, putative;]
Pf3D7_07_v3	1056225	1056256	Pf3D7_07_v3-1055610-1057010__var-07	31	+	[ID=PF3D7_0724900;description=kinesin-19, putative;]
Pf3D7_07_v3	1056400	1056431	Pf3D7_07_v3-1055610-1057010__var-08	31	+	[ID=PF3D7_0724900;description=kinesin-19, putative;]
Pf3D7_07_v3	1056444	1056475	Pf3D7_07_v3-1055610-1057010__var-09	31	+	[ID=PF3D7_0724900;description=kinesin-19, putative;]
Pf3D7_07_v3	1056785	1056823	Pf3D7_07_v3-1055610-1057010__var-10	38	+	[ID=PF3D7_0724900;description=kinesin-19, putative;]
Pf3D7_07_v3	1056838	1056869	Pf3D7_07_v3-1055610-1057010__var-11	31	+	[ID=PF3D7_0724900;description=kinesin-19, putative;]
Pf3D7_07_v3	1057592	1057621	Pf3D7_07_v3-1057411-1057761__var-0	29	+	[ID=PF3D7_0724900;description=kinesin-19, putative;]
Pf3D7_07_v3	1057714	1057743	Pf3D7_07_v3-1057411-1057761__var-1	29	+	[ID=PF3D7_0724900;description=kinesin-19, putative;]
Pf3D7_07_v3	1057811	1057838	Pf3D7_07_v3-1057811-1058211__var-0	27	+	[ID=PF3D7_0724900;description=kinesin-19, putative;]
Pf3D7_07_v3	1057939	1057968	Pf3D7_07_v3-1057811-1058211__var-1	29	+	[ID=PF3D7_0724900;description=kinesin-19, putative;]
Pf3D7_07_v3	1058092	1058121	Pf3D7_07_v3-1057811-1058211__var-2	29	+	[ID=PF3D7_0724900;description=kinesin-19, putative;]
Pf3D7_07_v3	1058137	1058166	Pf3D7_07_v3-1057811-1058211__var-3	29	+	[ID=PF3D7_0724900;description=kinesin-19, putative;]
Pf3D7_07_v3	1058962	1058991	Pf3D7_07_v3-1058899-1059849__var-0	29	+	[ID=PF3D7_0725000;description=exonuclease I, putative;]
Pf3D7_07_v3	1059008	1059037	Pf3D7_07_v3-1058899-1059849__var-1	29	+	[ID=PF3D7_0725000;description=exonuclease I, putative;]
Pf3D7_07_v3	1059379	1059408	Pf3D7_07_v3-1058899-1059849__var-2	29	+	[ID=PF3D7_0725000;description=exonuclease I, putative;]
Pf3D7_07_v3	1059454	1059483	Pf3D7_07_v3-1058899-1059849__var-3	29	+	[ID=PF3D7_0725000;description=exonuclease I, putative;]
Pf3D7_07_v3	1059562	1059598	Pf3D7_07_v3-1058899-1059849__var-4	36	+	[ID=PF3D7_0725000;description=exonuclease I, putative;]
Pf3D7_07_v3	1059595	1059624	Pf3D7_07_v3-1058899-1059849__var-5	29	+	[ID=PF3D7_0725000;description=exonuclease I, putative;]
Pf3D7_07_v3	1059655	1059684	Pf3D7_07_v3-1058899-1059849__var-6	29	+	[ID=PF3D7_0725000;description=exonuclease I, putative;]
Pf3D7_07_v3	1059831	1059849	Pf3D7_07_v3-1058899-1059849__var-7	18	+	[ID=PF3D7_0725000;description=exonuclease I, putative;]
Pf3D7_07_v3	1060402	1060431	Pf3D7_07_v3-1060351-1061301__var-0	29	+	[ID=PF3D7_0725000;description=exonuclease I, putative;]
Pf3D7_07_v3	1060643	1060672	Pf3D7_07_v3-1060351-1061301__var-1	29	+	[ID=PF3D7_0725000;description=exonuclease I, putative;]
Pf3D7_07_v3	1060707	1060736	Pf3D7_07_v3-1060351-1061301__var-2	29	+	[ID=PF3D7_0725000;description=exonuclease I, putative;]
Pf3D7_07_v3	1060971	1061000	Pf3D7_07_v3-1060351-1061301__var-3	29	+	[ID=PF3D7_0725000;description=exonuclease I, putative;]
Pf3D7_07_v3	1061543	1061572	Pf3D7_07_v3-1061536-1062036__var-0	29	+	[ID=PF3D7_0725000;description=exonuclease I, putative;]
Pf3D7_07_v3	1061687	1061716	Pf3D7_07_v3-1061536-1062036__var-1	29	+	[ID=PF3D7_0725000;description=exonuclease I, putative;]
Pf3D7_07_v3	1061728	1061757	Pf3D7_07_v3-1061536-1062036__var-2	29	+	[ID=PF3D7_0725000;description=exonuclease I, putative;]
Pf3D7_07_v3	1062247	1062276	Pf3D7_07_v3-1062147-1062947__var-0	29	+	[ID=PF3D7_0725000;description=exonuclease I, putative;]
Pf3D7_07_v3	1062555	1062584	Pf3D7_07_v3-1062147-1062947__var-1	29	+	[ID=PF3D7_0725000;description=exonuclease I, putative;]
Pf3D7_07_v3	1062854	1062883	Pf3D7_07_v3-1062147-1062947__var-2	29	+	[ID=PF3D7_0725000;description=exonuclease I, putative;]
Pf3D7_07_v3	1063484	1063561	Pf3D7_07_v3-1063446-1063646__var-0	77	+	NA
Pf3D7_07_v3	1063574	1063646	Pf3D7_07_v3-1063446-1063646__var-1	72	+	NA
Pf3D7_07_v3	1065226	1065255	Pf3D7_07_v3-1065226-1065926__var-0	29	+	[ID=PF3D7_0725100;description=conserved Plasmodium membrane protein, unknown function;]
Pf3D7_07_v3	1065363	1065392	Pf3D7_07_v3-1065226-1065926__var-1	29	+	[ID=PF3D7_0725100;description=conserved Plasmodium membrane protein, unknown function;]
Pf3D7_07_v3	1065486	1065515	Pf3D7_07_v3-1065226-1065926__var-2	29	+	[ID=PF3D7_0725100;description=conserved Plasmodium membrane protein, unknown function;]
Pf3D7_07_v3	1065741	1065770	Pf3D7_07_v3-1065226-1065926__var-3	29	+	[ID=PF3D7_0725100;description=conserved Plasmodium membrane protein, unknown function;]
Pf3D7_07_v3	1065782	1065811	Pf3D7_07_v3-1065226-1065926__var-4	29	+	[ID=PF3D7_0725100;description=conserved Plasmodium membrane protein, unknown function;]
Pf3D7_07_v3	1065872	1065902	Pf3D7_07_v3-1065226-1065926__var-5	30	+	[ID=PF3D7_0725100;description=conserved Plasmodium membrane protein, unknown function;]
Pf3D7_07_v3	1065898	1065926	Pf3D7_07_v3-1065226-1065926__var-6	28	+	[ID=PF3D7_0725100;description=conserved Plasmodium membrane protein, unknown function;]
Pf3D7_07_v3	1066236	1066288	Pf3D7_07_v3-1066236-1067136__var-0	52	+	[ID=PF3D7_0725100;description=conserved Plasmodium membrane protein, unknown function;]
Pf3D7_07_v3	1066495	1066530	Pf3D7_07_v3-1066236-1067136__var-1	35	+	[ID=PF3D7_0725100;description=conserved Plasmodium membrane protein, unknown function;]
Pf3D7_07_v3	1066629	1066664	Pf3D7_07_v3-1066236-1067136__var-2	35	+	[ID=PF3D7_0725100;description=conserved Plasmodium membrane protein, unknown function;]
Pf3D7_07_v3	1066680	1066720	Pf3D7_07_v3-1066236-1067136__var-3	40	+	[ID=PF3D7_0725100;description=conserved Plasmodium membrane protein, unknown function;]
Pf3D7_07_v3	1066748	1066783	Pf3D7_07_v3-1066236-1067136__var-4	35	+	[ID=PF3D7_0725100;description=conserved Plasmodium membrane protein, unknown function;]
Pf3D7_07_v3	1066859	1066894	Pf3D7_07_v3-1066236-1067136__var-5	35	+	[ID=PF3D7_0725100;description=conserved Plasmodium membrane protein, unknown function;]
Pf3D7_07_v3	1066934	1066975	Pf3D7_07_v3-1066236-1067136__var-6	41	+	[ID=PF3D7_0725100;description=conserved Plasmodium membrane protein, unknown function;]
Pf3D7_07_v3	1067009	1067044	Pf3D7_07_v3-1066236-1067136__var-7	35	+	[ID=PF3D7_0725100;description=conserved Plasmodium membrane protein, unknown function;]
Pf3D7_07_v3	1067222	1067251	Pf3D7_07_v3-1067186-1067736__var-0	29	+	[ID=PF3D7_0725100;description=conserved Plasmodium membrane protein, unknown function;]
Pf3D7_07_v3	1067248	1067277	Pf3D7_07_v3-1067186-1067736__var-1	29	+	[ID=PF3D7_0725100;description=conserved Plasmodium membrane protein, unknown function;]
Pf3D7_07_v3	1067337	1067366	Pf3D7_07_v3-1067186-1067736__var-2	29	+	[ID=PF3D7_0725100;description=conserved Plasmodium membrane protein, unknown function;]
Pf3D7_07_v3	1067451	1067480	Pf3D7_07_v3-1067186-1067736__var-3	29	+	[ID=PF3D7_0725100;description=conserved Plasmodium membrane protein, unknown function;]
Pf3D7_07_v3	1067714	1067736	Pf3D7_07_v3-1067186-1067736__var-4	22	+	[ID=PF3D7_0725100;description=conserved Plasmodium membrane protein, unknown function;]
Pf3D7_07_v3	1068152	1068181	Pf3D7_07_v3-1068050-1068600__var-0	29	+	[ID=PF3D7_0725100;description=conserved Plasmodium membrane protein, unknown function;]
Pf3D7_07_v3	1068333	1068362	Pf3D7_07_v3-1068050-1068600__var-1	29	+	[ID=PF3D7_0725100;description=conserved Plasmodium membrane protein, unknown function;]
Pf3D7_07_v3	1068947	1068976	Pf3D7_07_v3-1068696-1069796__var-0	29	+	[ID=PF3D7_0725100;description=conserved Plasmodium membrane protein, unknown function;]
Pf3D7_07_v3	1069027	1069056	Pf3D7_07_v3-1068696-1069796__var-1	29	+	[ID=PF3D7_0725100;description=conserved Plasmodium membrane protein, unknown function;]
Pf3D7_07_v3	1069069	1069098	Pf3D7_07_v3-1068696-1069796__var-2	29	+	[ID=PF3D7_0725100;description=conserved Plasmodium membrane protein, unknown function;]
Pf3D7_07_v3	1069253	1069282	Pf3D7_07_v3-1068696-1069796__var-3	29	+	[ID=PF3D7_0725100;description=conserved Plasmodium membrane protein, unknown function;]
Pf3D7_07_v3	1069379	1069502	Pf3D7_07_v3-1068696-1069796__var-4	123	+	[ID=PF3D7_0725100;description=conserved Plasmodium membrane protein, unknown function;]
Pf3D7_07_v3	1069494	1069523	Pf3D7_07_v3-1068696-1069796__var-5	29	+	[ID=PF3D7_0725100;description=conserved Plasmodium membrane protein, unknown function;]
Pf3D7_07_v3	1069548	1069590	Pf3D7_07_v3-1068696-1069796__var-6	42	+	[ID=PF3D7_0725100;description=conserved Plasmodium membrane protein, unknown function;]
Pf3D7_07_v3	1069715	1069744	Pf3D7_07_v3-1068696-1069796__var-7	29	+	[ID=PF3D7_0725100;description=conserved Plasmodium membrane protein, unknown function;]
Pf3D7_07_v3	1069771	1069796	Pf3D7_07_v3-1068696-1069796__var-8	25	+	[ID=PF3D7_0725100;description=conserved Plasmodium membrane protein, unknown function;]
Pf3D7_07_v3	1070257	1070301	Pf3D7_07_v3-1070001-1070301__var-0	44	+	NA
Pf3D7_07_v3	1071365	1071615	Pf3D7_07_v3-1071365-1071615__subseq-0	250	+	[ID=PF3D7_0725200;description=mago nashi protein homologue, putative;]
Pf3D7_07_v3	1072579	1072616	Pf3D7_07_v3-1072536-1074386__var-0	37	+	[ID=PF3D7_0725300;description=conserved protein, unknown function;]
Pf3D7_07_v3	1073033	1073070	Pf3D7_07_v3-1072536-1074386__var-1	37	+	[ID=PF3D7_0725300;description=conserved protein, unknown function;]
Pf3D7_07_v3	1073149	1073186	Pf3D7_07_v3-1072536-1074386__var-2	37	+	[ID=PF3D7_0725300;description=conserved protein, unknown function;]
Pf3D7_07_v3	1073169	1073206	Pf3D7_07_v3-1072536-1074386__var-3	37	+	[ID=PF3D7_0725300;description=conserved protein, unknown function;]
Pf3D7_07_v3	1073246	1073283	Pf3D7_07_v3-1072536-1074386__var-4	37	+	[ID=PF3D7_0725300;description=conserved protein, unknown function;]
Pf3D7_07_v3	1073280	1073317	Pf3D7_07_v3-1072536-1074386__var-5	37	+	[ID=PF3D7_0725300;description=conserved protein, unknown function;]
Pf3D7_07_v3	1073704	1073741	Pf3D7_07_v3-1072536-1074386__var-6	37	+	[ID=PF3D7_0725300;description=conserved protein, unknown function;]
Pf3D7_07_v3	1073882	1073919	Pf3D7_07_v3-1072536-1074386__var-7	37	+	[ID=PF3D7_0725300;description=conserved protein, unknown function;]
Pf3D7_07_v3	1073915	1073955	Pf3D7_07_v3-1072536-1074386__var-8	40	+	[ID=PF3D7_0725300;description=conserved protein, unknown function;]
Pf3D7_07_v3	1074849	1074886	Pf3D7_07_v3-1074845-1075095__var-0	37	+	NA
Pf3D7_07_v3	1074922	1074963	Pf3D7_07_v3-1074845-1075095__var-1	41	+	NA
Pf3D7_07_v3	1074952	1074981	Pf3D7_07_v3-1074845-1075095__var-2	29	+	NA
Pf3D7_07_v3	1075031	1075060	Pf3D7_07_v3-1074845-1075095__var-3	29	+	NA
Pf3D7_07_v3	1075298	1075335	Pf3D7_07_v3-1075262-1075512__var-0	37	+	NA
Pf3D7_07_v3	1075356	1075385	Pf3D7_07_v3-1075262-1075512__var-1	29	+	NA
Pf3D7_07_v3	1076541	1076583	Pf3D7_07_v3-1076396-1076596__var-0	42	+	NA
Pf3D7_07_v3	1078823	1079073	Pf3D7_07_v3-1078823-1079073__subseq-0	250	+	[ID=PF3D7_0725400;description=conserved Plasmodium protein, unknown function;]
Pf3D7_07_v3	1079348	1079377	Pf3D7_07_v3-1079197-1079447__var-0	29	+	[ID=PF3D7_0725400;description=conserved Plasmodium protein, unknown function;]
Pf3D7_07_v3	1079399	1079428	Pf3D7_07_v3-1079197-1079447__var-1	29	+	[ID=PF3D7_0725400;description=conserved Plasmodium protein, unknown function;]
Pf3D7_07_v3	1079985	1080058	Pf3D7_07_v3-1079858-1080058__var-0	73	+	[ID=PF3D7_0725400;description=conserved Plasmodium protein, unknown function;]
Pf3D7_07_v3	1082065	1082094	Pf3D7_07_v3-1082043-1082243__var-0	29	+	NA
Pf3D7_07_v3	1082116	1082145	Pf3D7_07_v3-1082043-1082243__var-1	29	+	NA
Pf3D7_07_v3	1082225	1082243	Pf3D7_07_v3-1082043-1082243__var-2	18	+	NA
Pf3D7_07_v3	1082878	1082912	Pf3D7_07_v3-1082878-1083228__var-0	34	+	NA
Pf3D7_07_v3	1082906	1082957	Pf3D7_07_v3-1082878-1083228__var-1	51	+	NA
Pf3D7_07_v3	1082997	1083052	Pf3D7_07_v3-1082878-1083228__var-2	55	+	NA
Pf3D7_07_v3	1083051	1083086	Pf3D7_07_v3-1082878-1083228__var-3	35	+	NA
Pf3D7_07_v3	1083084	1083113	Pf3D7_07_v3-1082878-1083228__var-4	29	+	NA
Pf3D7_07_v3	1083104	1083206	Pf3D7_07_v3-1082878-1083228__var-5	102	+	NA
Pf3D7_07_v3	1083195	1083226	Pf3D7_07_v3-1082878-1083228__var-6	31	+	NA
Pf3D7_07_v3	1083328	1083357	Pf3D7_05_v3-1289171-1289611-for__var-0	29	+	NA
Pf3D7_07_v3	1083356	1083407	Pf3D7_05_v3-1289171-1289611-for__var-1	51	+	NA
Pf3D7_07_v3	1083395	1083471	Pf3D7_05_v3-1289171-1289611-for__var-2	76	+	NA
Pf3D7_07_v3	1083459	1083502	Pf3D7_05_v3-1289171-1289611-for__var-3	43	+	NA
Pf3D7_07_v3	1083538	1083592	Pf3D7_05_v3-1289171-1289611-for__var-4	54	+	NA
Pf3D7_07_v3	1083585	1083619	Pf3D7_05_v3-1289171-1289611-for__var-5	34	+	NA
Pf3D7_07_v3	1083636	1083760	Pf3D7_05_v3-1289171-1289611-for__var-6	124	+	NA
Pf3D7_07_v3	1083878	1083907	Pf3D7_05_v3-1289681-1290191-for__var-0	29	+	[ID=PF3D7_0725600;description=18S ribosomal RNA;]
Pf3D7_07_v3	1083930	1083972	Pf3D7_05_v3-1289681-1290191-for__var-1	42	+	[ID=PF3D7_0725600;description=18S ribosomal RNA;]
Pf3D7_07_v3	1083962	1083991	Pf3D7_05_v3-1289681-1290191-for__var-2	29	+	[ID=PF3D7_0725600;description=18S ribosomal RNA;]
Pf3D7_07_v3	1084016	1084057	Pf3D7_05_v3-1289681-1290191-for__var-3	41	+	[ID=PF3D7_0725600;description=18S ribosomal RNA;]
Pf3D7_07_v3	1084088	1084117	Pf3D7_05_v3-1289681-1290191-for__var-4	29	+	[ID=PF3D7_0725600;description=18S ribosomal RNA;]
Pf3D7_07_v3	1084395	1084424	Pf3D7_05_v3-1290211-1290931-for__var-0	29	+	[ID=PF3D7_0725600;description=18S ribosomal RNA;]
Pf3D7_07_v3	1084413	1084450	Pf3D7_05_v3-1290211-1290931-for__var-1	37	+	[ID=PF3D7_0725600;description=18S ribosomal RNA;]
Pf3D7_07_v3	1084439	1084500	Pf3D7_05_v3-1290211-1290931-for__var-2	61	+	[ID=PF3D7_0725600;description=18S ribosomal RNA;]
Pf3D7_07_v3	1084490	1084555	Pf3D7_05_v3-1290211-1290931-for__var-3	65	+	[ID=PF3D7_0725600;description=18S ribosomal RNA;]
Pf3D7_07_v3	1084573	1084602	Pf3D7_05_v3-1290211-1290931-for__var-4	29	+	[ID=PF3D7_0725600;description=18S ribosomal RNA;]
Pf3D7_07_v3	1084650	1084679	Pf3D7_05_v3-1290211-1290931-for__var-5	29	+	[ID=PF3D7_0725600;description=18S ribosomal RNA;]
Pf3D7_07_v3	1084855	1084884	Pf3D7_05_v3-1290211-1290931-for__var-6	29	+	[ID=PF3D7_0725600;description=18S ribosomal RNA;]
Pf3D7_07_v3	1084891	1084920	Pf3D7_05_v3-1290211-1290931-for__var-7	29	+	[ID=PF3D7_0725600;description=18S ribosomal RNA;]
Pf3D7_07_v3	1085045	1085074	Pf3D7_05_v3-1290211-1290931-for__var-8	29	+	[ID=PF3D7_0725600;description=18S ribosomal RNA;]
Pf3D7_07_v3	1085218	1085315	Pf3D7_05_v3-1291061-1291206-for__var-0	97	+	[ID=PF3D7_0725600;description=18S ribosomal RNA;]
Pf3D7_07_v3	1085303	1085359	Pf3D7_05_v3-1291061-1291206-for__var-1	56	+	[ID=PF3D7_0725600;description=18S ribosomal RNA;]
Pf3D7_07_v3	1085546	1085575	Pf3D7_05_v3-1291211-1292591-for__var-00	29	+	[ID=PF3D7_0725600;description=18S ribosomal RNA;]
Pf3D7_07_v3	1085644	1085673	Pf3D7_05_v3-1291211-1292591-for__var-01	29	+	[ID=PF3D7_0725600;description=18S ribosomal RNA;]
Pf3D7_07_v3	1085745	1085784	Pf3D7_05_v3-1291211-1292591-for__var-02	39	+	[ID=PF3D7_0725600;description=18S ribosomal RNA;]
Pf3D7_07_v3	1085851	1085956	Pf3D7_05_v3-1291211-1292591-for__var-03	105	+	[ID=PF3D7_0725700;description=unspecified product;]
Pf3D7_07_v3	1085968	1086020	Pf3D7_05_v3-1291211-1292591-for__var-04	52	+	[ID=PF3D7_0725700;description=unspecified product;]
Pf3D7_07_v3	1086025	1086076	Pf3D7_05_v3-1291211-1292591-for__var-05	51	+	[ID=PF3D7_0725700;description=unspecified product;]
Pf3D7_07_v3	1086101	1086171	Pf3D7_05_v3-1291211-1292591-for__var-06	70	+	[ID=PF3D7_0725700;description=unspecified product;]
Pf3D7_07_v3	1086159	1086221	Pf3D7_05_v3-1291211-1292591-for__var-07	62	+	[ID=PF3D7_0725700;description=unspecified product;],[ID=PF3D7_0725800;description=5.8S ribosomal RNA;]
Pf3D7_07_v3	1086336	1086365	Pf3D7_05_v3-1291211-1292591-for__var-08	29	+	[ID=PF3D7_0725800;description=5.8S ribosomal RNA;]
Pf3D7_07_v3	1086427	1086524	Pf3D7_05_v3-1291211-1292591-for__var-09	97	+	[ID=PF3D7_0725900;description=unspecified product;]
Pf3D7_07_v3	1086531	1086569	Pf3D7_05_v3-1291211-1292591-for__var-10	38	+	[ID=PF3D7_0725900;description=unspecified product;]
Pf3D7_07_v3	1086698	1086727	Pf3D7_05_v3-1291211-1292591-for__var-11	29	+	[ID=PF3D7_0726000;description=28S ribosomal RNA;]
Pf3D7_07_v3	1087702	1087731	Pf3D7_05_v3-1293521-1293666-for__var-0	29	+	[ID=PF3D7_0726000;description=28S ribosomal RNA;]
Pf3D7_07_v3	1087746	1087788	Pf3D7_05_v3-1293521-1293666-for__var-1	42	+	[ID=PF3D7_0726000;description=28S ribosomal RNA;]
Pf3D7_07_v3	1087784	1087813	Pf3D7_05_v3-1293521-1293666-for__var-2	29	+	[ID=PF3D7_0726000;description=28S ribosomal RNA;]
Pf3D7_07_v3	1088004	1088046	Pf3D7_05_v3-1293841-1294541-for__var-0	42	+	[ID=PF3D7_0726000;description=28S ribosomal RNA;]
Pf3D7_07_v3	1088041	1088076	Pf3D7_05_v3-1293841-1294541-for__var-1	35	+	[ID=PF3D7_0726000;description=28S ribosomal RNA;]
Pf3D7_07_v3	1088266	1088303	Pf3D7_05_v3-1293841-1294541-for__var-2	37	+	[ID=PF3D7_0726000;description=28S ribosomal RNA;]
Pf3D7_07_v3	1088325	1088354	Pf3D7_05_v3-1293841-1294541-for__var-3	29	+	[ID=PF3D7_0726000;description=28S ribosomal RNA;]
Pf3D7_07_v3	1088381	1088410	Pf3D7_05_v3-1293841-1294541-for__var-4	29	+	[ID=PF3D7_0726000;description=28S ribosomal RNA;]
Pf3D7_07_v3	1088480	1088518	Pf3D7_05_v3-1293841-1294541-for__var-5	38	+	[ID=PF3D7_0726000;description=28S ribosomal RNA;]
Pf3D7_07_v3	1088505	1088535	Pf3D7_05_v3-1293841-1294541-for__var-6	30	+	[ID=PF3D7_0726000;description=28S ribosomal RNA;]
Pf3D7_07_v3	1088522	1088551	Pf3D7_05_v3-1293841-1294541-for__var-7	29	+	[ID=PF3D7_0726000;description=28S ribosomal RNA;]
Pf3D7_07_v3	1088596	1088658	Pf3D7_05_v3-1293841-1294541-for__var-8	62	+	[ID=PF3D7_0726000;description=28S ribosomal RNA;]
Pf3D7_07_v3	1088794	1088916	Pf3D7_05_v3-1294631-1294821-for__var-0	122	+	[ID=PF3D7_0726000;description=28S ribosomal RNA;]
Pf3D7_07_v3	1088903	1088950	Pf3D7_05_v3-1294631-1294821-for__var-1	47	+	[ID=PF3D7_0726000;description=28S ribosomal RNA;]
Pf3D7_07_v3	1089910	1089964	Pf3D7_05_v3-1295751-1295811-for__var-0	54	+	[ID=PF3D7_0726000;description=28S ribosomal RNA;]
Pf3D7_07_v3	1090070	1090127	Pf3D7_05_v3-1295841-1296225-for__var-0	57	+	[ID=PF3D7_0726000;description=28S ribosomal RNA;]
Pf3D7_07_v3	1090136	1090197	Pf3D7_05_v3-1295841-1296225-for__var-1	61	+	[ID=PF3D7_0726000;description=28S ribosomal RNA;]
Pf3D7_07_v3	1090185	1090244	Pf3D7_05_v3-1295841-1296225-for__var-2	59	+	[ID=PF3D7_0726000;description=28S ribosomal RNA;]
Pf3D7_07_v3	1090312	1090383	Pf3D7_05_v3-1295841-1296225-for__var-3	71	+	[ID=PF3D7_0726000;description=28S ribosomal RNA;]
Pf3D7_07_v3	1090983	1091030	Pf3D7_07_v3-1090983-1091483__var-0	47	+	NA
Pf3D7_07_v3	1091019	1091160	Pf3D7_07_v3-1090983-1091483__var-1	141	+	NA
Pf3D7_07_v3	1091168	1091271	Pf3D7_07_v3-1090983-1091483__var-2	103	+	NA
Pf3D7_07_v3	1091255	1091319	Pf3D7_07_v3-1090983-1091483__var-3	64	+	NA
Pf3D7_07_v3	1091325	1091376	Pf3D7_07_v3-1090983-1091483__var-4	51	+	NA
Pf3D7_07_v3	1091361	1091419	Pf3D7_07_v3-1090983-1091483__var-5	58	+	NA
Pf3D7_07_v3	1091414	1091476	Pf3D7_07_v3-1090983-1091483__var-6	62	+	NA
Pf3D7_07_v3	1091534	1091603	Pf3D7_07_v3-1091533-1091883__var-0	69	+	NA
Pf3D7_07_v3	1091608	1091645	Pf3D7_07_v3-1091533-1091883__var-1	37	+	NA
Pf3D7_07_v3	1091638	1091758	Pf3D7_07_v3-1091533-1091883__var-2	120	+	NA
Pf3D7_07_v3	1091834	1091863	Pf3D7_07_v3-1091533-1091883__var-3	29	+	NA
Pf3D7_07_v3	1092296	1092326	Pf3D7_07_v3-1092211-1092711__var-0	30	+	NA
Pf3D7_07_v3	1092321	1092350	Pf3D7_07_v3-1092211-1092711__var-1	29	+	NA
Pf3D7_07_v3	1092343	1092372	Pf3D7_07_v3-1092211-1092711__var-2	29	+	NA
Pf3D7_07_v3	1092398	1092427	Pf3D7_07_v3-1092211-1092711__var-3	29	+	NA
Pf3D7_07_v3	1092444	1092602	Pf3D7_07_v3-1092211-1092711__var-4	158	+	NA
Pf3D7_07_v3	1092658	1092691	Pf3D7_07_v3-1092211-1092711__var-5	33	+	NA
Pf3D7_07_v3	1092684	1092711	Pf3D7_07_v3-1092211-1092711__var-6	27	+	NA
Pf3D7_07_v3	1093571	1093600	Pf3D7_07_v3-1093570-1094220__var-0	29	+	[ID=PF3D7_0726100;description=Plasmodium exported protein, unknown function;]
Pf3D7_07_v3	1093592	1093629	Pf3D7_07_v3-1093570-1094220__var-1	37	+	[ID=PF3D7_0726100;description=Plasmodium exported protein, unknown function;]
Pf3D7_07_v3	1093639	1093668	Pf3D7_07_v3-1093570-1094220__var-2	29	+	[ID=PF3D7_0726100;description=Plasmodium exported protein, unknown function;]
Pf3D7_07_v3	1093672	1093737	Pf3D7_07_v3-1093570-1094220__var-3	65	+	[ID=PF3D7_0726100;description=Plasmodium exported protein, unknown function;]
Pf3D7_07_v3	1093968	1093997	Pf3D7_07_v3-1093570-1094220__var-4	29	+	[ID=PF3D7_0726100;description=Plasmodium exported protein, unknown function;]
Pf3D7_07_v3	1093987	1094016	Pf3D7_07_v3-1093570-1094220__var-5	29	+	[ID=PF3D7_0726100;description=Plasmodium exported protein, unknown function;]
Pf3D7_07_v3	1094085	1094114	Pf3D7_07_v3-1093570-1094220__var-6	29	+	[ID=PF3D7_0726100;description=Plasmodium exported protein, unknown function;]
Pf3D7_07_v3	1094176	1094205	Pf3D7_07_v3-1093570-1094220__var-7	29	+	[ID=PF3D7_0726100;description=Plasmodium exported protein, unknown function;]
Pf3D7_07_v3	1094359	1094536	Pf3D7_07_v3-1094326-1094976__var-0	177	+	[ID=PF3D7_0726100;description=Plasmodium exported protein, unknown function;]
Pf3D7_07_v3	1094651	1094766	Pf3D7_07_v3-1094326-1094976__var-1	115	+	[ID=PF3D7_0726100;description=Plasmodium exported protein, unknown function;]
Pf3D7_07_v3	1094735	1094814	Pf3D7_07_v3-1094326-1094976__var-2	79	+	[ID=PF3D7_0726100;description=Plasmodium exported protein, unknown function;]
Pf3D7_07_v3	1094785	1094864	Pf3D7_07_v3-1094326-1094976__var-3	79	+	[ID=PF3D7_0726100;description=Plasmodium exported protein, unknown function;]
Pf3D7_07_v3	1095314	1095343	Pf3D7_07_v3-1095258-1095758__var-0	29	+	[ID=PF3D7_0726100;description=Plasmodium exported protein, unknown function;]
Pf3D7_07_v3	1095399	1095428	Pf3D7_07_v3-1095258-1095758__var-1	29	+	[ID=PF3D7_0726100;description=Plasmodium exported protein, unknown function;]
Pf3D7_07_v3	1095607	1095636	Pf3D7_07_v3-1095258-1095758__var-2	29	+	[ID=PF3D7_0726100;description=Plasmodium exported protein, unknown function;]
Pf3D7_07_v3	1095928	1095957	Pf3D7_07_v3-1095898-1096098__var-0	29	+	[ID=PF3D7_0726100;description=Plasmodium exported protein, unknown function;]
Pf3D7_07_v3	1095971	1096000	Pf3D7_07_v3-1095898-1096098__var-1	29	+	[ID=PF3D7_0726100;description=Plasmodium exported protein, unknown function;]
Pf3D7_07_v3	1096024	1096098	Pf3D7_07_v3-1095898-1096098__var-2	74	+	[ID=PF3D7_0726100;description=Plasmodium exported protein, unknown function;]
Pf3D7_07_v3	1096518	1096547	Pf3D7_07_v3-1096407-1096607__var-0	29	+	NA
Pf3D7_07_v3	1098306	1098335	Pf3D7_07_v3-1098281-1098481__var-0	29	+	NA
Pf3D7_07_v3	1098417	1098449	Pf3D7_07_v3-1098281-1098481__var-1	32	+	NA
Pf3D7_07_v3	1098445	1098481	Pf3D7_07_v3-1098281-1098481__var-2	36	+	NA
Pf3D7_07_v3	1099067	1099162	Pf3D7_07_v3-1099067-1099417__var-0	95	+	NA
Pf3D7_07_v3	1099152	1099237	Pf3D7_07_v3-1099067-1099417__var-1	85	+	NA
Pf3D7_07_v3	1099229	1099312	Pf3D7_07_v3-1099067-1099417__var-2	83	+	NA
Pf3D7_07_v3	1099812	1099841	Pf3D7_07_v3-1099798-1099998__var-0	29	+	NA
Pf3D7_07_v3	1101500	1101529	Pf3D7_07_v3-1101276-1101576__var-0	29	+	[ID=PF3D7_0726200;description=serine/threonine protein kinase, FIKK family;]
Pf3D7_07_v3	1101865	1101894	Pf3D7_07_v3-1101849-1102299__var-0	29	+	[ID=PF3D7_0726200;description=serine/threonine protein kinase, FIKK family;]
Pf3D7_07_v3	1102022	1102110	Pf3D7_07_v3-1101849-1102299__var-1	88	+	[ID=PF3D7_0726200;description=serine/threonine protein kinase, FIKK family;]
Pf3D7_07_v3	1102184	1102213	Pf3D7_07_v3-1101849-1102299__var-2	29	+	[ID=PF3D7_0726200;description=serine/threonine protein kinase, FIKK family;]
Pf3D7_07_v3	1104336	1104379	Pf3D7_07_v3-1104164-1106064__var-0	43	+	[ID=PF3D7_0726300;description=DNA mismatch repair protein PMS1, putative;]
Pf3D7_07_v3	1104795	1104824	Pf3D7_07_v3-1104164-1106064__var-1	29	+	[ID=PF3D7_0726300;description=DNA mismatch repair protein PMS1, putative;]
Pf3D7_07_v3	1105181	1105210	Pf3D7_07_v3-1104164-1106064__var-2	29	+	[ID=PF3D7_0726300;description=DNA mismatch repair protein PMS1, putative;]
Pf3D7_07_v3	1105228	1105257	Pf3D7_07_v3-1104164-1106064__var-3	29	+	[ID=PF3D7_0726300;description=DNA mismatch repair protein PMS1, putative;]
Pf3D7_07_v3	1105511	1105540	Pf3D7_07_v3-1104164-1106064__var-4	29	+	[ID=PF3D7_0726300;description=DNA mismatch repair protein PMS1, putative;]
Pf3D7_07_v3	1105657	1105693	Pf3D7_07_v3-1104164-1106064__var-5	36	+	[ID=PF3D7_0726300;description=DNA mismatch repair protein PMS1, putative;]
Pf3D7_07_v3	1105779	1105821	Pf3D7_07_v3-1104164-1106064__var-6	42	+	[ID=PF3D7_0726300;description=DNA mismatch repair protein PMS1, putative;]
Pf3D7_07_v3	1105988	1106017	Pf3D7_07_v3-1104164-1106064__var-7	29	+	[ID=PF3D7_0726300;description=DNA mismatch repair protein PMS1, putative;]
Pf3D7_07_v3	1106713	1107163	Pf3D7_07_v3-1106713-1107163__subseq-0	450	+	[ID=PF3D7_0726300;description=DNA mismatch repair protein PMS1, putative;]
Pf3D7_07_v3	1107247	1107291	Pf3D7_07_v3-1107247-1107997__var-0	44	+	[ID=PF3D7_0726300;description=DNA mismatch repair protein PMS1, putative;]
Pf3D7_07_v3	1107485	1107528	Pf3D7_07_v3-1107247-1107997__var-1	43	+	[ID=PF3D7_0726300;description=DNA mismatch repair protein PMS1, putative;]
Pf3D7_07_v3	1107828	1107871	Pf3D7_07_v3-1107247-1107997__var-2	43	+	[ID=PF3D7_0726300;description=DNA mismatch repair protein PMS1, putative;]
Pf3D7_07_v3	1107855	1107917	Pf3D7_07_v3-1107247-1107997__var-3	62	+	[ID=PF3D7_0726300;description=DNA mismatch repair protein PMS1, putative;]
Pf3D7_07_v3	1107898	1107951	Pf3D7_07_v3-1107247-1107997__var-4	53	+	[ID=PF3D7_0726300;description=DNA mismatch repair protein PMS1, putative;]
Pf3D7_07_v3	1108195	1108224	Pf3D7_07_v3-1108070-1108370__var-0	29	+	[ID=PF3D7_0726300;description=DNA mismatch repair protein PMS1, putative;]
Pf3D7_07_v3	1109196	1109255	Pf3D7_07_v3-1109149-1110299__var-0	59	+	[ID=PF3D7_0726400;description=conserved Plasmodium membrane protein, unknown function;]
Pf3D7_07_v3	1109475	1109534	Pf3D7_07_v3-1109149-1110299__var-1	59	+	[ID=PF3D7_0726400;description=conserved Plasmodium membrane protein, unknown function;]
Pf3D7_07_v3	1109517	1109586	Pf3D7_07_v3-1109149-1110299__var-2	69	+	[ID=PF3D7_0726400;description=conserved Plasmodium membrane protein, unknown function;]
Pf3D7_07_v3	1109695	1109754	Pf3D7_07_v3-1109149-1110299__var-3	59	+	[ID=PF3D7_0726400;description=conserved Plasmodium membrane protein, unknown function;]
Pf3D7_07_v3	1109929	1109988	Pf3D7_07_v3-1109149-1110299__var-4	59	+	[ID=PF3D7_0726400;description=conserved Plasmodium membrane protein, unknown function;]
Pf3D7_07_v3	1110569	1110598	Pf3D7_07_v3-1110539-1110739__var-0	29	+	[ID=PF3D7_0726400;description=conserved Plasmodium membrane protein, unknown function;]
Pf3D7_07_v3	1110599	1110628	Pf3D7_07_v3-1110539-1110739__var-1	29	+	[ID=PF3D7_0726400;description=conserved Plasmodium membrane protein, unknown function;]
Pf3D7_07_v3	1110695	1110724	Pf3D7_07_v3-1110539-1110739__var-2	29	+	[ID=PF3D7_0726400;description=conserved Plasmodium membrane protein, unknown function;]
Pf3D7_07_v3	1110713	1110739	Pf3D7_07_v3-1110539-1110739__var-3	26	+	[ID=PF3D7_0726400;description=conserved Plasmodium membrane protein, unknown function;]
Pf3D7_07_v3	1110872	1110901	Pf3D7_07_v3-1110827-1111077__var-0	29	+	[ID=PF3D7_0726400;description=conserved Plasmodium membrane protein, unknown function;]
Pf3D7_07_v3	1111004	1111077	Pf3D7_07_v3-1110827-1111077__var-1	73	+	[ID=PF3D7_0726400;description=conserved Plasmodium membrane protein, unknown function;]
Pf3D7_07_v3	1111186	1111215	Pf3D7_07_v3-1111186-1111586__var-0	29	+	[ID=PF3D7_0726400;description=conserved Plasmodium membrane protein, unknown function;]
Pf3D7_07_v3	1111328	1111370	Pf3D7_07_v3-1111186-1111586__var-1	42	+	[ID=PF3D7_0726400;description=conserved Plasmodium membrane protein, unknown function;]
Pf3D7_07_v3	1111513	1111542	Pf3D7_07_v3-1111186-1111586__var-2	29	+	[ID=PF3D7_0726400;description=conserved Plasmodium membrane protein, unknown function;]
Pf3D7_07_v3	1111884	1111913	Pf3D7_07_v3-1111725-1112825__var-0	29	+	[ID=PF3D7_0726400;description=conserved Plasmodium membrane protein, unknown function;]
Pf3D7_07_v3	1112014	1112043	Pf3D7_07_v3-1111725-1112825__var-1	29	+	[ID=PF3D7_0726400;description=conserved Plasmodium membrane protein, unknown function;]
Pf3D7_07_v3	1112057	1112086	Pf3D7_07_v3-1111725-1112825__var-2	29	+	[ID=PF3D7_0726400;description=conserved Plasmodium membrane protein, unknown function;]
Pf3D7_07_v3	1112230	1112259	Pf3D7_07_v3-1111725-1112825__var-3	29	+	[ID=PF3D7_0726400;description=conserved Plasmodium membrane protein, unknown function;]
Pf3D7_07_v3	1112257	1112286	Pf3D7_07_v3-1111725-1112825__var-4	29	+	[ID=PF3D7_0726400;description=conserved Plasmodium membrane protein, unknown function;]
Pf3D7_07_v3	1112454	1112483	Pf3D7_07_v3-1111725-1112825__var-5	29	+	[ID=PF3D7_0726400;description=conserved Plasmodium membrane protein, unknown function;]
Pf3D7_07_v3	1112619	1112648	Pf3D7_07_v3-1111725-1112825__var-6	29	+	[ID=PF3D7_0726400;description=conserved Plasmodium membrane protein, unknown function;]
Pf3D7_07_v3	1112755	1112784	Pf3D7_07_v3-1111725-1112825__var-7	29	+	[ID=PF3D7_0726400;description=conserved Plasmodium membrane protein, unknown function;]
Pf3D7_07_v3	1112794	1112823	Pf3D7_07_v3-1111725-1112825__var-8	29	+	[ID=PF3D7_0726400;description=conserved Plasmodium membrane protein, unknown function;]
Pf3D7_07_v3	1113041	1113192	Pf3D7_07_v3-1112961-1115561__var-00	151	+	[ID=PF3D7_0726400;description=conserved Plasmodium membrane protein, unknown function;]
Pf3D7_07_v3	1113146	1113317	Pf3D7_07_v3-1112961-1115561__var-01	171	+	[ID=PF3D7_0726400;description=conserved Plasmodium membrane protein, unknown function;]
Pf3D7_07_v3	1113356	1113507	Pf3D7_07_v3-1112961-1115561__var-02	151	+	[ID=PF3D7_0726400;description=conserved Plasmodium membrane protein, unknown function;]
Pf3D7_07_v3	1113592	1113743	Pf3D7_07_v3-1112961-1115561__var-03	151	+	[ID=PF3D7_0726400;description=conserved Plasmodium membrane protein, unknown function;]
Pf3D7_07_v3	1113693	1113844	Pf3D7_07_v3-1112961-1115561__var-04	151	+	[ID=PF3D7_0726400;description=conserved Plasmodium membrane protein, unknown function;]
Pf3D7_07_v3	1114008	1114227	Pf3D7_07_v3-1112961-1115561__var-05	219	+	[ID=PF3D7_0726400;description=conserved Plasmodium membrane protein, unknown function;]
Pf3D7_07_v3	1114370	1114521	Pf3D7_07_v3-1112961-1115561__var-06	151	+	[ID=PF3D7_0726400;description=conserved Plasmodium membrane protein, unknown function;]
Pf3D7_07_v3	1114775	1114926	Pf3D7_07_v3-1112961-1115561__var-07	151	+	[ID=PF3D7_0726400;description=conserved Plasmodium membrane protein, unknown function;]
Pf3D7_07_v3	1115004	1115155	Pf3D7_07_v3-1112961-1115561__var-08	151	+	[ID=PF3D7_0726400;description=conserved Plasmodium membrane protein, unknown function;]
Pf3D7_07_v3	1115139	1115332	Pf3D7_07_v3-1112961-1115561__var-09	193	+	[ID=PF3D7_0726400;description=conserved Plasmodium membrane protein, unknown function;]
Pf3D7_07_v3	1115674	1115703	Pf3D7_07_v3-1115644-1116744__var-00	29	+	[ID=PF3D7_0726400;description=conserved Plasmodium membrane protein, unknown function;]
Pf3D7_07_v3	1115735	1115764	Pf3D7_07_v3-1115644-1116744__var-01	29	+	[ID=PF3D7_0726400;description=conserved Plasmodium membrane protein, unknown function;]
Pf3D7_07_v3	1115790	1115819	Pf3D7_07_v3-1115644-1116744__var-02	29	+	[ID=PF3D7_0726400;description=conserved Plasmodium membrane protein, unknown function;]
Pf3D7_07_v3	1115892	1115921	Pf3D7_07_v3-1115644-1116744__var-03	29	+	[ID=PF3D7_0726400;description=conserved Plasmodium membrane protein, unknown function;]
Pf3D7_07_v3	1115924	1115953	Pf3D7_07_v3-1115644-1116744__var-04	29	+	[ID=PF3D7_0726400;description=conserved Plasmodium membrane protein, unknown function;]
Pf3D7_07_v3	1115948	1115987	Pf3D7_07_v3-1115644-1116744__var-05	39	+	[ID=PF3D7_0726400;description=conserved Plasmodium membrane protein, unknown function;]
Pf3D7_07_v3	1115974	1116065	Pf3D7_07_v3-1115644-1116744__var-06	91	+	[ID=PF3D7_0726400;description=conserved Plasmodium membrane protein, unknown function;]
Pf3D7_07_v3	1116146	1116183	Pf3D7_07_v3-1115644-1116744__var-07	37	+	[ID=PF3D7_0726400;description=conserved Plasmodium membrane protein, unknown function;]
Pf3D7_07_v3	1116216	1116250	Pf3D7_07_v3-1115644-1116744__var-08	34	+	[ID=PF3D7_0726400;description=conserved Plasmodium membrane protein, unknown function;]
Pf3D7_07_v3	1116270	1116299	Pf3D7_07_v3-1115644-1116744__var-09	29	+	[ID=PF3D7_0726400;description=conserved Plasmodium membrane protein, unknown function;]
Pf3D7_07_v3	1116296	1116325	Pf3D7_07_v3-1115644-1116744__var-10	29	+	[ID=PF3D7_0726400;description=conserved Plasmodium membrane protein, unknown function;]
Pf3D7_07_v3	1116466	1116608	Pf3D7_07_v3-1115644-1116744__var-11	142	+	[ID=PF3D7_0726400;description=conserved Plasmodium membrane protein, unknown function;]
Pf3D7_07_v3	1116643	1116672	Pf3D7_07_v3-1115644-1116744__var-12	29	+	[ID=PF3D7_0726400;description=conserved Plasmodium membrane protein, unknown function;]
Pf3D7_07_v3	1116838	1116877	Pf3D7_07_v3-1116828-1118078__var-0	39	+	[ID=PF3D7_0726400;description=conserved Plasmodium membrane protein, unknown function;]
Pf3D7_07_v3	1116993	1117022	Pf3D7_07_v3-1116828-1118078__var-1	29	+	[ID=PF3D7_0726400;description=conserved Plasmodium membrane protein, unknown function;]
Pf3D7_07_v3	1117013	1117042	Pf3D7_07_v3-1116828-1118078__var-2	29	+	[ID=PF3D7_0726400;description=conserved Plasmodium membrane protein, unknown function;]
Pf3D7_07_v3	1117075	1117116	Pf3D7_07_v3-1116828-1118078__var-3	41	+	[ID=PF3D7_0726400;description=conserved Plasmodium membrane protein, unknown function;]
Pf3D7_07_v3	1117234	1117263	Pf3D7_07_v3-1116828-1118078__var-4	29	+	[ID=PF3D7_0726400;description=conserved Plasmodium membrane protein, unknown function;]
Pf3D7_07_v3	1117506	1117535	Pf3D7_07_v3-1116828-1118078__var-5	29	+	[ID=PF3D7_0726400;description=conserved Plasmodium membrane protein, unknown function;]
Pf3D7_07_v3	1117796	1117825	Pf3D7_07_v3-1116828-1118078__var-6	29	+	[ID=PF3D7_0726400;description=conserved Plasmodium membrane protein, unknown function;]
Pf3D7_07_v3	1118147	1118184	Pf3D7_07_v3-1118078-1118728__var-0	37	+	[ID=PF3D7_0726400;description=conserved Plasmodium membrane protein, unknown function;]
Pf3D7_07_v3	1118348	1118414	Pf3D7_07_v3-1118078-1118728__var-1	66	+	[ID=PF3D7_0726400;description=conserved Plasmodium membrane protein, unknown function;]
Pf3D7_07_v3	1118468	1118505	Pf3D7_07_v3-1118078-1118728__var-2	37	+	[ID=PF3D7_0726400;description=conserved Plasmodium membrane protein, unknown function;]
Pf3D7_07_v3	1119370	1119399	Pf3D7_07_v3-1118907-1119407__var-0	29	+	[ID=PF3D7_0726400;description=conserved Plasmodium membrane protein, unknown function;]
Pf3D7_07_v3	1119628	1119657	Pf3D7_07_v3-1119578-1120478__var-0	29	+	[ID=PF3D7_0726400;description=conserved Plasmodium membrane protein, unknown function;]
Pf3D7_07_v3	1119739	1119768	Pf3D7_07_v3-1119578-1120478__var-1	29	+	[ID=PF3D7_0726400;description=conserved Plasmodium membrane protein, unknown function;]
Pf3D7_07_v3	1119758	1119787	Pf3D7_07_v3-1119578-1120478__var-2	29	+	[ID=PF3D7_0726400;description=conserved Plasmodium membrane protein, unknown function;]
Pf3D7_07_v3	1120029	1120058	Pf3D7_07_v3-1119578-1120478__var-3	29	+	[ID=PF3D7_0726400;description=conserved Plasmodium membrane protein, unknown function;]
Pf3D7_07_v3	1120165	1120194	Pf3D7_07_v3-1119578-1120478__var-4	29	+	[ID=PF3D7_0726400;description=conserved Plasmodium membrane protein, unknown function;]
Pf3D7_07_v3	1120188	1120217	Pf3D7_07_v3-1119578-1120478__var-5	29	+	[ID=PF3D7_0726400;description=conserved Plasmodium membrane protein, unknown function;]
Pf3D7_07_v3	1120402	1120431	Pf3D7_07_v3-1119578-1120478__var-6	29	+	[ID=PF3D7_0726400;description=conserved Plasmodium membrane protein, unknown function;]
Pf3D7_07_v3	1120808	1120842	Pf3D7_07_v3-1120719-1121269__var-0	34	+	[ID=PF3D7_0726400;description=conserved Plasmodium membrane protein, unknown function;]
Pf3D7_07_v3	1120927	1120956	Pf3D7_07_v3-1120719-1121269__var-1	29	+	[ID=PF3D7_0726400;description=conserved Plasmodium membrane protein, unknown function;]
Pf3D7_07_v3	1120974	1121003	Pf3D7_07_v3-1120719-1121269__var-2	29	+	[ID=PF3D7_0726400;description=conserved Plasmodium membrane protein, unknown function;]
Pf3D7_07_v3	1121008	1121037	Pf3D7_07_v3-1120719-1121269__var-3	29	+	[ID=PF3D7_0726400;description=conserved Plasmodium membrane protein, unknown function;]
Pf3D7_07_v3	1121059	1121088	Pf3D7_07_v3-1120719-1121269__var-4	29	+	[ID=PF3D7_0726400;description=conserved Plasmodium membrane protein, unknown function;]
Pf3D7_07_v3	1121119	1121269	Pf3D7_07_v3-1120719-1121269__var-5	150	+	[ID=PF3D7_0726400;description=conserved Plasmodium membrane protein, unknown function;]
Pf3D7_07_v3	1121367	1121396	Pf3D7_07_v3-1121363-1121763__var-0	29	+	[ID=PF3D7_0726400;description=conserved Plasmodium membrane protein, unknown function;]
Pf3D7_07_v3	1121668	1121697	Pf3D7_07_v3-1121363-1121763__var-1	29	+	[ID=PF3D7_0726400;description=conserved Plasmodium membrane protein, unknown function;]
Pf3D7_07_v3	1122228	1122305	Pf3D7_07_v3-1121999-1122849__var-0	77	+	[ID=PF3D7_0726400;description=conserved Plasmodium membrane protein, unknown function;]
Pf3D7_07_v3	1122340	1122414	Pf3D7_07_v3-1121999-1122849__var-1	74	+	[ID=PF3D7_0726400;description=conserved Plasmodium membrane protein, unknown function;]
Pf3D7_07_v3	1122411	1122448	Pf3D7_07_v3-1121999-1122849__var-2	37	+	[ID=PF3D7_0726400;description=conserved Plasmodium membrane protein, unknown function;]
Pf3D7_07_v3	1122513	1122552	Pf3D7_07_v3-1121999-1122849__var-3	39	+	[ID=PF3D7_0726400;description=conserved Plasmodium membrane protein, unknown function;]
Pf3D7_07_v3	1122542	1122579	Pf3D7_07_v3-1121999-1122849__var-4	37	+	[ID=PF3D7_0726400;description=conserved Plasmodium membrane protein, unknown function;]
Pf3D7_07_v3	1122583	1122620	Pf3D7_07_v3-1121999-1122849__var-5	37	+	[ID=PF3D7_0726400;description=conserved Plasmodium membrane protein, unknown function;]
Pf3D7_07_v3	1123224	1123253	Pf3D7_07_v3-1123211-1123661__var-0	29	+	[ID=PF3D7_0726400;description=conserved Plasmodium membrane protein, unknown function;]
Pf3D7_07_v3	1123342	1123371	Pf3D7_07_v3-1123211-1123661__var-1	29	+	[ID=PF3D7_0726400;description=conserved Plasmodium membrane protein, unknown function;]
Pf3D7_07_v3	1123845	1124045	Pf3D7_07_v3-1123845-1124045__subseq-0	200	+	[ID=PF3D7_0726400;description=conserved Plasmodium membrane protein, unknown function;]
Pf3D7_07_v3	1124290	1124319	Pf3D7_07_v3-1124266-1124466__var-0	29	+	[ID=PF3D7_0726400;description=conserved Plasmodium membrane protein, unknown function;]
Pf3D7_07_v3	1124333	1124362	Pf3D7_07_v3-1124266-1124466__var-1	29	+	[ID=PF3D7_0726400;description=conserved Plasmodium membrane protein, unknown function;]
Pf3D7_07_v3	1127544	1127573	Pf3D7_07_v3-1127330-1128380__var-0	29	+	[ID=PF3D7_0726500;description=ubiquitin carboxyl-terminal hydrolase, putative;]
Pf3D7_07_v3	1127646	1127675	Pf3D7_07_v3-1127330-1128380__var-1	29	+	[ID=PF3D7_0726500;description=ubiquitin carboxyl-terminal hydrolase, putative;]
Pf3D7_07_v3	1127878	1127907	Pf3D7_07_v3-1127330-1128380__var-2	29	+	[ID=PF3D7_0726500;description=ubiquitin carboxyl-terminal hydrolase, putative;]
Pf3D7_07_v3	1128636	1128665	Pf3D7_07_v3-1128552-1128802__var-0	29	+	[ID=PF3D7_0726500;description=ubiquitin carboxyl-terminal hydrolase, putative;]
Pf3D7_07_v3	1128938	1128963	Pf3D7_07_v3-1128938-1129238__var-0	25	+	[ID=PF3D7_0726500;description=ubiquitin carboxyl-terminal hydrolase, putative;]
Pf3D7_07_v3	1129103	1129132	Pf3D7_07_v3-1128938-1129238__var-1	29	+	[ID=PF3D7_0726500;description=ubiquitin carboxyl-terminal hydrolase, putative;]
Pf3D7_07_v3	1129125	1129168	Pf3D7_07_v3-1128938-1129238__var-2	43	+	[ID=PF3D7_0726500;description=ubiquitin carboxyl-terminal hydrolase, putative;]
Pf3D7_07_v3	1129162	1129191	Pf3D7_07_v3-1128938-1129238__var-3	29	+	[ID=PF3D7_0726500;description=ubiquitin carboxyl-terminal hydrolase, putative;]
Pf3D7_07_v3	1129206	1129238	Pf3D7_07_v3-1128938-1129238__var-4	32	+	[ID=PF3D7_0726500;description=ubiquitin carboxyl-terminal hydrolase, putative;]
Pf3D7_07_v3	1129513	1129542	Pf3D7_07_v3-1129313-1129563__var-0	29	+	[ID=PF3D7_0726500;description=ubiquitin carboxyl-terminal hydrolase, putative;]
Pf3D7_07_v3	1130364	1130393	Pf3D7_07_v3-1130274-1131024__var-0	29	+	[ID=PF3D7_0726500;description=ubiquitin carboxyl-terminal hydrolase, putative;]
Pf3D7_07_v3	1130475	1130504	Pf3D7_07_v3-1130274-1131024__var-1	29	+	[ID=PF3D7_0726500;description=ubiquitin carboxyl-terminal hydrolase, putative;]
Pf3D7_07_v3	1130575	1130610	Pf3D7_07_v3-1130274-1131024__var-2	35	+	[ID=PF3D7_0726500;description=ubiquitin carboxyl-terminal hydrolase, putative;]
Pf3D7_07_v3	1130622	1130651	Pf3D7_07_v3-1130274-1131024__var-3	29	+	[ID=PF3D7_0726500;description=ubiquitin carboxyl-terminal hydrolase, putative;]
Pf3D7_07_v3	1130951	1130980	Pf3D7_07_v3-1130274-1131024__var-4	29	+	[ID=PF3D7_0726500;description=ubiquitin carboxyl-terminal hydrolase, putative;]
Pf3D7_07_v3	1131121	1131150	Pf3D7_07_v3-1131082-1131382__var-0	29	+	[ID=PF3D7_0726500;description=ubiquitin carboxyl-terminal hydrolase, putative;]
Pf3D7_07_v3	1131766	1131825	Pf3D7_07_v3-1131571-1132221__var-0	59	+	[ID=PF3D7_0726500;description=ubiquitin carboxyl-terminal hydrolase, putative;]
Pf3D7_07_v3	1131839	1131898	Pf3D7_07_v3-1131571-1132221__var-1	59	+	[ID=PF3D7_0726500;description=ubiquitin carboxyl-terminal hydrolase, putative;]
Pf3D7_07_v3	1131974	1132036	Pf3D7_07_v3-1131571-1132221__var-2	62	+	[ID=PF3D7_0726500;description=ubiquitin carboxyl-terminal hydrolase, putative;]
Pf3D7_07_v3	1132030	1132095	Pf3D7_07_v3-1131571-1132221__var-3	65	+	[ID=PF3D7_0726500;description=ubiquitin carboxyl-terminal hydrolase, putative;]
Pf3D7_07_v3	1132121	1132180	Pf3D7_07_v3-1131571-1132221__var-4	59	+	[ID=PF3D7_0726500;description=ubiquitin carboxyl-terminal hydrolase, putative;]
Pf3D7_07_v3	1132168	1132221	Pf3D7_07_v3-1131571-1132221__var-5	53	+	[ID=PF3D7_0726500;description=ubiquitin carboxyl-terminal hydrolase, putative;]
Pf3D7_07_v3	1132445	1132495	Pf3D7_07_v3-1132328-1134278__var-00	50	+	[ID=PF3D7_0726500;description=ubiquitin carboxyl-terminal hydrolase, putative;]
Pf3D7_07_v3	1132517	1132552	Pf3D7_07_v3-1132328-1134278__var-01	35	+	[ID=PF3D7_0726500;description=ubiquitin carboxyl-terminal hydrolase, putative;]
Pf3D7_07_v3	1132770	1132805	Pf3D7_07_v3-1132328-1134278__var-02	35	+	[ID=PF3D7_0726500;description=ubiquitin carboxyl-terminal hydrolase, putative;]
Pf3D7_07_v3	1132804	1132839	Pf3D7_07_v3-1132328-1134278__var-03	35	+	[ID=PF3D7_0726500;description=ubiquitin carboxyl-terminal hydrolase, putative;]
Pf3D7_07_v3	1132897	1132932	Pf3D7_07_v3-1132328-1134278__var-04	35	+	[ID=PF3D7_0726500;description=ubiquitin carboxyl-terminal hydrolase, putative;]
Pf3D7_07_v3	1133637	1133672	Pf3D7_07_v3-1132328-1134278__var-05	35	+	[ID=PF3D7_0726500;description=ubiquitin carboxyl-terminal hydrolase, putative;]
Pf3D7_07_v3	1133668	1133703	Pf3D7_07_v3-1132328-1134278__var-06	35	+	[ID=PF3D7_0726500;description=ubiquitin carboxyl-terminal hydrolase, putative;]
Pf3D7_07_v3	1133913	1133949	Pf3D7_07_v3-1132328-1134278__var-07	36	+	[ID=PF3D7_0726500;description=ubiquitin carboxyl-terminal hydrolase, putative;]
Pf3D7_07_v3	1134166	1134201	Pf3D7_07_v3-1132328-1134278__var-08	35	+	[ID=PF3D7_0726500;description=ubiquitin carboxyl-terminal hydrolase, putative;]
Pf3D7_07_v3	1134237	1134272	Pf3D7_07_v3-1132328-1134278__var-09	35	+	[ID=PF3D7_0726500;description=ubiquitin carboxyl-terminal hydrolase, putative;]
Pf3D7_07_v3	1135176	1135221	Pf3D7_07_v3-1135052-1135452__var-0	45	+	[ID=PF3D7_0726500;description=ubiquitin carboxyl-terminal hydrolase, putative;]
Pf3D7_07_v3	1135208	1135260	Pf3D7_07_v3-1135052-1135452__var-1	52	+	[ID=PF3D7_0726500;description=ubiquitin carboxyl-terminal hydrolase, putative;]
Pf3D7_07_v3	1135290	1135321	Pf3D7_07_v3-1135052-1135452__var-2	31	+	[ID=PF3D7_0726500;description=ubiquitin carboxyl-terminal hydrolase, putative;]
Pf3D7_07_v3	1135340	1135371	Pf3D7_07_v3-1135052-1135452__var-3	31	+	[ID=PF3D7_0726500;description=ubiquitin carboxyl-terminal hydrolase, putative;]
Pf3D7_07_v3	1135571	1135604	Pf3D7_07_v3-1135564-1136514__var-0	33	+	[ID=PF3D7_0726500;description=ubiquitin carboxyl-terminal hydrolase, putative;]
Pf3D7_07_v3	1135629	1135658	Pf3D7_07_v3-1135564-1136514__var-1	29	+	[ID=PF3D7_0726500;description=ubiquitin carboxyl-terminal hydrolase, putative;]
Pf3D7_07_v3	1135663	1135692	Pf3D7_07_v3-1135564-1136514__var-2	29	+	[ID=PF3D7_0726500;description=ubiquitin carboxyl-terminal hydrolase, putative;]
Pf3D7_07_v3	1136126	1136155	Pf3D7_07_v3-1135564-1136514__var-3	29	+	[ID=PF3D7_0726500;description=ubiquitin carboxyl-terminal hydrolase, putative;]
Pf3D7_07_v3	1139945	1139974	Pf3D7_07_v3-1139622-1140022__var-0	29	+	NA
Pf3D7_07_v3	1140461	1140490	Pf3D7_07_v3-1140459-1141059__var-0	29	+	[ID=PF3D7_0726600;description=conserved Plasmodium protein, unknown function;]
Pf3D7_07_v3	1140524	1140553	Pf3D7_07_v3-1140459-1141059__var-1	29	+	[ID=PF3D7_0726600;description=conserved Plasmodium protein, unknown function;]
Pf3D7_07_v3	1140583	1140612	Pf3D7_07_v3-1140459-1141059__var-2	29	+	[ID=PF3D7_0726600;description=conserved Plasmodium protein, unknown function;]
Pf3D7_07_v3	1140931	1140960	Pf3D7_07_v3-1140459-1141059__var-3	29	+	[ID=PF3D7_0726600;description=conserved Plasmodium protein, unknown function;]
Pf3D7_07_v3	1140963	1140992	Pf3D7_07_v3-1140459-1141059__var-4	29	+	[ID=PF3D7_0726600;description=conserved Plasmodium protein, unknown function;]
Pf3D7_07_v3	1141288	1141347	Pf3D7_07_v3-1141195-1141845__var-0	59	+	[ID=PF3D7_0726600;description=conserved Plasmodium protein, unknown function;]
Pf3D7_07_v3	1141473	1141573	Pf3D7_07_v3-1141195-1141845__var-1	100	+	[ID=PF3D7_0726600;description=conserved Plasmodium protein, unknown function;]
Pf3D7_07_v3	1141547	1141606	Pf3D7_07_v3-1141195-1141845__var-2	59	+	[ID=PF3D7_0726600;description=conserved Plasmodium protein, unknown function;]
Pf3D7_07_v3	1141774	1141845	Pf3D7_07_v3-1141195-1141845__var-3	71	+	[ID=PF3D7_0726600;description=conserved Plasmodium protein, unknown function;]
Pf3D7_07_v3	1141921	1142121	Pf3D7_07_v3-1141921-1142121__subseq-0	200	+	[ID=PF3D7_0726600;description=conserved Plasmodium protein, unknown function;]
Pf3D7_07_v3	1142445	1142483	Pf3D7_07_v3-1142354-1142754__var-0	38	+	[ID=PF3D7_0726600;description=conserved Plasmodium protein, unknown function;]
Pf3D7_07_v3	1142511	1142540	Pf3D7_07_v3-1142354-1142754__var-1	29	+	[ID=PF3D7_0726600;description=conserved Plasmodium protein, unknown function;]
Pf3D7_07_v3	1142552	1142581	Pf3D7_07_v3-1142354-1142754__var-2	29	+	[ID=PF3D7_0726600;description=conserved Plasmodium protein, unknown function;]
Pf3D7_07_v3	1142883	1142912	Pf3D7_07_v3-1142836-1143036__var-0	29	+	NA
Pf3D7_07_v3	1142938	1142967	Pf3D7_07_v3-1142836-1143036__var-1	29	+	NA
Pf3D7_07_v3	1143387	1143416	Pf3D7_07_v3-1143219-1143869__var-0	29	+	[ID=PF3D7_0726700;description=conserved Plasmodium protein, unknown function;]
Pf3D7_07_v3	1143495	1143524	Pf3D7_07_v3-1143219-1143869__var-1	29	+	[ID=PF3D7_0726700;description=conserved Plasmodium protein, unknown function;]
Pf3D7_07_v3	1143555	1143584	Pf3D7_07_v3-1143219-1143869__var-2	29	+	[ID=PF3D7_0726700;description=conserved Plasmodium protein, unknown function;]
Pf3D7_07_v3	1143776	1143805	Pf3D7_07_v3-1143219-1143869__var-3	29	+	[ID=PF3D7_0726700;description=conserved Plasmodium protein, unknown function;]
Pf3D7_07_v3	1144186	1144215	Pf3D7_07_v3-1144020-1144370__var-0	29	+	[ID=PF3D7_0726800;description=dolichyl-diphosphooligosaccharide--protein glycosyltransferase subunit OST2, putative;]
Pf3D7_07_v3	1144283	1144312	Pf3D7_07_v3-1144020-1144370__var-1	29	+	[ID=PF3D7_0726800;description=dolichyl-diphosphooligosaccharide--protein glycosyltransferase subunit OST2, putative;]
Pf3D7_07_v3	1145688	1145717	Pf3D7_07_v3-1145646-1146396__var-0	29	+	[ID=PF3D7_0726900;description=mitochondrial import inner membrane translocase subunit TIM50, putative;]
Pf3D7_07_v3	1145730	1145759	Pf3D7_07_v3-1145646-1146396__var-1	29	+	[ID=PF3D7_0726900;description=mitochondrial import inner membrane translocase subunit TIM50, putative;]
Pf3D7_07_v3	1145943	1145972	Pf3D7_07_v3-1145646-1146396__var-2	29	+	[ID=PF3D7_0726900;description=mitochondrial import inner membrane translocase subunit TIM50, putative;]
Pf3D7_07_v3	1146001	1146030	Pf3D7_07_v3-1145646-1146396__var-3	29	+	[ID=PF3D7_0726900;description=mitochondrial import inner membrane translocase subunit TIM50, putative;]
Pf3D7_07_v3	1146144	1146184	Pf3D7_07_v3-1145646-1146396__var-4	40	+	[ID=PF3D7_0726900;description=mitochondrial import inner membrane translocase subunit TIM50, putative;]
Pf3D7_07_v3	1146184	1146214	Pf3D7_07_v3-1145646-1146396__var-5	30	+	[ID=PF3D7_0726900;description=mitochondrial import inner membrane translocase subunit TIM50, putative;]
Pf3D7_07_v3	1146211	1146247	Pf3D7_07_v3-1145646-1146396__var-6	36	+	[ID=PF3D7_0726900;description=mitochondrial import inner membrane translocase subunit TIM50, putative;]
Pf3D7_07_v3	1146291	1146320	Pf3D7_07_v3-1145646-1146396__var-7	29	+	[ID=PF3D7_0726900;description=mitochondrial import inner membrane translocase subunit TIM50, putative;]
Pf3D7_07_v3	1146452	1146802	Pf3D7_07_v3-1146452-1146802__subseq-0	350	+	[ID=PF3D7_0726900;description=mitochondrial import inner membrane translocase subunit TIM50, putative;]
Pf3D7_07_v3	1146900	1146929	Pf3D7_07_v3-1146867-1147167__var-0	29	+	[ID=PF3D7_0726900;description=mitochondrial import inner membrane translocase subunit TIM50, putative;]
Pf3D7_07_v3	1147548	1147571	Pf3D7_07_v3-1147548-1147998__var-0	23	+	[ID=PF3D7_0727000;description=vacuolar protein sorting-associated protein 53, putative;]
Pf3D7_07_v3	1147732	1147761	Pf3D7_07_v3-1147548-1147998__var-1	29	+	[ID=PF3D7_0727000;description=vacuolar protein sorting-associated protein 53, putative;]
Pf3D7_07_v3	1147788	1147817	Pf3D7_07_v3-1147548-1147998__var-2	29	+	[ID=PF3D7_0727000;description=vacuolar protein sorting-associated protein 53, putative;]
Pf3D7_07_v3	1148080	1148155	Pf3D7_07_v3-1148048-1148998__var-0	75	+	[ID=PF3D7_0727000;description=vacuolar protein sorting-associated protein 53, putative;]
Pf3D7_07_v3	1148306	1148381	Pf3D7_07_v3-1148048-1148998__var-1	75	+	[ID=PF3D7_0727000;description=vacuolar protein sorting-associated protein 53, putative;]
Pf3D7_07_v3	1148651	1148726	Pf3D7_07_v3-1148048-1148998__var-2	75	+	[ID=PF3D7_0727000;description=vacuolar protein sorting-associated protein 53, putative;]
Pf3D7_07_v3	1148719	1148815	Pf3D7_07_v3-1148048-1148998__var-3	96	+	[ID=PF3D7_0727000;description=vacuolar protein sorting-associated protein 53, putative;]
Pf3D7_07_v3	1148821	1148896	Pf3D7_07_v3-1148048-1148998__var-4	75	+	[ID=PF3D7_0727000;description=vacuolar protein sorting-associated protein 53, putative;]
Pf3D7_07_v3	1149240	1149273	Pf3D7_07_v3-1149221-1149771__var-0	33	+	[ID=PF3D7_0727000;description=vacuolar protein sorting-associated protein 53, putative;]
Pf3D7_07_v3	1149278	1149317	Pf3D7_07_v3-1149221-1149771__var-1	39	+	[ID=PF3D7_0727000;description=vacuolar protein sorting-associated protein 53, putative;]
Pf3D7_07_v3	1149390	1149427	Pf3D7_07_v3-1149221-1149771__var-2	37	+	[ID=PF3D7_0727000;description=vacuolar protein sorting-associated protein 53, putative;]
Pf3D7_07_v3	1149439	1149468	Pf3D7_07_v3-1149221-1149771__var-3	29	+	[ID=PF3D7_0727000;description=vacuolar protein sorting-associated protein 53, putative;]
Pf3D7_07_v3	1149475	1149528	Pf3D7_07_v3-1149221-1149771__var-4	53	+	[ID=PF3D7_0727000;description=vacuolar protein sorting-associated protein 53, putative;]
Pf3D7_07_v3	1149596	1149625	Pf3D7_07_v3-1149221-1149771__var-5	29	+	[ID=PF3D7_0727000;description=vacuolar protein sorting-associated protein 53, putative;]
Pf3D7_07_v3	1150333	1150362	Pf3D7_07_v3-1150142-1150792__var-0	29	+	[ID=PF3D7_0727000;description=vacuolar protein sorting-associated protein 53, putative;]
Pf3D7_07_v3	1150402	1150431	Pf3D7_07_v3-1150142-1150792__var-1	29	+	[ID=PF3D7_0727000;description=vacuolar protein sorting-associated protein 53, putative;]
Pf3D7_07_v3	1150485	1150514	Pf3D7_07_v3-1150142-1150792__var-2	29	+	[ID=PF3D7_0727000;description=vacuolar protein sorting-associated protein 53, putative;]
Pf3D7_07_v3	1150651	1150680	Pf3D7_07_v3-1150142-1150792__var-3	29	+	[ID=PF3D7_0727000;description=vacuolar protein sorting-associated protein 53, putative;]
Pf3D7_07_v3	1152334	1152363	Pf3D7_07_v3-1152174-1152474__var-0	29	+	[ID=PF3D7_0727100;description=conserved protein, unknown function;]
Pf3D7_07_v3	1153119	1153184	Pf3D7_07_v3-1153119-1153619__var-0	65	+	[ID=PF3D7_0727100;description=conserved protein, unknown function;]
Pf3D7_07_v3	1153516	1153545	Pf3D7_07_v3-1153119-1153619__var-1	29	+	[ID=PF3D7_0727100;description=conserved protein, unknown function;]
Pf3D7_07_v3	1153862	1153891	Pf3D7_07_v3-1153809-1154559__var-0	29	+	[ID=PF3D7_0727100;description=conserved protein, unknown function;]
Pf3D7_07_v3	1154000	1154029	Pf3D7_07_v3-1153809-1154559__var-1	29	+	[ID=PF3D7_0727100;description=conserved protein, unknown function;]
Pf3D7_07_v3	1154169	1154198	Pf3D7_07_v3-1153809-1154559__var-2	29	+	[ID=PF3D7_0727100;description=conserved protein, unknown function;]
Pf3D7_07_v3	1154188	1154217	Pf3D7_07_v3-1153809-1154559__var-3	29	+	[ID=PF3D7_0727100;description=conserved protein, unknown function;]
Pf3D7_07_v3	1154213	1154242	Pf3D7_07_v3-1153809-1154559__var-4	29	+	[ID=PF3D7_0727100;description=conserved protein, unknown function;]
Pf3D7_07_v3	1154270	1154299	Pf3D7_07_v3-1153809-1154559__var-5	29	+	[ID=PF3D7_0727100;description=conserved protein, unknown function;]
Pf3D7_07_v3	1154440	1154469	Pf3D7_07_v3-1153809-1154559__var-6	29	+	[ID=PF3D7_0727100;description=conserved protein, unknown function;]
Pf3D7_07_v3	1154758	1154992	Pf3D7_07_v3-1154741-1155341__var-0	234	+	[ID=PF3D7_0727100;description=conserved protein, unknown function;]
Pf3D7_07_v3	1155030	1155224	Pf3D7_07_v3-1154741-1155341__var-1	194	+	[ID=PF3D7_0727100;description=conserved protein, unknown function;]
Pf3D7_07_v3	1156075	1156110	Pf3D7_07_v3-1156075-1156325__var-0	35	+	NA
Pf3D7_07_v3	1156153	1156240	Pf3D7_07_v3-1156075-1156325__var-1	87	+	NA
Pf3D7_07_v3	1156256	1156287	Pf3D7_07_v3-1156075-1156325__var-2	31	+	NA
Pf3D7_07_v3	1156298	1156325	Pf3D7_07_v3-1156075-1156325__var-3	27	+	NA
Pf3D7_07_v3	1156627	1156656	Pf3D7_07_v3-1156595-1157945__var-0	29	+	NA
Pf3D7_07_v3	1156771	1156800	Pf3D7_07_v3-1156595-1157945__var-1	29	+	[ID=PF3D7_0727200;description=cysteine desulfurase, putative;]
Pf3D7_07_v3	1156858	1156887	Pf3D7_07_v3-1156595-1157945__var-2	29	+	[ID=PF3D7_0727200;description=cysteine desulfurase, putative;]
Pf3D7_07_v3	1157573	1157602	Pf3D7_07_v3-1156595-1157945__var-3	29	+	[ID=PF3D7_0727200;description=cysteine desulfurase, putative;]
Pf3D7_07_v3	1157686	1157715	Pf3D7_07_v3-1156595-1157945__var-4	29	+	[ID=PF3D7_0727200;description=cysteine desulfurase, putative;]
Pf3D7_07_v3	1157808	1157837	Pf3D7_07_v3-1156595-1157945__var-5	29	+	[ID=PF3D7_0727200;description=cysteine desulfurase, putative;]
Pf3D7_07_v3	1158012	1158041	Pf3D7_07_v3-1158012-1158412__var-0	29	+	[ID=PF3D7_0727200;description=cysteine desulfurase, putative;]
Pf3D7_07_v3	1158036	1158065	Pf3D7_07_v3-1158012-1158412__var-1	29	+	[ID=PF3D7_0727200;description=cysteine desulfurase, putative;]
Pf3D7_07_v3	1158067	1158096	Pf3D7_07_v3-1158012-1158412__var-2	29	+	[ID=PF3D7_0727200;description=cysteine desulfurase, putative;]
Pf3D7_07_v3	1158154	1158183	Pf3D7_07_v3-1158012-1158412__var-3	29	+	[ID=PF3D7_0727200;description=cysteine desulfurase, putative;]
Pf3D7_07_v3	1158194	1158239	Pf3D7_07_v3-1158012-1158412__var-4	45	+	[ID=PF3D7_0727200;description=cysteine desulfurase, putative;]
Pf3D7_07_v3	1158264	1158293	Pf3D7_07_v3-1158012-1158412__var-5	29	+	[ID=PF3D7_0727200;description=cysteine desulfurase, putative;]
Pf3D7_07_v3	1158325	1158354	Pf3D7_07_v3-1158012-1158412__var-6	29	+	[ID=PF3D7_0727200;description=cysteine desulfurase, putative;]
Pf3D7_07_v3	1159718	1159751	Pf3D7_07_v3-1159718-1160818__var-0	33	+	[ID=PF3D7_0727300;description=DNA (cytosine-5)-methyltransferase;]
Pf3D7_07_v3	1159753	1159792	Pf3D7_07_v3-1159718-1160818__var-1	39	+	[ID=PF3D7_0727300;description=DNA (cytosine-5)-methyltransferase;]
Pf3D7_07_v3	1159935	1159974	Pf3D7_07_v3-1159718-1160818__var-2	39	+	[ID=PF3D7_0727300;description=DNA (cytosine-5)-methyltransferase;]
Pf3D7_07_v3	1160062	1160101	Pf3D7_07_v3-1159718-1160818__var-3	39	+	[ID=PF3D7_0727300;description=DNA (cytosine-5)-methyltransferase;]
Pf3D7_07_v3	1160219	1160258	Pf3D7_07_v3-1159718-1160818__var-4	39	+	[ID=PF3D7_0727300;description=DNA (cytosine-5)-methyltransferase;]
Pf3D7_07_v3	1160388	1160427	Pf3D7_07_v3-1159718-1160818__var-5	39	+	[ID=PF3D7_0727300;description=DNA (cytosine-5)-methyltransferase;]
Pf3D7_07_v3	1160411	1160450	Pf3D7_07_v3-1159718-1160818__var-6	39	+	[ID=PF3D7_0727300;description=DNA (cytosine-5)-methyltransferase;]
Pf3D7_07_v3	1160626	1160685	Pf3D7_07_v3-1159718-1160818__var-7	59	+	[ID=PF3D7_0727300;description=DNA (cytosine-5)-methyltransferase;]
Pf3D7_07_v3	1160897	1160926	Pf3D7_07_v3-1160868-1161368__var-0	29	+	[ID=PF3D7_0727300;description=DNA (cytosine-5)-methyltransferase;]
Pf3D7_07_v3	1161025	1161054	Pf3D7_07_v3-1160868-1161368__var-1	29	+	[ID=PF3D7_0727300;description=DNA (cytosine-5)-methyltransferase;]
Pf3D7_07_v3	1161054	1161083	Pf3D7_07_v3-1160868-1161368__var-2	29	+	[ID=PF3D7_0727300;description=DNA (cytosine-5)-methyltransferase;]
Pf3D7_07_v3	1161449	1161472	Pf3D7_07_v3-1161449-1161799__var-0	23	+	[ID=PF3D7_0727300;description=DNA (cytosine-5)-methyltransferase;]
Pf3D7_07_v3	1161476	1161505	Pf3D7_07_v3-1161449-1161799__var-1	29	+	[ID=PF3D7_0727300;description=DNA (cytosine-5)-methyltransferase;]
Pf3D7_07_v3	1161656	1161693	Pf3D7_07_v3-1161449-1161799__var-2	37	+	[ID=PF3D7_0727300;description=DNA (cytosine-5)-methyltransferase;]
Pf3D7_07_v3	1161718	1161747	Pf3D7_07_v3-1161449-1161799__var-3	29	+	[ID=PF3D7_0727300;description=DNA (cytosine-5)-methyltransferase;]
Pf3D7_07_v3	1161760	1161790	Pf3D7_07_v3-1161449-1161799__var-4	30	+	[ID=PF3D7_0727300;description=DNA (cytosine-5)-methyltransferase;]
Pf3D7_07_v3	1163324	1163356	Pf3D7_07_v3-1163142-1163842__var-0	32	+	[ID=PF3D7_0727400;description=proteasome subunit alpha type-5, putative;]
Pf3D7_07_v3	1163771	1163815	Pf3D7_07_v3-1163142-1163842__var-1	44	+	[ID=PF3D7_0727400;description=proteasome subunit alpha type-5, putative;]
Pf3D7_07_v3	1163807	1163842	Pf3D7_07_v3-1163142-1163842__var-2	35	+	[ID=PF3D7_0727400;description=proteasome subunit alpha type-5, putative;]
Pf3D7_07_v3	1165093	1165122	Pf3D7_07_v3-1164468-1166218__var-0	29	+	[ID=PF3D7_0727500;description=mTERF domain-containing protein, putative;]
Pf3D7_07_v3	1165306	1165349	Pf3D7_07_v3-1164468-1166218__var-1	43	+	[ID=PF3D7_0727500;description=mTERF domain-containing protein, putative;]
Pf3D7_07_v3	1165516	1165545	Pf3D7_07_v3-1164468-1166218__var-2	29	+	[ID=PF3D7_0727500;description=mTERF domain-containing protein, putative;]
Pf3D7_07_v3	1165640	1165669	Pf3D7_07_v3-1164468-1166218__var-3	29	+	[ID=PF3D7_0727500;description=mTERF domain-containing protein, putative;]
Pf3D7_07_v3	1165850	1165879	Pf3D7_07_v3-1164468-1166218__var-4	29	+	[ID=PF3D7_0727500;description=mTERF domain-containing protein, putative;]
Pf3D7_07_v3	1166023	1166052	Pf3D7_07_v3-1164468-1166218__var-5	29	+	[ID=PF3D7_0727500;description=mTERF domain-containing protein, putative;]
Pf3D7_07_v3	1166124	1166153	Pf3D7_07_v3-1164468-1166218__var-6	29	+	[ID=PF3D7_0727500;description=mTERF domain-containing protein, putative;]
Pf3D7_07_v3	1166183	1166218	Pf3D7_07_v3-1164468-1166218__var-7	35	+	[ID=PF3D7_0727500;description=mTERF domain-containing protein, putative;]
Pf3D7_07_v3	1166309	1166347	Pf3D7_07_v3-1166309-1166609__var-0	38	+	[ID=PF3D7_0727500;description=mTERF domain-containing protein, putative;]
Pf3D7_07_v3	1166384	1166425	Pf3D7_07_v3-1166309-1166609__var-1	41	+	[ID=PF3D7_0727500;description=mTERF domain-containing protein, putative;]
Pf3D7_07_v3	1166412	1166451	Pf3D7_07_v3-1166309-1166609__var-2	39	+	[ID=PF3D7_0727500;description=mTERF domain-containing protein, putative;]
Pf3D7_07_v3	1166516	1166555	Pf3D7_07_v3-1166309-1166609__var-3	39	+	[ID=PF3D7_0727500;description=mTERF domain-containing protein, putative;]
Pf3D7_07_v3	1167567	1167604	Pf3D7_07_v3-1167425-1168325__var-0	37	+	[ID=PF3D7_0727600;description=conserved Plasmodium protein, unknown function;]
Pf3D7_07_v3	1167697	1167726	Pf3D7_07_v3-1167425-1168325__var-1	29	+	[ID=PF3D7_0727600;description=conserved Plasmodium protein, unknown function;]
Pf3D7_07_v3	1168103	1168144	Pf3D7_07_v3-1167425-1168325__var-2	41	+	[ID=PF3D7_0727600;description=conserved Plasmodium protein, unknown function;]
Pf3D7_07_v3	1168143	1168186	Pf3D7_07_v3-1167425-1168325__var-3	43	+	[ID=PF3D7_0727600;description=conserved Plasmodium protein, unknown function;]
Pf3D7_07_v3	1168232	1168264	Pf3D7_07_v3-1167425-1168325__var-4	32	+	[ID=PF3D7_0727600;description=conserved Plasmodium protein, unknown function;]
Pf3D7_07_v3	1168418	1168457	Pf3D7_07_v3-1168418-1168618__var-0	39	+	[ID=PF3D7_0727600;description=conserved Plasmodium protein, unknown function;]
Pf3D7_07_v3	1168541	1168570	Pf3D7_07_v3-1168418-1168618__var-1	29	+	[ID=PF3D7_0727600;description=conserved Plasmodium protein, unknown function;]
Pf3D7_07_v3	1168760	1168791	Pf3D7_07_v3-1168759-1170359__var-00	31	+	[ID=PF3D7_0727600;description=conserved Plasmodium protein, unknown function;]
Pf3D7_07_v3	1168790	1168821	Pf3D7_07_v3-1168759-1170359__var-01	31	+	[ID=PF3D7_0727600;description=conserved Plasmodium protein, unknown function;]
Pf3D7_07_v3	1169110	1169141	Pf3D7_07_v3-1168759-1170359__var-02	31	+	[ID=PF3D7_0727600;description=conserved Plasmodium protein, unknown function;]
Pf3D7_07_v3	1169180	1169211	Pf3D7_07_v3-1168759-1170359__var-03	31	+	[ID=PF3D7_0727600;description=conserved Plasmodium protein, unknown function;]
Pf3D7_07_v3	1169318	1169349	Pf3D7_07_v3-1168759-1170359__var-04	31	+	[ID=PF3D7_0727600;description=conserved Plasmodium protein, unknown function;]
Pf3D7_07_v3	1169460	1169491	Pf3D7_07_v3-1168759-1170359__var-05	31	+	[ID=PF3D7_0727600;description=conserved Plasmodium protein, unknown function;]
Pf3D7_07_v3	1169585	1169616	Pf3D7_07_v3-1168759-1170359__var-06	31	+	[ID=PF3D7_0727600;description=conserved Plasmodium protein, unknown function;]
Pf3D7_07_v3	1169619	1169650	Pf3D7_07_v3-1168759-1170359__var-07	31	+	[ID=PF3D7_0727600;description=conserved Plasmodium protein, unknown function;]
Pf3D7_07_v3	1169707	1169738	Pf3D7_07_v3-1168759-1170359__var-08	31	+	[ID=PF3D7_0727600;description=conserved Plasmodium protein, unknown function;]
Pf3D7_07_v3	1169792	1169825	Pf3D7_07_v3-1168759-1170359__var-09	33	+	[ID=PF3D7_0727600;description=conserved Plasmodium protein, unknown function;]
Pf3D7_07_v3	1169812	1169843	Pf3D7_07_v3-1168759-1170359__var-10	31	+	[ID=PF3D7_0727600;description=conserved Plasmodium protein, unknown function;]
Pf3D7_07_v3	1169907	1169938	Pf3D7_07_v3-1168759-1170359__var-11	31	+	[ID=PF3D7_0727600;description=conserved Plasmodium protein, unknown function;]
Pf3D7_07_v3	1169927	1169958	Pf3D7_07_v3-1168759-1170359__var-12	31	+	[ID=PF3D7_0727600;description=conserved Plasmodium protein, unknown function;]
Pf3D7_07_v3	1170027	1170058	Pf3D7_07_v3-1168759-1170359__var-13	31	+	[ID=PF3D7_0727600;description=conserved Plasmodium protein, unknown function;]
Pf3D7_07_v3	1170104	1170136	Pf3D7_07_v3-1168759-1170359__var-14	32	+	[ID=PF3D7_0727600;description=conserved Plasmodium protein, unknown function;]
Pf3D7_07_v3	1170128	1170159	Pf3D7_07_v3-1168759-1170359__var-15	31	+	[ID=PF3D7_0727600;description=conserved Plasmodium protein, unknown function;]
Pf3D7_07_v3	1170163	1170194	Pf3D7_07_v3-1168759-1170359__var-16	31	+	[ID=PF3D7_0727600;description=conserved Plasmodium protein, unknown function;]
Pf3D7_07_v3	1170182	1170224	Pf3D7_07_v3-1168759-1170359__var-17	42	+	[ID=PF3D7_0727600;description=conserved Plasmodium protein, unknown function;]
Pf3D7_07_v3	1170243	1170274	Pf3D7_07_v3-1168759-1170359__var-18	31	+	[ID=PF3D7_0727600;description=conserved Plasmodium protein, unknown function;]
Pf3D7_07_v3	1170334	1170359	Pf3D7_07_v3-1168759-1170359__var-19	25	+	[ID=PF3D7_0727600;description=conserved Plasmodium protein, unknown function;]
Pf3D7_07_v3	1171334	1171363	Pf3D7_07_v3-1171292-1171692__var-0	29	+	[ID=PF3D7_0727700;description=conserved Plasmodium protein, unknown function;]
Pf3D7_07_v3	1171801	1171830	Pf3D7_07_v3-1171791-1172291__var-0	29	+	[ID=PF3D7_0727700;description=conserved Plasmodium protein, unknown function;]
Pf3D7_07_v3	1171825	1171856	Pf3D7_07_v3-1171791-1172291__var-1	31	+	[ID=PF3D7_0727700;description=conserved Plasmodium protein, unknown function;]
Pf3D7_07_v3	1171874	1171916	Pf3D7_07_v3-1171791-1172291__var-2	42	+	[ID=PF3D7_0727700;description=conserved Plasmodium protein, unknown function;]
Pf3D7_07_v3	1171915	1171944	Pf3D7_07_v3-1171791-1172291__var-3	29	+	[ID=PF3D7_0727700;description=conserved Plasmodium protein, unknown function;]
Pf3D7_07_v3	1171982	1172011	Pf3D7_07_v3-1171791-1172291__var-4	29	+	[ID=PF3D7_0727700;description=conserved Plasmodium protein, unknown function;]
Pf3D7_07_v3	1172260	1172291	Pf3D7_07_v3-1171791-1172291__var-5	31	+	[ID=PF3D7_0727700;description=conserved Plasmodium protein, unknown function;]
Pf3D7_07_v3	1172481	1172521	Pf3D7_07_v3-1172466-1173116__var-0	40	+	[ID=PF3D7_0727700;description=conserved Plasmodium protein, unknown function;]
Pf3D7_07_v3	1172599	1172639	Pf3D7_07_v3-1172466-1173116__var-1	40	+	[ID=PF3D7_0727700;description=conserved Plasmodium protein, unknown function;]
Pf3D7_07_v3	1172774	1172803	Pf3D7_07_v3-1172466-1173116__var-2	29	+	[ID=PF3D7_0727700;description=conserved Plasmodium protein, unknown function;]
Pf3D7_07_v3	1172881	1172910	Pf3D7_07_v3-1172466-1173116__var-3	29	+	[ID=PF3D7_0727700;description=conserved Plasmodium protein, unknown function;]
Pf3D7_07_v3	1172911	1172940	Pf3D7_07_v3-1172466-1173116__var-4	29	+	[ID=PF3D7_0727700;description=conserved Plasmodium protein, unknown function;]
Pf3D7_07_v3	1172974	1173003	Pf3D7_07_v3-1172466-1173116__var-5	29	+	[ID=PF3D7_0727700;description=conserved Plasmodium protein, unknown function;]
Pf3D7_07_v3	1172991	1173020	Pf3D7_07_v3-1172466-1173116__var-6	29	+	[ID=PF3D7_0727700;description=conserved Plasmodium protein, unknown function;]
Pf3D7_07_v3	1173273	1173302	Pf3D7_07_v3-1173199-1173499__var-0	29	+	[ID=PF3D7_0727700;description=conserved Plasmodium protein, unknown function;]
Pf3D7_07_v3	1173298	1173327	Pf3D7_07_v3-1173199-1173499__var-1	29	+	[ID=PF3D7_0727700;description=conserved Plasmodium protein, unknown function;]
Pf3D7_07_v3	1173386	1173415	Pf3D7_07_v3-1173199-1173499__var-2	29	+	[ID=PF3D7_0727700;description=conserved Plasmodium protein, unknown function;]
Pf3D7_07_v3	1173467	1173496	Pf3D7_07_v3-1173199-1173499__var-3	29	+	[ID=PF3D7_0727700;description=conserved Plasmodium protein, unknown function;]
Pf3D7_07_v3	1173736	1173765	Pf3D7_07_v3-1173713-1174163__var-0	29	+	[ID=PF3D7_0727700;description=conserved Plasmodium protein, unknown function;]
Pf3D7_07_v3	1173944	1173973	Pf3D7_07_v3-1173713-1174163__var-1	29	+	[ID=PF3D7_0727700;description=conserved Plasmodium protein, unknown function;]
Pf3D7_07_v3	1174067	1174096	Pf3D7_07_v3-1173713-1174163__var-2	29	+	[ID=PF3D7_0727700;description=conserved Plasmodium protein, unknown function;]
Pf3D7_07_v3	1174090	1174119	Pf3D7_07_v3-1173713-1174163__var-3	29	+	[ID=PF3D7_0727700;description=conserved Plasmodium protein, unknown function;]
Pf3D7_07_v3	1175377	1175394	Pf3D7_07_v3-1175377-1175627__var-0	17	+	NA
Pf3D7_07_v3	1175386	1175415	Pf3D7_07_v3-1175377-1175627__var-1	29	+	NA
Pf3D7_07_v3	1175470	1175499	Pf3D7_07_v3-1175377-1175627__var-2	29	+	NA
Pf3D7_07_v3	1175502	1175531	Pf3D7_07_v3-1175377-1175627__var-3	29	+	NA
Pf3D7_07_v3	1175539	1175568	Pf3D7_07_v3-1175377-1175627__var-4	29	+	NA
Pf3D7_07_v3	1175558	1175587	Pf3D7_07_v3-1175377-1175627__var-5	29	+	NA
Pf3D7_07_v3	1175586	1175615	Pf3D7_07_v3-1175377-1175627__var-6	29	+	NA
Pf3D7_07_v3	1175882	1175935	Pf3D7_07_v3-1175882-1177682__var-00	53	+	NA
Pf3D7_07_v3	1176145	1176196	Pf3D7_07_v3-1175882-1177682__var-01	51	+	[ID=PF3D7_0727800;description=cation transporting ATPase, putative;]
Pf3D7_07_v3	1176176	1176229	Pf3D7_07_v3-1175882-1177682__var-02	53	+	[ID=PF3D7_0727800;description=cation transporting ATPase, putative;]
Pf3D7_07_v3	1176230	1176281	Pf3D7_07_v3-1175882-1177682__var-03	51	+	[ID=PF3D7_0727800;description=cation transporting ATPase, putative;]
Pf3D7_07_v3	1176276	1176327	Pf3D7_07_v3-1175882-1177682__var-04	51	+	[ID=PF3D7_0727800;description=cation transporting ATPase, putative;]
Pf3D7_07_v3	1176303	1176354	Pf3D7_07_v3-1175882-1177682__var-05	51	+	[ID=PF3D7_0727800;description=cation transporting ATPase, putative;]
Pf3D7_07_v3	1176341	1176392	Pf3D7_07_v3-1175882-1177682__var-06	51	+	[ID=PF3D7_0727800;description=cation transporting ATPase, putative;]
Pf3D7_07_v3	1176871	1176922	Pf3D7_07_v3-1175882-1177682__var-07	51	+	[ID=PF3D7_0727800;description=cation transporting ATPase, putative;]
Pf3D7_07_v3	1176997	1177048	Pf3D7_07_v3-1175882-1177682__var-08	51	+	[ID=PF3D7_0727800;description=cation transporting ATPase, putative;]
Pf3D7_07_v3	1177090	1177141	Pf3D7_07_v3-1175882-1177682__var-09	51	+	[ID=PF3D7_0727800;description=cation transporting ATPase, putative;]
Pf3D7_07_v3	1177121	1177172	Pf3D7_07_v3-1175882-1177682__var-10	51	+	[ID=PF3D7_0727800;description=cation transporting ATPase, putative;]
Pf3D7_07_v3	1177294	1177345	Pf3D7_07_v3-1175882-1177682__var-11	51	+	[ID=PF3D7_0727800;description=cation transporting ATPase, putative;]
Pf3D7_07_v3	1177321	1177372	Pf3D7_07_v3-1175882-1177682__var-12	51	+	[ID=PF3D7_0727800;description=cation transporting ATPase, putative;]
Pf3D7_07_v3	1177395	1177446	Pf3D7_07_v3-1175882-1177682__var-13	51	+	[ID=PF3D7_0727800;description=cation transporting ATPase, putative;]
Pf3D7_07_v3	1177631	1177682	Pf3D7_07_v3-1175882-1177682__var-14	51	+	[ID=PF3D7_0727800;description=cation transporting ATPase, putative;]
Pf3D7_07_v3	1178361	1178390	Pf3D7_07_v3-1178101-1178901__var-0	29	+	[ID=PF3D7_0727800;description=cation transporting ATPase, putative;]
Pf3D7_07_v3	1178391	1178423	Pf3D7_07_v3-1178101-1178901__var-1	32	+	[ID=PF3D7_0727800;description=cation transporting ATPase, putative;]
Pf3D7_07_v3	1178538	1178567	Pf3D7_07_v3-1178101-1178901__var-2	29	+	[ID=PF3D7_0727800;description=cation transporting ATPase, putative;]
Pf3D7_07_v3	1178736	1178786	Pf3D7_07_v3-1178101-1178901__var-3	50	+	[ID=PF3D7_0727800;description=cation transporting ATPase, putative;]
Pf3D7_07_v3	1178844	1178873	Pf3D7_07_v3-1178101-1178901__var-4	29	+	[ID=PF3D7_0727800;description=cation transporting ATPase, putative;]
Pf3D7_07_v3	1178862	1178891	Pf3D7_07_v3-1178101-1178901__var-5	29	+	[ID=PF3D7_0727800;description=cation transporting ATPase, putative;]
Pf3D7_07_v3	1179138	1179172	Pf3D7_07_v3-1179040-1179340__var-0	34	+	[ID=PF3D7_0727800;description=cation transporting ATPase, putative;]
Pf3D7_07_v3	1179229	1179274	Pf3D7_07_v3-1179040-1179340__var-1	45	+	[ID=PF3D7_0727800;description=cation transporting ATPase, putative;]
Pf3D7_07_v3	1179275	1179304	Pf3D7_07_v3-1179040-1179340__var-2	29	+	[ID=PF3D7_0727800;description=cation transporting ATPase, putative;]
Pf3D7_07_v3	1179648	1179677	Pf3D7_07_v3-1179517-1181717__var-00	29	+	[ID=PF3D7_0727800;description=cation transporting ATPase, putative;]
Pf3D7_07_v3	1179834	1179863	Pf3D7_07_v3-1179517-1181717__var-01	29	+	[ID=PF3D7_0727800;description=cation transporting ATPase, putative;]
Pf3D7_07_v3	1179855	1179884	Pf3D7_07_v3-1179517-1181717__var-02	29	+	[ID=PF3D7_0727800;description=cation transporting ATPase, putative;]
Pf3D7_07_v3	1179985	1180014	Pf3D7_07_v3-1179517-1181717__var-03	29	+	[ID=PF3D7_0727800;description=cation transporting ATPase, putative;]
Pf3D7_07_v3	1180006	1180036	Pf3D7_07_v3-1179517-1181717__var-04	30	+	[ID=PF3D7_0727800;description=cation transporting ATPase, putative;]
Pf3D7_07_v3	1180089	1180118	Pf3D7_07_v3-1179517-1181717__var-05	29	+	[ID=PF3D7_0727800;description=cation transporting ATPase, putative;]
Pf3D7_07_v3	1180267	1180296	Pf3D7_07_v3-1179517-1181717__var-06	29	+	[ID=PF3D7_0727800;description=cation transporting ATPase, putative;]
Pf3D7_07_v3	1180432	1180461	Pf3D7_07_v3-1179517-1181717__var-07	29	+	[ID=PF3D7_0727800;description=cation transporting ATPase, putative;]
Pf3D7_07_v3	1180581	1180610	Pf3D7_07_v3-1179517-1181717__var-08	29	+	[ID=PF3D7_0727800;description=cation transporting ATPase, putative;]
Pf3D7_07_v3	1180650	1180679	Pf3D7_07_v3-1179517-1181717__var-09	29	+	[ID=PF3D7_0727800;description=cation transporting ATPase, putative;]
Pf3D7_07_v3	1181490	1181519	Pf3D7_07_v3-1179517-1181717__var-10	29	+	[ID=PF3D7_0727800;description=cation transporting ATPase, putative;]
Pf3D7_07_v3	1181690	1181717	Pf3D7_07_v3-1179517-1181717__var-11	27	+	[ID=PF3D7_0727800;description=cation transporting ATPase, putative;]
Pf3D7_07_v3	1182070	1182114	Pf3D7_07_v3-1182048-1182298__var-0	44	+	NA
Pf3D7_07_v3	1182152	1182181	Pf3D7_07_v3-1182048-1182298__var-1	29	+	NA
Pf3D7_07_v3	1182471	1182500	Pf3D7_07_v3-1182457-1182657__var-0	29	+	NA
Pf3D7_07_v3	1182587	1182616	Pf3D7_07_v3-1182457-1182657__var-1	29	+	NA
Pf3D7_07_v3	1184418	1184450	Pf3D7_07_v3-1184369-1184769__var-0	32	+	[ID=PF3D7_0727900;description=conserved Plasmodium protein, unknown function;]
Pf3D7_07_v3	1184691	1184720	Pf3D7_07_v3-1184369-1184769__var-1	29	+	[ID=PF3D7_0727900;description=conserved Plasmodium protein, unknown function;]
Pf3D7_07_v3	1184728	1184757	Pf3D7_07_v3-1184369-1184769__var-2	29	+	[ID=PF3D7_0727900;description=conserved Plasmodium protein, unknown function;]
Pf3D7_07_v3	1184927	1184956	Pf3D7_07_v3-1184923-1186223__var-00	29	+	[ID=PF3D7_0727900;description=conserved Plasmodium protein, unknown function;]
Pf3D7_07_v3	1184960	1185007	Pf3D7_07_v3-1184923-1186223__var-01	47	+	[ID=PF3D7_0727900;description=conserved Plasmodium protein, unknown function;]
Pf3D7_07_v3	1185121	1185150	Pf3D7_07_v3-1184923-1186223__var-02	29	+	[ID=PF3D7_0727900;description=conserved Plasmodium protein, unknown function;]
Pf3D7_07_v3	1185442	1185486	Pf3D7_07_v3-1184923-1186223__var-03	44	+	[ID=PF3D7_0727900;description=conserved Plasmodium protein, unknown function;]
Pf3D7_07_v3	1185593	1185622	Pf3D7_07_v3-1184923-1186223__var-04	29	+	[ID=PF3D7_0727900;description=conserved Plasmodium protein, unknown function;]
Pf3D7_07_v3	1185651	1185680	Pf3D7_07_v3-1184923-1186223__var-05	29	+	[ID=PF3D7_0727900;description=conserved Plasmodium protein, unknown function;]
Pf3D7_07_v3	1185682	1185711	Pf3D7_07_v3-1184923-1186223__var-06	29	+	[ID=PF3D7_0727900;description=conserved Plasmodium protein, unknown function;]
Pf3D7_07_v3	1185867	1185896	Pf3D7_07_v3-1184923-1186223__var-07	29	+	[ID=PF3D7_0727900;description=conserved Plasmodium protein, unknown function;]
Pf3D7_07_v3	1185935	1185966	Pf3D7_07_v3-1184923-1186223__var-08	31	+	[ID=PF3D7_0727900;description=conserved Plasmodium protein, unknown function;]
Pf3D7_07_v3	1185989	1186018	Pf3D7_07_v3-1184923-1186223__var-09	29	+	[ID=PF3D7_0727900;description=conserved Plasmodium protein, unknown function;]
Pf3D7_07_v3	1186035	1186064	Pf3D7_07_v3-1184923-1186223__var-10	29	+	[ID=PF3D7_0727900;description=conserved Plasmodium protein, unknown function;]
Pf3D7_07_v3	1186425	1186454	Pf3D7_07_v3-1186425-1186975__var-0	29	+	[ID=PF3D7_0727900;description=conserved Plasmodium protein, unknown function;]
Pf3D7_07_v3	1186488	1186517	Pf3D7_07_v3-1186425-1186975__var-1	29	+	[ID=PF3D7_0727900;description=conserved Plasmodium protein, unknown function;]
Pf3D7_07_v3	1186703	1186732	Pf3D7_07_v3-1186425-1186975__var-2	29	+	[ID=PF3D7_0727900;description=conserved Plasmodium protein, unknown function;]
Pf3D7_07_v3	1187293	1187322	Pf3D7_07_v3-1187290-1188290__var-00	29	+	[ID=PF3D7_0727900;description=conserved Plasmodium protein, unknown function;]
Pf3D7_07_v3	1187341	1187370	Pf3D7_07_v3-1187290-1188290__var-01	29	+	[ID=PF3D7_0727900;description=conserved Plasmodium protein, unknown function;]
Pf3D7_07_v3	1187367	1187398	Pf3D7_07_v3-1187290-1188290__var-02	31	+	[ID=PF3D7_0727900;description=conserved Plasmodium protein, unknown function;]
Pf3D7_07_v3	1187456	1187485	Pf3D7_07_v3-1187290-1188290__var-03	29	+	[ID=PF3D7_0727900;description=conserved Plasmodium protein, unknown function;]
Pf3D7_07_v3	1187514	1187554	Pf3D7_07_v3-1187290-1188290__var-04	40	+	[ID=PF3D7_0727900;description=conserved Plasmodium protein, unknown function;]
Pf3D7_07_v3	1187571	1187600	Pf3D7_07_v3-1187290-1188290__var-05	29	+	[ID=PF3D7_0727900;description=conserved Plasmodium protein, unknown function;]
Pf3D7_07_v3	1187671	1187700	Pf3D7_07_v3-1187290-1188290__var-06	29	+	[ID=PF3D7_0727900;description=conserved Plasmodium protein, unknown function;]
Pf3D7_07_v3	1187701	1187730	Pf3D7_07_v3-1187290-1188290__var-07	29	+	[ID=PF3D7_0727900;description=conserved Plasmodium protein, unknown function;]
Pf3D7_07_v3	1187979	1188008	Pf3D7_07_v3-1187290-1188290__var-08	29	+	[ID=PF3D7_0727900;description=conserved Plasmodium protein, unknown function;]
Pf3D7_07_v3	1188172	1188201	Pf3D7_07_v3-1187290-1188290__var-09	29	+	[ID=PF3D7_0727900;description=conserved Plasmodium protein, unknown function;]
Pf3D7_07_v3	1188778	1188821	Pf3D7_07_v3-1188696-1189546__var-0	43	+	[ID=PF3D7_0727900;description=conserved Plasmodium protein, unknown function;]
Pf3D7_07_v3	1189156	1189185	Pf3D7_07_v3-1188696-1189546__var-1	29	+	[ID=PF3D7_0727900;description=conserved Plasmodium protein, unknown function;]
Pf3D7_07_v3	1189182	1189211	Pf3D7_07_v3-1188696-1189546__var-2	29	+	[ID=PF3D7_0727900;description=conserved Plasmodium protein, unknown function;]
Pf3D7_07_v3	1189295	1189324	Pf3D7_07_v3-1188696-1189546__var-3	29	+	[ID=PF3D7_0727900;description=conserved Plasmodium protein, unknown function;]
Pf3D7_07_v3	1189696	1190146	Pf3D7_07_v3-1189696-1190146__subseq-0	450	+	[ID=PF3D7_0727900;description=conserved Plasmodium protein, unknown function;]
Pf3D7_07_v3	1191409	1191438	Pf3D7_07_v3-1191298-1192048__var-0	29	+	[ID=PF3D7_0728000;description=eukaryotic translation initiation factor 2 subunit alpha;]
Pf3D7_07_v3	1192019	1192048	Pf3D7_07_v3-1191298-1192048__var-1	29	+	[ID=PF3D7_0728000;description=eukaryotic translation initiation factor 2 subunit alpha;]
Pf3D7_07_v3	1193580	1193609	Pf3D7_07_v3-1193571-1193871__var-0	29	+	NA
Pf3D7_07_v3	1193630	1193659	Pf3D7_07_v3-1193571-1193871__var-1	29	+	[ID=PF3D7_0728100;description=conserved Plasmodium membrane protein, unknown function;]
Pf3D7_07_v3	1194742	1194771	Pf3D7_07_v3-1193921-1194921__var-0	29	+	[ID=PF3D7_0728100;description=conserved Plasmodium membrane protein, unknown function;]
Pf3D7_07_v3	1194839	1194872	Pf3D7_07_v3-1193921-1194921__var-1	33	+	[ID=PF3D7_0728100;description=conserved Plasmodium membrane protein, unknown function;]
Pf3D7_07_v3	1195329	1195358	Pf3D7_07_v3-1195083-1195833__var-0	29	+	[ID=PF3D7_0728100;description=conserved Plasmodium membrane protein, unknown function;]
Pf3D7_07_v3	1195576	1195605	Pf3D7_07_v3-1195083-1195833__var-1	29	+	[ID=PF3D7_0728100;description=conserved Plasmodium membrane protein, unknown function;]
Pf3D7_07_v3	1195602	1195631	Pf3D7_07_v3-1195083-1195833__var-2	29	+	[ID=PF3D7_0728100;description=conserved Plasmodium membrane protein, unknown function;]
Pf3D7_07_v3	1195686	1195715	Pf3D7_07_v3-1195083-1195833__var-3	29	+	[ID=PF3D7_0728100;description=conserved Plasmodium membrane protein, unknown function;]
Pf3D7_07_v3	1195738	1195781	Pf3D7_07_v3-1195083-1195833__var-4	43	+	[ID=PF3D7_0728100;description=conserved Plasmodium membrane protein, unknown function;]
Pf3D7_07_v3	1196045	1196074	Pf3D7_07_v3-1196020-1196520__var-0	29	+	[ID=PF3D7_0728100;description=conserved Plasmodium membrane protein, unknown function;]
Pf3D7_07_v3	1196258	1196291	Pf3D7_07_v3-1196020-1196520__var-1	33	+	[ID=PF3D7_0728100;description=conserved Plasmodium membrane protein, unknown function;]
Pf3D7_07_v3	1196291	1196320	Pf3D7_07_v3-1196020-1196520__var-2	29	+	[ID=PF3D7_0728100;description=conserved Plasmodium membrane protein, unknown function;]
Pf3D7_07_v3	1196311	1196340	Pf3D7_07_v3-1196020-1196520__var-3	29	+	[ID=PF3D7_0728100;description=conserved Plasmodium membrane protein, unknown function;]
Pf3D7_07_v3	1196648	1196685	Pf3D7_07_v3-1196622-1197872__var-0	37	+	[ID=PF3D7_0728100;description=conserved Plasmodium membrane protein, unknown function;]
Pf3D7_07_v3	1196688	1196717	Pf3D7_07_v3-1196622-1197872__var-1	29	+	[ID=PF3D7_0728100;description=conserved Plasmodium membrane protein, unknown function;]
Pf3D7_07_v3	1196938	1196967	Pf3D7_07_v3-1196622-1197872__var-2	29	+	[ID=PF3D7_0728100;description=conserved Plasmodium membrane protein, unknown function;]
Pf3D7_07_v3	1197542	1197571	Pf3D7_07_v3-1196622-1197872__var-3	29	+	[ID=PF3D7_0728100;description=conserved Plasmodium membrane protein, unknown function;]
Pf3D7_07_v3	1197754	1197783	Pf3D7_07_v3-1196622-1197872__var-4	29	+	[ID=PF3D7_0728100;description=conserved Plasmodium membrane protein, unknown function;]
Pf3D7_07_v3	1197849	1197872	Pf3D7_07_v3-1196622-1197872__var-5	23	+	[ID=PF3D7_0728100;description=conserved Plasmodium membrane protein, unknown function;]
Pf3D7_07_v3	1198158	1198187	Pf3D7_07_v3-1198039-1198439__var-0	29	+	[ID=PF3D7_0728100;description=conserved Plasmodium membrane protein, unknown function;]
Pf3D7_07_v3	1198234	1198263	Pf3D7_07_v3-1198039-1198439__var-1	29	+	[ID=PF3D7_0728100;description=conserved Plasmodium membrane protein, unknown function;]
Pf3D7_07_v3	1198581	1198610	Pf3D7_07_v3-1198512-1199112__var-0	29	+	[ID=PF3D7_0728100;description=conserved Plasmodium membrane protein, unknown function;]
Pf3D7_07_v3	1198642	1198671	Pf3D7_07_v3-1198512-1199112__var-1	29	+	[ID=PF3D7_0728100;description=conserved Plasmodium membrane protein, unknown function;]
Pf3D7_07_v3	1198780	1198809	Pf3D7_07_v3-1198512-1199112__var-2	29	+	[ID=PF3D7_0728100;description=conserved Plasmodium membrane protein, unknown function;]
Pf3D7_07_v3	1198808	1198837	Pf3D7_07_v3-1198512-1199112__var-3	29	+	[ID=PF3D7_0728100;description=conserved Plasmodium membrane protein, unknown function;]
Pf3D7_07_v3	1198878	1198907	Pf3D7_07_v3-1198512-1199112__var-4	29	+	[ID=PF3D7_0728100;description=conserved Plasmodium membrane protein, unknown function;]
Pf3D7_07_v3	1198988	1199017	Pf3D7_07_v3-1198512-1199112__var-5	29	+	[ID=PF3D7_0728100;description=conserved Plasmodium membrane protein, unknown function;]
Pf3D7_07_v3	1199380	1199409	Pf3D7_07_v3-1199195-1199695__var-0	29	+	[ID=PF3D7_0728100;description=conserved Plasmodium membrane protein, unknown function;]
Pf3D7_07_v3	1199519	1199548	Pf3D7_07_v3-1199195-1199695__var-1	29	+	[ID=PF3D7_0728100;description=conserved Plasmodium membrane protein, unknown function;]
Pf3D7_07_v3	1199768	1199797	Pf3D7_07_v3-1199745-1201245__var-00	29	+	[ID=PF3D7_0728100;description=conserved Plasmodium membrane protein, unknown function;]
Pf3D7_07_v3	1199823	1199852	Pf3D7_07_v3-1199745-1201245__var-01	29	+	[ID=PF3D7_0728100;description=conserved Plasmodium membrane protein, unknown function;]
Pf3D7_07_v3	1200004	1200033	Pf3D7_07_v3-1199745-1201245__var-02	29	+	[ID=PF3D7_0728100;description=conserved Plasmodium membrane protein, unknown function;]
Pf3D7_07_v3	1200298	1200439	Pf3D7_07_v3-1199745-1201245__var-03	141	+	[ID=PF3D7_0728100;description=conserved Plasmodium membrane protein, unknown function;]
Pf3D7_07_v3	1200474	1200503	Pf3D7_07_v3-1199745-1201245__var-04	29	+	[ID=PF3D7_0728100;description=conserved Plasmodium membrane protein, unknown function;]
Pf3D7_07_v3	1200560	1200589	Pf3D7_07_v3-1199745-1201245__var-05	29	+	[ID=PF3D7_0728100;description=conserved Plasmodium membrane protein, unknown function;]
Pf3D7_07_v3	1200577	1200610	Pf3D7_07_v3-1199745-1201245__var-06	33	+	[ID=PF3D7_0728100;description=conserved Plasmodium membrane protein, unknown function;]
Pf3D7_07_v3	1200911	1200940	Pf3D7_07_v3-1199745-1201245__var-07	29	+	[ID=PF3D7_0728100;description=conserved Plasmodium membrane protein, unknown function;]
Pf3D7_07_v3	1200986	1201015	Pf3D7_07_v3-1199745-1201245__var-08	29	+	[ID=PF3D7_0728100;description=conserved Plasmodium membrane protein, unknown function;]
Pf3D7_07_v3	1201172	1201201	Pf3D7_07_v3-1199745-1201245__var-09	29	+	[ID=PF3D7_0728100;description=conserved Plasmodium membrane protein, unknown function;]
Pf3D7_07_v3	1201196	1201225	Pf3D7_07_v3-1199745-1201245__var-10	29	+	[ID=PF3D7_0728100;description=conserved Plasmodium membrane protein, unknown function;]
Pf3D7_07_v3	1201451	1201480	Pf3D7_07_v3-1201423-1202023__var-0	29	+	[ID=PF3D7_0728100;description=conserved Plasmodium membrane protein, unknown function;]
Pf3D7_07_v3	1201484	1201513	Pf3D7_07_v3-1201423-1202023__var-1	29	+	[ID=PF3D7_0728100;description=conserved Plasmodium membrane protein, unknown function;]
Pf3D7_07_v3	1201672	1201703	Pf3D7_07_v3-1201423-1202023__var-2	31	+	[ID=PF3D7_0728100;description=conserved Plasmodium membrane protein, unknown function;]
Pf3D7_07_v3	1201779	1201808	Pf3D7_07_v3-1201423-1202023__var-3	29	+	[ID=PF3D7_0728100;description=conserved Plasmodium membrane protein, unknown function;]
Pf3D7_07_v3	1202305	1202334	Pf3D7_07_v3-1202209-1202659__var-0	29	+	[ID=PF3D7_0728100;description=conserved Plasmodium membrane protein, unknown function;]
Pf3D7_07_v3	1202324	1202353	Pf3D7_07_v3-1202209-1202659__var-1	29	+	[ID=PF3D7_0728100;description=conserved Plasmodium membrane protein, unknown function;]
Pf3D7_07_v3	1202380	1202567	Pf3D7_07_v3-1202209-1202659__var-2	187	+	[ID=PF3D7_0728100;description=conserved Plasmodium membrane protein, unknown function;]
Pf3D7_07_v3	1202589	1202618	Pf3D7_07_v3-1202209-1202659__var-3	29	+	[ID=PF3D7_0728100;description=conserved Plasmodium membrane protein, unknown function;]
Pf3D7_07_v3	1202616	1202645	Pf3D7_07_v3-1202209-1202659__var-4	29	+	[ID=PF3D7_0728100;description=conserved Plasmodium membrane protein, unknown function;]
Pf3D7_07_v3	1202803	1202851	Pf3D7_07_v3-1202803-1203103__var-0	48	+	[ID=PF3D7_0728100;description=conserved Plasmodium membrane protein, unknown function;]
Pf3D7_07_v3	1202873	1202902	Pf3D7_07_v3-1202803-1203103__var-1	29	+	[ID=PF3D7_0728100;description=conserved Plasmodium membrane protein, unknown function;]
Pf3D7_07_v3	1202934	1202965	Pf3D7_07_v3-1202803-1203103__var-2	31	+	[ID=PF3D7_0728100;description=conserved Plasmodium membrane protein, unknown function;]
Pf3D7_07_v3	1202977	1203011	Pf3D7_07_v3-1202803-1203103__var-3	34	+	[ID=PF3D7_0728100;description=conserved Plasmodium membrane protein, unknown function;]
Pf3D7_07_v3	1203484	1203513	Pf3D7_07_v3-1203451-1203901__var-0	29	+	[ID=PF3D7_0728100;description=conserved Plasmodium membrane protein, unknown function;]
Pf3D7_07_v3	1203581	1203610	Pf3D7_07_v3-1203451-1203901__var-1	29	+	[ID=PF3D7_0728100;description=conserved Plasmodium membrane protein, unknown function;]
Pf3D7_07_v3	1203611	1203640	Pf3D7_07_v3-1203451-1203901__var-2	29	+	[ID=PF3D7_0728100;description=conserved Plasmodium membrane protein, unknown function;]
Pf3D7_07_v3	1203792	1203821	Pf3D7_07_v3-1203451-1203901__var-3	29	+	[ID=PF3D7_0728100;description=conserved Plasmodium membrane protein, unknown function;]
Pf3D7_07_v3	1204032	1204073	Pf3D7_07_v3-1203998-1204248__var-0	41	+	[ID=PF3D7_0728100;description=conserved Plasmodium membrane protein, unknown function;]
Pf3D7_07_v3	1204599	1204628	Pf3D7_07_v3-1204537-1205287__var-0	29	+	[ID=PF3D7_0728100;description=conserved Plasmodium membrane protein, unknown function;]
Pf3D7_07_v3	1204698	1204727	Pf3D7_07_v3-1204537-1205287__var-1	29	+	[ID=PF3D7_0728100;description=conserved Plasmodium membrane protein, unknown function;]
Pf3D7_07_v3	1204856	1204885	Pf3D7_07_v3-1204537-1205287__var-2	29	+	[ID=PF3D7_0728100;description=conserved Plasmodium membrane protein, unknown function;]
Pf3D7_07_v3	1204935	1204964	Pf3D7_07_v3-1204537-1205287__var-3	29	+	[ID=PF3D7_0728100;description=conserved Plasmodium membrane protein, unknown function;]
Pf3D7_07_v3	1205232	1205261	Pf3D7_07_v3-1204537-1205287__var-4	29	+	[ID=PF3D7_0728100;description=conserved Plasmodium membrane protein, unknown function;]
Pf3D7_07_v3	1205256	1205285	Pf3D7_07_v3-1204537-1205287__var-5	29	+	[ID=PF3D7_0728100;description=conserved Plasmodium membrane protein, unknown function;]
Pf3D7_07_v3	1205446	1205468	Pf3D7_07_v3-1205446-1206696__var-00	22	+	[ID=PF3D7_0728100;description=conserved Plasmodium membrane protein, unknown function;]
Pf3D7_07_v3	1205457	1205486	Pf3D7_07_v3-1205446-1206696__var-01	29	+	[ID=PF3D7_0728100;description=conserved Plasmodium membrane protein, unknown function;]
Pf3D7_07_v3	1205526	1205563	Pf3D7_07_v3-1205446-1206696__var-02	37	+	[ID=PF3D7_0728100;description=conserved Plasmodium membrane protein, unknown function;]
Pf3D7_07_v3	1205628	1205657	Pf3D7_07_v3-1205446-1206696__var-03	29	+	[ID=PF3D7_0728100;description=conserved Plasmodium membrane protein, unknown function;]
Pf3D7_07_v3	1205667	1205705	Pf3D7_07_v3-1205446-1206696__var-04	38	+	[ID=PF3D7_0728100;description=conserved Plasmodium membrane protein, unknown function;]
Pf3D7_07_v3	1205769	1205798	Pf3D7_07_v3-1205446-1206696__var-05	29	+	[ID=PF3D7_0728100;description=conserved Plasmodium membrane protein, unknown function;]
Pf3D7_07_v3	1205849	1205882	Pf3D7_07_v3-1205446-1206696__var-06	33	+	[ID=PF3D7_0728100;description=conserved Plasmodium membrane protein, unknown function;]
Pf3D7_07_v3	1205946	1205975	Pf3D7_07_v3-1205446-1206696__var-07	29	+	[ID=PF3D7_0728100;description=conserved Plasmodium membrane protein, unknown function;]
Pf3D7_07_v3	1206054	1206086	Pf3D7_07_v3-1205446-1206696__var-08	32	+	[ID=PF3D7_0728100;description=conserved Plasmodium membrane protein, unknown function;]
Pf3D7_07_v3	1206075	1206104	Pf3D7_07_v3-1205446-1206696__var-09	29	+	[ID=PF3D7_0728100;description=conserved Plasmodium membrane protein, unknown function;]
Pf3D7_07_v3	1206171	1206209	Pf3D7_07_v3-1205446-1206696__var-10	38	+	[ID=PF3D7_0728100;description=conserved Plasmodium membrane protein, unknown function;]
Pf3D7_07_v3	1206246	1206299	Pf3D7_07_v3-1205446-1206696__var-11	53	+	[ID=PF3D7_0728100;description=conserved Plasmodium membrane protein, unknown function;]
Pf3D7_07_v3	1206314	1206343	Pf3D7_07_v3-1205446-1206696__var-12	29	+	[ID=PF3D7_0728100;description=conserved Plasmodium membrane protein, unknown function;]
Pf3D7_07_v3	1206364	1206393	Pf3D7_07_v3-1205446-1206696__var-13	29	+	[ID=PF3D7_0728100;description=conserved Plasmodium membrane protein, unknown function;]
Pf3D7_07_v3	1206519	1206548	Pf3D7_07_v3-1205446-1206696__var-14	29	+	[ID=PF3D7_0728100;description=conserved Plasmodium membrane protein, unknown function;]
Pf3D7_07_v3	1207291	1207351	Pf3D7_07_v3-1206901-1207351__var-0	60	+	[ID=PF3D7_0728100;description=conserved Plasmodium membrane protein, unknown function;]
Pf3D7_07_v3	1207577	1207606	Pf3D7_07_v3-1207455-1208005__var-0	29	+	[ID=PF3D7_0728100;description=conserved Plasmodium membrane protein, unknown function;]
Pf3D7_07_v3	1207596	1207625	Pf3D7_07_v3-1207455-1208005__var-1	29	+	[ID=PF3D7_0728100;description=conserved Plasmodium membrane protein, unknown function;]
Pf3D7_07_v3	1207641	1207670	Pf3D7_07_v3-1207455-1208005__var-2	29	+	[ID=PF3D7_0728100;description=conserved Plasmodium membrane protein, unknown function;]
Pf3D7_07_v3	1207811	1207840	Pf3D7_07_v3-1207455-1208005__var-3	29	+	[ID=PF3D7_0728100;description=conserved Plasmodium membrane protein, unknown function;]
Pf3D7_07_v3	1208165	1208206	Pf3D7_07_v3-1208121-1209171__var-00	41	+	[ID=PF3D7_0728100;description=conserved Plasmodium membrane protein, unknown function;]
Pf3D7_07_v3	1208291	1208326	Pf3D7_07_v3-1208121-1209171__var-01	35	+	[ID=PF3D7_0728100;description=conserved Plasmodium membrane protein, unknown function;]
Pf3D7_07_v3	1208519	1208554	Pf3D7_07_v3-1208121-1209171__var-02	35	+	[ID=PF3D7_0728100;description=conserved Plasmodium membrane protein, unknown function;]
Pf3D7_07_v3	1208658	1208693	Pf3D7_07_v3-1208121-1209171__var-03	35	+	[ID=PF3D7_0728100;description=conserved Plasmodium membrane protein, unknown function;]
Pf3D7_07_v3	1208733	1208768	Pf3D7_07_v3-1208121-1209171__var-04	35	+	[ID=PF3D7_0728100;description=conserved Plasmodium membrane protein, unknown function;]
Pf3D7_07_v3	1208766	1208813	Pf3D7_07_v3-1208121-1209171__var-05	47	+	[ID=PF3D7_0728100;description=conserved Plasmodium membrane protein, unknown function;]
Pf3D7_07_v3	1208900	1208935	Pf3D7_07_v3-1208121-1209171__var-06	35	+	[ID=PF3D7_0728100;description=conserved Plasmodium membrane protein, unknown function;]
Pf3D7_07_v3	1208993	1209028	Pf3D7_07_v3-1208121-1209171__var-07	35	+	[ID=PF3D7_0728100;description=conserved Plasmodium membrane protein, unknown function;]
Pf3D7_07_v3	1209071	1209106	Pf3D7_07_v3-1208121-1209171__var-08	35	+	[ID=PF3D7_0728100;description=conserved Plasmodium membrane protein, unknown function;]
Pf3D7_07_v3	1209123	1209158	Pf3D7_07_v3-1208121-1209171__var-09	35	+	[ID=PF3D7_0728100;description=conserved Plasmodium membrane protein, unknown function;]
Pf3D7_07_v3	1209263	1209302	Pf3D7_07_v3-1209263-1209513__var-0	39	+	[ID=PF3D7_0728100;description=conserved Plasmodium membrane protein, unknown function;]
Pf3D7_07_v3	1209291	1209332	Pf3D7_07_v3-1209263-1209513__var-1	41	+	[ID=PF3D7_0728100;description=conserved Plasmodium membrane protein, unknown function;]
Pf3D7_07_v3	1209326	1209367	Pf3D7_07_v3-1209263-1209513__var-2	41	+	[ID=PF3D7_0728100;description=conserved Plasmodium membrane protein, unknown function;]
Pf3D7_07_v3	1209747	1209776	Pf3D7_07_v3-1209662-1210312__var-0	29	+	[ID=PF3D7_0728100;description=conserved Plasmodium membrane protein, unknown function;]
Pf3D7_07_v3	1209807	1209836	Pf3D7_07_v3-1209662-1210312__var-1	29	+	[ID=PF3D7_0728100;description=conserved Plasmodium membrane protein, unknown function;]
Pf3D7_07_v3	1209955	1209984	Pf3D7_07_v3-1209662-1210312__var-2	29	+	[ID=PF3D7_0728100;description=conserved Plasmodium membrane protein, unknown function;]
Pf3D7_07_v3	1209982	1210011	Pf3D7_07_v3-1209662-1210312__var-3	29	+	[ID=PF3D7_0728100;description=conserved Plasmodium membrane protein, unknown function;]
Pf3D7_07_v3	1210060	1210095	Pf3D7_07_v3-1209662-1210312__var-4	35	+	[ID=PF3D7_0728100;description=conserved Plasmodium membrane protein, unknown function;]
Pf3D7_07_v3	1210172	1210201	Pf3D7_07_v3-1209662-1210312__var-5	29	+	[ID=PF3D7_0728100;description=conserved Plasmodium membrane protein, unknown function;]
Pf3D7_07_v3	1210224	1210253	Pf3D7_07_v3-1209662-1210312__var-6	29	+	[ID=PF3D7_0728100;description=conserved Plasmodium membrane protein, unknown function;]
Pf3D7_07_v3	1210274	1210303	Pf3D7_07_v3-1209662-1210312__var-7	29	+	[ID=PF3D7_0728100;description=conserved Plasmodium membrane protein, unknown function;]
Pf3D7_07_v3	1210290	1210312	Pf3D7_07_v3-1209662-1210312__var-8	22	+	[ID=PF3D7_0728100;description=conserved Plasmodium membrane protein, unknown function;]
Pf3D7_07_v3	1211597	1211626	Pf3D7_07_v3-1211486-1211686__var-0	29	+	NA
Pf3D7_07_v3	1211616	1211645	Pf3D7_07_v3-1211486-1211686__var-1	29	+	NA
Pf3D7_07_v3	1211669	1211686	Pf3D7_07_v3-1211486-1211686__var-2	17	+	[ID=PF3D7_0728200;description=actin-like protein, putative;]
Pf3D7_07_v3	1211954	1211983	Pf3D7_07_v3-1211935-1212735__var-0	29	+	[ID=PF3D7_0728200;description=actin-like protein, putative;]
Pf3D7_07_v3	1212040	1212069	Pf3D7_07_v3-1211935-1212735__var-1	29	+	[ID=PF3D7_0728200;description=actin-like protein, putative;]
Pf3D7_07_v3	1212196	1212225	Pf3D7_07_v3-1211935-1212735__var-2	29	+	[ID=PF3D7_0728200;description=actin-like protein, putative;]
Pf3D7_07_v3	1212226	1212255	Pf3D7_07_v3-1211935-1212735__var-3	29	+	[ID=PF3D7_0728200;description=actin-like protein, putative;]
Pf3D7_07_v3	1212605	1212634	Pf3D7_07_v3-1211935-1212735__var-4	29	+	[ID=PF3D7_0728200;description=actin-like protein, putative;]
Pf3D7_07_v3	1213047	1213076	Pf3D7_07_v3-1212956-1213556__var-0	29	+	[ID=PF3D7_0728200;description=actin-like protein, putative;]
Pf3D7_07_v3	1213316	1213345	Pf3D7_07_v3-1212956-1213556__var-1	29	+	[ID=PF3D7_0728200;description=actin-like protein, putative;]
Pf3D7_07_v3	1213429	1213458	Pf3D7_07_v3-1212956-1213556__var-2	29	+	[ID=PF3D7_0728200;description=actin-like protein, putative;]
Pf3D7_07_v3	1213471	1213500	Pf3D7_07_v3-1212956-1213556__var-3	29	+	[ID=PF3D7_0728200;description=actin-like protein, putative;]
Pf3D7_07_v3	1214378	1214410	Pf3D7_07_v3-1213919-1214469__var-0	32	+	[ID=PF3D7_0728300;description=conserved protein, unknown function;]
Pf3D7_07_v3	1215563	1215592	Pf3D7_07_v3-1215496-1215746__var-0	29	+	[ID=PF3D7_0728400;description=conserved Plasmodium protein, unknown function, unspecified product;]
Pf3D7_07_v3	1215646	1215675	Pf3D7_07_v3-1215496-1215746__var-1	29	+	[ID=PF3D7_0728400;description=conserved Plasmodium protein, unknown function, unspecified product;]
Pf3D7_07_v3	1215673	1215702	Pf3D7_07_v3-1215496-1215746__var-2	29	+	[ID=PF3D7_0728400;description=conserved Plasmodium protein, unknown function, unspecified product;]
Pf3D7_07_v3	1215949	1215978	Pf3D7_07_v3-1215928-1216128__var-0	29	+	NA
Pf3D7_07_v3	1216016	1216049	Pf3D7_07_v3-1215928-1216128__var-1	33	+	NA
Pf3D7_07_v3	1216067	1216106	Pf3D7_07_v3-1215928-1216128__var-2	39	+	[ID=PF3D7_0728500;description=conserved Plasmodium protein, unknown function;]
Pf3D7_07_v3	1216621	1216650	Pf3D7_07_v3-1216566-1216766__var-0	29	+	[ID=PF3D7_0728500;description=conserved Plasmodium protein, unknown function;]
Pf3D7_07_v3	1216663	1216692	Pf3D7_07_v3-1216566-1216766__var-1	29	+	[ID=PF3D7_0728500;description=conserved Plasmodium protein, unknown function;]
Pf3D7_07_v3	1216690	1216720	Pf3D7_07_v3-1216566-1216766__var-2	30	+	[ID=PF3D7_0728500;description=conserved Plasmodium protein, unknown function;]
Pf3D7_07_v3	1217800	1217889	Pf3D7_07_v3-1217749-1217949__var-0	89	+	NA
Pf3D7_07_v3	1218702	1218731	Pf3D7_07_v3-1218406-1219006__var-0	29	+	[ID=PF3D7_0728600;description=RING zinc finger protein, putative;]
Pf3D7_07_v3	1218755	1218784	Pf3D7_07_v3-1218406-1219006__var-1	29	+	[ID=PF3D7_0728600;description=RING zinc finger protein, putative;]
Pf3D7_07_v3	1218794	1218823	Pf3D7_07_v3-1218406-1219006__var-2	29	+	[ID=PF3D7_0728600;description=RING zinc finger protein, putative;]
Pf3D7_07_v3	1218908	1218937	Pf3D7_07_v3-1218406-1219006__var-3	29	+	[ID=PF3D7_0728600;description=RING zinc finger protein, putative;]
Pf3D7_07_v3	1220072	1220103	Pf3D7_07_v3-1219336-1221086__var-0	31	+	[ID=PF3D7_0728600;description=RING zinc finger protein, putative;]
Pf3D7_07_v3	1220304	1220335	Pf3D7_07_v3-1219336-1221086__var-1	31	+	[ID=PF3D7_0728600;description=RING zinc finger protein, putative;]
Pf3D7_07_v3	1220334	1220365	Pf3D7_07_v3-1219336-1221086__var-2	31	+	[ID=PF3D7_0728600;description=RING zinc finger protein, putative;]
Pf3D7_07_v3	1220716	1220747	Pf3D7_07_v3-1219336-1221086__var-3	31	+	[ID=PF3D7_0728600;description=RING zinc finger protein, putative;]
Pf3D7_07_v3	1220859	1220890	Pf3D7_07_v3-1219336-1221086__var-4	31	+	[ID=PF3D7_0728600;description=RING zinc finger protein, putative;]
Pf3D7_07_v3	1220881	1220912	Pf3D7_07_v3-1219336-1221086__var-5	31	+	[ID=PF3D7_0728600;description=RING zinc finger protein, putative;]
Pf3D7_07_v3	1220937	1220968	Pf3D7_07_v3-1219336-1221086__var-6	31	+	[ID=PF3D7_0728600;description=RING zinc finger protein, putative;]
Pf3D7_07_v3	1221228	1221257	Pf3D7_07_v3-1221213-1221613__var-0	29	+	[ID=PF3D7_0728600;description=RING zinc finger protein, putative;]
Pf3D7_07_v3	1221253	1221293	Pf3D7_07_v3-1221213-1221613__var-1	40	+	[ID=PF3D7_0728600;description=RING zinc finger protein, putative;]
Pf3D7_07_v3	1221347	1221387	Pf3D7_07_v3-1221213-1221613__var-2	40	+	[ID=PF3D7_0728600;description=RING zinc finger protein, putative;]
Pf3D7_07_v3	1221402	1221431	Pf3D7_07_v3-1221213-1221613__var-3	29	+	[ID=PF3D7_0728600;description=RING zinc finger protein, putative;]
Pf3D7_07_v3	1221422	1221451	Pf3D7_07_v3-1221213-1221613__var-4	29	+	[ID=PF3D7_0728600;description=RING zinc finger protein, putative;]
Pf3D7_07_v3	1221767	1221796	Pf3D7_07_v3-1221679-1222679__var-0	29	+	[ID=PF3D7_0728600;description=RING zinc finger protein, putative;]
Pf3D7_07_v3	1221917	1221956	Pf3D7_07_v3-1221679-1222679__var-1	39	+	[ID=PF3D7_0728600;description=RING zinc finger protein, putative;]
Pf3D7_07_v3	1222165	1222194	Pf3D7_07_v3-1221679-1222679__var-2	29	+	[ID=PF3D7_0728600;description=RING zinc finger protein, putative;]
Pf3D7_07_v3	1223230	1223261	Pf3D7_07_v3-1223157-1223357__var-0	31	+	[ID=PF3D7_0728600;description=RING zinc finger protein, putative;]
Pf3D7_07_v3	1223685	1223722	Pf3D7_07_v3-1223450-1224200__var-0	37	+	[ID=PF3D7_0728600;description=RING zinc finger protein, putative;]
Pf3D7_07_v3	1223898	1223941	Pf3D7_07_v3-1223450-1224200__var-1	43	+	[ID=PF3D7_0728600;description=RING zinc finger protein, putative;]
Pf3D7_07_v3	1224334	1224452	Pf3D7_07_v3-1224334-1224634__var-0	118	+	[ID=PF3D7_0728600;description=RING zinc finger protein, putative;]
Pf3D7_07_v3	1224456	1224614	Pf3D7_07_v3-1224334-1224634__var-1	158	+	[ID=PF3D7_0728600;description=RING zinc finger protein, putative;]
Pf3D7_07_v3	1224564	1224634	Pf3D7_07_v3-1224334-1224634__var-2	70	+	[ID=PF3D7_0728600;description=RING zinc finger protein, putative;]
Pf3D7_07_v3	1224821	1224850	Pf3D7_07_v3-1224787-1225137__var-0	29	+	[ID=PF3D7_0728600;description=RING zinc finger protein, putative;]
Pf3D7_07_v3	1225037	1225066	Pf3D7_07_v3-1224787-1225137__var-1	29	+	[ID=PF3D7_0728600;description=RING zinc finger protein, putative;]
Pf3D7_07_v3	1226010	1226042	Pf3D7_07_v3-1226010-1226560__var-0	32	+	[ID=PF3D7_0728700;description=alpha/beta hydrolase, putative;]
Pf3D7_07_v3	1226114	1226171	Pf3D7_07_v3-1226010-1226560__var-1	57	+	[ID=PF3D7_0728700;description=alpha/beta hydrolase, putative;]
Pf3D7_07_v3	1226213	1226276	Pf3D7_07_v3-1226010-1226560__var-2	63	+	[ID=PF3D7_0728700;description=alpha/beta hydrolase, putative;]
Pf3D7_07_v3	1226251	1226304	Pf3D7_07_v3-1226010-1226560__var-3	53	+	[ID=PF3D7_0728700;description=alpha/beta hydrolase, putative;]
Pf3D7_07_v3	1226317	1226395	Pf3D7_07_v3-1226010-1226560__var-4	78	+	[ID=PF3D7_0728700;description=alpha/beta hydrolase, putative;]
Pf3D7_07_v3	1226386	1226439	Pf3D7_07_v3-1226010-1226560__var-5	53	+	[ID=PF3D7_0728700;description=alpha/beta hydrolase, putative;]
Pf3D7_07_v3	1226857	1226886	Pf3D7_07_v3-1226632-1227432__var-0	29	+	[ID=PF3D7_0728700;description=alpha/beta hydrolase, putative;]
Pf3D7_07_v3	1227234	1227263	Pf3D7_07_v3-1226632-1227432__var-1	29	+	[ID=PF3D7_0728700;description=alpha/beta hydrolase, putative;]
Pf3D7_07_v3	1227250	1227279	Pf3D7_07_v3-1226632-1227432__var-2	29	+	[ID=PF3D7_0728700;description=alpha/beta hydrolase, putative;]
Pf3D7_07_v3	1227367	1227396	Pf3D7_07_v3-1226632-1227432__var-3	29	+	[ID=PF3D7_0728700;description=alpha/beta hydrolase, putative;]
Pf3D7_07_v3	1228143	1228172	Pf3D7_07_v3-1227624-1228474__var-0	29	+	[ID=PF3D7_0728700;description=alpha/beta hydrolase, putative;]
Pf3D7_07_v3	1228364	1228395	Pf3D7_07_v3-1227624-1228474__var-1	31	+	[ID=PF3D7_0728700;description=alpha/beta hydrolase, putative;]
Pf3D7_07_v3	1228443	1228472	Pf3D7_07_v3-1227624-1228474__var-2	29	+	[ID=PF3D7_0728700;description=alpha/beta hydrolase, putative;]
Pf3D7_07_v3	1230830	1230859	Pf3D7_07_v3-1230775-1230975__var-0	29	+	[ID=PF3D7_0728800;description=conserved Plasmodium protein, unknown function;]
Pf3D7_07_v3	1231259	1231288	Pf3D7_07_v3-1231213-1231913__var-0	29	+	[ID=PF3D7_0728800;description=conserved Plasmodium protein, unknown function;]
Pf3D7_07_v3	1231307	1231344	Pf3D7_07_v3-1231213-1231913__var-1	37	+	[ID=PF3D7_0728800;description=conserved Plasmodium protein, unknown function;]
Pf3D7_07_v3	1231674	1231703	Pf3D7_07_v3-1231213-1231913__var-2	29	+	[ID=PF3D7_0728800;description=conserved Plasmodium protein, unknown function;]
Pf3D7_07_v3	1231734	1231763	Pf3D7_07_v3-1231213-1231913__var-3	29	+	[ID=PF3D7_0728800;description=conserved Plasmodium protein, unknown function;]
Pf3D7_07_v3	1232817	1232846	Pf3D7_07_v3-1232756-1233056__var-0	29	+	[ID=PF3D7_0728900;description=RNA-binding protein, putative;]
Pf3D7_07_v3	1232889	1232918	Pf3D7_07_v3-1232756-1233056__var-1	29	+	[ID=PF3D7_0728900;description=RNA-binding protein, putative;]
Pf3D7_07_v3	1233003	1233032	Pf3D7_07_v3-1232756-1233056__var-2	29	+	[ID=PF3D7_0728900;description=RNA-binding protein, putative;]
Pf3D7_07_v3	1233128	1233163	Pf3D7_07_v3-1233128-1233328__var-0	35	+	[ID=PF3D7_0728900;description=RNA-binding protein, putative;]
Pf3D7_07_v3	1233202	1233231	Pf3D7_07_v3-1233128-1233328__var-1	29	+	[ID=PF3D7_0728900;description=RNA-binding protein, putative;]
Pf3D7_07_v3	1233224	1233253	Pf3D7_07_v3-1233128-1233328__var-2	29	+	[ID=PF3D7_0728900;description=RNA-binding protein, putative;]
Pf3D7_07_v3	1233781	1233812	Pf3D7_07_v3-1233769-1234719__var-00	31	+	[ID=PF3D7_0728900;description=RNA-binding protein, putative;]
Pf3D7_07_v3	1233814	1233845	Pf3D7_07_v3-1233769-1234719__var-01	31	+	[ID=PF3D7_0728900;description=RNA-binding protein, putative;]
Pf3D7_07_v3	1234012	1234043	Pf3D7_07_v3-1233769-1234719__var-02	31	+	[ID=PF3D7_0728900;description=RNA-binding protein, putative;]
Pf3D7_07_v3	1234135	1234166	Pf3D7_07_v3-1233769-1234719__var-03	31	+	[ID=PF3D7_0728900;description=RNA-binding protein, putative;]
Pf3D7_07_v3	1234182	1234228	Pf3D7_07_v3-1233769-1234719__var-04	46	+	[ID=PF3D7_0728900;description=RNA-binding protein, putative;]
Pf3D7_07_v3	1234249	1234280	Pf3D7_07_v3-1233769-1234719__var-05	31	+	[ID=PF3D7_0728900;description=RNA-binding protein, putative;]
Pf3D7_07_v3	1234313	1234352	Pf3D7_07_v3-1233769-1234719__var-06	39	+	[ID=PF3D7_0728900;description=RNA-binding protein, putative;]
Pf3D7_07_v3	1234458	1234489	Pf3D7_07_v3-1233769-1234719__var-07	31	+	[ID=PF3D7_0728900;description=RNA-binding protein, putative;]
Pf3D7_07_v3	1234495	1234526	Pf3D7_07_v3-1233769-1234719__var-08	31	+	[ID=PF3D7_0728900;description=RNA-binding protein, putative;]
Pf3D7_07_v3	1234583	1234614	Pf3D7_07_v3-1233769-1234719__var-09	31	+	[ID=PF3D7_0728900;description=RNA-binding protein, putative;]
Pf3D7_07_v3	1237402	1237431	Pf3D7_07_v3-1237333-1237533__var-0	29	+	NA
Pf3D7_07_v3	1237438	1237467	Pf3D7_07_v3-1237333-1237533__var-1	29	+	NA
Pf3D7_07_v3	1237476	1237505	Pf3D7_07_v3-1237333-1237533__var-2	29	+	NA
Pf3D7_07_v3	1237494	1237533	Pf3D7_07_v3-1237333-1237533__var-3	39	+	NA
Pf3D7_07_v3	1238546	1238575	Pf3D7_07_v3-1238454-1238654__var-0	29	+	[ID=PF3D7_0729100;description=conserved Plasmodium protein, unknown function;]
Pf3D7_07_v3	1238575	1238604	Pf3D7_07_v3-1238454-1238654__var-1	29	+	[ID=PF3D7_0729100;description=conserved Plasmodium protein, unknown function;]
Pf3D7_07_v3	1238595	1238654	Pf3D7_07_v3-1238454-1238654__var-2	59	+	[ID=PF3D7_0729100;description=conserved Plasmodium protein, unknown function;]
Pf3D7_07_v3	1238751	1238782	Pf3D7_07_v3-1238704-1239254__var-0	31	+	[ID=PF3D7_0729100;description=conserved Plasmodium protein, unknown function;]
Pf3D7_07_v3	1238779	1238821	Pf3D7_07_v3-1238704-1239254__var-1	42	+	[ID=PF3D7_0729100;description=conserved Plasmodium protein, unknown function;]
Pf3D7_07_v3	1238865	1238896	Pf3D7_07_v3-1238704-1239254__var-2	31	+	[ID=PF3D7_0729100;description=conserved Plasmodium protein, unknown function;]
Pf3D7_07_v3	1238982	1239027	Pf3D7_07_v3-1238704-1239254__var-3	45	+	[ID=PF3D7_0729100;description=conserved Plasmodium protein, unknown function;]
Pf3D7_07_v3	1239027	1239068	Pf3D7_07_v3-1238704-1239254__var-4	41	+	[ID=PF3D7_0729100;description=conserved Plasmodium protein, unknown function;]
Pf3D7_07_v3	1239571	1239608	Pf3D7_07_v3-1239498-1242048__var-00	37	+	[ID=PF3D7_0729100;description=conserved Plasmodium protein, unknown function;]
Pf3D7_07_v3	1239726	1239763	Pf3D7_07_v3-1239498-1242048__var-01	37	+	[ID=PF3D7_0729100;description=conserved Plasmodium protein, unknown function;]
Pf3D7_07_v3	1239925	1239962	Pf3D7_07_v3-1239498-1242048__var-02	37	+	[ID=PF3D7_0729100;description=conserved Plasmodium protein, unknown function;]
Pf3D7_07_v3	1240164	1240201	Pf3D7_07_v3-1239498-1242048__var-03	37	+	[ID=PF3D7_0729100;description=conserved Plasmodium protein, unknown function;]
Pf3D7_07_v3	1240335	1240372	Pf3D7_07_v3-1239498-1242048__var-04	37	+	[ID=PF3D7_0729100;description=conserved Plasmodium protein, unknown function;]
Pf3D7_07_v3	1240406	1240443	Pf3D7_07_v3-1239498-1242048__var-05	37	+	[ID=PF3D7_0729100;description=conserved Plasmodium protein, unknown function;]
Pf3D7_07_v3	1240448	1240485	Pf3D7_07_v3-1239498-1242048__var-06	37	+	[ID=PF3D7_0729100;description=conserved Plasmodium protein, unknown function;]
Pf3D7_07_v3	1240862	1240899	Pf3D7_07_v3-1239498-1242048__var-07	37	+	[ID=PF3D7_0729100;description=conserved Plasmodium protein, unknown function;]
Pf3D7_07_v3	1240919	1240956	Pf3D7_07_v3-1239498-1242048__var-08	37	+	[ID=PF3D7_0729100;description=conserved Plasmodium protein, unknown function;]
Pf3D7_07_v3	1241386	1241433	Pf3D7_07_v3-1239498-1242048__var-09	47	+	[ID=PF3D7_0729100;description=conserved Plasmodium protein, unknown function;]
Pf3D7_07_v3	1241546	1241583	Pf3D7_07_v3-1239498-1242048__var-10	37	+	[ID=PF3D7_0729100;description=conserved Plasmodium protein, unknown function;]
Pf3D7_07_v3	1241710	1241747	Pf3D7_07_v3-1239498-1242048__var-11	37	+	[ID=PF3D7_0729100;description=conserved Plasmodium protein, unknown function;]
Pf3D7_07_v3	1241834	1241871	Pf3D7_07_v3-1239498-1242048__var-12	37	+	[ID=PF3D7_0729100;description=conserved Plasmodium protein, unknown function;]
Pf3D7_07_v3	1241990	1242027	Pf3D7_07_v3-1239498-1242048__var-13	37	+	[ID=PF3D7_0729100;description=conserved Plasmodium protein, unknown function;]
Pf3D7_07_v3	1242013	1242048	Pf3D7_07_v3-1239498-1242048__var-14	35	+	[ID=PF3D7_0729100;description=conserved Plasmodium protein, unknown function;]
Pf3D7_07_v3	1242567	1242596	Pf3D7_07_v3-1242394-1242694__var-0	29	+	[ID=PF3D7_0729100;description=conserved Plasmodium protein, unknown function;]
Pf3D7_07_v3	1242983	1243016	Pf3D7_07_v3-1242983-1243283__var-0	33	+	[ID=PF3D7_0729100;description=conserved Plasmodium protein, unknown function;]
Pf3D7_07_v3	1243063	1243092	Pf3D7_07_v3-1242983-1243283__var-1	29	+	[ID=PF3D7_0729100;description=conserved Plasmodium protein, unknown function;]
Pf3D7_07_v3	1243152	1243196	Pf3D7_07_v3-1242983-1243283__var-2	44	+	[ID=PF3D7_0729100;description=conserved Plasmodium protein, unknown function;]
Pf3D7_07_v3	1243751	1243780	Pf3D7_07_v3-1243520-1244070__var-0	29	+	[ID=PF3D7_0729100;description=conserved Plasmodium protein, unknown function;]
Pf3D7_07_v3	1243911	1243940	Pf3D7_07_v3-1243520-1244070__var-1	29	+	[ID=PF3D7_0729100;description=conserved Plasmodium protein, unknown function;]
Pf3D7_07_v3	1244469	1244498	Pf3D7_07_v3-1244200-1244650__var-0	29	+	[ID=PF3D7_0729100;description=conserved Plasmodium protein, unknown function;]
Pf3D7_07_v3	1244622	1244650	Pf3D7_07_v3-1244200-1244650__var-1	28	+	[ID=PF3D7_0729100;description=conserved Plasmodium protein, unknown function;]
Pf3D7_07_v3	1244750	1244782	Pf3D7_07_v3-1244750-1246200__var-00	32	+	[ID=PF3D7_0729100;description=conserved Plasmodium protein, unknown function;]
Pf3D7_07_v3	1245140	1245185	Pf3D7_07_v3-1244750-1246200__var-01	45	+	[ID=PF3D7_0729100;description=conserved Plasmodium protein, unknown function;]
Pf3D7_07_v3	1245277	1245310	Pf3D7_07_v3-1244750-1246200__var-02	33	+	[ID=PF3D7_0729100;description=conserved Plasmodium protein, unknown function;]
Pf3D7_07_v3	1245328	1245361	Pf3D7_07_v3-1244750-1246200__var-03	33	+	[ID=PF3D7_0729100;description=conserved Plasmodium protein, unknown function;]
Pf3D7_07_v3	1245403	1245436	Pf3D7_07_v3-1244750-1246200__var-04	33	+	[ID=PF3D7_0729100;description=conserved Plasmodium protein, unknown function;]
Pf3D7_07_v3	1245584	1245617	Pf3D7_07_v3-1244750-1246200__var-05	33	+	[ID=PF3D7_0729100;description=conserved Plasmodium protein, unknown function;]
Pf3D7_07_v3	1245729	1245762	Pf3D7_07_v3-1244750-1246200__var-06	33	+	[ID=PF3D7_0729100;description=conserved Plasmodium protein, unknown function;]
Pf3D7_07_v3	1245812	1245845	Pf3D7_07_v3-1244750-1246200__var-07	33	+	[ID=PF3D7_0729100;description=conserved Plasmodium protein, unknown function;]
Pf3D7_07_v3	1245937	1245970	Pf3D7_07_v3-1244750-1246200__var-08	33	+	[ID=PF3D7_0729100;description=conserved Plasmodium protein, unknown function;]
Pf3D7_07_v3	1245961	1245994	Pf3D7_07_v3-1244750-1246200__var-09	33	+	[ID=PF3D7_0729100;description=conserved Plasmodium protein, unknown function;]
Pf3D7_07_v3	1246183	1246200	Pf3D7_07_v3-1244750-1246200__var-10	17	+	[ID=PF3D7_0729100;description=conserved Plasmodium protein, unknown function;]
Pf3D7_07_v3	1246551	1246580	Pf3D7_07_v3-1246533-1246983__var-0	29	+	NA
Pf3D7_07_v3	1246780	1246809	Pf3D7_07_v3-1246533-1246983__var-1	29	+	NA
Pf3D7_07_v3	1246841	1246870	Pf3D7_07_v3-1246533-1246983__var-2	29	+	NA
Pf3D7_07_v3	1246874	1246903	Pf3D7_07_v3-1246533-1246983__var-3	29	+	NA
Pf3D7_07_v3	1247371	1247416	Pf3D7_07_v3-1247371-1247621__var-0	45	+	[ID=PF3D7_0729200;description=1-cys peroxiredoxin;]
Pf3D7_07_v3	1247577	1247606	Pf3D7_07_v3-1247371-1247621__var-1	29	+	[ID=PF3D7_0729200;description=1-cys peroxiredoxin;]
Pf3D7_07_v3	1247779	1247808	Pf3D7_07_v3-1247770-1248220__var-0	29	+	[ID=PF3D7_0729200;description=1-cys peroxiredoxin;]
Pf3D7_07_v3	1247826	1247855	Pf3D7_07_v3-1247770-1248220__var-1	29	+	[ID=PF3D7_0729200;description=1-cys peroxiredoxin;]
Pf3D7_07_v3	1248004	1248033	Pf3D7_07_v3-1247770-1248220__var-2	29	+	[ID=PF3D7_0729200;description=1-cys peroxiredoxin;]
Pf3D7_07_v3	1248025	1248054	Pf3D7_07_v3-1247770-1248220__var-3	29	+	[ID=PF3D7_0729200;description=1-cys peroxiredoxin;]
Pf3D7_07_v3	1248138	1248167	Pf3D7_07_v3-1247770-1248220__var-4	29	+	[ID=PF3D7_0729200;description=1-cys peroxiredoxin;]
Pf3D7_07_v3	1248930	1248959	Pf3D7_07_v3-1248826-1249476__var-0	29	+	[ID=PF3D7_0729300;description=60S ribosomal export protein NMD3, putative;]
Pf3D7_07_v3	1249059	1249088	Pf3D7_07_v3-1248826-1249476__var-1	29	+	[ID=PF3D7_0729300;description=60S ribosomal export protein NMD3, putative;]
Pf3D7_07_v3	1249248	1249277	Pf3D7_07_v3-1248826-1249476__var-2	29	+	[ID=PF3D7_0729300;description=60S ribosomal export protein NMD3, putative;]
Pf3D7_07_v3	1249407	1249447	Pf3D7_07_v3-1248826-1249476__var-3	40	+	[ID=PF3D7_0729300;description=60S ribosomal export protein NMD3, putative;]
Pf3D7_07_v3	1249535	1249564	Pf3D7_07_v3-1249526-1251476__var-00	29	+	[ID=PF3D7_0729300;description=60S ribosomal export protein NMD3, putative;]
Pf3D7_07_v3	1249552	1249581	Pf3D7_07_v3-1249526-1251476__var-01	29	+	[ID=PF3D7_0729300;description=60S ribosomal export protein NMD3, putative;]
Pf3D7_07_v3	1249626	1249655	Pf3D7_07_v3-1249526-1251476__var-02	29	+	[ID=PF3D7_0729300;description=60S ribosomal export protein NMD3, putative;]
Pf3D7_07_v3	1249785	1249814	Pf3D7_07_v3-1249526-1251476__var-03	29	+	[ID=PF3D7_0729300;description=60S ribosomal export protein NMD3, putative;]
Pf3D7_07_v3	1249806	1249835	Pf3D7_07_v3-1249526-1251476__var-04	29	+	[ID=PF3D7_0729300;description=60S ribosomal export protein NMD3, putative;]
Pf3D7_07_v3	1250352	1250381	Pf3D7_07_v3-1249526-1251476__var-05	29	+	[ID=PF3D7_0729300;description=60S ribosomal export protein NMD3, putative;]
Pf3D7_07_v3	1250565	1250594	Pf3D7_07_v3-1249526-1251476__var-06	29	+	[ID=PF3D7_0729300;description=60S ribosomal export protein NMD3, putative;]
Pf3D7_07_v3	1250619	1250648	Pf3D7_07_v3-1249526-1251476__var-07	29	+	[ID=PF3D7_0729300;description=60S ribosomal export protein NMD3, putative;]
Pf3D7_07_v3	1250757	1250786	Pf3D7_07_v3-1249526-1251476__var-08	29	+	[ID=PF3D7_0729300;description=60S ribosomal export protein NMD3, putative;]
Pf3D7_07_v3	1250811	1250854	Pf3D7_07_v3-1249526-1251476__var-09	43	+	[ID=PF3D7_0729300;description=60S ribosomal export protein NMD3, putative;]
Pf3D7_07_v3	1250924	1250953	Pf3D7_07_v3-1249526-1251476__var-10	29	+	[ID=PF3D7_0729300;description=60S ribosomal export protein NMD3, putative;]
Pf3D7_07_v3	1251130	1251159	Pf3D7_07_v3-1249526-1251476__var-11	29	+	[ID=PF3D7_0729300;description=60S ribosomal export protein NMD3, putative;]
Pf3D7_07_v3	1251200	1251229	Pf3D7_07_v3-1249526-1251476__var-12	29	+	[ID=PF3D7_0729300;description=60S ribosomal export protein NMD3, putative;]
Pf3D7_07_v3	1251233	1251262	Pf3D7_07_v3-1249526-1251476__var-13	29	+	[ID=PF3D7_0729300;description=60S ribosomal export protein NMD3, putative;]
Pf3D7_07_v3	1251421	1251455	Pf3D7_07_v3-1249526-1251476__var-14	34	+	[ID=PF3D7_0729300;description=60S ribosomal export protein NMD3, putative;]
Pf3D7_07_v3	1252452	1252478	Pf3D7_07_v3-1252452-1252752__var-0	26	+	NA
Pf3D7_07_v3	1252477	1252506	Pf3D7_07_v3-1252452-1252752__var-1	29	+	NA
Pf3D7_07_v3	1252502	1252543	Pf3D7_07_v3-1252452-1252752__var-2	41	+	NA
Pf3D7_07_v3	1252568	1252610	Pf3D7_07_v3-1252452-1252752__var-3	42	+	NA
Pf3D7_07_v3	1252648	1252696	Pf3D7_07_v3-1252452-1252752__var-4	48	+	NA
Pf3D7_07_v3	1253960	1253991	Pf3D7_07_v3-1253264-1254064__var-0	31	+	[ID=PF3D7_0729400;description=ribosome biogenesis protein BRX1, putative;]
Pf3D7_07_v3	1255657	1255686	Pf3D7_07_v3-1255391-1256341__var-0	29	+	[ID=PF3D7_0729500;description=mRNA (N6-adenosine)-methyltransferase, putative;]
Pf3D7_07_v3	1255684	1255723	Pf3D7_07_v3-1255391-1256341__var-1	39	+	[ID=PF3D7_0729500;description=mRNA (N6-adenosine)-methyltransferase, putative;]
Pf3D7_07_v3	1255743	1255772	Pf3D7_07_v3-1255391-1256341__var-2	29	+	[ID=PF3D7_0729500;description=mRNA (N6-adenosine)-methyltransferase, putative;]
Pf3D7_07_v3	1255810	1255839	Pf3D7_07_v3-1255391-1256341__var-3	29	+	[ID=PF3D7_0729500;description=mRNA (N6-adenosine)-methyltransferase, putative;]
Pf3D7_07_v3	1255831	1255860	Pf3D7_07_v3-1255391-1256341__var-4	29	+	[ID=PF3D7_0729500;description=mRNA (N6-adenosine)-methyltransferase, putative;]
Pf3D7_07_v3	1255957	1255986	Pf3D7_07_v3-1255391-1256341__var-5	29	+	[ID=PF3D7_0729500;description=mRNA (N6-adenosine)-methyltransferase, putative;]
Pf3D7_07_v3	1256273	1256315	Pf3D7_07_v3-1255391-1256341__var-6	42	+	[ID=PF3D7_0729500;description=mRNA (N6-adenosine)-methyltransferase, putative;]
Pf3D7_07_v3	1256310	1256341	Pf3D7_07_v3-1255391-1256341__var-7	31	+	[ID=PF3D7_0729500;description=mRNA (N6-adenosine)-methyltransferase, putative;]
Pf3D7_07_v3	1256492	1256521	Pf3D7_07_v3-1256476-1257626__var-0	29	+	[ID=PF3D7_0729500;description=mRNA (N6-adenosine)-methyltransferase, putative;]
Pf3D7_07_v3	1256636	1256668	Pf3D7_07_v3-1256476-1257626__var-1	32	+	[ID=PF3D7_0729500;description=mRNA (N6-adenosine)-methyltransferase, putative;]
Pf3D7_07_v3	1256975	1257004	Pf3D7_07_v3-1256476-1257626__var-2	29	+	[ID=PF3D7_0729500;description=mRNA (N6-adenosine)-methyltransferase, putative;]
Pf3D7_07_v3	1257014	1257043	Pf3D7_07_v3-1256476-1257626__var-3	29	+	[ID=PF3D7_0729500;description=mRNA (N6-adenosine)-methyltransferase, putative;]
Pf3D7_07_v3	1257281	1257310	Pf3D7_07_v3-1256476-1257626__var-4	29	+	[ID=PF3D7_0729500;description=mRNA (N6-adenosine)-methyltransferase, putative;]
Pf3D7_07_v3	1257566	1257595	Pf3D7_07_v3-1256476-1257626__var-5	29	+	[ID=PF3D7_0729500;description=mRNA (N6-adenosine)-methyltransferase, putative;]
Pf3D7_07_v3	1258314	1258343	Pf3D7_07_v3-1258213-1258413__var-0	29	+	NA
Pf3D7_07_v3	1258513	1258595	Pf3D7_07_v3-1258513-1258963__var-0	82	+	NA
Pf3D7_07_v3	1258665	1258754	Pf3D7_07_v3-1258513-1258963__var-1	89	+	NA
Pf3D7_07_v3	1258729	1258963	Pf3D7_07_v3-1258513-1258963__var-2	234	+	[ID=PF3D7_0729600;description=conserved Plasmodium protein, unknown function;]
Pf3D7_07_v3	1260520	1260549	Pf3D7_07_v3-1260172-1261272__var-0	29	+	[ID=PF3D7_0729700;description=conserved protein, unknown function;]
Pf3D7_07_v3	1260561	1260590	Pf3D7_07_v3-1260172-1261272__var-1	29	+	[ID=PF3D7_0729700;description=conserved protein, unknown function;]
Pf3D7_07_v3	1260586	1260615	Pf3D7_07_v3-1260172-1261272__var-2	29	+	[ID=PF3D7_0729700;description=conserved protein, unknown function;]
Pf3D7_07_v3	1260713	1260742	Pf3D7_07_v3-1260172-1261272__var-3	29	+	[ID=PF3D7_0729700;description=conserved protein, unknown function;]
Pf3D7_07_v3	1261227	1261256	Pf3D7_07_v3-1260172-1261272__var-4	29	+	[ID=PF3D7_0729700;description=conserved protein, unknown function;]
Pf3D7_07_v3	1261494	1261523	Pf3D7_07_v3-1261457-1262757__var-0	29	+	[ID=PF3D7_0729700;description=conserved protein, unknown function;]
Pf3D7_07_v3	1261523	1261558	Pf3D7_07_v3-1261457-1262757__var-1	35	+	[ID=PF3D7_0729700;description=conserved protein, unknown function;]
Pf3D7_07_v3	1261583	1261612	Pf3D7_07_v3-1261457-1262757__var-2	29	+	[ID=PF3D7_0729700;description=conserved protein, unknown function;]
Pf3D7_07_v3	1261782	1261812	Pf3D7_07_v3-1261457-1262757__var-3	30	+	[ID=PF3D7_0729700;description=conserved protein, unknown function;]
Pf3D7_07_v3	1262352	1262381	Pf3D7_07_v3-1261457-1262757__var-4	29	+	[ID=PF3D7_0729700;description=conserved protein, unknown function;]
Pf3D7_07_v3	1262375	1262418	Pf3D7_07_v3-1261457-1262757__var-5	43	+	[ID=PF3D7_0729700;description=conserved protein, unknown function;]
Pf3D7_07_v3	1262528	1262576	Pf3D7_07_v3-1261457-1262757__var-6	48	+	[ID=PF3D7_0729700;description=conserved protein, unknown function;]
Pf3D7_07_v3	1262643	1262672	Pf3D7_07_v3-1261457-1262757__var-7	29	+	[ID=PF3D7_0729700;description=conserved protein, unknown function;]
Pf3D7_07_v3	1262922	1262951	Pf3D7_07_v3-1262852-1263102__var-0	29	+	NA
Pf3D7_07_v3	1263026	1263055	Pf3D7_07_v3-1262852-1263102__var-1	29	+	NA
Pf3D7_07_v3	1263232	1263582	Pf3D7_07_v3-1263232-1263582__subseq-0	350	+	NA
Pf3D7_07_v3	1263908	1263936	Pf3D7_07_v3-1263908-1264108__var-0	28	+	NA
Pf3D7_07_v3	1263961	1263990	Pf3D7_07_v3-1263908-1264108__var-1	29	+	NA
Pf3D7_07_v3	1264013	1264042	Pf3D7_07_v3-1263908-1264108__var-2	29	+	NA
Pf3D7_07_v3	1264627	1264656	Pf3D7_07_v3-1264465-1264715__var-0	29	+	[ID=PF3D7_0729800;description=dynein light chain, putative;]
Pf3D7_07_v3	1278855	1278884	Pf3D7_07_v3-1278709-1280509__var-0	29	+	[ID=PF3D7_0729900;description=dynein heavy chain, putative;]
Pf3D7_07_v3	1279118	1279147	Pf3D7_07_v3-1278709-1280509__var-1	29	+	[ID=PF3D7_0729900;description=dynein heavy chain, putative;]
Pf3D7_07_v3	1279518	1279547	Pf3D7_07_v3-1278709-1280509__var-2	29	+	[ID=PF3D7_0729900;description=dynein heavy chain, putative;]
Pf3D7_07_v3	1279556	1279585	Pf3D7_07_v3-1278709-1280509__var-3	29	+	[ID=PF3D7_0729900;description=dynein heavy chain, putative;]
Pf3D7_07_v3	1279972	1280001	Pf3D7_07_v3-1278709-1280509__var-4	29	+	[ID=PF3D7_0729900;description=dynein heavy chain, putative;]
Pf3D7_07_v3	1280088	1280117	Pf3D7_07_v3-1278709-1280509__var-5	29	+	[ID=PF3D7_0729900;description=dynein heavy chain, putative;]
Pf3D7_07_v3	1280162	1280191	Pf3D7_07_v3-1278709-1280509__var-6	29	+	[ID=PF3D7_0729900;description=dynein heavy chain, putative;]
Pf3D7_07_v3	1280395	1280424	Pf3D7_07_v3-1278709-1280509__var-7	29	+	[ID=PF3D7_0729900;description=dynein heavy chain, putative;]
Pf3D7_07_v3	1280559	1280859	Pf3D7_07_v3-1280559-1280859__subseq-0	300	+	[ID=PF3D7_0729900;description=dynein heavy chain, putative;]
Pf3D7_07_v3	1281065	1281315	Pf3D7_07_v3-1281065-1281315__subseq-0	250	+	[ID=PF3D7_0729900;description=dynein heavy chain, putative;]
Pf3D7_07_v3	1281971	1282099	Pf3D7_07_v3-1281801-1282301__var-0	128	+	[ID=PF3D7_0730000;description=conserved protein, unknown function;]
Pf3D7_07_v3	1282052	1282151	Pf3D7_07_v3-1281801-1282301__var-1	99	+	[ID=PF3D7_0730000;description=conserved protein, unknown function;]
Pf3D7_07_v3	1282965	1283027	Pf3D7_07_v3-1282838-1285488__var-00	62	+	[ID=PF3D7_0730100;description=tRNA pseudouridine synthase D, putative;]
Pf3D7_07_v3	1283126	1283173	Pf3D7_07_v3-1282838-1285488__var-01	47	+	[ID=PF3D7_0730100;description=tRNA pseudouridine synthase D, putative;]
Pf3D7_07_v3	1283199	1283246	Pf3D7_07_v3-1282838-1285488__var-02	47	+	[ID=PF3D7_0730100;description=tRNA pseudouridine synthase D, putative;]
Pf3D7_07_v3	1283419	1283466	Pf3D7_07_v3-1282838-1285488__var-03	47	+	[ID=PF3D7_0730100;description=tRNA pseudouridine synthase D, putative;]
Pf3D7_07_v3	1283870	1283917	Pf3D7_07_v3-1282838-1285488__var-04	47	+	[ID=PF3D7_0730100;description=tRNA pseudouridine synthase D, putative;]
Pf3D7_07_v3	1283969	1284016	Pf3D7_07_v3-1282838-1285488__var-05	47	+	[ID=PF3D7_0730100;description=tRNA pseudouridine synthase D, putative;]
Pf3D7_07_v3	1284010	1284057	Pf3D7_07_v3-1282838-1285488__var-06	47	+	[ID=PF3D7_0730100;description=tRNA pseudouridine synthase D, putative;]
Pf3D7_07_v3	1284127	1284186	Pf3D7_07_v3-1282838-1285488__var-07	59	+	[ID=PF3D7_0730100;description=tRNA pseudouridine synthase D, putative;]
Pf3D7_07_v3	1284178	1284225	Pf3D7_07_v3-1282838-1285488__var-08	47	+	[ID=PF3D7_0730100;description=tRNA pseudouridine synthase D, putative;]
Pf3D7_07_v3	1284341	1284388	Pf3D7_07_v3-1282838-1285488__var-09	47	+	[ID=PF3D7_0730100;description=tRNA pseudouridine synthase D, putative;]
Pf3D7_07_v3	1284428	1284475	Pf3D7_07_v3-1282838-1285488__var-10	47	+	[ID=PF3D7_0730100;description=tRNA pseudouridine synthase D, putative;]
Pf3D7_07_v3	1284660	1284707	Pf3D7_07_v3-1282838-1285488__var-11	47	+	[ID=PF3D7_0730100;description=tRNA pseudouridine synthase D, putative;]
Pf3D7_07_v3	1284810	1284857	Pf3D7_07_v3-1282838-1285488__var-12	47	+	[ID=PF3D7_0730100;description=tRNA pseudouridine synthase D, putative;]
Pf3D7_07_v3	1284879	1284926	Pf3D7_07_v3-1282838-1285488__var-13	47	+	[ID=PF3D7_0730100;description=tRNA pseudouridine synthase D, putative;]
Pf3D7_07_v3	1285040	1285087	Pf3D7_07_v3-1282838-1285488__var-14	47	+	[ID=PF3D7_0730100;description=tRNA pseudouridine synthase D, putative;]
Pf3D7_07_v3	1285224	1285271	Pf3D7_07_v3-1282838-1285488__var-15	47	+	[ID=PF3D7_0730100;description=tRNA pseudouridine synthase D, putative;]
Pf3D7_07_v3	1285332	1285379	Pf3D7_07_v3-1282838-1285488__var-16	47	+	[ID=PF3D7_0730100;description=tRNA pseudouridine synthase D, putative;]
Pf3D7_07_v3	1286347	1286376	Pf3D7_07_v3-1286027-1286527__var-0	29	+	[ID=PF3D7_0730200;description=AP-4 complex subunit beta, putative;]
Pf3D7_07_v3	1286746	1286775	Pf3D7_07_v3-1286730-1287580__var-0	29	+	[ID=PF3D7_0730200;description=AP-4 complex subunit beta, putative;]
Pf3D7_07_v3	1286785	1286814	Pf3D7_07_v3-1286730-1287580__var-1	29	+	[ID=PF3D7_0730200;description=AP-4 complex subunit beta, putative;]
Pf3D7_07_v3	1287483	1287512	Pf3D7_07_v3-1286730-1287580__var-2	29	+	[ID=PF3D7_0730200;description=AP-4 complex subunit beta, putative;]
Pf3D7_07_v3	1287515	1287544	Pf3D7_07_v3-1286730-1287580__var-3	29	+	[ID=PF3D7_0730200;description=AP-4 complex subunit beta, putative;]
Pf3D7_07_v3	1288149	1288178	Pf3D7_07_v3-1287994-1288794__var-0	29	+	[ID=PF3D7_0730200;description=AP-4 complex subunit beta, putative;]
Pf3D7_07_v3	1288331	1288360	Pf3D7_07_v3-1287994-1288794__var-1	29	+	[ID=PF3D7_0730200;description=AP-4 complex subunit beta, putative;]
Pf3D7_07_v3	1288757	1288786	Pf3D7_07_v3-1287994-1288794__var-2	29	+	[ID=PF3D7_0730200;description=AP-4 complex subunit beta, putative;]
Pf3D7_07_v3	1288970	1289170	Pf3D7_07_v3-1288970-1289170__subseq-0	200	+	[ID=PF3D7_0730200;description=AP-4 complex subunit beta, putative;]
Pf3D7_07_v3	1289343	1289374	Pf3D7_07_v3-1289228-1289428__var-0	31	+	[ID=PF3D7_0730200;description=AP-4 complex subunit beta, putative;]
Pf3D7_07_v3	1291053	1291082	Pf3D7_07_v3-1290967-1291217__var-0	29	+	NA
Pf3D7_07_v3	1291084	1291113	Pf3D7_07_v3-1290967-1291217__var-1	29	+	NA
Pf3D7_07_v3	1291139	1291168	Pf3D7_07_v3-1290967-1291217__var-2	29	+	NA
Pf3D7_07_v3	1291297	1291547	Pf3D7_07_v3-1291297-1291547__subseq-0	250	+	NA
Pf3D7_07_v3	1292202	1292269	Pf3D7_07_v3-1292167-1292367__var-0	67	+	NA
Pf3D7_07_v3	1292244	1292337	Pf3D7_07_v3-1292167-1292367__var-1	93	+	NA
Pf3D7_07_v3	1292564	1292764	Pf3D7_07_v3-1292564-1292764__subseq-0	200	+	NA
Pf3D7_07_v3	1293231	1293260	Pf3D7_07_v3-1293147-1293397__var-0	29	+	NA
Pf3D7_07_v3	1293853	1293882	Pf3D7_07_v3-1293660-1293910__var-0	29	+	NA
Pf3D7_07_v3	1294255	1294299	Pf3D7_07_v3-1294175-1294475__var-0	44	+	NA
Pf3D7_07_v3	1294352	1294381	Pf3D7_07_v3-1294175-1294475__var-1	29	+	NA
Pf3D7_07_v3	1294379	1294408	Pf3D7_07_v3-1294175-1294475__var-2	29	+	NA
Pf3D7_07_v3	1295643	1295672	Pf3D7_07_v3-1295636-1295836__var-0	29	+	NA
Pf3D7_07_v3	1295662	1295691	Pf3D7_07_v3-1295636-1295836__var-1	29	+	NA
Pf3D7_07_v3	1295709	1295738	Pf3D7_07_v3-1295636-1295836__var-2	29	+	NA
Pf3D7_07_v3	1295728	1295757	Pf3D7_07_v3-1295636-1295836__var-3	29	+	NA
Pf3D7_07_v3	1297419	1297442	Pf3D7_07_v3-1297419-1298019__var-0	23	+	NA
Pf3D7_07_v3	1297450	1297482	Pf3D7_07_v3-1297419-1298019__var-1	32	+	[ID=PF3D7_0730300;description=AP2 domain transcription factor AP2-L, putative;]
Pf3D7_07_v3	1297614	1297643	Pf3D7_07_v3-1297419-1298019__var-2	29	+	[ID=PF3D7_0730300;description=AP2 domain transcription factor AP2-L, putative;]
Pf3D7_07_v3	1297720	1297756	Pf3D7_07_v3-1297419-1298019__var-3	36	+	[ID=PF3D7_0730300;description=AP2 domain transcription factor AP2-L, putative;]
Pf3D7_07_v3	1297746	1297780	Pf3D7_07_v3-1297419-1298019__var-4	34	+	[ID=PF3D7_0730300;description=AP2 domain transcription factor AP2-L, putative;]
Pf3D7_07_v3	1297808	1297837	Pf3D7_07_v3-1297419-1298019__var-5	29	+	[ID=PF3D7_0730300;description=AP2 domain transcription factor AP2-L, putative;]
Pf3D7_07_v3	1297827	1297856	Pf3D7_07_v3-1297419-1298019__var-6	29	+	[ID=PF3D7_0730300;description=AP2 domain transcription factor AP2-L, putative;]
Pf3D7_07_v3	1297860	1297889	Pf3D7_07_v3-1297419-1298019__var-7	29	+	[ID=PF3D7_0730300;description=AP2 domain transcription factor AP2-L, putative;]
Pf3D7_07_v3	1297888	1297917	Pf3D7_07_v3-1297419-1298019__var-8	29	+	[ID=PF3D7_0730300;description=AP2 domain transcription factor AP2-L, putative;]
Pf3D7_07_v3	1298301	1298342	Pf3D7_07_v3-1298144-1299244__var-00	41	+	[ID=PF3D7_0730300;description=AP2 domain transcription factor AP2-L, putative;]
Pf3D7_07_v3	1298337	1298384	Pf3D7_07_v3-1298144-1299244__var-01	47	+	[ID=PF3D7_0730300;description=AP2 domain transcription factor AP2-L, putative;]
Pf3D7_07_v3	1298392	1298433	Pf3D7_07_v3-1298144-1299244__var-02	41	+	[ID=PF3D7_0730300;description=AP2 domain transcription factor AP2-L, putative;]
Pf3D7_07_v3	1298628	1298669	Pf3D7_07_v3-1298144-1299244__var-03	41	+	[ID=PF3D7_0730300;description=AP2 domain transcription factor AP2-L, putative;]
Pf3D7_07_v3	1298704	1298745	Pf3D7_07_v3-1298144-1299244__var-04	41	+	[ID=PF3D7_0730300;description=AP2 domain transcription factor AP2-L, putative;]
Pf3D7_07_v3	1298775	1298816	Pf3D7_07_v3-1298144-1299244__var-05	41	+	[ID=PF3D7_0730300;description=AP2 domain transcription factor AP2-L, putative;]
Pf3D7_07_v3	1298840	1298884	Pf3D7_07_v3-1298144-1299244__var-06	44	+	[ID=PF3D7_0730300;description=AP2 domain transcription factor AP2-L, putative;]
Pf3D7_07_v3	1298878	1298919	Pf3D7_07_v3-1298144-1299244__var-07	41	+	[ID=PF3D7_0730300;description=AP2 domain transcription factor AP2-L, putative;]
Pf3D7_07_v3	1298976	1299026	Pf3D7_07_v3-1298144-1299244__var-08	50	+	[ID=PF3D7_0730300;description=AP2 domain transcription factor AP2-L, putative;]
Pf3D7_07_v3	1299031	1299072	Pf3D7_07_v3-1298144-1299244__var-09	41	+	[ID=PF3D7_0730300;description=AP2 domain transcription factor AP2-L, putative;]
Pf3D7_07_v3	1299065	1299106	Pf3D7_07_v3-1298144-1299244__var-10	41	+	[ID=PF3D7_0730300;description=AP2 domain transcription factor AP2-L, putative;]
Pf3D7_07_v3	1299110	1299161	Pf3D7_07_v3-1298144-1299244__var-11	51	+	[ID=PF3D7_0730300;description=AP2 domain transcription factor AP2-L, putative;]
Pf3D7_07_v3	1299654	1299683	Pf3D7_07_v3-1299579-1300929__var-00	29	+	[ID=PF3D7_0730300;description=AP2 domain transcription factor AP2-L, putative;]
Pf3D7_07_v3	1299707	1299736	Pf3D7_07_v3-1299579-1300929__var-01	29	+	[ID=PF3D7_0730300;description=AP2 domain transcription factor AP2-L, putative;]
Pf3D7_07_v3	1299779	1299808	Pf3D7_07_v3-1299579-1300929__var-02	29	+	[ID=PF3D7_0730300;description=AP2 domain transcription factor AP2-L, putative;]
Pf3D7_07_v3	1299800	1299829	Pf3D7_07_v3-1299579-1300929__var-03	29	+	[ID=PF3D7_0730300;description=AP2 domain transcription factor AP2-L, putative;]
Pf3D7_07_v3	1300119	1300148	Pf3D7_07_v3-1299579-1300929__var-04	29	+	[ID=PF3D7_0730300;description=AP2 domain transcription factor AP2-L, putative;]
Pf3D7_07_v3	1300661	1300690	Pf3D7_07_v3-1299579-1300929__var-05	29	+	[ID=PF3D7_0730300;description=AP2 domain transcription factor AP2-L, putative;]
Pf3D7_07_v3	1300816	1300845	Pf3D7_07_v3-1299579-1300929__var-06	29	+	[ID=PF3D7_0730300;description=AP2 domain transcription factor AP2-L, putative;]
Pf3D7_07_v3	1300833	1300862	Pf3D7_07_v3-1299579-1300929__var-07	29	+	[ID=PF3D7_0730300;description=AP2 domain transcription factor AP2-L, putative;]
Pf3D7_07_v3	1300875	1300919	Pf3D7_07_v3-1299579-1300929__var-08	44	+	[ID=PF3D7_0730300;description=AP2 domain transcription factor AP2-L, putative;]
Pf3D7_07_v3	1300906	1300929	Pf3D7_07_v3-1299579-1300929__var-09	23	+	[ID=PF3D7_0730300;description=AP2 domain transcription factor AP2-L, putative;]
Pf3D7_07_v3	1301343	1301416	Pf3D7_07_v3-1301066-1301416__var-0	73	+	[ID=PF3D7_0730300;description=AP2 domain transcription factor AP2-L, putative;]
Pf3D7_07_v3	1302142	1302262	Pf3D7_07_v3-1302129-1302629__var-0	120	+	NA
Pf3D7_07_v3	1302246	1302329	Pf3D7_07_v3-1302129-1302629__var-1	83	+	NA
Pf3D7_07_v3	1302330	1302468	Pf3D7_07_v3-1302129-1302629__var-2	138	+	NA
Pf3D7_07_v3	1302500	1302583	Pf3D7_07_v3-1302129-1302629__var-3	83	+	NA
Pf3D7_07_v3	1304328	1304528	Pf3D7_07_v3-1304328-1304528__subseq-0	200	+	[ID=PF3D7_0730400;description=IMP1-like protein, putative;]
Pf3D7_07_v3	1305867	1305900	Pf3D7_07_v3-1305864-1307664__var-00	33	+	[ID=PF3D7_0730500;description=conserved Plasmodium protein, unknown function;]
Pf3D7_07_v3	1305975	1306008	Pf3D7_07_v3-1305864-1307664__var-01	33	+	[ID=PF3D7_0730500;description=conserved Plasmodium protein, unknown function;]
Pf3D7_07_v3	1306020	1306053	Pf3D7_07_v3-1305864-1307664__var-02	33	+	[ID=PF3D7_0730500;description=conserved Plasmodium protein, unknown function;]
Pf3D7_07_v3	1306249	1306282	Pf3D7_07_v3-1305864-1307664__var-03	33	+	[ID=PF3D7_0730500;description=conserved Plasmodium protein, unknown function;]
Pf3D7_07_v3	1306294	1306327	Pf3D7_07_v3-1305864-1307664__var-04	33	+	[ID=PF3D7_0730500;description=conserved Plasmodium protein, unknown function;]
Pf3D7_07_v3	1306324	1306357	Pf3D7_07_v3-1305864-1307664__var-05	33	+	[ID=PF3D7_0730500;description=conserved Plasmodium protein, unknown function;]
Pf3D7_07_v3	1306612	1306645	Pf3D7_07_v3-1305864-1307664__var-06	33	+	[ID=PF3D7_0730500;description=conserved Plasmodium protein, unknown function;]
Pf3D7_07_v3	1306753	1306786	Pf3D7_07_v3-1305864-1307664__var-07	33	+	[ID=PF3D7_0730500;description=conserved Plasmodium protein, unknown function;]
Pf3D7_07_v3	1307212	1307245	Pf3D7_07_v3-1305864-1307664__var-08	33	+	[ID=PF3D7_0730500;description=conserved Plasmodium protein, unknown function;]
Pf3D7_07_v3	1307230	1307263	Pf3D7_07_v3-1305864-1307664__var-09	33	+	[ID=PF3D7_0730500;description=conserved Plasmodium protein, unknown function;]
Pf3D7_07_v3	1307442	1307475	Pf3D7_07_v3-1305864-1307664__var-10	33	+	[ID=PF3D7_0730500;description=conserved Plasmodium protein, unknown function;]
Pf3D7_07_v3	1308147	1308192	Pf3D7_07_v3-1307764-1308264__var-0	45	+	[ID=PF3D7_0730500;description=conserved Plasmodium protein, unknown function;]
Pf3D7_07_v3	1308202	1308231	Pf3D7_07_v3-1307764-1308264__var-1	29	+	[ID=PF3D7_0730500;description=conserved Plasmodium protein, unknown function;]
Pf3D7_07_v3	1308530	1308768	Pf3D7_07_v3-1308530-1308980__var-0	238	+	[ID=PF3D7_0730500;description=conserved Plasmodium protein, unknown function;]
Pf3D7_07_v3	1308723	1308879	Pf3D7_07_v3-1308530-1308980__var-1	156	+	[ID=PF3D7_0730500;description=conserved Plasmodium protein, unknown function;]
Pf3D7_07_v3	1308869	1308980	Pf3D7_07_v3-1308530-1308980__var-2	111	+	[ID=PF3D7_0730500;description=conserved Plasmodium protein, unknown function;]
Pf3D7_07_v3	1309624	1309653	Pf3D7_07_v3-1309277-1310477__var-0	29	+	[ID=PF3D7_0730500;description=conserved Plasmodium protein, unknown function;]
Pf3D7_07_v3	1309872	1309901	Pf3D7_07_v3-1309277-1310477__var-1	29	+	[ID=PF3D7_0730500;description=conserved Plasmodium protein, unknown function;]
Pf3D7_07_v3	1310054	1310083	Pf3D7_07_v3-1309277-1310477__var-2	29	+	[ID=PF3D7_0730500;description=conserved Plasmodium protein, unknown function;]
Pf3D7_07_v3	1310184	1310213	Pf3D7_07_v3-1309277-1310477__var-3	29	+	[ID=PF3D7_0730500;description=conserved Plasmodium protein, unknown function;]
Pf3D7_07_v3	1310380	1310409	Pf3D7_07_v3-1309277-1310477__var-4	29	+	[ID=PF3D7_0730500;description=conserved Plasmodium protein, unknown function;]
Pf3D7_07_v3	1310451	1310477	Pf3D7_07_v3-1309277-1310477__var-5	26	+	[ID=PF3D7_0730500;description=conserved Plasmodium protein, unknown function;]
Pf3D7_07_v3	1310672	1310701	Pf3D7_07_v3-1310619-1311519__var-0	29	+	[ID=PF3D7_0730500;description=conserved Plasmodium protein, unknown function;]
Pf3D7_07_v3	1310719	1310748	Pf3D7_07_v3-1310619-1311519__var-1	29	+	[ID=PF3D7_0730500;description=conserved Plasmodium protein, unknown function;]
Pf3D7_07_v3	1310759	1310788	Pf3D7_07_v3-1310619-1311519__var-2	29	+	[ID=PF3D7_0730500;description=conserved Plasmodium protein, unknown function;]
Pf3D7_07_v3	1311162	1311191	Pf3D7_07_v3-1310619-1311519__var-3	29	+	[ID=PF3D7_0730500;description=conserved Plasmodium protein, unknown function;]
Pf3D7_07_v3	1311203	1311232	Pf3D7_07_v3-1310619-1311519__var-4	29	+	[ID=PF3D7_0730500;description=conserved Plasmodium protein, unknown function;]
Pf3D7_07_v3	1311402	1311431	Pf3D7_07_v3-1310619-1311519__var-5	29	+	[ID=PF3D7_0730500;description=conserved Plasmodium protein, unknown function;]
Pf3D7_07_v3	1311734	1311763	Pf3D7_07_v3-1311652-1312202__var-0	29	+	[ID=PF3D7_0730500;description=conserved Plasmodium protein, unknown function;]
Pf3D7_07_v3	1311876	1311905	Pf3D7_07_v3-1311652-1312202__var-1	29	+	[ID=PF3D7_0730500;description=conserved Plasmodium protein, unknown function;]
Pf3D7_07_v3	1311926	1311955	Pf3D7_07_v3-1311652-1312202__var-2	29	+	[ID=PF3D7_0730500;description=conserved Plasmodium protein, unknown function;]
Pf3D7_07_v3	1312013	1312042	Pf3D7_07_v3-1311652-1312202__var-3	29	+	[ID=PF3D7_0730500;description=conserved Plasmodium protein, unknown function;]
Pf3D7_07_v3	1312087	1312117	Pf3D7_07_v3-1311652-1312202__var-4	30	+	[ID=PF3D7_0730500;description=conserved Plasmodium protein, unknown function;]
Pf3D7_07_v3	1312395	1312430	Pf3D7_07_v3-1312340-1312540__var-0	35	+	[ID=PF3D7_0730500;description=conserved Plasmodium protein, unknown function;]
Pf3D7_07_v3	1312456	1312487	Pf3D7_07_v3-1312340-1312540__var-1	31	+	[ID=PF3D7_0730500;description=conserved Plasmodium protein, unknown function;]
Pf3D7_07_v3	1312511	1312540	Pf3D7_07_v3-1312340-1312540__var-2	29	+	[ID=PF3D7_0730500;description=conserved Plasmodium protein, unknown function;]
Pf3D7_07_v3	1312814	1312846	Pf3D7_07_v3-1312806-1313106__var-0	32	+	[ID=PF3D7_0730500;description=conserved Plasmodium protein, unknown function;]
Pf3D7_07_v3	1313006	1313035	Pf3D7_07_v3-1312806-1313106__var-1	29	+	[ID=PF3D7_0730500;description=conserved Plasmodium protein, unknown function;]
Pf3D7_07_v3	1313040	1313069	Pf3D7_07_v3-1312806-1313106__var-2	29	+	[ID=PF3D7_0730500;description=conserved Plasmodium protein, unknown function;]
Pf3D7_07_v3	1313279	1313529	Pf3D7_07_v3-1313279-1313529__subseq-0	250	+	[ID=PF3D7_0730500;description=conserved Plasmodium protein, unknown function;]
Pf3D7_07_v3	1313596	1313625	Pf3D7_07_v3-1313587-1314187__var-0	29	+	[ID=PF3D7_0730500;description=conserved Plasmodium protein, unknown function;]
Pf3D7_07_v3	1313814	1313843	Pf3D7_07_v3-1313587-1314187__var-1	29	+	[ID=PF3D7_0730500;description=conserved Plasmodium protein, unknown function;]
Pf3D7_07_v3	1314005	1314036	Pf3D7_07_v3-1313587-1314187__var-2	31	+	[ID=PF3D7_0730500;description=conserved Plasmodium protein, unknown function;]
Pf3D7_07_v3	1314024	1314055	Pf3D7_07_v3-1313587-1314187__var-3	31	+	[ID=PF3D7_0730500;description=conserved Plasmodium protein, unknown function;]
Pf3D7_07_v3	1314132	1314161	Pf3D7_07_v3-1313587-1314187__var-4	29	+	[ID=PF3D7_0730500;description=conserved Plasmodium protein, unknown function;]
Pf3D7_07_v3	1314157	1314186	Pf3D7_07_v3-1313587-1314187__var-5	29	+	[ID=PF3D7_0730500;description=conserved Plasmodium protein, unknown function;]
Pf3D7_07_v3	1317078	1317107	Pf3D7_07_v3-1317014-1317314__var-0	29	+	NA
Pf3D7_07_v3	1317291	1317314	Pf3D7_07_v3-1317014-1317314__var-1	23	+	NA
Pf3D7_07_v3	1317975	1318009	Pf3D7_07_v3-1317975-1318225__var-0	34	+	NA
Pf3D7_07_v3	1317999	1318034	Pf3D7_07_v3-1317975-1318225__var-1	35	+	NA
Pf3D7_07_v3	1318030	1318070	Pf3D7_07_v3-1317975-1318225__var-2	40	+	[ID=PF3D7_0730600;description=tRNA Valine;]
Pf3D7_07_v3	1318108	1318143	Pf3D7_07_v3-1317975-1318225__var-3	35	+	[ID=PF3D7_0730600;description=tRNA Valine;]
Pf3D7_07_v3	1318165	1318204	Pf3D7_07_v3-1317975-1318225__var-4	39	+	NA
Pf3D7_07_v3	1318645	1318674	Pf3D7_07_v3-1318624-1318824__var-0	29	+	NA
Pf3D7_07_v3	1318782	1318824	Pf3D7_07_v3-1318624-1318824__var-1	42	+	NA
Pf3D7_07_v3	1319508	1319537	Pf3D7_07_v3-1319490-1319740__var-0	29	+	NA
Pf3D7_07_v3	1319626	1319655	Pf3D7_07_v3-1319490-1319740__var-1	29	+	NA
Pf3D7_07_v3	1319678	1319715	Pf3D7_07_v3-1319490-1319740__var-2	37	+	NA
Pf3D7_07_v3	1319916	1319945	Pf3D7_07_v3-1319809-1320009__var-0	29	+	NA
Pf3D7_07_v3	1319976	1320005	Pf3D7_07_v3-1319809-1320009__var-1	29	+	NA
Pf3D7_07_v3	1320125	1320325	Pf3D7_07_v3-1320125-1320325__subseq-0	200	+	NA
Pf3D7_07_v3	1320900	1320929	Pf3D7_07_v3-1320896-1321196__var-0	29	+	NA
Pf3D7_07_v3	1320955	1320984	Pf3D7_07_v3-1320896-1321196__var-1	29	+	NA
Pf3D7_07_v3	1321031	1321060	Pf3D7_07_v3-1320896-1321196__var-2	29	+	NA
Pf3D7_07_v3	1321503	1321532	Pf3D7_07_v3-1321499-1322099__var-0	29	+	[ID=PF3D7_0730800;description=Plasmodium exported protein, unknown function, unspecified product;]
Pf3D7_07_v3	1321537	1321566	Pf3D7_07_v3-1321499-1322099__var-1	29	+	[ID=PF3D7_0730800;description=Plasmodium exported protein, unknown function, unspecified product;]
Pf3D7_07_v3	1321602	1321631	Pf3D7_07_v3-1321499-1322099__var-2	29	+	[ID=PF3D7_0730800;description=Plasmodium exported protein, unknown function, unspecified product;]
Pf3D7_07_v3	1323029	1323058	Pf3D7_07_v3-1322852-1323152__var-0	29	+	NA
Pf3D7_07_v3	1323115	1323144	Pf3D7_07_v3-1322852-1323152__var-1	29	+	NA
Pf3D7_07_v3	1323808	1323837	Pf3D7_07_v3-1323782-1324132__var-0	29	+	NA
Pf3D7_07_v3	1324089	1324118	Pf3D7_07_v3-1323782-1324132__var-1	29	+	NA
Pf3D7_07_v3	1324955	1324984	Pf3D7_07_v3-1324804-1325104__var-0	29	+	NA
Pf3D7_07_v3	1324994	1325023	Pf3D7_07_v3-1324804-1325104__var-1	29	+	NA
Pf3D7_07_v3	1325371	1325571	Pf3D7_07_v3-1325371-1325571__subseq-0	200	+	[ID=PF3D7_0730900;description=EMP1-trafficking protein;]
Pf3D7_07_v3	1325668	1325697	Pf3D7_07_v3-1325621-1326371__var-0	29	+	[ID=PF3D7_0730900;description=EMP1-trafficking protein;]
Pf3D7_07_v3	1325842	1325871	Pf3D7_07_v3-1325621-1326371__var-1	29	+	[ID=PF3D7_0730900;description=EMP1-trafficking protein;]
Pf3D7_07_v3	1326056	1326085	Pf3D7_07_v3-1325621-1326371__var-2	29	+	[ID=PF3D7_0730900;description=EMP1-trafficking protein;]
Pf3D7_07_v3	1326169	1326207	Pf3D7_07_v3-1325621-1326371__var-3	38	+	[ID=PF3D7_0730900;description=EMP1-trafficking protein;]
Pf3D7_07_v3	1328439	1328789	Pf3D7_07_v3-1328439-1328789__subseq-0	350	+	[ID=PF3D7_0730900;description=EMP1-trafficking protein;]
Pf3D7_07_v3	1330576	1330976	Pf3D7_07_v3-1330576-1330976__subseq-0	400	+	[ID=PF3D7_0730900;description=EMP1-trafficking protein;]
Pf3D7_07_v3	1331958	1331987	Pf3D7_07_v3-1331856-1332256__var-0	29	+	NA
Pf3D7_07_v3	1332012	1332041	Pf3D7_07_v3-1331856-1332256__var-1	29	+	NA
Pf3D7_07_v3	1332081	1332115	Pf3D7_07_v3-1331856-1332256__var-2	34	+	NA
Pf3D7_07_v3	1332117	1332146	Pf3D7_07_v3-1331856-1332256__var-3	29	+	NA
Pf3D7_07_v3	1332895	1332924	Pf3D7_07_v3-1332679-1333079__var-0	29	+	NA
Pf3D7_07_v3	1334134	1334163	Pf3D7_07_v3-1334012-1334362__var-0	29	+	[ID=PF3D7_0731000;description=unspecified product;]
Pf3D7_07_v3	1335210	1335234	Pf3D7_07_v3-1335210-1335560__var-0	24	+	NA
Pf3D7_07_v3	1335225	1335254	Pf3D7_07_v3-1335210-1335560__var-1	29	+	NA
Pf3D7_07_v3	1336425	1336454	Pf3D7_07_v3-1336397-1336597__var-0	29	+	NA
Pf3D7_07_v3	1336504	1336533	Pf3D7_07_v3-1336397-1336597__var-1	29	+	NA
Pf3D7_07_v3	1336577	1336597	Pf3D7_07_v3-1336397-1336597__var-2	20	+	NA
Pf3D7_07_v3	1336762	1336815	Pf3D7_07_v3-1336762-1336962__var-0	53	+	NA
Pf3D7_07_v3	1336857	1336896	Pf3D7_07_v3-1336762-1336962__var-1	39	+	NA
Pf3D7_07_v3	1337115	1337145	Pf3D7_07_v3-1337090-1337290__var-0	30	+	NA
Pf3D7_07_v3	1337195	1337224	Pf3D7_07_v3-1337090-1337290__var-1	29	+	NA
Pf3D7_07_v3	1338631	1338660	Pf3D7_07_v3-1338477-1339177__var-0	29	+	NA
Pf3D7_07_v3	1338791	1338820	Pf3D7_07_v3-1338477-1339177__var-1	29	+	NA
Pf3D7_07_v3	1339028	1339057	Pf3D7_07_v3-1338477-1339177__var-2	29	+	[ID=PF3D7_0731100;description=EMP1-trafficking protein;]
Pf3D7_07_v3	1339157	1339177	Pf3D7_07_v3-1338477-1339177__var-3	20	+	[ID=PF3D7_0731100;description=EMP1-trafficking protein;]
Pf3D7_07_v3	1339344	1339373	Pf3D7_07_v3-1339300-1339550__var-0	29	+	[ID=PF3D7_0731100;description=EMP1-trafficking protein;]
Pf3D7_07_v3	1340271	1340300	Pf3D7_07_v3-1340034-1341834__var-00	29	+	[ID=PF3D7_0731100;description=EMP1-trafficking protein;]
Pf3D7_07_v3	1340292	1340326	Pf3D7_07_v3-1340034-1341834__var-01	34	+	[ID=PF3D7_0731100;description=EMP1-trafficking protein;]
Pf3D7_07_v3	1340334	1340363	Pf3D7_07_v3-1340034-1341834__var-02	29	+	[ID=PF3D7_0731100;description=EMP1-trafficking protein;]
Pf3D7_07_v3	1340351	1340380	Pf3D7_07_v3-1340034-1341834__var-03	29	+	[ID=PF3D7_0731100;description=EMP1-trafficking protein;]
Pf3D7_07_v3	1340424	1340453	Pf3D7_07_v3-1340034-1341834__var-04	29	+	[ID=PF3D7_0731100;description=EMP1-trafficking protein;]
Pf3D7_07_v3	1340539	1340568	Pf3D7_07_v3-1340034-1341834__var-05	29	+	[ID=PF3D7_0731100;description=EMP1-trafficking protein;]
Pf3D7_07_v3	1340681	1340710	Pf3D7_07_v3-1340034-1341834__var-06	29	+	[ID=PF3D7_0731100;description=EMP1-trafficking protein;]
Pf3D7_07_v3	1340753	1340782	Pf3D7_07_v3-1340034-1341834__var-07	29	+	[ID=PF3D7_0731100;description=EMP1-trafficking protein;]
Pf3D7_07_v3	1340846	1340875	Pf3D7_07_v3-1340034-1341834__var-08	29	+	[ID=PF3D7_0731100;description=EMP1-trafficking protein;]
Pf3D7_07_v3	1341337	1341366	Pf3D7_07_v3-1340034-1341834__var-09	29	+	[ID=PF3D7_0731100;description=EMP1-trafficking protein;]
Pf3D7_07_v3	1341377	1341406	Pf3D7_07_v3-1340034-1341834__var-10	29	+	[ID=PF3D7_0731100;description=EMP1-trafficking protein;]
Pf3D7_07_v3	1342848	1342877	Pf3D7_07_v3-1342798-1343548__var-0	29	+	[ID=PF3D7_0731200;description=Plasmodium exported protein, unknown function;]
Pf3D7_07_v3	1342956	1342985	Pf3D7_07_v3-1342798-1343548__var-1	29	+	[ID=PF3D7_0731200;description=Plasmodium exported protein, unknown function;]
Pf3D7_07_v3	1344027	1344056	Pf3D7_07_v3-1343967-1344167__var-0	29	+	NA
Pf3D7_07_v3	1345141	1345177	Pf3D7_07_v3-1345077-1345327__var-0	36	+	NA
Pf3D7_07_v3	1345214	1345243	Pf3D7_07_v3-1345077-1345327__var-1	29	+	NA
Pf3D7_07_v3	1345493	1345522	Pf3D7_07_v3-1345430-1345630__var-0	29	+	NA
Pf3D7_07_v3	1345591	1345630	Pf3D7_07_v3-1345430-1345630__var-1	39	+	NA
Pf3D7_07_v3	1345751	1345780	Pf3D7_07_v3-1345700-1345900__var-0	29	+	NA
Pf3D7_07_v3	1346279	1346368	Pf3D7_07_v3-1345998-1346498__var-0	89	+	NA
Pf3D7_07_v3	1346836	1347139	Pf3D7_07_v3-1346836-1347139__subseq-0	303	+	NA
Pf3D7_07_v3	1347442	1347471	Pf3D7_07_v3-1347337-1347737__var-0	29	+	NA
Pf3D7_07_v3	1347963	1347999	Pf3D7_07_v3-1347963-1348463__var-0	36	+	NA
Pf3D7_07_v3	1347986	1348017	Pf3D7_07_v3-1347963-1348463__var-1	31	+	NA
Pf3D7_07_v3	1348199	1348232	Pf3D7_07_v3-1347963-1348463__var-2	33	+	NA
Pf3D7_07_v3	1348258	1348289	Pf3D7_07_v3-1347963-1348463__var-3	31	+	NA
Pf3D7_07_v3	1348288	1348321	Pf3D7_07_v3-1347963-1348463__var-4	33	+	NA
Pf3D7_07_v3	1349709	1349767	Pf3D7_07_v3-1349579-1349767__var-0	58	+	NA
Pf3D7_07_v3	1350066	1350156	Pf3D7_07_v3-1350012-1350156__var-0	90	+	[ID=PF3D7_0731300;description=Plasmodium exported protein (PHISTb), unknown function;]
Pf3D7_07_v3	1350376	1350405	Pf3D7_07_v3-1350281-1351081__var-0	29	+	[ID=PF3D7_0731300;description=Plasmodium exported protein (PHISTb), unknown function;]
Pf3D7_07_v3	1350570	1350599	Pf3D7_07_v3-1350281-1351081__var-1	29	+	[ID=PF3D7_0731300;description=Plasmodium exported protein (PHISTb), unknown function;]
Pf3D7_07_v3	1351332	1351395	Pf3D7_07_v3-1351215-1351395__var-0	63	+	NA
Pf3D7_07_v3	1351451	1351559	Pf3D7_07_v3-1351451-1351600__var-0	108	+	NA
Pf3D7_07_v3	1351563	1351600	Pf3D7_07_v3-1351451-1351600__var-1	37	+	NA
Pf3D7_07_v3	1352557	1352603	Pf3D7_07_v3-1352430-1352603__var-0	46	+	NA
Pf3D7_07_v3	1352916	1352990	Pf3D7_07_v3-1352787-1352990__var-0	74	+	NA
Pf3D7_07_v3	1353511	1353541	Pf3D7_07_v3-1353510-1353619__var-0	30	+	NA
Pf3D7_07_v3	1353554	1353619	Pf3D7_07_v3-1353510-1353619__var-1	65	+	NA
Pf3D7_07_v3	1353758	1353787	Pf3D7_07_v3-1353710-1354360__var-0	29	+	[ID=PF3D7_0731400;description=serine/threonine protein kinase, FIKK family, pseudogene;]
Pf3D7_07_v3	1353821	1353850	Pf3D7_07_v3-1353710-1354360__var-1	29	+	[ID=PF3D7_0731400;description=serine/threonine protein kinase, FIKK family, pseudogene;]
Pf3D7_07_v3	1353854	1353885	Pf3D7_07_v3-1353710-1355296__var-00	31	+	[ID=PF3D7_0731400;description=serine/threonine protein kinase, FIKK family, pseudogene;]
Pf3D7_07_v3	1353992	1354025	Pf3D7_07_v3-1353710-1355296__var-01	33	+	[ID=PF3D7_0731400;description=serine/threonine protein kinase, FIKK family, pseudogene;]
Pf3D7_07_v3	1354096	1354127	Pf3D7_07_v3-1353710-1355296__var-02	31	+	[ID=PF3D7_0731400;description=serine/threonine protein kinase, FIKK family, pseudogene;]
[truncated: 1,702 more rows]
