# Supplementary material for: Interchromosomal segmental duplication drives translocation and loss of P. falciparum histidine-rich protein 3
Source: eLife. 2024 Oct 7;13:RP93534. doi: 10.7554/eLife.93534 (PMC11458181; doi:10.7554/eLife.93534)
Supplement: Supplementary file 4. — This table contains information on the biallelic SNPS from within the non-paralogous windows used for analyzing the regions of interest on chromosomes 5, 7, 8, 11, and 13. These variable regions can be found completely within the windows of Supplementary file 2. Core genome windows and Supplementary file 3. Variations in core genome windows. [file elife-93534-supp4.xlsx]

## Sheet: Table S4 Biallelic SNPs
Supplementary File 4. Biallelic SNPs. This table contains information on the biallelic SNPS from within the non-paralogous windows used for analyzing the regions of interest on chromosomes 5, 7, 8, 11, and 13. These variable regions can be found compleely within the windows of Supporting Information Table 2 and 3.
Chromosome=Window's chromosome name in 3D7 Start Position=Window's starting base position (0-based) End Position=Window's ending base position (0-based) Chromosome: Start-End Position=Window's chromosome name, starting, and ending base positions Window Length: Window's length (=End Position - Start Position) Strand (+/-): Positive or negative DNA strand that window is in respect to Functional Ann…
Chromosome	Start Position	End Position	Chromosome: Start-End Position	Window Length	Strand (+/-)	Functional Annotation
Pf3D7_05_v3	929392	929393	Pf3D7_05_v3-929392-929393	1	+	[ID=PF3D7_0522400;feature=gene;description=conserved Plasmodium protein, unknown function;]
Pf3D7_05_v3	929598	929599	Pf3D7_05_v3-929598-929599	1	+	[ID=PF3D7_0522400;feature=gene;description=conserved Plasmodium protein, unknown function;]
Pf3D7_05_v3	929603	929604	Pf3D7_05_v3-929603-929604	1	+	[ID=PF3D7_0522400;feature=gene;description=conserved Plasmodium protein, unknown function;]
Pf3D7_05_v3	929883	929884	Pf3D7_05_v3-929883-929884	1	+	[ID=PF3D7_0522400;feature=gene;description=conserved Plasmodium protein, unknown function;]
Pf3D7_05_v3	930434	930435	Pf3D7_05_v3-930434-930435	1	+	[ID=PF3D7_0522400;feature=gene;description=conserved Plasmodium protein, unknown function;]
Pf3D7_05_v3	930946	930947	Pf3D7_05_v3-930946-930947	1	+	[ID=PF3D7_0522400;feature=gene;description=conserved Plasmodium protein, unknown function;]
Pf3D7_05_v3	933473	933474	Pf3D7_05_v3-933473-933474	1	+	[ID=PF3D7_0522400;feature=gene;description=conserved Plasmodium protein, unknown function;]
Pf3D7_05_v3	935041	935042	Pf3D7_05_v3-935041-935042	1	+	[ID=PF3D7_0522400;feature=gene;description=conserved Plasmodium protein, unknown function;]
Pf3D7_05_v3	935134	935135	Pf3D7_05_v3-935134-935135	1	+	[ID=PF3D7_0522400;feature=gene;description=conserved Plasmodium protein, unknown function;]
Pf3D7_05_v3	936276	936277	Pf3D7_05_v3-936276-936277	1	+	[ID=PF3D7_0522400;feature=gene;description=conserved Plasmodium protein, unknown function;]
Pf3D7_05_v3	936294	936295	Pf3D7_05_v3-936294-936295	1	+	[ID=PF3D7_0522400;feature=gene;description=conserved Plasmodium protein, unknown function;]
Pf3D7_05_v3	937120	937121	Pf3D7_05_v3-937120-937121	1	+
Pf3D7_05_v3	937427	937428	Pf3D7_05_v3-937427-937428	1	+	[ID=PF3D7_0522500;feature=gene;description=50S ribosomal protein L17, apicoplast, putative;]
Pf3D7_05_v3	937823	937824	Pf3D7_05_v3-937823-937824	1	+	[ID=PF3D7_0522500;feature=gene;description=50S ribosomal protein L17, apicoplast, putative;]
Pf3D7_05_v3	939629	939630	Pf3D7_05_v3-939629-939630	1	+
Pf3D7_05_v3	939769	939770	Pf3D7_05_v3-939769-939770	1	+
Pf3D7_05_v3	940274	940275	Pf3D7_05_v3-940274-940275	1	+	[ID=PF3D7_0522600;feature=gene;description=magnesium transporter NIPA, putative;]
Pf3D7_05_v3	940532	940533	Pf3D7_05_v3-940532-940533	1	+	[ID=PF3D7_0522600;feature=gene;description=magnesium transporter NIPA, putative;]
Pf3D7_05_v3	940571	940572	Pf3D7_05_v3-940571-940572	1	+	[ID=PF3D7_0522600;feature=gene;description=magnesium transporter NIPA, putative;]
Pf3D7_05_v3	940574	940575	Pf3D7_05_v3-940574-940575	1	+	[ID=PF3D7_0522600;feature=gene;description=magnesium transporter NIPA, putative;]
Pf3D7_05_v3	940676	940677	Pf3D7_05_v3-940676-940677	1	+	[ID=PF3D7_0522600;feature=gene;description=magnesium transporter NIPA, putative;]
Pf3D7_05_v3	941154	941155	Pf3D7_05_v3-941154-941155	1	+	[ID=PF3D7_0522600;feature=gene;description=magnesium transporter NIPA, putative;]
Pf3D7_05_v3	945453	945454	Pf3D7_05_v3-945453-945454	1	+
Pf3D7_05_v3	945642	945643	Pf3D7_05_v3-945642-945643	1	+
Pf3D7_05_v3	947081	947082	Pf3D7_05_v3-947081-947082	1	+
Pf3D7_05_v3	947174	947175	Pf3D7_05_v3-947174-947175	1	+
Pf3D7_05_v3	947175	947176	Pf3D7_05_v3-947175-947176	1	+
Pf3D7_05_v3	947292	947293	Pf3D7_05_v3-947292-947293	1	+
Pf3D7_05_v3	949042	949043	Pf3D7_05_v3-949042-949043	1	+	[ID=PF3D7_0522900;feature=gene;description=zinc finger protein, putative;]
Pf3D7_05_v3	949102	949103	Pf3D7_05_v3-949102-949103	1	+	[ID=PF3D7_0522900;feature=gene;description=zinc finger protein, putative;]
Pf3D7_05_v3	949157	949158	Pf3D7_05_v3-949157-949158	1	+	[ID=PF3D7_0522900;feature=gene;description=zinc finger protein, putative;]
Pf3D7_05_v3	950916	950917	Pf3D7_05_v3-950916-950917	1	+	[ID=PF3D7_0522900;feature=gene;description=zinc finger protein, putative;]
Pf3D7_05_v3	951119	951120	Pf3D7_05_v3-951119-951120	1	+	[ID=PF3D7_0522900;feature=gene;description=zinc finger protein, putative;]
Pf3D7_05_v3	952090	952091	Pf3D7_05_v3-952090-952091	1	+	[ID=PF3D7_0522900;feature=gene;description=zinc finger protein, putative;]
Pf3D7_05_v3	952154	952155	Pf3D7_05_v3-952154-952155	1	+	[ID=PF3D7_0522900;feature=gene;description=zinc finger protein, putative;]
Pf3D7_05_v3	952342	952343	Pf3D7_05_v3-952342-952343	1	+	[ID=PF3D7_0522900;feature=gene;description=zinc finger protein, putative;]
Pf3D7_05_v3	952579	952580	Pf3D7_05_v3-952579-952580	1	+	[ID=PF3D7_0522900;feature=gene;description=zinc finger protein, putative;]
Pf3D7_05_v3	953165	953166	Pf3D7_05_v3-953165-953166	1	+	[ID=PF3D7_0522900;feature=gene;description=zinc finger protein, putative;]
Pf3D7_05_v3	953378	953379	Pf3D7_05_v3-953378-953379	1	+	[ID=PF3D7_0522900;feature=gene;description=zinc finger protein, putative;]
Pf3D7_05_v3	953480	953481	Pf3D7_05_v3-953480-953481	1	+	[ID=PF3D7_0522900;feature=gene;description=zinc finger protein, putative;]
Pf3D7_05_v3	954168	954169	Pf3D7_05_v3-954168-954169	1	+
Pf3D7_05_v3	954731	954732	Pf3D7_05_v3-954731-954732	1	+
Pf3D7_05_v3	954829	954830	Pf3D7_05_v3-954829-954830	1	+
Pf3D7_05_v3	958144	958145	Pf3D7_05_v3-958144-958145	1	+	[ID=PF3D7_0523000;feature=gene;description=multidrug'+resistance'+protein'+1;]
Pf3D7_05_v3	958319	958320	Pf3D7_05_v3-958319-958320	1	+	[ID=PF3D7_0523000;feature=gene;description=multidrug'+resistance'+protein'+1;]
Pf3D7_05_v3	958439	958440	Pf3D7_05_v3-958439-958440	1	+	[ID=PF3D7_0523000;feature=gene;description=multidrug'+resistance'+protein'+1;]
Pf3D7_05_v3	958858	958859	Pf3D7_05_v3-958858-958859	1	+	[ID=PF3D7_0523000;feature=gene;description=multidrug'+resistance'+protein'+1;]
Pf3D7_05_v3	960136	960137	Pf3D7_05_v3-960136-960137	1	+	[ID=PF3D7_0523000;feature=gene;description=multidrug'+resistance'+protein'+1;]
Pf3D7_05_v3	960408	960409	Pf3D7_05_v3-960408-960409	1	+	[ID=PF3D7_0523000;feature=gene;description=multidrug'+resistance'+protein'+1;]
Pf3D7_05_v3	960528	960529	Pf3D7_05_v3-960528-960529	1	+	[ID=PF3D7_0523000;feature=gene;description=multidrug'+resistance'+protein'+1;]
Pf3D7_05_v3	960701	960702	Pf3D7_05_v3-960701-960702	1	+	[ID=PF3D7_0523000;feature=gene;description=multidrug'+resistance'+protein'+1;]
Pf3D7_05_v3	960988	960989	Pf3D7_05_v3-960988-960989	1	+	[ID=PF3D7_0523000;feature=gene;description=multidrug'+resistance'+protein'+1;]
Pf3D7_05_v3	961012	961013	Pf3D7_05_v3-961012-961013	1	+	[ID=PF3D7_0523000;feature=gene;description=multidrug'+resistance'+protein'+1;]
Pf3D7_05_v3	961095	961096	Pf3D7_05_v3-961095-961096	1	+	[ID=PF3D7_0523000;feature=gene;description=multidrug'+resistance'+protein'+1;]
Pf3D7_05_v3	961565	961566	Pf3D7_05_v3-961565-961566	1	+	[ID=PF3D7_0523000;feature=gene;description=multidrug'+resistance'+protein'+1;]
Pf3D7_05_v3	961624	961625	Pf3D7_05_v3-961624-961625	1	+	[ID=PF3D7_0523000;feature=gene;description=multidrug'+resistance'+protein'+1;]
Pf3D7_05_v3	963174	963175	Pf3D7_05_v3-963174-963175	1	+
Pf3D7_05_v3	964675	964676	Pf3D7_05_v3-964675-964676	1	+	[ID=PF3D7_0523100;feature=gene;description=mitochondrial-processing peptidase subunit alpha, putative;]
Pf3D7_05_v3	965694	965695	Pf3D7_05_v3-965694-965695	1	+
Pf3D7_05_v3	966294	966295	Pf3D7_05_v3-966294-966295	1	+	[ID=PF3D7_0523200;feature=gene;description=heptatricopeptide repeat-containing protein, putative;]
Pf3D7_05_v3	966313	966314	Pf3D7_05_v3-966313-966314	1	+	[ID=PF3D7_0523200;feature=gene;description=heptatricopeptide repeat-containing protein, putative;]
Pf3D7_05_v3	966387	966388	Pf3D7_05_v3-966387-966388	1	+	[ID=PF3D7_0523200;feature=gene;description=heptatricopeptide repeat-containing protein, putative;]
Pf3D7_05_v3	966580	966581	Pf3D7_05_v3-966580-966581	1	+	[ID=PF3D7_0523200;feature=gene;description=heptatricopeptide repeat-containing protein, putative;]
Pf3D7_05_v3	966808	966809	Pf3D7_05_v3-966808-966809	1	+	[ID=PF3D7_0523200;feature=gene;description=heptatricopeptide repeat-containing protein, putative;]
Pf3D7_05_v3	967646	967647	Pf3D7_05_v3-967646-967647	1	+	[ID=PF3D7_0523200;feature=gene;description=heptatricopeptide repeat-containing protein, putative;]
Pf3D7_05_v3	967819	967820	Pf3D7_05_v3-967819-967820	1	+	[ID=PF3D7_0523200;feature=gene;description=heptatricopeptide repeat-containing protein, putative;]
Pf3D7_05_v3	968701	968702	Pf3D7_05_v3-968701-968702	1	+	[ID=PF3D7_0523200;feature=gene;description=heptatricopeptide repeat-containing protein, putative;]
Pf3D7_05_v3	971416	971417	Pf3D7_05_v3-971416-971417	1	+
Pf3D7_05_v3	973718	973719	Pf3D7_05_v3-973718-973719	1	+	[ID=PF3D7_0523400;feature=gene;description=DnaJ protein, putative;]
Pf3D7_05_v3	979750	979751	Pf3D7_05_v3-979750-979751	1	+	[ID=PF3D7_0523600;feature=gene;description=conserved protein, unknown function;]
Pf3D7_05_v3	981739	981740	Pf3D7_05_v3-981739-981740	1	+	[ID=PF3D7_0523700;feature=gene;description=conserved Plasmodium membrane protein, unknown function;]
Pf3D7_05_v3	983054	983055	Pf3D7_05_v3-983054-983055	1	+	[ID=PF3D7_0523700;feature=gene;description=conserved Plasmodium membrane protein, unknown function;]
Pf3D7_05_v3	983056	983057	Pf3D7_05_v3-983056-983057	1	+	[ID=PF3D7_0523700;feature=gene;description=conserved Plasmodium membrane protein, unknown function;]
Pf3D7_05_v3	983292	983293	Pf3D7_05_v3-983292-983293	1	+	[ID=PF3D7_0523700;feature=gene;description=conserved Plasmodium membrane protein, unknown function;]
Pf3D7_05_v3	983352	983353	Pf3D7_05_v3-983352-983353	1	+	[ID=PF3D7_0523700;feature=gene;description=conserved Plasmodium membrane protein, unknown function;]
Pf3D7_05_v3	983891	983892	Pf3D7_05_v3-983891-983892	1	+	[ID=PF3D7_0523700;feature=gene;description=conserved Plasmodium membrane protein, unknown function;]
Pf3D7_05_v3	983941	983942	Pf3D7_05_v3-983941-983942	1	+	[ID=PF3D7_0523700;feature=gene;description=conserved Plasmodium membrane protein, unknown function;]
Pf3D7_05_v3	984522	984523	Pf3D7_05_v3-984522-984523	1	+	[ID=PF3D7_0523700;feature=gene;description=conserved Plasmodium membrane protein, unknown function;]
Pf3D7_05_v3	986202	986203	Pf3D7_05_v3-986202-986203	1	+
Pf3D7_05_v3	986956	986957	Pf3D7_05_v3-986956-986957	1	+
Pf3D7_08_v3	1290379	1290380	Pf3D7_08_v3-1290379-1290380	1	+	[ID=PF3D7_0830300;feature=gene;description=sporozoite'+invasion-associated'+protein'+2;]
Pf3D7_08_v3	1290439	1290440	Pf3D7_08_v3-1290439-1290440	1	+	[ID=PF3D7_0830300;feature=gene;description=sporozoite'+invasion-associated'+protein'+2;]
Pf3D7_08_v3	1290465	1290466	Pf3D7_08_v3-1290465-1290466	1	+	[ID=PF3D7_0830300;feature=gene;description=sporozoite'+invasion-associated'+protein'+2;]
Pf3D7_08_v3	1290495	1290496	Pf3D7_08_v3-1290495-1290496	1	+	[ID=PF3D7_0830300;feature=gene;description=sporozoite'+invasion-associated'+protein'+2;]
Pf3D7_08_v3	1290511	1290512	Pf3D7_08_v3-1290511-1290512	1	+	[ID=PF3D7_0830300;feature=gene;description=sporozoite'+invasion-associated'+protein'+2;]
Pf3D7_08_v3	1290530	1290531	Pf3D7_08_v3-1290530-1290531	1	+	[ID=PF3D7_0830300;feature=gene;description=sporozoite'+invasion-associated'+protein'+2;]
Pf3D7_08_v3	1290559	1290560	Pf3D7_08_v3-1290559-1290560	1	+	[ID=PF3D7_0830300;feature=gene;description=sporozoite'+invasion-associated'+protein'+2;]
Pf3D7_08_v3	1290565	1290566	Pf3D7_08_v3-1290565-1290566	1	+	[ID=PF3D7_0830300;feature=gene;description=sporozoite'+invasion-associated'+protein'+2;]
Pf3D7_08_v3	1290579	1290580	Pf3D7_08_v3-1290579-1290580	1	+	[ID=PF3D7_0830300;feature=gene;description=sporozoite'+invasion-associated'+protein'+2;]
Pf3D7_08_v3	1290666	1290667	Pf3D7_08_v3-1290666-1290667	1	+	[ID=PF3D7_0830300;feature=gene;description=sporozoite'+invasion-associated'+protein'+2;]
Pf3D7_08_v3	1290690	1290691	Pf3D7_08_v3-1290690-1290691	1	+	[ID=PF3D7_0830300;feature=gene;description=sporozoite'+invasion-associated'+protein'+2;]
Pf3D7_08_v3	1290855	1290856	Pf3D7_08_v3-1290855-1290856	1	+	[ID=PF3D7_0830300;feature=gene;description=sporozoite'+invasion-associated'+protein'+2;]
Pf3D7_08_v3	1290877	1290878	Pf3D7_08_v3-1290877-1290878	1	+	[ID=PF3D7_0830300;feature=gene;description=sporozoite'+invasion-associated'+protein'+2;]
Pf3D7_08_v3	1290916	1290917	Pf3D7_08_v3-1290916-1290917	1	+	[ID=PF3D7_0830300;feature=gene;description=sporozoite'+invasion-associated'+protein'+2;]
Pf3D7_08_v3	1290960	1290961	Pf3D7_08_v3-1290960-1290961	1	+	[ID=PF3D7_0830300;feature=gene;description=sporozoite'+invasion-associated'+protein'+2;]
Pf3D7_08_v3	1291119	1291120	Pf3D7_08_v3-1291119-1291120	1	+	[ID=PF3D7_0830300;feature=gene;description=sporozoite'+invasion-associated'+protein'+2;]
Pf3D7_08_v3	1291123	1291124	Pf3D7_08_v3-1291123-1291124	1	+	[ID=PF3D7_0830300;feature=gene;description=sporozoite'+invasion-associated'+protein'+2;]
Pf3D7_08_v3	1293510	1293511	Pf3D7_08_v3-1293510-1293511	1	+
Pf3D7_08_v3	1297356	1297357	Pf3D7_08_v3-1297356-1297357	1	+	[ID=PF3D7_0830500;feature=gene;description=sporozoite and liver stage tryptophan-rich protein, putative;]
Pf3D7_08_v3	1297444	1297445	Pf3D7_08_v3-1297444-1297445	1	+	[ID=PF3D7_0830500;feature=gene;description=sporozoite and liver stage tryptophan-rich protein, putative;]
Pf3D7_08_v3	1297567	1297568	Pf3D7_08_v3-1297567-1297568	1	+	[ID=PF3D7_0830500;feature=gene;description=sporozoite and liver stage tryptophan-rich protein, putative;]
Pf3D7_08_v3	1297574	1297575	Pf3D7_08_v3-1297574-1297575	1	+	[ID=PF3D7_0830500;feature=gene;description=sporozoite and liver stage tryptophan-rich protein, putative;]
Pf3D7_08_v3	1297575	1297576	Pf3D7_08_v3-1297575-1297576	1	+	[ID=PF3D7_0830500;feature=gene;description=sporozoite and liver stage tryptophan-rich protein, putative;]
Pf3D7_08_v3	1297593	1297594	Pf3D7_08_v3-1297593-1297594	1	+	[ID=PF3D7_0830500;feature=gene;description=sporozoite and liver stage tryptophan-rich protein, putative;]
Pf3D7_08_v3	1297694	1297695	Pf3D7_08_v3-1297694-1297695	1	+	[ID=PF3D7_0830500;feature=gene;description=sporozoite and liver stage tryptophan-rich protein, putative;]
Pf3D7_08_v3	1297698	1297699	Pf3D7_08_v3-1297698-1297699	1	+	[ID=PF3D7_0830500;feature=gene;description=sporozoite and liver stage tryptophan-rich protein, putative;]
Pf3D7_08_v3	1298299	1298300	Pf3D7_08_v3-1298299-1298300	1	+	[ID=PF3D7_0830500;feature=gene;description=sporozoite and liver stage tryptophan-rich protein, putative;]
Pf3D7_08_v3	1298625	1298626	Pf3D7_08_v3-1298625-1298626	1	+
Pf3D7_08_v3	1299010	1299011	Pf3D7_08_v3-1299010-1299011	1	+
Pf3D7_08_v3	1300207	1300208	Pf3D7_08_v3-1300207-1300208	1	+
Pf3D7_08_v3	1300229	1300230	Pf3D7_08_v3-1300229-1300230	1	+
Pf3D7_08_v3	1300449	1300450	Pf3D7_08_v3-1300449-1300450	1	+
Pf3D7_08_v3	1300461	1300462	Pf3D7_08_v3-1300461-1300462	1	+
Pf3D7_08_v3	1300704	1300705	Pf3D7_08_v3-1300704-1300705	1	+
Pf3D7_08_v3	1300847	1300848	Pf3D7_08_v3-1300847-1300848	1	+
Pf3D7_08_v3	1300895	1300896	Pf3D7_08_v3-1300895-1300896	1	+
Pf3D7_08_v3	1302797	1302798	Pf3D7_08_v3-1302797-1302798	1	+
Pf3D7_08_v3	1303309	1303310	Pf3D7_08_v3-1303309-1303310	1	+
Pf3D7_08_v3	1303340	1303341	Pf3D7_08_v3-1303340-1303341	1	+	[ID=PF3D7_0830600;feature=gene;description="Plasmodium exported protein (PHISTc), unknown function";]
Pf3D7_08_v3	1303836	1303837	Pf3D7_08_v3-1303836-1303837	1	+	[ID=PF3D7_0830600;feature=gene;description="Plasmodium exported protein (PHISTc), unknown function";]
Pf3D7_08_v3	1304028	1304029	Pf3D7_08_v3-1304028-1304029	1	+	[ID=PF3D7_0830600;feature=gene;description="Plasmodium exported protein (PHISTc), unknown function";]
Pf3D7_08_v3	1304261	1304262	Pf3D7_08_v3-1304261-1304262	1	+	[ID=PF3D7_0830600;feature=gene;description="Plasmodium exported protein (PHISTc), unknown function";]
Pf3D7_08_v3	1304485	1304486	Pf3D7_08_v3-1304485-1304486	1	+	[ID=PF3D7_0830600;feature=gene;description="Plasmodium exported protein (PHISTc), unknown function";]
Pf3D7_08_v3	1304651	1304652	Pf3D7_08_v3-1304651-1304652	1	+	[ID=PF3D7_0830600;feature=gene;description="Plasmodium exported protein (PHISTc), unknown function";]
Pf3D7_08_v3	1304762	1304763	Pf3D7_08_v3-1304762-1304763	1	+	[ID=PF3D7_0830600;feature=gene;description="Plasmodium exported protein (PHISTc), unknown function";]
Pf3D7_08_v3	1304763	1304764	Pf3D7_08_v3-1304763-1304764	1	+	[ID=PF3D7_0830600;feature=gene;description="Plasmodium exported protein (PHISTc), unknown function";]
Pf3D7_08_v3	1305677	1305678	Pf3D7_08_v3-1305677-1305678	1	+
Pf3D7_08_v3	1307345	1307346	Pf3D7_08_v3-1307345-1307346	1	+	[ID=PF3D7_0830700;feature=gene;description="Plasmodium exported protein (hyp9), unknown function";]
Pf3D7_08_v3	1307356	1307357	Pf3D7_08_v3-1307356-1307357	1	+	[ID=PF3D7_0830700;feature=gene;description="Plasmodium exported protein (hyp9), unknown function";]
Pf3D7_08_v3	1307832	1307833	Pf3D7_08_v3-1307832-1307833	1	+	[ID=PF3D7_0830700;feature=gene;description="Plasmodium exported protein (hyp9), unknown function";]
Pf3D7_08_v3	1308432	1308433	Pf3D7_08_v3-1308432-1308433	1	+
Pf3D7_08_v3	1308516	1308517	Pf3D7_08_v3-1308516-1308517	1	+
Pf3D7_08_v3	1308560	1308561	Pf3D7_08_v3-1308560-1308561	1	+
Pf3D7_08_v3	1308578	1308579	Pf3D7_08_v3-1308578-1308579	1	+
Pf3D7_08_v3	1308579	1308580	Pf3D7_08_v3-1308579-1308580	1	+
Pf3D7_08_v3	1308920	1308921	Pf3D7_08_v3-1308920-1308921	1	+
Pf3D7_08_v3	1310664	1310665	Pf3D7_08_v3-1310664-1310665	1	+	[ID=PF3D7_0830800;feature=gene;description="surface-associated'+interspersed'+protein'+8.2'+(SURFIN'+8.2)";]
Pf3D7_08_v3	1310672	1310673	Pf3D7_08_v3-1310672-1310673	1	+	[ID=PF3D7_0830800;feature=gene;description="surface-associated'+interspersed'+protein'+8.2'+(SURFIN'+8.2)";]
Pf3D7_08_v3	1310675	1310676	Pf3D7_08_v3-1310675-1310676	1	+	[ID=PF3D7_0830800;feature=gene;description="surface-associated'+interspersed'+protein'+8.2'+(SURFIN'+8.2)";]
Pf3D7_08_v3	1310686	1310687	Pf3D7_08_v3-1310686-1310687	1	+	[ID=PF3D7_0830800;feature=gene;description="surface-associated'+interspersed'+protein'+8.2'+(SURFIN'+8.2)";]
Pf3D7_08_v3	1310713	1310714	Pf3D7_08_v3-1310713-1310714	1	+	[ID=PF3D7_0830800;feature=gene;description="surface-associated'+interspersed'+protein'+8.2'+(SURFIN'+8.2)";]
Pf3D7_08_v3	1310721	1310722	Pf3D7_08_v3-1310721-1310722	1	+	[ID=PF3D7_0830800;feature=gene;description="surface-associated'+interspersed'+protein'+8.2'+(SURFIN'+8.2)";]
Pf3D7_08_v3	1310739	1310740	Pf3D7_08_v3-1310739-1310740	1	+	[ID=PF3D7_0830800;feature=gene;description="surface-associated'+interspersed'+protein'+8.2'+(SURFIN'+8.2)";]
Pf3D7_08_v3	1310758	1310759	Pf3D7_08_v3-1310758-1310759	1	+	[ID=PF3D7_0830800;feature=gene;description="surface-associated'+interspersed'+protein'+8.2'+(SURFIN'+8.2)";]
Pf3D7_08_v3	1310759	1310760	Pf3D7_08_v3-1310759-1310760	1	+	[ID=PF3D7_0830800;feature=gene;description="surface-associated'+interspersed'+protein'+8.2'+(SURFIN'+8.2)";]
Pf3D7_08_v3	1310804	1310805	Pf3D7_08_v3-1310804-1310805	1	+	[ID=PF3D7_0830800;feature=gene;description="surface-associated'+interspersed'+protein'+8.2'+(SURFIN'+8.2)";]
Pf3D7_08_v3	1310809	1310810	Pf3D7_08_v3-1310809-1310810	1	+	[ID=PF3D7_0830800;feature=gene;description="surface-associated'+interspersed'+protein'+8.2'+(SURFIN'+8.2)";]
Pf3D7_08_v3	1310861	1310862	Pf3D7_08_v3-1310861-1310862	1	+	[ID=PF3D7_0830800;feature=gene;description="surface-associated'+interspersed'+protein'+8.2'+(SURFIN'+8.2)";]
Pf3D7_08_v3	1310865	1310866	Pf3D7_08_v3-1310865-1310866	1	+	[ID=PF3D7_0830800;feature=gene;description="surface-associated'+interspersed'+protein'+8.2'+(SURFIN'+8.2)";]
Pf3D7_08_v3	1310870	1310871	Pf3D7_08_v3-1310870-1310871	1	+	[ID=PF3D7_0830800;feature=gene;description="surface-associated'+interspersed'+protein'+8.2'+(SURFIN'+8.2)";]
Pf3D7_08_v3	1310888	1310889	Pf3D7_08_v3-1310888-1310889	1	+	[ID=PF3D7_0830800;feature=gene;description="surface-associated'+interspersed'+protein'+8.2'+(SURFIN'+8.2)";]
Pf3D7_08_v3	1310902	1310903	Pf3D7_08_v3-1310902-1310903	1	+	[ID=PF3D7_0830800;feature=gene;description="surface-associated'+interspersed'+protein'+8.2'+(SURFIN'+8.2)";]
Pf3D7_08_v3	1310909	1310910	Pf3D7_08_v3-1310909-1310910	1	+	[ID=PF3D7_0830800;feature=gene;description="surface-associated'+interspersed'+protein'+8.2'+(SURFIN'+8.2)";]
Pf3D7_08_v3	1310969	1310970	Pf3D7_08_v3-1310969-1310970	1	+	[ID=PF3D7_0830800;feature=gene;description="surface-associated'+interspersed'+protein'+8.2'+(SURFIN'+8.2)";]
Pf3D7_08_v3	1310974	1310975	Pf3D7_08_v3-1310974-1310975	1	+	[ID=PF3D7_0830800;feature=gene;description="surface-associated'+interspersed'+protein'+8.2'+(SURFIN'+8.2)";]
Pf3D7_08_v3	1310988	1310989	Pf3D7_08_v3-1310988-1310989	1	+	[ID=PF3D7_0830800;feature=gene;description="surface-associated'+interspersed'+protein'+8.2'+(SURFIN'+8.2)";]
Pf3D7_08_v3	1310990	1310991	Pf3D7_08_v3-1310990-1310991	1	+	[ID=PF3D7_0830800;feature=gene;description="surface-associated'+interspersed'+protein'+8.2'+(SURFIN'+8.2)";]
Pf3D7_08_v3	1311019	1311020	Pf3D7_08_v3-1311019-1311020	1	+	[ID=PF3D7_0830800;feature=gene;description="surface-associated'+interspersed'+protein'+8.2'+(SURFIN'+8.2)";]
Pf3D7_08_v3	1311030	1311031	Pf3D7_08_v3-1311030-1311031	1	+	[ID=PF3D7_0830800;feature=gene;description="surface-associated'+interspersed'+protein'+8.2'+(SURFIN'+8.2)";]
Pf3D7_08_v3	1311040	1311041	Pf3D7_08_v3-1311040-1311041	1	+	[ID=PF3D7_0830800;feature=gene;description="surface-associated'+interspersed'+protein'+8.2'+(SURFIN'+8.2)";]
Pf3D7_08_v3	1311041	1311042	Pf3D7_08_v3-1311041-1311042	1	+	[ID=PF3D7_0830800;feature=gene;description="surface-associated'+interspersed'+protein'+8.2'+(SURFIN'+8.2)";]
Pf3D7_08_v3	1311082	1311083	Pf3D7_08_v3-1311082-1311083	1	+	[ID=PF3D7_0830800;feature=gene;description="surface-associated'+interspersed'+protein'+8.2'+(SURFIN'+8.2)";]
Pf3D7_08_v3	1311086	1311087	Pf3D7_08_v3-1311086-1311087	1	+	[ID=PF3D7_0830800;feature=gene;description="surface-associated'+interspersed'+protein'+8.2'+(SURFIN'+8.2)";]
Pf3D7_08_v3	1311092	1311093	Pf3D7_08_v3-1311092-1311093	1	+	[ID=PF3D7_0830800;feature=gene;description="surface-associated'+interspersed'+protein'+8.2'+(SURFIN'+8.2)";]
Pf3D7_08_v3	1311104	1311105	Pf3D7_08_v3-1311104-1311105	1	+	[ID=PF3D7_0830800;feature=gene;description="surface-associated'+interspersed'+protein'+8.2'+(SURFIN'+8.2)";]
Pf3D7_08_v3	1311115	1311116	Pf3D7_08_v3-1311115-1311116	1	+	[ID=PF3D7_0830800;feature=gene;description="surface-associated'+interspersed'+protein'+8.2'+(SURFIN'+8.2)";]
Pf3D7_08_v3	1311131	1311132	Pf3D7_08_v3-1311131-1311132	1	+	[ID=PF3D7_0830800;feature=gene;description="surface-associated'+interspersed'+protein'+8.2'+(SURFIN'+8.2)";]
Pf3D7_08_v3	1311146	1311147	Pf3D7_08_v3-1311146-1311147	1	+	[ID=PF3D7_0830800;feature=gene;description="surface-associated'+interspersed'+protein'+8.2'+(SURFIN'+8.2)";]
Pf3D7_08_v3	1311149	1311150	Pf3D7_08_v3-1311149-1311150	1	+	[ID=PF3D7_0830800;feature=gene;description="surface-associated'+interspersed'+protein'+8.2'+(SURFIN'+8.2)";]
Pf3D7_08_v3	1311157	1311158	Pf3D7_08_v3-1311157-1311158	1	+	[ID=PF3D7_0830800;feature=gene;description="surface-associated'+interspersed'+protein'+8.2'+(SURFIN'+8.2)";]
Pf3D7_08_v3	1311212	1311213	Pf3D7_08_v3-1311212-1311213	1	+	[ID=PF3D7_0830800;feature=gene;description="surface-associated'+interspersed'+protein'+8.2'+(SURFIN'+8.2)";]
Pf3D7_08_v3	1311223	1311224	Pf3D7_08_v3-1311223-1311224	1	+	[ID=PF3D7_0830800;feature=gene;description="surface-associated'+interspersed'+protein'+8.2'+(SURFIN'+8.2)";]
Pf3D7_08_v3	1311228	1311229	Pf3D7_08_v3-1311228-1311229	1	+	[ID=PF3D7_0830800;feature=gene;description="surface-associated'+interspersed'+protein'+8.2'+(SURFIN'+8.2)";]
Pf3D7_08_v3	1311240	1311241	Pf3D7_08_v3-1311240-1311241	1	+	[ID=PF3D7_0830800;feature=gene;description="surface-associated'+interspersed'+protein'+8.2'+(SURFIN'+8.2)";]
Pf3D7_08_v3	1311261	1311262	Pf3D7_08_v3-1311261-1311262	1	+	[ID=PF3D7_0830800;feature=gene;description="surface-associated'+interspersed'+protein'+8.2'+(SURFIN'+8.2)";]
Pf3D7_08_v3	1311276	1311277	Pf3D7_08_v3-1311276-1311277	1	+	[ID=PF3D7_0830800;feature=gene;description="surface-associated'+interspersed'+protein'+8.2'+(SURFIN'+8.2)";]
Pf3D7_08_v3	1311290	1311291	Pf3D7_08_v3-1311290-1311291	1	+	[ID=PF3D7_0830800;feature=gene;description="surface-associated'+interspersed'+protein'+8.2'+(SURFIN'+8.2)";]
Pf3D7_08_v3	1311300	1311301	Pf3D7_08_v3-1311300-1311301	1	+	[ID=PF3D7_0830800;feature=gene;description="surface-associated'+interspersed'+protein'+8.2'+(SURFIN'+8.2)";]
Pf3D7_08_v3	1311353	1311354	Pf3D7_08_v3-1311353-1311354	1	+	[ID=PF3D7_0830800;feature=gene;description="surface-associated'+interspersed'+protein'+8.2'+(SURFIN'+8.2)";]
Pf3D7_08_v3	1311357	1311358	Pf3D7_08_v3-1311357-1311358	1	+	[ID=PF3D7_0830800;feature=gene;description="surface-associated'+interspersed'+protein'+8.2'+(SURFIN'+8.2)";]
Pf3D7_08_v3	1311393	1311394	Pf3D7_08_v3-1311393-1311394	1	+	[ID=PF3D7_0830800;feature=gene;description="surface-associated'+interspersed'+protein'+8.2'+(SURFIN'+8.2)";]
Pf3D7_08_v3	1311413	1311414	Pf3D7_08_v3-1311413-1311414	1	+	[ID=PF3D7_0830800;feature=gene;description="surface-associated'+interspersed'+protein'+8.2'+(SURFIN'+8.2)";]
Pf3D7_08_v3	1311428	1311429	Pf3D7_08_v3-1311428-1311429	1	+	[ID=PF3D7_0830800;feature=gene;description="surface-associated'+interspersed'+protein'+8.2'+(SURFIN'+8.2)";]
Pf3D7_08_v3	1311429	1311430	Pf3D7_08_v3-1311429-1311430	1	+	[ID=PF3D7_0830800;feature=gene;description="surface-associated'+interspersed'+protein'+8.2'+(SURFIN'+8.2)";]
Pf3D7_08_v3	1311437	1311438	Pf3D7_08_v3-1311437-1311438	1	+	[ID=PF3D7_0830800;feature=gene;description="surface-associated'+interspersed'+protein'+8.2'+(SURFIN'+8.2)";]
Pf3D7_08_v3	1311452	1311453	Pf3D7_08_v3-1311452-1311453	1	+	[ID=PF3D7_0830800;feature=gene;description="surface-associated'+interspersed'+protein'+8.2'+(SURFIN'+8.2)";]
Pf3D7_08_v3	1311458	1311459	Pf3D7_08_v3-1311458-1311459	1	+	[ID=PF3D7_0830800;feature=gene;description="surface-associated'+interspersed'+protein'+8.2'+(SURFIN'+8.2)";]
Pf3D7_08_v3	1311465	1311466	Pf3D7_08_v3-1311465-1311466	1	+	[ID=PF3D7_0830800;feature=gene;description="surface-associated'+interspersed'+protein'+8.2'+(SURFIN'+8.2)";]
Pf3D7_08_v3	1311470	1311471	Pf3D7_08_v3-1311470-1311471	1	+	[ID=PF3D7_0830800;feature=gene;description="surface-associated'+interspersed'+protein'+8.2'+(SURFIN'+8.2)";]
Pf3D7_08_v3	1311482	1311483	Pf3D7_08_v3-1311482-1311483	1	+	[ID=PF3D7_0830800;feature=gene;description="surface-associated'+interspersed'+protein'+8.2'+(SURFIN'+8.2)";]
Pf3D7_08_v3	1311486	1311487	Pf3D7_08_v3-1311486-1311487	1	+	[ID=PF3D7_0830800;feature=gene;description="surface-associated'+interspersed'+protein'+8.2'+(SURFIN'+8.2)";]
Pf3D7_08_v3	1311488	1311489	Pf3D7_08_v3-1311488-1311489	1	+	[ID=PF3D7_0830800;feature=gene;description="surface-associated'+interspersed'+protein'+8.2'+(SURFIN'+8.2)";]
Pf3D7_08_v3	1311490	1311491	Pf3D7_08_v3-1311490-1311491	1	+	[ID=PF3D7_0830800;feature=gene;description="surface-associated'+interspersed'+protein'+8.2'+(SURFIN'+8.2)";]
Pf3D7_08_v3	1311491	1311492	Pf3D7_08_v3-1311491-1311492	1	+	[ID=PF3D7_0830800;feature=gene;description="surface-associated'+interspersed'+protein'+8.2'+(SURFIN'+8.2)";]
Pf3D7_08_v3	1311495	1311496	Pf3D7_08_v3-1311495-1311496	1	+	[ID=PF3D7_0830800;feature=gene;description="surface-associated'+interspersed'+protein'+8.2'+(SURFIN'+8.2)";]
Pf3D7_08_v3	1311518	1311519	Pf3D7_08_v3-1311518-1311519	1	+	[ID=PF3D7_0830800;feature=gene;description="surface-associated'+interspersed'+protein'+8.2'+(SURFIN'+8.2)";]
Pf3D7_08_v3	1311520	1311521	Pf3D7_08_v3-1311520-1311521	1	+	[ID=PF3D7_0830800;feature=gene;description="surface-associated'+interspersed'+protein'+8.2'+(SURFIN'+8.2)";]
Pf3D7_08_v3	1311533	1311534	Pf3D7_08_v3-1311533-1311534	1	+	[ID=PF3D7_0830800;feature=gene;description="surface-associated'+interspersed'+protein'+8.2'+(SURFIN'+8.2)";]
Pf3D7_08_v3	1311534	1311535	Pf3D7_08_v3-1311534-1311535	1	+	[ID=PF3D7_0830800;feature=gene;description="surface-associated'+interspersed'+protein'+8.2'+(SURFIN'+8.2)";]
Pf3D7_08_v3	1311538	1311539	Pf3D7_08_v3-1311538-1311539	1	+	[ID=PF3D7_0830800;feature=gene;description="surface-associated'+interspersed'+protein'+8.2'+(SURFIN'+8.2)";]
Pf3D7_08_v3	1311573	1311574	Pf3D7_08_v3-1311573-1311574	1	+	[ID=PF3D7_0830800;feature=gene;description="surface-associated'+interspersed'+protein'+8.2'+(SURFIN'+8.2)";]
Pf3D7_08_v3	1311583	1311584	Pf3D7_08_v3-1311583-1311584	1	+	[ID=PF3D7_0830800;feature=gene;description="surface-associated'+interspersed'+protein'+8.2'+(SURFIN'+8.2)";]
Pf3D7_08_v3	1311597	1311598	Pf3D7_08_v3-1311597-1311598	1	+	[ID=PF3D7_0830800;feature=gene;description="surface-associated'+interspersed'+protein'+8.2'+(SURFIN'+8.2)";]
Pf3D7_08_v3	1311604	1311605	Pf3D7_08_v3-1311604-1311605	1	+	[ID=PF3D7_0830800;feature=gene;description="surface-associated'+interspersed'+protein'+8.2'+(SURFIN'+8.2)";]
Pf3D7_08_v3	1311616	1311617	Pf3D7_08_v3-1311616-1311617	1	+	[ID=PF3D7_0830800;feature=gene;description="surface-associated'+interspersed'+protein'+8.2'+(SURFIN'+8.2)";]
Pf3D7_08_v3	1311618	1311619	Pf3D7_08_v3-1311618-1311619	1	+	[ID=PF3D7_0830800;feature=gene;description="surface-associated'+interspersed'+protein'+8.2'+(SURFIN'+8.2)";]
Pf3D7_08_v3	1311644	1311645	Pf3D7_08_v3-1311644-1311645	1	+	[ID=PF3D7_0830800;feature=gene;description="surface-associated'+interspersed'+protein'+8.2'+(SURFIN'+8.2)";]
Pf3D7_08_v3	1311663	1311664	Pf3D7_08_v3-1311663-1311664	1	+	[ID=PF3D7_0830800;feature=gene;description="surface-associated'+interspersed'+protein'+8.2'+(SURFIN'+8.2)";]
Pf3D7_08_v3	1311690	1311691	Pf3D7_08_v3-1311690-1311691	1	+	[ID=PF3D7_0830800;feature=gene;description="surface-associated'+interspersed'+protein'+8.2'+(SURFIN'+8.2)";]
Pf3D7_08_v3	1311697	1311698	Pf3D7_08_v3-1311697-1311698	1	+	[ID=PF3D7_0830800;feature=gene;description="surface-associated'+interspersed'+protein'+8.2'+(SURFIN'+8.2)";]
Pf3D7_08_v3	1311707	1311708	Pf3D7_08_v3-1311707-1311708	1	+	[ID=PF3D7_0830800;feature=gene;description="surface-associated'+interspersed'+protein'+8.2'+(SURFIN'+8.2)";]
Pf3D7_08_v3	1311711	1311712	Pf3D7_08_v3-1311711-1311712	1	+	[ID=PF3D7_0830800;feature=gene;description="surface-associated'+interspersed'+protein'+8.2'+(SURFIN'+8.2)";]
Pf3D7_08_v3	1311759	1311760	Pf3D7_08_v3-1311759-1311760	1	+	[ID=PF3D7_0830800;feature=gene;description="surface-associated'+interspersed'+protein'+8.2'+(SURFIN'+8.2)";]
Pf3D7_08_v3	1311765	1311766	Pf3D7_08_v3-1311765-1311766	1	+	[ID=PF3D7_0830800;feature=gene;description="surface-associated'+interspersed'+protein'+8.2'+(SURFIN'+8.2)";]
Pf3D7_08_v3	1311779	1311780	Pf3D7_08_v3-1311779-1311780	1	+	[ID=PF3D7_0830800;feature=gene;description="surface-associated'+interspersed'+protein'+8.2'+(SURFIN'+8.2)";]
Pf3D7_08_v3	1311786	1311787	Pf3D7_08_v3-1311786-1311787	1	+	[ID=PF3D7_0830800;feature=gene;description="surface-associated'+interspersed'+protein'+8.2'+(SURFIN'+8.2)";]
Pf3D7_08_v3	1311798	1311799	Pf3D7_08_v3-1311798-1311799	1	+	[ID=PF3D7_0830800;feature=gene;description="surface-associated'+interspersed'+protein'+8.2'+(SURFIN'+8.2)";]
Pf3D7_08_v3	1311804	1311805	Pf3D7_08_v3-1311804-1311805	1	+	[ID=PF3D7_0830800;feature=gene;description="surface-associated'+interspersed'+protein'+8.2'+(SURFIN'+8.2)";]
Pf3D7_08_v3	1311810	1311811	Pf3D7_08_v3-1311810-1311811	1	+	[ID=PF3D7_0830800;feature=gene;description="surface-associated'+interspersed'+protein'+8.2'+(SURFIN'+8.2)";]
Pf3D7_08_v3	1311821	1311822	Pf3D7_08_v3-1311821-1311822	1	+	[ID=PF3D7_0830800;feature=gene;description="surface-associated'+interspersed'+protein'+8.2'+(SURFIN'+8.2)";]
Pf3D7_08_v3	1311835	1311836	Pf3D7_08_v3-1311835-1311836	1	+	[ID=PF3D7_0830800;feature=gene;description="surface-associated'+interspersed'+protein'+8.2'+(SURFIN'+8.2)";]
Pf3D7_08_v3	1311838	1311839	Pf3D7_08_v3-1311838-1311839	1	+	[ID=PF3D7_0830800;feature=gene;description="surface-associated'+interspersed'+protein'+8.2'+(SURFIN'+8.2)";]
Pf3D7_08_v3	1311848	1311849	Pf3D7_08_v3-1311848-1311849	1	+	[ID=PF3D7_0830800;feature=gene;description="surface-associated'+interspersed'+protein'+8.2'+(SURFIN'+8.2)";]
Pf3D7_08_v3	1311862	1311863	Pf3D7_08_v3-1311862-1311863	1	+	[ID=PF3D7_0830800;feature=gene;description="surface-associated'+interspersed'+protein'+8.2'+(SURFIN'+8.2)";]
Pf3D7_08_v3	1311866	1311867	Pf3D7_08_v3-1311866-1311867	1	+	[ID=PF3D7_0830800;feature=gene;description="surface-associated'+interspersed'+protein'+8.2'+(SURFIN'+8.2)";]
Pf3D7_08_v3	1311873	1311874	Pf3D7_08_v3-1311873-1311874	1	+	[ID=PF3D7_0830800;feature=gene;description="surface-associated'+interspersed'+protein'+8.2'+(SURFIN'+8.2)";]
Pf3D7_08_v3	1311874	1311875	Pf3D7_08_v3-1311874-1311875	1	+	[ID=PF3D7_0830800;feature=gene;description="surface-associated'+interspersed'+protein'+8.2'+(SURFIN'+8.2)";]
Pf3D7_08_v3	1311880	1311881	Pf3D7_08_v3-1311880-1311881	1	+	[ID=PF3D7_0830800;feature=gene;description="surface-associated'+interspersed'+protein'+8.2'+(SURFIN'+8.2)";]
Pf3D7_08_v3	1311881	1311882	Pf3D7_08_v3-1311881-1311882	1	+	[ID=PF3D7_0830800;feature=gene;description="surface-associated'+interspersed'+protein'+8.2'+(SURFIN'+8.2)";]
Pf3D7_08_v3	1311897	1311898	Pf3D7_08_v3-1311897-1311898	1	+	[ID=PF3D7_0830800;feature=gene;description="surface-associated'+interspersed'+protein'+8.2'+(SURFIN'+8.2)";]
Pf3D7_08_v3	1311900	1311901	Pf3D7_08_v3-1311900-1311901	1	+	[ID=PF3D7_0830800;feature=gene;description="surface-associated'+interspersed'+protein'+8.2'+(SURFIN'+8.2)";]
Pf3D7_08_v3	1311901	1311902	Pf3D7_08_v3-1311901-1311902	1	+	[ID=PF3D7_0830800;feature=gene;description="surface-associated'+interspersed'+protein'+8.2'+(SURFIN'+8.2)";]
Pf3D7_08_v3	1311903	1311904	Pf3D7_08_v3-1311903-1311904	1	+	[ID=PF3D7_0830800;feature=gene;description="surface-associated'+interspersed'+protein'+8.2'+(SURFIN'+8.2)";]
Pf3D7_08_v3	1311905	1311906	Pf3D7_08_v3-1311905-1311906	1	+	[ID=PF3D7_0830800;feature=gene;description="surface-associated'+interspersed'+protein'+8.2'+(SURFIN'+8.2)";]
Pf3D7_08_v3	1311907	1311908	Pf3D7_08_v3-1311907-1311908	1	+	[ID=PF3D7_0830800;feature=gene;description="surface-associated'+interspersed'+protein'+8.2'+(SURFIN'+8.2)";]
Pf3D7_08_v3	1311909	1311910	Pf3D7_08_v3-1311909-1311910	1	+	[ID=PF3D7_0830800;feature=gene;description="surface-associated'+interspersed'+protein'+8.2'+(SURFIN'+8.2)";]
Pf3D7_08_v3	1311912	1311913	Pf3D7_08_v3-1311912-1311913	1	+	[ID=PF3D7_0830800;feature=gene;description="surface-associated'+interspersed'+protein'+8.2'+(SURFIN'+8.2)";]
Pf3D7_08_v3	1311926	1311927	Pf3D7_08_v3-1311926-1311927	1	+	[ID=PF3D7_0830800;feature=gene;description="surface-associated'+interspersed'+protein'+8.2'+(SURFIN'+8.2)";]
Pf3D7_08_v3	1311937	1311938	Pf3D7_08_v3-1311937-1311938	1	+	[ID=PF3D7_0830800;feature=gene;description="surface-associated'+interspersed'+protein'+8.2'+(SURFIN'+8.2)";]
Pf3D7_08_v3	1311944	1311945	Pf3D7_08_v3-1311944-1311945	1	+	[ID=PF3D7_0830800;feature=gene;description="surface-associated'+interspersed'+protein'+8.2'+(SURFIN'+8.2)";]
Pf3D7_08_v3	1311948	1311949	Pf3D7_08_v3-1311948-1311949	1	+	[ID=PF3D7_0830800;feature=gene;description="surface-associated'+interspersed'+protein'+8.2'+(SURFIN'+8.2)";]
Pf3D7_08_v3	1311957	1311958	Pf3D7_08_v3-1311957-1311958	1	+	[ID=PF3D7_0830800;feature=gene;description="surface-associated'+interspersed'+protein'+8.2'+(SURFIN'+8.2)";]
Pf3D7_08_v3	1311958	1311959	Pf3D7_08_v3-1311958-1311959	1	+	[ID=PF3D7_0830800;feature=gene;description="surface-associated'+interspersed'+protein'+8.2'+(SURFIN'+8.2)";]
Pf3D7_08_v3	1311963	1311964	Pf3D7_08_v3-1311963-1311964	1	+	[ID=PF3D7_0830800;feature=gene;description="surface-associated'+interspersed'+protein'+8.2'+(SURFIN'+8.2)";]
Pf3D7_08_v3	1311964	1311965	Pf3D7_08_v3-1311964-1311965	1	+	[ID=PF3D7_0830800;feature=gene;description="surface-associated'+interspersed'+protein'+8.2'+(SURFIN'+8.2)";]
Pf3D7_08_v3	1312000	1312001	Pf3D7_08_v3-1312000-1312001	1	+	[ID=PF3D7_0830800;feature=gene;description="surface-associated'+interspersed'+protein'+8.2'+(SURFIN'+8.2)";]
Pf3D7_08_v3	1312001	1312002	Pf3D7_08_v3-1312001-1312002	1	+	[ID=PF3D7_0830800;feature=gene;description="surface-associated'+interspersed'+protein'+8.2'+(SURFIN'+8.2)";]
Pf3D7_08_v3	1312002	1312003	Pf3D7_08_v3-1312002-1312003	1	+	[ID=PF3D7_0830800;feature=gene;description="surface-associated'+interspersed'+protein'+8.2'+(SURFIN'+8.2)";]
Pf3D7_08_v3	1312003	1312004	Pf3D7_08_v3-1312003-1312004	1	+	[ID=PF3D7_0830800;feature=gene;description="surface-associated'+interspersed'+protein'+8.2'+(SURFIN'+8.2)";]
Pf3D7_08_v3	1312011	1312012	Pf3D7_08_v3-1312011-1312012	1	+	[ID=PF3D7_0830800;feature=gene;description="surface-associated'+interspersed'+protein'+8.2'+(SURFIN'+8.2)";]
Pf3D7_08_v3	1312024	1312025	Pf3D7_08_v3-1312024-1312025	1	+	[ID=PF3D7_0830800;feature=gene;description="surface-associated'+interspersed'+protein'+8.2'+(SURFIN'+8.2)";]
Pf3D7_08_v3	1312026	1312027	Pf3D7_08_v3-1312026-1312027	1	+	[ID=PF3D7_0830800;feature=gene;description="surface-associated'+interspersed'+protein'+8.2'+(SURFIN'+8.2)";]
Pf3D7_08_v3	1312034	1312035	Pf3D7_08_v3-1312034-1312035	1	+	[ID=PF3D7_0830800;feature=gene;description="surface-associated'+interspersed'+protein'+8.2'+(SURFIN'+8.2)";]
Pf3D7_08_v3	1312035	1312036	Pf3D7_08_v3-1312035-1312036	1	+	[ID=PF3D7_0830800;feature=gene;description="surface-associated'+interspersed'+protein'+8.2'+(SURFIN'+8.2)";]
Pf3D7_08_v3	1312044	1312045	Pf3D7_08_v3-1312044-1312045	1	+	[ID=PF3D7_0830800;feature=gene;description="surface-associated'+interspersed'+protein'+8.2'+(SURFIN'+8.2)";]
Pf3D7_08_v3	1312054	1312055	Pf3D7_08_v3-1312054-1312055	1	+	[ID=PF3D7_0830800;feature=gene;description="surface-associated'+interspersed'+protein'+8.2'+(SURFIN'+8.2)";]
Pf3D7_08_v3	1312068	1312069	Pf3D7_08_v3-1312068-1312069	1	+	[ID=PF3D7_0830800;feature=gene;description="surface-associated'+interspersed'+protein'+8.2'+(SURFIN'+8.2)";]
Pf3D7_08_v3	1312073	1312074	Pf3D7_08_v3-1312073-1312074	1	+	[ID=PF3D7_0830800;feature=gene;description="surface-associated'+interspersed'+protein'+8.2'+(SURFIN'+8.2)";]
Pf3D7_08_v3	1312076	1312077	Pf3D7_08_v3-1312076-1312077	1	+	[ID=PF3D7_0830800;feature=gene;description="surface-associated'+interspersed'+protein'+8.2'+(SURFIN'+8.2)";]
Pf3D7_08_v3	1312078	1312079	Pf3D7_08_v3-1312078-1312079	1	+	[ID=PF3D7_0830800;feature=gene;description="surface-associated'+interspersed'+protein'+8.2'+(SURFIN'+8.2)";]
Pf3D7_08_v3	1312083	1312084	Pf3D7_08_v3-1312083-1312084	1	+	[ID=PF3D7_0830800;feature=gene;description="surface-associated'+interspersed'+protein'+8.2'+(SURFIN'+8.2)";]
Pf3D7_08_v3	1312087	1312088	Pf3D7_08_v3-1312087-1312088	1	+	[ID=PF3D7_0830800;feature=gene;description="surface-associated'+interspersed'+protein'+8.2'+(SURFIN'+8.2)";]
Pf3D7_08_v3	1312091	1312092	Pf3D7_08_v3-1312091-1312092	1	+	[ID=PF3D7_0830800;feature=gene;description="surface-associated'+interspersed'+protein'+8.2'+(SURFIN'+8.2)";]
Pf3D7_08_v3	1312092	1312093	Pf3D7_08_v3-1312092-1312093	1	+	[ID=PF3D7_0830800;feature=gene;description="surface-associated'+interspersed'+protein'+8.2'+(SURFIN'+8.2)";]
Pf3D7_08_v3	1312097	1312098	Pf3D7_08_v3-1312097-1312098	1	+	[ID=PF3D7_0830800;feature=gene;description="surface-associated'+interspersed'+protein'+8.2'+(SURFIN'+8.2)";]
Pf3D7_08_v3	1312104	1312105	Pf3D7_08_v3-1312104-1312105	1	+	[ID=PF3D7_0830800;feature=gene;description="surface-associated'+interspersed'+protein'+8.2'+(SURFIN'+8.2)";]
Pf3D7_08_v3	1312106	1312107	Pf3D7_08_v3-1312106-1312107	1	+	[ID=PF3D7_0830800;feature=gene;description="surface-associated'+interspersed'+protein'+8.2'+(SURFIN'+8.2)";]
Pf3D7_08_v3	1312116	1312117	Pf3D7_08_v3-1312116-1312117	1	+	[ID=PF3D7_0830800;feature=gene;description="surface-associated'+interspersed'+protein'+8.2'+(SURFIN'+8.2)";]
Pf3D7_08_v3	1312120	1312121	Pf3D7_08_v3-1312120-1312121	1	+	[ID=PF3D7_0830800;feature=gene;description="surface-associated'+interspersed'+protein'+8.2'+(SURFIN'+8.2)";]
Pf3D7_08_v3	1312122	1312123	Pf3D7_08_v3-1312122-1312123	1	+	[ID=PF3D7_0830800;feature=gene;description="surface-associated'+interspersed'+protein'+8.2'+(SURFIN'+8.2)";]
Pf3D7_08_v3	1312132	1312133	Pf3D7_08_v3-1312132-1312133	1	+	[ID=PF3D7_0830800;feature=gene;description="surface-associated'+interspersed'+protein'+8.2'+(SURFIN'+8.2)";]
Pf3D7_08_v3	1312139	1312140	Pf3D7_08_v3-1312139-1312140	1	+	[ID=PF3D7_0830800;feature=gene;description="surface-associated'+interspersed'+protein'+8.2'+(SURFIN'+8.2)";]
Pf3D7_08_v3	1312143	1312144	Pf3D7_08_v3-1312143-1312144	1	+	[ID=PF3D7_0830800;feature=gene;description="surface-associated'+interspersed'+protein'+8.2'+(SURFIN'+8.2)";]
Pf3D7_08_v3	1312146	1312147	Pf3D7_08_v3-1312146-1312147	1	+	[ID=PF3D7_0830800;feature=gene;description="surface-associated'+interspersed'+protein'+8.2'+(SURFIN'+8.2)";]
Pf3D7_08_v3	1312161	1312162	Pf3D7_08_v3-1312161-1312162	1	+	[ID=PF3D7_0830800;feature=gene;description="surface-associated'+interspersed'+protein'+8.2'+(SURFIN'+8.2)";]
Pf3D7_08_v3	1312163	1312164	Pf3D7_08_v3-1312163-1312164	1	+	[ID=PF3D7_0830800;feature=gene;description="surface-associated'+interspersed'+protein'+8.2'+(SURFIN'+8.2)";]
Pf3D7_08_v3	1312166	1312167	Pf3D7_08_v3-1312166-1312167	1	+	[ID=PF3D7_0830800;feature=gene;description="surface-associated'+interspersed'+protein'+8.2'+(SURFIN'+8.2)";]
Pf3D7_08_v3	1312167	1312168	Pf3D7_08_v3-1312167-1312168	1	+	[ID=PF3D7_0830800;feature=gene;description="surface-associated'+interspersed'+protein'+8.2'+(SURFIN'+8.2)";]
Pf3D7_08_v3	1312184	1312185	Pf3D7_08_v3-1312184-1312185	1	+	[ID=PF3D7_0830800;feature=gene;description="surface-associated'+interspersed'+protein'+8.2'+(SURFIN'+8.2)";]
Pf3D7_08_v3	1312186	1312187	Pf3D7_08_v3-1312186-1312187	1	+	[ID=PF3D7_0830800;feature=gene;description="surface-associated'+interspersed'+protein'+8.2'+(SURFIN'+8.2)";]
Pf3D7_08_v3	1312189	1312190	Pf3D7_08_v3-1312189-1312190	1	+	[ID=PF3D7_0830800;feature=gene;description="surface-associated'+interspersed'+protein'+8.2'+(SURFIN'+8.2)";]
Pf3D7_08_v3	1312195	1312196	Pf3D7_08_v3-1312195-1312196	1	+	[ID=PF3D7_0830800;feature=gene;description="surface-associated'+interspersed'+protein'+8.2'+(SURFIN'+8.2)";]
Pf3D7_08_v3	1312197	1312198	Pf3D7_08_v3-1312197-1312198	1	+	[ID=PF3D7_0830800;feature=gene;description="surface-associated'+interspersed'+protein'+8.2'+(SURFIN'+8.2)";]
Pf3D7_08_v3	1312205	1312206	Pf3D7_08_v3-1312205-1312206	1	+	[ID=PF3D7_0830800;feature=gene;description="surface-associated'+interspersed'+protein'+8.2'+(SURFIN'+8.2)";]
Pf3D7_08_v3	1312206	1312207	Pf3D7_08_v3-1312206-1312207	1	+	[ID=PF3D7_0830800;feature=gene;description="surface-associated'+interspersed'+protein'+8.2'+(SURFIN'+8.2)";]
Pf3D7_08_v3	1312218	1312219	Pf3D7_08_v3-1312218-1312219	1	+	[ID=PF3D7_0830800;feature=gene;description="surface-associated'+interspersed'+protein'+8.2'+(SURFIN'+8.2)";]
Pf3D7_08_v3	1312228	1312229	Pf3D7_08_v3-1312228-1312229	1	+	[ID=PF3D7_0830800;feature=gene;description="surface-associated'+interspersed'+protein'+8.2'+(SURFIN'+8.2)";]
Pf3D7_08_v3	1312243	1312244	Pf3D7_08_v3-1312243-1312244	1	+	[ID=PF3D7_0830800;feature=gene;description="surface-associated'+interspersed'+protein'+8.2'+(SURFIN'+8.2)";]
Pf3D7_08_v3	1312247	1312248	Pf3D7_08_v3-1312247-1312248	1	+	[ID=PF3D7_0830800;feature=gene;description="surface-associated'+interspersed'+protein'+8.2'+(SURFIN'+8.2)";]
Pf3D7_08_v3	1312251	1312252	Pf3D7_08_v3-1312251-1312252	1	+	[ID=PF3D7_0830800;feature=gene;description="surface-associated'+interspersed'+protein'+8.2'+(SURFIN'+8.2)";]
Pf3D7_08_v3	1312324	1312325	Pf3D7_08_v3-1312324-1312325	1	+	[ID=PF3D7_0830800;feature=gene;description="surface-associated'+interspersed'+protein'+8.2'+(SURFIN'+8.2)";]
Pf3D7_08_v3	1312619	1312620	Pf3D7_08_v3-1312619-1312620	1	+	[ID=PF3D7_0830800;feature=gene;description="surface-associated'+interspersed'+protein'+8.2'+(SURFIN'+8.2)";]
Pf3D7_08_v3	1312624	1312625	Pf3D7_08_v3-1312624-1312625	1	+	[ID=PF3D7_0830800;feature=gene;description="surface-associated'+interspersed'+protein'+8.2'+(SURFIN'+8.2)";]
Pf3D7_08_v3	1312651	1312652	Pf3D7_08_v3-1312651-1312652	1	+	[ID=PF3D7_0830800;feature=gene;description="surface-associated'+interspersed'+protein'+8.2'+(SURFIN'+8.2)";]
Pf3D7_08_v3	1312686	1312687	Pf3D7_08_v3-1312686-1312687	1	+	[ID=PF3D7_0830800;feature=gene;description="surface-associated'+interspersed'+protein'+8.2'+(SURFIN'+8.2)";]
Pf3D7_08_v3	1312698	1312699	Pf3D7_08_v3-1312698-1312699	1	+	[ID=PF3D7_0830800;feature=gene;description="surface-associated'+interspersed'+protein'+8.2'+(SURFIN'+8.2)";]
Pf3D7_08_v3	1312752	1312753	Pf3D7_08_v3-1312752-1312753	1	+	[ID=PF3D7_0830800;feature=gene;description="surface-associated'+interspersed'+protein'+8.2'+(SURFIN'+8.2)";]
Pf3D7_08_v3	1313201	1313202	Pf3D7_08_v3-1313201-1313202	1	+	[ID=PF3D7_0830800;feature=gene;description="surface-associated'+interspersed'+protein'+8.2'+(SURFIN'+8.2)";]
Pf3D7_08_v3	1313208	1313209	Pf3D7_08_v3-1313208-1313209	1	+	[ID=PF3D7_0830800;feature=gene;description="surface-associated'+interspersed'+protein'+8.2'+(SURFIN'+8.2)";]
Pf3D7_08_v3	1313214	1313215	Pf3D7_08_v3-1313214-1313215	1	+	[ID=PF3D7_0830800;feature=gene;description="surface-associated'+interspersed'+protein'+8.2'+(SURFIN'+8.2)";]
Pf3D7_08_v3	1313603	1313604	Pf3D7_08_v3-1313603-1313604	1	+	[ID=PF3D7_0830800;feature=gene;description="surface-associated'+interspersed'+protein'+8.2'+(SURFIN'+8.2)";]
Pf3D7_08_v3	1313795	1313796	Pf3D7_08_v3-1313795-1313796	1	+	[ID=PF3D7_0830800;feature=gene;description="surface-associated'+interspersed'+protein'+8.2'+(SURFIN'+8.2)";]
Pf3D7_08_v3	1314032	1314033	Pf3D7_08_v3-1314032-1314033	1	+	[ID=PF3D7_0830800;feature=gene;description="surface-associated'+interspersed'+protein'+8.2'+(SURFIN'+8.2)";]
Pf3D7_08_v3	1314409	1314410	Pf3D7_08_v3-1314409-1314410	1	+	[ID=PF3D7_0830800;feature=gene;description="surface-associated'+interspersed'+protein'+8.2'+(SURFIN'+8.2)";]
Pf3D7_08_v3	1314413	1314414	Pf3D7_08_v3-1314413-1314414	1	+	[ID=PF3D7_0830800;feature=gene;description="surface-associated'+interspersed'+protein'+8.2'+(SURFIN'+8.2)";]
Pf3D7_08_v3	1314470	1314471	Pf3D7_08_v3-1314470-1314471	1	+	[ID=PF3D7_0830800;feature=gene;description="surface-associated'+interspersed'+protein'+8.2'+(SURFIN'+8.2)";]
Pf3D7_08_v3	1314648	1314649	Pf3D7_08_v3-1314648-1314649	1	+	[ID=PF3D7_0830800;feature=gene;description="surface-associated'+interspersed'+protein'+8.2'+(SURFIN'+8.2)";]
Pf3D7_08_v3	1314708	1314709	Pf3D7_08_v3-1314708-1314709	1	+	[ID=PF3D7_0830800;feature=gene;description="surface-associated'+interspersed'+protein'+8.2'+(SURFIN'+8.2)";]
Pf3D7_08_v3	1314783	1314784	Pf3D7_08_v3-1314783-1314784	1	+	[ID=PF3D7_0830800;feature=gene;description="surface-associated'+interspersed'+protein'+8.2'+(SURFIN'+8.2)";]
Pf3D7_08_v3	1314830	1314831	Pf3D7_08_v3-1314830-1314831	1	+	[ID=PF3D7_0830800;feature=gene;description="surface-associated'+interspersed'+protein'+8.2'+(SURFIN'+8.2)";]
Pf3D7_08_v3	1314881	1314882	Pf3D7_08_v3-1314881-1314882	1	+	[ID=PF3D7_0830800;feature=gene;description="surface-associated'+interspersed'+protein'+8.2'+(SURFIN'+8.2)";]
Pf3D7_08_v3	1315034	1315035	Pf3D7_08_v3-1315034-1315035	1	+	[ID=PF3D7_0830800;feature=gene;description="surface-associated'+interspersed'+protein'+8.2'+(SURFIN'+8.2)";]
Pf3D7_08_v3	1315040	1315041	Pf3D7_08_v3-1315040-1315041	1	+	[ID=PF3D7_0830800;feature=gene;description="surface-associated'+interspersed'+protein'+8.2'+(SURFIN'+8.2)";]
Pf3D7_08_v3	1315286	1315287	Pf3D7_08_v3-1315286-1315287	1	+	[ID=PF3D7_0830800;feature=gene;description="surface-associated'+interspersed'+protein'+8.2'+(SURFIN'+8.2)";]
Pf3D7_08_v3	1315337	1315338	Pf3D7_08_v3-1315337-1315338	1	+	[ID=PF3D7_0830800;feature=gene;description="surface-associated'+interspersed'+protein'+8.2'+(SURFIN'+8.2)";]
Pf3D7_08_v3	1315501	1315502	Pf3D7_08_v3-1315501-1315502	1	+	[ID=PF3D7_0830800;feature=gene;description="surface-associated'+interspersed'+protein'+8.2'+(SURFIN'+8.2)";]
Pf3D7_08_v3	1315567	1315568	Pf3D7_08_v3-1315567-1315568	1	+	[ID=PF3D7_0830800;feature=gene;description="surface-associated'+interspersed'+protein'+8.2'+(SURFIN'+8.2)";]
Pf3D7_08_v3	1315694	1315695	Pf3D7_08_v3-1315694-1315695	1	+	[ID=PF3D7_0830800;feature=gene;description="surface-associated'+interspersed'+protein'+8.2'+(SURFIN'+8.2)";]
Pf3D7_08_v3	1315700	1315701	Pf3D7_08_v3-1315700-1315701	1	+	[ID=PF3D7_0830800;feature=gene;description="surface-associated'+interspersed'+protein'+8.2'+(SURFIN'+8.2)";]
Pf3D7_08_v3	1315810	1315811	Pf3D7_08_v3-1315810-1315811	1	+	[ID=PF3D7_0830800;feature=gene;description="surface-associated'+interspersed'+protein'+8.2'+(SURFIN'+8.2)";]
Pf3D7_08_v3	1315883	1315884	Pf3D7_08_v3-1315883-1315884	1	+	[ID=PF3D7_0830800;feature=gene;description="surface-associated'+interspersed'+protein'+8.2'+(SURFIN'+8.2)";]
Pf3D7_08_v3	1316094	1316095	Pf3D7_08_v3-1316094-1316095	1	+	[ID=PF3D7_0830800;feature=gene;description="surface-associated'+interspersed'+protein'+8.2'+(SURFIN'+8.2)";]
Pf3D7_08_v3	1316144	1316145	Pf3D7_08_v3-1316144-1316145	1	+	[ID=PF3D7_0830800;feature=gene;description="surface-associated'+interspersed'+protein'+8.2'+(SURFIN'+8.2)";]
Pf3D7_08_v3	1316180	1316181	Pf3D7_08_v3-1316180-1316181	1	+	[ID=PF3D7_0830800;feature=gene;description="surface-associated'+interspersed'+protein'+8.2'+(SURFIN'+8.2)";]
Pf3D7_08_v3	1316221	1316222	Pf3D7_08_v3-1316221-1316222	1	+	[ID=PF3D7_0830800;feature=gene;description="surface-associated'+interspersed'+protein'+8.2'+(SURFIN'+8.2)";]
Pf3D7_08_v3	1316717	1316718	Pf3D7_08_v3-1316717-1316718	1	+	[ID=PF3D7_0830800;feature=gene;description="surface-associated'+interspersed'+protein'+8.2'+(SURFIN'+8.2)";]
Pf3D7_08_v3	1316776	1316777	Pf3D7_08_v3-1316776-1316777	1	+	[ID=PF3D7_0830800;feature=gene;description="surface-associated'+interspersed'+protein'+8.2'+(SURFIN'+8.2)";]
Pf3D7_08_v3	1316882	1316883	Pf3D7_08_v3-1316882-1316883	1	+	[ID=PF3D7_0830800;feature=gene;description="surface-associated'+interspersed'+protein'+8.2'+(SURFIN'+8.2)";]
Pf3D7_08_v3	1317070	1317071	Pf3D7_08_v3-1317070-1317071	1	+
Pf3D7_08_v3	1317145	1317146	Pf3D7_08_v3-1317145-1317146	1	+
Pf3D7_08_v3	1317619	1317620	Pf3D7_08_v3-1317619-1317620	1	+	[ID=PF3D7_0830900;feature=gene;description=Plasmodium exported protein, unknown function;]
Pf3D7_08_v3	1317739	1317740	Pf3D7_08_v3-1317739-1317740	1	+	[ID=PF3D7_0830900;feature=gene;description=Plasmodium exported protein, unknown function;]
Pf3D7_08_v3	1317877	1317878	Pf3D7_08_v3-1317877-1317878	1	+	[ID=PF3D7_0830900;feature=gene;description=Plasmodium exported protein, unknown function;]
Pf3D7_08_v3	1318056	1318057	Pf3D7_08_v3-1318056-1318057	1	+	[ID=PF3D7_0830900;feature=gene;description=Plasmodium exported protein, unknown function;]
Pf3D7_08_v3	1318078	1318079	Pf3D7_08_v3-1318078-1318079	1	+	[ID=PF3D7_0830900;feature=gene;description=Plasmodium exported protein, unknown function;]
Pf3D7_08_v3	1318107	1318108	Pf3D7_08_v3-1318107-1318108	1	+	[ID=PF3D7_0830900;feature=gene;description=Plasmodium exported protein, unknown function;]
Pf3D7_08_v3	1320947	1320948	Pf3D7_08_v3-1320947-1320948	1	+
Pf3D7_08_v3	1321027	1321028	Pf3D7_08_v3-1321027-1321028	1	+
Pf3D7_08_v3	1321399	1321400	Pf3D7_08_v3-1321399-1321400	1	+
Pf3D7_08_v3	1321525	1321526	Pf3D7_08_v3-1321525-1321526	1	+	[ID=PF3D7_0831000;feature=gene;description="Plasmodium exported protein (PHISTb), unknown function";]
Pf3D7_08_v3	1321929	1321930	Pf3D7_08_v3-1321929-1321930	1	+	[ID=PF3D7_0831000;feature=gene;description="Plasmodium exported protein (PHISTb), unknown function";]
Pf3D7_08_v3	1322139	1322140	Pf3D7_08_v3-1322139-1322140	1	+	[ID=PF3D7_0831000;feature=gene;description="Plasmodium exported protein (PHISTb), unknown function";]
Pf3D7_08_v3	1322560	1322561	Pf3D7_08_v3-1322560-1322561	1	+	[ID=PF3D7_0831000;feature=gene;description="Plasmodium exported protein (PHISTb), unknown function";]
Pf3D7_08_v3	1323193	1323194	Pf3D7_08_v3-1323193-1323194	1	+
Pf3D7_08_v3	1323655	1323656	Pf3D7_08_v3-1323655-1323656	1	+
Pf3D7_08_v3	1325145	1325146	Pf3D7_08_v3-1325145-1325146	1	+	[ID=PF3D7_0831100;feature=gene;description="surface-associated'+interspersed'+protein'+8.1'+(SURFIN'+8.1)";]
Pf3D7_08_v3	1325176	1325177	Pf3D7_08_v3-1325176-1325177	1	+	[ID=PF3D7_0831100;feature=gene;description="surface-associated'+interspersed'+protein'+8.1'+(SURFIN'+8.1)";]
Pf3D7_08_v3	1325186	1325187	Pf3D7_08_v3-1325186-1325187	1	+	[ID=PF3D7_0831100;feature=gene;description="surface-associated'+interspersed'+protein'+8.1'+(SURFIN'+8.1)";]
Pf3D7_08_v3	1325197	1325198	Pf3D7_08_v3-1325197-1325198	1	+	[ID=PF3D7_0831100;feature=gene;description="surface-associated'+interspersed'+protein'+8.1'+(SURFIN'+8.1)";]
Pf3D7_08_v3	1325222	1325223	Pf3D7_08_v3-1325222-1325223	1	+	[ID=PF3D7_0831100;feature=gene;description="surface-associated'+interspersed'+protein'+8.1'+(SURFIN'+8.1)";]
Pf3D7_08_v3	1325235	1325236	Pf3D7_08_v3-1325235-1325236	1	+	[ID=PF3D7_0831100;feature=gene;description="surface-associated'+interspersed'+protein'+8.1'+(SURFIN'+8.1)";]
Pf3D7_08_v3	1325237	1325238	Pf3D7_08_v3-1325237-1325238	1	+	[ID=PF3D7_0831100;feature=gene;description="surface-associated'+interspersed'+protein'+8.1'+(SURFIN'+8.1)";]
Pf3D7_08_v3	1325312	1325313	Pf3D7_08_v3-1325312-1325313	1	+	[ID=PF3D7_0831100;feature=gene;description="surface-associated'+interspersed'+protein'+8.1'+(SURFIN'+8.1)";]
Pf3D7_08_v3	1325395	1325396	Pf3D7_08_v3-1325395-1325396	1	+	[ID=PF3D7_0831100;feature=gene;description="surface-associated'+interspersed'+protein'+8.1'+(SURFIN'+8.1)";]
Pf3D7_08_v3	1325669	1325670	Pf3D7_08_v3-1325669-1325670	1	+	[ID=PF3D7_0831100;feature=gene;description="surface-associated'+interspersed'+protein'+8.1'+(SURFIN'+8.1)";]
Pf3D7_08_v3	1325716	1325717	Pf3D7_08_v3-1325716-1325717	1	+	[ID=PF3D7_0831100;feature=gene;description="surface-associated'+interspersed'+protein'+8.1'+(SURFIN'+8.1)";]
Pf3D7_08_v3	1325831	1325832	Pf3D7_08_v3-1325831-1325832	1	+	[ID=PF3D7_0831100;feature=gene;description="surface-associated'+interspersed'+protein'+8.1'+(SURFIN'+8.1)";]
Pf3D7_08_v3	1325876	1325877	Pf3D7_08_v3-1325876-1325877	1	+	[ID=PF3D7_0831100;feature=gene;description="surface-associated'+interspersed'+protein'+8.1'+(SURFIN'+8.1)";]
Pf3D7_08_v3	1325884	1325885	Pf3D7_08_v3-1325884-1325885	1	+	[ID=PF3D7_0831100;feature=gene;description="surface-associated'+interspersed'+protein'+8.1'+(SURFIN'+8.1)";]
Pf3D7_08_v3	1325890	1325891	Pf3D7_08_v3-1325890-1325891	1	+	[ID=PF3D7_0831100;feature=gene;description="surface-associated'+interspersed'+protein'+8.1'+(SURFIN'+8.1)";]
Pf3D7_08_v3	1325903	1325904	Pf3D7_08_v3-1325903-1325904	1	+	[ID=PF3D7_0831100;feature=gene;description="surface-associated'+interspersed'+protein'+8.1'+(SURFIN'+8.1)";]
Pf3D7_08_v3	1325909	1325910	Pf3D7_08_v3-1325909-1325910	1	+	[ID=PF3D7_0831100;feature=gene;description="surface-associated'+interspersed'+protein'+8.1'+(SURFIN'+8.1)";]
Pf3D7_08_v3	1325918	1325919	Pf3D7_08_v3-1325918-1325919	1	+	[ID=PF3D7_0831100;feature=gene;description="surface-associated'+interspersed'+protein'+8.1'+(SURFIN'+8.1)";]
Pf3D7_08_v3	1325959	1325960	Pf3D7_08_v3-1325959-1325960	1	+	[ID=PF3D7_0831100;feature=gene;description="surface-associated'+interspersed'+protein'+8.1'+(SURFIN'+8.1)";]
Pf3D7_08_v3	1325972	1325973	Pf3D7_08_v3-1325972-1325973	1	+	[ID=PF3D7_0831100;feature=gene;description="surface-associated'+interspersed'+protein'+8.1'+(SURFIN'+8.1)";]
Pf3D7_08_v3	1325975	1325976	Pf3D7_08_v3-1325975-1325976	1	+	[ID=PF3D7_0831100;feature=gene;description="surface-associated'+interspersed'+protein'+8.1'+(SURFIN'+8.1)";]
Pf3D7_08_v3	1325983	1325984	Pf3D7_08_v3-1325983-1325984	1	+	[ID=PF3D7_0831100;feature=gene;description="surface-associated'+interspersed'+protein'+8.1'+(SURFIN'+8.1)";]
Pf3D7_08_v3	1325984	1325985	Pf3D7_08_v3-1325984-1325985	1	+	[ID=PF3D7_0831100;feature=gene;description="surface-associated'+interspersed'+protein'+8.1'+(SURFIN'+8.1)";]
Pf3D7_08_v3	1325986	1325987	Pf3D7_08_v3-1325986-1325987	1	+	[ID=PF3D7_0831100;feature=gene;description="surface-associated'+interspersed'+protein'+8.1'+(SURFIN'+8.1)";]
Pf3D7_08_v3	1325993	1325994	Pf3D7_08_v3-1325993-1325994	1	+	[ID=PF3D7_0831100;feature=gene;description="surface-associated'+interspersed'+protein'+8.1'+(SURFIN'+8.1)";]
Pf3D7_08_v3	1326007	1326008	Pf3D7_08_v3-1326007-1326008	1	+	[ID=PF3D7_0831100;feature=gene;description="surface-associated'+interspersed'+protein'+8.1'+(SURFIN'+8.1)";]
Pf3D7_08_v3	1326162	1326163	Pf3D7_08_v3-1326162-1326163	1	+	[ID=PF3D7_0831100;feature=gene;description="surface-associated'+interspersed'+protein'+8.1'+(SURFIN'+8.1)";]
Pf3D7_08_v3	1326176	1326177	Pf3D7_08_v3-1326176-1326177	1	+	[ID=PF3D7_0831100;feature=gene;description="surface-associated'+interspersed'+protein'+8.1'+(SURFIN'+8.1)";]
Pf3D7_08_v3	1326188	1326189	Pf3D7_08_v3-1326188-1326189	1	+	[ID=PF3D7_0831100;feature=gene;description="surface-associated'+interspersed'+protein'+8.1'+(SURFIN'+8.1)";]
Pf3D7_08_v3	1326205	1326206	Pf3D7_08_v3-1326205-1326206	1	+	[ID=PF3D7_0831100;feature=gene;description="surface-associated'+interspersed'+protein'+8.1'+(SURFIN'+8.1)";]
Pf3D7_08_v3	1326216	1326217	Pf3D7_08_v3-1326216-1326217	1	+	[ID=PF3D7_0831100;feature=gene;description="surface-associated'+interspersed'+protein'+8.1'+(SURFIN'+8.1)";]
Pf3D7_08_v3	1326235	1326236	Pf3D7_08_v3-1326235-1326236	1	+	[ID=PF3D7_0831100;feature=gene;description="surface-associated'+interspersed'+protein'+8.1'+(SURFIN'+8.1)";]
Pf3D7_08_v3	1326241	1326242	Pf3D7_08_v3-1326241-1326242	1	+	[ID=PF3D7_0831100;feature=gene;description="surface-associated'+interspersed'+protein'+8.1'+(SURFIN'+8.1)";]
Pf3D7_08_v3	1326257	1326258	Pf3D7_08_v3-1326257-1326258	1	+	[ID=PF3D7_0831100;feature=gene;description="surface-associated'+interspersed'+protein'+8.1'+(SURFIN'+8.1)";]
Pf3D7_08_v3	1326261	1326262	Pf3D7_08_v3-1326261-1326262	1	+	[ID=PF3D7_0831100;feature=gene;description="surface-associated'+interspersed'+protein'+8.1'+(SURFIN'+8.1)";]
Pf3D7_08_v3	1326269	1326270	Pf3D7_08_v3-1326269-1326270	1	+	[ID=PF3D7_0831100;feature=gene;description="surface-associated'+interspersed'+protein'+8.1'+(SURFIN'+8.1)";]
Pf3D7_08_v3	1326406	1326407	Pf3D7_08_v3-1326406-1326407	1	+	[ID=PF3D7_0831100;feature=gene;description="surface-associated'+interspersed'+protein'+8.1'+(SURFIN'+8.1)";]
Pf3D7_08_v3	1330244	1330245	Pf3D7_08_v3-1330244-1330245	1	+	[ID=PF3D7_0831100;feature=gene;description="surface-associated'+interspersed'+protein'+8.1'+(SURFIN'+8.1)";]
Pf3D7_08_v3	1330341	1330342	Pf3D7_08_v3-1330341-1330342	1	+	[ID=PF3D7_0831100;feature=gene;description="surface-associated'+interspersed'+protein'+8.1'+(SURFIN'+8.1)";]
Pf3D7_08_v3	1331181	1331182	Pf3D7_08_v3-1331181-1331182	1	+	[ID=PF3D7_0831100;feature=gene;description="surface-associated'+interspersed'+protein'+8.1'+(SURFIN'+8.1)";]
Pf3D7_08_v3	1331542	1331543	Pf3D7_08_v3-1331542-1331543	1	+
Pf3D7_08_v3	1333121	1333122	Pf3D7_08_v3-1333121-1333122	1	+
Pf3D7_08_v3	1333205	1333206	Pf3D7_08_v3-1333205-1333206	1	+
Pf3D7_08_v3	1333554	1333555	Pf3D7_08_v3-1333554-1333555	1	+	[ID=PF3D7_0831200;feature=gene;description=DnaJ protein, putative;]
Pf3D7_08_v3	1334266	1334267	Pf3D7_08_v3-1334266-1334267	1	+	[ID=PF3D7_0831200;feature=gene;description=DnaJ protein, putative;]
Pf3D7_08_v3	1334442	1334443	Pf3D7_08_v3-1334442-1334443	1	+	[ID=PF3D7_0831200;feature=gene;description=DnaJ protein, putative;]
Pf3D7_08_v3	1335669	1335670	Pf3D7_08_v3-1335669-1335670	1	+	[ID=PF3D7_0831200;feature=gene;description=DnaJ protein, putative;]
Pf3D7_08_v3	1335776	1335777	Pf3D7_08_v3-1335776-1335777	1	+	[ID=PF3D7_0831200;feature=gene;description=DnaJ protein, putative;]
Pf3D7_08_v3	1335909	1335910	Pf3D7_08_v3-1335909-1335910	1	+	[ID=PF3D7_0831200;feature=gene;description=DnaJ protein, putative;]
Pf3D7_08_v3	1336254	1336255	Pf3D7_08_v3-1336254-1336255	1	+	[ID=PF3D7_0831200;feature=gene;description=DnaJ protein, putative;]
Pf3D7_08_v3	1336757	1336758	Pf3D7_08_v3-1336757-1336758	1	+
Pf3D7_08_v3	1337015	1337016	Pf3D7_08_v3-1337015-1337016	1	+
Pf3D7_08_v3	1337133	1337134	Pf3D7_08_v3-1337133-1337134	1	+
Pf3D7_08_v3	1337505	1337506	Pf3D7_08_v3-1337505-1337506	1	+
Pf3D7_08_v3	1337817	1337818	Pf3D7_08_v3-1337817-1337818	1	+
Pf3D7_08_v3	1338368	1338369	Pf3D7_08_v3-1338368-1338369	1	+
Pf3D7_08_v3	1338716	1338717	Pf3D7_08_v3-1338716-1338717	1	+
Pf3D7_08_v3	1339419	1339420	Pf3D7_08_v3-1339419-1339420	1	+
Pf3D7_08_v3	1340075	1340076	Pf3D7_08_v3-1340075-1340076	1	+	[ID=PF3D7_0831300;feature=gene;description=Plasmodium exported protein, unknown function;]
Pf3D7_08_v3	1340798	1340799	Pf3D7_08_v3-1340798-1340799	1	+	[ID=PF3D7_0831300;feature=gene;description=Plasmodium exported protein, unknown function;]
Pf3D7_08_v3	1341142	1341143	Pf3D7_08_v3-1341142-1341143	1	+	[ID=PF3D7_0831300;feature=gene;description=Plasmodium exported protein, unknown function;]
Pf3D7_08_v3	1341143	1341144	Pf3D7_08_v3-1341143-1341144	1	+	[ID=PF3D7_0831300;feature=gene;description=Plasmodium exported protein, unknown function;]
Pf3D7_08_v3	1341248	1341249	Pf3D7_08_v3-1341248-1341249	1	+	[ID=PF3D7_0831300;feature=gene;description=Plasmodium exported protein, unknown function;]
Pf3D7_08_v3	1341272	1341273	Pf3D7_08_v3-1341272-1341273	1	+	[ID=PF3D7_0831300;feature=gene;description=Plasmodium exported protein, unknown function;]
Pf3D7_08_v3	1341395	1341396	Pf3D7_08_v3-1341395-1341396	1	+	[ID=PF3D7_0831300;feature=gene;description=Plasmodium exported protein, unknown function;]
Pf3D7_08_v3	1341481	1341482	Pf3D7_08_v3-1341481-1341482	1	+	[ID=PF3D7_0831300;feature=gene;description=Plasmodium exported protein, unknown function;]
Pf3D7_08_v3	1341586	1341587	Pf3D7_08_v3-1341586-1341587	1	+	[ID=PF3D7_0831300;feature=gene;description=Plasmodium exported protein, unknown function;]
Pf3D7_08_v3	1341626	1341627	Pf3D7_08_v3-1341626-1341627	1	+	[ID=PF3D7_0831300;feature=gene;description=Plasmodium exported protein, unknown function;]
Pf3D7_08_v3	1342147	1342148	Pf3D7_08_v3-1342147-1342148	1	+	[ID=PF3D7_0831300;feature=gene;description=Plasmodium exported protein, unknown function;]
Pf3D7_08_v3	1342208	1342209	Pf3D7_08_v3-1342208-1342209	1	+	[ID=PF3D7_0831300;feature=gene;description=Plasmodium exported protein, unknown function;]
Pf3D7_08_v3	1342228	1342229	Pf3D7_08_v3-1342228-1342229	1	+	[ID=PF3D7_0831300;feature=gene;description=Plasmodium exported protein, unknown function;]
Pf3D7_08_v3	1342229	1342230	Pf3D7_08_v3-1342229-1342230	1	+	[ID=PF3D7_0831300;feature=gene;description=Plasmodium exported protein, unknown function;]
Pf3D7_08_v3	1342246	1342247	Pf3D7_08_v3-1342246-1342247	1	+	[ID=PF3D7_0831300;feature=gene;description=Plasmodium exported protein, unknown function;]
Pf3D7_08_v3	1343591	1343592	Pf3D7_08_v3-1343591-1343592	1	+
Pf3D7_08_v3	1343915	1343916	Pf3D7_08_v3-1343915-1343916	1	+
Pf3D7_08_v3	1343950	1343951	Pf3D7_08_v3-1343950-1343951	1	+
Pf3D7_08_v3	1344127	1344128	Pf3D7_08_v3-1344127-1344128	1	+
Pf3D7_08_v3	1344507	1344508	Pf3D7_08_v3-1344507-1344508	1	+	[ID=PF3D7_0831400;feature=gene;description=Plasmodium exported protein, unknown function;]
Pf3D7_08_v3	1344520	1344521	Pf3D7_08_v3-1344520-1344521	1	+	[ID=PF3D7_0831400;feature=gene;description=Plasmodium exported protein, unknown function;]
Pf3D7_08_v3	1344528	1344529	Pf3D7_08_v3-1344528-1344529	1	+	[ID=PF3D7_0831400;feature=gene;description=Plasmodium exported protein, unknown function;]
Pf3D7_08_v3	1344545	1344546	Pf3D7_08_v3-1344545-1344546	1	+	[ID=PF3D7_0831400;feature=gene;description=Plasmodium exported protein, unknown function;]
Pf3D7_08_v3	1344568	1344569	Pf3D7_08_v3-1344568-1344569	1	+	[ID=PF3D7_0831400;feature=gene;description=Plasmodium exported protein, unknown function;]
Pf3D7_08_v3	1344734	1344735	Pf3D7_08_v3-1344734-1344735	1	+	[ID=PF3D7_0831400;feature=gene;description=Plasmodium exported protein, unknown function;]
Pf3D7_08_v3	1344736	1344737	Pf3D7_08_v3-1344736-1344737	1	+	[ID=PF3D7_0831400;feature=gene;description=Plasmodium exported protein, unknown function;]
Pf3D7_08_v3	1344778	1344779	Pf3D7_08_v3-1344778-1344779	1	+	[ID=PF3D7_0831400;feature=gene;description=Plasmodium exported protein, unknown function;]
Pf3D7_08_v3	1345147	1345148	Pf3D7_08_v3-1345147-1345148	1	+	[ID=PF3D7_0831400;feature=gene;description=Plasmodium exported protein, unknown function;]
Pf3D7_08_v3	1346604	1346605	Pf3D7_08_v3-1346604-1346605	1	+
Pf3D7_08_v3	1347210	1347211	Pf3D7_08_v3-1347210-1347211	1	+
Pf3D7_08_v3	1347244	1347245	Pf3D7_08_v3-1347244-1347245	1	+
Pf3D7_08_v3	1347295	1347296	Pf3D7_08_v3-1347295-1347296	1	+
Pf3D7_08_v3	1347814	1347815	Pf3D7_08_v3-1347814-1347815	1	+
Pf3D7_08_v3	1347876	1347877	Pf3D7_08_v3-1347876-1347877	1	+
Pf3D7_08_v3	1348044	1348045	Pf3D7_08_v3-1348044-1348045	1	+
Pf3D7_08_v3	1348135	1348136	Pf3D7_08_v3-1348135-1348136	1	+
Pf3D7_08_v3	1348614	1348615	Pf3D7_08_v3-1348614-1348615	1	+
Pf3D7_08_v3	1349293	1349294	Pf3D7_08_v3-1349293-1349294	1	+
Pf3D7_08_v3	1349560	1349561	Pf3D7_08_v3-1349560-1349561	1	+
Pf3D7_08_v3	1349777	1349778	Pf3D7_08_v3-1349777-1349778	1	+
Pf3D7_08_v3	1350182	1350183	Pf3D7_08_v3-1350182-1350183	1	+
Pf3D7_08_v3	1350203	1350204	Pf3D7_08_v3-1350203-1350204	1	+
Pf3D7_08_v3	1351065	1351066	Pf3D7_08_v3-1351065-1351066	1	+
Pf3D7_08_v3	1351099	1351100	Pf3D7_08_v3-1351099-1351100	1	+
Pf3D7_08_v3	1351382	1351383	Pf3D7_08_v3-1351382-1351383	1	+
Pf3D7_08_v3	1351476	1351477	Pf3D7_08_v3-1351476-1351477	1	+
Pf3D7_08_v3	1352621	1352622	Pf3D7_08_v3-1352621-1352622	1	+
Pf3D7_08_v3	1352750	1352751	Pf3D7_08_v3-1352750-1352751	1	+
Pf3D7_08_v3	1353605	1353606	Pf3D7_08_v3-1353605-1353606	1	+	[ID=PF3D7_0831500;feature=gene;description="Plasmodium exported protein (PHIST), unknown function";]
Pf3D7_08_v3	1353612	1353613	Pf3D7_08_v3-1353612-1353613	1	+	[ID=PF3D7_0831500;feature=gene;description="Plasmodium exported protein (PHIST), unknown function";]
Pf3D7_08_v3	1353969	1353970	Pf3D7_08_v3-1353969-1353970	1	+	[ID=PF3D7_0831500;feature=gene;description="Plasmodium exported protein (PHIST), unknown function";]
Pf3D7_08_v3	1354183	1354184	Pf3D7_08_v3-1354183-1354184	1	+	[ID=PF3D7_0831500;feature=gene;description="Plasmodium exported protein (PHIST), unknown function";]
Pf3D7_08_v3	1354327	1354328	Pf3D7_08_v3-1354327-1354328	1	+	[ID=PF3D7_0831500;feature=gene;description="Plasmodium exported protein (PHIST), unknown function";]
Pf3D7_08_v3	1354426	1354427	Pf3D7_08_v3-1354426-1354427	1	+	[ID=PF3D7_0831500;feature=gene;description="Plasmodium exported protein (PHIST), unknown function";]
Pf3D7_08_v3	1354529	1354530	Pf3D7_08_v3-1354529-1354530	1	+	[ID=PF3D7_0831500;feature=gene;description="Plasmodium exported protein (PHIST), unknown function";]
Pf3D7_08_v3	1355307	1355308	Pf3D7_08_v3-1355307-1355308	1	+
Pf3D7_08_v3	1356042	1356043	Pf3D7_08_v3-1356042-1356043	1	+
Pf3D7_08_v3	1356247	1356248	Pf3D7_08_v3-1356247-1356248	1	+
Pf3D7_08_v3	1356273	1356274	Pf3D7_08_v3-1356273-1356274	1	+
Pf3D7_08_v3	1356913	1356914	Pf3D7_08_v3-1356913-1356914	1	+
Pf3D7_08_v3	1356925	1356926	Pf3D7_08_v3-1356925-1356926	1	+
Pf3D7_08_v3	1356984	1356985	Pf3D7_08_v3-1356984-1356985	1	+
Pf3D7_08_v3	1357395	1357396	Pf3D7_08_v3-1357395-1357396	1	+
Pf3D7_08_v3	1358249	1358250	Pf3D7_08_v3-1358249-1358250	1	+
Pf3D7_08_v3	1358623	1358624	Pf3D7_08_v3-1358623-1358624	1	+	[ID=PF3D7_0831600;feature=gene;description=cytoadherence'+linked'+asexual'+protein'+8;]
Pf3D7_08_v3	1358952	1358953	Pf3D7_08_v3-1358952-1358953	1	+	[ID=PF3D7_0831600;feature=gene;description=cytoadherence'+linked'+asexual'+protein'+8;]
Pf3D7_08_v3	1358970	1358971	Pf3D7_08_v3-1358970-1358971	1	+	[ID=PF3D7_0831600;feature=gene;description=cytoadherence'+linked'+asexual'+protein'+8;]
Pf3D7_08_v3	1359056	1359057	Pf3D7_08_v3-1359056-1359057	1	+	[ID=PF3D7_0831600;feature=gene;description=cytoadherence'+linked'+asexual'+protein'+8;]
Pf3D7_08_v3	1359736	1359737	Pf3D7_08_v3-1359736-1359737	1	+	[ID=PF3D7_0831600;feature=gene;description=cytoadherence'+linked'+asexual'+protein'+8;]
Pf3D7_08_v3	1359741	1359742	Pf3D7_08_v3-1359741-1359742	1	+	[ID=PF3D7_0831600;feature=gene;description=cytoadherence'+linked'+asexual'+protein'+8;]
Pf3D7_08_v3	1360177	1360178	Pf3D7_08_v3-1360177-1360178	1	+	[ID=PF3D7_0831600;feature=gene;description=cytoadherence'+linked'+asexual'+protein'+8;]
Pf3D7_08_v3	1360235	1360236	Pf3D7_08_v3-1360235-1360236	1	+	[ID=PF3D7_0831600;feature=gene;description=cytoadherence'+linked'+asexual'+protein'+8;]
Pf3D7_08_v3	1362900	1362901	Pf3D7_08_v3-1362900-1362901	1	+	[ID=PF3D7_0831600;feature=gene;description=cytoadherence'+linked'+asexual'+protein'+8;]
Pf3D7_08_v3	1362908	1362909	Pf3D7_08_v3-1362908-1362909	1	+	[ID=PF3D7_0831600;feature=gene;description=cytoadherence'+linked'+asexual'+protein'+8;]
Pf3D7_08_v3	1362913	1362914	Pf3D7_08_v3-1362913-1362914	1	+	[ID=PF3D7_0831600;feature=gene;description=cytoadherence'+linked'+asexual'+protein'+8;]
Pf3D7_08_v3	1362914	1362915	Pf3D7_08_v3-1362914-1362915	1	+	[ID=PF3D7_0831600;feature=gene;description=cytoadherence'+linked'+asexual'+protein'+8;]
Pf3D7_08_v3	1362915	1362916	Pf3D7_08_v3-1362915-1362916	1	+	[ID=PF3D7_0831600;feature=gene;description=cytoadherence'+linked'+asexual'+protein'+8;]
Pf3D7_08_v3	1362944	1362945	Pf3D7_08_v3-1362944-1362945	1	+	[ID=PF3D7_0831600;feature=gene;description=cytoadherence'+linked'+asexual'+protein'+8;]
Pf3D7_08_v3	1362946	1362947	Pf3D7_08_v3-1362946-1362947	1	+	[ID=PF3D7_0831600;feature=gene;description=cytoadherence'+linked'+asexual'+protein'+8;]
Pf3D7_08_v3	1362957	1362958	Pf3D7_08_v3-1362957-1362958	1	+	[ID=PF3D7_0831600;feature=gene;description=cytoadherence'+linked'+asexual'+protein'+8;]
Pf3D7_08_v3	1362972	1362973	Pf3D7_08_v3-1362972-1362973	1	+	[ID=PF3D7_0831600;feature=gene;description=cytoadherence'+linked'+asexual'+protein'+8;]
Pf3D7_08_v3	1363026	1363027	Pf3D7_08_v3-1363026-1363027	1	+	[ID=PF3D7_0831600;feature=gene;description=cytoadherence'+linked'+asexual'+protein'+8;]
Pf3D7_08_v3	1363047	1363048	Pf3D7_08_v3-1363047-1363048	1	+	[ID=PF3D7_0831600;feature=gene;description=cytoadherence'+linked'+asexual'+protein'+8;]
Pf3D7_08_v3	1364813	1364814	Pf3D7_08_v3-1364813-1364814	1	+
Pf3D7_08_v3	1364905	1364906	Pf3D7_08_v3-1364905-1364906	1	+
Pf3D7_08_v3	1365423	1365424	Pf3D7_08_v3-1365423-1365424	1	+
Pf3D7_08_v3	1365676	1365677	Pf3D7_08_v3-1365676-1365677	1	+	[ID=PF3D7_0831700;feature=gene;description=heat'+shock'+protein'+70;]
Pf3D7_08_v3	1365916	1365917	Pf3D7_08_v3-1365916-1365917	1	+	[ID=PF3D7_0831700;feature=gene;description=heat'+shock'+protein'+70;]
Pf3D7_08_v3	1366782	1366783	Pf3D7_08_v3-1366782-1366783	1	+	[ID=PF3D7_0831700;feature=gene;description=heat'+shock'+protein'+70;]
Pf3D7_08_v3	1367103	1367104	Pf3D7_08_v3-1367103-1367104	1	+	[ID=PF3D7_0831700;feature=gene;description=heat'+shock'+protein'+70;]
Pf3D7_08_v3	1367545	1367546	Pf3D7_08_v3-1367545-1367546	1	+
Pf3D7_08_v3	1368073	1368074	Pf3D7_08_v3-1368073-1368074	1	+
Pf3D7_08_v3	1369371	1369372	Pf3D7_08_v3-1369371-1369372	1	+
Pf3D7_08_v3	1369404	1369405	Pf3D7_08_v3-1369404-1369405	1	+
Pf3D7_08_v3	1369405	1369406	Pf3D7_08_v3-1369405-1369406	1	+
Pf3D7_08_v3	1369663	1369664	Pf3D7_08_v3-1369663-1369664	1	+
Pf3D7_08_v3	1369790	1369791	Pf3D7_08_v3-1369790-1369791	1	+
Pf3D7_08_v3	1371246	1371247	Pf3D7_08_v3-1371246-1371247	1	+
Pf3D7_08_v3	1371270	1371271	Pf3D7_08_v3-1371270-1371271	1	+
Pf3D7_08_v3	1371482	1371483	Pf3D7_08_v3-1371482-1371483	1	+
Pf3D7_08_v3	1371550	1371551	Pf3D7_08_v3-1371550-1371551	1	+
Pf3D7_08_v3	1371756	1371757	Pf3D7_08_v3-1371756-1371757	1	+
Pf3D7_08_v3	1372080	1372081	Pf3D7_08_v3-1372080-1372081	1	+	[ID=PF3D7_0831750;feature=gene;description="Plasmodium exported protein (PHISTa), unknown function, pseudogene";]
Pf3D7_08_v3	1372190	1372191	Pf3D7_08_v3-1372190-1372191	1	+	[ID=PF3D7_0831750;feature=gene;description="Plasmodium exported protein (PHISTa), unknown function, pseudogene";]
Pf3D7_08_v3	1372322	1372323	Pf3D7_08_v3-1372322-1372323	1	+	[ID=PF3D7_0831750;feature=gene;description="Plasmodium exported protein (PHISTa), unknown function, pseudogene";]
Pf3D7_08_v3	1372400	1372401	Pf3D7_08_v3-1372400-1372401	1	+	[ID=PF3D7_0831750;feature=gene;description="Plasmodium exported protein (PHISTa), unknown function, pseudogene";]
Pf3D7_08_v3	1372442	1372443	Pf3D7_08_v3-1372442-1372443	1	+	[ID=PF3D7_0831750;feature=gene;description="Plasmodium exported protein (PHISTa), unknown function, pseudogene";]
Pf3D7_08_v3	1372594	1372595	Pf3D7_08_v3-1372594-1372595	1	+	[ID=PF3D7_0831750;feature=gene;description="Plasmodium exported protein (PHISTa), unknown function, pseudogene";]
Pf3D7_08_v3	1372620	1372621	Pf3D7_08_v3-1372620-1372621	1	+	[ID=PF3D7_0831750;feature=gene;description="Plasmodium exported protein (PHISTa), unknown function, pseudogene";]
Pf3D7_08_v3	1372647	1372648	Pf3D7_08_v3-1372647-1372648	1	+	[ID=PF3D7_0831750;feature=gene;description="Plasmodium exported protein (PHISTa), unknown function, pseudogene";]
Pf3D7_08_v3	1374202	1374203	Pf3D7_08_v3-1374202-1374203	1	+
Pf3D7_08_v3	1375463	1375464	Pf3D7_08_v3-1375463-1375464	1	+
Pf3D7_08_v3	1378235	1378236	Pf3D7_08_v3-1378235-1378236	1	+
Pf3D7_08_v3	1378537	1378538	Pf3D7_08_v3-1378537-1378538	1	+
Pf3D7_08_v3	1379203	1379204	Pf3D7_08_v3-1379203-1379204	1	+
Pf3D7_08_v3	1379375	1379376	Pf3D7_08_v3-1379375-1379376	1	+
Pf3D7_08_v3	1379555	1379556	Pf3D7_08_v3-1379555-1379556	1	+
Pf3D7_08_v3	1379628	1379629	Pf3D7_08_v3-1379628-1379629	1	+
Pf3D7_08_v3	1379634	1379635	Pf3D7_08_v3-1379634-1379635	1	+
Pf3D7_08_v3	1379905	1379906	Pf3D7_08_v3-1379905-1379906	1	+
Pf3D7_08_v3	1382720	1382721	Pf3D7_08_v3-1382720-1382721	1	+
Pf3D7_08_v3	1382745	1382746	Pf3D7_08_v3-1382745-1382746	1	+
Pf3D7_08_v3	1382877	1382878	Pf3D7_08_v3-1382877-1382878	1	+
Pf3D7_08_v3	1382900	1382901	Pf3D7_08_v3-1382900-1382901	1	+
Pf3D7_08_v3	1382933	1382934	Pf3D7_08_v3-1382933-1382934	1	+
Pf3D7_08_v3	1383030	1383031	Pf3D7_08_v3-1383030-1383031	1	+
Pf3D7_08_v3	1383117	1383118	Pf3D7_08_v3-1383117-1383118	1	+
Pf3D7_08_v3	1383119	1383120	Pf3D7_08_v3-1383119-1383120	1	+
Pf3D7_08_v3	1384052	1384053	Pf3D7_08_v3-1384052-1384053	1	+	[ID=PF3D7_0832000;feature=gene;description=stevor;]
Pf3D7_08_v3	1384101	1384102	Pf3D7_08_v3-1384101-1384102	1	+	[ID=PF3D7_0832000;feature=gene;description=stevor;]
Pf3D7_08_v3	1384413	1384414	Pf3D7_08_v3-1384413-1384414	1	+
Pf3D7_08_v3	1384852	1384853	Pf3D7_08_v3-1384852-1384853	1	+
Pf3D7_08_v3	1384857	1384858	Pf3D7_08_v3-1384857-1384858	1	+
Pf3D7_08_v3	1384885	1384886	Pf3D7_08_v3-1384885-1384886	1	+
Pf3D7_08_v3	1384987	1384988	Pf3D7_08_v3-1384987-1384988	1	+
Pf3D7_08_v3	1385004	1385005	Pf3D7_08_v3-1385004-1385005	1	+
Pf3D7_08_v3	1385056	1385057	Pf3D7_08_v3-1385056-1385057	1	+
Pf3D7_08_v3	1385156	1385157	Pf3D7_08_v3-1385156-1385157	1	+
Pf3D7_08_v3	1385163	1385164	Pf3D7_08_v3-1385163-1385164	1	+
Pf3D7_08_v3	1385666	1385667	Pf3D7_08_v3-1385666-1385667	1	+
Pf3D7_08_v3	1385954	1385955	Pf3D7_08_v3-1385954-1385955	1	+
Pf3D7_08_v3	1385965	1385966	Pf3D7_08_v3-1385965-1385966	1	+
Pf3D7_08_v3	1386291	1386292	Pf3D7_08_v3-1386291-1386292	1	+
Pf3D7_08_v3	1386518	1386519	Pf3D7_08_v3-1386518-1386519	1	+
Pf3D7_08_v3	1386539	1386540	Pf3D7_08_v3-1386539-1386540	1	+
Pf3D7_08_v3	1386580	1386581	Pf3D7_08_v3-1386580-1386581	1	+
Pf3D7_08_v3	1386750	1386751	Pf3D7_08_v3-1386750-1386751	1	+	[ID=PF3D7_0832100;feature=gene;description=rifin, pseudogene;]
Pf3D7_08_v3	1386880	1386881	Pf3D7_08_v3-1386880-1386881	1	+	[ID=PF3D7_0832100;feature=gene;description=rifin, pseudogene;]
Pf3D7_08_v3	1386921	1386922	Pf3D7_08_v3-1386921-1386922	1	+	[ID=PF3D7_0832100;feature=gene;description=rifin, pseudogene;]
Pf3D7_08_v3	1387073	1387074	Pf3D7_08_v3-1387073-1387074	1	+	[ID=PF3D7_0832100;feature=gene;description=rifin, pseudogene;]
Pf3D7_08_v3	1387093	1387094	Pf3D7_08_v3-1387093-1387094	1	+	[ID=PF3D7_0832100;feature=gene;description=rifin, pseudogene;]
Pf3D7_08_v3	1387104	1387105	Pf3D7_08_v3-1387104-1387105	1	+	[ID=PF3D7_0832100;feature=gene;description=rifin, pseudogene;]
Pf3D7_08_v3	1387147	1387148	Pf3D7_08_v3-1387147-1387148	1	+	[ID=PF3D7_0832100;feature=gene;description=rifin, pseudogene;]
Pf3D7_08_v3	1387213	1387214	Pf3D7_08_v3-1387213-1387214	1	+	[ID=PF3D7_0832100;feature=gene;description=rifin, pseudogene;]
Pf3D7_08_v3	1387355	1387356	Pf3D7_08_v3-1387355-1387356	1	+	[ID=PF3D7_0832100;feature=gene;description=rifin, pseudogene;]
Pf3D7_08_v3	1387361	1387362	Pf3D7_08_v3-1387361-1387362	1	+	[ID=PF3D7_0832100;feature=gene;description=rifin, pseudogene;]
Pf3D7_08_v3	1387404	1387405	Pf3D7_08_v3-1387404-1387405	1	+	[ID=PF3D7_0832100;feature=gene;description=rifin, pseudogene;]
Pf3D7_08_v3	1387793	1387794	Pf3D7_08_v3-1387793-1387794	1	+	[ID=PF3D7_0832100;feature=gene;description=rifin, pseudogene;]
Pf3D7_08_v3	1387827	1387828	Pf3D7_08_v3-1387827-1387828	1	+	[ID=PF3D7_0832100;feature=gene;description=rifin, pseudogene;]
Pf3D7_08_v3	1387962	1387963	Pf3D7_08_v3-1387962-1387963	1	+
Pf3D7_08_v3	1387979	1387980	Pf3D7_08_v3-1387979-1387980	1	+
Pf3D7_11_v3	1898361	1898362	Pf3D7_11_v3-1898361-1898362	1	+
Pf3D7_11_v3	1898907	1898908	Pf3D7_11_v3-1898907-1898908	1	+
Pf3D7_11_v3	1898950	1898951	Pf3D7_11_v3-1898950-1898951	1	+
Pf3D7_11_v3	1900434	1900435	Pf3D7_11_v3-1900434-1900435	1	+	[ID=PF3D7_1147800;feature=gene;description=membrane'+associated'+erythrocyte'+binding-like'+protein;]
Pf3D7_11_v3	1900957	1900958	Pf3D7_11_v3-1900957-1900958	1	+	[ID=PF3D7_1147800;feature=gene;description=membrane'+associated'+erythrocyte'+binding-like'+protein;]
Pf3D7_11_v3	1900972	1900973	Pf3D7_11_v3-1900972-1900973	1	+	[ID=PF3D7_1147800;feature=gene;description=membrane'+associated'+erythrocyte'+binding-like'+protein;]
Pf3D7_11_v3	1901448	1901449	Pf3D7_11_v3-1901448-1901449	1	+	[ID=PF3D7_1147800;feature=gene;description=membrane'+associated'+erythrocyte'+binding-like'+protein;]
Pf3D7_11_v3	1901568	1901569	Pf3D7_11_v3-1901568-1901569	1	+	[ID=PF3D7_1147800;feature=gene;description=membrane'+associated'+erythrocyte'+binding-like'+protein;]
Pf3D7_11_v3	1902095	1902096	Pf3D7_11_v3-1902095-1902096	1	+	[ID=PF3D7_1147800;feature=gene;description=membrane'+associated'+erythrocyte'+binding-like'+protein;]
Pf3D7_11_v3	1902247	1902248	Pf3D7_11_v3-1902247-1902248	1	+	[ID=PF3D7_1147800;feature=gene;description=membrane'+associated'+erythrocyte'+binding-like'+protein;]
Pf3D7_11_v3	1902361	1902362	Pf3D7_11_v3-1902361-1902362	1	+	[ID=PF3D7_1147800;feature=gene;description=membrane'+associated'+erythrocyte'+binding-like'+protein;]
Pf3D7_11_v3	1902636	1902637	Pf3D7_11_v3-1902636-1902637	1	+	[ID=PF3D7_1147800;feature=gene;description=membrane'+associated'+erythrocyte'+binding-like'+protein;]
Pf3D7_11_v3	1904812	1904813	Pf3D7_11_v3-1904812-1904813	1	+	[ID=PF3D7_1147800;feature=gene;description=membrane'+associated'+erythrocyte'+binding-like'+protein;]
Pf3D7_11_v3	1905367	1905368	Pf3D7_11_v3-1905367-1905368	1	+	[ID=PF3D7_1147800;feature=gene;description=membrane'+associated'+erythrocyte'+binding-like'+protein;]
Pf3D7_11_v3	1909287	1909288	Pf3D7_11_v3-1909287-1909288	1	+	[ID=PF3D7_1148000;feature=gene;description="serine/threonine protein kinase, putative";]
Pf3D7_11_v3	1910200	1910201	Pf3D7_11_v3-1910200-1910201	1	+	[ID=PF3D7_1148000;feature=gene;description="serine/threonine protein kinase, putative";]
Pf3D7_11_v3	1910596	1910597	Pf3D7_11_v3-1910596-1910597	1	+	[ID=PF3D7_1148000;feature=gene;description="serine/threonine protein kinase, putative";]
Pf3D7_11_v3	1911787	1911788	Pf3D7_11_v3-1911787-1911788	1	+	[ID=PF3D7_1148000;feature=gene;description="serine/threonine protein kinase, putative";]
Pf3D7_11_v3	1912388	1912389	Pf3D7_11_v3-1912388-1912389	1	+	[ID=PF3D7_1148000;feature=gene;description="serine/threonine protein kinase, putative";]
Pf3D7_11_v3	1912575	1912576	Pf3D7_11_v3-1912575-1912576	1	+	[ID=PF3D7_1148000;feature=gene;description="serine/threonine protein kinase, putative";]
Pf3D7_11_v3	1912800	1912801	Pf3D7_11_v3-1912800-1912801	1	+	[ID=PF3D7_1148000;feature=gene;description="serine/threonine protein kinase, putative";]
Pf3D7_11_v3	1913248	1913249	Pf3D7_11_v3-1913248-1913249	1	+	[ID=PF3D7_1148000;feature=gene;description="serine/threonine protein kinase, putative";]
Pf3D7_11_v3	1914088	1914089	Pf3D7_11_v3-1914088-1914089	1	+
Pf3D7_11_v3	1914107	1914108	Pf3D7_11_v3-1914107-1914108	1	+
Pf3D7_11_v3	1914170	1914171	Pf3D7_11_v3-1914170-1914171	1	+
Pf3D7_11_v3	1914622	1914623	Pf3D7_11_v3-1914622-1914623	1	+
Pf3D7_11_v3	1916855	1916856	Pf3D7_11_v3-1916855-1916856	1	+	[ID=PF3D7_1148100;feature=gene;description=non-coding'+RNA;]
Pf3D7_11_v3	1916945	1916946	Pf3D7_11_v3-1916945-1916946	1	+	[ID=PF3D7_1148100;feature=gene;description=non-coding'+RNA;]
Pf3D7_11_v3	1917259	1917260	Pf3D7_11_v3-1917259-1917260	1	+	[ID=PF3D7_1148100;feature=gene;description=non-coding'+RNA;]
Pf3D7_11_v3	1917323	1917324	Pf3D7_11_v3-1917323-1917324	1	+	[ID=PF3D7_1148100;feature=gene;description=non-coding'+RNA;]
Pf3D7_11_v3	1918114	1918115	Pf3D7_11_v3-1918114-1918115	1	+
Pf3D7_11_v3	1918373	1918374	Pf3D7_11_v3-1918373-1918374	1	+
Pf3D7_11_v3	1918378	1918379	Pf3D7_11_v3-1918378-1918379	1	+
Pf3D7_11_v3	1918694	1918695	Pf3D7_11_v3-1918694-1918695	1	+
Pf3D7_11_v3	1920202	1920203	Pf3D7_11_v3-1920202-1920203	1	+
Pf3D7_11_v3	1920518	1920519	Pf3D7_11_v3-1920518-1920519	1	+	[ID=PF3D7_1148200;feature=gene;description=non-coding'+RNA;]
Pf3D7_11_v3	1920536	1920537	Pf3D7_11_v3-1920536-1920537	1	+	[ID=PF3D7_1148200;feature=gene;description=non-coding'+RNA;]
Pf3D7_11_v3	1920589	1920590	Pf3D7_11_v3-1920589-1920590	1	+	[ID=PF3D7_1148200;feature=gene;description=non-coding'+RNA;]
Pf3D7_11_v3	1920808	1920809	Pf3D7_11_v3-1920808-1920809	1	+	[ID=PF3D7_1148200;feature=gene;description=non-coding'+RNA;]
Pf3D7_11_v3	1921072	1921073	Pf3D7_11_v3-1921072-1921073	1	+
Pf3D7_11_v3	1921297	1921298	Pf3D7_11_v3-1921297-1921298	1	+
Pf3D7_11_v3	1921382	1921383	Pf3D7_11_v3-1921382-1921383	1	+
Pf3D7_11_v3	1921416	1921417	Pf3D7_11_v3-1921416-1921417	1	+
Pf3D7_11_v3	1921467	1921468	Pf3D7_11_v3-1921467-1921468	1	+
Pf3D7_11_v3	1921470	1921471	Pf3D7_11_v3-1921470-1921471	1	+
Pf3D7_11_v3	1921482	1921483	Pf3D7_11_v3-1921482-1921483	1	+
Pf3D7_11_v3	1921619	1921620	Pf3D7_11_v3-1921619-1921620	1	+
Pf3D7_11_v3	1921847	1921848	Pf3D7_11_v3-1921847-1921848	1	+
Pf3D7_11_v3	1922480	1922481	Pf3D7_11_v3-1922480-1922481	1	+
Pf3D7_11_v3	1923240	1923241	Pf3D7_11_v3-1923240-1923241	1	+
Pf3D7_11_v3	1923356	1923357	Pf3D7_11_v3-1923356-1923357	1	+
Pf3D7_11_v3	1923370	1923371	Pf3D7_11_v3-1923370-1923371	1	+
Pf3D7_11_v3	1924009	1924010	Pf3D7_11_v3-1924009-1924010	1	+
Pf3D7_11_v3	1924104	1924105	Pf3D7_11_v3-1924104-1924105	1	+
Pf3D7_11_v3	1925770	1925771	Pf3D7_11_v3-1925770-1925771	1	+
Pf3D7_11_v3	1925882	1925883	Pf3D7_11_v3-1925882-1925883	1	+
Pf3D7_11_v3	1928144	1928145	Pf3D7_11_v3-1928144-1928145	1	+
Pf3D7_11_v3	1928316	1928317	Pf3D7_11_v3-1928316-1928317	1	+
Pf3D7_11_v3	1928360	1928361	Pf3D7_11_v3-1928360-1928361	1	+
Pf3D7_11_v3	1928383	1928384	Pf3D7_11_v3-1928383-1928384	1	+
Pf3D7_11_v3	1928388	1928389	Pf3D7_11_v3-1928388-1928389	1	+
Pf3D7_11_v3	1928398	1928399	Pf3D7_11_v3-1928398-1928399	1	+
Pf3D7_11_v3	1928484	1928485	Pf3D7_11_v3-1928484-1928485	1	+
Pf3D7_11_v3	1932211	1932212	Pf3D7_11_v3-1932211-1932212	1	+	[ID=PF3D7_1148640;feature=gene;description=28S'+ribosomal'+RNA;]
Pf3D7_11_v3	1932651	1932652	Pf3D7_11_v3-1932651-1932652	1	+	[ID=PF3D7_1148640;feature=gene;description=28S'+ribosomal'+RNA;]
Pf3D7_11_v3	1932784	1932785	Pf3D7_11_v3-1932784-1932785	1	+	[ID=PF3D7_1148640;feature=gene;description=28S'+ribosomal'+RNA;]
Pf3D7_11_v3	1932801	1932802	Pf3D7_11_v3-1932801-1932802	1	+	[ID=PF3D7_1148640;feature=gene;description=28S'+ribosomal'+RNA;]
Pf3D7_11_v3	1932812	1932813	Pf3D7_11_v3-1932812-1932813	1	+	[ID=PF3D7_1148640;feature=gene;description=28S'+ribosomal'+RNA;]
Pf3D7_11_v3	1932820	1932821	Pf3D7_11_v3-1932820-1932821	1	+	[ID=PF3D7_1148640;feature=gene;description=28S'+ribosomal'+RNA;]
Pf3D7_11_v3	1932826	1932827	Pf3D7_11_v3-1932826-1932827	1	+	[ID=PF3D7_1148640;feature=gene;description=28S'+ribosomal'+RNA;]
Pf3D7_11_v3	1932827	1932828	Pf3D7_11_v3-1932827-1932828	1	+	[ID=PF3D7_1148640;feature=gene;description=28S'+ribosomal'+RNA;]
Pf3D7_11_v3	1932830	1932831	Pf3D7_11_v3-1932830-1932831	1	+	[ID=PF3D7_1148640;feature=gene;description=28S'+ribosomal'+RNA;]
Pf3D7_11_v3	1932833	1932834	Pf3D7_11_v3-1932833-1932834	1	+	[ID=PF3D7_1148640;feature=gene;description=28S'+ribosomal'+RNA;]
Pf3D7_11_v3	1933067	1933068	Pf3D7_11_v3-1933067-1933068	1	+	[ID=PF3D7_1148640;feature=gene;description=28S'+ribosomal'+RNA;]
Pf3D7_11_v3	1933288	1933289	Pf3D7_11_v3-1933288-1933289	1	+
Pf3D7_11_v3	1933292	1933293	Pf3D7_11_v3-1933292-1933293	1	+
Pf3D7_11_v3	1933570	1933571	Pf3D7_11_v3-1933570-1933571	1	+
Pf3D7_11_v3	1934043	1934044	Pf3D7_11_v3-1934043-1934044	1	+
Pf3D7_11_v3	1934102	1934103	Pf3D7_11_v3-1934102-1934103	1	+
Pf3D7_11_v3	1934893	1934894	Pf3D7_11_v3-1934893-1934894	1	+	[ID=PF3D7_1148700;feature=gene;description="Plasmodium exported protein (PHISTc), unknown function";]
Pf3D7_11_v3	1935030	1935031	Pf3D7_11_v3-1935030-1935031	1	+	[ID=PF3D7_1148700;feature=gene;description="Plasmodium exported protein (PHISTc), unknown function";]
Pf3D7_11_v3	1935050	1935051	Pf3D7_11_v3-1935050-1935051	1	+	[ID=PF3D7_1148700;feature=gene;description="Plasmodium exported protein (PHISTc), unknown function";]
Pf3D7_11_v3	1935087	1935088	Pf3D7_11_v3-1935087-1935088	1	+	[ID=PF3D7_1148700;feature=gene;description="Plasmodium exported protein (PHISTc), unknown function";]
Pf3D7_11_v3	1935101	1935102	Pf3D7_11_v3-1935101-1935102	1	+	[ID=PF3D7_1148700;feature=gene;description="Plasmodium exported protein (PHISTc), unknown function";]
Pf3D7_11_v3	1935226	1935227	Pf3D7_11_v3-1935226-1935227	1	+	[ID=PF3D7_1148700;feature=gene;description="Plasmodium exported protein (PHISTc), unknown function";]
Pf3D7_11_v3	1935291	1935292	Pf3D7_11_v3-1935291-1935292	1	+	[ID=PF3D7_1148700;feature=gene;description="Plasmodium exported protein (PHISTc), unknown function";]
Pf3D7_11_v3	1937341	1937342	Pf3D7_11_v3-1937341-1937342	1	+
Pf3D7_11_v3	1937382	1937383	Pf3D7_11_v3-1937382-1937383	1	+
Pf3D7_11_v3	1937388	1937389	Pf3D7_11_v3-1937388-1937389	1	+
Pf3D7_11_v3	1938225	1938226	Pf3D7_11_v3-1938225-1938226	1	+
Pf3D7_11_v3	1938251	1938252	Pf3D7_11_v3-1938251-1938252	1	+
Pf3D7_11_v3	1938274	1938275	Pf3D7_11_v3-1938274-1938275	1	+
Pf3D7_11_v3	1939614	1939615	Pf3D7_11_v3-1939614-1939615	1	+
Pf3D7_11_v3	1939939	1939940	Pf3D7_11_v3-1939939-1939940	1	+
Pf3D7_11_v3	1940094	1940095	Pf3D7_11_v3-1940094-1940095	1	+
Pf3D7_11_v3	1940603	1940604	Pf3D7_11_v3-1940603-1940604	1	+
Pf3D7_11_v3	1940625	1940626	Pf3D7_11_v3-1940625-1940626	1	+
Pf3D7_11_v3	1940838	1940839	Pf3D7_11_v3-1940838-1940839	1	+
Pf3D7_11_v3	1940841	1940842	Pf3D7_11_v3-1940841-1940842	1	+
Pf3D7_11_v3	1940842	1940843	Pf3D7_11_v3-1940842-1940843	1	+
Pf3D7_11_v3	1940996	1940997	Pf3D7_11_v3-1940996-1940997	1	+
Pf3D7_11_v3	1941074	1941075	Pf3D7_11_v3-1941074-1941075	1	+
Pf3D7_11_v3	1941725	1941726	Pf3D7_11_v3-1941725-1941726	1	+	[ID=PF3D7_1148800;feature=gene;description="Plasmodium exported protein (hyp11), unknown function";]
Pf3D7_11_v3	1942295	1942296	Pf3D7_11_v3-1942295-1942296	1	+	[ID=PF3D7_1148800;feature=gene;description="Plasmodium exported protein (hyp11), unknown function";]
Pf3D7_11_v3	1942296	1942297	Pf3D7_11_v3-1942296-1942297	1	+	[ID=PF3D7_1148800;feature=gene;description="Plasmodium exported protein (hyp11), unknown function";]
Pf3D7_11_v3	1942302	1942303	Pf3D7_11_v3-1942302-1942303	1	+	[ID=PF3D7_1148800;feature=gene;description="Plasmodium exported protein (hyp11), unknown function";]
Pf3D7_11_v3	1942473	1942474	Pf3D7_11_v3-1942473-1942474	1	+	[ID=PF3D7_1148800;feature=gene;description="Plasmodium exported protein (hyp11), unknown function";]
Pf3D7_11_v3	1943948	1943949	Pf3D7_11_v3-1943948-1943949	1	+
Pf3D7_11_v3	1943988	1943989	Pf3D7_11_v3-1943988-1943989	1	+
Pf3D7_11_v3	1944053	1944054	Pf3D7_11_v3-1944053-1944054	1	+
Pf3D7_11_v3	1944860	1944861	Pf3D7_11_v3-1944860-1944861	1	+
Pf3D7_11_v3	1944861	1944862	Pf3D7_11_v3-1944861-1944862	1	+
Pf3D7_11_v3	1945954	1945955	Pf3D7_11_v3-1945954-1945955	1	+	[ID=PF3D7_1148900;feature=gene;description=Plasmodium exported protein, unknown function;]
Pf3D7_11_v3	1946028	1946029	Pf3D7_11_v3-1946028-1946029	1	+	[ID=PF3D7_1148900;feature=gene;description=Plasmodium exported protein, unknown function;]
Pf3D7_11_v3	1946052	1946053	Pf3D7_11_v3-1946052-1946053	1	+
Pf3D7_11_v3	1946967	1946968	Pf3D7_11_v3-1946967-1946968	1	+
Pf3D7_11_v3	1947665	1947666	Pf3D7_11_v3-1947665-1947666	1	+
Pf3D7_11_v3	1948085	1948086	Pf3D7_11_v3-1948085-1948086	1	+
Pf3D7_11_v3	1948102	1948103	Pf3D7_11_v3-1948102-1948103	1	+
Pf3D7_11_v3	1948158	1948159	Pf3D7_11_v3-1948158-1948159	1	+
Pf3D7_11_v3	1948207	1948208	Pf3D7_11_v3-1948207-1948208	1	+
Pf3D7_11_v3	1950486	1950487	Pf3D7_11_v3-1950486-1950487	1	+	[ID=PF3D7_1149000;feature=gene;description=antigen 332, DBL-like protein;]
Pf3D7_11_v3	1950557	1950558	Pf3D7_11_v3-1950557-1950558	1	+	[ID=PF3D7_1149000;feature=gene;description=antigen 332, DBL-like protein;]
Pf3D7_11_v3	1950663	1950664	Pf3D7_11_v3-1950663-1950664	1	+	[ID=PF3D7_1149000;feature=gene;description=antigen 332, DBL-like protein;]
Pf3D7_11_v3	1950747	1950748	Pf3D7_11_v3-1950747-1950748	1	+	[ID=PF3D7_1149000;feature=gene;description=antigen 332, DBL-like protein;]
Pf3D7_11_v3	1950766	1950767	Pf3D7_11_v3-1950766-1950767	1	+	[ID=PF3D7_1149000;feature=gene;description=antigen 332, DBL-like protein;]
Pf3D7_11_v3	1950997	1950998	Pf3D7_11_v3-1950997-1950998	1	+	[ID=PF3D7_1149000;feature=gene;description=antigen 332, DBL-like protein;]
Pf3D7_11_v3	1951184	1951185	Pf3D7_11_v3-1951184-1951185	1	+	[ID=PF3D7_1149000;feature=gene;description=antigen 332, DBL-like protein;]
Pf3D7_11_v3	1951223	1951224	Pf3D7_11_v3-1951223-1951224	1	+	[ID=PF3D7_1149000;feature=gene;description=antigen 332, DBL-like protein;]
Pf3D7_11_v3	1951590	1951591	Pf3D7_11_v3-1951590-1951591	1	+	[ID=PF3D7_1149000;feature=gene;description=antigen 332, DBL-like protein;]
Pf3D7_11_v3	1952331	1952332	Pf3D7_11_v3-1952331-1952332	1	+	[ID=PF3D7_1149000;feature=gene;description=antigen 332, DBL-like protein;]
Pf3D7_11_v3	1952426	1952427	Pf3D7_11_v3-1952426-1952427	1	+	[ID=PF3D7_1149000;feature=gene;description=antigen 332, DBL-like protein;]
Pf3D7_11_v3	1952459	1952460	Pf3D7_11_v3-1952459-1952460	1	+	[ID=PF3D7_1149000;feature=gene;description=antigen 332, DBL-like protein;]
Pf3D7_11_v3	1952579	1952580	Pf3D7_11_v3-1952579-1952580	1	+	[ID=PF3D7_1149000;feature=gene;description=antigen 332, DBL-like protein;]
Pf3D7_11_v3	1954293	1954294	Pf3D7_11_v3-1954293-1954294	1	+	[ID=PF3D7_1149000;feature=gene;description=antigen 332, DBL-like protein;]
Pf3D7_11_v3	1955962	1955963	Pf3D7_11_v3-1955962-1955963	1	+	[ID=PF3D7_1149000;feature=gene;description=antigen 332, DBL-like protein;]
Pf3D7_11_v3	1957291	1957292	Pf3D7_11_v3-1957291-1957292	1	+	[ID=PF3D7_1149000;feature=gene;description=antigen 332, DBL-like protein;]
Pf3D7_11_v3	1957481	1957482	Pf3D7_11_v3-1957481-1957482	1	+	[ID=PF3D7_1149000;feature=gene;description=antigen 332, DBL-like protein;]
Pf3D7_11_v3	1961381	1961382	Pf3D7_11_v3-1961381-1961382	1	+	[ID=PF3D7_1149000;feature=gene;description=antigen 332, DBL-like protein;]
Pf3D7_11_v3	1962839	1962840	Pf3D7_11_v3-1962839-1962840	1	+	[ID=PF3D7_1149000;feature=gene;description=antigen 332, DBL-like protein;]
Pf3D7_11_v3	1963807	1963808	Pf3D7_11_v3-1963807-1963808	1	+	[ID=PF3D7_1149000;feature=gene;description=antigen 332, DBL-like protein;]
Pf3D7_11_v3	1966951	1966952	Pf3D7_11_v3-1966951-1966952	1	+	[ID=PF3D7_1149000;feature=gene;description=antigen 332, DBL-like protein;]
Pf3D7_11_v3	1967488	1967489	Pf3D7_11_v3-1967488-1967489	1	+	[ID=PF3D7_1149000;feature=gene;description=antigen 332, DBL-like protein;]
Pf3D7_11_v3	1967526	1967527	Pf3D7_11_v3-1967526-1967527	1	+	[ID=PF3D7_1149000;feature=gene;description=antigen 332, DBL-like protein;]
Pf3D7_11_v3	1967577	1967578	Pf3D7_11_v3-1967577-1967578	1	+	[ID=PF3D7_1149000;feature=gene;description=antigen 332, DBL-like protein;]
Pf3D7_11_v3	1967596	1967597	Pf3D7_11_v3-1967596-1967597	1	+	[ID=PF3D7_1149000;feature=gene;description=antigen 332, DBL-like protein;]
Pf3D7_11_v3	1968169	1968170	Pf3D7_11_v3-1968169-1968170	1	+	[ID=PF3D7_1149000;feature=gene;description=antigen 332, DBL-like protein;]
Pf3D7_11_v3	1968274	1968275	Pf3D7_11_v3-1968274-1968275	1	+	[ID=PF3D7_1149000;feature=gene;description=antigen 332, DBL-like protein;]
Pf3D7_11_v3	1968304	1968305	Pf3D7_11_v3-1968304-1968305	1	+	[ID=PF3D7_1149000;feature=gene;description=antigen 332, DBL-like protein;]
Pf3D7_11_v3	1968490	1968491	Pf3D7_11_v3-1968490-1968491	1	+	[ID=PF3D7_1149000;feature=gene;description=antigen 332, DBL-like protein;]
Pf3D7_11_v3	1968582	1968583	Pf3D7_11_v3-1968582-1968583	1	+	[ID=PF3D7_1149000;feature=gene;description=antigen 332, DBL-like protein;]
Pf3D7_11_v3	1968671	1968672	Pf3D7_11_v3-1968671-1968672	1	+	[ID=PF3D7_1149000;feature=gene;description=antigen 332, DBL-like protein;]
Pf3D7_11_v3	1968691	1968692	Pf3D7_11_v3-1968691-1968692	1	+	[ID=PF3D7_1149000;feature=gene;description=antigen 332, DBL-like protein;]
Pf3D7_11_v3	1970325	1970326	Pf3D7_11_v3-1970325-1970326	1	+
Pf3D7_11_v3	1971045	1971046	Pf3D7_11_v3-1971045-1971046	1	+
Pf3D7_11_v3	1971355	1971356	Pf3D7_11_v3-1971355-1971356	1	+
Pf3D7_11_v3	1971358	1971359	Pf3D7_11_v3-1971358-1971359	1	+
Pf3D7_11_v3	1971614	1971615	Pf3D7_11_v3-1971614-1971615	1	+
Pf3D7_11_v3	1971978	1971979	Pf3D7_11_v3-1971978-1971979	1	+
Pf3D7_11_v3	1972003	1972004	Pf3D7_11_v3-1972003-1972004	1	+
Pf3D7_11_v3	1972017	1972018	Pf3D7_11_v3-1972017-1972018	1	+
Pf3D7_11_v3	1972021	1972022	Pf3D7_11_v3-1972021-1972022	1	+
Pf3D7_11_v3	1972022	1972023	Pf3D7_11_v3-1972022-1972023	1	+
Pf3D7_11_v3	1972314	1972315	Pf3D7_11_v3-1972314-1972315	1	+
Pf3D7_11_v3	1972447	1972448	Pf3D7_11_v3-1972447-1972448	1	+	[ID=PF3D7_1149100;feature=gene;description=Plasmodium exported protein, unknown function;]
Pf3D7_11_v3	1972501	1972502	Pf3D7_11_v3-1972501-1972502	1	+	[ID=PF3D7_1149100;feature=gene;description=Plasmodium exported protein, unknown function;]
Pf3D7_11_v3	1972791	1972792	Pf3D7_11_v3-1972791-1972792	1	+	[ID=PF3D7_1149100;feature=gene;description=Plasmodium exported protein, unknown function;]
Pf3D7_11_v3	1974797	1974798	Pf3D7_11_v3-1974797-1974798	1	+
Pf3D7_11_v3	1975762	1975763	Pf3D7_11_v3-1975762-1975763	1	+
Pf3D7_11_v3	1976795	1976796	Pf3D7_11_v3-1976795-1976796	1	+	[ID=PF3D7_1149200;feature=gene;description=ring-infected'+erythrocyte'+surface'+antigen;]
Pf3D7_11_v3	1976806	1976807	Pf3D7_11_v3-1976806-1976807	1	+	[ID=PF3D7_1149200;feature=gene;description=ring-infected'+erythrocyte'+surface'+antigen;]
Pf3D7_11_v3	1976807	1976808	Pf3D7_11_v3-1976807-1976808	1	+	[ID=PF3D7_1149200;feature=gene;description=ring-infected'+erythrocyte'+surface'+antigen;]
Pf3D7_11_v3	1976950	1976951	Pf3D7_11_v3-1976950-1976951	1	+	[ID=PF3D7_1149200;feature=gene;description=ring-infected'+erythrocyte'+surface'+antigen;]
Pf3D7_11_v3	1976967	1976968	Pf3D7_11_v3-1976967-1976968	1	+	[ID=PF3D7_1149200;feature=gene;description=ring-infected'+erythrocyte'+surface'+antigen;]
Pf3D7_11_v3	1976990	1976991	Pf3D7_11_v3-1976990-1976991	1	+	[ID=PF3D7_1149200;feature=gene;description=ring-infected'+erythrocyte'+surface'+antigen;]
Pf3D7_11_v3	1977038	1977039	Pf3D7_11_v3-1977038-1977039	1	+	[ID=PF3D7_1149200;feature=gene;description=ring-infected'+erythrocyte'+surface'+antigen;]
Pf3D7_11_v3	1977165	1977166	Pf3D7_11_v3-1977165-1977166	1	+	[ID=PF3D7_1149200;feature=gene;description=ring-infected'+erythrocyte'+surface'+antigen;]
Pf3D7_11_v3	1977193	1977194	Pf3D7_11_v3-1977193-1977194	1	+	[ID=PF3D7_1149200;feature=gene;description=ring-infected'+erythrocyte'+surface'+antigen;]
Pf3D7_11_v3	1977456	1977457	Pf3D7_11_v3-1977456-1977457	1	+	[ID=PF3D7_1149200;feature=gene;description=ring-infected'+erythrocyte'+surface'+antigen;]
Pf3D7_11_v3	1977489	1977490	Pf3D7_11_v3-1977489-1977490	1	+	[ID=PF3D7_1149200;feature=gene;description=ring-infected'+erythrocyte'+surface'+antigen;]
Pf3D7_11_v3	1977847	1977848	Pf3D7_11_v3-1977847-1977848	1	+	[ID=PF3D7_1149200;feature=gene;description=ring-infected'+erythrocyte'+surface'+antigen;]
Pf3D7_11_v3	1977849	1977850	Pf3D7_11_v3-1977849-1977850	1	+	[ID=PF3D7_1149200;feature=gene;description=ring-infected'+erythrocyte'+surface'+antigen;]
Pf3D7_11_v3	1977856	1977857	Pf3D7_11_v3-1977856-1977857	1	+	[ID=PF3D7_1149200;feature=gene;description=ring-infected'+erythrocyte'+surface'+antigen;]
Pf3D7_11_v3	1977857	1977858	Pf3D7_11_v3-1977857-1977858	1	+	[ID=PF3D7_1149200;feature=gene;description=ring-infected'+erythrocyte'+surface'+antigen;]
Pf3D7_11_v3	1977858	1977859	Pf3D7_11_v3-1977858-1977859	1	+	[ID=PF3D7_1149200;feature=gene;description=ring-infected'+erythrocyte'+surface'+antigen;]
Pf3D7_11_v3	1977861	1977862	Pf3D7_11_v3-1977861-1977862	1	+	[ID=PF3D7_1149200;feature=gene;description=ring-infected'+erythrocyte'+surface'+antigen;]
Pf3D7_11_v3	1978172	1978173	Pf3D7_11_v3-1978172-1978173	1	+	[ID=PF3D7_1149200;feature=gene;description=ring-infected'+erythrocyte'+surface'+antigen;]
Pf3D7_11_v3	1978289	1978290	Pf3D7_11_v3-1978289-1978290	1	+	[ID=PF3D7_1149200;feature=gene;description=ring-infected'+erythrocyte'+surface'+antigen;]
Pf3D7_11_v3	1978325	1978326	Pf3D7_11_v3-1978325-1978326	1	+	[ID=PF3D7_1149200;feature=gene;description=ring-infected'+erythrocyte'+surface'+antigen;]
Pf3D7_11_v3	1978658	1978659	Pf3D7_11_v3-1978658-1978659	1	+	[ID=PF3D7_1149200;feature=gene;description=ring-infected'+erythrocyte'+surface'+antigen;]
Pf3D7_11_v3	1978659	1978660	Pf3D7_11_v3-1978659-1978660	1	+	[ID=PF3D7_1149200;feature=gene;description=ring-infected'+erythrocyte'+surface'+antigen;]
Pf3D7_11_v3	1978684	1978685	Pf3D7_11_v3-1978684-1978685	1	+	[ID=PF3D7_1149200;feature=gene;description=ring-infected'+erythrocyte'+surface'+antigen;]
Pf3D7_11_v3	1978867	1978868	Pf3D7_11_v3-1978867-1978868	1	+	[ID=PF3D7_1149200;feature=gene;description=ring-infected'+erythrocyte'+surface'+antigen;]
Pf3D7_11_v3	1978983	1978984	Pf3D7_11_v3-1978983-1978984	1	+	[ID=PF3D7_1149200;feature=gene;description=ring-infected'+erythrocyte'+surface'+antigen;]
Pf3D7_11_v3	1979011	1979012	Pf3D7_11_v3-1979011-1979012	1	+	[ID=PF3D7_1149200;feature=gene;description=ring-infected'+erythrocyte'+surface'+antigen;]
Pf3D7_11_v3	1979126	1979127	Pf3D7_11_v3-1979126-1979127	1	+	[ID=PF3D7_1149200;feature=gene;description=ring-infected'+erythrocyte'+surface'+antigen;]
Pf3D7_11_v3	1979199	1979200	Pf3D7_11_v3-1979199-1979200	1	+	[ID=PF3D7_1149200;feature=gene;description=ring-infected'+erythrocyte'+surface'+antigen;]
Pf3D7_11_v3	1981252	1981253	Pf3D7_11_v3-1981252-1981253	1	+
Pf3D7_11_v3	1982225	1982226	Pf3D7_11_v3-1982225-1982226	1	+
Pf3D7_11_v3	1982228	1982229	Pf3D7_11_v3-1982228-1982229	1	+
Pf3D7_11_v3	1983263	1983264	Pf3D7_11_v3-1983263-1983264	1	+	[ID=PF3D7_1149300;feature=gene;description="serine/threonine protein kinase, FIKK family";]
Pf3D7_11_v3	1983338	1983339	Pf3D7_11_v3-1983338-1983339	1	+	[ID=PF3D7_1149300;feature=gene;description="serine/threonine protein kinase, FIKK family";]
Pf3D7_11_v3	1983977	1983978	Pf3D7_11_v3-1983977-1983978	1	+	[ID=PF3D7_1149300;feature=gene;description="serine/threonine protein kinase, FIKK family";]
Pf3D7_11_v3	1984546	1984547	Pf3D7_11_v3-1984546-1984547	1	+
Pf3D7_11_v3	1984796	1984797	Pf3D7_11_v3-1984796-1984797	1	+
Pf3D7_11_v3	1985306	1985307	Pf3D7_11_v3-1985306-1985307	1	+
Pf3D7_11_v3	1985660	1985661	Pf3D7_11_v3-1985660-1985661	1	+
Pf3D7_11_v3	1985695	1985696	Pf3D7_11_v3-1985695-1985696	1	+
Pf3D7_11_v3	1985696	1985697	Pf3D7_11_v3-1985696-1985697	1	+
Pf3D7_11_v3	1985701	1985702	Pf3D7_11_v3-1985701-1985702	1	+
Pf3D7_11_v3	1985783	1985784	Pf3D7_11_v3-1985783-1985784	1	+
Pf3D7_11_v3	1985790	1985791	Pf3D7_11_v3-1985790-1985791	1	+
Pf3D7_11_v3	1986121	1986122	Pf3D7_11_v3-1986121-1986122	1	+	[ID=PF3D7_1149400;feature=gene;description=Plasmodium exported protein, unknown function;]
Pf3D7_11_v3	1986166	1986167	Pf3D7_11_v3-1986166-1986167	1	+	[ID=PF3D7_1149400;feature=gene;description=Plasmodium exported protein, unknown function;]
Pf3D7_11_v3	1986186	1986187	Pf3D7_11_v3-1986186-1986187	1	+	[ID=PF3D7_1149400;feature=gene;description=Plasmodium exported protein, unknown function;]
Pf3D7_11_v3	1986192	1986193	Pf3D7_11_v3-1986192-1986193	1	+	[ID=PF3D7_1149400;feature=gene;description=Plasmodium exported protein, unknown function;]
Pf3D7_11_v3	1986199	1986200	Pf3D7_11_v3-1986199-1986200	1	+	[ID=PF3D7_1149400;feature=gene;description=Plasmodium exported protein, unknown function;]
Pf3D7_11_v3	1986200	1986201	Pf3D7_11_v3-1986200-1986201	1	+	[ID=PF3D7_1149400;feature=gene;description=Plasmodium exported protein, unknown function;]
Pf3D7_11_v3	1986216	1986217	Pf3D7_11_v3-1986216-1986217	1	+	[ID=PF3D7_1149400;feature=gene;description=Plasmodium exported protein, unknown function;]
Pf3D7_11_v3	1986289	1986290	Pf3D7_11_v3-1986289-1986290	1	+	[ID=PF3D7_1149400;feature=gene;description=Plasmodium exported protein, unknown function;]
Pf3D7_11_v3	1986347	1986348	Pf3D7_11_v3-1986347-1986348	1	+	[ID=PF3D7_1149400;feature=gene;description=Plasmodium exported protein, unknown function;]
Pf3D7_11_v3	1986634	1986635	Pf3D7_11_v3-1986634-1986635	1	+	[ID=PF3D7_1149400;feature=gene;description=Plasmodium exported protein, unknown function;]
Pf3D7_11_v3	1986660	1986661	Pf3D7_11_v3-1986660-1986661	1	+
Pf3D7_11_v3	1986718	1986719	Pf3D7_11_v3-1986718-1986719	1	+
Pf3D7_11_v3	1986762	1986763	Pf3D7_11_v3-1986762-1986763	1	+
Pf3D7_11_v3	1986792	1986793	Pf3D7_11_v3-1986792-1986793	1	+
Pf3D7_11_v3	1987362	1987363	Pf3D7_11_v3-1987362-1987363	1	+
Pf3D7_11_v3	1987424	1987425	Pf3D7_11_v3-1987424-1987425	1	+
Pf3D7_11_v3	1987522	1987523	Pf3D7_11_v3-1987522-1987523	1	+
Pf3D7_11_v3	1987771	1987772	Pf3D7_11_v3-1987771-1987772	1	+
Pf3D7_11_v3	1987787	1987788	Pf3D7_11_v3-1987787-1987788	1	+
Pf3D7_11_v3	1988442	1988443	Pf3D7_11_v3-1988442-1988443	1	+
Pf3D7_11_v3	1988508	1988509	Pf3D7_11_v3-1988508-1988509	1	+
Pf3D7_11_v3	1988533	1988534	Pf3D7_11_v3-1988533-1988534	1	+
Pf3D7_11_v3	1988730	1988731	Pf3D7_11_v3-1988730-1988731	1	+
Pf3D7_11_v3	1988744	1988745	Pf3D7_11_v3-1988744-1988745	1	+
Pf3D7_11_v3	1988745	1988746	Pf3D7_11_v3-1988745-1988746	1	+
Pf3D7_11_v3	1988754	1988755	Pf3D7_11_v3-1988754-1988755	1	+
Pf3D7_11_v3	1988778	1988779	Pf3D7_11_v3-1988778-1988779	1	+
Pf3D7_11_v3	1988841	1988842	Pf3D7_11_v3-1988841-1988842	1	+
Pf3D7_11_v3	1989086	1989087	Pf3D7_11_v3-1989086-1989087	1	+
Pf3D7_11_v3	1989144	1989145	Pf3D7_11_v3-1989144-1989145	1	+
Pf3D7_11_v3	1989145	1989146	Pf3D7_11_v3-1989145-1989146	1	+
Pf3D7_11_v3	1989254	1989255	Pf3D7_11_v3-1989254-1989255	1	+
Pf3D7_11_v3	1989263	1989264	Pf3D7_11_v3-1989263-1989264	1	+
Pf3D7_11_v3	1989315	1989316	Pf3D7_11_v3-1989315-1989316	1	+
Pf3D7_11_v3	1989474	1989475	Pf3D7_11_v3-1989474-1989475	1	+
Pf3D7_11_v3	1989521	1989522	Pf3D7_11_v3-1989521-1989522	1	+
Pf3D7_11_v3	1990935	1990936	Pf3D7_11_v3-1990935-1990936	1	+
Pf3D7_11_v3	1991089	1991090	Pf3D7_11_v3-1991089-1991090	1	+
Pf3D7_11_v3	1991121	1991122	Pf3D7_11_v3-1991121-1991122	1	+
Pf3D7_11_v3	1991179	1991180	Pf3D7_11_v3-1991179-1991180	1	+
Pf3D7_11_v3	1991406	1991407	Pf3D7_11_v3-1991406-1991407	1	+	[ID=PF3D7_1149500;feature=gene;description=ring-infected erythrocyte surface antigen 2, pseudogene;]
Pf3D7_11_v3	1991586	1991587	Pf3D7_11_v3-1991586-1991587	1	+	[ID=PF3D7_1149500;feature=gene;description=ring-infected erythrocyte surface antigen 2, pseudogene;]
Pf3D7_11_v3	1991877	1991878	Pf3D7_11_v3-1991877-1991878	1	+	[ID=PF3D7_1149500;feature=gene;description=ring-infected erythrocyte surface antigen 2, pseudogene;]
Pf3D7_11_v3	1992021	1992022	Pf3D7_11_v3-1992021-1992022	1	+	[ID=PF3D7_1149500;feature=gene;description=ring-infected erythrocyte surface antigen 2, pseudogene;]
Pf3D7_11_v3	1992059	1992060	Pf3D7_11_v3-1992059-1992060	1	+	[ID=PF3D7_1149500;feature=gene;description=ring-infected erythrocyte surface antigen 2, pseudogene;]
Pf3D7_11_v3	1992090	1992091	Pf3D7_11_v3-1992090-1992091	1	+	[ID=PF3D7_1149500;feature=gene;description=ring-infected erythrocyte surface antigen 2, pseudogene;]
Pf3D7_11_v3	1992129	1992130	Pf3D7_11_v3-1992129-1992130	1	+	[ID=PF3D7_1149500;feature=gene;description=ring-infected erythrocyte surface antigen 2, pseudogene;]
Pf3D7_11_v3	1992204	1992205	Pf3D7_11_v3-1992204-1992205	1	+	[ID=PF3D7_1149500;feature=gene;description=ring-infected erythrocyte surface antigen 2, pseudogene;]
Pf3D7_11_v3	1992494	1992495	Pf3D7_11_v3-1992494-1992495	1	+	[ID=PF3D7_1149500;feature=gene;description=ring-infected erythrocyte surface antigen 2, pseudogene;]
Pf3D7_11_v3	1992742	1992743	Pf3D7_11_v3-1992742-1992743	1	+	[ID=PF3D7_1149500;feature=gene;description=ring-infected erythrocyte surface antigen 2, pseudogene;]
Pf3D7_11_v3	1992750	1992751	Pf3D7_11_v3-1992750-1992751	1	+	[ID=PF3D7_1149500;feature=gene;description=ring-infected erythrocyte surface antigen 2, pseudogene;]
Pf3D7_11_v3	1992753	1992754	Pf3D7_11_v3-1992753-1992754	1	+	[ID=PF3D7_1149500;feature=gene;description=ring-infected erythrocyte surface antigen 2, pseudogene;]
Pf3D7_11_v3	1993009	1993010	Pf3D7_11_v3-1993009-1993010	1	+	[ID=PF3D7_1149500;feature=gene;description=ring-infected erythrocyte surface antigen 2, pseudogene;]
Pf3D7_11_v3	1993039	1993040	Pf3D7_11_v3-1993039-1993040	1	+	[ID=PF3D7_1149500;feature=gene;description=ring-infected erythrocyte surface antigen 2, pseudogene;]
Pf3D7_11_v3	1993164	1993165	Pf3D7_11_v3-1993164-1993165	1	+	[ID=PF3D7_1149500;feature=gene;description=ring-infected erythrocyte surface antigen 2, pseudogene;]
Pf3D7_11_v3	1993347	1993348	Pf3D7_11_v3-1993347-1993348	1	+	[ID=PF3D7_1149500;feature=gene;description=ring-infected erythrocyte surface antigen 2, pseudogene;]
Pf3D7_11_v3	1993458	1993459	Pf3D7_11_v3-1993458-1993459	1	+	[ID=PF3D7_1149500;feature=gene;description=ring-infected erythrocyte surface antigen 2, pseudogene;]
Pf3D7_11_v3	1993655	1993656	Pf3D7_11_v3-1993655-1993656	1	+	[ID=PF3D7_1149500;feature=gene;description=ring-infected erythrocyte surface antigen 2, pseudogene;]
Pf3D7_11_v3	1993871	1993872	Pf3D7_11_v3-1993871-1993872	1	+	[ID=PF3D7_1149500;feature=gene;description=ring-infected erythrocyte surface antigen 2, pseudogene;]
Pf3D7_11_v3	1994152	1994153	Pf3D7_11_v3-1994152-1994153	1	+
Pf3D7_11_v3	1995324	1995325	Pf3D7_11_v3-1995324-1995325	1	+
Pf3D7_11_v3	1995459	1995460	Pf3D7_11_v3-1995459-1995460	1	+
Pf3D7_11_v3	1995467	1995468	Pf3D7_11_v3-1995467-1995468	1	+
Pf3D7_11_v3	1995513	1995514	Pf3D7_11_v3-1995513-1995514	1	+
Pf3D7_11_v3	1995685	1995686	Pf3D7_11_v3-1995685-1995686	1	+
Pf3D7_11_v3	1995686	1995687	Pf3D7_11_v3-1995686-1995687	1	+
Pf3D7_11_v3	1995689	1995690	Pf3D7_11_v3-1995689-1995690	1	+
Pf3D7_11_v3	1995761	1995762	Pf3D7_11_v3-1995761-1995762	1	+
Pf3D7_11_v3	1995792	1995793	Pf3D7_11_v3-1995792-1995793	1	+
Pf3D7_11_v3	1995823	1995824	Pf3D7_11_v3-1995823-1995824	1	+
Pf3D7_11_v3	1995842	1995843	Pf3D7_11_v3-1995842-1995843	1	+
Pf3D7_11_v3	1995873	1995874	Pf3D7_11_v3-1995873-1995874	1	+
Pf3D7_11_v3	1995899	1995900	Pf3D7_11_v3-1995899-1995900	1	+
Pf3D7_11_v3	1995901	1995902	Pf3D7_11_v3-1995901-1995902	1	+
Pf3D7_11_v3	1995938	1995939	Pf3D7_11_v3-1995938-1995939	1	+
Pf3D7_11_v3	1995947	1995948	Pf3D7_11_v3-1995947-1995948	1	+
Pf3D7_11_v3	1995962	1995963	Pf3D7_11_v3-1995962-1995963	1	+
Pf3D7_11_v3	1995966	1995967	Pf3D7_11_v3-1995966-1995967	1	+
Pf3D7_11_v3	1995968	1995969	Pf3D7_11_v3-1995968-1995969	1	+
Pf3D7_11_v3	1996022	1996023	Pf3D7_11_v3-1996022-1996023	1	+
Pf3D7_11_v3	1996074	1996075	Pf3D7_11_v3-1996074-1996075	1	+
Pf3D7_11_v3	1996431	1996432	Pf3D7_11_v3-1996431-1996432	1	+
Pf3D7_11_v3	1996438	1996439	Pf3D7_11_v3-1996438-1996439	1	+
Pf3D7_11_v3	1996508	1996509	Pf3D7_11_v3-1996508-1996509	1	+
Pf3D7_11_v3	1996536	1996537	Pf3D7_11_v3-1996536-1996537	1	+
Pf3D7_11_v3	1996601	1996602	Pf3D7_11_v3-1996601-1996602	1	+
Pf3D7_11_v3	1996766	1996767	Pf3D7_11_v3-1996766-1996767	1	+
Pf3D7_11_v3	1996779	1996780	Pf3D7_11_v3-1996779-1996780	1	+
Pf3D7_11_v3	1996833	1996834	Pf3D7_11_v3-1996833-1996834	1	+
Pf3D7_11_v3	1996866	1996867	Pf3D7_11_v3-1996866-1996867	1	+
Pf3D7_11_v3	1996893	1996894	Pf3D7_11_v3-1996893-1996894	1	+
Pf3D7_11_v3	1996952	1996953	Pf3D7_11_v3-1996952-1996953	1	+
Pf3D7_11_v3	1997151	1997152	Pf3D7_11_v3-1997151-1997152	1	+
Pf3D7_11_v3	1997160	1997161	Pf3D7_11_v3-1997160-1997161	1	+
Pf3D7_11_v3	1997405	1997406	Pf3D7_11_v3-1997405-1997406	1	+
Pf3D7_11_v3	1997416	1997417	Pf3D7_11_v3-1997416-1997417	1	+
Pf3D7_11_v3	1997808	1997809	Pf3D7_11_v3-1997808-1997809	1	+
Pf3D7_11_v3	1998894	1998895	Pf3D7_11_v3-1998894-1998895	1	+
Pf3D7_11_v3	1998899	1998900	Pf3D7_11_v3-1998899-1998900	1	+
Pf3D7_11_v3	1998920	1998921	Pf3D7_11_v3-1998920-1998921	1	+
Pf3D7_11_v3	1999037	1999038	Pf3D7_11_v3-1999037-1999038	1	+
Pf3D7_11_v3	1999052	1999053	Pf3D7_11_v3-1999052-1999053	1	+
Pf3D7_11_v3	1999123	1999124	Pf3D7_11_v3-1999123-1999124	1	+
Pf3D7_11_v3	1999320	1999321	Pf3D7_11_v3-1999320-1999321	1	+
Pf3D7_11_v3	2000843	2000844	Pf3D7_11_v3-2000843-2000844	1	+
Pf3D7_11_v3	2000883	2000884	Pf3D7_11_v3-2000883-2000884	1	+
Pf3D7_11_v3	2000942	2000943	Pf3D7_11_v3-2000942-2000943	1	+
Pf3D7_11_v3	2001018	2001019	Pf3D7_11_v3-2001018-2001019	1	+
Pf3D7_11_v3	2001031	2001032	Pf3D7_11_v3-2001031-2001032	1	+
Pf3D7_11_v3	2001078	2001079	Pf3D7_11_v3-2001078-2001079	1	+	[ID=PF3D7_1149600;feature=gene;description=DnaJ protein, putative;]
Pf3D7_11_v3	2001088	2001089	Pf3D7_11_v3-2001088-2001089	1	+	[ID=PF3D7_1149600;feature=gene;description=DnaJ protein, putative;]
Pf3D7_11_v3	2001093	2001094	Pf3D7_11_v3-2001093-2001094	1	+	[ID=PF3D7_1149600;feature=gene;description=DnaJ protein, putative;]
Pf3D7_11_v3	2001117	2001118	Pf3D7_11_v3-2001117-2001118	1	+	[ID=PF3D7_1149600;feature=gene;description=DnaJ protein, putative;]
Pf3D7_11_v3	2001303	2001304	Pf3D7_11_v3-2001303-2001304	1	+	[ID=PF3D7_1149600;feature=gene;description=DnaJ protein, putative;]
Pf3D7_11_v3	2001307	2001308	Pf3D7_11_v3-2001307-2001308	1	+	[ID=PF3D7_1149600;feature=gene;description=DnaJ protein, putative;]
Pf3D7_11_v3	2001311	2001312	Pf3D7_11_v3-2001311-2001312	1	+	[ID=PF3D7_1149600;feature=gene;description=DnaJ protein, putative;]
Pf3D7_11_v3	2001316	2001317	Pf3D7_11_v3-2001316-2001317	1	+	[ID=PF3D7_1149600;feature=gene;description=DnaJ protein, putative;]
Pf3D7_11_v3	2001344	2001345	Pf3D7_11_v3-2001344-2001345	1	+	[ID=PF3D7_1149600;feature=gene;description=DnaJ protein, putative;]
Pf3D7_11_v3	2001557	2001558	Pf3D7_11_v3-2001557-2001558	1	+	[ID=PF3D7_1149600;feature=gene;description=DnaJ protein, putative;]
Pf3D7_11_v3	2001758	2001759	Pf3D7_11_v3-2001758-2001759	1	+	[ID=PF3D7_1149600;feature=gene;description=DnaJ protein, putative;]
Pf3D7_11_v3	2001846	2001847	Pf3D7_11_v3-2001846-2001847	1	+	[ID=PF3D7_1149600;feature=gene;description=DnaJ protein, putative;]
Pf3D7_11_v3	2001910	2001911	Pf3D7_11_v3-2001910-2001911	1	+	[ID=PF3D7_1149600;feature=gene;description=DnaJ protein, putative;]
Pf3D7_11_v3	2001962	2001963	Pf3D7_11_v3-2001962-2001963	1	+	[ID=PF3D7_1149600;feature=gene;description=DnaJ protein, putative;]
Pf3D7_11_v3	2002063	2002064	Pf3D7_11_v3-2002063-2002064	1	+	[ID=PF3D7_1149600;feature=gene;description=DnaJ protein, putative;]
Pf3D7_11_v3	2002481	2002482	Pf3D7_11_v3-2002481-2002482	1	+	[ID=PF3D7_1149600;feature=gene;description=DnaJ protein, putative;]
Pf3D7_11_v3	2002486	2002487	Pf3D7_11_v3-2002486-2002487	1	+	[ID=PF3D7_1149600;feature=gene;description=DnaJ protein, putative;]
Pf3D7_11_v3	2002526	2002527	Pf3D7_11_v3-2002526-2002527	1	+	[ID=PF3D7_1149600;feature=gene;description=DnaJ protein, putative;]
Pf3D7_11_v3	2002781	2002782	Pf3D7_11_v3-2002781-2002782	1	+	[ID=PF3D7_1149600;feature=gene;description=DnaJ protein, putative;]
Pf3D7_11_v3	2002900	2002901	Pf3D7_11_v3-2002900-2002901	1	+	[ID=PF3D7_1149600;feature=gene;description=DnaJ protein, putative;]
Pf3D7_11_v3	2002901	2002902	Pf3D7_11_v3-2002901-2002902	1	+	[ID=PF3D7_1149600;feature=gene;description=DnaJ protein, putative;]
Pf3D7_11_v3	2002932	2002933	Pf3D7_11_v3-2002932-2002933	1	+	[ID=PF3D7_1149600;feature=gene;description=DnaJ protein, putative;]
Pf3D7_11_v3	2002959	2002960	Pf3D7_11_v3-2002959-2002960	1	+	[ID=PF3D7_1149600;feature=gene;description=DnaJ protein, putative;]
Pf3D7_11_v3	2003002	2003003	Pf3D7_11_v3-2003002-2003003	1	+	[ID=PF3D7_1149600;feature=gene;description=DnaJ protein, putative;]
Pf3D7_11_v3	2003006	2003007	Pf3D7_11_v3-2003006-2003007	1	+	[ID=PF3D7_1149600;feature=gene;description=DnaJ protein, putative;]
Pf3D7_11_v3	2003007	2003008	Pf3D7_11_v3-2003007-2003008	1	+	[ID=PF3D7_1149600;feature=gene;description=DnaJ protein, putative;]
Pf3D7_11_v3	2003008	2003009	Pf3D7_11_v3-2003008-2003009	1	+	[ID=PF3D7_1149600;feature=gene;description=DnaJ protein, putative;]
Pf3D7_11_v3	2003227	2003228	Pf3D7_11_v3-2003227-2003228	1	+	[ID=PF3D7_1149600;feature=gene;description=DnaJ protein, putative;]
Pf3D7_11_v3	2003302	2003303	Pf3D7_11_v3-2003302-2003303	1	+	[ID=PF3D7_1149600;feature=gene;description=DnaJ protein, putative;]
Pf3D7_11_v3	2003311	2003312	Pf3D7_11_v3-2003311-2003312	1	+	[ID=PF3D7_1149600;feature=gene;description=DnaJ protein, putative;]
Pf3D7_11_v3	2003318	2003319	Pf3D7_11_v3-2003318-2003319	1	+
Pf3D7_11_v3	2003322	2003323	Pf3D7_11_v3-2003322-2003323	1	+
Pf3D7_13_v3	2770462	2770463	Pf3D7_13_v3-2770462-2770463	1	+	[ID=PF3D7_1369500;feature=gene;description=conserved protein, unknown function;]
Pf3D7_13_v3	2770579	2770580	Pf3D7_13_v3-2770579-2770580	1	+	[ID=PF3D7_1369500;feature=gene;description=conserved protein, unknown function;]
Pf3D7_13_v3	2770886	2770887	Pf3D7_13_v3-2770886-2770887	1	+	[ID=PF3D7_1369500;feature=gene;description=conserved protein, unknown function;]
Pf3D7_13_v3	2772398	2772399	Pf3D7_13_v3-2772398-2772399	1	+	[ID=PF3D7_1369500;feature=gene;description=conserved protein, unknown function;]
Pf3D7_13_v3	2774204	2774205	Pf3D7_13_v3-2774204-2774205	1	+	[ID=PF3D7_1369600;feature=gene;description=conserved Plasmodium protein, unknown function;]
Pf3D7_13_v3	2774262	2774263	Pf3D7_13_v3-2774262-2774263	1	+	[ID=PF3D7_1369600;feature=gene;description=conserved Plasmodium protein, unknown function;]
Pf3D7_13_v3	2774493	2774494	Pf3D7_13_v3-2774493-2774494	1	+	[ID=PF3D7_1369600;feature=gene;description=conserved Plasmodium protein, unknown function;]
Pf3D7_13_v3	2775679	2775680	Pf3D7_13_v3-2775679-2775680	1	+	[ID=PF3D7_1369600;feature=gene;description=conserved Plasmodium protein, unknown function;]
Pf3D7_13_v3	2775995	2775996	Pf3D7_13_v3-2775995-2775996	1	+	[ID=PF3D7_1369600;feature=gene;description=conserved Plasmodium protein, unknown function;]
Pf3D7_13_v3	2776026	2776027	Pf3D7_13_v3-2776026-2776027	1	+	[ID=PF3D7_1369600;feature=gene;description=conserved Plasmodium protein, unknown function;]
Pf3D7_13_v3	2776233	2776234	Pf3D7_13_v3-2776233-2776234	1	+	[ID=PF3D7_1369600;feature=gene;description=conserved Plasmodium protein, unknown function;]
Pf3D7_13_v3	2776396	2776397	Pf3D7_13_v3-2776396-2776397	1	+	[ID=PF3D7_1369600;feature=gene;description=conserved Plasmodium protein, unknown function;]
Pf3D7_13_v3	2778880	2778881	Pf3D7_13_v3-2778880-2778881	1	+	[ID=PF3D7_1369700;feature=gene;description="U2 small nuclear ribonucleoprotein A', putative";]
Pf3D7_13_v3	2779076	2779077	Pf3D7_13_v3-2779076-2779077	1	+
Pf3D7_13_v3	2779115	2779116	Pf3D7_13_v3-2779115-2779116	1	+
Pf3D7_13_v3	2779800	2779801	Pf3D7_13_v3-2779800-2779801	1	+
Pf3D7_13_v3	2779816	2779817	Pf3D7_13_v3-2779816-2779817	1	+
Pf3D7_13_v3	2780442	2780443	Pf3D7_13_v3-2780442-2780443	1	+
Pf3D7_13_v3	2780526	2780527	Pf3D7_13_v3-2780526-2780527	1	+
Pf3D7_13_v3	2780548	2780549	Pf3D7_13_v3-2780548-2780549	1	+
Pf3D7_13_v3	2780674	2780675	Pf3D7_13_v3-2780674-2780675	1	+
Pf3D7_13_v3	2780711	2780712	Pf3D7_13_v3-2780711-2780712	1	+
Pf3D7_13_v3	2780859	2780860	Pf3D7_13_v3-2780859-2780860	1	+
Pf3D7_13_v3	2781612	2781613	Pf3D7_13_v3-2781612-2781613	1	+
Pf3D7_13_v3	2781773	2781774	Pf3D7_13_v3-2781773-2781774	1	+
Pf3D7_13_v3	2782068	2782069	Pf3D7_13_v3-2782068-2782069	1	+
Pf3D7_13_v3	2782070	2782071	Pf3D7_13_v3-2782070-2782071	1	+
Pf3D7_13_v3	2782157	2782158	Pf3D7_13_v3-2782157-2782158	1	+
Pf3D7_13_v3	2782266	2782267	Pf3D7_13_v3-2782266-2782267	1	+
Pf3D7_13_v3	2782372	2782373	Pf3D7_13_v3-2782372-2782373	1	+
Pf3D7_13_v3	2783724	2783725	Pf3D7_13_v3-2783724-2783725	1	+
Pf3D7_13_v3	2784197	2784198	Pf3D7_13_v3-2784197-2784198	1	+
Pf3D7_13_v3	2784280	2784281	Pf3D7_13_v3-2784280-2784281	1	+
Pf3D7_13_v3	2784301	2784302	Pf3D7_13_v3-2784301-2784302	1	+
Pf3D7_13_v3	2784612	2784613	Pf3D7_13_v3-2784612-2784613	1	+
Pf3D7_13_v3	2784768	2784769	Pf3D7_13_v3-2784768-2784769	1	+
Pf3D7_13_v3	2784955	2784956	Pf3D7_13_v3-2784955-2784956	1	+
Pf3D7_13_v3	2785450	2785451	Pf3D7_13_v3-2785450-2785451	1	+
Pf3D7_13_v3	2785960	2785961	Pf3D7_13_v3-2785960-2785961	1	+
Pf3D7_13_v3	2785994	2785995	Pf3D7_13_v3-2785994-2785995	1	+
Pf3D7_13_v3	2786403	2786404	Pf3D7_13_v3-2786403-2786404	1	+
Pf3D7_13_v3	2787489	2787490	Pf3D7_13_v3-2787489-2787490	1	+
Pf3D7_13_v3	2787497	2787498	Pf3D7_13_v3-2787497-2787498	1	+
Pf3D7_13_v3	2787975	2787976	Pf3D7_13_v3-2787975-2787976	1	+	[ID=PF3D7_1370300;feature=gene;description=membrane'+associated'+histidine-rich'+protein'+1;]
Pf3D7_13_v3	2788184	2788185	Pf3D7_13_v3-2788184-2788185	1	+	[ID=PF3D7_1370300;feature=gene;description=membrane'+associated'+histidine-rich'+protein'+1;]
Pf3D7_13_v3	2788578	2788579	Pf3D7_13_v3-2788578-2788579	1	+	[ID=PF3D7_1370300;feature=gene;description=membrane'+associated'+histidine-rich'+protein'+1;]
Pf3D7_13_v3	2790369	2790370	Pf3D7_13_v3-2790369-2790370	1	+
Pf3D7_13_v3	2790771	2790772	Pf3D7_13_v3-2790771-2790772	1	+
Pf3D7_13_v3	2791053	2791054	Pf3D7_13_v3-2791053-2791054	1	+
Pf3D7_13_v3	2792107	2792108	Pf3D7_13_v3-2792107-2792108	1	+
Pf3D7_13_v3	2792126	2792127	Pf3D7_13_v3-2792126-2792127	1	+
Pf3D7_13_v3	2792135	2792136	Pf3D7_13_v3-2792135-2792136	1	+
Pf3D7_13_v3	2792366	2792367	Pf3D7_13_v3-2792366-2792367	1	+
Pf3D7_13_v3	2792371	2792372	Pf3D7_13_v3-2792371-2792372	1	+
Pf3D7_13_v3	2792389	2792390	Pf3D7_13_v3-2792389-2792390	1	+
Pf3D7_13_v3	2792607	2792608	Pf3D7_13_v3-2792607-2792608	1	+
Pf3D7_13_v3	2792747	2792748	Pf3D7_13_v3-2792747-2792748	1	+
Pf3D7_13_v3	2794277	2794278	Pf3D7_13_v3-2794277-2794278	1	+	[ID=PF3D7_1370500;feature=gene;description=non-coding'+RNA;]
Pf3D7_13_v3	2794520	2794521	Pf3D7_13_v3-2794520-2794521	1	+	[ID=PF3D7_1370500;feature=gene;description=non-coding'+RNA;]
Pf3D7_13_v3	2794538	2794539	Pf3D7_13_v3-2794538-2794539	1	+	[ID=PF3D7_1370500;feature=gene;description=non-coding'+RNA;]
Pf3D7_13_v3	2794591	2794592	Pf3D7_13_v3-2794591-2794592	1	+	[ID=PF3D7_1370500;feature=gene;description=non-coding'+RNA;]
Pf3D7_13_v3	2794811	2794812	Pf3D7_13_v3-2794811-2794812	1	+	[ID=PF3D7_1370500;feature=gene;description=non-coding'+RNA;]
Pf3D7_13_v3	2795125	2795126	Pf3D7_13_v3-2795125-2795126	1	+
Pf3D7_13_v3	2795302	2795303	Pf3D7_13_v3-2795302-2795303	1	+
Pf3D7_13_v3	2795387	2795388	Pf3D7_13_v3-2795387-2795388	1	+
Pf3D7_13_v3	2795421	2795422	Pf3D7_13_v3-2795421-2795422	1	+
Pf3D7_13_v3	2795472	2795473	Pf3D7_13_v3-2795472-2795473	1	+
Pf3D7_13_v3	2795475	2795476	Pf3D7_13_v3-2795475-2795476	1	+
Pf3D7_13_v3	2795624	2795625	Pf3D7_13_v3-2795624-2795625	1	+
Pf3D7_13_v3	2795852	2795853	Pf3D7_13_v3-2795852-2795853	1	+
Pf3D7_13_v3	2796479	2796480	Pf3D7_13_v3-2796479-2796480	1	+	[ID=PF3D7_1370800;feature=gene;description=non-coding'+RNA;]
Pf3D7_13_v3	2797220	2797221	Pf3D7_13_v3-2797220-2797221	1	+
Pf3D7_13_v3	2797336	2797337	Pf3D7_13_v3-2797336-2797337	1	+
Pf3D7_13_v3	2797350	2797351	Pf3D7_13_v3-2797350-2797351	1	+
Pf3D7_13_v3	2798641	2798642	Pf3D7_13_v3-2798641-2798642	1	+
Pf3D7_13_v3	2798725	2798726	Pf3D7_13_v3-2798725-2798726	1	+
Pf3D7_13_v3	2799780	2799781	Pf3D7_13_v3-2799780-2799781	1	+
Pf3D7_13_v3	2799832	2799833	Pf3D7_13_v3-2799832-2799833	1	+
Pf3D7_13_v3	2799892	2799893	Pf3D7_13_v3-2799892-2799893	1	+
Pf3D7_13_v3	2802154	2802155	Pf3D7_13_v3-2802154-2802155	1	+
Pf3D7_13_v3	2802326	2802327	Pf3D7_13_v3-2802326-2802327	1	+
Pf3D7_13_v3	2802370	2802371	Pf3D7_13_v3-2802370-2802371	1	+
Pf3D7_13_v3	2802403	2802404	Pf3D7_13_v3-2802403-2802404	1	+
Pf3D7_13_v3	2802407	2802408	Pf3D7_13_v3-2802407-2802408	1	+
Pf3D7_13_v3	2802495	2802496	Pf3D7_13_v3-2802495-2802496	1	+
Pf3D7_13_v3	2802991	2802992	Pf3D7_13_v3-2802991-2802992	1	+	[ID=PF3D7_1371300;feature=gene;description=28S'+ribosomal'+RNA;]
Pf3D7_13_v3	2803095	2803096	Pf3D7_13_v3-2803095-2803096	1	+	[ID=PF3D7_1371300;feature=gene;description=28S'+ribosomal'+RNA;]
Pf3D7_13_v3	2803416	2803417	Pf3D7_13_v3-2803416-2803417	1	+	[ID=PF3D7_1371300;feature=gene;description=28S'+ribosomal'+RNA;]
Pf3D7_13_v3	2805512	2805513	Pf3D7_13_v3-2805512-2805513	1	+	[ID=PF3D7_1371300;feature=gene;description=28S'+ribosomal'+RNA;]
Pf3D7_13_v3	2806224	2806225	Pf3D7_13_v3-2806224-2806225	1	+	[ID=PF3D7_1371300;feature=gene;description=28S'+ribosomal'+RNA;]
Pf3D7_13_v3	2806664	2806665	Pf3D7_13_v3-2806664-2806665	1	+	[ID=PF3D7_1371300;feature=gene;description=28S'+ribosomal'+RNA;]
Pf3D7_13_v3	2806760	2806761	Pf3D7_13_v3-2806760-2806761	1	+	[ID=PF3D7_1371300;feature=gene;description=28S'+ribosomal'+RNA;]
Pf3D7_13_v3	2806763	2806764	Pf3D7_13_v3-2806763-2806764	1	+	[ID=PF3D7_1371300;feature=gene;description=28S'+ribosomal'+RNA;]
Pf3D7_13_v3	2806797	2806798	Pf3D7_13_v3-2806797-2806798	1	+	[ID=PF3D7_1371300;feature=gene;description=28S'+ribosomal'+RNA;]
Pf3D7_13_v3	2806814	2806815	Pf3D7_13_v3-2806814-2806815	1	+	[ID=PF3D7_1371300;feature=gene;description=28S'+ribosomal'+RNA;]
Pf3D7_13_v3	2806825	2806826	Pf3D7_13_v3-2806825-2806826	1	+	[ID=PF3D7_1371300;feature=gene;description=28S'+ribosomal'+RNA;]
Pf3D7_13_v3	2806833	2806834	Pf3D7_13_v3-2806833-2806834	1	+	[ID=PF3D7_1371300;feature=gene;description=28S'+ribosomal'+RNA;]
Pf3D7_13_v3	2806839	2806840	Pf3D7_13_v3-2806839-2806840	1	+	[ID=PF3D7_1371300;feature=gene;description=28S'+ribosomal'+RNA;]
Pf3D7_13_v3	2806840	2806841	Pf3D7_13_v3-2806840-2806841	1	+	[ID=PF3D7_1371300;feature=gene;description=28S'+ribosomal'+RNA;]
Pf3D7_13_v3	2806844	2806845	Pf3D7_13_v3-2806844-2806845	1	+	[ID=PF3D7_1371300;feature=gene;description=28S'+ribosomal'+RNA;]
Pf3D7_13_v3	2806846	2806847	Pf3D7_13_v3-2806846-2806847	1	+	[ID=PF3D7_1371300;feature=gene;description=28S'+ribosomal'+RNA;]
Pf3D7_13_v3	2806849	2806850	Pf3D7_13_v3-2806849-2806850	1	+	[ID=PF3D7_1371300;feature=gene;description=28S'+ribosomal'+RNA;]
Pf3D7_13_v3	2807080	2807081	Pf3D7_13_v3-2807080-2807081	1	+	[ID=PF3D7_1371300;feature=gene;description=28S'+ribosomal'+RNA;]
Pf3D7_13_v3	2807295	2807296	Pf3D7_13_v3-2807295-2807296	1	+
Pf3D7_13_v3	2807299	2807300	Pf3D7_13_v3-2807299-2807300	1	+
Pf3D7_13_v3	2809159	2809160	Pf3D7_13_v3-2809159-2809160	1	+	[ID=PF3D7_1371500;feature=gene;description=probable protein, unknown function;]
Pf3D7_13_v3	2810763	2810764	Pf3D7_13_v3-2810763-2810764	1	+
Pf3D7_13_v3	2811819	2811820	Pf3D7_13_v3-2811819-2811820	1	+	[ID=PF3D7_1371600;feature=gene;description=erythrocyte binding like protein 1, pseudogene;]
Pf3D7_13_v3	2812368	2812369	Pf3D7_13_v3-2812368-2812369	1	+	[ID=PF3D7_1371600;feature=gene;description=erythrocyte binding like protein 1, pseudogene;]
Pf3D7_13_v3	2812680	2812681	Pf3D7_13_v3-2812680-2812681	1	+	[ID=PF3D7_1371600;feature=gene;description=erythrocyte binding like protein 1, pseudogene;]
Pf3D7_13_v3	2813134	2813135	Pf3D7_13_v3-2813134-2813135	1	+	[ID=PF3D7_1371600;feature=gene;description=erythrocyte binding like protein 1, pseudogene;]
Pf3D7_13_v3	2813282	2813283	Pf3D7_13_v3-2813282-2813283	1	+	[ID=PF3D7_1371600;feature=gene;description=erythrocyte binding like protein 1, pseudogene;]
Pf3D7_13_v3	2813774	2813775	Pf3D7_13_v3-2813774-2813775	1	+	[ID=PF3D7_1371600;feature=gene;description=erythrocyte binding like protein 1, pseudogene;]
Pf3D7_13_v3	2814341	2814342	Pf3D7_13_v3-2814341-2814342	1	+	[ID=PF3D7_1371600;feature=gene;description=erythrocyte binding like protein 1, pseudogene;]
Pf3D7_13_v3	2814739	2814740	Pf3D7_13_v3-2814739-2814740	1	+	[ID=PF3D7_1371600;feature=gene;description=erythrocyte binding like protein 1, pseudogene;]
Pf3D7_13_v3	2815286	2815287	Pf3D7_13_v3-2815286-2815287	1	+	[ID=PF3D7_1371600;feature=gene;description=erythrocyte binding like protein 1, pseudogene;]
Pf3D7_13_v3	2815671	2815672	Pf3D7_13_v3-2815671-2815672	1	+	[ID=PF3D7_1371600;feature=gene;description=erythrocyte binding like protein 1, pseudogene;]
Pf3D7_13_v3	2815818	2815819	Pf3D7_13_v3-2815818-2815819	1	+	[ID=PF3D7_1371600;feature=gene;description=erythrocyte binding like protein 1, pseudogene;]
Pf3D7_13_v3	2815837	2815838	Pf3D7_13_v3-2815837-2815838	1	+	[ID=PF3D7_1371600;feature=gene;description=erythrocyte binding like protein 1, pseudogene;]
Pf3D7_13_v3	2816051	2816052	Pf3D7_13_v3-2816051-2816052	1	+	[ID=PF3D7_1371600;feature=gene;description=erythrocyte binding like protein 1, pseudogene;]
Pf3D7_13_v3	2816177	2816178	Pf3D7_13_v3-2816177-2816178	1	+	[ID=PF3D7_1371600;feature=gene;description=erythrocyte binding like protein 1, pseudogene;]
Pf3D7_13_v3	2816265	2816266	Pf3D7_13_v3-2816265-2816266	1	+	[ID=PF3D7_1371600;feature=gene;description=erythrocyte binding like protein 1, pseudogene;]
Pf3D7_13_v3	2816428	2816429	Pf3D7_13_v3-2816428-2816429	1	+	[ID=PF3D7_1371600;feature=gene;description=erythrocyte binding like protein 1, pseudogene;]
Pf3D7_13_v3	2816839	2816840	Pf3D7_13_v3-2816839-2816840	1	+	[ID=PF3D7_1371600;feature=gene;description=erythrocyte binding like protein 1, pseudogene;]
Pf3D7_13_v3	2817120	2817121	Pf3D7_13_v3-2817120-2817121	1	+	[ID=PF3D7_1371600;feature=gene;description=erythrocyte binding like protein 1, pseudogene;]
Pf3D7_13_v3	2817256	2817257	Pf3D7_13_v3-2817256-2817257	1	+	[ID=PF3D7_1371600;feature=gene;description=erythrocyte binding like protein 1, pseudogene;]
Pf3D7_13_v3	2818346	2818347	Pf3D7_13_v3-2818346-2818347	1	+	[ID=PF3D7_1371600;feature=gene;description=erythrocyte binding like protein 1, pseudogene;]
Pf3D7_13_v3	2818797	2818798	Pf3D7_13_v3-2818797-2818798	1	+	[ID=PF3D7_1371600;feature=gene;description=erythrocyte binding like protein 1, pseudogene;]
Pf3D7_13_v3	2819268	2819269	Pf3D7_13_v3-2819268-2819269	1	+	[ID=PF3D7_1371600;feature=gene;description=erythrocyte binding like protein 1, pseudogene;]
Pf3D7_13_v3	2819333	2819334	Pf3D7_13_v3-2819333-2819334	1	+	[ID=PF3D7_1371600;feature=gene;description=erythrocyte binding like protein 1, pseudogene;]
Pf3D7_13_v3	2821542	2821543	Pf3D7_13_v3-2821542-2821543	1	+	[ID=PF3D7_1371700;feature=gene;description="serine/threonine protein kinase, FIKK family";]
Pf3D7_13_v3	2822029	2822030	Pf3D7_13_v3-2822029-2822030	1	+	[ID=PF3D7_1371700;feature=gene;description="serine/threonine protein kinase, FIKK family";]
Pf3D7_13_v3	2823426	2823427	Pf3D7_13_v3-2823426-2823427	1	+
Pf3D7_13_v3	2823496	2823497	Pf3D7_13_v3-2823496-2823497	1	+
Pf3D7_13_v3	2824324	2824325	Pf3D7_13_v3-2824324-2824325	1	+	[ID=PF3D7_1371800;feature=gene;description=Plasmodium exported protein, unknown function;]
Pf3D7_13_v3	2824450	2824451	Pf3D7_13_v3-2824450-2824451	1	+	[ID=PF3D7_1371800;feature=gene;description=Plasmodium exported protein, unknown function;]
Pf3D7_13_v3	2824459	2824460	Pf3D7_13_v3-2824459-2824460	1	+	[ID=PF3D7_1371800;feature=gene;description=Plasmodium exported protein, unknown function;]
Pf3D7_13_v3	2824482	2824483	Pf3D7_13_v3-2824482-2824483	1	+	[ID=PF3D7_1371800;feature=gene;description=Plasmodium exported protein, unknown function;]
Pf3D7_13_v3	2824483	2824484	Pf3D7_13_v3-2824483-2824484	1	+	[ID=PF3D7_1371800;feature=gene;description=Plasmodium exported protein, unknown function;]
Pf3D7_13_v3	2824492	2824493	Pf3D7_13_v3-2824492-2824493	1	+	[ID=PF3D7_1371800;feature=gene;description=Plasmodium exported protein, unknown function;]
Pf3D7_13_v3	2824498	2824499	Pf3D7_13_v3-2824498-2824499	1	+	[ID=PF3D7_1371800;feature=gene;description=Plasmodium exported protein, unknown function;]
Pf3D7_13_v3	2824569	2824570	Pf3D7_13_v3-2824569-2824570	1	+	[ID=PF3D7_1371800;feature=gene;description=Plasmodium exported protein, unknown function;]
Pf3D7_13_v3	2824612	2824613	Pf3D7_13_v3-2824612-2824613	1	+	[ID=PF3D7_1371800;feature=gene;description=Plasmodium exported protein, unknown function;]
Pf3D7_13_v3	2824623	2824624	Pf3D7_13_v3-2824623-2824624	1	+	[ID=PF3D7_1371800;feature=gene;description=Plasmodium exported protein, unknown function;]
Pf3D7_13_v3	2824676	2824677	Pf3D7_13_v3-2824676-2824677	1	+	[ID=PF3D7_1371800;feature=gene;description=Plasmodium exported protein, unknown function;]
Pf3D7_13_v3	2825063	2825064	Pf3D7_13_v3-2825063-2825064	1	+	[ID=PF3D7_1371800;feature=gene;description=Plasmodium exported protein, unknown function;]
Pf3D7_13_v3	2825512	2825513	Pf3D7_13_v3-2825512-2825513	1	+	[ID=PF3D7_1371800;feature=gene;description=Plasmodium exported protein, unknown function;]
Pf3D7_13_v3	2825799	2825800	Pf3D7_13_v3-2825799-2825800	1	+	[ID=PF3D7_1371800;feature=gene;description=Plasmodium exported protein, unknown function;]
Pf3D7_13_v3	2825808	2825809	Pf3D7_13_v3-2825808-2825809	1	+	[ID=PF3D7_1371800;feature=gene;description=Plasmodium exported protein, unknown function;]
Pf3D7_13_v3	2825832	2825833	Pf3D7_13_v3-2825832-2825833	1	+	[ID=PF3D7_1371800;feature=gene;description=Plasmodium exported protein, unknown function;]
Pf3D7_13_v3	2826882	2826883	Pf3D7_13_v3-2826882-2826883	1	+
Pf3D7_13_v3	2828606	2828607	Pf3D7_13_v3-2828606-2828607	1	+
Pf3D7_13_v3	2830117	2830118	Pf3D7_13_v3-2830117-2830118	1	+	[ID=PF3D7_1371900;feature=gene;description=Plasmodium exported protein, unknown function;]
Pf3D7_13_v3	2830433	2830434	Pf3D7_13_v3-2830433-2830434	1	+	[ID=PF3D7_1371900;feature=gene;description=Plasmodium exported protein, unknown function;]
Pf3D7_13_v3	2830569	2830570	Pf3D7_13_v3-2830569-2830570	1	+	[ID=PF3D7_1371900;feature=gene;description=Plasmodium exported protein, unknown function;]
Pf3D7_13_v3	2830799	2830800	Pf3D7_13_v3-2830799-2830800	1	+
Pf3D7_13_v3	2831533	2831534	Pf3D7_13_v3-2831533-2831534	1	+
Pf3D7_13_v3	2833951	2833952	Pf3D7_13_v3-2833951-2833952	1	+	[ID=PF3D7_1372000;feature=gene;description="Plasmodium exported protein (PHISTa), unknown function";]
Pf3D7_13_v3	2834142	2834143	Pf3D7_13_v3-2834142-2834143	1	+	[ID=PF3D7_1372000;feature=gene;description="Plasmodium exported protein (PHISTa), unknown function";]
Pf3D7_13_v3	2834246	2834247	Pf3D7_13_v3-2834246-2834247	1	+	[ID=PF3D7_1372000;feature=gene;description="Plasmodium exported protein (PHISTa), unknown function";]
Pf3D7_13_v3	2834383	2834384	Pf3D7_13_v3-2834383-2834384	1	+
Pf3D7_13_v3	2835348	2835349	Pf3D7_13_v3-2835348-2835349	1	+
Pf3D7_13_v3	2835713	2835714	Pf3D7_13_v3-2835713-2835714	1	+
Pf3D7_13_v3	2836378	2836379	Pf3D7_13_v3-2836378-2836379	1	+
Pf3D7_13_v3	2837468	2837469	Pf3D7_13_v3-2837468-2837469	1	+	[ID=PF3D7_1372100;feature=gene;description="Plasmodium exported protein (PHISTb), unknown function";]
Pf3D7_13_v3	2837703	2837704	Pf3D7_13_v3-2837703-2837704	1	+	[ID=PF3D7_1372100;feature=gene;description="Plasmodium exported protein (PHISTb), unknown function";]
Pf3D7_13_v3	2839303	2839304	Pf3D7_13_v3-2839303-2839304	1	+
Pf3D7_13_v3	2840105	2840106	Pf3D7_13_v3-2840105-2840106	1	+
Pf3D7_13_v3	2840353	2840354	Pf3D7_13_v3-2840353-2840354	1	+
Pf3D7_13_v3	2840364	2840365	Pf3D7_13_v3-2840364-2840365	1	+
Pf3D7_13_v3	2840582	2840583	Pf3D7_13_v3-2840582-2840583	1	+
Pf3D7_13_v3	2842176	2842177	Pf3D7_13_v3-2842176-2842177	1	+
Pf3D7_13_v3	2842648	2842649	Pf3D7_13_v3-2842648-2842649	1	+
Pf3D7_13_v3	2843170	2843171	Pf3D7_13_v3-2843170-2843171	1	+
Pf3D7_13_v3	2843345	2843346	Pf3D7_13_v3-2843345-2843346	1	+
Pf3D7_13_v3	2843380	2843381	Pf3D7_13_v3-2843380-2843381	1	+
Pf3D7_13_v3	2844059	2844060	Pf3D7_13_v3-2844059-2844060	1	+
