# Supplementary material for: Interchromosomal segmental duplication drives translocation and loss of P. falciparum histidine-rich protein 3
Source: eLife. 2024 Oct 7;13:RP93534. doi: 10.7554/eLife.93534 (PMC11458181; doi:10.7554/eLife.93534)
Supplement: Supplementary file 5. — This table contains the results of the nucmer analysis looking for inter-chromosomal exact sequence sharing. Majority of the shared sequence is within the sub-telomere regions with the largest ‘core’ genomic region of a shared sequence is the 11–13 rRNA loci. [file elife-93534-supp5.xlsx]

## Sheet: Table S5 Nucmer results
Supplementary File 5. Nucmer Results. This table contains the results of the nucmer analysis looking for inter-chromosomal exact sequence sharing. Majority of shared sequence is within the sub-telomere regions with the largest 'core' genomic region of shared sequence is the 11-13 rRNA loci
Chromosome=Window's chromosome name in 3D7 Start Position=Window's starting base position (0-based) End Position=Window's ending base position (0-based) Chromosome: Start-End Position=Window's chromosome name, starting, and ending base positions Window Length: Window's length (=End Position - Start Position) Strand (+/-): Positive or negative DNA strand Overlapping Genes: Description of the genes…
Chromosome	Start Position	End Position	Name of Shared Regions	Length	Strand (+/-)	Overlapping Genes
Pf3D7_05_v3	0	23711	Pf3D7_05_v3-0-23711-for__Pf3D7_13_v3-435-24146-for	23711	+	[ID=PF3D7_0500100;feature=gene;description=erythrocyte membrane protein 1, PfEMP1;]
Pf3D7_13_v3	435	24146	Pf3D7_05_v3-0-23711-for__Pf3D7_13_v3-435-24146-for	23711	+	[ID=PF3D7_1300100;feature=gene;description=erythrocyte membrane protein 1, PfEMP1;]
Pf3D7_11_v3	76815	94635	Pf3D7_06_v3-1310156-1327922-rev__Pf3D7_11_v3-76815-94635-for	17820	+	[ID=PF3D7_1101400;feature=gene;description=rifin, pseudogene;],[ID=PF3D7_1101800;feature=gene;description=exported+protein+family+1;],[ID=PF3D7_1101700;feature=gene;description="Pfmc-2TM+Maurer's+cleft+two+transmembrane+protein";],[ID=PF3D7_1101900;feature=gene;description="erythrocyte membrane protein 1 (PfEMP1), pseudogene";],[ID=PF3D7_1101500;feature=gene;description=exported+protein+family+4;…
Pf3D7_06_v3	1310156	1327922	Pf3D7_06_v3-1310156-1327922-rev__Pf3D7_11_v3-76815-94635-for	17766	-	[ID=PF3D7_0631500;feature=gene;description=exported+protein+family+3;],[ID=PF3D7_0631600;feature=gene;description=exported+protein+family+4;],[ID=PF3D7_0631300;feature=gene;description=exported+protein+family+1;],[ID=PF3D7_0631400;feature=gene;description="Pfmc-2TM+Maurer's+cleft+two+transmembrane+protein";],[ID=PF3D7_0631700;feature=gene;description=rifin, pseudogene;],[ID=PF3D7_0631200;feature=…
Pf3D7_06_v3	39344	55145	Pf3D7_06_v3-39344-55145-rev__Pf3D7_10_v3-1584689-1600336-for	15801	-	[ID=PF3D7_0601300;feature=gene;description=exported+protein+family+1;],[ID=PF3D7_0601400;feature=gene;description="erythrocyte membrane protein 1 (PfEMP1), pseudogene";],[ID=PF3D7_0601100;feature=gene;description=exported+protein+family+3;],[ID=PF3D7_0601200;feature=gene;description="Pfmc-2TM+Maurer's+cleft+two+transmembrane+protein";],[ID=PF3D7_0601000;feature=gene;description=exported+protein+f…
Pf3D7_10_v3	1584689	1600336	Pf3D7_06_v3-39344-55145-rev__Pf3D7_10_v3-1584689-1600336-for	15647	+	[ID=PF3D7_1039900;feature=gene;description=exported+protein+family+4;],[ID=PF3D7_1039800;feature=gene;description=exported+protein+family+3;],[ID=PF3D7_1040000;feature=gene;description=rifin;],[ID=PF3D7_1039600;feature=gene;description=exported protein family 1, pseudogene;],[ID=PF3D7_1039400;feature=gene;description="erythrocyte membrane protein 1 (PfEMP1), pseudogene";],[ID=PF3D7_1039700;featur…
Pf3D7_13_v3	2791996	2807398	Pf3D7_11_v3-1918005-1933391-for__Pf3D7_13_v3-2791996-2807398-for	15402	+	[ID=PF3D7_1370800;feature=gene;description=non-coding+RNA;],[ID=PF3D7_1370900;feature=gene;description=non-coding+RNA;],[ID=PF3D7_1371300;feature=gene;description=28S+ribosomal+RNA;],[ID=PF3D7_1371000;feature=gene;description=18S+ribosomal+RNA;],[ID=PF3D7_1371200;feature=gene;description=5.8S+ribosomal+RNA;],[ID=PF3D7_1370500;feature=gene;description=non-coding+RNA;]
Pf3D7_11_v3	1918005	1933391	Pf3D7_11_v3-1918005-1933391-for__Pf3D7_13_v3-2791996-2807398-for	15386	+	[ID=PF3D7_1148200;feature=gene;description=non-coding+RNA;],[ID=PF3D7_1148600;feature=gene;description=18S+ribosomal+RNA;],[ID=PF3D7_1148640;feature=gene;description=28S+ribosomal+RNA;],[ID=PF3D7_1148500;feature=gene;description=non-coding+RNA;],[ID=PF3D7_1148100;feature=gene;description=non-coding+RNA;],[ID=PF3D7_1148620;feature=gene;description=5.8S+ribosomal+RNA;]
Pf3D7_01_v3	575903	590671	Pf3D7_01_v3-575903-590671-rev__Pf3D7_08_v3-58858-73574-for	14768	-	[ID=PF3D7_0115050;feature=gene;description="H/ACA+snoRNA";],[ID=PF3D7_0115150;feature=gene;description=Plasmodium exported protein, unknown function, pseudogene;],[ID=PF3D7_0115000;feature=gene;description="surface-associated+interspersed+protein+1.3+(SURFIN+1.3)";],[ID=PF3D7_0115100;feature=gene;description="Plasmodium exported protein (PHISTa), unknown function";]
Pf3D7_08_v3	58858	73574	Pf3D7_01_v3-575903-590671-rev__Pf3D7_08_v3-58858-73574-for	14716	+	[ID=PF3D7_0800700;feature=gene;description="surface-associated+interspersed+protein+8.3+(SURFIN+8.3)";],[ID=PF3D7_0800600;feature=gene;description="Plasmodium exported protein (PHISTa), unknown function";],[ID=PF3D7_0800650;feature=gene;description="H/ACA+snoRNA";]
Pf3D7_11_v3	77704	90990	Pf3D7_03_v3-1002840-1016093-rev__Pf3D7_11_v3-77704-90990-for	13286	+	[ID=PF3D7_1101400;feature=gene;description=rifin, pseudogene;],[ID=PF3D7_1101800;feature=gene;description=exported+protein+family+1;],[ID=PF3D7_1101700;feature=gene;description="Pfmc-2TM+Maurer's+cleft+two+transmembrane+protein";],[ID=PF3D7_1101900;feature=gene;description="erythrocyte membrane protein 1 (PfEMP1), pseudogene";],[ID=PF3D7_1101500;feature=gene;description=exported+protein+family+4;…
Pf3D7_03_v3	1002840	1016093	Pf3D7_03_v3-1002840-1016093-rev__Pf3D7_11_v3-77704-90990-for	13253	-	[ID=PF3D7_0323900;feature=gene;description="erythrocyte membrane protein 1 (PfEMP1), exon 2, pseudogene";],[ID=PF3D7_0324100;feature=gene;description="Pfmc-2TM+Maurer's+cleft+two+transmembrane+protein";],[ID=PF3D7_0324300;feature=gene;description=exported+protein+family+4;],[ID=PF3D7_0324000;feature=gene;description=exported+protein+family+1;],[ID=PF3D7_0324400;feature=gene;description=rifin;],[I…
Pf3D7_06_v3	43777	56613	Pf3D7_06_v3-1309984-1322767-for__Pf3D7_06_v3-43777-56613-rev	12836	-	[ID=PF3D7_0601300;feature=gene;description=exported+protein+family+1;],[ID=PF3D7_0601400;feature=gene;description="erythrocyte membrane protein 1 (PfEMP1), pseudogene";],[ID=PF3D7_0601100;feature=gene;description=exported+protein+family+3;],[ID=PF3D7_0601200;feature=gene;description="Pfmc-2TM+Maurer's+cleft+two+transmembrane+protein";]
Pf3D7_06_v3	1309984	1322767	Pf3D7_06_v3-1309984-1322767-for__Pf3D7_06_v3-43777-56613-rev	12783	+	[ID=PF3D7_0631500;feature=gene;description=exported+protein+family+3;],[ID=PF3D7_0631300;feature=gene;description=exported+protein+family+1;],[ID=PF3D7_0631400;feature=gene;description="Pfmc-2TM+Maurer's+cleft+two+transmembrane+protein";],[ID=PF3D7_0631200;feature=gene;description="erythrocyte membrane protein 1 (PfEMP1), pseudogene";]
Pf3D7_07_v3	42983	55332	Pf3D7_07_v3-42983-55332-for__Pf3D7_11_v3-54213-66520-for	12349	+	[ID=PF3D7_0700700;feature=gene;description=stevor, pseudogene;],[ID=PF3D7_0700900;feature=gene;description=exported protein family 1, pseudogene;],[ID=PF3D7_0701000;feature=gene;description="erythrocyte membrane protein 1 (PfEMP1), pseudogene";],[ID=PF3D7_0700600;feature=gene;description=Plasmodium exported protein, unknown function, pseudogene;],[ID=PF3D7_0700800;feature=gene;description="Pfmc-2…
Pf3D7_11_v3	54213	66520	Pf3D7_07_v3-42983-55332-for__Pf3D7_11_v3-54213-66520-for	12307	+	[ID=PF3D7_1100700;feature=gene;description=stevor, pseudogene;],[ID=PF3D7_1101000;feature=gene;description="erythrocyte membrane protein 1 (PfEMP1), pseudogene";],[ID=PF3D7_1100600;feature=gene;description="Plasmodium exported protein (PHISTa), unknown function, pseudogene";],[ID=PF3D7_1100900;feature=gene;description=exported protein family 1, pseudogene;],[ID=PF3D7_1100800;feature=gene;descript…
Pf3D7_07_v3	59820	71680	Pf3D7_06_v3-1318509-1330317-rev__Pf3D7_07_v3-59820-71680-for	11860	+	[ID=PF3D7_0701600;feature=gene;description="Pfmc-2TM+Maurer's+cleft+two+transmembrane+protein";],[ID=PF3D7_0701300;feature=gene;description=rifin, pseudogene;],[ID=PF3D7_0701500;feature=gene;description=exported+protein+family+3;],[ID=PF3D7_0701200;feature=gene;description=rifin, pseudogene;],[ID=PF3D7_0701400;feature=gene;description=exported protein family 4, pseudogene;]
Pf3D7_06_v3	1318509	1330317	Pf3D7_06_v3-1318509-1330317-rev__Pf3D7_07_v3-59820-71680-for	11808	-	[ID=PF3D7_0631500;feature=gene;description=exported+protein+family+3;],[ID=PF3D7_0631600;feature=gene;description=exported+protein+family+4;],[ID=PF3D7_0631400;feature=gene;description="Pfmc-2TM+Maurer's+cleft+two+transmembrane+protein";],[ID=PF3D7_0631700;feature=gene;description=rifin, pseudogene;],[ID=PF3D7_0631800;feature=gene;description=rifin;]
Pf3D7_01_v3	580670	591906	Pf3D7_01_v3-580670-591906-rev__Pf3D7_08_v3-57645-68834-for	11236	-	[ID=PF3D7_0115200;feature=gene;description=rifin;],[ID=PF3D7_0115050;feature=gene;description="H/ACA+snoRNA";],[ID=PF3D7_0115150;feature=gene;description=Plasmodium exported protein, unknown function, pseudogene;],[ID=PF3D7_0115000;feature=gene;description="surface-associated+interspersed+protein+1.3+(SURFIN+1.3)";],[ID=PF3D7_0115100;feature=gene;description="Plasmodium exported protein (PHISTa),…
Pf3D7_08_v3	57645	68834	Pf3D7_01_v3-580670-591906-rev__Pf3D7_08_v3-57645-68834-for	11189	+	[ID=PF3D7_0800700;feature=gene;description="surface-associated+interspersed+protein+8.3+(SURFIN+8.3)";],[ID=PF3D7_0800600;feature=gene;description="Plasmodium exported protein (PHISTa), unknown function";],[ID=PF3D7_0800650;feature=gene;description="H/ACA+snoRNA";],[ID=PF3D7_0800500;feature=gene;description=rifin;]
Pf3D7_06_v3	45957	56905	Pf3D7_06_v3-1309691-1320562-rev__Pf3D7_06_v3-45957-56905-for	10948	+	[ID=PF3D7_0601300;feature=gene;description=exported+protein+family+1;],[ID=PF3D7_0601400;feature=gene;description="erythrocyte membrane protein 1 (PfEMP1), pseudogene";],[ID=PF3D7_0601200;feature=gene;description="Pfmc-2TM+Maurer's+cleft+two+transmembrane+protein";]
Pf3D7_06_v3	1309691	1320562	Pf3D7_06_v3-1309691-1320562-rev__Pf3D7_06_v3-45957-56905-for	10871	-	[ID=PF3D7_0631300;feature=gene;description=exported+protein+family+1;],[ID=PF3D7_0631400;feature=gene;description="Pfmc-2TM+Maurer's+cleft+two+transmembrane+protein";],[ID=PF3D7_0631200;feature=gene;description="erythrocyte membrane protein 1 (PfEMP1), pseudogene";]
Pf3D7_10_v3	1571998	1582803	Pf3D7_10_v3-1571998-1582803-rev__Pf3D7_11_v3-98503-109305-for	10805	-	[ID=PF3D7_1039200;feature=gene;description=Plasmodium exported protein, unknown function, pseudogene;],[ID=PF3D7_1039100;feature=gene;description=DnaJ protein, putative, pseudogene;]
Pf3D7_11_v3	98503	109305	Pf3D7_10_v3-1571998-1582803-rev__Pf3D7_11_v3-98503-109305-for	10802	+	[ID=PF3D7_1102200;feature=gene;description=DnaJ protein, putative;],[ID=PF3D7_1102100;feature=gene;description=Plasmodium exported protein, unknown function, pseudogene;]
Pf3D7_06_v3	59903	70484	Pf3D7_06_v3-1294680-1305256-for__Pf3D7_06_v3-59903-70484-rev	10581	-	[ID=PF3D7_0601600;feature=gene;description=tetratricopeptide repeat protein, putative;],[ID=PF3D7_0601500;feature=gene;description="Plasmodium exported protein (PHISTb), unknown function";]
Pf3D7_06_v3	1294680	1305256	Pf3D7_06_v3-1294680-1305256-for__Pf3D7_06_v3-59903-70484-rev	10576	+	[ID=PF3D7_0631100;feature=gene;description="Plasmodium exported protein (PHISTb), unknown function";],[ID=PF3D7_0631000;feature=gene;description=tetratricopeptide repeat protein, putative;]
Pf3D7_06_v3	45957	56152	Pf3D7_06_v3-45957-56152-for__Pf3D7_11_v3-84182-94346-for	10195	+	[ID=PF3D7_0601300;feature=gene;description=exported+protein+family+1;],[ID=PF3D7_0601400;feature=gene;description="erythrocyte membrane protein 1 (PfEMP1), pseudogene";],[ID=PF3D7_0601200;feature=gene;description="Pfmc-2TM+Maurer's+cleft+two+transmembrane+protein";]
Pf3D7_11_v3	84182	94346	Pf3D7_06_v3-45957-56152-for__Pf3D7_11_v3-84182-94346-for	10164	+	[ID=PF3D7_1101800;feature=gene;description=exported+protein+family+1;],[ID=PF3D7_1101700;feature=gene;description="Pfmc-2TM+Maurer's+cleft+two+transmembrane+protein";],[ID=PF3D7_1101900;feature=gene;description="erythrocyte membrane protein 1 (PfEMP1), pseudogene";]
Pf3D7_13_v3	1439953	1449350	Pf3D7_13_v3-1430282-1439675-for__Pf3D7_13_v3-1439953-1449350-rev	9397	-	[ID=PF3D7_1335400;feature=gene;description=reticulocyte+binding+protein+2+homologue+a;]
Pf3D7_13_v3	1439953	1449350	Pf3D7_13_v3-1430282-1439675-rev__Pf3D7_13_v3-1439953-1449350-for	9397	+	[ID=PF3D7_1335400;feature=gene;description=reticulocyte+binding+protein+2+homologue+a;]
Pf3D7_13_v3	1430282	1439675	Pf3D7_13_v3-1430282-1439675-for__Pf3D7_13_v3-1439953-1449350-rev	9393	+	[ID=PF3D7_1335300;feature=gene;description=reticulocyte+binding+protein+2+homologue+b;]
Pf3D7_13_v3	1430282	1439675	Pf3D7_13_v3-1430282-1439675-rev__Pf3D7_13_v3-1439953-1449350-for	9393	-	[ID=PF3D7_1335300;feature=gene;description=reticulocyte+binding+protein+2+homologue+b;]
Pf3D7_02_v3	874129	883277	Pf3D7_02_v3-874129-883277-rev__Pf3D7_11_v3-81611-90735-for	9148	-	[ID=PF3D7_0222200;feature=gene;description=exported+protein+family+3;],[ID=PF3D7_0222000;feature=gene;description=exported+protein+family+1;],[ID=PF3D7_0221900;feature=gene;description="erythrocyte membrane protein 1 (PfEMP1), pseudogene";],[ID=PF3D7_0222100;feature=gene;description="Pfmc-2TM+Maurer's+cleft+two+transmembrane+protein";]
Pf3D7_11_v3	81611	90735	Pf3D7_02_v3-874129-883277-rev__Pf3D7_11_v3-81611-90735-for	9124	+	[ID=PF3D7_1101800;feature=gene;description=exported+protein+family+1;],[ID=PF3D7_1101700;feature=gene;description="Pfmc-2TM+Maurer's+cleft+two+transmembrane+protein";],[ID=PF3D7_1101900;feature=gene;description="erythrocyte membrane protein 1 (PfEMP1), pseudogene";],[ID=PF3D7_1101600;feature=gene;description=exported+protein+family+3;]
Pf3D7_01_v3	381	9395	Pf3D7_01_v3-381-9395-for__Pf3D7_11_v3-820-9809-for	9014	+
Pf3D7_11_v3	820	9809	Pf3D7_01_v3-381-9395-for__Pf3D7_11_v3-820-9809-for	8989	+
Pf3D7_02_v3	874129	882933	Pf3D7_02_v3-874129-882933-rev__Pf3D7_06_v3-43783-52573-for	8804	-	[ID=PF3D7_0222200;feature=gene;description=exported+protein+family+3;],[ID=PF3D7_0222000;feature=gene;description=exported+protein+family+1;],[ID=PF3D7_0221900;feature=gene;description="erythrocyte membrane protein 1 (PfEMP1), pseudogene";],[ID=PF3D7_0222100;feature=gene;description="Pfmc-2TM+Maurer's+cleft+two+transmembrane+protein";]
Pf3D7_03_v3	1054442	1063233	Pf3D7_03_v3-1054442-1063233-for__Pf3D7_09_v3-1531932-1540696-for	8791	+
Pf3D7_06_v3	43783	52573	Pf3D7_02_v3-874129-882933-rev__Pf3D7_06_v3-43783-52573-for	8790	+	[ID=PF3D7_0601300;feature=gene;description=exported+protein+family+1;],[ID=PF3D7_0601400;feature=gene;description="erythrocyte membrane protein 1 (PfEMP1), pseudogene";],[ID=PF3D7_0601100;feature=gene;description=exported+protein+family+3;],[ID=PF3D7_0601200;feature=gene;description="Pfmc-2TM+Maurer's+cleft+two+transmembrane+protein";]
Pf3D7_09_v3	1531932	1540696	Pf3D7_03_v3-1054442-1063233-for__Pf3D7_09_v3-1531932-1540696-for	8764	+
Pf3D7_09_v3	1531952	1540559	Pf3D7_09_v3-1531952-1540559-rev__Pf3D7_11_v3-1157-9761-for	8607	-
Pf3D7_11_v3	1157	9761	Pf3D7_09_v3-1531952-1540559-rev__Pf3D7_11_v3-1157-9761-for	8604	+
Pf3D7_06_v3	62145	70484	Pf3D7_06_v3-1294680-1303014-rev__Pf3D7_06_v3-62145-70484-for	8339	+	[ID=PF3D7_0601600;feature=gene;description=tetratricopeptide repeat protein, putative;],[ID=PF3D7_0601500;feature=gene;description="Plasmodium exported protein (PHISTb), unknown function";]
Pf3D7_01_v3	1059	9397	Pf3D7_01_v3-1059-9397-rev__Pf3D7_12_v3-2262649-2270983-for	8338	-
Pf3D7_12_v3	2262649	2270983	Pf3D7_01_v3-1059-9397-rev__Pf3D7_12_v3-2262649-2270983-for	8334	+
Pf3D7_06_v3	1294680	1303014	Pf3D7_06_v3-1294680-1303014-rev__Pf3D7_06_v3-62145-70484-for	8334	-	[ID=PF3D7_0631100;feature=gene;description="Plasmodium exported protein (PHISTb), unknown function";],[ID=PF3D7_0631000;feature=gene;description=tetratricopeptide repeat protein, putative;]
Pf3D7_06_v3	1313776	1322023	Pf3D7_03_v3-1002840-1011045-for__Pf3D7_06_v3-1313776-1322023-for	8247	+	[ID=PF3D7_0631500;feature=gene;description=exported+protein+family+3;],[ID=PF3D7_0631300;feature=gene;description=exported+protein+family+1;],[ID=PF3D7_0631400;feature=gene;description="Pfmc-2TM+Maurer's+cleft+two+transmembrane+protein";],[ID=PF3D7_0631200;feature=gene;description="erythrocyte membrane protein 1 (PfEMP1), pseudogene";]
Pf3D7_11_v3	1493	9703	Pf3D7_11_v3-1493-9703-for__Pf3D7_12_v3-846-9023-for	8210	+
Pf3D7_03_v3	1002840	1011045	Pf3D7_03_v3-1002840-1011045-for__Pf3D7_06_v3-1313776-1322023-for	8205	+	[ID=PF3D7_0323900;feature=gene;description="erythrocyte membrane protein 1 (PfEMP1), exon 2, pseudogene";],[ID=PF3D7_0324100;feature=gene;description="Pfmc-2TM+Maurer's+cleft+two+transmembrane+protein";],[ID=PF3D7_0324000;feature=gene;description=exported+protein+family+1;],[ID=PF3D7_0324200;feature=gene;description=exported+protein+family+3;]
Pf3D7_09_v3	1532011	1540195	Pf3D7_09_v3-1532011-1540195-rev__Pf3D7_12_v3-846-9014-for	8184	-
Pf3D7_12_v3	846	9023	Pf3D7_11_v3-1493-9703-for__Pf3D7_12_v3-846-9023-for	8177	+
Pf3D7_12_v3	846	9014	Pf3D7_09_v3-1532011-1540195-rev__Pf3D7_12_v3-846-9014-for	8168	+
Pf3D7_02_v3	874129	882172	Pf3D7_02_v3-874129-882172-for__Pf3D7_06_v3-1314029-1322023-for	8043	+	[ID=PF3D7_0222200;feature=gene;description=exported+protein+family+3;],[ID=PF3D7_0222000;feature=gene;description=exported+protein+family+1;],[ID=PF3D7_0221900;feature=gene;description="erythrocyte membrane protein 1 (PfEMP1), pseudogene";],[ID=PF3D7_0222100;feature=gene;description="Pfmc-2TM+Maurer's+cleft+two+transmembrane+protein";]
Pf3D7_06_v3	1314029	1322023	Pf3D7_02_v3-874129-882172-for__Pf3D7_06_v3-1314029-1322023-for	7994	+	[ID=PF3D7_0631500;feature=gene;description=exported+protein+family+3;],[ID=PF3D7_0631300;feature=gene;description=exported+protein+family+1;],[ID=PF3D7_0631400;feature=gene;description="Pfmc-2TM+Maurer's+cleft+two+transmembrane+protein";],[ID=PF3D7_0631200;feature=gene;description="erythrocyte membrane protein 1 (PfEMP1), pseudogene";]
Pf3D7_07_v3	62971	70786	Pf3D7_06_v3-39351-47132-for__Pf3D7_07_v3-62971-70786-for	7815	+	[ID=PF3D7_0701300;feature=gene;description=rifin, pseudogene;],[ID=PF3D7_0701500;feature=gene;description=exported+protein+family+3;],[ID=PF3D7_0701400;feature=gene;description=exported protein family 4, pseudogene;]
Pf3D7_01_v3	71722	79528	Pf3D7_01_v3-71722-79528-rev__Pf3D7_10_v3-1587418-1595206-for	7806	-	[ID=PF3D7_0101500;feature=gene;description="erythrocyte membrane protein 1 (PfEMP1), exon 2, pseudogene";],[ID=PF3D7_0101300;feature=gene;description="Pfmc-2TM+Maurer's+cleft+two+transmembrane+protein";],[ID=PF3D7_0101200;feature=gene;description=exported+protein+family+3;],[ID=PF3D7_0101400;feature=gene;description=exported protein family 1, pseudogene;]
Pf3D7_11_v3	77570	85365	Pf3D7_06_v3-39351-47132-for__Pf3D7_11_v3-77570-85365-for	7795	+	[ID=PF3D7_1101400;feature=gene;description=rifin, pseudogene;],[ID=PF3D7_1101500;feature=gene;description=exported+protein+family+4;],[ID=PF3D7_1101600;feature=gene;description=exported+protein+family+3;]
Pf3D7_10_v3	1587418	1595206	Pf3D7_01_v3-71722-79528-rev__Pf3D7_10_v3-1587418-1595206-for	7788	+	[ID=PF3D7_1039800;feature=gene;description=exported+protein+family+3;],[ID=PF3D7_1039600;feature=gene;description=exported protein family 1, pseudogene;],[ID=PF3D7_1039400;feature=gene;description="erythrocyte membrane protein 1 (PfEMP1), pseudogene";],[ID=PF3D7_1039700;feature=gene;description="Pfmc-2TM+Maurer's+cleft+two+transmembrane+protein";]
Pf3D7_06_v3	39351	47132	Pf3D7_06_v3-39351-47132-for__Pf3D7_07_v3-62971-70786-for	7781	+	[ID=PF3D7_0601100;feature=gene;description=exported+protein+family+3;],[ID=PF3D7_0601000;feature=gene;description=exported+protein+family+4;],[ID=PF3D7_0600900;feature=gene;description=rifin, pseudogene;]
Pf3D7_06_v3	39351	47132	Pf3D7_06_v3-39351-47132-for__Pf3D7_11_v3-77570-85365-for	7781	+	[ID=PF3D7_0601100;feature=gene;description=exported+protein+family+3;],[ID=PF3D7_0601000;feature=gene;description=exported+protein+family+4;],[ID=PF3D7_0600900;feature=gene;description=rifin, pseudogene;]
Pf3D7_07_v3	61900	69621	Pf3D7_07_v3-61900-69621-rev__Pf3D7_10_v3-1593730-1601403-for	7721	-	[ID=PF3D7_0701300;feature=gene;description=rifin, pseudogene;],[ID=PF3D7_0701500;feature=gene;description=exported+protein+family+3;],[ID=PF3D7_0701400;feature=gene;description=exported protein family 4, pseudogene;]
Pf3D7_02_v3	937843	945542	Pf3D7_02_v3-2535-10220-for__Pf3D7_02_v3-937843-945542-rev	7699	-
Pf3D7_02_v3	937843	945542	Pf3D7_02_v3-2535-10220-rev__Pf3D7_02_v3-937843-945542-for	7699	+
Pf3D7_02_v3	2535	10220	Pf3D7_02_v3-2535-10220-for__Pf3D7_02_v3-937843-945542-rev	7685	+
Pf3D7_02_v3	2535	10220	Pf3D7_02_v3-2535-10220-rev__Pf3D7_02_v3-937843-945542-for	7685	-
Pf3D7_10_v3	1593730	1601403	Pf3D7_07_v3-61900-69621-rev__Pf3D7_10_v3-1593730-1601403-for	7673	+	[ID=PF3D7_1039900;feature=gene;description=exported+protein+family+4;],[ID=PF3D7_1039800;feature=gene;description=exported+protein+family+3;],[ID=PF3D7_1040000;feature=gene;description=rifin;]
Pf3D7_07_v3	63105	70764	Pf3D7_03_v3-1008454-1016093-rev__Pf3D7_07_v3-63105-70764-for	7659	+	[ID=PF3D7_0701300;feature=gene;description=rifin, pseudogene;],[ID=PF3D7_0701500;feature=gene;description=exported+protein+family+3;],[ID=PF3D7_0701400;feature=gene;description=exported protein family 4, pseudogene;]
Pf3D7_06_v3	1320593	1328237	Pf3D7_06_v3-1320593-1328237-for__Pf3D7_10_v3-1593772-1601403-for	7644	+	[ID=PF3D7_0631500;feature=gene;description=exported+protein+family+3;],[ID=PF3D7_0631600;feature=gene;description=exported+protein+family+4;],[ID=PF3D7_0631700;feature=gene;description=rifin, pseudogene;]
Pf3D7_03_v3	1008454	1016093	Pf3D7_03_v3-1008454-1016093-rev__Pf3D7_07_v3-63105-70764-for	7639	-	[ID=PF3D7_0324300;feature=gene;description=exported+protein+family+4;],[ID=PF3D7_0324400;feature=gene;description=rifin;],[ID=PF3D7_0324200;feature=gene;description=exported+protein+family+3;]
Pf3D7_07_v3	1083233	1090871	Pf3D7_05_v3-1289080-1296711-for__Pf3D7_07_v3-1083233-1090871-for	7638	+	[ID=PF3D7_0725600;feature=gene;description=18S+ribosomal+RNA;],[ID=PF3D7_0725700;feature=gene;description=unspecified+product;],[ID=PF3D7_0725800;feature=gene;description=5.8S+ribosomal+RNA;],[ID=PF3D7_0726000;feature=gene;description=28S+ribosomal+RNA;],[ID=PF3D7_0725900;feature=gene;description=unspecified+product;]
Pf3D7_05_v3	1289080	1296711	Pf3D7_05_v3-1289080-1296711-for__Pf3D7_07_v3-1083233-1090871-for	7631	+	[ID=PF3D7_0531500;feature=gene;description=non-coding+RNA;],[ID=PF3D7_0531700;feature=gene;description=unspecified+product;],[ID=PF3D7_0531800;feature=gene;description=5.8S+ribosomal+RNA;],[ID=PF3D7_0532000;feature=gene;description=28S+ribosomal+RNA;],[ID=PF3D7_0531900;feature=gene;description=unspecified+product;],[ID=PF3D7_0531600;feature=gene;description=18S+ribosomal+RNA;]
Pf3D7_10_v3	1593772	1601403	Pf3D7_06_v3-1320593-1328237-for__Pf3D7_10_v3-1593772-1601403-for	7631	+	[ID=PF3D7_1039900;feature=gene;description=exported+protein+family+4;],[ID=PF3D7_1039800;feature=gene;description=exported+protein+family+3;],[ID=PF3D7_1040000;feature=gene;description=rifin;]
Pf3D7_11_v3	919	8516	Pf3D7_11_v3-919-8516-rev__Pf3D7_12_v3-2263915-2271478-for	7597	-
Pf3D7_12_v3	2263915	2271478	Pf3D7_11_v3-919-8516-rev__Pf3D7_12_v3-2263915-2271478-for	7563	+
Pf3D7_02_v3	2468	9895	Pf3D7_02_v3-2468-9895-for__Pf3D7_11_v3-1974-9374-for	7427	+
Pf3D7_11_v3	1974	9374	Pf3D7_02_v3-2468-9895-for__Pf3D7_11_v3-1974-9374-for	7400	+
Pf3D7_13_v3	2845725	2853075	Pf3D7_12_v3-2175287-2182603-for__Pf3D7_13_v3-2845725-2853075-for	7350	+	[ID=PF3D7_1372400;feature=gene;description=acyl-CoA+synthetase;],[ID=PF3D7_1372300;feature=gene;description="Plasmodium exported protein (PHIST), unknown function";]
Pf3D7_11_v3	2556	9896	Pf3D7_03_v3-1054321-1061655-rev__Pf3D7_11_v3-2556-9896-for	7340	+
Pf3D7_03_v3	1054321	1061655	Pf3D7_03_v3-1054321-1061655-rev__Pf3D7_11_v3-2556-9896-for	7334	-
Pf3D7_02_v3	874129	881449	Pf3D7_02_v3-874129-881449-for__Pf3D7_03_v3-1003100-1010340-for	7320	+	[ID=PF3D7_0222000;feature=gene;description=exported+protein+family+1;],[ID=PF3D7_0221900;feature=gene;description="erythrocyte membrane protein 1 (PfEMP1), pseudogene";],[ID=PF3D7_0222100;feature=gene;description="Pfmc-2TM+Maurer's+cleft+two+transmembrane+protein";]
Pf3D7_12_v3	2175287	2182603	Pf3D7_12_v3-2175287-2182603-for__Pf3D7_13_v3-2845725-2853075-for	7316	+	[ID=PF3D7_1253300;feature=gene;description="Plasmodium exported protein (PHISTa), unknown function, pseudogene";],[ID=PF3D7_1253400;feature=gene;description=acyl-CoA+synthetase;]
Pf3D7_07_v3	62215	69474	Pf3D7_07_v3-62215-69474-for__Pf3D7_11_v3-76815-84031-for	7259	+	[ID=PF3D7_0701300;feature=gene;description=rifin, pseudogene;],[ID=PF3D7_0701500;feature=gene;description=exported+protein+family+3;],[ID=PF3D7_0701400;feature=gene;description=exported protein family 4, pseudogene;]
Pf3D7_03_v3	1003100	1010340	Pf3D7_02_v3-874129-881449-for__Pf3D7_03_v3-1003100-1010340-for	7240	+	[ID=PF3D7_0323900;feature=gene;description="erythrocyte membrane protein 1 (PfEMP1), exon 2, pseudogene";],[ID=PF3D7_0324100;feature=gene;description="Pfmc-2TM+Maurer's+cleft+two+transmembrane+protein";],[ID=PF3D7_0324000;feature=gene;description=exported+protein+family+1;]
Pf3D7_11_v3	76801	84031	Pf3D7_10_v3-1593876-1601095-rev__Pf3D7_11_v3-76801-84031-for	7230	+	[ID=PF3D7_1101400;feature=gene;description=rifin, pseudogene;],[ID=PF3D7_1101500;feature=gene;description=exported+protein+family+4;],[ID=PF3D7_1101600;feature=gene;description=exported+protein+family+3;]
Pf3D7_10_v3	1593876	1601095	Pf3D7_10_v3-1593876-1601095-rev__Pf3D7_11_v3-76801-84031-for	7219	-	[ID=PF3D7_1039900;feature=gene;description=exported+protein+family+4;],[ID=PF3D7_1039800;feature=gene;description=exported+protein+family+3;],[ID=PF3D7_1040000;feature=gene;description=rifin;]
Pf3D7_11_v3	76815	84031	Pf3D7_07_v3-62215-69474-for__Pf3D7_11_v3-76815-84031-for	7216	+	[ID=PF3D7_1101400;feature=gene;description=rifin, pseudogene;],[ID=PF3D7_1101500;feature=gene;description=exported+protein+family+4;],[ID=PF3D7_1101600;feature=gene;description=exported+protein+family+3;]
Pf3D7_12_v3	2263915	2270973	Pf3D7_03_v3-1055695-1062745-for__Pf3D7_12_v3-2263915-2270973-for	7058	+
Pf3D7_03_v3	1055695	1062745	Pf3D7_03_v3-1055695-1062745-for__Pf3D7_12_v3-2263915-2270973-for	7050	+
Pf3D7_11_v3	86300	93336	Pf3D7_10_v3-1584689-1591695-rev__Pf3D7_11_v3-86300-93336-for	7036	+	[ID=PF3D7_1101800;feature=gene;description=exported+protein+family+1;],[ID=PF3D7_1101700;feature=gene;description="Pfmc-2TM+Maurer's+cleft+two+transmembrane+protein";],[ID=PF3D7_1101900;feature=gene;description="erythrocyte membrane protein 1 (PfEMP1), pseudogene";]
Pf3D7_10_v3	1679251	1686282	Pf3D7_04_v3-572-7599-rev__Pf3D7_10_v3-1679251-1686282-for	7031	+
Pf3D7_04_v3	572	7599	Pf3D7_04_v3-572-7599-rev__Pf3D7_10_v3-1679251-1686282-for	7027	-
Pf3D7_10_v3	1584689	1591695	Pf3D7_06_v3-1311456-1318444-for__Pf3D7_10_v3-1584689-1591695-for	7006	+	[ID=PF3D7_1039600;feature=gene;description=exported protein family 1, pseudogene;],[ID=PF3D7_1039400;feature=gene;description="erythrocyte membrane protein 1 (PfEMP1), pseudogene";],[ID=PF3D7_1039700;feature=gene;description="Pfmc-2TM+Maurer's+cleft+two+transmembrane+protein";]
Pf3D7_10_v3	1584689	1591695	Pf3D7_10_v3-1584689-1591695-rev__Pf3D7_11_v3-86300-93336-for	7006	-	[ID=PF3D7_1039600;feature=gene;description=exported protein family 1, pseudogene;],[ID=PF3D7_1039400;feature=gene;description="erythrocyte membrane protein 1 (PfEMP1), pseudogene";],[ID=PF3D7_1039700;feature=gene;description="Pfmc-2TM+Maurer's+cleft+two+transmembrane+protein";]
Pf3D7_06_v3	1311456	1318444	Pf3D7_06_v3-1311456-1318444-for__Pf3D7_10_v3-1584689-1591695-for	6988	+	[ID=PF3D7_0631300;feature=gene;description=exported+protein+family+1;],[ID=PF3D7_0631400;feature=gene;description="Pfmc-2TM+Maurer's+cleft+two+transmembrane+protein";],[ID=PF3D7_0631200;feature=gene;description="erythrocyte membrane protein 1 (PfEMP1), pseudogene";]
Pf3D7_02_v3	876347	883277	Pf3D7_02_v3-876347-883277-rev__Pf3D7_07_v3-67039-73959-for	6930	-	[ID=PF3D7_0222200;feature=gene;description=exported+protein+family+3;],[ID=PF3D7_0222000;feature=gene;description=exported+protein+family+1;],[ID=PF3D7_0222100;feature=gene;description="Pfmc-2TM+Maurer's+cleft+two+transmembrane+protein";]
Pf3D7_13_v3	66750	73678	Pf3D7_13_v3-66750-73678-for__Pf3D7_14_v3-28365-35290-for	6928	+	[ID=PF3D7_1301100;feature=gene;description="Plasmodium exported protein (PHISTa), unknown function, pseudogene";],[ID=PF3D7_1301000;feature=gene;description=rifin, pseudogene;],[ID=PF3D7_1301200;feature=gene;description=GBPH2+protein;]
Pf3D7_14_v3	28365	35290	Pf3D7_13_v3-66750-73678-for__Pf3D7_14_v3-28365-35290-for	6925	+	[ID=PF3D7_1400900;feature=gene;description="Plasmodium exported protein (PHISTa), unknown function, pseudogene";],[ID=PF3D7_1400800;feature=gene;description=rifin;],[ID=PF3D7_1401000;feature=gene;description=GBPH+protein;]
Pf3D7_07_v3	67039	73959	Pf3D7_02_v3-876347-883277-rev__Pf3D7_07_v3-67039-73959-for	6920	+	[ID=PF3D7_0701600;feature=gene;description="Pfmc-2TM+Maurer's+cleft+two+transmembrane+protein";],[ID=PF3D7_0701500;feature=gene;description=exported+protein+family+3;],[ID=PF3D7_0701700;feature=gene;description=exported+protein+family+1;]
Pf3D7_12_v3	2264170	2270973	Pf3D7_12_v3-2264170-2270973-for__Pf3D7_12_v3-819-7580-rev	6803	+
Pf3D7_12_v3	2264170	2270973	Pf3D7_12_v3-2264170-2270973-rev__Pf3D7_12_v3-819-7580-for	6803	-
Pf3D7_12_v3	819	7580	Pf3D7_12_v3-2264170-2270973-for__Pf3D7_12_v3-819-7580-rev	6761	-
Pf3D7_12_v3	819	7580	Pf3D7_12_v3-2264170-2270973-rev__Pf3D7_12_v3-819-7580-for	6761	+
Pf3D7_03_v3	1002840	1009600	Pf3D7_03_v3-1002840-1009600-for__Pf3D7_10_v3-1587035-1593773-for	6760	+	[ID=PF3D7_0323900;feature=gene;description="erythrocyte membrane protein 1 (PfEMP1), exon 2, pseudogene";],[ID=PF3D7_0324100;feature=gene;description="Pfmc-2TM+Maurer's+cleft+two+transmembrane+protein";],[ID=PF3D7_0324000;feature=gene;description=exported+protein+family+1;]
Pf3D7_07_v3	1437957	1444704	Pf3D7_04_v3-1754-8469-rev__Pf3D7_07_v3-1437957-1444704-for	6747	+
Pf3D7_10_v3	1587035	1593773	Pf3D7_03_v3-1002840-1009600-for__Pf3D7_10_v3-1587035-1593773-for	6738	+	[ID=PF3D7_1039600;feature=gene;description=exported protein family 1, pseudogene;],[ID=PF3D7_1039400;feature=gene;description="erythrocyte membrane protein 1 (PfEMP1), pseudogene";],[ID=PF3D7_1039700;feature=gene;description="Pfmc-2TM+Maurer's+cleft+two+transmembrane+protein";]
Pf3D7_04_v3	1754	8469	Pf3D7_04_v3-1754-8469-rev__Pf3D7_07_v3-1437957-1444704-for	6715	-
Pf3D7_06_v3	39351	46014	Pf3D7_06_v3-1320536-1327166-rev__Pf3D7_06_v3-39351-46014-for	6663	+	[ID=PF3D7_0601100;feature=gene;description=exported+protein+family+3;],[ID=PF3D7_0601000;feature=gene;description=exported+protein+family+4;],[ID=PF3D7_0600900;feature=gene;description=rifin, pseudogene;]
Pf3D7_06_v3	1320536	1327166	Pf3D7_06_v3-1320536-1327166-rev__Pf3D7_06_v3-39351-46014-for	6630	-	[ID=PF3D7_0631500;feature=gene;description=exported+protein+family+3;],[ID=PF3D7_0631600;feature=gene;description=exported+protein+family+4;],[ID=PF3D7_0631700;feature=gene;description=rifin, pseudogene;]
Pf3D7_04_v3	2373	8991	Pf3D7_04_v3-2373-8991-for__Pf3D7_09_v3-1620-8236-for	6618	+
Pf3D7_09_v3	1620	8236	Pf3D7_04_v3-2373-8991-for__Pf3D7_09_v3-1620-8236-for	6616	+
Pf3D7_06_v3	43755	50359	Pf3D7_06_v3-43755-50359-for__Pf3D7_07_v3-67372-73959-for	6604	+	[ID=PF3D7_0601300;feature=gene;description=exported+protein+family+1;],[ID=PF3D7_0601100;feature=gene;description=exported+protein+family+3;],[ID=PF3D7_0601200;feature=gene;description="Pfmc-2TM+Maurer's+cleft+two+transmembrane+protein";]
Pf3D7_02_v3	883239	889839	Pf3D7_02_v3-883239-889839-for__Pf3D7_10_v3-1596549-1603114-for	6600	+	[ID=PF3D7_0222500;feature=gene;description=rifin;],[ID=PF3D7_0222300;feature=gene;description=exported protein family 4, pseudogene;],[ID=PF3D7_0222400;feature=gene;description=rifin, pseudogene;]
Pf3D7_02_v3	874129	880719	Pf3D7_02_v3-874129-880719-for__Pf3D7_10_v3-1587290-1593773-for	6590	+	[ID=PF3D7_0222000;feature=gene;description=exported+protein+family+1;],[ID=PF3D7_0221900;feature=gene;description="erythrocyte membrane protein 1 (PfEMP1), pseudogene";],[ID=PF3D7_0222100;feature=gene;description="Pfmc-2TM+Maurer's+cleft+two+transmembrane+protein";]
Pf3D7_07_v3	67372	73959	Pf3D7_06_v3-43755-50359-for__Pf3D7_07_v3-67372-73959-for	6587	+	[ID=PF3D7_0701600;feature=gene;description="Pfmc-2TM+Maurer's+cleft+two+transmembrane+protein";],[ID=PF3D7_0701500;feature=gene;description=exported+protein+family+3;],[ID=PF3D7_0701700;feature=gene;description=exported+protein+family+1;]
Pf3D7_10_v3	1596549	1603114	Pf3D7_02_v3-883239-889839-for__Pf3D7_10_v3-1596549-1603114-for	6565	+	[ID=PF3D7_1039900;feature=gene;description=exported+protein+family+4;],[ID=PF3D7_1040000;feature=gene;description=rifin;],[ID=PF3D7_1040100;feature=gene;description=rifin;]
Pf3D7_03_v3	1009598	1016093	Pf3D7_01_v3-66695-73175-rev__Pf3D7_03_v3-1009598-1016093-for	6495	+	[ID=PF3D7_0324300;feature=gene;description=exported+protein+family+4;],[ID=PF3D7_0324400;feature=gene;description=rifin;],[ID=PF3D7_0324200;feature=gene;description=exported+protein+family+3;]
Pf3D7_02_v3	939368	945857	Pf3D7_02_v3-939368-945857-rev__Pf3D7_12_v3-1063-7533-for	6489	-
Pf3D7_10_v3	1587290	1593773	Pf3D7_02_v3-874129-880719-for__Pf3D7_10_v3-1587290-1593773-for	6483	+	[ID=PF3D7_1039600;feature=gene;description=exported protein family 1, pseudogene;],[ID=PF3D7_1039400;feature=gene;description="erythrocyte membrane protein 1 (PfEMP1), pseudogene";],[ID=PF3D7_1039700;feature=gene;description="Pfmc-2TM+Maurer's+cleft+two+transmembrane+protein";]
Pf3D7_01_v3	66549	73029	Pf3D7_01_v3-66549-73029-for__Pf3D7_11_v3-77558-84031-for	6480	+	[ID=PF3D7_0101100;feature=gene;description=exported+protein+family+4;],[ID=PF3D7_0101200;feature=gene;description=exported+protein+family+3;],[ID=PF3D7_0101000;feature=gene;description=rifin;]
Pf3D7_01_v3	66695	73175	Pf3D7_01_v3-66695-73175-rev__Pf3D7_03_v3-1009598-1016093-for	6480	-	[ID=PF3D7_0101100;feature=gene;description=exported+protein+family+4;],[ID=PF3D7_0101200;feature=gene;description=exported+protein+family+3;],[ID=PF3D7_0101000;feature=gene;description=rifin;]
Pf3D7_11_v3	77558	84031	Pf3D7_01_v3-66549-73029-for__Pf3D7_11_v3-77558-84031-for	6473	+	[ID=PF3D7_1101400;feature=gene;description=rifin, pseudogene;],[ID=PF3D7_1101500;feature=gene;description=exported+protein+family+4;],[ID=PF3D7_1101600;feature=gene;description=exported+protein+family+3;]
Pf3D7_12_v3	1063	7533	Pf3D7_02_v3-939368-945857-rev__Pf3D7_12_v3-1063-7533-for	6470	+
Pf3D7_01_v3	73132	79527	Pf3D7_01_v3-73132-79527-rev__Pf3D7_03_v3-1003229-1009600-for	6395	-	[ID=PF3D7_0101500;feature=gene;description="erythrocyte membrane protein 1 (PfEMP1), exon 2, pseudogene";],[ID=PF3D7_0101300;feature=gene;description="Pfmc-2TM+Maurer's+cleft+two+transmembrane+protein";],[ID=PF3D7_0101400;feature=gene;description=exported protein family 1, pseudogene;]
Pf3D7_08_v3	418	6795	Pf3D7_08_v3-418-6795-rev__Pf3D7_12_v3-2265158-2271478-for	6377	-
Pf3D7_03_v3	1003229	1009600	Pf3D7_01_v3-73132-79527-rev__Pf3D7_03_v3-1003229-1009600-for	6371	+	[ID=PF3D7_0323900;feature=gene;description="erythrocyte membrane protein 1 (PfEMP1), exon 2, pseudogene";],[ID=PF3D7_0324100;feature=gene;description="Pfmc-2TM+Maurer's+cleft+two+transmembrane+protein";],[ID=PF3D7_0324000;feature=gene;description=exported+protein+family+1;]
Pf3D7_05_v3	1549	7902	Pf3D7_02_v3-939200-945542-rev__Pf3D7_05_v3-1549-7902-for	6353	+
Pf3D7_13_v3	1984	8337	Pf3D7_02_v3-939200-945542-rev__Pf3D7_13_v3-1984-8337-for	6353	+
Pf3D7_02_v3	939200	945542	Pf3D7_02_v3-939200-945542-rev__Pf3D7_05_v3-1549-7902-for	6342	-
Pf3D7_02_v3	939200	945542	Pf3D7_02_v3-939200-945542-rev__Pf3D7_13_v3-1984-8337-for	6342	-
Pf3D7_12_v3	2265158	2271478	Pf3D7_08_v3-418-6795-rev__Pf3D7_12_v3-2265158-2271478-for	6320	+
Pf3D7_09_v3	1533424	1539647	Pf3D7_09_v3-1533424-1539647-for__Pf3D7_12_v3-2264170-2270387-for	6223	+
Pf3D7_12_v3	2264170	2270387	Pf3D7_09_v3-1533424-1539647-for__Pf3D7_12_v3-2264170-2270387-for	6217	+
Pf3D7_10_v3	1680080	1686282	Pf3D7_06_v3-1410211-1416407-for__Pf3D7_10_v3-1680080-1686282-for	6202	+
Pf3D7_07_v3	1437457	1443656	Pf3D7_07_v3-1437457-1443656-rev__Pf3D7_11_v3-3627-9809-for	6199	-
Pf3D7_06_v3	1410211	1416407	Pf3D7_06_v3-1410211-1416407-for__Pf3D7_10_v3-1680080-1686282-for	6196	+
Pf3D7_11_v3	3627	9809	Pf3D7_07_v3-1437457-1443656-rev__Pf3D7_11_v3-3627-9809-for	6182	+
Pf3D7_09_v3	1533471	1539647	Pf3D7_02_v3-939368-945542-for__Pf3D7_09_v3-1533471-1539647-for	6176	+
Pf3D7_02_v3	939368	945542	Pf3D7_02_v3-939368-945542-for__Pf3D7_09_v3-1533471-1539647-for	6174	+
Pf3D7_07_v3	1437457	1443626	Pf3D7_03_v3-1054408-1060553-for__Pf3D7_07_v3-1437457-1443626-for	6169	+
Pf3D7_03_v3	1054408	1060553	Pf3D7_03_v3-1054408-1060553-for__Pf3D7_07_v3-1437457-1443626-for	6145	+
Pf3D7_09_v3	1486761	1492795	Pf3D7_06_v3-15989-21999-rev__Pf3D7_09_v3-1486761-1492795-for	6034	+	[ID=PF3D7_0937700;feature=gene;description=rifin;],[ID=PF3D7_0937600;feature=gene;description=erythrocyte membrane protein 1, PfEMP1;]
Pf3D7_10_v3	1677901	1683913	Pf3D7_10_v3-1677901-1683913-rev__Pf3D7_11_v3-3760-9763-for	6012	-
Pf3D7_06_v3	15989	21999	Pf3D7_06_v3-15989-21999-rev__Pf3D7_09_v3-1486761-1492795-for	6010	-	[ID=PF3D7_0600300;feature=gene;description=rifin;],[ID=PF3D7_0600400;feature=gene;description=erythrocyte membrane protein 1, PfEMP1;]
Pf3D7_11_v3	3760	9763	Pf3D7_10_v3-1677901-1683913-rev__Pf3D7_11_v3-3760-9763-for	6003	+
Pf3D7_08_v3	2	5985	Pf3D7_08_v3-2-5985-rev__Pf3D7_09_v3-1535222-1541133-for	5983	-
Pf3D7_01_v3	75919	81877	Pf3D7_01_v3-75919-81877-for__Pf3D7_11_v3-60866-66798-for	5958	+	[ID=PF3D7_0101500;feature=gene;description="erythrocyte membrane protein 1 (PfEMP1), exon 2, pseudogene";],[ID=PF3D7_0101400;feature=gene;description=exported protein family 1, pseudogene;],[ID=PF3D7_0101600;feature=gene;description=rifin;]
Pf3D7_11_v3	60866	66798	Pf3D7_01_v3-75919-81877-for__Pf3D7_11_v3-60866-66798-for	5932	+	[ID=PF3D7_1101000;feature=gene;description="erythrocyte membrane protein 1 (PfEMP1), pseudogene";],[ID=PF3D7_1101100;feature=gene;description=rifin;],[ID=PF3D7_1100900;feature=gene;description=exported protein family 1, pseudogene;]
Pf3D7_09_v3	1535222	1541133	Pf3D7_08_v3-2-5985-rev__Pf3D7_09_v3-1535222-1541133-for	5911	+
Pf3D7_01_v3	66563	72470	Pf3D7_01_v3-66563-72470-for__Pf3D7_06_v3-39353-45260-for	5907	+	[ID=PF3D7_0101100;feature=gene;description=exported+protein+family+4;],[ID=PF3D7_0101200;feature=gene;description=exported+protein+family+3;],[ID=PF3D7_0101000;feature=gene;description=rifin;]
Pf3D7_06_v3	39353	45260	Pf3D7_01_v3-66563-72470-for__Pf3D7_06_v3-39353-45260-for	5907	+	[ID=PF3D7_0601100;feature=gene;description=exported+protein+family+3;],[ID=PF3D7_0601000;feature=gene;description=exported+protein+family+4;],[ID=PF3D7_0600900;feature=gene;description=rifin, pseudogene;]
Pf3D7_14_v3	3260337	3266231	Pf3D7_12_v3-2195744-2201596-for__Pf3D7_14_v3-3260337-3266231-for	5894	+	[ID=PF3D7_1479300;feature=gene;description="Plasmodium exported protein (PHISTa), unknown function, pseudogene";],[ID=PF3D7_1479200;feature=gene;description="Plasmodium exported protein (PHISTa), unknown function";],[ID=PF3D7_1479400;feature=gene;description=rifin;]
Pf3D7_07_v3	1438837	1444713	Pf3D7_07_v3-1438837-1444713-for__Pf3D7_10_v3-1679260-1685102-for	5876	+
Pf3D7_12_v3	2195744	2201596	Pf3D7_12_v3-2195744-2201596-for__Pf3D7_14_v3-3260337-3266231-for	5852	+	[ID=PF3D7_1253800;feature=gene;description="Plasmodium exported protein (PHISTa), unknown function";],[ID=PF3D7_1253900;feature=gene;description="Plasmodium exported protein (PHISTa), unknown function, pseudogene";],[ID=PF3D7_1254000;feature=gene;description=rifin;]
Pf3D7_10_v3	1679260	1685102	Pf3D7_07_v3-1438837-1444713-for__Pf3D7_10_v3-1679260-1685102-for	5842	+
Pf3D7_04_v3	3112	8953	Pf3D7_01_v3-3541-9372-for__Pf3D7_04_v3-3112-8953-for	5841	+
Pf3D7_01_v3	3541	9372	Pf3D7_01_v3-3541-9372-for__Pf3D7_04_v3-3112-8953-for	5831	+
Pf3D7_10_v3	840	6630	Pf3D7_10_v3-840-6630-for__Pf3D7_11_v3-1385-7155-for	5790	+
Pf3D7_11_v3	1385	7155	Pf3D7_10_v3-840-6630-for__Pf3D7_11_v3-1385-7155-for	5770	+
Pf3D7_06_v3	47072	52829	Pf3D7_03_v3-1002840-1008590-rev__Pf3D7_06_v3-47072-52829-for	5757	+	[ID=PF3D7_0601300;feature=gene;description=exported+protein+family+1;],[ID=PF3D7_0601400;feature=gene;description="erythrocyte membrane protein 1 (PfEMP1), pseudogene";],[ID=PF3D7_0601200;feature=gene;description="Pfmc-2TM+Maurer's+cleft+two+transmembrane+protein";]
Pf3D7_03_v3	1002840	1008590	Pf3D7_03_v3-1002840-1008590-rev__Pf3D7_06_v3-47072-52829-for	5750	-	[ID=PF3D7_0323900;feature=gene;description="erythrocyte membrane protein 1 (PfEMP1), exon 2, pseudogene";],[ID=PF3D7_0324100;feature=gene;description="Pfmc-2TM+Maurer's+cleft+two+transmembrane+protein";],[ID=PF3D7_0324000;feature=gene;description=exported+protein+family+1;]
Pf3D7_01_v3	75919	81632	Pf3D7_01_v3-75919-81632-for__Pf3D7_07_v3-49675-55388-for	5713	+	[ID=PF3D7_0101500;feature=gene;description="erythrocyte membrane protein 1 (PfEMP1), exon 2, pseudogene";],[ID=PF3D7_0101400;feature=gene;description=exported protein family 1, pseudogene;]
Pf3D7_07_v3	49675	55388	Pf3D7_01_v3-75919-81632-for__Pf3D7_07_v3-49675-55388-for	5713	+	[ID=PF3D7_0700900;feature=gene;description=exported protein family 1, pseudogene;],[ID=PF3D7_0701000;feature=gene;description="erythrocyte membrane protein 1 (PfEMP1), pseudogene";]
Pf3D7_09_v3	1535251	1540950	Pf3D7_01_v3-397-6037-rev__Pf3D7_09_v3-1535251-1540950-for	5699	+
Pf3D7_07_v3	1437958	1443629	Pf3D7_02_v3-4149-9778-rev__Pf3D7_07_v3-1437958-1443629-for	5671	+
Pf3D7_01_v3	397	6037	Pf3D7_01_v3-397-6037-rev__Pf3D7_09_v3-1535251-1540950-for	5640	-
Pf3D7_02_v3	4149	9778	Pf3D7_02_v3-4149-9778-rev__Pf3D7_07_v3-1437958-1443629-for	5629	-
Pf3D7_04_v3	3	5612	Pf3D7_04_v3-3-5612-rev__Pf3D7_06_v3-1411368-1416968-for	5609	-
Pf3D7_06_v3	1411368	1416968	Pf3D7_04_v3-3-5612-rev__Pf3D7_06_v3-1411368-1416968-for	5600	+
Pf3D7_04_v3	1191927	1197386	Pf3D7_04_v3-1191927-1197386-rev__Pf3D7_07_v3-3622-9073-for	5459	-
Pf3D7_03_v3	1057771	1063226	Pf3D7_03_v3-1057771-1063226-rev__Pf3D7_08_v3-564-5962-for	5455	-
Pf3D7_07_v3	3622	9073	Pf3D7_04_v3-1191927-1197386-rev__Pf3D7_07_v3-3622-9073-for	5451	+
Pf3D7_10_v3	948	6390	Pf3D7_10_v3-948-6390-for__Pf3D7_12_v3-846-6235-for	5442	+
Pf3D7_08_v3	564	5962	Pf3D7_03_v3-1057771-1063226-rev__Pf3D7_08_v3-564-5962-for	5398	+
Pf3D7_12_v3	846	6235	Pf3D7_10_v3-948-6390-for__Pf3D7_12_v3-846-6235-for	5389	+
Pf3D7_03_v3	1054516	1059856	Pf3D7_03_v3-1054516-1059856-for__Pf3D7_13_v3-2912241-2917572-for	5340	+
Pf3D7_13_v3	2912241	2917572	Pf3D7_03_v3-1054516-1059856-for__Pf3D7_13_v3-2912241-2917572-for	5331	+
Pf3D7_13_v3	2912241	2917572	Pf3D7_09_v3-1532010-1537333-for__Pf3D7_13_v3-2912241-2917572-for	5331	+
Pf3D7_09_v3	1532010	1537333	Pf3D7_09_v3-1532010-1537333-for__Pf3D7_13_v3-2912241-2917572-for	5323	+
Pf3D7_07_v3	1437565	1442879	Pf3D7_07_v3-1437565-1442879-for__Pf3D7_13_v3-2912241-2917544-for	5314	+
Pf3D7_13_v3	2912241	2917544	Pf3D7_07_v3-1437565-1442879-for__Pf3D7_13_v3-2912241-2917544-for	5303	+
Pf3D7_11_v3	4428	9725	Pf3D7_11_v3-4428-9725-rev__Pf3D7_13_v3-2912208-2917500-for	5297	-
Pf3D7_13_v3	2912208	2917500	Pf3D7_11_v3-4428-9725-rev__Pf3D7_13_v3-2912208-2917500-for	5292	+
Pf3D7_06_v3	47166	52445	Pf3D7_01_v3-74264-79528-for__Pf3D7_06_v3-47166-52445-for	5279	+	[ID=PF3D7_0601300;feature=gene;description=exported+protein+family+1;],[ID=PF3D7_0601400;feature=gene;description="erythrocyte membrane protein 1 (PfEMP1), pseudogene";],[ID=PF3D7_0601200;feature=gene;description="Pfmc-2TM+Maurer's+cleft+two+transmembrane+protein";]
Pf3D7_01_v3	74264	79528	Pf3D7_01_v3-74264-79528-for__Pf3D7_06_v3-47166-52445-for	5264	+	[ID=PF3D7_0101500;feature=gene;description="erythrocyte membrane protein 1 (PfEMP1), exon 2, pseudogene";],[ID=PF3D7_0101300;feature=gene;description="Pfmc-2TM+Maurer's+cleft+two+transmembrane+protein";],[ID=PF3D7_0101400;feature=gene;description=exported protein family 1, pseudogene;]
Pf3D7_04_v3	1194545	1199798	Pf3D7_04_v3-1194545-1199798-for__Pf3D7_10_v3-1681202-1686398-for	5253	+
Pf3D7_13_v3	2912241	2917486	Pf3D7_02_v3-4936-10160-rev__Pf3D7_13_v3-2912241-2917486-for	5245	+
Pf3D7_02_v3	4936	10160	Pf3D7_02_v3-4936-10160-rev__Pf3D7_13_v3-2912241-2917486-for	5224	-
Pf3D7_07_v3	62959	68172	Pf3D7_01_v3-66549-71730-for__Pf3D7_07_v3-62959-68172-for	5213	+	[ID=PF3D7_0701300;feature=gene;description=rifin, pseudogene;],[ID=PF3D7_0701500;feature=gene;description=exported+protein+family+3;],[ID=PF3D7_0701400;feature=gene;description=exported protein family 4, pseudogene;]
Pf3D7_09_v3	34936	40141	Pf3D7_06_v3-1342007-1347155-rev__Pf3D7_09_v3-34936-40141-for	5205	+	[ID=PF3D7_0900400;feature=gene;description=rifin;]
Pf3D7_10_v3	1681202	1686398	Pf3D7_04_v3-1194545-1199798-for__Pf3D7_10_v3-1681202-1686398-for	5196	+
Pf3D7_06_v3	1321987	1327178	Pf3D7_01_v3-66549-71730-rev__Pf3D7_06_v3-1321987-1327178-for	5191	+	[ID=PF3D7_0631500;feature=gene;description=exported+protein+family+3;],[ID=PF3D7_0631600;feature=gene;description=exported+protein+family+4;],[ID=PF3D7_0631700;feature=gene;description=rifin, pseudogene;]
Pf3D7_01_v3	66547	71730	Pf3D7_01_v3-66547-71730-rev__Pf3D7_10_v3-1595170-1600343-for	5183	-	[ID=PF3D7_0101100;feature=gene;description=exported+protein+family+4;],[ID=PF3D7_0101200;feature=gene;description=exported+protein+family+3;],[ID=PF3D7_0101000;feature=gene;description=rifin;]
Pf3D7_01_v3	66549	71730	Pf3D7_01_v3-66549-71730-for__Pf3D7_07_v3-62959-68172-for	5181	+	[ID=PF3D7_0101100;feature=gene;description=exported+protein+family+4;],[ID=PF3D7_0101200;feature=gene;description=exported+protein+family+3;],[ID=PF3D7_0101000;feature=gene;description=rifin;]
Pf3D7_01_v3	66549	71730	Pf3D7_01_v3-66549-71730-rev__Pf3D7_06_v3-1321987-1327178-for	5181	-	[ID=PF3D7_0101100;feature=gene;description=exported+protein+family+4;],[ID=PF3D7_0101200;feature=gene;description=exported+protein+family+3;],[ID=PF3D7_0101000;feature=gene;description=rifin;]
Pf3D7_10_v3	1595170	1600343	Pf3D7_01_v3-66547-71730-rev__Pf3D7_10_v3-1595170-1600343-for	5173	+	[ID=PF3D7_1039900;feature=gene;description=exported+protein+family+4;],[ID=PF3D7_1039800;feature=gene;description=exported+protein+family+3;],[ID=PF3D7_1040000;feature=gene;description=rifin;]
Pf3D7_03_v3	1057744	1062909	Pf3D7_03_v3-1057744-1062909-rev__Pf3D7_12_v3-655-5786-for	5165	-
Pf3D7_06_v3	1342007	1347155	Pf3D7_06_v3-1342007-1347155-rev__Pf3D7_09_v3-34936-40141-for	5148	-	[ID=PF3D7_0632200;feature=gene;description=rifin;]
Pf3D7_08_v3	1422444	1427581	Pf3D7_01_v3-54340-59417-rev__Pf3D7_08_v3-1422444-1427581-for	5137	+	[ID=PF3D7_0833200;feature=gene;description=rifin;]
Pf3D7_08_v3	1422444	1427580	Pf3D7_06_v3-1342942-1348007-for__Pf3D7_08_v3-1422444-1427580-for	5136	+	[ID=PF3D7_0833200;feature=gene;description=rifin;]
Pf3D7_12_v3	655	5786	Pf3D7_03_v3-1057744-1062909-rev__Pf3D7_12_v3-655-5786-for	5131	+
Pf3D7_03_v3	47274	52399	Pf3D7_01_v3-599352-604466-rev__Pf3D7_03_v3-47274-52399-for	5125	+	[ID=PF3D7_0300300;feature=gene;description="erythrocyte membrane protein 1 (PfEMP1), exon 2, pseudogene";],[ID=PF3D7_0300200;feature=gene;description=rifin;],[ID=PF3D7_0300400;feature=gene;description=stevor;]
Pf3D7_01_v3	599352	604466	Pf3D7_01_v3-599352-604466-rev__Pf3D7_03_v3-47274-52399-for	5114	-	[ID=PF3D7_0115500;feature=gene;description="erythrocyte membrane protein 1 (PfEMP1), pseudogene";],[ID=PF3D7_0115600;feature=gene;description=rifin;],[ID=PF3D7_0115400;feature=gene;description=stevor;]
Pf3D7_10_v3	840	5949	Pf3D7_08_v3-908-5998-for__Pf3D7_10_v3-840-5949-for	5109	+
Pf3D7_10_v3	840	5940	Pf3D7_09_v3-1535218-1540317-rev__Pf3D7_10_v3-840-5940-for	5100	+
Pf3D7_10_v3	840	5940	Pf3D7_10_v3-840-5940-rev__Pf3D7_12_v3-2265964-2271054-for	5100	-
Pf3D7_09_v3	1535218	1540317	Pf3D7_09_v3-1535218-1540317-rev__Pf3D7_10_v3-840-5940-for	5099	-
Pf3D7_08_v3	908	5998	Pf3D7_08_v3-908-5998-for__Pf3D7_10_v3-840-5949-for	5090	+
Pf3D7_12_v3	2265964	2271054	Pf3D7_10_v3-840-5940-rev__Pf3D7_12_v3-2265964-2271054-for	5090	+
Pf3D7_01_v3	54340	59417	Pf3D7_01_v3-54340-59417-rev__Pf3D7_08_v3-1422444-1427581-for	5077	-	[ID=PF3D7_0100600;feature=gene;description=rifin;],[ID=PF3D7_0100700;feature=gene;description=Plasmodium exported protein, unknown function, fragment;]
Pf3D7_04_v3	574	5651	Pf3D7_04_v3-1194540-1199596-for__Pf3D7_04_v3-574-5651-rev	5077	-
Pf3D7_04_v3	574	5651	Pf3D7_04_v3-1194540-1199596-rev__Pf3D7_04_v3-574-5651-for	5077	+
Pf3D7_06_v3	1411333	1416405	Pf3D7_04_v3-1194545-1199596-for__Pf3D7_06_v3-1411333-1416405-for	5072	+
Pf3D7_06_v3	1342942	1348007	Pf3D7_06_v3-1342942-1348007-for__Pf3D7_08_v3-1422444-1427580-for	5065	+	[ID=PF3D7_0632300;feature=gene;description=rifin;]
Pf3D7_07_v3	1439029	1444087	Pf3D7_07_v3-1439029-1444087-rev__Pf3D7_09_v3-1617-6634-for	5058	-
Pf3D7_04_v3	1194540	1199596	Pf3D7_04_v3-1194540-1199596-for__Pf3D7_04_v3-574-5651-rev	5056	+
Pf3D7_04_v3	1194540	1199596	Pf3D7_04_v3-1194540-1199596-rev__Pf3D7_04_v3-574-5651-for	5056	-
Pf3D7_07_v3	1439649	1444704	Pf3D7_06_v3-1410211-1415225-for__Pf3D7_07_v3-1439649-1444704-for	5055	+
Pf3D7_04_v3	1194545	1199596	Pf3D7_04_v3-1194545-1199596-for__Pf3D7_06_v3-1411333-1416405-for	5051	+
Pf3D7_10_v3	921	5940	Pf3D7_03_v3-1057744-1062745-rev__Pf3D7_10_v3-921-5940-for	5019	+
Pf3D7_03_v3	1011033	1016051	Pf3D7_03_v3-1011033-1016051-for__Pf3D7_10_v3-1595170-1600156-for	5018	+	[ID=PF3D7_0324300;feature=gene;description=exported+protein+family+4;],[ID=PF3D7_0324400;feature=gene;description=rifin;],[ID=PF3D7_0324200;feature=gene;description=exported+protein+family+3;]
Pf3D7_09_v3	1617	6634	Pf3D7_07_v3-1439029-1444087-rev__Pf3D7_09_v3-1617-6634-for	5017	+
Pf3D7_01_v3	54847	59863	Pf3D7_01_v3-54847-59863-for__Pf3D7_02_v3-58257-63248-for	5016	+	[ID=PF3D7_0100800;feature=gene;description=rifin;],[ID=PF3D7_0100600;feature=gene;description=rifin;],[ID=PF3D7_0100700;feature=gene;description=Plasmodium exported protein, unknown function, fragment;]
Pf3D7_06_v3	1410211	1415225	Pf3D7_06_v3-1410211-1415225-for__Pf3D7_07_v3-1439649-1444704-for	5014	+
Pf3D7_05_v3	1482	6488	Pf3D7_02_v3-2468-7469-for__Pf3D7_05_v3-1482-6488-for	5006	+
Pf3D7_13_v3	1917	6923	Pf3D7_02_v3-2468-7469-for__Pf3D7_13_v3-1917-6923-for	5006	+
Pf3D7_02_v3	2468	7469	Pf3D7_02_v3-2468-7469-for__Pf3D7_05_v3-1482-6488-for	5001	+
Pf3D7_02_v3	2468	7469	Pf3D7_02_v3-2468-7469-for__Pf3D7_13_v3-1917-6923-for	5001	+
Pf3D7_03_v3	1057744	1062745	Pf3D7_03_v3-1057744-1062745-rev__Pf3D7_10_v3-921-5940-for	5001	-
Pf3D7_02_v3	58257	63248	Pf3D7_01_v3-54847-59863-for__Pf3D7_02_v3-58257-63248-for	4991	+	[ID=PF3D7_0201100;feature=gene;description=Plasmodium exported protein, unknown function, fragment;],[ID=PF3D7_0201200;feature=gene;description=rifin;],[ID=PF3D7_0201000;feature=gene;description=rifin;]
Pf3D7_10_v3	1595170	1600156	Pf3D7_03_v3-1011033-1016051-for__Pf3D7_10_v3-1595170-1600156-for	4986	+	[ID=PF3D7_1039900;feature=gene;description=exported+protein+family+4;],[ID=PF3D7_1039800;feature=gene;description=exported+protein+family+3;],[ID=PF3D7_1040000;feature=gene;description=rifin;]
Pf3D7_07_v3	1409862	1414840	Pf3D7_02_v3-908748-913650-for__Pf3D7_07_v3-1409862-1414840-for	4978	+	[ID=PF3D7_0732700;feature=gene;description=rifin;],[ID=PF3D7_0732800;feature=gene;description="erythrocyte membrane protein 1 (PfEMP1), exon 2";],[ID=PF3D7_0732900;feature=gene;description=rifin;]
Pf3D7_01_v3	53586	58526	Pf3D7_01_v3-53586-58526-rev__Pf3D7_06_v3-1343829-1348761-for	4940	-	[ID=PF3D7_0100600;feature=gene;description=rifin;],[ID=PF3D7_0100700;feature=gene;description=Plasmodium exported protein, unknown function, fragment;]
Pf3D7_06_v3	1343829	1348761	Pf3D7_01_v3-53586-58526-rev__Pf3D7_06_v3-1343829-1348761-for	4932	+	[ID=PF3D7_0632300;feature=gene;description=rifin;]
Pf3D7_12_v3	2229485	2234416	Pf3D7_09_v3-34936-39808-rev__Pf3D7_12_v3-2229485-2234416-for	4931	+	[ID=PF3D7_1254800;feature=gene;description=rifin;],[ID=PF3D7_1254900;feature=gene;description=Plasmodium exported protein, unknown function, fragment;]
Pf3D7_01_v3	82466	87395	Pf3D7_01_v3-82466-87395-rev__Pf3D7_07_v3-1386436-1391350-for	4929	-	[ID=PF3D7_0101800;feature=gene;description=stevor;],[ID=PF3D7_0101700;feature=gene;description="erythrocyte membrane protein 1 (PfEMP1), exon 2, pseudogene";],[ID=PF3D7_0101600;feature=gene;description=rifin;]
Pf3D7_07_v3	1386436	1391350	Pf3D7_01_v3-82466-87395-rev__Pf3D7_07_v3-1386436-1391350-for	4914	+	[ID=PF3D7_0732200;feature=gene;description=rifin;],[ID=PF3D7_0732000;feature=gene;description=stevor;],[ID=PF3D7_0732100;feature=gene;description="erythrocyte membrane protein 1 (PfEMP1), pseudogene";]
Pf3D7_10_v3	850	5764	Pf3D7_01_v3-998-5894-for__Pf3D7_10_v3-850-5764-for	4914	+
Pf3D7_02_v3	908748	913650	Pf3D7_02_v3-908748-913650-for__Pf3D7_07_v3-1409862-1414840-for	4902	+	[ID=PF3D7_0223200;feature=gene;description=rifin;],[ID=PF3D7_0223400;feature=gene;description=rifin;],[ID=PF3D7_0223300;feature=gene;description="erythrocyte membrane protein 1 (PfEMP1), exon 2";]
Pf3D7_01_v3	998	5894	Pf3D7_01_v3-998-5894-for__Pf3D7_10_v3-850-5764-for	4896	+
Pf3D7_03_v3	1057345	1062237	Pf3D7_02_v3-2468-7358-rev__Pf3D7_03_v3-1057345-1062237-for	4892	+
Pf3D7_07_v3	1438735	1443627	Pf3D7_07_v3-1438735-1443627-for__Pf3D7_12_v3-2263915-2268771-for	4892	+
Pf3D7_07_v3	61900	66791	Pf3D7_02_v3-883239-888128-rev__Pf3D7_07_v3-61900-66791-for	4891	+	[ID=PF3D7_0701300;feature=gene;description=rifin, pseudogene;],[ID=PF3D7_0701400;feature=gene;description=exported protein family 4, pseudogene;]
Pf3D7_02_v3	2468	7358	Pf3D7_02_v3-2468-7358-for__Pf3D7_12_v3-1299-6185-for	4890	+
Pf3D7_02_v3	2468	7358	Pf3D7_02_v3-2468-7358-rev__Pf3D7_03_v3-1057345-1062237-for	4890	-
Pf3D7_02_v3	883239	888128	Pf3D7_02_v3-883239-888128-for__Pf3D7_06_v3-1323356-1328237-for	4889	+	[ID=PF3D7_0222300;feature=gene;description=exported protein family 4, pseudogene;],[ID=PF3D7_0222400;feature=gene;description=rifin, pseudogene;]
Pf3D7_02_v3	883239	888128	Pf3D7_02_v3-883239-888128-rev__Pf3D7_07_v3-61900-66791-for	4889	-	[ID=PF3D7_0222300;feature=gene;description=exported protein family 4, pseudogene;],[ID=PF3D7_0222400;feature=gene;description=rifin, pseudogene;]
Pf3D7_12_v3	1299	6185	Pf3D7_02_v3-2468-7358-for__Pf3D7_12_v3-1299-6185-for	4886	+
Pf3D7_06_v3	1323356	1328237	Pf3D7_02_v3-883239-888128-for__Pf3D7_06_v3-1323356-1328237-for	4881	+	[ID=PF3D7_0631600;feature=gene;description=exported+protein+family+4;],[ID=PF3D7_0631700;feature=gene;description=rifin, pseudogene;]
Pf3D7_09_v3	34936	39808	Pf3D7_09_v3-34936-39808-rev__Pf3D7_12_v3-2229485-2234416-for	4872	-	[ID=PF3D7_0900400;feature=gene;description=rifin;]
Pf3D7_12_v3	2263915	2268771	Pf3D7_07_v3-1438735-1443627-for__Pf3D7_12_v3-2263915-2268771-for	4856	+
Pf3D7_13_v3	63907	68736	Pf3D7_09_v3-59646-64466-for__Pf3D7_13_v3-63907-68736-for	4829	+	[ID=PF3D7_1301100;feature=gene;description="Plasmodium exported protein (PHISTa), unknown function, pseudogene";],[ID=PF3D7_1301000;feature=gene;description=rifin, pseudogene;]
Pf3D7_01_v3	1069	5894	Pf3D7_01_v3-1069-5894-rev__Pf3D7_03_v3-1057920-1062745-for	4825	-
Pf3D7_03_v3	1057920	1062745	Pf3D7_01_v3-1069-5894-rev__Pf3D7_03_v3-1057920-1062745-for	4825	+
Pf3D7_09_v3	59646	64466	Pf3D7_09_v3-59646-64466-for__Pf3D7_13_v3-63907-68736-for	4820	+	[ID=PF3D7_0901100;feature=gene;description=rifin;],[ID=PF3D7_0901200;feature=gene;description=Plasmodium exported protein, unknown function, fragment;]
Pf3D7_10_v3	1679197	1684016	Pf3D7_01_v3-3260-8070-rev__Pf3D7_10_v3-1679197-1684016-for	4819	+
Pf3D7_01_v3	3260	8070	Pf3D7_01_v3-3260-8070-rev__Pf3D7_10_v3-1679197-1684016-for	4810	-
Pf3D7_03_v3	55289	60099	Pf3D7_03_v3-55289-60099-rev__Pf3D7_07_v3-1405284-1410075-for	4810	-	[ID=PF3D7_0300600;feature=gene;description=Plasmodium exported protein, unknown function, fragment;],[ID=PF3D7_0300500;feature=gene;description=rifin;]
Pf3D7_09_v3	1535935	1540741	Pf3D7_05_v3-525-5261-rev__Pf3D7_09_v3-1535935-1540741-for	4806	+
Pf3D7_09_v3	1535935	1540741	Pf3D7_09_v3-1535935-1540741-rev__Pf3D7_13_v3-960-5696-for	4806	-
Pf3D7_07_v3	1405284	1410075	Pf3D7_03_v3-55289-60099-rev__Pf3D7_07_v3-1405284-1410075-for	4791	+	[ID=PF3D7_0732700;feature=gene;description=rifin;],[ID=PF3D7_0732600;feature=gene;description=Plasmodium exported protein, unknown function, fragment;]
Pf3D7_02_v3	49601	54376	Pf3D7_01_v3-82560-87325-for__Pf3D7_02_v3-49601-54376-for	4775	+	[ID=PF3D7_0200900;feature=gene;description=stevor, pseudogene;],[ID=PF3D7_0200700;feature=gene;description=rifin;],[ID=PF3D7_0200800;feature=gene;description="erythrocyte membrane protein 1 (PfEMP1), exon 2, pseudogene";]
Pf3D7_05_v3	525	5297	Pf3D7_05_v3-525-5297-for__Pf3D7_11_v3-1031-5784-for	4772	+
Pf3D7_13_v3	960	5732	Pf3D7_11_v3-1031-5784-for__Pf3D7_13_v3-960-5732-for	4772	+
Pf3D7_02_v3	49606	54376	Pf3D7_02_v3-49606-54376-rev__Pf3D7_07_v3-1386503-1391251-for	4770	-	[ID=PF3D7_0200900;feature=gene;description=stevor, pseudogene;],[ID=PF3D7_0200700;feature=gene;description=rifin;],[ID=PF3D7_0200800;feature=gene;description="erythrocyte membrane protein 1 (PfEMP1), exon 2, pseudogene";]
Pf3D7_03_v3	1055787	1060553	Pf3D7_03_v3-1055787-1060553-for__Pf3D7_10_v3-1679251-1684015-for	4766	+
Pf3D7_01_v3	82560	87325	Pf3D7_01_v3-82560-87325-for__Pf3D7_02_v3-49601-54376-for	4765	+	[ID=PF3D7_0101800;feature=gene;description=stevor;],[ID=PF3D7_0101700;feature=gene;description="erythrocyte membrane protein 1 (PfEMP1), exon 2, pseudogene";],[ID=PF3D7_0101600;feature=gene;description=rifin;]
Pf3D7_13_v3	2912807	2917572	Pf3D7_12_v3-2263313-2268075-for__Pf3D7_13_v3-2912807-2917572-for	4765	+
Pf3D7_10_v3	1679251	1684015	Pf3D7_03_v3-1055787-1060553-for__Pf3D7_10_v3-1679251-1684015-for	4764	+
Pf3D7_12_v3	2263313	2268075	Pf3D7_12_v3-2263313-2268075-for__Pf3D7_13_v3-2912807-2917572-for	4762	+
Pf3D7_10_v3	1679251	1684008	Pf3D7_10_v3-1679251-1684008-for__Pf3D7_12_v3-2264007-2268763-for	4757	+
Pf3D7_12_v3	2264007	2268763	Pf3D7_10_v3-1679251-1684008-for__Pf3D7_12_v3-2264007-2268763-for	4756	+
Pf3D7_11_v3	1031	5784	Pf3D7_05_v3-525-5297-for__Pf3D7_11_v3-1031-5784-for	4753	+
Pf3D7_11_v3	1031	5784	Pf3D7_11_v3-1031-5784-for__Pf3D7_13_v3-960-5732-for	4753	+
Pf3D7_07_v3	1386503	1391251	Pf3D7_02_v3-49606-54376-rev__Pf3D7_07_v3-1386503-1391251-for	4748	+	[ID=PF3D7_0732200;feature=gene;description=rifin;],[ID=PF3D7_0732000;feature=gene;description=stevor;],[ID=PF3D7_0732100;feature=gene;description="erythrocyte membrane protein 1 (PfEMP1), pseudogene";]
Pf3D7_05_v3	515	5261	Pf3D7_01_v3-624-5354-for__Pf3D7_05_v3-515-5261-for	4746	+
Pf3D7_13_v3	950	5696	Pf3D7_01_v3-624-5354-for__Pf3D7_13_v3-950-5696-for	4746	+
Pf3D7_05_v3	525	5261	Pf3D7_05_v3-525-5261-rev__Pf3D7_09_v3-1535935-1540741-for	4736	-
Pf3D7_13_v3	960	5696	Pf3D7_09_v3-1535935-1540741-rev__Pf3D7_13_v3-960-5696-for	4736	+
Pf3D7_01_v3	624	5354	Pf3D7_01_v3-624-5354-for__Pf3D7_05_v3-515-5261-for	4730	+
Pf3D7_01_v3	624	5354	Pf3D7_01_v3-624-5354-for__Pf3D7_13_v3-950-5696-for	4730	+
Pf3D7_02_v3	941832	946546	Pf3D7_02_v3-941832-946546-rev__Pf3D7_11_v3-1063-5748-for	4714	-
Pf3D7_02_v3	941832	946539	Pf3D7_02_v3-941832-946539-for__Pf3D7_03_v3-1058462-1063155-for	4707	+
Pf3D7_02_v3	941832	946537	Pf3D7_01_v3-672-5354-rev__Pf3D7_02_v3-941832-946537-for	4705	+
Pf3D7_01_v3	1341	6043	Pf3D7_01_v3-1341-6043-for__Pf3D7_12_v3-1063-5759-for	4702	+
Pf3D7_02_v3	941832	946531	Pf3D7_02_v3-941832-946531-rev__Pf3D7_08_v3-573-5272-for	4699	-
Pf3D7_08_v3	573	5272	Pf3D7_02_v3-941832-946531-rev__Pf3D7_08_v3-573-5272-for	4699	+
Pf3D7_12_v3	1063	5759	Pf3D7_01_v3-1341-6043-for__Pf3D7_12_v3-1063-5759-for	4696	+
Pf3D7_02_v3	874260	878956	Pf3D7_01_v3-74874-79527-rev__Pf3D7_02_v3-874260-878956-for	4696	+	[ID=PF3D7_0222000;feature=gene;description=exported+protein+family+1;],[ID=PF3D7_0221900;feature=gene;description="erythrocyte membrane protein 1 (PfEMP1), pseudogene";],[ID=PF3D7_0222100;feature=gene;description="Pfmc-2TM+Maurer's+cleft+two+transmembrane+protein";]
Pf3D7_03_v3	1058462	1063155	Pf3D7_02_v3-941832-946539-for__Pf3D7_03_v3-1058462-1063155-for	4693	+
Pf3D7_11_v3	1063	5748	Pf3D7_02_v3-941832-946546-rev__Pf3D7_11_v3-1063-5748-for	4685	+
Pf3D7_01_v3	672	5354	Pf3D7_01_v3-672-5354-rev__Pf3D7_02_v3-941832-946537-for	4682	-
Pf3D7_02_v3	49747	54426	Pf3D7_02_v3-49747-54426-for__Pf3D7_02_v3-900272-904950-rev	4679	+	[ID=PF3D7_0200900;feature=gene;description=stevor, pseudogene;],[ID=PF3D7_0200700;feature=gene;description=rifin;],[ID=PF3D7_0200800;feature=gene;description="erythrocyte membrane protein 1 (PfEMP1), exon 2, pseudogene";]
Pf3D7_02_v3	49747	54426	Pf3D7_02_v3-49747-54426-rev__Pf3D7_02_v3-900272-904950-for	4679	-	[ID=PF3D7_0200900;feature=gene;description=stevor, pseudogene;],[ID=PF3D7_0200700;feature=gene;description=rifin;],[ID=PF3D7_0200800;feature=gene;description="erythrocyte membrane protein 1 (PfEMP1), exon 2, pseudogene";]
Pf3D7_02_v3	900272	904950	Pf3D7_02_v3-49747-54426-for__Pf3D7_02_v3-900272-904950-rev	4678	-	[ID=PF3D7_0222900;feature=gene;description="erythrocyte membrane protein 1 (PfEMP1), exon 2, pseudogene";],[ID=PF3D7_0223100;feature=gene;description=rifin;],[ID=PF3D7_0222800;feature=gene;description=stevor;]
Pf3D7_02_v3	900272	904950	Pf3D7_02_v3-49747-54426-rev__Pf3D7_02_v3-900272-904950-for	4678	+	[ID=PF3D7_0222900;feature=gene;description="erythrocyte membrane protein 1 (PfEMP1), exon 2, pseudogene";],[ID=PF3D7_0223100;feature=gene;description=rifin;],[ID=PF3D7_0222800;feature=gene;description=stevor;]
Pf3D7_01_v3	74874	79527	Pf3D7_01_v3-74874-79527-rev__Pf3D7_02_v3-874260-878956-for	4653	-	[ID=PF3D7_0101500;feature=gene;description="erythrocyte membrane protein 1 (PfEMP1), exon 2, pseudogene";],[ID=PF3D7_0101300;feature=gene;description="Pfmc-2TM+Maurer's+cleft+two+transmembrane+protein";],[ID=PF3D7_0101400;feature=gene;description=exported protein family 1, pseudogene;]
Pf3D7_09_v3	1533424	1538063	Pf3D7_04_v3-2799-7436-rev__Pf3D7_09_v3-1533424-1538063-for	4639	+
Pf3D7_09_v3	1533424	1538063	Pf3D7_09_v3-1533424-1538063-for__Pf3D7_10_v3-1679413-1684047-for	4639	+
Pf3D7_05_v3	3135	7773	Pf3D7_05_v3-3135-7773-for__Pf3D7_09_v3-2048-6681-for	4638	+
Pf3D7_13_v3	3570	8208	Pf3D7_09_v3-2048-6681-for__Pf3D7_13_v3-3570-8208-for	4638	+
Pf3D7_04_v3	2799	7436	Pf3D7_04_v3-2799-7436-rev__Pf3D7_09_v3-1533424-1538063-for	4637	-
Pf3D7_04_v3	2801	7436	Pf3D7_04_v3-2801-7436-for__Pf3D7_12_v3-2947-7580-for	4635	+
Pf3D7_10_v3	1679413	1684047	Pf3D7_09_v3-1533424-1538063-for__Pf3D7_10_v3-1679413-1684047-for	4634	+
Pf3D7_12_v3	2947	7580	Pf3D7_04_v3-2801-7436-for__Pf3D7_12_v3-2947-7580-for	4633	+
Pf3D7_09_v3	2048	6681	Pf3D7_05_v3-3135-7773-for__Pf3D7_09_v3-2048-6681-for	4633	+
Pf3D7_09_v3	2048	6681	Pf3D7_09_v3-2048-6681-for__Pf3D7_13_v3-3570-8208-for	4633	+
Pf3D7_07_v3	1439029	1443658	Pf3D7_07_v3-1439029-1443658-for__Pf3D7_09_v3-1533471-1538063-for	4629	+
Pf3D7_02_v3	900319	904931	Pf3D7_02_v3-900319-904931-for__Pf3D7_07_v3-1386500-1391091-for	4612	+	[ID=PF3D7_0222900;feature=gene;description="erythrocyte membrane protein 1 (PfEMP1), exon 2, pseudogene";],[ID=PF3D7_0223100;feature=gene;description=rifin;],[ID=PF3D7_0222800;feature=gene;description=stevor;]
Pf3D7_09_v3	1533471	1538063	Pf3D7_07_v3-1439029-1443658-for__Pf3D7_09_v3-1533471-1538063-for	4592	+
Pf3D7_07_v3	1386500	1391091	Pf3D7_02_v3-900319-904931-for__Pf3D7_07_v3-1386500-1391091-for	4591	+	[ID=PF3D7_0732200;feature=gene;description=rifin;],[ID=PF3D7_0732000;feature=gene;description=stevor;],[ID=PF3D7_0732100;feature=gene;description="erythrocyte membrane protein 1 (PfEMP1), pseudogene";]
Pf3D7_02_v3	939368	943956	Pf3D7_02_v3-939368-943956-rev__Pf3D7_09_v3-2048-6634-for	4588	-
Pf3D7_09_v3	2048	6634	Pf3D7_02_v3-939368-943956-rev__Pf3D7_09_v3-2048-6634-for	4586	+
Pf3D7_07_v3	1439029	1443612	Pf3D7_07_v3-1439029-1443612-rev__Pf3D7_12_v3-2992-7533-for	4583	-
Pf3D7_02_v3	883239	887820	Pf3D7_02_v3-883239-887820-rev__Pf3D7_11_v3-76801-81361-for	4581	-	[ID=PF3D7_0222300;feature=gene;description=exported protein family 4, pseudogene;],[ID=PF3D7_0222400;feature=gene;description=rifin, pseudogene;]
Pf3D7_12_v3	2230148	2234713	Pf3D7_08_v3-1422493-1426996-for__Pf3D7_12_v3-2230148-2234713-for	4565	+	[ID=PF3D7_1254900;feature=gene;description=Plasmodium exported protein, unknown function, fragment;],[ID=PF3D7_1255000;feature=gene;description=rifin;]
Pf3D7_11_v3	76801	81361	Pf3D7_02_v3-883239-887820-rev__Pf3D7_11_v3-76801-81361-for	4560	+	[ID=PF3D7_1101400;feature=gene;description=rifin, pseudogene;],[ID=PF3D7_1101500;feature=gene;description=exported+protein+family+4;]
Pf3D7_02_v3	900319	904867	Pf3D7_01_v3-82789-87328-rev__Pf3D7_02_v3-900319-904867-for	4548	+	[ID=PF3D7_0222900;feature=gene;description="erythrocyte membrane protein 1 (PfEMP1), exon 2, pseudogene";],[ID=PF3D7_0223100;feature=gene;description=rifin;],[ID=PF3D7_0222800;feature=gene;description=stevor;]
Pf3D7_12_v3	2992	7533	Pf3D7_07_v3-1439029-1443612-rev__Pf3D7_12_v3-2992-7533-for	4541	+
Pf3D7_01_v3	82789	87328	Pf3D7_01_v3-82789-87328-rev__Pf3D7_02_v3-900319-904867-for	4539	-	[ID=PF3D7_0101800;feature=gene;description=stevor;],[ID=PF3D7_0101700;feature=gene;description="erythrocyte membrane protein 1 (PfEMP1), exon 2, pseudogene";],[ID=PF3D7_0101600;feature=gene;description=rifin;]
Pf3D7_06_v3	1306279	1310809	Pf3D7_06_v3-1306279-1310809-rev__Pf3D7_06_v3-55482-60002-for	4530	-
Pf3D7_04_v3	3293	7822	Pf3D7_04_v3-3293-7822-rev__Pf3D7_12_v3-2263784-2268309-for	4529	-
Pf3D7_12_v3	2263784	2268309	Pf3D7_04_v3-3293-7822-rev__Pf3D7_12_v3-2263784-2268309-for	4525	+
Pf3D7_06_v3	55482	60002	Pf3D7_06_v3-1306279-1310809-rev__Pf3D7_06_v3-55482-60002-for	4520	+
Pf3D7_08_v3	65948	70463	Pf3D7_08_v3-65948-70463-rev__Pf3D7_14_v3-3194705-3199173-for	4515	-	[ID=PF3D7_0800700;feature=gene;description="surface-associated+interspersed+protein+8.3+(SURFIN+8.3)";]
Pf3D7_08_v3	1422493	1426996	Pf3D7_08_v3-1422493-1426996-for__Pf3D7_12_v3-2230148-2234713-for	4503	+	[ID=PF3D7_0833200;feature=gene;description=rifin;]
Pf3D7_06_v3	1322684	1327166	Pf3D7_06_v3-1322684-1327166-for__Pf3D7_06_v3-39351-43827-rev	4482	+	[ID=PF3D7_0631600;feature=gene;description=exported+protein+family+4;],[ID=PF3D7_0631700;feature=gene;description=rifin, pseudogene;]
Pf3D7_06_v3	39351	43827	Pf3D7_06_v3-1322684-1327166-for__Pf3D7_06_v3-39351-43827-rev	4476	-	[ID=PF3D7_0601000;feature=gene;description=exported+protein+family+4;],[ID=PF3D7_0600900;feature=gene;description=rifin, pseudogene;]
Pf3D7_14_v3	3194705	3199173	Pf3D7_08_v3-65948-70463-rev__Pf3D7_14_v3-3194705-3199173-for	4468	+	[ID=PF3D7_1477600;feature=gene;description="surface-associated+interspersed+protein+14.1+(SURFIN+14.1)";]
Pf3D7_06_v3	1410211	1414606	Pf3D7_06_v3-1410211-1414606-rev__Pf3D7_09_v3-1620-6014-for	4395	-
Pf3D7_09_v3	1620	6014	Pf3D7_06_v3-1410211-1414606-rev__Pf3D7_09_v3-1620-6014-for	4394	+
Pf3D7_07_v3	69601	73959	Pf3D7_01_v3-73132-77445-for__Pf3D7_07_v3-69601-73959-for	4358	+	[ID=PF3D7_0701600;feature=gene;description="Pfmc-2TM+Maurer's+cleft+two+transmembrane+protein";],[ID=PF3D7_0701700;feature=gene;description=exported+protein+family+1;]
Pf3D7_07_v3	69601	73959	Pf3D7_07_v3-69601-73959-rev__Pf3D7_10_v3-1589509-1593773-for	4358	-	[ID=PF3D7_0701600;feature=gene;description="Pfmc-2TM+Maurer's+cleft+two+transmembrane+protein";],[ID=PF3D7_0701700;feature=gene;description=exported+protein+family+1;]
Pf3D7_02_v3	941832	946188	Pf3D7_02_v3-941832-946188-for__Pf3D7_12_v3-2266681-2271032-for	4356	+
Pf3D7_12_v3	2266681	2271032	Pf3D7_02_v3-941832-946188-for__Pf3D7_12_v3-2266681-2271032-for	4351	+
Pf3D7_14_v3	3255438	3259777	Pf3D7_12_v3-2181753-2186086-for__Pf3D7_14_v3-3255438-3259777-for	4339	+	[ID=PF3D7_1479000;feature=gene;description=acyl-CoA+synthetase;],[ID=PF3D7_1479100;feature=gene;description=Plasmodium exported protein, unknown function;]
Pf3D7_12_v3	2181753	2186086	Pf3D7_12_v3-2181753-2186086-for__Pf3D7_14_v3-3255438-3259777-for	4333	+	[ID=PF3D7_1253400;feature=gene;description=acyl-CoA+synthetase;],[ID=PF3D7_1253500;feature=gene;description=Plasmodium exported protein, unknown function;]
Pf3D7_02_v3	878947	883277	Pf3D7_01_v3-70606-74868-rev__Pf3D7_02_v3-878947-883277-for	4330	+	[ID=PF3D7_0222200;feature=gene;description=exported+protein+family+3;],[ID=PF3D7_0222100;feature=gene;description="Pfmc-2TM+Maurer's+cleft+two+transmembrane+protein";]
Pf3D7_10_v3	899	5223	Pf3D7_02_v3-941832-946151-rev__Pf3D7_10_v3-899-5223-for	4324	+
Pf3D7_02_v3	941832	946151	Pf3D7_02_v3-941832-946151-rev__Pf3D7_10_v3-899-5223-for	4319	-
Pf3D7_11_v3	5656	9971	Pf3D7_06_v3-1405768-1410079-rev__Pf3D7_11_v3-5656-9971-for	4315	+
Pf3D7_01_v3	73132	77445	Pf3D7_01_v3-73132-77445-for__Pf3D7_07_v3-69601-73959-for	4313	+	[ID=PF3D7_0101300;feature=gene;description="Pfmc-2TM+Maurer's+cleft+two+transmembrane+protein";],[ID=PF3D7_0101400;feature=gene;description=exported protein family 1, pseudogene;]
Pf3D7_06_v3	1405768	1410079	Pf3D7_06_v3-1405768-1410079-rev__Pf3D7_11_v3-5656-9971-for	4311	-
Pf3D7_11_v3	86299	90607	Pf3D7_01_v3-75247-79528-for__Pf3D7_11_v3-86299-90607-for	4308	+	[ID=PF3D7_1101800;feature=gene;description=exported+protein+family+1;],[ID=PF3D7_1101700;feature=gene;description="Pfmc-2TM+Maurer's+cleft+two+transmembrane+protein";],[ID=PF3D7_1101900;feature=gene;description="erythrocyte membrane protein 1 (PfEMP1), pseudogene";]
Pf3D7_03_v3	1011745	1016051	Pf3D7_03_v3-1011745-1016051-rev__Pf3D7_06_v3-39524-43820-for	4306	-	[ID=PF3D7_0324300;feature=gene;description=exported+protein+family+4;],[ID=PF3D7_0324400;feature=gene;description=rifin;]
Pf3D7_06_v3	39524	43820	Pf3D7_03_v3-1011745-1016051-rev__Pf3D7_06_v3-39524-43820-for	4296	+	[ID=PF3D7_0601000;feature=gene;description=exported+protein+family+4;],[ID=PF3D7_0600900;feature=gene;description=rifin, pseudogene;]
Pf3D7_06_v3	1314157	1318445	Pf3D7_01_v3-75247-79528-rev__Pf3D7_06_v3-1314157-1318445-for	4288	+	[ID=PF3D7_0631300;feature=gene;description=exported+protein+family+1;],[ID=PF3D7_0631400;feature=gene;description="Pfmc-2TM+Maurer's+cleft+two+transmembrane+protein";],[ID=PF3D7_0631200;feature=gene;description="erythrocyte membrane protein 1 (PfEMP1), pseudogene";]
Pf3D7_13_v3	2913288	2917572	Pf3D7_09_v3-2775-7058-rev__Pf3D7_13_v3-2913288-2917572-for	4284	+
Pf3D7_09_v3	2775	7058	Pf3D7_09_v3-2775-7058-rev__Pf3D7_13_v3-2913288-2917572-for	4283	-
Pf3D7_01_v3	75247	79528	Pf3D7_01_v3-75247-79528-for__Pf3D7_11_v3-86299-90607-for	4281	+	[ID=PF3D7_0101500;feature=gene;description="erythrocyte membrane protein 1 (PfEMP1), exon 2, pseudogene";],[ID=PF3D7_0101300;feature=gene;description="Pfmc-2TM+Maurer's+cleft+two+transmembrane+protein";],[ID=PF3D7_0101400;feature=gene;description=exported protein family 1, pseudogene;]
Pf3D7_01_v3	75247	79528	Pf3D7_01_v3-75247-79528-rev__Pf3D7_06_v3-1314157-1318445-for	4281	-	[ID=PF3D7_0101500;feature=gene;description="erythrocyte membrane protein 1 (PfEMP1), exon 2, pseudogene";],[ID=PF3D7_0101300;feature=gene;description="Pfmc-2TM+Maurer's+cleft+two+transmembrane+protein";],[ID=PF3D7_0101400;feature=gene;description=exported protein family 1, pseudogene;]
Pf3D7_10_v3	948	5223	Pf3D7_05_v3-1001-5261-for__Pf3D7_10_v3-948-5223-for	4275	+
Pf3D7_10_v3	948	5223	Pf3D7_10_v3-948-5223-for__Pf3D7_13_v3-1436-5696-for	4275	+
Pf3D7_05_v3	987	5261	Pf3D7_03_v3-1058462-1062732-rev__Pf3D7_05_v3-987-5261-for	4274	+
Pf3D7_13_v3	1422	5696	Pf3D7_03_v3-1058462-1062732-rev__Pf3D7_13_v3-1422-5696-for	4274	+
Pf3D7_03_v3	1058462	1062732	Pf3D7_03_v3-1058462-1062732-rev__Pf3D7_05_v3-987-5261-for	4270	-
Pf3D7_03_v3	1058462	1062732	Pf3D7_03_v3-1058462-1062732-rev__Pf3D7_13_v3-1422-5696-for	4270	-
Pf3D7_05_v3	995	5261	Pf3D7_05_v3-995-5261-for__Pf3D7_12_v3-840-5069-for	4266	+
Pf3D7_13_v3	1430	5696	Pf3D7_12_v3-840-5069-for__Pf3D7_13_v3-1430-5696-for	4266	+
Pf3D7_12_v3	2266681	2270946	Pf3D7_05_v3-1001-5261-rev__Pf3D7_12_v3-2266681-2270946-for	4265	+
Pf3D7_12_v3	2266681	2270946	Pf3D7_12_v3-2266681-2270946-rev__Pf3D7_13_v3-1436-5696-for	4265	-
Pf3D7_10_v3	1589509	1593773	Pf3D7_07_v3-69601-73959-rev__Pf3D7_10_v3-1589509-1593773-for	4264	+	[ID=PF3D7_1039600;feature=gene;description=exported protein family 1, pseudogene;],[ID=PF3D7_1039700;feature=gene;description="Pfmc-2TM+Maurer's+cleft+two+transmembrane+protein";]
Pf3D7_01_v3	70606	74868	Pf3D7_01_v3-70606-74868-rev__Pf3D7_02_v3-878947-883277-for	4262	-	[ID=PF3D7_0101300;feature=gene;description="Pfmc-2TM+Maurer's+cleft+two+transmembrane+protein";],[ID=PF3D7_0101200;feature=gene;description=exported+protein+family+3;]
Pf3D7_02_v3	58257	62519	Pf3D7_02_v3-58257-62519-rev__Pf3D7_06_v3-1343250-1347501-for	4262	-	[ID=PF3D7_0201100;feature=gene;description=Plasmodium exported protein, unknown function, fragment;],[ID=PF3D7_0201000;feature=gene;description=rifin;]
Pf3D7_05_v3	1001	5261	Pf3D7_05_v3-1001-5261-for__Pf3D7_10_v3-948-5223-for	4260	+
Pf3D7_05_v3	1001	5261	Pf3D7_05_v3-1001-5261-rev__Pf3D7_12_v3-2266681-2270946-for	4260	-
Pf3D7_13_v3	1436	5696	Pf3D7_10_v3-948-5223-for__Pf3D7_13_v3-1436-5696-for	4260	+
Pf3D7_13_v3	1436	5696	Pf3D7_12_v3-2266681-2270946-rev__Pf3D7_13_v3-1436-5696-for	4260	+
Pf3D7_09_v3	1535458	1539714	Pf3D7_02_v3-2468-6719-rev__Pf3D7_09_v3-1535458-1539714-for	4256	+
Pf3D7_02_v3	2468	6719	Pf3D7_02_v3-2468-6719-rev__Pf3D7_09_v3-1535458-1539714-for	4251	-
Pf3D7_06_v3	1343250	1347501	Pf3D7_02_v3-58257-62519-rev__Pf3D7_06_v3-1343250-1347501-for	4251	+	[ID=PF3D7_0632300;feature=gene;description=rifin;]
Pf3D7_12_v3	840	5069	Pf3D7_05_v3-995-5261-for__Pf3D7_12_v3-840-5069-for	4229	+
Pf3D7_12_v3	840	5069	Pf3D7_12_v3-840-5069-for__Pf3D7_13_v3-1430-5696-for	4229	+
Pf3D7_13_v3	2913278	2917500	Pf3D7_04_v3-3602-7822-rev__Pf3D7_13_v3-2913278-2917500-for	4222	+
Pf3D7_04_v3	3602	7822	Pf3D7_04_v3-3602-7822-rev__Pf3D7_13_v3-2913278-2917500-for	4220	-
Pf3D7_08_v3	1744	5962	Pf3D7_02_v3-2715-6932-for__Pf3D7_08_v3-1744-5962-for	4218	+
Pf3D7_02_v3	2715	6932	Pf3D7_02_v3-2715-6932-for__Pf3D7_08_v3-1744-5962-for	4217	+
Pf3D7_06_v3	60017	64209	Pf3D7_06_v3-60017-64209-for__Pf3D7_11_v3-96781-100965-for	4192	+
Pf3D7_11_v3	96781	100965	Pf3D7_06_v3-60017-64209-for__Pf3D7_11_v3-96781-100965-for	4184	+
Pf3D7_10_v3	1679413	1683585	Pf3D7_10_v3-1679413-1683585-rev__Pf3D7_12_v3-3408-7580-for	4172	-
Pf3D7_12_v3	3408	7580	Pf3D7_10_v3-1679413-1683585-rev__Pf3D7_12_v3-3408-7580-for	4172	+
Pf3D7_04_v3	4834	8982	Pf3D7_04_v3-4834-8982-rev__Pf3D7_06_v3-1405929-1410077-for	4148	-
Pf3D7_06_v3	1405929	1410077	Pf3D7_04_v3-4834-8982-rev__Pf3D7_06_v3-1405929-1410077-for	4148	+
Pf3D7_05_v3	3135	7281	Pf3D7_05_v3-3135-7281-rev__Pf3D7_06_v3-1410036-1414178-for	4146	-
Pf3D7_13_v3	3570	7716	Pf3D7_06_v3-1410036-1414178-rev__Pf3D7_13_v3-3570-7716-for	4146	+
Pf3D7_06_v3	1410036	1414178	Pf3D7_05_v3-3135-7281-rev__Pf3D7_06_v3-1410036-1414178-for	4142	+
Pf3D7_06_v3	1410036	1414178	Pf3D7_06_v3-1410036-1414178-rev__Pf3D7_13_v3-3570-7716-for	4142	-
Pf3D7_01_v3	3230	7371	Pf3D7_01_v3-3230-7371-rev__Pf3D7_06_v3-1410037-1414178-for	4141	-
Pf3D7_06_v3	1410037	1414178	Pf3D7_01_v3-3230-7371-rev__Pf3D7_06_v3-1410037-1414178-for	4141	+
Pf3D7_06_v3	1410037	1414178	Pf3D7_06_v3-1410037-1414178-rev__Pf3D7_12_v3-2947-7087-for	4141	-
Pf3D7_12_v3	2947	7087	Pf3D7_06_v3-1410037-1414178-rev__Pf3D7_12_v3-2947-7087-for	4140	+
Pf3D7_12_v3	1711929	1716057	Pf3D7_07_v3-508397-512510-rev__Pf3D7_12_v3-1711929-1716057-for	4128	+	[ID=PF3D7_1240500;feature=gene;description=Plasmodium+RNA+of+unknown+function+RUF6;],[ID=PF3D7_1240400;feature=gene;description=erythrocyte membrane protein 1, PfEMP1;]
Pf3D7_07_v3	508397	512510	Pf3D7_07_v3-508397-512510-rev__Pf3D7_12_v3-1711929-1716057-for	4113	-	[ID=PF3D7_0711600;feature=gene;description=Plasmodium+RNA+of+unknown+function+RUF6;],[ID=PF3D7_0711700;feature=gene;description=erythrocyte membrane protein 1, PfEMP1;]
Pf3D7_12_v3	1728081	1732165	Pf3D7_07_v3-522926-526999-rev__Pf3D7_12_v3-1728081-1732165-for	4084	+	[ID=PF3D7_1240700;feature=gene;description=rifin, pseudogene;],[ID=PF3D7_1240800;feature=gene;description=Plasmodium+RNA+of+unknown+function+RUF6;]
Pf3D7_07_v3	522926	526999	Pf3D7_07_v3-522926-526999-rev__Pf3D7_12_v3-1728081-1732165-for	4073	-	[ID=PF3D7_0711900;feature=gene;description=rifin, pseudogene;],[ID=PF3D7_0711800;feature=gene;description=Plasmodium+RNA+of+unknown+function+RUF6;]
Pf3D7_11_v3	5832	9896	Pf3D7_10_v3-5997-10050-for__Pf3D7_11_v3-5832-9896-for	4064	+
Pf3D7_13_v3	2913511	2917572	Pf3D7_10_v3-1679260-1683318-for__Pf3D7_13_v3-2913511-2917572-for	4061	+
Pf3D7_10_v3	1679260	1683318	Pf3D7_10_v3-1679260-1683318-for__Pf3D7_13_v3-2913511-2917572-for	4058	+
Pf3D7_10_v3	5824	9880	Pf3D7_03_v3-7871-11897-for__Pf3D7_10_v3-5824-9880-for	4056	+
Pf3D7_10_v3	5997	10050	Pf3D7_10_v3-5997-10050-for__Pf3D7_11_v3-5832-9896-for	4053	+
Pf3D7_02_v3	937738	941780	Pf3D7_02_v3-937738-941780-for__Pf3D7_07_v3-1437411-1441441-for	4042	+
Pf3D7_05_v3	3863	7902	Pf3D7_05_v3-3863-7902-rev__Pf3D7_13_v3-2913535-2917572-for	4039	-
Pf3D7_13_v3	4298	8337	Pf3D7_13_v3-2913535-2917572-for__Pf3D7_13_v3-4298-8337-rev	4039	-
Pf3D7_13_v3	4298	8337	Pf3D7_13_v3-2913535-2917572-rev__Pf3D7_13_v3-4298-8337-for	4039	+
Pf3D7_13_v3	2913535	2917572	Pf3D7_05_v3-3863-7902-rev__Pf3D7_13_v3-2913535-2917572-for	4037	+
Pf3D7_13_v3	2913535	2917572	Pf3D7_13_v3-2913535-2917572-for__Pf3D7_13_v3-4298-8337-rev	4037	+
Pf3D7_13_v3	2913535	2917572	Pf3D7_13_v3-2913535-2917572-rev__Pf3D7_13_v3-4298-8337-for	4037	-
Pf3D7_07_v3	1437411	1441441	Pf3D7_02_v3-937738-941780-for__Pf3D7_07_v3-1437411-1441441-for	4030	+
Pf3D7_03_v3	7871	11897	Pf3D7_03_v3-7871-11897-for__Pf3D7_10_v3-5824-9880-for	4026	+
Pf3D7_10_v3	5997	10011	Pf3D7_06_v3-1405906-1409903-rev__Pf3D7_10_v3-5997-10011-for	4014	+
Pf3D7_06_v3	1406077	1410079	Pf3D7_06_v3-1406077-1410079-for__Pf3D7_13_v3-2912265-2916267-for	4002	+
Pf3D7_13_v3	2912265	2916267	Pf3D7_06_v3-1406077-1410079-for__Pf3D7_13_v3-2912265-2916267-for	4002	+
Pf3D7_09_v3	1481956	1485958	Pf3D7_06_v3-22837-26811-rev__Pf3D7_09_v3-1481956-1485958-for	4002	+	[ID=PF3D7_0937500;feature=gene;description=rifin;]
Pf3D7_09_v3	2811	6811	Pf3D7_03_v3-6602-10601-for__Pf3D7_09_v3-2811-6811-for	4000	+
Pf3D7_03_v3	6602	10601	Pf3D7_03_v3-6602-10601-for__Pf3D7_09_v3-2811-6811-for	3999	+
Pf3D7_06_v3	1405906	1409903	Pf3D7_06_v3-1405906-1409903-rev__Pf3D7_10_v3-5997-10011-for	3997	-
Pf3D7_02_v3	909943	913931	Pf3D7_02_v3-909943-913931-rev__Pf3D7_06_v3-15728-19702-for	3988	-	[ID=PF3D7_0223400;feature=gene;description=rifin;],[ID=PF3D7_0223300;feature=gene;description="erythrocyte membrane protein 1 (PfEMP1), exon 2";]
Pf3D7_03_v3	1054409	1058390	Pf3D7_03_v3-1054409-1058390-rev__Pf3D7_09_v3-4242-8222-for	3981	-
Pf3D7_09_v3	4242	8222	Pf3D7_03_v3-1054409-1058390-rev__Pf3D7_09_v3-4242-8222-for	3980	+
Pf3D7_03_v3	6622	10601	Pf3D7_02_v3-939200-943172-rev__Pf3D7_03_v3-6622-10601-for	3979	+
Pf3D7_06_v3	15728	19702	Pf3D7_02_v3-909943-913931-rev__Pf3D7_06_v3-15728-19702-for	3974	+	[ID=PF3D7_0600300;feature=gene;description=rifin;],[ID=PF3D7_0600400;feature=gene;description=erythrocyte membrane protein 1, PfEMP1;]
Pf3D7_06_v3	22837	26811	Pf3D7_06_v3-22837-26811-rev__Pf3D7_09_v3-1481956-1485958-for	3974	-	[ID=PF3D7_0600500;feature=gene;description=rifin;]
Pf3D7_02_v3	939200	943172	Pf3D7_02_v3-939200-943172-rev__Pf3D7_03_v3-6622-10601-for	3972	-
Pf3D7_09_v3	1534091	1538063	Pf3D7_06_v3-1410211-1414180-for__Pf3D7_09_v3-1534091-1538063-for	3972	+
Pf3D7_04_v3	5008	8979	Pf3D7_04_v3-5008-8979-for__Pf3D7_10_v3-5997-9964-for	3971	+
Pf3D7_06_v3	1410211	1414180	Pf3D7_06_v3-1410211-1414180-for__Pf3D7_09_v3-1534091-1538063-for	3969	+
Pf3D7_03_v3	1056617	1060584	Pf3D7_03_v3-1056617-1060584-for__Pf3D7_06_v3-1410211-1414178-for	3967	+
Pf3D7_06_v3	1410211	1414178	Pf3D7_03_v3-1056617-1060584-for__Pf3D7_06_v3-1410211-1414178-for	3967	+
Pf3D7_10_v3	5997	9964	Pf3D7_04_v3-5008-8979-for__Pf3D7_10_v3-5997-9964-for	3967	+
Pf3D7_06_v3	1410211	1414178	Pf3D7_06_v3-1410211-1414178-rev__Pf3D7_11_v3-3627-7593-for	3967	-
Pf3D7_11_v3	3627	7593	Pf3D7_06_v3-1410211-1414178-rev__Pf3D7_11_v3-3627-7593-for	3966	+
Pf3D7_11_v3	5842	9808	Pf3D7_09_v3-4264-8222-for__Pf3D7_11_v3-5842-9808-for	3966	+
Pf3D7_12_v3	2262663	2266621	Pf3D7_02_v3-937835-941772-for__Pf3D7_12_v3-2262663-2266621-for	3958	+
Pf3D7_09_v3	4264	8222	Pf3D7_09_v3-4264-8222-for__Pf3D7_11_v3-5842-9808-for	3958	+
Pf3D7_07_v3	1440771	1444712	Pf3D7_04_v3-1194545-1198442-for__Pf3D7_07_v3-1440771-1444712-for	3941	+
Pf3D7_02_v3	937835	941772	Pf3D7_02_v3-937835-941772-for__Pf3D7_12_v3-2262663-2266621-for	3937	+
Pf3D7_06_v3	46102	50031	Pf3D7_01_v3-545823-549667-rev__Pf3D7_06_v3-46102-50031-for	3929	+	[ID=PF3D7_0601300;feature=gene;description=exported+protein+family+1;],[ID=PF3D7_0601200;feature=gene;description="Pfmc-2TM+Maurer's+cleft+two+transmembrane+protein";]
Pf3D7_02_v3	876674	880588	Pf3D7_01_v3-545823-549667-for__Pf3D7_02_v3-876674-880588-for	3914	+	[ID=PF3D7_0222000;feature=gene;description=exported+protein+family+1;],[ID=PF3D7_0222100;feature=gene;description="Pfmc-2TM+Maurer's+cleft+two+transmembrane+protein";]
Pf3D7_13_v3	2913664	2917572	Pf3D7_12_v3-3675-7580-rev__Pf3D7_13_v3-2913664-2917572-for	3908	+
Pf3D7_12_v3	3675	7580	Pf3D7_12_v3-3675-7580-rev__Pf3D7_13_v3-2913664-2917572-for	3905	-
Pf3D7_12_v3	2014	5916	Pf3D7_07_v3-2689-6590-for__Pf3D7_12_v3-2014-5916-for	3902	+
Pf3D7_02_v3	3188	7089	Pf3D7_02_v3-3188-7089-for__Pf3D7_07_v3-2689-6590-for	3901	+
Pf3D7_07_v3	2689	6590	Pf3D7_02_v3-3188-7089-for__Pf3D7_07_v3-2689-6590-for	3901	+
Pf3D7_07_v3	2689	6590	Pf3D7_07_v3-2689-6590-for__Pf3D7_12_v3-2014-5916-for	3901	+
Pf3D7_07_v3	69732	73631	Pf3D7_01_v3-545823-549667-rev__Pf3D7_07_v3-69732-73631-for	3899	+	[ID=PF3D7_0701600;feature=gene;description="Pfmc-2TM+Maurer's+cleft+two+transmembrane+protein";],[ID=PF3D7_0701700;feature=gene;description=exported+protein+family+1;]
Pf3D7_04_v3	1194545	1198442	Pf3D7_04_v3-1194545-1198442-for__Pf3D7_07_v3-1440771-1444712-for	3897	+
Pf3D7_06_v3	1406028	1409916	Pf3D7_03_v3-8031-11900-rev__Pf3D7_06_v3-1406028-1409916-for	3888	+
Pf3D7_12_v3	5140	9024	Pf3D7_09_v3-4241-8114-for__Pf3D7_12_v3-5140-9024-for	3884	+
Pf3D7_13_v3	2912241	2916123	Pf3D7_02_v3-937906-941780-for__Pf3D7_13_v3-2912241-2916123-for	3882	+
Pf3D7_10_v3	1677971	1681853	Pf3D7_10_v3-1677971-1681853-rev__Pf3D7_13_v3-5767-9642-for	3882	-
Pf3D7_13_v3	5767	9642	Pf3D7_10_v3-1677971-1681853-rev__Pf3D7_13_v3-5767-9642-for	3875	+
Pf3D7_02_v3	937906	941780	Pf3D7_02_v3-937906-941780-for__Pf3D7_13_v3-2912241-2916123-for	3874	+
Pf3D7_09_v3	4241	8114	Pf3D7_09_v3-4241-8114-for__Pf3D7_12_v3-5140-9024-for	3873	+
Pf3D7_03_v3	8031	11900	Pf3D7_03_v3-8031-11900-rev__Pf3D7_06_v3-1406028-1409916-for	3869	-
Pf3D7_11_v3	84329	88193	Pf3D7_01_v3-545827-549667-rev__Pf3D7_11_v3-84329-88193-for	3864	+	[ID=PF3D7_1101800;feature=gene;description=exported+protein+family+1;],[ID=PF3D7_1101700;feature=gene;description="Pfmc-2TM+Maurer's+cleft+two+transmembrane+protein";]
Pf3D7_06_v3	1307148	1311009	Pf3D7_06_v3-1307148-1311009-for__Pf3D7_06_v3-55280-59135-rev	3861	+
Pf3D7_01_v3	73263	77118	Pf3D7_01_v3-545823-549667-for__Pf3D7_01_v3-73263-77118-rev	3855	-	[ID=PF3D7_0101300;feature=gene;description="Pfmc-2TM+Maurer's+cleft+two+transmembrane+protein";],[ID=PF3D7_0101400;feature=gene;description=exported protein family 1, pseudogene;]
Pf3D7_01_v3	73263	77118	Pf3D7_01_v3-545823-549667-rev__Pf3D7_01_v3-73263-77118-for	3855	+	[ID=PF3D7_0101300;feature=gene;description="Pfmc-2TM+Maurer's+cleft+two+transmembrane+protein";],[ID=PF3D7_0101400;feature=gene;description=exported protein family 1, pseudogene;]
Pf3D7_06_v3	55280	59135	Pf3D7_06_v3-1307148-1311009-for__Pf3D7_06_v3-55280-59135-rev	3855	-
Pf3D7_01_v3	545823	549676	Pf3D7_01_v3-545823-549676-for__Pf3D7_10_v3-1589836-1593643-for	3853	+	[ID=PF3D7_0114000;feature=gene;description=exported+protein+family+1;],[ID=PF3D7_0114100;feature=gene;description="Pfmc-2TM+Maurer's+cleft+two+transmembrane+protein";]
Pf3D7_06_v3	1316568	1320417	Pf3D7_01_v3-545827-549667-for__Pf3D7_06_v3-1316568-1320417-for	3849	+	[ID=PF3D7_0631300;feature=gene;description=exported+protein+family+1;],[ID=PF3D7_0631400;feature=gene;description="Pfmc-2TM+Maurer's+cleft+two+transmembrane+protein";]
Pf3D7_01_v3	545823	549667	Pf3D7_01_v3-545823-549667-for__Pf3D7_01_v3-73263-77118-rev	3844	+	[ID=PF3D7_0114000;feature=gene;description=exported+protein+family+1;],[ID=PF3D7_0114100;feature=gene;description="Pfmc-2TM+Maurer's+cleft+two+transmembrane+protein";]
Pf3D7_01_v3	545823	549667	Pf3D7_01_v3-545823-549667-for__Pf3D7_02_v3-876674-880588-for	3844	+	[ID=PF3D7_0114000;feature=gene;description=exported+protein+family+1;],[ID=PF3D7_0114100;feature=gene;description="Pfmc-2TM+Maurer's+cleft+two+transmembrane+protein";]
Pf3D7_01_v3	545823	549667	Pf3D7_01_v3-545823-549667-for__Pf3D7_03_v3-1005642-1009469-for	3844	+	[ID=PF3D7_0114000;feature=gene;description=exported+protein+family+1;],[ID=PF3D7_0114100;feature=gene;description="Pfmc-2TM+Maurer's+cleft+two+transmembrane+protein";]
Pf3D7_01_v3	545823	549667	Pf3D7_01_v3-545823-549667-rev__Pf3D7_01_v3-73263-77118-for	3844	-	[ID=PF3D7_0114000;feature=gene;description=exported+protein+family+1;],[ID=PF3D7_0114100;feature=gene;description="Pfmc-2TM+Maurer's+cleft+two+transmembrane+protein";]
Pf3D7_01_v3	545823	549667	Pf3D7_01_v3-545823-549667-rev__Pf3D7_06_v3-46102-50031-for	3844	-	[ID=PF3D7_0114000;feature=gene;description=exported+protein+family+1;],[ID=PF3D7_0114100;feature=gene;description="Pfmc-2TM+Maurer's+cleft+two+transmembrane+protein";]
Pf3D7_01_v3	545823	549667	Pf3D7_01_v3-545823-549667-rev__Pf3D7_07_v3-69732-73631-for	3844	-	[ID=PF3D7_0114000;feature=gene;description=exported+protein+family+1;],[ID=PF3D7_0114100;feature=gene;description="Pfmc-2TM+Maurer's+cleft+two+transmembrane+protein";]
Pf3D7_01_v3	545827	549667	Pf3D7_01_v3-545827-549667-for__Pf3D7_06_v3-1316568-1320417-for	3840	+	[ID=PF3D7_0114000;feature=gene;description=exported+protein+family+1;],[ID=PF3D7_0114100;feature=gene;description="Pfmc-2TM+Maurer's+cleft+two+transmembrane+protein";]
Pf3D7_01_v3	545827	549667	Pf3D7_01_v3-545827-549667-rev__Pf3D7_11_v3-84329-88193-for	3840	-	[ID=PF3D7_0114000;feature=gene;description=exported+protein+family+1;],[ID=PF3D7_0114100;feature=gene;description="Pfmc-2TM+Maurer's+cleft+two+transmembrane+protein";]
Pf3D7_02_v3	874260	878099	Pf3D7_02_v3-874260-878099-rev__Pf3D7_11_v3-60641-64478-for	3839	-	[ID=PF3D7_0222000;feature=gene;description=exported+protein+family+1;],[ID=PF3D7_0221900;feature=gene;description="erythrocyte membrane protein 1 (PfEMP1), pseudogene";]
Pf3D7_11_v3	60641	64478	Pf3D7_02_v3-874260-878099-rev__Pf3D7_11_v3-60641-64478-for	3837	+	[ID=PF3D7_1101000;feature=gene;description="erythrocyte membrane protein 1 (PfEMP1), pseudogene";],[ID=PF3D7_1100900;feature=gene;description=exported protein family 1, pseudogene;]
Pf3D7_02_v3	883239	887068	Pf3D7_01_v3-66547-70354-rev__Pf3D7_02_v3-883239-887068-for	3829	+	[ID=PF3D7_0222300;feature=gene;description=exported protein family 4, pseudogene;],[ID=PF3D7_0222400;feature=gene;description=rifin, pseudogene;]
Pf3D7_03_v3	1005642	1009469	Pf3D7_01_v3-545823-549667-for__Pf3D7_03_v3-1005642-1009469-for	3827	+	[ID=PF3D7_0324100;feature=gene;description="Pfmc-2TM+Maurer's+cleft+two+transmembrane+protein";],[ID=PF3D7_0324000;feature=gene;description=exported+protein+family+1;]
Pf3D7_02_v3	883239	887061	Pf3D7_02_v3-883239-887061-rev__Pf3D7_06_v3-39344-43155-for	3822	-	[ID=PF3D7_0222300;feature=gene;description=exported protein family 4, pseudogene;],[ID=PF3D7_0222400;feature=gene;description=rifin, pseudogene;]
Pf3D7_06_v3	39344	43155	Pf3D7_02_v3-883239-887061-rev__Pf3D7_06_v3-39344-43155-for	3811	+	[ID=PF3D7_0601000;feature=gene;description=exported+protein+family+4;],[ID=PF3D7_0600900;feature=gene;description=rifin, pseudogene;]
Pf3D7_10_v3	1589836	1593643	Pf3D7_01_v3-545823-549676-for__Pf3D7_10_v3-1589836-1593643-for	3807	+	[ID=PF3D7_1039600;feature=gene;description=exported protein family 1, pseudogene;],[ID=PF3D7_1039700;feature=gene;description="Pfmc-2TM+Maurer's+cleft+two+transmembrane+protein";]
Pf3D7_01_v3	66547	70354	Pf3D7_01_v3-66547-70354-rev__Pf3D7_02_v3-883239-887068-for	3807	-	[ID=PF3D7_0101100;feature=gene;description=exported+protein+family+4;],[ID=PF3D7_0101000;feature=gene;description=rifin;]
Pf3D7_01_v3	46812	50617	Pf3D7_01_v3-46812-50617-for__Pf3D7_06_v3-23031-26811-for	3805	+	[ID=PF3D7_0100400;feature=gene;description=rifin;]
Pf3D7_11_v3	2021849	2025630	Pf3D7_11_v3-2021849-2025630-for__Pf3D7_11_v3-42466-46237-rev	3781	+	[ID=PF3D7_1150300;feature=gene;description=rifin;]
Pf3D7_11_v3	2021849	2025630	Pf3D7_11_v3-2021849-2025630-rev__Pf3D7_11_v3-42466-46237-for	3781	-	[ID=PF3D7_1150300;feature=gene;description=rifin;]
Pf3D7_06_v3	23031	26811	Pf3D7_01_v3-46812-50617-for__Pf3D7_06_v3-23031-26811-for	3780	+	[ID=PF3D7_0600500;feature=gene;description=rifin;]
Pf3D7_01_v3	1577	5354	Pf3D7_01_v3-1577-5354-for__Pf3D7_02_v3-2468-6243-for	3777	+
Pf3D7_09_v3	1535218	1538994	Pf3D7_07_v3-2689-6460-rev__Pf3D7_09_v3-1535218-1538994-for	3776	+
Pf3D7_02_v3	2468	6243	Pf3D7_01_v3-1577-5354-for__Pf3D7_02_v3-2468-6243-for	3775	+
Pf3D7_03_v3	1054306	1058079	Pf3D7_03_v3-1054306-1058079-rev__Pf3D7_10_v3-6296-10065-for	3773	-
Pf3D7_03_v3	1057744	1061517	Pf3D7_03_v3-1057744-1061517-rev__Pf3D7_07_v3-2689-6460-for	3773	-
Pf3D7_07_v3	2689	6460	Pf3D7_03_v3-1057744-1061517-rev__Pf3D7_07_v3-2689-6460-for	3771	+
Pf3D7_07_v3	2689	6460	Pf3D7_07_v3-2689-6460-for__Pf3D7_11_v3-2694-6465-for	3771	+
Pf3D7_11_v3	2694	6465	Pf3D7_07_v3-2689-6460-for__Pf3D7_11_v3-2694-6465-for	3771	+
Pf3D7_07_v3	2689	6460	Pf3D7_07_v3-2689-6460-rev__Pf3D7_09_v3-1535218-1538994-for	3771	-
Pf3D7_11_v3	42466	46237	Pf3D7_11_v3-2021849-2025630-for__Pf3D7_11_v3-42466-46237-rev	3771	-	[ID=PF3D7_1100300;feature=gene;description=rifin;]
Pf3D7_11_v3	42466	46237	Pf3D7_11_v3-2021849-2025630-rev__Pf3D7_11_v3-42466-46237-for	3771	+	[ID=PF3D7_1100300;feature=gene;description=rifin;]
Pf3D7_10_v3	6296	10065	Pf3D7_03_v3-1054306-1058079-rev__Pf3D7_10_v3-6296-10065-for	3769	+
Pf3D7_02_v3	937479	941233	Pf3D7_02_v3-937479-941233-for__Pf3D7_08_v3-1462430-1466150-for	3754	+
Pf3D7_05_v3	4227	7980	Pf3D7_03_v3-6928-10679-for__Pf3D7_05_v3-4227-7980-for	3753	+
Pf3D7_13_v3	4662	8415	Pf3D7_03_v3-6928-10679-for__Pf3D7_13_v3-4662-8415-for	3753	+
Pf3D7_03_v3	6928	10679	Pf3D7_03_v3-6928-10679-for__Pf3D7_05_v3-4227-7980-for	3751	+
Pf3D7_03_v3	6928	10679	Pf3D7_03_v3-6928-10679-for__Pf3D7_13_v3-4662-8415-for	3751	+
Pf3D7_01_v3	2297	6043	Pf3D7_01_v3-2297-6043-for__Pf3D7_07_v3-2689-6433-for	3746	+
Pf3D7_07_v3	2689	6433	Pf3D7_01_v3-2297-6043-for__Pf3D7_07_v3-2689-6433-for	3744	+
Pf3D7_09_v3	1477799	1481522	Pf3D7_01_v3-51060-54714-rev__Pf3D7_09_v3-1477799-1481522-for	3723	+	[ID=PF3D7_0937400;feature=gene;description=rifin;],[ID=PF3D7_0937500;feature=gene;description=rifin;]
Pf3D7_08_v3	1462430	1466150	Pf3D7_02_v3-937479-941233-for__Pf3D7_08_v3-1462430-1466150-for	3720	+
Pf3D7_13_v3	66557	70268	Pf3D7_12_v3-2198076-2201745-rev__Pf3D7_13_v3-66557-70268-for	3711	+	[ID=PF3D7_1301100;feature=gene;description="Plasmodium exported protein (PHISTa), unknown function, pseudogene";],[ID=PF3D7_1301000;feature=gene;description=rifin, pseudogene;]
Pf3D7_02_v3	2535	6243	Pf3D7_02_v3-2535-6243-rev__Pf3D7_12_v3-2266681-2270387-for	3708	-
Pf3D7_12_v3	2266681	2270387	Pf3D7_02_v3-2535-6243-rev__Pf3D7_12_v3-2266681-2270387-for	3706	+
Pf3D7_04_v3	557622	561326	Pf3D7_04_v3-557622-561326-rev__Pf3D7_12_v3-1728081-1731765-for	3704	-	[ID=PF3D7_0412600;feature=gene;description=rifin, pseudogene;]
Pf3D7_01_v3	579041	582741	Pf3D7_01_v3-579041-582741-for__Pf3D7_14_v3-3194705-3198403-for	3700	+	[ID=PF3D7_0115000;feature=gene;description="surface-associated+interspersed+protein+1.3+(SURFIN+1.3)";]
Pf3D7_14_v3	3194705	3198403	Pf3D7_01_v3-579041-582741-for__Pf3D7_14_v3-3194705-3198403-for	3698	+	[ID=PF3D7_1477600;feature=gene;description="surface-associated+interspersed+protein+14.1+(SURFIN+14.1)";]
Pf3D7_12_v3	1728081	1731765	Pf3D7_04_v3-557622-561326-rev__Pf3D7_12_v3-1728081-1731765-for	3684	+	[ID=PF3D7_1240700;feature=gene;description=rifin, pseudogene;]
Pf3D7_04_v3	75288	78971	Pf3D7_03_v3-57562-61233-for__Pf3D7_04_v3-75288-78971-for	3683	+	[ID=PF3D7_0401100;feature=gene;description=Plasmodium exported protein, unknown function, fragment;]
Pf3D7_03_v3	57562	61233	Pf3D7_03_v3-57562-61233-for__Pf3D7_04_v3-75288-78971-for	3671	+	[ID=PF3D7_0300600;feature=gene;description=Plasmodium exported protein, unknown function, fragment;]
Pf3D7_03_v3	1054409	1058079	Pf3D7_02_v3-937799-941449-for__Pf3D7_03_v3-1054409-1058079-for	3670	+
Pf3D7_12_v3	2198076	2201745	Pf3D7_12_v3-2198076-2201745-rev__Pf3D7_13_v3-66557-70268-for	3669	-	[ID=PF3D7_1253900;feature=gene;description="Plasmodium exported protein (PHISTa), unknown function, pseudogene";],[ID=PF3D7_1254000;feature=gene;description=rifin;]
Pf3D7_01_v3	51060	54714	Pf3D7_01_v3-51060-54714-rev__Pf3D7_09_v3-1477799-1481522-for	3654	-	[ID=PF3D7_0100500;feature=gene;description="erythrocyte membrane protein 1 (PfEMP1), exon 1, pseudogene";],[ID=PF3D7_0100600;feature=gene;description=rifin;],[ID=PF3D7_0100400;feature=gene;description=rifin;]
Pf3D7_02_v3	937799	941449	Pf3D7_02_v3-937799-941449-for__Pf3D7_03_v3-1054409-1058079-for	3650	+
Pf3D7_04_v3	1166565	1170211	Pf3D7_04_v3-1166565-1170211-for__Pf3D7_08_v3-1429297-1432911-for	3646	+	[ID=PF3D7_0425900;feature=gene;description=rifin;],[ID=PF3D7_0425800;feature=gene;description=erythrocyte membrane protein 1, PfEMP1;]
Pf3D7_06_v3	48809	52445	Pf3D7_06_v3-48809-52445-for__Pf3D7_11_v3-60866-64479-for	3636	+	[ID=PF3D7_0601300;feature=gene;description=exported+protein+family+1;],[ID=PF3D7_0601400;feature=gene;description="erythrocyte membrane protein 1 (PfEMP1), pseudogene";]
Pf3D7_03_v3	1003229	1006862	Pf3D7_03_v3-1003229-1006862-rev__Pf3D7_11_v3-60866-64478-for	3633	-	[ID=PF3D7_0323900;feature=gene;description="erythrocyte membrane protein 1 (PfEMP1), exon 2, pseudogene";],[ID=PF3D7_0324000;feature=gene;description=exported+protein+family+1;]
Pf3D7_09_v3	1489070	1492692	Pf3D7_02_v3-909943-913561-for__Pf3D7_09_v3-1489070-1492692-for	3622	+	[ID=PF3D7_0937700;feature=gene;description=rifin;],[ID=PF3D7_0937600;feature=gene;description=erythrocyte membrane protein 1, PfEMP1;]
Pf3D7_02_v3	909943	913561	Pf3D7_02_v3-909943-913561-for__Pf3D7_09_v3-1489070-1492692-for	3618	+	[ID=PF3D7_0223400;feature=gene;description=rifin;],[ID=PF3D7_0223300;feature=gene;description="erythrocyte membrane protein 1 (PfEMP1), exon 2";]
Pf3D7_10_v3	1587418	1591035	Pf3D7_07_v3-49675-53273-rev__Pf3D7_10_v3-1587418-1591035-for	3617	+	[ID=PF3D7_1039600;feature=gene;description=exported protein family 1, pseudogene;],[ID=PF3D7_1039400;feature=gene;description="erythrocyte membrane protein 1 (PfEMP1), pseudogene";]
Pf3D7_10_v3	1587418	1591035	Pf3D7_10_v3-1587418-1591035-rev__Pf3D7_11_v3-60866-64479-for	3617	-	[ID=PF3D7_1039600;feature=gene;description=exported protein family 1, pseudogene;],[ID=PF3D7_1039400;feature=gene;description="erythrocyte membrane protein 1 (PfEMP1), pseudogene";]
Pf3D7_03_v3	1012477	1016093	Pf3D7_02_v3-883325-886920-for__Pf3D7_03_v3-1012477-1016093-for	3616	+	[ID=PF3D7_0324300;feature=gene;description=exported+protein+family+4;],[ID=PF3D7_0324400;feature=gene;description=rifin;]
Pf3D7_03_v3	1012477	1016093	Pf3D7_03_v3-1012477-1016093-for__Pf3D7_06_v3-1323448-1327032-for	3616	+	[ID=PF3D7_0324300;feature=gene;description=exported+protein+family+4;],[ID=PF3D7_0324400;feature=gene;description=rifin;]
Pf3D7_08_v3	1429297	1432911	Pf3D7_04_v3-1166565-1170211-for__Pf3D7_08_v3-1429297-1432911-for	3614	+	[ID=PF3D7_0833400;feature=gene;description=rifin;],[ID=PF3D7_0833300;feature=gene;description="erythrocyte membrane protein 1 (PfEMP1), exon 2, pseudogene";]
Pf3D7_11_v3	60866	64479	Pf3D7_06_v3-48809-52445-for__Pf3D7_11_v3-60866-64479-for	3613	+	[ID=PF3D7_1101000;feature=gene;description="erythrocyte membrane protein 1 (PfEMP1), pseudogene";],[ID=PF3D7_1100900;feature=gene;description=exported protein family 1, pseudogene;]
Pf3D7_11_v3	60866	64479	Pf3D7_10_v3-1587418-1591035-rev__Pf3D7_11_v3-60866-64479-for	3613	+	[ID=PF3D7_1101000;feature=gene;description="erythrocyte membrane protein 1 (PfEMP1), pseudogene";],[ID=PF3D7_1100900;feature=gene;description=exported protein family 1, pseudogene;]
Pf3D7_11_v3	60866	64478	Pf3D7_03_v3-1003229-1006862-rev__Pf3D7_11_v3-60866-64478-for	3612	+	[ID=PF3D7_1101000;feature=gene;description="erythrocyte membrane protein 1 (PfEMP1), pseudogene";],[ID=PF3D7_1100900;feature=gene;description=exported protein family 1, pseudogene;]
Pf3D7_06_v3	1410211	1413822	Pf3D7_06_v3-1410211-1413822-for__Pf3D7_12_v3-2264837-2268445-for	3611	+
Pf3D7_12_v3	2264837	2268445	Pf3D7_06_v3-1410211-1413822-for__Pf3D7_12_v3-2264837-2268445-for	3608	+
Pf3D7_07_v3	49675	53273	Pf3D7_07_v3-49675-53273-rev__Pf3D7_10_v3-1587418-1591035-for	3598	-	[ID=PF3D7_0700900;feature=gene;description=exported protein family 1, pseudogene;],[ID=PF3D7_0701000;feature=gene;description="erythrocyte membrane protein 1 (PfEMP1), pseudogene";]
Pf3D7_02_v3	883325	886920	Pf3D7_02_v3-883325-886920-for__Pf3D7_03_v3-1012477-1016093-for	3595	+	[ID=PF3D7_0222300;feature=gene;description=exported protein family 4, pseudogene;],[ID=PF3D7_0222400;feature=gene;description=rifin, pseudogene;]
Pf3D7_06_v3	1323448	1327032	Pf3D7_03_v3-1012477-1016093-for__Pf3D7_06_v3-1323448-1327032-for	3584	+	[ID=PF3D7_0631600;feature=gene;description=exported+protein+family+4;],[ID=PF3D7_0631700;feature=gene;description=rifin, pseudogene;]
Pf3D7_01_v3	5916	9488	Pf3D7_01_v3-5916-9488-rev__Pf3D7_07_v3-1437366-1440930-for	3572	-
Pf3D7_07_v3	1437366	1440930	Pf3D7_01_v3-5916-9488-rev__Pf3D7_07_v3-1437366-1440930-for	3564	+
Pf3D7_04_v3	2894	6455	Pf3D7_04_v3-2894-6455-for__Pf3D7_08_v3-3243-6802-for	3561	+
Pf3D7_08_v3	3243	6802	Pf3D7_04_v3-2894-6455-for__Pf3D7_08_v3-3243-6802-for	3559	+
Pf3D7_13_v3	66714	70268	Pf3D7_13_v3-66714-70268-rev__Pf3D7_14_v3-3262693-3266231-for	3554	-	[ID=PF3D7_1301100;feature=gene;description="Plasmodium exported protein (PHISTa), unknown function, pseudogene";],[ID=PF3D7_1301000;feature=gene;description=rifin, pseudogene;]
Pf3D7_10_v3	3082	6635	Pf3D7_04_v3-2801-6335-for__Pf3D7_10_v3-3082-6635-for	3553	+
Pf3D7_14_v3	28325	31874	Pf3D7_14_v3-28325-31874-for__Pf3D7_14_v3-3262691-3266238-rev	3549	+	[ID=PF3D7_1400900;feature=gene;description="Plasmodium exported protein (PHISTa), unknown function, pseudogene";],[ID=PF3D7_1400800;feature=gene;description=rifin;]
Pf3D7_14_v3	28325	31874	Pf3D7_14_v3-28325-31874-rev__Pf3D7_14_v3-3262691-3266238-for	3549	-	[ID=PF3D7_1400900;feature=gene;description="Plasmodium exported protein (PHISTa), unknown function, pseudogene";],[ID=PF3D7_1400800;feature=gene;description=rifin;]
Pf3D7_14_v3	3262691	3266238	Pf3D7_14_v3-28325-31874-for__Pf3D7_14_v3-3262691-3266238-rev	3547	-	[ID=PF3D7_1479300;feature=gene;description="Plasmodium exported protein (PHISTa), unknown function, pseudogene";],[ID=PF3D7_1479400;feature=gene;description=rifin;]
Pf3D7_14_v3	3262691	3266238	Pf3D7_14_v3-28325-31874-rev__Pf3D7_14_v3-3262691-3266238-for	3547	+	[ID=PF3D7_1479300;feature=gene;description="Plasmodium exported protein (PHISTa), unknown function, pseudogene";],[ID=PF3D7_1479400;feature=gene;description=rifin;]
Pf3D7_03_v3	1054139	1057682	Pf3D7_03_v3-1054139-1057682-rev__Pf3D7_05_v3-6040-9577-for	3543	-
Pf3D7_03_v3	1054139	1057682	Pf3D7_03_v3-1054139-1057682-rev__Pf3D7_13_v3-6475-10012-for	3543	-
Pf3D7_14_v3	3262693	3266231	Pf3D7_13_v3-66714-70268-rev__Pf3D7_14_v3-3262693-3266231-for	3538	+	[ID=PF3D7_1479300;feature=gene;description="Plasmodium exported protein (PHISTa), unknown function, pseudogene";],[ID=PF3D7_1479400;feature=gene;description=rifin;]
Pf3D7_05_v3	6040	9577	Pf3D7_03_v3-1054139-1057682-rev__Pf3D7_05_v3-6040-9577-for	3537	+
Pf3D7_13_v3	6475	10012	Pf3D7_03_v3-1054139-1057682-rev__Pf3D7_13_v3-6475-10012-for	3537	+
Pf3D7_04_v3	2801	6335	Pf3D7_04_v3-2801-6335-for__Pf3D7_10_v3-3082-6635-for	3534	+
Pf3D7_10_v3	1640410	1643939	Pf3D7_04_v3-38623-42139-rev__Pf3D7_10_v3-1640410-1643939-for	3529	+	[ID=PF3D7_1041300;feature=gene;description=erythrocyte membrane protein 1, PfEMP1;],[ID=PF3D7_1041200;feature=gene;description=rifin;]
Pf3D7_01_v3	54281	57805	Pf3D7_01_v3-54281-57805-for__Pf3D7_09_v3-34056-37558-for	3524	+	[ID=PF3D7_0100600;feature=gene;description=rifin;],[ID=PF3D7_0100700;feature=gene;description=Plasmodium exported protein, unknown function, fragment;]
Pf3D7_01_v3	3364	6883	Pf3D7_01_v3-3364-6883-for__Pf3D7_08_v3-3284-6802-for	3519	+
Pf3D7_08_v3	3284	6802	Pf3D7_01_v3-3364-6883-for__Pf3D7_08_v3-3284-6802-for	3518	+
Pf3D7_04_v3	38623	42139	Pf3D7_04_v3-38623-42139-rev__Pf3D7_10_v3-1640410-1643939-for	3516	-	[ID=PF3D7_0400200;feature=gene;description="erythrocyte membrane protein 1 (PfEMP1), exon 2, pseudogene";],[ID=PF3D7_0400300;feature=gene;description=rifin;]
Pf3D7_14_v3	28365	31874	Pf3D7_12_v3-2198074-2201560-rev__Pf3D7_14_v3-28365-31874-for	3509	+	[ID=PF3D7_1400900;feature=gene;description="Plasmodium exported protein (PHISTa), unknown function, pseudogene";],[ID=PF3D7_1400800;feature=gene;description=rifin;]
Pf3D7_09_v3	34056	37558	Pf3D7_01_v3-54281-57805-for__Pf3D7_09_v3-34056-37558-for	3502	+	[ID=PF3D7_0900300;feature=gene;description=rifin;]
Pf3D7_03_v3	1054366	1057862	Pf3D7_03_v3-1054366-1057862-for__Pf3D7_08_v3-1462657-1466150-for	3496	+
Pf3D7_08_v3	1462657	1466150	Pf3D7_03_v3-1054366-1057862-for__Pf3D7_08_v3-1462657-1466150-for	3493	+
Pf3D7_10_v3	6476	9963	Pf3D7_01_v3-5916-9395-for__Pf3D7_10_v3-6476-9963-for	3487	+
Pf3D7_12_v3	2198074	2201560	Pf3D7_12_v3-2198074-2201560-rev__Pf3D7_14_v3-28365-31874-for	3486	-	[ID=PF3D7_1253900;feature=gene;description="Plasmodium exported protein (PHISTa), unknown function, pseudogene";],[ID=PF3D7_1254000;feature=gene;description=rifin;]
Pf3D7_07_v3	1405465	1408947	Pf3D7_04_v3-74175-77644-rev__Pf3D7_07_v3-1405465-1408947-for	3482	+	[ID=PF3D7_0732700;feature=gene;description=rifin;],[ID=PF3D7_0732600;feature=gene;description=Plasmodium exported protein, unknown function, fragment;]
Pf3D7_09_v3	4235	7714	Pf3D7_01_v3-5419-8896-for__Pf3D7_09_v3-4235-7714-for	3479	+
Pf3D7_01_v3	5916	9395	Pf3D7_01_v3-5916-9395-for__Pf3D7_10_v3-6476-9963-for	3479	+
Pf3D7_01_v3	5419	8896	Pf3D7_01_v3-5419-8896-for__Pf3D7_09_v3-4235-7714-for	3477	+
Pf3D7_03_v3	128	3598	Pf3D7_03_v3-1064520-1067959-rev__Pf3D7_03_v3-128-3598-for	3470	+
Pf3D7_04_v3	74175	77644	Pf3D7_04_v3-74175-77644-rev__Pf3D7_07_v3-1405465-1408947-for	3469	-	[ID=PF3D7_0401100;feature=gene;description=Plasmodium exported protein, unknown function, fragment;],[ID=PF3D7_0401000;feature=gene;description=rifin;]
Pf3D7_12_v3	2231751	2235208	Pf3D7_02_v3-57843-61220-rev__Pf3D7_12_v3-2231751-2235208-for	3457	+	[ID=PF3D7_1254900;feature=gene;description=Plasmodium exported protein, unknown function, fragment;],[ID=PF3D7_1255000;feature=gene;description=rifin;]
Pf3D7_13_v3	2882812	2886264	Pf3D7_13_v3-27318-30748-for__Pf3D7_13_v3-2882812-2886264-rev	3452	-	[ID=PF3D7_1373500;feature=gene;description=erythrocyte membrane protein 1, PfEMP1;],[ID=PF3D7_1373400;feature=gene;description=rifin;]
Pf3D7_13_v3	2882812	2886264	Pf3D7_13_v3-27318-30748-rev__Pf3D7_13_v3-2882812-2886264-for	3452	+	[ID=PF3D7_1373500;feature=gene;description=erythrocyte membrane protein 1, PfEMP1;],[ID=PF3D7_1373400;feature=gene;description=rifin;]
Pf3D7_07_v3	563626	567075	Pf3D7_07_v3-563626-567075-rev__Pf3D7_08_v3-447712-451148-for	3449	-	[ID=PF3D7_0712600;feature=gene;description=erythrocyte membrane protein 1, PfEMP1;],[ID=PF3D7_0712500;feature=gene;description=rifin, pseudogene;]
Pf3D7_09_v3	30239	33684	Pf3D7_09_v3-30239-33684-for__Pf3D7_12_v3-26769-30209-for	3445	+	[ID=PF3D7_0900300;feature=gene;description=rifin;],[ID=PF3D7_0900200;feature=gene;description=rifin;]
Pf3D7_03_v3	1054418	1057862	Pf3D7_03_v3-1054418-1057862-for__Pf3D7_04_v3-1191914-1195356-for	3444	+
Pf3D7_04_v3	1191914	1195356	Pf3D7_03_v3-1054418-1057862-for__Pf3D7_04_v3-1191914-1195356-for	3442	+
Pf3D7_12_v3	26769	30209	Pf3D7_09_v3-30239-33684-for__Pf3D7_12_v3-26769-30209-for	3440	+	[ID=PF3D7_1200300;feature=gene;description=rifin;],[ID=PF3D7_1200200;feature=gene;description=rifin;]
Pf3D7_03_v3	1064520	1067959	Pf3D7_03_v3-1064520-1067959-rev__Pf3D7_03_v3-128-3598-for	3439	-
Pf3D7_08_v3	447712	451148	Pf3D7_07_v3-563626-567075-rev__Pf3D7_08_v3-447712-451148-for	3436	+	[ID=PF3D7_0808700;feature=gene;description=erythrocyte membrane protein 1, PfEMP1;],[ID=PF3D7_0808800;feature=gene;description=rifin;]
Pf3D7_08_v3	3366	6802	Pf3D7_08_v3-3366-6802-rev__Pf3D7_10_v3-1680394-1683830-for	3436	-
Pf3D7_10_v3	1680394	1683830	Pf3D7_08_v3-3366-6802-rev__Pf3D7_10_v3-1680394-1683830-for	3436	+
Pf3D7_13_v3	27318	30748	Pf3D7_13_v3-27318-30748-for__Pf3D7_13_v3-2882812-2886264-rev	3430	+	[ID=PF3D7_1300100;feature=gene;description=erythrocyte membrane protein 1, PfEMP1;],[ID=PF3D7_1300200;feature=gene;description=rifin;]
Pf3D7_13_v3	27318	30748	Pf3D7_13_v3-27318-30748-rev__Pf3D7_13_v3-2882812-2886264-for	3430	-	[ID=PF3D7_1300100;feature=gene;description=erythrocyte membrane protein 1, PfEMP1;],[ID=PF3D7_1300200;feature=gene;description=rifin;]
Pf3D7_07_v3	1405928	1409354	Pf3D7_01_v3-54398-57822-rev__Pf3D7_07_v3-1405928-1409354-for	3426	+	[ID=PF3D7_0732700;feature=gene;description=rifin;],[ID=PF3D7_0732600;feature=gene;description=Plasmodium exported protein, unknown function, fragment;]
Pf3D7_07_v3	1405928	1409354	Pf3D7_06_v3-1344533-1347950-for__Pf3D7_07_v3-1405928-1409354-for	3426	+	[ID=PF3D7_0732700;feature=gene;description=rifin;],[ID=PF3D7_0732600;feature=gene;description=Plasmodium exported protein, unknown function, fragment;]
Pf3D7_01_v3	54398	57822	Pf3D7_01_v3-54398-57822-rev__Pf3D7_07_v3-1405928-1409354-for	3424	-	[ID=PF3D7_0100600;feature=gene;description=rifin;],[ID=PF3D7_0100700;feature=gene;description=Plasmodium exported protein, unknown function, fragment;]
Pf3D7_12_v3	2231751	2235169	Pf3D7_01_v3-54445-57821-rev__Pf3D7_12_v3-2231751-2235169-for	3418	+	[ID=PF3D7_1254900;feature=gene;description=Plasmodium exported protein, unknown function, fragment;],[ID=PF3D7_1255000;feature=gene;description=rifin;]
Pf3D7_12_v3	2231751	2235169	Pf3D7_06_v3-1344534-1347903-for__Pf3D7_12_v3-2231751-2235169-for	3418	+	[ID=PF3D7_1254900;feature=gene;description=Plasmodium exported protein, unknown function, fragment;],[ID=PF3D7_1255000;feature=gene;description=rifin;]
Pf3D7_06_v3	1344533	1347950	Pf3D7_06_v3-1344533-1347950-for__Pf3D7_07_v3-1405928-1409354-for	3417	+	[ID=PF3D7_0632300;feature=gene;description=rifin;]
Pf3D7_11_v3	947	4364	Pf3D7_11_v3-947-4364-rev__Pf3D7_13_v3-2917501-2920876-for	3417	-
Pf3D7_01_v3	579196	582612	Pf3D7_01_v3-579196-582612-for__Pf3D7_08_v3-1326642-1330055-for	3416	+	[ID=PF3D7_0115000;feature=gene;description="surface-associated+interspersed+protein+1.3+(SURFIN+1.3)";]
Pf3D7_13_v3	2914156	2917572	Pf3D7_06_v3-1410036-1413450-for__Pf3D7_13_v3-2914156-2917572-for	3416	+
Pf3D7_08_v3	66892	70308	Pf3D7_08_v3-1326642-1330055-for__Pf3D7_08_v3-66892-70308-rev	3416	-	[ID=PF3D7_0800700;feature=gene;description="surface-associated+interspersed+protein+8.3+(SURFIN+8.3)";]
Pf3D7_08_v3	66892	70308	Pf3D7_08_v3-1326642-1330055-rev__Pf3D7_08_v3-66892-70308-for	3416	+	[ID=PF3D7_0800700;feature=gene;description="surface-associated+interspersed+protein+8.3+(SURFIN+8.3)";]
Pf3D7_06_v3	1410036	1413450	Pf3D7_06_v3-1410036-1413450-for__Pf3D7_13_v3-2914156-2917572-for	3414	+
Pf3D7_11_v3	6347	9761	Pf3D7_08_v3-1462765-1466150-rev__Pf3D7_11_v3-6347-9761-for	3414	+
Pf3D7_08_v3	1326642	1330055	Pf3D7_01_v3-579196-582612-for__Pf3D7_08_v3-1326642-1330055-for	3413	+	[ID=PF3D7_0831100;feature=gene;description="surface-associated+interspersed+protein+8.1+(SURFIN+8.1)";]
Pf3D7_08_v3	1326642	1330055	Pf3D7_08_v3-1326642-1330055-for__Pf3D7_08_v3-66892-70308-rev	3413	+	[ID=PF3D7_0831100;feature=gene;description="surface-associated+interspersed+protein+8.1+(SURFIN+8.1)";]
Pf3D7_08_v3	1326642	1330055	Pf3D7_08_v3-1326642-1330055-for__Pf3D7_14_v3-3194861-3198274-for	3413	+	[ID=PF3D7_0831100;feature=gene;description="surface-associated+interspersed+protein+8.1+(SURFIN+8.1)";]
Pf3D7_14_v3	3194861	3198274	Pf3D7_08_v3-1326642-1330055-for__Pf3D7_14_v3-3194861-3198274-for	3413	+	[ID=PF3D7_1477600;feature=gene;description="surface-associated+interspersed+protein+14.1+(SURFIN+14.1)";]
Pf3D7_08_v3	1326642	1330055	Pf3D7_08_v3-1326642-1330055-rev__Pf3D7_08_v3-66892-70308-for	3413	-	[ID=PF3D7_0831100;feature=gene;description="surface-associated+interspersed+protein+8.1+(SURFIN+8.1)";]
Pf3D7_04_v3	1191949	1195356	Pf3D7_01_v3-5952-9351-rev__Pf3D7_04_v3-1191949-1195356-for	3407	+
Pf3D7_07_v3	1411350	1414751	Pf3D7_07_v3-1411350-1414751-for__Pf3D7_09_v3-1489306-1492692-for	3401	+	[ID=PF3D7_0732800;feature=gene;description="erythrocyte membrane protein 1 (PfEMP1), exon 2";],[ID=PF3D7_0732900;feature=gene;description=rifin;]
Pf3D7_01_v3	5952	9351	Pf3D7_01_v3-5952-9351-rev__Pf3D7_04_v3-1191949-1195356-for	3399	-
Pf3D7_03_v3	56520	59919	Pf3D7_03_v3-56520-59919-rev__Pf3D7_12_v3-2231271-2234663-for	3399	-	[ID=PF3D7_0300600;feature=gene;description=Plasmodium exported protein, unknown function, fragment;],[ID=PF3D7_0300500;feature=gene;description=rifin;]
Pf3D7_04_v3	74526	77923	Pf3D7_04_v3-74526-77923-for__Pf3D7_09_v3-34936-38316-for	3397	+	[ID=PF3D7_0401100;feature=gene;description=Plasmodium exported protein, unknown function, fragment;]
Pf3D7_03_v3	1008800	1012196	Pf3D7_02_v3-879919-883300-for__Pf3D7_03_v3-1008800-1012196-for	3396	+	[ID=PF3D7_0324200;feature=gene;description=exported+protein+family+3;]
Pf3D7_04_v3	73785	77180	Pf3D7_04_v3-73785-77180-rev__Pf3D7_06_v3-1344534-1347903-for	3395	-	[ID=PF3D7_0401100;feature=gene;description=Plasmodium exported protein, unknown function, fragment;],[ID=PF3D7_0401000;feature=gene;description=rifin;]
Pf3D7_12_v3	2231271	2234663	Pf3D7_03_v3-56520-59919-rev__Pf3D7_12_v3-2231271-2234663-for	3392	+	[ID=PF3D7_1254900;feature=gene;description=Plasmodium exported protein, unknown function, fragment;],[ID=PF3D7_1255000;feature=gene;description=rifin;]
Pf3D7_06_v3	1405841	1409232	Pf3D7_06_v3-1405841-1409232-rev__Pf3D7_09_v3-4925-8316-for	3391	-
Pf3D7_09_v3	4925	8316	Pf3D7_06_v3-1405841-1409232-rev__Pf3D7_09_v3-4925-8316-for	3391	+
Pf3D7_12_v3	2229629	2233019	Pf3D7_12_v3-2229629-2233019-for__Pf3D7_13_v3-2872977-2876319-for	3390	+	[ID=PF3D7_1254800;feature=gene;description=rifin;],[ID=PF3D7_1254900;feature=gene;description=Plasmodium exported protein, unknown function, fragment;]
Pf3D7_09_v3	1489306	1492692	Pf3D7_07_v3-1411350-1414751-for__Pf3D7_09_v3-1489306-1492692-for	3386	+	[ID=PF3D7_0937700;feature=gene;description=rifin;],[ID=PF3D7_0937600;feature=gene;description=erythrocyte membrane protein 1, PfEMP1;]
Pf3D7_08_v3	1462765	1466150	Pf3D7_08_v3-1462765-1466150-rev__Pf3D7_11_v3-6347-9761-for	3385	-
Pf3D7_12_v3	2231280	2234663	Pf3D7_07_v3-1405465-1408844-for__Pf3D7_12_v3-2231280-2234663-for	3383	+	[ID=PF3D7_1254900;feature=gene;description=Plasmodium exported protein, unknown function, fragment;],[ID=PF3D7_1255000;feature=gene;description=rifin;]
Pf3D7_02_v3	879919	883300	Pf3D7_02_v3-879919-883300-for__Pf3D7_03_v3-1008800-1012196-for	3381	+	[ID=PF3D7_0222200;feature=gene;description=exported+protein+family+3;]
Pf3D7_09_v3	34936	38316	Pf3D7_04_v3-74526-77923-for__Pf3D7_09_v3-34936-38316-for	3380	+
Pf3D7_07_v3	1405465	1408844	Pf3D7_07_v3-1405465-1408844-for__Pf3D7_12_v3-2231280-2234663-for	3379	+	[ID=PF3D7_0732700;feature=gene;description=rifin;],[ID=PF3D7_0732600;feature=gene;description=Plasmodium exported protein, unknown function, fragment;]
Pf3D7_02_v3	57843	61220	Pf3D7_02_v3-57843-61220-rev__Pf3D7_12_v3-2231751-2235208-for	3377	-	[ID=PF3D7_0201100;feature=gene;description=Plasmodium exported protein, unknown function, fragment;],[ID=PF3D7_0201000;feature=gene;description=rifin;]
Pf3D7_01_v3	54445	57821	Pf3D7_01_v3-54445-57821-rev__Pf3D7_12_v3-2231751-2235169-for	3376	-	[ID=PF3D7_0100600;feature=gene;description=rifin;],[ID=PF3D7_0100700;feature=gene;description=Plasmodium exported protein, unknown function, fragment;]
Pf3D7_13_v3	2917501	2920876	Pf3D7_11_v3-947-4364-rev__Pf3D7_13_v3-2917501-2920876-for	3375	+
Pf3D7_06_v3	1344534	1347903	Pf3D7_04_v3-73785-77180-rev__Pf3D7_06_v3-1344534-1347903-for	3369	+	[ID=PF3D7_0632300;feature=gene;description=rifin;]
Pf3D7_06_v3	1344534	1347903	Pf3D7_06_v3-1344534-1347903-for__Pf3D7_12_v3-2231751-2235169-for	3369	+	[ID=PF3D7_0632300;feature=gene;description=rifin;]
Pf3D7_12_v3	2262720	2266082	Pf3D7_08_v3-1462798-1466150-for__Pf3D7_12_v3-2262720-2266082-for	3362	+
Pf3D7_08_v3	1462798	1466150	Pf3D7_08_v3-1462798-1466150-for__Pf3D7_12_v3-2262720-2266082-for	3352	+
Pf3D7_09_v3	36320	39664	Pf3D7_09_v3-36320-39664-rev__Pf3D7_13_v3-2872977-2876310-for	3344	-	[ID=PF3D7_0900400;feature=gene;description=rifin;]
Pf3D7_13_v3	2872977	2876319	Pf3D7_12_v3-2229629-2233019-for__Pf3D7_13_v3-2872977-2876319-for	3342	+	[ID=PF3D7_1373100;feature=gene;description=rifin;],[ID=PF3D7_1373200;feature=gene;description=Plasmodium exported protein, unknown function, fragment;]
Pf3D7_10_v3	1636496	1639836	Pf3D7_10_v3-1636496-1639836-for__Pf3D7_14_v3-3273565-3276885-for	3340	+	[ID=PF3D7_1041200;feature=gene;description=rifin;],[ID=PF3D7_1041100;feature=gene;description=rifin;]
Pf3D7_13_v3	2912240	2915576	Pf3D7_08_v3-1462822-1466150-for__Pf3D7_13_v3-2912240-2915576-for	3336	+
Pf3D7_04_v3	5667	9002	Pf3D7_04_v3-5667-9002-rev__Pf3D7_08_v3-1462690-1466008-for	3335	-
Pf3D7_13_v3	2872977	2876310	Pf3D7_09_v3-36320-39664-rev__Pf3D7_13_v3-2872977-2876310-for	3333	+	[ID=PF3D7_1373100;feature=gene;description=rifin;],[ID=PF3D7_1373200;feature=gene;description=Plasmodium exported protein, unknown function, fragment;]
Pf3D7_07_v3	31034	34365	Pf3D7_07_v3-31034-34365-for__Pf3D7_11_v3-49072-52403-for	3331	+	[ID=PF3D7_0700300;feature=gene;description=rifin;],[ID=PF3D7_0700200;feature=gene;description=rifin;]
Pf3D7_11_v3	49072	52403	Pf3D7_07_v3-31034-34365-for__Pf3D7_11_v3-49072-52403-for	3331	+	[ID=PF3D7_1100400;feature=gene;description=rifin;],[ID=PF3D7_1100500;feature=gene;description=rifin;]
Pf3D7_04_v3	978955	982284	Pf3D7_04_v3-978955-982284-rev__Pf3D7_12_v3-1729545-1732872-for	3329	-	[ID=PF3D7_0421400;feature=gene;description=Plasmodium+RNA+of+unknown+function+RUF6;],[ID=PF3D7_0421500;feature=gene;description=rifin, pseudogene;]
Pf3D7_07_v3	2891	6220	Pf3D7_07_v3-2891-6220-rev__Pf3D7_12_v3-2266204-2269532-for	3329	-
Pf3D7_12_v3	2266204	2269532	Pf3D7_07_v3-2891-6220-rev__Pf3D7_12_v3-2266204-2269532-for	3328	+
Pf3D7_08_v3	1462822	1466150	Pf3D7_08_v3-1462822-1466150-for__Pf3D7_13_v3-2912240-2915576-for	3328	+
Pf3D7_12_v3	1729545	1732872	Pf3D7_04_v3-978955-982284-rev__Pf3D7_12_v3-1729545-1732872-for	3327	+	[ID=PF3D7_1240700;feature=gene;description=rifin, pseudogene;],[ID=PF3D7_1240800;feature=gene;description=Plasmodium+RNA+of+unknown+function+RUF6;]
Pf3D7_11_v3	6490	9810	Pf3D7_04_v3-5667-8979-for__Pf3D7_11_v3-6490-9810-for	3320	+
Pf3D7_14_v3	3273565	3276885	Pf3D7_10_v3-1636496-1639836-for__Pf3D7_14_v3-3273565-3276885-for	3320	+	[ID=PF3D7_1479600;feature=gene;description=rifin;],[ID=PF3D7_1479700;feature=gene;description=rifin;]
Pf3D7_10_v3	34886	38204	Pf3D7_01_v3-605376-608652-rev__Pf3D7_10_v3-34886-38204-for	3318	+	[ID=PF3D7_1000100;feature=gene;description=erythrocyte membrane protein 1, PfEMP1;],[ID=PF3D7_1000200;feature=gene;description=rifin;]
Pf3D7_08_v3	1462690	1466008	Pf3D7_04_v3-5667-9002-rev__Pf3D7_08_v3-1462690-1466008-for	3318	+
Pf3D7_03_v3	1054360	1057677	Pf3D7_03_v3-1054360-1057677-for__Pf3D7_06_v3-1405906-1409203-for	3317	+
Pf3D7_08_v3	1462680	1465995	Pf3D7_02_v3-6997-10307-rev__Pf3D7_08_v3-1462680-1465995-for	3315	+
Pf3D7_03_v3	56520	59832	Pf3D7_02_v3-58357-61583-for__Pf3D7_03_v3-56520-59832-for	3312	+	[ID=PF3D7_0300600;feature=gene;description=Plasmodium exported protein, unknown function, fragment;],[ID=PF3D7_0300500;feature=gene;description=rifin;]
Pf3D7_02_v3	910845	914157	Pf3D7_02_v3-910845-914157-for__Pf3D7_04_v3-1167633-1170884-for	3312	+	[ID=PF3D7_0223400;feature=gene;description=rifin;],[ID=PF3D7_0223300;feature=gene;description="erythrocyte membrane protein 1 (PfEMP1), exon 2";]
Pf3D7_03_v3	1054407	1057719	Pf3D7_03_v3-1054407-1057719-rev__Pf3D7_04_v3-5667-8979-for	3312	-
Pf3D7_04_v3	5667	8979	Pf3D7_03_v3-1054407-1057719-rev__Pf3D7_04_v3-5667-8979-for	3312	+
Pf3D7_04_v3	5667	8979	Pf3D7_04_v3-5667-8979-for__Pf3D7_11_v3-6490-9810-for	3312	+
Pf3D7_05_v3	6022	9334	Pf3D7_04_v3-5686-8995-for__Pf3D7_05_v3-6022-9334-for	3312	+
Pf3D7_13_v3	6457	9769	Pf3D7_04_v3-5686-8995-for__Pf3D7_13_v3-6457-9769-for	3312	+
Pf3D7_05_v3	6016	9328	Pf3D7_05_v3-6016-9328-rev__Pf3D7_07_v3-1437457-1440738-for	3312	-
Pf3D7_13_v3	6451	9763	Pf3D7_07_v3-1437457-1440738-rev__Pf3D7_13_v3-6451-9763-for	3312	+
Pf3D7_02_v3	6997	10307	Pf3D7_02_v3-6997-10307-rev__Pf3D7_08_v3-1462680-1465995-for	3310	-
Pf3D7_04_v3	5686	8995	Pf3D7_04_v3-5686-8995-for__Pf3D7_05_v3-6022-9334-for	3309	+
Pf3D7_04_v3	5686	8995	Pf3D7_04_v3-5686-8995-for__Pf3D7_13_v3-6457-9769-for	3309	+
Pf3D7_04_v3	1149333	1152640	Pf3D7_04_v3-1149333-1152640-rev__Pf3D7_07_v3-31132-34439-for	3307	-	[ID=PF3D7_0425700;feature=gene;description=rifin;],[ID=PF3D7_0425600;feature=gene;description=rifin, pseudogene;]
Pf3D7_07_v3	31132	34439	Pf3D7_04_v3-1149333-1152640-rev__Pf3D7_07_v3-31132-34439-for	3307	+	[ID=PF3D7_0700300;feature=gene;description=rifin;],[ID=PF3D7_0700200;feature=gene;description=rifin;]
Pf3D7_10_v3	1678546	1681853	Pf3D7_05_v3-5332-8630-rev__Pf3D7_10_v3-1678546-1681853-for	3307	+
Pf3D7_11_v3	6503	9810	Pf3D7_05_v3-6016-9315-for__Pf3D7_11_v3-6503-9810-for	3307	+
Pf3D7_11_v3	6503	9810	Pf3D7_11_v3-6503-9810-for__Pf3D7_13_v3-6451-9750-for	3307	+
Pf3D7_10_v3	1636482	1639788	Pf3D7_10_v3-1636482-1639788-for__Pf3D7_10_v3-38782-42069-rev	3306	+	[ID=PF3D7_1041200;feature=gene;description=rifin;],[ID=PF3D7_1041100;feature=gene;description=rifin;]
Pf3D7_10_v3	1636482	1639788	Pf3D7_10_v3-1636482-1639788-rev__Pf3D7_10_v3-38782-42069-for	3306	-	[ID=PF3D7_1041200;feature=gene;description=rifin;],[ID=PF3D7_1041100;feature=gene;description=rifin;]
Pf3D7_04_v3	74263	77566	Pf3D7_02_v3-58344-61583-for__Pf3D7_04_v3-74263-77566-for	3303	+	[ID=PF3D7_0401100;feature=gene;description=Plasmodium exported protein, unknown function, fragment;],[ID=PF3D7_0401000;feature=gene;description=rifin;]
Pf3D7_07_v3	1405543	1408844	Pf3D7_02_v3-58357-61583-rev__Pf3D7_07_v3-1405543-1408844-for	3301	+	[ID=PF3D7_0732700;feature=gene;description=rifin;],[ID=PF3D7_0732600;feature=gene;description=Plasmodium exported protein, unknown function, fragment;]
Pf3D7_07_v3	70660	73959	Pf3D7_03_v3-1005315-1008590-rev__Pf3D7_07_v3-70660-73959-for	3299	+	[ID=PF3D7_0701600;feature=gene;description="Pfmc-2TM+Maurer's+cleft+two+transmembrane+protein";],[ID=PF3D7_0701700;feature=gene;description=exported+protein+family+1;]
Pf3D7_05_v3	6016	9315	Pf3D7_05_v3-6016-9315-for__Pf3D7_11_v3-6503-9810-for	3299	+
Pf3D7_13_v3	6451	9750	Pf3D7_11_v3-6503-9810-for__Pf3D7_13_v3-6451-9750-for	3299	+
Pf3D7_05_v3	5332	8630	Pf3D7_05_v3-5332-8630-rev__Pf3D7_10_v3-1678546-1681853-for	3298	-
Pf3D7_06_v3	1405906	1409203	Pf3D7_03_v3-1054360-1057677-for__Pf3D7_06_v3-1405906-1409203-for	3297	+
Pf3D7_10_v3	38782	42069	Pf3D7_10_v3-1636482-1639788-for__Pf3D7_10_v3-38782-42069-rev	3287	-	[ID=PF3D7_1000200;feature=gene;description=rifin;],[ID=PF3D7_1000300;feature=gene;description=rifin;]
Pf3D7_10_v3	38782	42069	Pf3D7_10_v3-1636482-1639788-rev__Pf3D7_10_v3-38782-42069-for	3287	+	[ID=PF3D7_1000200;feature=gene;description=rifin;],[ID=PF3D7_1000300;feature=gene;description=rifin;]
Pf3D7_07_v3	1437457	1440738	Pf3D7_05_v3-6016-9328-rev__Pf3D7_07_v3-1437457-1440738-for	3281	+
Pf3D7_07_v3	1437457	1440738	Pf3D7_07_v3-1437457-1440738-rev__Pf3D7_13_v3-6451-9763-for	3281	-
Pf3D7_11_v3	6510	9789	Pf3D7_07_v3-5815-9077-for__Pf3D7_11_v3-6510-9789-for	3279	+
Pf3D7_09_v3	4920	8198	Pf3D7_07_v3-5804-9074-for__Pf3D7_09_v3-4920-8198-for	3278	+
Pf3D7_01_v3	605376	608652	Pf3D7_01_v3-605376-608652-rev__Pf3D7_10_v3-34886-38204-for	3276	-	[ID=PF3D7_0115700;feature=gene;description=erythrocyte membrane protein 1, PfEMP1;],[ID=PF3D7_0115600;feature=gene;description=rifin;]
Pf3D7_03_v3	1005315	1008590	Pf3D7_03_v3-1005315-1008590-rev__Pf3D7_07_v3-70660-73959-for	3275	-	[ID=PF3D7_0324100;feature=gene;description="Pfmc-2TM+Maurer's+cleft+two+transmembrane+protein";],[ID=PF3D7_0324000;feature=gene;description=exported+protein+family+1;]
Pf3D7_06_v3	1368841	1372116	Pf3D7_06_v3-1368841-1372116-rev__Pf3D7_10_v3-38779-42038-for	3275	-	[ID=PF3D7_0632700;feature=gene;description=rifin;],[ID=PF3D7_0632600;feature=gene;description=rifin, pseudogene;]
Pf3D7_07_v3	5804	9074	Pf3D7_07_v3-5804-9074-for__Pf3D7_09_v3-4920-8198-for	3270	+
Pf3D7_04_v3	558520	561785	Pf3D7_04_v3-558520-561785-for__Pf3D7_07_v3-524197-527456-for	3265	+	[ID=PF3D7_0412600;feature=gene;description=rifin, pseudogene;],[ID=PF3D7_0412700;feature=gene;description=erythrocyte membrane protein 1, PfEMP1;]
Pf3D7_07_v3	5815	9077	Pf3D7_07_v3-5815-9077-for__Pf3D7_11_v3-6510-9789-for	3262	+
Pf3D7_07_v3	524197	527456	Pf3D7_04_v3-558520-561785-for__Pf3D7_07_v3-524197-527456-for	3259	+	[ID=PF3D7_0711900;feature=gene;description=rifin, pseudogene;],[ID=PF3D7_0712000;feature=gene;description=erythrocyte membrane protein 1, PfEMP1;]
Pf3D7_10_v3	38779	42038	Pf3D7_06_v3-1368841-1372116-rev__Pf3D7_10_v3-38779-42038-for	3259	+	[ID=PF3D7_1000200;feature=gene;description=rifin;],[ID=PF3D7_1000300;feature=gene;description=rifin;]
Pf3D7_04_v3	1191917	1195171	Pf3D7_04_v3-1191917-1195171-for__Pf3D7_09_v3-1531919-1535151-for	3254	+
Pf3D7_04_v3	1167633	1170884	Pf3D7_02_v3-910845-914157-for__Pf3D7_04_v3-1167633-1170884-for	3251	+	[ID=PF3D7_0425900;feature=gene;description=rifin;],[ID=PF3D7_0425800;feature=gene;description=erythrocyte membrane protein 1, PfEMP1;]
Pf3D7_05_v3	6022	9267	Pf3D7_01_v3-6114-9349-for__Pf3D7_05_v3-6022-9267-for	3245	+
Pf3D7_13_v3	6457	9702	Pf3D7_01_v3-6114-9349-for__Pf3D7_13_v3-6457-9702-for	3245	+
Pf3D7_03_v3	1054433	1057677	Pf3D7_03_v3-1054433-1057677-rev__Pf3D7_07_v3-5838-9074-for	3244	-
Pf3D7_02_v3	914344	917587	Pf3D7_02_v3-914344-917587-for__Pf3D7_10_v3-1640405-1643642-for	3243	+	[ID=PF3D7_0223400;feature=gene;description=rifin;],[ID=PF3D7_0223500;feature=gene;description=erythrocyte membrane protein 1, PfEMP1;]
Pf3D7_09_v3	1537710	1540952	Pf3D7_09_v3-1537710-1540952-for__Pf3D7_10_v3-1683560-1686729-for	3242	+
Pf3D7_02_v3	58344	61583	Pf3D7_02_v3-58344-61583-for__Pf3D7_04_v3-74263-77566-for	3239	+	[ID=PF3D7_0201100;feature=gene;description=Plasmodium exported protein, unknown function, fragment;],[ID=PF3D7_0201000;feature=gene;description=rifin;]
Pf3D7_10_v3	1640405	1643642	Pf3D7_02_v3-914344-917587-for__Pf3D7_10_v3-1640405-1643642-for	3237	+	[ID=PF3D7_1041300;feature=gene;description=erythrocyte membrane protein 1, PfEMP1;],[ID=PF3D7_1041200;feature=gene;description=rifin;]
Pf3D7_06_v3	1405966	1409203	Pf3D7_06_v3-1405966-1409203-for__Pf3D7_09_v3-1531940-1535151-for	3237	+
Pf3D7_07_v3	5838	9074	Pf3D7_03_v3-1054433-1057677-rev__Pf3D7_07_v3-5838-9074-for	3236	+
Pf3D7_01_v3	6114	9349	Pf3D7_01_v3-6114-9349-for__Pf3D7_05_v3-6022-9267-for	3235	+
Pf3D7_01_v3	6114	9349	Pf3D7_01_v3-6114-9349-for__Pf3D7_13_v3-6457-9702-for	3235	+
Pf3D7_07_v3	35020	38255	Pf3D7_07_v3-35020-38255-rev__Pf3D7_14_v3-3269178-3272368-for	3235	-	[ID=PF3D7_0700400;feature=gene;description=stevor;]
Pf3D7_04_v3	1149407	1152640	Pf3D7_04_v3-1149407-1152640-rev__Pf3D7_11_v3-49170-52403-for	3233	-	[ID=PF3D7_0425700;feature=gene;description=rifin;],[ID=PF3D7_0425600;feature=gene;description=rifin, pseudogene;]
Pf3D7_11_v3	49170	52403	Pf3D7_04_v3-1149407-1152640-rev__Pf3D7_11_v3-49170-52403-for	3233	+	[ID=PF3D7_1100400;feature=gene;description=rifin;],[ID=PF3D7_1100500;feature=gene;description=rifin;]
Pf3D7_01_v3	6095	9327	Pf3D7_01_v3-6095-9327-for__Pf3D7_03_v3-8702-11916-for	3232	+
Pf3D7_09_v3	1531919	1535151	Pf3D7_04_v3-1191917-1195171-for__Pf3D7_09_v3-1531919-1535151-for	3232	+
Pf3D7_02_v3	58357	61583	Pf3D7_02_v3-58357-61583-for__Pf3D7_03_v3-56520-59832-for	3226	+	[ID=PF3D7_0201100;feature=gene;description=Plasmodium exported protein, unknown function, fragment;],[ID=PF3D7_0201000;feature=gene;description=rifin;]
Pf3D7_02_v3	58357	61583	Pf3D7_02_v3-58357-61583-rev__Pf3D7_07_v3-1405543-1408844-for	3226	-	[ID=PF3D7_0201100;feature=gene;description=Plasmodium exported protein, unknown function, fragment;],[ID=PF3D7_0201000;feature=gene;description=rifin;]
Pf3D7_01_v3	84110	87329	Pf3D7_01_v3-84110-87329-for__Pf3D7_13_v3-59439-62641-for	3219	+	[ID=PF3D7_0101800;feature=gene;description=stevor;],[ID=PF3D7_0101700;feature=gene;description="erythrocyte membrane protein 1 (PfEMP1), exon 2, pseudogene";]
Pf3D7_03_v3	8702	11916	Pf3D7_01_v3-6095-9327-for__Pf3D7_03_v3-8702-11916-for	3214	+
Pf3D7_09_v3	1531940	1535151	Pf3D7_06_v3-1405966-1409203-for__Pf3D7_09_v3-1531940-1535151-for	3211	+
Pf3D7_04_v3	1192008	1195213	Pf3D7_04_v3-1192008-1195213-for__Pf3D7_13_v3-2912241-2915433-for	3205	+
Pf3D7_13_v3	59439	62641	Pf3D7_01_v3-84110-87329-for__Pf3D7_13_v3-59439-62641-for	3202	+	[ID=PF3D7_1300900;feature=gene;description=stevor;],[ID=PF3D7_1300800;feature=gene;description="erythrocyte membrane protein 1 (PfEMP1), pseudogene";]
Pf3D7_01_v3	6095	9289	Pf3D7_01_v3-6095-9289-rev__Pf3D7_13_v3-2912241-2915433-for	3194	-
Pf3D7_13_v3	2912241	2915433	Pf3D7_01_v3-6095-9289-rev__Pf3D7_13_v3-2912241-2915433-for	3192	+
Pf3D7_13_v3	2912241	2915433	Pf3D7_04_v3-1192008-1195213-for__Pf3D7_13_v3-2912241-2915433-for	3192	+
Pf3D7_14_v3	3269178	3272368	Pf3D7_07_v3-35020-38255-rev__Pf3D7_14_v3-3269178-3272368-for	3190	+	[ID=PF3D7_1479500;feature=gene;description=stevor;]
Pf3D7_01_v3	39902	43089	Pf3D7_01_v3-39902-43089-rev__Pf3D7_04_v3-1167119-1170284-for	3187	-	[ID=PF3D7_0100200;feature=gene;description=rifin;],[ID=PF3D7_0100300;feature=gene;description=erythrocyte membrane protein 1, PfEMP1;]
Pf3D7_04_v3	1192009	1195194	Pf3D7_04_v3-1192009-1195194-rev__Pf3D7_12_v3-5830-9014-for	3185	-
Pf3D7_12_v3	5830	9014	Pf3D7_04_v3-1192009-1195194-rev__Pf3D7_12_v3-5830-9014-for	3184	+
Pf3D7_07_v3	5804	8988	Pf3D7_07_v3-5804-8988-rev__Pf3D7_13_v3-2912241-2915425-for	3184	-
Pf3D7_13_v3	2912241	2915425	Pf3D7_07_v3-5804-8988-rev__Pf3D7_13_v3-2912241-2915425-for	3184	+
Pf3D7_12_v3	5830	9014	Pf3D7_07_v3-5815-8987-for__Pf3D7_12_v3-5830-9014-for	3184	+
Pf3D7_10_v3	1683559	1686743	Pf3D7_10_v3-1683559-1686743-rev__Pf3D7_11_v3-820-3979-for	3184	-
Pf3D7_09_v3	30510	33684	Pf3D7_09_v3-30510-33684-for__Pf3D7_10_v3-38757-41904-for	3174	+	[ID=PF3D7_0900300;feature=gene;description=rifin;],[ID=PF3D7_0900200;feature=gene;description=rifin;]
Pf3D7_07_v3	5815	8987	Pf3D7_07_v3-5815-8987-for__Pf3D7_12_v3-5830-9014-for	3172	+
Pf3D7_02_v3	910845	914015	Pf3D7_01_v3-39432-42575-rev__Pf3D7_02_v3-910845-914015-for	3170	+	[ID=PF3D7_0223400;feature=gene;description=rifin;],[ID=PF3D7_0223300;feature=gene;description="erythrocyte membrane protein 1 (PfEMP1), exon 2";]
Pf3D7_10_v3	1683560	1686729	Pf3D7_09_v3-1537710-1540952-for__Pf3D7_10_v3-1683560-1686729-for	3169	+
Pf3D7_04_v3	1167119	1170284	Pf3D7_01_v3-39902-43089-rev__Pf3D7_04_v3-1167119-1170284-for	3165	+	[ID=PF3D7_0425900;feature=gene;description=rifin;],[ID=PF3D7_0425800;feature=gene;description=erythrocyte membrane protein 1, PfEMP1;]
Pf3D7_12_v3	5853	9014	Pf3D7_03_v3-1054517-1057677-rev__Pf3D7_12_v3-5853-9014-for	3161	+
Pf3D7_03_v3	1054517	1057677	Pf3D7_03_v3-1054517-1057677-rev__Pf3D7_12_v3-5853-9014-for	3160	-
Pf3D7_01_v3	355	3514	Pf3D7_01_v3-355-3514-rev__Pf3D7_10_v3-1683627-1686769-for	3159	-
Pf3D7_11_v3	2022471	2025630	Pf3D7_04_v3-1153073-1156228-for__Pf3D7_11_v3-2022471-2025630-for	3159	+	[ID=PF3D7_1150300;feature=gene;description=rifin;]
Pf3D7_11_v3	820	3979	Pf3D7_10_v3-1683559-1686743-rev__Pf3D7_11_v3-820-3979-for	3159	+
Pf3D7_04_v3	1153073	1156228	Pf3D7_04_v3-1153073-1156228-for__Pf3D7_11_v3-2022471-2025630-for	3155	+	[ID=PF3D7_0425700;feature=gene;description=rifin;]
Pf3D7_09_v3	30535	33690	Pf3D7_09_v3-30535-33690-rev__Pf3D7_10_v3-1636641-1639788-for	3155	-	[ID=PF3D7_0900300;feature=gene;description=rifin;],[ID=PF3D7_0900200;feature=gene;description=rifin;]
Pf3D7_10_v3	38757	41904	Pf3D7_09_v3-30510-33684-for__Pf3D7_10_v3-38757-41904-for	3147	+	[ID=PF3D7_1000200;feature=gene;description=rifin;],[ID=PF3D7_1000300;feature=gene;description=rifin;]
Pf3D7_10_v3	1636641	1639788	Pf3D7_09_v3-30535-33690-rev__Pf3D7_10_v3-1636641-1639788-for	3147	+	[ID=PF3D7_1041200;feature=gene;description=rifin;],[ID=PF3D7_1041100;feature=gene;description=rifin;]
Pf3D7_01_v3	39432	42575	Pf3D7_01_v3-39432-42575-rev__Pf3D7_02_v3-910845-914015-for	3143	-	[ID=PF3D7_0100200;feature=gene;description=rifin;],[ID=PF3D7_0100300;feature=gene;description=erythrocyte membrane protein 1, PfEMP1;]
Pf3D7_10_v3	1683627	1686769	Pf3D7_01_v3-355-3514-rev__Pf3D7_10_v3-1683627-1686769-for	3142	+
Pf3D7_09_v3	1537324	1540456	Pf3D7_09_v3-1537324-1540456-for__Pf3D7_13_v3-2917501-2920577-for	3132	+
Pf3D7_07_v3	1405465	1408596	Pf3D7_07_v3-1405465-1408596-rev__Pf3D7_09_v3-34936-38041-for	3131	-	[ID=PF3D7_0732600;feature=gene;description=Plasmodium exported protein, unknown function, fragment;]
Pf3D7_04_v3	74053	77180	Pf3D7_01_v3-54710-57821-for__Pf3D7_04_v3-74053-77180-for	3127	+	[ID=PF3D7_0401100;feature=gene;description=Plasmodium exported protein, unknown function, fragment;],[ID=PF3D7_0401000;feature=gene;description=rifin;]
Pf3D7_01_v3	39975	43089	Pf3D7_01_v3-39975-43089-rev__Pf3D7_08_v3-1429815-1432911-for	3114	-	[ID=PF3D7_0100200;feature=gene;description=rifin;],[ID=PF3D7_0100300;feature=gene;description=erythrocyte membrane protein 1, PfEMP1;]
Pf3D7_10_v3	2149	5261	Pf3D7_07_v3-2689-5782-for__Pf3D7_10_v3-2149-5261-for	3112	+
Pf3D7_01_v3	54710	57821	Pf3D7_01_v3-54710-57821-for__Pf3D7_04_v3-74053-77180-for	3111	+	[ID=PF3D7_0100600;feature=gene;description=rifin;],[ID=PF3D7_0100700;feature=gene;description=Plasmodium exported protein, unknown function, fragment;]
Pf3D7_09_v3	34936	38041	Pf3D7_07_v3-1405465-1408596-rev__Pf3D7_09_v3-34936-38041-for	3105	+
Pf3D7_06_v3	15678	18779	Pf3D7_04_v3-42648-45742-for__Pf3D7_06_v3-15678-18779-for	3101	+	[ID=PF3D7_0600300;feature=gene;description=rifin;],[ID=PF3D7_0600400;feature=gene;description=erythrocyte membrane protein 1, PfEMP1;]
Pf3D7_08_v3	1429815	1432911	Pf3D7_01_v3-39975-43089-rev__Pf3D7_08_v3-1429815-1432911-for	3096	+	[ID=PF3D7_0833400;feature=gene;description=rifin;],[ID=PF3D7_0833300;feature=gene;description="erythrocyte membrane protein 1 (PfEMP1), exon 2, pseudogene";]
Pf3D7_05_v3	2202	5297	Pf3D7_05_v3-2202-5297-for__Pf3D7_07_v3-2689-5780-for	3095	+
Pf3D7_13_v3	2637	5732	Pf3D7_07_v3-2689-5780-for__Pf3D7_13_v3-2637-5732-for	3095	+
Pf3D7_04_v3	42648	45742	Pf3D7_04_v3-42648-45742-for__Pf3D7_06_v3-15678-18779-for	3094	+	[ID=PF3D7_0400400;feature=gene;description=erythrocyte membrane protein 1, PfEMP1;],[ID=PF3D7_0400300;feature=gene;description=rifin;]
Pf3D7_02_v3	33575	36668	Pf3D7_02_v3-33575-36668-for__Pf3D7_09_v3-50298-53390-for	3093	+	[ID=PF3D7_0200200;feature=gene;description=rifin;],[ID=PF3D7_0200300;feature=gene;description="erythrocyte membrane protein 1 (PfEMP1), exon 2";]
Pf3D7_07_v3	2689	5782	Pf3D7_07_v3-2689-5782-for__Pf3D7_10_v3-2149-5261-for	3093	+
Pf3D7_09_v3	50298	53390	Pf3D7_02_v3-33575-36668-for__Pf3D7_09_v3-50298-53390-for	3092	+	[ID=PF3D7_0900700;feature=gene;description=rifin;],[ID=PF3D7_0900800;feature=gene;description="erythrocyte membrane protein 1 (PfEMP1), exon 2, pseudogene";]
Pf3D7_07_v3	2689	5780	Pf3D7_05_v3-2202-5297-for__Pf3D7_07_v3-2689-5780-for	3091	+
Pf3D7_07_v3	2689	5780	Pf3D7_07_v3-2689-5780-for__Pf3D7_13_v3-2637-5732-for	3091	+
Pf3D7_04_v3	1153346	1156429	Pf3D7_04_v3-1153346-1156429-for__Pf3D7_04_v3-56853-59922-rev	3083	+	[ID=PF3D7_0425700;feature=gene;description=rifin;],[ID=PF3D7_0425800;feature=gene;description=erythrocyte membrane protein 1, PfEMP1;]
Pf3D7_04_v3	1153346	1156429	Pf3D7_04_v3-1153346-1156429-rev__Pf3D7_04_v3-56853-59922-for	3083	-	[ID=PF3D7_0425700;feature=gene;description=rifin;],[ID=PF3D7_0425800;feature=gene;description=erythrocyte membrane protein 1, PfEMP1;]
Pf3D7_13_v3	2917501	2920577	Pf3D7_09_v3-1537324-1540456-for__Pf3D7_13_v3-2917501-2920577-for	3076	+
Pf3D7_06_v3	15724	18794	Pf3D7_01_v3-39512-42575-for__Pf3D7_06_v3-15724-18794-for	3070	+	[ID=PF3D7_0600300;feature=gene;description=rifin;],[ID=PF3D7_0600400;feature=gene;description=erythrocyte membrane protein 1, PfEMP1;]
Pf3D7_04_v3	56853	59922	Pf3D7_04_v3-1153346-1156429-for__Pf3D7_04_v3-56853-59922-rev	3069	-	[ID=PF3D7_0400400;feature=gene;description=erythrocyte membrane protein 1, PfEMP1;],[ID=PF3D7_0400500;feature=gene;description=rifin;]
Pf3D7_04_v3	56853	59922	Pf3D7_04_v3-1153346-1156429-rev__Pf3D7_04_v3-56853-59922-for	3069	+	[ID=PF3D7_0400400;feature=gene;description=erythrocyte membrane protein 1, PfEMP1;],[ID=PF3D7_0400500;feature=gene;description=rifin;]
Pf3D7_06_v3	15725	18794	Pf3D7_04_v3-1167633-1170661-rev__Pf3D7_06_v3-15725-18794-for	3069	+	[ID=PF3D7_0600300;feature=gene;description=rifin;],[ID=PF3D7_0600400;feature=gene;description=erythrocyte membrane protein 1, PfEMP1;]
Pf3D7_01_v3	39512	42575	Pf3D7_01_v3-39512-42575-for__Pf3D7_06_v3-15724-18794-for	3063	+	[ID=PF3D7_0100200;feature=gene;description=rifin;],[ID=PF3D7_0100300;feature=gene;description=erythrocyte membrane protein 1, PfEMP1;]
Pf3D7_12_v3	2267947	2271010	Pf3D7_03_v3-3598-6609-rev__Pf3D7_12_v3-2267947-2271010-for	3063	+
Pf3D7_04_v3	1191972	1195031	Pf3D7_04_v3-1191972-1195031-for__Pf3D7_06_v3-1406017-1409063-for	3059	+
Pf3D7_02_v3	941832	944889	Pf3D7_02_v3-941832-944889-rev__Pf3D7_07_v3-2689-5744-for	3057	-
Pf3D7_07_v3	2689	5744	Pf3D7_02_v3-941832-944889-rev__Pf3D7_07_v3-2689-5744-for	3055	+
Pf3D7_08_v3	952	4006	Pf3D7_03_v3-3598-6609-for__Pf3D7_08_v3-952-4006-for	3054	+
Pf3D7_03_v3	8559	11610	Pf3D7_03_v3-8559-11610-rev__Pf3D7_08_v3-1463108-1466150-for	3051	-
Pf3D7_06_v3	1406619	1409668	Pf3D7_06_v3-1406619-1409668-for__Pf3D7_12_v3-2263313-2266362-for	3049	+
Pf3D7_12_v3	2263313	2266362	Pf3D7_06_v3-1406619-1409668-for__Pf3D7_12_v3-2263313-2266362-for	3049	+
Pf3D7_06_v3	1406017	1409063	Pf3D7_04_v3-1191972-1195031-for__Pf3D7_06_v3-1406017-1409063-for	3046	+
Pf3D7_03_v3	58190	61233	Pf3D7_03_v3-58190-61233-rev__Pf3D7_13_v3-2873305-2876319-for	3043	-	[ID=PF3D7_0300600;feature=gene;description=Plasmodium exported protein, unknown function, fragment;]
Pf3D7_08_v3	1463108	1466150	Pf3D7_03_v3-8559-11610-rev__Pf3D7_08_v3-1463108-1466150-for	3042	+
Pf3D7_13_v3	2866499	2869540	Pf3D7_02_v3-49529-52568-rev__Pf3D7_13_v3-2866499-2869540-for	3041	+	[ID=PF3D7_1372900;feature=gene;description="erythrocyte membrane protein 1 (PfEMP1), exon 2, pseudogene";],[ID=PF3D7_1373000;feature=gene;description=rifin;]
Pf3D7_02_v3	914337	917377	Pf3D7_01_v3-36097-39101-rev__Pf3D7_02_v3-914337-917377-for	3040	+	[ID=PF3D7_0223400;feature=gene;description=rifin;],[ID=PF3D7_0223500;feature=gene;description=erythrocyte membrane protein 1, PfEMP1;]
Pf3D7_02_v3	49529	52568	Pf3D7_02_v3-49529-52568-rev__Pf3D7_13_v3-2866499-2869540-for	3039	-	[ID=PF3D7_0200700;feature=gene;description=rifin;],[ID=PF3D7_0200800;feature=gene;description="erythrocyte membrane protein 1 (PfEMP1), exon 2, pseudogene";]
Pf3D7_10_v3	1640398	1643432	Pf3D7_01_v3-36097-39101-rev__Pf3D7_10_v3-1640398-1643432-for	3034	+	[ID=PF3D7_1041300;feature=gene;description=erythrocyte membrane protein 1, PfEMP1;],[ID=PF3D7_1041200;feature=gene;description=rifin;]
Pf3D7_09_v3	46705	49735	Pf3D7_08_v3-53449-56475-for__Pf3D7_09_v3-46705-49735-for	3030	+	[ID=PF3D7_0900700;feature=gene;description=rifin;],[ID=PF3D7_0900600;feature=gene;description=rifin;]
Pf3D7_04_v3	1167633	1170661	Pf3D7_04_v3-1167633-1170661-rev__Pf3D7_06_v3-15725-18794-for	3028	-	[ID=PF3D7_0425900;feature=gene;description=rifin;],[ID=PF3D7_0425800;feature=gene;description=erythrocyte membrane protein 1, PfEMP1;]
Pf3D7_12_v3	2268450	2271478	Pf3D7_10_v3-1683560-1686574-for__Pf3D7_12_v3-2268450-2271478-for	3028	+
Pf3D7_08_v3	53449	56475	Pf3D7_08_v3-53449-56475-for__Pf3D7_09_v3-46705-49735-for	3026	+	[ID=PF3D7_0800500;feature=gene;description=rifin;],[ID=PF3D7_0800400;feature=gene;description=rifin;]
Pf3D7_10_v3	1640410	1643432	Pf3D7_10_v3-1640410-1643432-rev__Pf3D7_12_v3-40929-43907-for	3022	-	[ID=PF3D7_1041300;feature=gene;description=erythrocyte membrane protein 1, PfEMP1;],[ID=PF3D7_1041200;feature=gene;description=rifin;]
Pf3D7_03_v3	1059728	1062745	Pf3D7_03_v3-1059728-1062745-for__Pf3D7_03_v3-3635-6609-rev	3017	+
Pf3D7_03_v3	1059728	1062745	Pf3D7_03_v3-1059728-1062745-rev__Pf3D7_03_v3-3635-6609-for	3017	-
Pf3D7_11_v3	42643	45660	Pf3D7_04_v3-57241-60243-for__Pf3D7_11_v3-42643-45660-for	3017	+	[ID=PF3D7_1100300;feature=gene;description=rifin;]
Pf3D7_13_v3	2873305	2876319	Pf3D7_03_v3-58190-61233-rev__Pf3D7_13_v3-2873305-2876319-for	3014	+	[ID=PF3D7_1373200;feature=gene;description=Plasmodium exported protein, unknown function, fragment;]
Pf3D7_10_v3	1683560	1686574	Pf3D7_10_v3-1683560-1686574-for__Pf3D7_12_v3-2268450-2271478-for	3014	+
Pf3D7_03_v3	3598	6609	Pf3D7_03_v3-3598-6609-for__Pf3D7_08_v3-952-4006-for	3011	+
Pf3D7_03_v3	3598	6609	Pf3D7_03_v3-3598-6609-rev__Pf3D7_12_v3-2267947-2271010-for	3011	-
Pf3D7_12_v3	27279	30288	Pf3D7_10_v3-38996-41983-for__Pf3D7_12_v3-27279-30288-for	3009	+	[ID=PF3D7_1200300;feature=gene;description=rifin;],[ID=PF3D7_1200200;feature=gene;description=rifin;]
Pf3D7_01_v3	36097	39101	Pf3D7_01_v3-36097-39101-rev__Pf3D7_02_v3-914337-917377-for	3004	-	[ID=PF3D7_0100200;feature=gene;description=rifin;],[ID=PF3D7_0100100;feature=gene;description=erythrocyte membrane protein 1, PfEMP1;]
Pf3D7_01_v3	36097	39101	Pf3D7_01_v3-36097-39101-rev__Pf3D7_10_v3-1640398-1643432-for	3004	-	[ID=PF3D7_0100200;feature=gene;description=rifin;],[ID=PF3D7_0100100;feature=gene;description=erythrocyte membrane protein 1, PfEMP1;]
Pf3D7_10_v3	840	3843	Pf3D7_10_v3-840-3843-rev__Pf3D7_13_v3-2917477-2920452-for	3003	-
Pf3D7_04_v3	57241	60243	Pf3D7_04_v3-57241-60243-for__Pf3D7_11_v3-42643-45660-for	3002	+	[ID=PF3D7_0400500;feature=gene;description=rifin;]
Pf3D7_12_v3	27279	30280	Pf3D7_10_v3-1636575-1639574-rev__Pf3D7_12_v3-27279-30280-for	3001	+	[ID=PF3D7_1200300;feature=gene;description=rifin;],[ID=PF3D7_1200200;feature=gene;description=rifin;]
Pf3D7_10_v3	1636575	1639574	Pf3D7_10_v3-1636575-1639574-rev__Pf3D7_12_v3-27279-30280-for	2999	-	[ID=PF3D7_1041200;feature=gene;description=rifin;],[ID=PF3D7_1041100;feature=gene;description=rifin;]
Pf3D7_10_v3	1683829	1686821	Pf3D7_08_v3-255-3232-rev__Pf3D7_10_v3-1683829-1686821-for	2992	+
Pf3D7_05_v3	1001	3991	Pf3D7_03_v3-3662-6609-for__Pf3D7_05_v3-1001-3991-for	2990	+
Pf3D7_13_v3	1436	4426	Pf3D7_03_v3-3662-6609-for__Pf3D7_13_v3-1436-4426-for	2990	+
Pf3D7_03_v3	47274	50263	Pf3D7_03_v3-47274-50263-for__Pf3D7_04_v3-43069-46028-for	2989	+	[ID=PF3D7_0300300;feature=gene;description="erythrocyte membrane protein 1 (PfEMP1), exon 2, pseudogene";],[ID=PF3D7_0300200;feature=gene;description=rifin;]
Pf3D7_10_v3	3082	6070	Pf3D7_04_v3-1194419-1197386-rev__Pf3D7_10_v3-3082-6070-for	2988	+
Pf3D7_10_v3	38996	41983	Pf3D7_10_v3-38996-41983-for__Pf3D7_12_v3-27279-30288-for	2987	+	[ID=PF3D7_1000200;feature=gene;description=rifin;],[ID=PF3D7_1000300;feature=gene;description=rifin;]
Pf3D7_12_v3	2268066	2271053	Pf3D7_12_v3-2268066-2271053-for__Pf3D7_13_v3-2917501-2920451-for	2987	+
Pf3D7_07_v3	1412087	1415071	Pf3D7_01_v3-601848-604796-for__Pf3D7_07_v3-1412087-1415071-for	2984	+	[ID=PF3D7_0732800;feature=gene;description="erythrocyte membrane protein 1 (PfEMP1), exon 2";],[ID=PF3D7_0732900;feature=gene;description=rifin;]
Pf3D7_14_v3	8422	11403	Pf3D7_06_v3-1368671-1371618-rev__Pf3D7_14_v3-8422-11403-for	2981	+	[ID=PF3D7_1400200;feature=gene;description=rifin;],[ID=PF3D7_1400300;feature=gene;description=rifin;]
Pf3D7_08_v3	1469118	1472098	Pf3D7_08_v3-1469118-1472098-for__Pf3D7_09_v3-1537845-1540824-for	2980	+
Pf3D7_09_v3	1537845	1540824	Pf3D7_08_v3-1469118-1472098-for__Pf3D7_09_v3-1537845-1540824-for	2979	+
Pf3D7_12_v3	40929	43907	Pf3D7_10_v3-1640410-1643432-rev__Pf3D7_12_v3-40929-43907-for	2978	+	[ID=PF3D7_1200400;feature=gene;description=erythrocyte membrane protein 1, PfEMP1;],[ID=PF3D7_1200500;feature=gene;description=rifin;]
Pf3D7_08_v3	255	3232	Pf3D7_08_v3-255-3232-rev__Pf3D7_10_v3-1683829-1686821-for	2977	-
Pf3D7_13_v3	2917477	2920452	Pf3D7_10_v3-840-3843-rev__Pf3D7_13_v3-2917477-2920452-for	2975	+
Pf3D7_03_v3	3635	6609	Pf3D7_03_v3-1059728-1062745-for__Pf3D7_03_v3-3635-6609-rev	2974	-
Pf3D7_03_v3	3635	6609	Pf3D7_03_v3-1059728-1062745-rev__Pf3D7_03_v3-3635-6609-for	2974	+
Pf3D7_04_v3	1153263	1156237	Pf3D7_04_v3-1153263-1156237-rev__Pf3D7_11_v3-42457-45428-for	2974	-	[ID=PF3D7_0425700;feature=gene;description=rifin;]
Pf3D7_05_v3	3135	6108	Pf3D7_04_v3-1194419-1197386-rev__Pf3D7_05_v3-3135-6108-for	2973	+
Pf3D7_13_v3	3570	6543	Pf3D7_04_v3-1194419-1197386-rev__Pf3D7_13_v3-3570-6543-for	2973	+
Pf3D7_11_v3	42457	45428	Pf3D7_04_v3-1153263-1156237-rev__Pf3D7_11_v3-42457-45428-for	2971	+	[ID=PF3D7_1100300;feature=gene;description=rifin;]
Pf3D7_10_v3	35199	38169	Pf3D7_01_v3-36185-39101-for__Pf3D7_10_v3-35199-38169-for	2970	+	[ID=PF3D7_1000100;feature=gene;description=erythrocyte membrane protein 1, PfEMP1;],[ID=PF3D7_1000200;feature=gene;description=rifin;]
Pf3D7_13_v3	2866499	2869468	Pf3D7_01_v3-82560-85519-rev__Pf3D7_13_v3-2866499-2869468-for	2969	+	[ID=PF3D7_1372900;feature=gene;description="erythrocyte membrane protein 1 (PfEMP1), exon 2, pseudogene";],[ID=PF3D7_1373000;feature=gene;description=rifin;]
Pf3D7_12_v3	2947	5916	Pf3D7_04_v3-1194419-1197386-rev__Pf3D7_12_v3-2947-5916-for	2969	+
Pf3D7_01_v3	6426	9394	Pf3D7_01_v3-6426-9394-rev__Pf3D7_02_v3-937799-940759-for	2968	-
Pf3D7_02_v3	4121	7089	Pf3D7_02_v3-4121-7089-rev__Pf3D7_04_v3-1194419-1197386-for	2968	-
Pf3D7_04_v3	43061	46028	Pf3D7_01_v3-601512-604474-rev__Pf3D7_04_v3-43061-46028-for	2967	+	[ID=PF3D7_0400400;feature=gene;description=erythrocyte membrane protein 1, PfEMP1;],[ID=PF3D7_0400300;feature=gene;description=rifin;]
Pf3D7_04_v3	1194419	1197386	Pf3D7_02_v3-4121-7089-rev__Pf3D7_04_v3-1194419-1197386-for	2967	+
Pf3D7_04_v3	1194419	1197386	Pf3D7_04_v3-1194419-1197386-rev__Pf3D7_05_v3-3135-6108-for	2967	-
Pf3D7_04_v3	1194419	1197386	Pf3D7_04_v3-1194419-1197386-rev__Pf3D7_10_v3-3082-6070-for	2967	-
Pf3D7_04_v3	1194419	1197386	Pf3D7_04_v3-1194419-1197386-rev__Pf3D7_12_v3-2947-5916-for	2967	-
Pf3D7_04_v3	1194419	1197386	Pf3D7_04_v3-1194419-1197386-rev__Pf3D7_13_v3-3570-6543-for	2967	-
Pf3D7_06_v3	1368841	1371805	Pf3D7_06_v3-1368841-1371805-for__Pf3D7_10_v3-1636513-1639477-for	2964	+	[ID=PF3D7_0632700;feature=gene;description=rifin;],[ID=PF3D7_0632600;feature=gene;description=rifin, pseudogene;]
Pf3D7_10_v3	1636513	1639477	Pf3D7_06_v3-1368841-1371805-for__Pf3D7_10_v3-1636513-1639477-for	2964	+	[ID=PF3D7_1041200;feature=gene;description=rifin;],[ID=PF3D7_1041100;feature=gene;description=rifin;]
Pf3D7_02_v3	914326	917289	Pf3D7_02_v3-914326-917289-rev__Pf3D7_10_v3-35220-38180-for	2963	-	[ID=PF3D7_0223400;feature=gene;description=rifin;],[ID=PF3D7_0223500;feature=gene;description=erythrocyte membrane protein 1, PfEMP1;]
Pf3D7_13_v3	2866499	2869462	Pf3D7_07_v3-1388308-1391250-for__Pf3D7_13_v3-2866499-2869462-for	2963	+	[ID=PF3D7_1372900;feature=gene;description="erythrocyte membrane protein 1 (PfEMP1), exon 2, pseudogene";],[ID=PF3D7_1373000;feature=gene;description=rifin;]
Pf3D7_01_v3	601512	604474	Pf3D7_01_v3-601512-604474-rev__Pf3D7_04_v3-43061-46028-for	2962	-	[ID=PF3D7_0115500;feature=gene;description="erythrocyte membrane protein 1 (PfEMP1), pseudogene";],[ID=PF3D7_0115600;feature=gene;description=rifin;]
Pf3D7_06_v3	1368851	1371813	Pf3D7_06_v3-1368851-1371813-rev__Pf3D7_12_v3-27374-30333-for	2962	-	[ID=PF3D7_0632700;feature=gene;description=rifin;],[ID=PF3D7_0632600;feature=gene;description=rifin, pseudogene;]
Pf3D7_02_v3	937799	940759	Pf3D7_01_v3-6426-9394-rev__Pf3D7_02_v3-937799-940759-for	2960	+
Pf3D7_10_v3	35220	38180	Pf3D7_02_v3-914326-917289-rev__Pf3D7_10_v3-35220-38180-for	2960	+	[ID=PF3D7_1000100;feature=gene;description=erythrocyte membrane protein 1, PfEMP1;],[ID=PF3D7_1000200;feature=gene;description=rifin;]
Pf3D7_01_v3	82560	85519	Pf3D7_01_v3-82560-85519-rev__Pf3D7_13_v3-2866499-2869468-for	2959	-	[ID=PF3D7_0101700;feature=gene;description="erythrocyte membrane protein 1 (PfEMP1), exon 2, pseudogene";],[ID=PF3D7_0101600;feature=gene;description=rifin;]
Pf3D7_04_v3	43069	46028	Pf3D7_03_v3-47274-50263-for__Pf3D7_04_v3-43069-46028-for	2959	+	[ID=PF3D7_0400400;feature=gene;description=erythrocyte membrane protein 1, PfEMP1;],[ID=PF3D7_0400300;feature=gene;description=rifin;]
Pf3D7_07_v3	1385798	1388757	Pf3D7_03_v3-50153-53107-rev__Pf3D7_07_v3-1385798-1388757-for	2959	+	[ID=PF3D7_0732000;feature=gene;description=stevor;],[ID=PF3D7_0732100;feature=gene;description="erythrocyte membrane protein 1 (PfEMP1), pseudogene";]
Pf3D7_12_v3	27374	30333	Pf3D7_06_v3-1368851-1371813-rev__Pf3D7_12_v3-27374-30333-for	2959	+	[ID=PF3D7_1200300;feature=gene;description=rifin;],[ID=PF3D7_1200200;feature=gene;description=rifin;]
Pf3D7_01_v3	425	3381	Pf3D7_01_v3-425-3381-rev__Pf3D7_08_v3-1469183-1472098-for	2956	-
Pf3D7_07_v3	1405928	1408883	Pf3D7_07_v3-1405928-1408883-for__Pf3D7_08_v3-1424064-1426993-for	2955	+	[ID=PF3D7_0732700;feature=gene;description=rifin;],[ID=PF3D7_0732600;feature=gene;description=Plasmodium exported protein, unknown function, fragment;]
Pf3D7_03_v3	50153	53107	Pf3D7_03_v3-50153-53107-rev__Pf3D7_07_v3-1385798-1388757-for	2954	-	[ID=PF3D7_0300300;feature=gene;description="erythrocyte membrane protein 1 (PfEMP1), exon 2, pseudogene";],[ID=PF3D7_0300400;feature=gene;description=stevor;]
Pf3D7_03_v3	52569	55520	Pf3D7_03_v3-52569-55520-rev__Pf3D7_14_v3-3267246-3270197-for	2951	-	[ID=PF3D7_0300400;feature=gene;description=stevor;],[ID=PF3D7_0300500;feature=gene;description=rifin;]
Pf3D7_14_v3	3267246	3270197	Pf3D7_03_v3-52569-55520-rev__Pf3D7_14_v3-3267246-3270197-for	2951	+	[ID=PF3D7_1479500;feature=gene;description=stevor;],[ID=PF3D7_1479400;feature=gene;description=rifin;]
Pf3D7_13_v3	2917501	2920451	Pf3D7_12_v3-2268066-2271053-for__Pf3D7_13_v3-2917501-2920451-for	2950	+
Pf3D7_01_v3	601848	604796	Pf3D7_01_v3-601848-604796-for__Pf3D7_07_v3-1412087-1415071-for	2948	+	[ID=PF3D7_0115500;feature=gene;description="erythrocyte membrane protein 1 (PfEMP1), pseudogene";],[ID=PF3D7_0115600;feature=gene;description=rifin;]
Pf3D7_02_v3	914315	917263	Pf3D7_02_v3-914315-917263-for__Pf3D7_03_v3-1028786-1031727-for	2948	+	[ID=PF3D7_0223400;feature=gene;description=rifin;],[ID=PF3D7_0223500;feature=gene;description=erythrocyte membrane protein 1, PfEMP1;]
Pf3D7_03_v3	3662	6609	Pf3D7_03_v3-3662-6609-for__Pf3D7_05_v3-1001-3991-for	2947	+
Pf3D7_03_v3	3662	6609	Pf3D7_03_v3-3662-6609-for__Pf3D7_13_v3-1436-4426-for	2947	+
Pf3D7_06_v3	1368671	1371618	Pf3D7_06_v3-1368671-1371618-rev__Pf3D7_14_v3-8422-11403-for	2947	-	[ID=PF3D7_0632700;feature=gene;description=rifin;],[ID=PF3D7_0632600;feature=gene;description=rifin, pseudogene;]
Pf3D7_02_v3	910847	913791	Pf3D7_02_v3-910847-913791-rev__Pf3D7_03_v3-47040-49978-for	2944	-	[ID=PF3D7_0223400;feature=gene;description=rifin;],[ID=PF3D7_0223300;feature=gene;description="erythrocyte membrane protein 1 (PfEMP1), exon 2";]
Pf3D7_07_v3	1388308	1391250	Pf3D7_07_v3-1388308-1391250-for__Pf3D7_13_v3-2866499-2869462-for	2942	+	[ID=PF3D7_0732200;feature=gene;description=rifin;],[ID=PF3D7_0732100;feature=gene;description="erythrocyte membrane protein 1 (PfEMP1), pseudogene";]
Pf3D7_03_v3	1028786	1031727	Pf3D7_02_v3-914315-917263-for__Pf3D7_03_v3-1028786-1031727-for	2941	+	[ID=PF3D7_0324800;feature=gene;description=rifin;],[ID=PF3D7_0324900;feature=gene;description=erythrocyte membrane protein 1, PfEMP1;]
Pf3D7_04_v3	74239	77180	Pf3D7_04_v3-74239-77180-rev__Pf3D7_08_v3-1424065-1426991-for	2941	-	[ID=PF3D7_0401100;feature=gene;description=Plasmodium exported protein, unknown function, fragment;],[ID=PF3D7_0401000;feature=gene;description=rifin;]
Pf3D7_06_v3	1368826	1371767	Pf3D7_06_v3-1368826-1371767-for__Pf3D7_14_v3-3273567-3276492-for	2941	+	[ID=PF3D7_0632700;feature=gene;description=rifin;],[ID=PF3D7_0632600;feature=gene;description=rifin, pseudogene;]
Pf3D7_03_v3	47040	49978	Pf3D7_02_v3-910847-913791-rev__Pf3D7_03_v3-47040-49978-for	2938	+	[ID=PF3D7_0300300;feature=gene;description="erythrocyte membrane protein 1 (PfEMP1), exon 2, pseudogene";],[ID=PF3D7_0300200;feature=gene;description=rifin;]
Pf3D7_10_v3	1593730	1596668	Pf3D7_06_v3-1320550-1323475-for__Pf3D7_10_v3-1593730-1596668-for	2938	+	[ID=PF3D7_1039900;feature=gene;description=exported+protein+family+4;],[ID=PF3D7_1039800;feature=gene;description=exported+protein+family+3;]
Pf3D7_03_v3	47040	49973	Pf3D7_01_v3-39656-42569-for__Pf3D7_03_v3-47040-49973-for	2933	+	[ID=PF3D7_0300300;feature=gene;description="erythrocyte membrane protein 1 (PfEMP1), exon 2, pseudogene";],[ID=PF3D7_0300200;feature=gene;description=rifin;]
Pf3D7_03_v3	1028809	1031738	Pf3D7_03_v3-1028809-1031738-for__Pf3D7_10_v3-1640398-1643317-for	2929	+	[ID=PF3D7_0324800;feature=gene;description=rifin;],[ID=PF3D7_0324900;feature=gene;description=erythrocyte membrane protein 1, PfEMP1;]
Pf3D7_08_v3	1424064	1426993	Pf3D7_07_v3-1405928-1408883-for__Pf3D7_08_v3-1424064-1426993-for	2929	+	[ID=PF3D7_0833200;feature=gene;description=rifin;]
Pf3D7_10_v3	39128	42055	Pf3D7_10_v3-39128-42055-rev__Pf3D7_14_v3-3273565-3276492-for	2927	-	[ID=PF3D7_1000200;feature=gene;description=rifin;],[ID=PF3D7_1000300;feature=gene;description=rifin;]
Pf3D7_14_v3	3273565	3276492	Pf3D7_10_v3-39128-42055-rev__Pf3D7_14_v3-3273565-3276492-for	2927	+	[ID=PF3D7_1479600;feature=gene;description=rifin;],[ID=PF3D7_1479700;feature=gene;description=rifin;]
Pf3D7_08_v3	1424065	1426991	Pf3D7_04_v3-74239-77180-rev__Pf3D7_08_v3-1424065-1426991-for	2926	+	[ID=PF3D7_0833200;feature=gene;description=rifin;]
Pf3D7_12_v3	27420	30346	Pf3D7_12_v3-27420-30346-rev__Pf3D7_14_v3-3273579-3276492-for	2926	-	[ID=PF3D7_1200300;feature=gene;description=rifin;],[ID=PF3D7_1200200;feature=gene;description=rifin;]
Pf3D7_06_v3	1320550	1323475	Pf3D7_06_v3-1320550-1323475-for__Pf3D7_10_v3-1593730-1596668-for	2925	+	[ID=PF3D7_0631500;feature=gene;description=exported+protein+family+3;],[ID=PF3D7_0631600;feature=gene;description=exported+protein+family+4;]
Pf3D7_14_v3	3273567	3276492	Pf3D7_06_v3-1368826-1371767-for__Pf3D7_14_v3-3273567-3276492-for	2925	+	[ID=PF3D7_1479600;feature=gene;description=rifin;],[ID=PF3D7_1479700;feature=gene;description=rifin;]
Pf3D7_10_v3	1640422	1643344	Pf3D7_01_v3-605435-608339-for__Pf3D7_10_v3-1640422-1643344-for	2922	+	[ID=PF3D7_1041300;feature=gene;description=erythrocyte membrane protein 1, PfEMP1;],[ID=PF3D7_1041200;feature=gene;description=rifin;]
Pf3D7_08_v3	1469118	1472040	Pf3D7_03_v3-1060368-1063233-for__Pf3D7_08_v3-1469118-1472040-for	2922	+
Pf3D7_10_v3	1640398	1643317	Pf3D7_03_v3-1028809-1031738-for__Pf3D7_10_v3-1640398-1643317-for	2919	+	[ID=PF3D7_1041300;feature=gene;description=erythrocyte membrane protein 1, PfEMP1;],[ID=PF3D7_1041200;feature=gene;description=rifin;]
Pf3D7_01_v3	36185	39101	Pf3D7_01_v3-36185-39101-for__Pf3D7_10_v3-35199-38169-for	2916	+	[ID=PF3D7_0100200;feature=gene;description=rifin;],[ID=PF3D7_0100100;feature=gene;description=erythrocyte membrane protein 1, PfEMP1;]
Pf3D7_01_v3	365	3280	Pf3D7_01_v3-365-3280-for__Pf3D7_08_v3-317-3200-for	2915	+
Pf3D7_08_v3	1469183	1472098	Pf3D7_01_v3-425-3381-rev__Pf3D7_08_v3-1469183-1472098-for	2915	+
Pf3D7_01_v3	39656	42569	Pf3D7_01_v3-39656-42569-for__Pf3D7_03_v3-47040-49973-for	2913	+	[ID=PF3D7_0100200;feature=gene;description=rifin;],[ID=PF3D7_0100300;feature=gene;description=erythrocyte membrane protein 1, PfEMP1;]
Pf3D7_14_v3	3273579	3276492	Pf3D7_12_v3-27420-30346-rev__Pf3D7_14_v3-3273579-3276492-for	2913	+	[ID=PF3D7_1479600;feature=gene;description=rifin;],[ID=PF3D7_1479700;feature=gene;description=rifin;]
Pf3D7_03_v3	1060297	1063208	Pf3D7_03_v3-1060297-1063208-for__Pf3D7_10_v3-1683624-1686532-for	2911	+
Pf3D7_10_v3	1683624	1686532	Pf3D7_03_v3-1060297-1063208-for__Pf3D7_10_v3-1683624-1686532-for	2908	+
Pf3D7_03_v3	1064291	1067198	Pf3D7_03_v3-1064291-1067198-for__Pf3D7_13_v3-2922376-2925236-for	2907	+
Pf3D7_06_v3	59903	62808	Pf3D7_06_v3-1302506-1305409-for__Pf3D7_06_v3-59903-62808-rev	2905	-
Pf3D7_01_v3	605435	608339	Pf3D7_01_v3-605435-608339-for__Pf3D7_10_v3-1640422-1643344-for	2904	+	[ID=PF3D7_0115700;feature=gene;description=erythrocyte membrane protein 1, PfEMP1;],[ID=PF3D7_0115600;feature=gene;description=rifin;]
Pf3D7_08_v3	1469111	1472015	Pf3D7_08_v3-1469111-1472015-rev__Pf3D7_13_v3-960-3793-for	2904	-
Pf3D7_13_v3	950	3854	Pf3D7_10_v3-1683627-1686514-rev__Pf3D7_13_v3-950-3854-for	2904	+
Pf3D7_12_v3	2202430	2205333	Pf3D7_02_v3-897164-900037-for__Pf3D7_12_v3-2202430-2205333-for	2903	+	[ID=PF3D7_1254100;feature=gene;description=stevor;],[ID=PF3D7_1254000;feature=gene;description=rifin;]
Pf3D7_02_v3	943605	946508	Pf3D7_02_v3-943605-946508-for__Pf3D7_10_v3-1683560-1686420-for	2903	+
Pf3D7_06_v3	1302506	1305409	Pf3D7_06_v3-1302506-1305409-for__Pf3D7_06_v3-59903-62808-rev	2903	+
Pf3D7_08_v3	301	3200	Pf3D7_08_v3-301-3200-for__Pf3D7_11_v3-810-3677-for	2899	+
Pf3D7_04_v3	1196901	1199798	Pf3D7_02_v3-943605-946486-for__Pf3D7_04_v3-1196901-1199798-for	2897	+
Pf3D7_04_v3	1196901	1199798	Pf3D7_04_v3-1196901-1199798-for__Pf3D7_12_v3-2268450-2271344-for	2897	+
Pf3D7_12_v3	2268450	2271344	Pf3D7_04_v3-1196901-1199798-for__Pf3D7_12_v3-2268450-2271344-for	2894	+
Pf3D7_04_v3	1196901	1199792	Pf3D7_04_v3-1196901-1199792-for__Pf3D7_09_v3-1537710-1540545-for	2891	+
Pf3D7_10_v3	1683627	1686518	Pf3D7_10_v3-1683627-1686518-for__Pf3D7_13_v3-2917954-2920834-for	2891	+
Pf3D7_10_v3	1683627	1686514	Pf3D7_10_v3-1683627-1686514-rev__Pf3D7_13_v3-950-3854-for	2887	-
Pf3D7_12_v3	2209285	2212171	Pf3D7_04_v3-66944-69818-rev__Pf3D7_12_v3-2209285-2212171-for	2886	+	[ID=PF3D7_1254300;feature=gene;description=stevor;]
Pf3D7_08_v3	317	3200	Pf3D7_01_v3-365-3280-for__Pf3D7_08_v3-317-3200-for	2883	+
Pf3D7_02_v3	943605	946486	Pf3D7_02_v3-943605-946486-for__Pf3D7_04_v3-1196901-1199798-for	2881	+
Pf3D7_07_v3	1440776	1443656	Pf3D7_07_v3-1440776-1443656-rev__Pf3D7_10_v3-3082-5940-for	2880	-
Pf3D7_13_v3	2917954	2920834	Pf3D7_10_v3-1683627-1686518-for__Pf3D7_13_v3-2917954-2920834-for	2880	+
Pf3D7_13_v3	47946	50825	Pf3D7_11_v3-45410-48271-for__Pf3D7_13_v3-47946-50825-for	2879	+	[ID=PF3D7_1300400;feature=gene;description=rifin;],[ID=PF3D7_1300500;feature=gene;description=rifin;]
Pf3D7_04_v3	1196900	1199778	Pf3D7_03_v3-1060232-1063068-for__Pf3D7_04_v3-1196900-1199778-for	2878	+
Pf3D7_03_v3	47040	49918	Pf3D7_03_v3-47040-49918-rev__Pf3D7_04_v3-1167680-1170518-for	2878	-	[ID=PF3D7_0300300;feature=gene;description="erythrocyte membrane protein 1 (PfEMP1), exon 2, pseudogene";],[ID=PF3D7_0300200;feature=gene;description=rifin;]
Pf3D7_07_v3	55361	58239	Pf3D7_07_v3-55361-58239-for__Pf3D7_08_v3-52565-55437-for	2878	+	[ID=PF3D7_0701100;feature=gene;description=rifin;]
Pf3D7_01_v3	690	3565	Pf3D7_01_v3-690-3565-rev__Pf3D7_04_v3-1196917-1199792-for	2875	-
Pf3D7_04_v3	1196917	1199792	Pf3D7_01_v3-690-3565-rev__Pf3D7_04_v3-1196917-1199792-for	2875	+
Pf3D7_03_v3	1064936	1067810	Pf3D7_03_v3-1064936-1067810-for__Pf3D7_13_v3-2922376-2925236-for	2874	+
Pf3D7_04_v3	66944	69818	Pf3D7_04_v3-66944-69818-rev__Pf3D7_12_v3-2209285-2212171-for	2874	-	[ID=PF3D7_0400800;feature=gene;description=stevor;]
Pf3D7_02_v3	897164	900037	Pf3D7_02_v3-897164-900037-for__Pf3D7_12_v3-2202430-2205333-for	2873	+	[ID=PF3D7_0222800;feature=gene;description=stevor;],[ID=PF3D7_0222700;feature=gene;description=rifin;]
Pf3D7_08_v3	52565	55437	Pf3D7_07_v3-55361-58239-for__Pf3D7_08_v3-52565-55437-for	2872	+	[ID=PF3D7_0800400;feature=gene;description=rifin;]
Pf3D7_13_v3	1436	4307	Pf3D7_13_v3-1436-4307-for__Pf3D7_13_v3-2917501-2920344-rev	2871	+
Pf3D7_11_v3	810	3677	Pf3D7_08_v3-301-3200-for__Pf3D7_11_v3-810-3677-for	2867	+
Pf3D7_03_v3	1060368	1063233	Pf3D7_03_v3-1060368-1063233-for__Pf3D7_08_v3-1469118-1472040-for	2865	+
Pf3D7_11_v3	45410	48271	Pf3D7_11_v3-45410-48271-for__Pf3D7_13_v3-47946-50825-for	2861	+	[ID=PF3D7_1100300;feature=gene;description=rifin;],[ID=PF3D7_1100400;feature=gene;description=rifin;]
Pf3D7_10_v3	1683560	1686420	Pf3D7_02_v3-943605-946508-for__Pf3D7_10_v3-1683560-1686420-for	2860	+
Pf3D7_13_v3	2922376	2925236	Pf3D7_03_v3-1064291-1067198-for__Pf3D7_13_v3-2922376-2925236-for	2860	+
Pf3D7_13_v3	2922376	2925236	Pf3D7_03_v3-1064936-1067810-for__Pf3D7_13_v3-2922376-2925236-for	2860	+
Pf3D7_03_v3	742	3600	Pf3D7_03_v3-742-3600-rev__Pf3D7_13_v3-2922421-2925236-for	2858	-
Pf3D7_10_v3	3082	5940	Pf3D7_07_v3-1440776-1443656-rev__Pf3D7_10_v3-3082-5940-for	2858	+
Pf3D7_10_v3	3082	5940	Pf3D7_10_v3-1681207-1684045-for__Pf3D7_10_v3-3082-5940-rev	2858	-
Pf3D7_04_v3	39287	42142	Pf3D7_01_v3-36259-39092-for__Pf3D7_04_v3-39287-42142-for	2855	+	[ID=PF3D7_0400200;feature=gene;description="erythrocyte membrane protein 1 (PfEMP1), exon 2, pseudogene";],[ID=PF3D7_0400300;feature=gene;description=rifin;]
Pf3D7_04_v3	4976	7822	Pf3D7_02_v3-938943-941780-rev__Pf3D7_04_v3-4976-7822-for	2846	+
Pf3D7_09_v3	30844	33690	Pf3D7_06_v3-1368969-1371813-rev__Pf3D7_09_v3-30844-33690-for	2846	+	[ID=PF3D7_0900300;feature=gene;description=rifin;],[ID=PF3D7_0900200;feature=gene;description=rifin;]
Pf3D7_03_v3	1057739	1060584	Pf3D7_03_v3-1057739-1060584-for__Pf3D7_04_v3-1194545-1197386-for	2845	+
Pf3D7_09_v3	1535218	1538063	Pf3D7_04_v3-1194549-1197388-for__Pf3D7_09_v3-1535218-1538063-for	2845	+
Pf3D7_10_v3	3095	5940	Pf3D7_06_v3-1411338-1414165-rev__Pf3D7_10_v3-3095-5940-for	2845	+
Pf3D7_06_v3	1368969	1371813	Pf3D7_06_v3-1368969-1371813-rev__Pf3D7_09_v3-30844-33690-for	2844	-	[ID=PF3D7_0632700;feature=gene;description=rifin;],[ID=PF3D7_0632600;feature=gene;description=rifin, pseudogene;]
Pf3D7_13_v3	2917501	2920344	Pf3D7_12_v3-846-3684-rev__Pf3D7_13_v3-2917501-2920344-for	2843	+
Pf3D7_13_v3	2917501	2920344	Pf3D7_13_v3-1436-4307-for__Pf3D7_13_v3-2917501-2920344-rev	2843	-
Pf3D7_12_v3	2265959	2268801	Pf3D7_04_v3-1194545-1197386-for__Pf3D7_12_v3-2265959-2268801-for	2842	+
Pf3D7_04_v3	1194545	1197386	Pf3D7_03_v3-1057739-1060584-for__Pf3D7_04_v3-1194545-1197386-for	2841	+
Pf3D7_04_v3	1194545	1197386	Pf3D7_04_v3-1194545-1197386-for__Pf3D7_12_v3-2265959-2268801-for	2841	+
Pf3D7_06_v3	1411338	1414178	Pf3D7_02_v3-4121-6959-rev__Pf3D7_06_v3-1411338-1414178-for	2840	+
Pf3D7_06_v3	1411338	1414178	Pf3D7_06_v3-1411338-1414178-rev__Pf3D7_07_v3-3622-6460-for	2840	-
Pf3D7_04_v3	1194549	1197388	Pf3D7_04_v3-1194549-1197388-for__Pf3D7_09_v3-1535218-1538063-for	2839	+
Pf3D7_09_v3	2048	4887	Pf3D7_07_v3-3622-6460-for__Pf3D7_09_v3-2048-4887-for	2839	+
Pf3D7_02_v3	4121	6959	Pf3D7_02_v3-4121-6959-rev__Pf3D7_06_v3-1411338-1414178-for	2838	-
Pf3D7_04_v3	1167680	1170518	Pf3D7_03_v3-47040-49918-rev__Pf3D7_04_v3-1167680-1170518-for	2838	+	[ID=PF3D7_0425900;feature=gene;description=rifin;],[ID=PF3D7_0425800;feature=gene;description=erythrocyte membrane protein 1, PfEMP1;]
Pf3D7_05_v3	1034	3872	Pf3D7_05_v3-1034-3872-rev__Pf3D7_13_v3-2917501-2920311-for	2838	-
Pf3D7_07_v3	3622	6460	Pf3D7_06_v3-1411338-1414178-rev__Pf3D7_07_v3-3622-6460-for	2838	+
Pf3D7_07_v3	3622	6460	Pf3D7_07_v3-3622-6460-for__Pf3D7_09_v3-2048-4887-for	2838	+
Pf3D7_07_v3	3622	6460	Pf3D7_07_v3-3622-6460-rev__Pf3D7_10_v3-1681207-1684045-for	2838	-
Pf3D7_10_v3	1681207	1684045	Pf3D7_07_v3-3622-6460-rev__Pf3D7_10_v3-1681207-1684045-for	2838	+
Pf3D7_08_v3	1049	3887	Pf3D7_08_v3-1049-3887-rev__Pf3D7_13_v3-2917501-2920311-for	2838	-
Pf3D7_10_v3	1681207	1684045	Pf3D7_10_v3-1681207-1684045-for__Pf3D7_10_v3-3082-5940-rev	2838	+
Pf3D7_12_v3	846	3684	Pf3D7_12_v3-846-3684-rev__Pf3D7_13_v3-2917501-2920344-for	2838	-
Pf3D7_13_v3	1469	4307	Pf3D7_13_v3-1469-4307-rev__Pf3D7_13_v3-2917501-2920311-for	2838	-
Pf3D7_02_v3	938943	941780	Pf3D7_02_v3-938943-941780-rev__Pf3D7_04_v3-4976-7822-for	2837	-
Pf3D7_03_v3	1060232	1063068	Pf3D7_03_v3-1060232-1063068-for__Pf3D7_04_v3-1196900-1199778-for	2836	+
Pf3D7_09_v3	1537710	1540545	Pf3D7_04_v3-1196901-1199792-for__Pf3D7_09_v3-1537710-1540545-for	2835	+
Pf3D7_01_v3	36259	39092	Pf3D7_01_v3-36259-39092-for__Pf3D7_04_v3-39287-42142-for	2833	+	[ID=PF3D7_0100200;feature=gene;description=rifin;],[ID=PF3D7_0100100;feature=gene;description=erythrocyte membrane protein 1, PfEMP1;]
Pf3D7_13_v3	960	3793	Pf3D7_08_v3-1469111-1472015-rev__Pf3D7_13_v3-960-3793-for	2833	+
Pf3D7_10_v3	5978	8810	Pf3D7_02_v3-938943-941767-rev__Pf3D7_10_v3-5978-8810-for	2832	+
Pf3D7_14_v3	8422	11254	Pf3D7_14_v3-3273567-3276347-for__Pf3D7_14_v3-8422-11254-rev	2832	-	[ID=PF3D7_1400200;feature=gene;description=rifin;],[ID=PF3D7_1400300;feature=gene;description=rifin;]
Pf3D7_14_v3	8422	11254	Pf3D7_14_v3-3273567-3276347-rev__Pf3D7_14_v3-8422-11254-for	2832	+	[ID=PF3D7_1400200;feature=gene;description=rifin;],[ID=PF3D7_1400300;feature=gene;description=rifin;]
Pf3D7_12_v3	2235436	2238267	Pf3D7_06_v3-1368751-1371558-for__Pf3D7_12_v3-2235436-2238267-for	2831	+	[ID=PF3D7_1255000;feature=gene;description=rifin;],[ID=PF3D7_1255100;feature=gene;description=rifin;]
Pf3D7_04_v3	39299	42127	Pf3D7_01_v3-605435-608247-rev__Pf3D7_04_v3-39299-42127-for	2828	+	[ID=PF3D7_0400200;feature=gene;description="erythrocyte membrane protein 1 (PfEMP1), exon 2, pseudogene";],[ID=PF3D7_0400300;feature=gene;description=rifin;]
Pf3D7_03_v3	8031	10858	Pf3D7_03_v3-8031-10858-rev__Pf3D7_12_v3-2263784-2266610-for	2827	-
Pf3D7_06_v3	1411338	1414165	Pf3D7_06_v3-1411338-1414165-rev__Pf3D7_10_v3-3095-5940-for	2827	-
Pf3D7_03_v3	1059919	1062745	Pf3D7_03_v3-1059919-1062745-for__Pf3D7_13_v3-2917573-2920371-for	2826	+
Pf3D7_12_v3	2263784	2266610	Pf3D7_03_v3-8031-10858-rev__Pf3D7_12_v3-2263784-2266610-for	2826	+
Pf3D7_10_v3	3115	5940	Pf3D7_10_v3-1681207-1684013-rev__Pf3D7_10_v3-3115-5940-for	2825	+
Pf3D7_02_v3	902126	904950	Pf3D7_02_v3-902126-904950-for__Pf3D7_13_v3-2866499-2869322-for	2824	+	[ID=PF3D7_0222900;feature=gene;description="erythrocyte membrane protein 1 (PfEMP1), exon 2, pseudogene";],[ID=PF3D7_0223100;feature=gene;description=rifin;]
Pf3D7_02_v3	938943	941767	Pf3D7_02_v3-938943-941767-rev__Pf3D7_10_v3-5978-8810-for	2824	-
Pf3D7_13_v3	2866499	2869322	Pf3D7_02_v3-902126-904950-for__Pf3D7_13_v3-2866499-2869322-for	2823	+	[ID=PF3D7_1372900;feature=gene;description="erythrocyte membrane protein 1 (PfEMP1), exon 2, pseudogene";],[ID=PF3D7_1373000;feature=gene;description=rifin;]
Pf3D7_03_v3	778	3600	Pf3D7_03_v3-1064735-1067523-rev__Pf3D7_03_v3-778-3600-for	2822	+
Pf3D7_01_v3	36271	39092	Pf3D7_01_v3-36271-39092-for__Pf3D7_12_v3-41097-43910-for	2821	+	[ID=PF3D7_0100200;feature=gene;description=rifin;],[ID=PF3D7_0100100;feature=gene;description=erythrocyte membrane protein 1, PfEMP1;]
Pf3D7_03_v3	1054388	1057209	Pf3D7_02_v3-7495-10294-rev__Pf3D7_03_v3-1054388-1057209-for	2821	+
Pf3D7_05_v3	30372	33193	Pf3D7_05_v3-30372-33193-rev__Pf3D7_10_v3-1623546-1626362-for	2821	-	[ID=PF3D7_0500400;feature=gene;description=rifin;],[ID=PF3D7_0500300;feature=gene;description=rifin, pseudogene;]
Pf3D7_04_v3	2801	5620	Pf3D7_04_v3-2801-5620-for__Pf3D7_07_v3-3622-6437-for	2819	+
Pf3D7_09_v3	37322	40141	Pf3D7_06_v3-24331-27144-for__Pf3D7_09_v3-37322-40141-for	2819	+	[ID=PF3D7_0900400;feature=gene;description=rifin;]
Pf3D7_07_v3	1412022	1414840	Pf3D7_01_v3-39797-42575-rev__Pf3D7_07_v3-1412022-1414840-for	2818	+	[ID=PF3D7_0732800;feature=gene;description="erythrocyte membrane protein 1 (PfEMP1), exon 2";],[ID=PF3D7_0732900;feature=gene;description=rifin;]
Pf3D7_09_v3	1489978	1492795	Pf3D7_01_v3-39777-42575-rev__Pf3D7_09_v3-1489978-1492795-for	2817	+	[ID=PF3D7_0937700;feature=gene;description=rifin;],[ID=PF3D7_0937600;feature=gene;description=erythrocyte membrane protein 1, PfEMP1;]
Pf3D7_09_v3	4241	7058	Pf3D7_09_v3-1533047-1535864-for__Pf3D7_09_v3-4241-7058-rev	2817	-
Pf3D7_09_v3	1533047	1535864	Pf3D7_09_v3-1533047-1535864-for__Pf3D7_09_v3-4241-7058-rev	2817	+
Pf3D7_09_v3	1533047	1535864	Pf3D7_09_v3-1533047-1535864-rev__Pf3D7_09_v3-4241-7058-for	2817	-
Pf3D7_09_v3	4241	7058	Pf3D7_09_v3-1533047-1535864-rev__Pf3D7_09_v3-4241-7058-for	2817	+
Pf3D7_09_v3	4241	7058	Pf3D7_09_v3-4241-7058-rev__Pf3D7_12_v3-2263794-2266610-for	2817	-
Pf3D7_10_v3	1623546	1626362	Pf3D7_05_v3-30372-33193-rev__Pf3D7_10_v3-1623546-1626362-for	2816	+	[ID=PF3D7_1040800;feature=gene;description=rifin;],[ID=PF3D7_1040700;feature=gene;description=rifin;]
Pf3D7_12_v3	2263794	2266610	Pf3D7_09_v3-4241-7058-rev__Pf3D7_12_v3-2263794-2266610-for	2816	+
Pf3D7_13_v3	2922421	2925236	Pf3D7_03_v3-742-3600-rev__Pf3D7_13_v3-2922421-2925236-for	2815	+
Pf3D7_11_v3	3655	6470	Pf3D7_04_v3-1194545-1197359-rev__Pf3D7_11_v3-3655-6470-for	2815	+
Pf3D7_07_v3	3622	6437	Pf3D7_04_v3-2801-5620-for__Pf3D7_07_v3-3622-6437-for	2815	+
Pf3D7_04_v3	2801	5615	Pf3D7_02_v3-4121-6932-for__Pf3D7_04_v3-2801-5615-for	2814	+
Pf3D7_04_v3	2801	5615	Pf3D7_03_v3-1057771-1060584-rev__Pf3D7_04_v3-2801-5615-for	2814	+
Pf3D7_04_v3	1194545	1197359	Pf3D7_04_v3-1194545-1197359-rev__Pf3D7_11_v3-3655-6470-for	2814	-
Pf3D7_04_v3	2801	5615	Pf3D7_04_v3-2801-5615-for__Pf3D7_11_v3-3627-6438-for	2814	+
Pf3D7_12_v3	41097	43910	Pf3D7_01_v3-36271-39092-for__Pf3D7_12_v3-41097-43910-for	2813	+	[ID=PF3D7_1200400;feature=gene;description=erythrocyte membrane protein 1, PfEMP1;],[ID=PF3D7_1200500;feature=gene;description=rifin;]
Pf3D7_03_v3	1057771	1060584	Pf3D7_03_v3-1057771-1060584-rev__Pf3D7_04_v3-2801-5615-for	2813	-
Pf3D7_06_v3	24331	27144	Pf3D7_06_v3-24331-27144-for__Pf3D7_09_v3-37322-40141-for	2813	+	[ID=PF3D7_0600500;feature=gene;description=rifin;]
Pf3D7_10_v3	5997	8810	Pf3D7_10_v3-5997-8810-rev__Pf3D7_13_v3-2913278-2916091-for	2813	-
Pf3D7_13_v3	2913278	2916091	Pf3D7_10_v3-5997-8810-rev__Pf3D7_13_v3-2913278-2916091-for	2813	+
Pf3D7_01_v3	605435	608247	Pf3D7_01_v3-605435-608247-rev__Pf3D7_04_v3-39299-42127-for	2812	-	[ID=PF3D7_0115700;feature=gene;description=erythrocyte membrane protein 1, PfEMP1;],[ID=PF3D7_0115600;feature=gene;description=rifin;]
Pf3D7_09_v3	2075	4887	Pf3D7_02_v3-4149-6959-for__Pf3D7_09_v3-2075-4887-for	2812	+
Pf3D7_14_v3	8422	11234	Pf3D7_12_v3-27569-30337-for__Pf3D7_14_v3-8422-11234-for	2812	+	[ID=PF3D7_1400200;feature=gene;description=rifin;],[ID=PF3D7_1400300;feature=gene;description=rifin;]
Pf3D7_03_v3	1028720	1031531	Pf3D7_01_v3-605322-608096-for__Pf3D7_03_v3-1028720-1031531-for	2811	+	[ID=PF3D7_0324800;feature=gene;description=rifin;],[ID=PF3D7_0324900;feature=gene;description=erythrocyte membrane protein 1, PfEMP1;]
Pf3D7_02_v3	4121	6932	Pf3D7_02_v3-4121-6932-for__Pf3D7_04_v3-2801-5615-for	2811	+
Pf3D7_10_v3	1681207	1684018	Pf3D7_02_v3-4149-6959-rev__Pf3D7_10_v3-1681207-1684018-for	2811	+
Pf3D7_11_v3	3627	6438	Pf3D7_04_v3-2801-5615-for__Pf3D7_11_v3-3627-6438-for	2811	+
Pf3D7_02_v3	4149	6959	Pf3D7_02_v3-4149-6959-for__Pf3D7_09_v3-2075-4887-for	2810	+
Pf3D7_02_v3	4149	6959	Pf3D7_02_v3-4149-6959-rev__Pf3D7_10_v3-1681207-1684018-for	2810	-
Pf3D7_13_v3	2917501	2920311	Pf3D7_05_v3-1034-3872-rev__Pf3D7_13_v3-2917501-2920311-for	2810	+
Pf3D7_13_v3	2917501	2920311	Pf3D7_08_v3-1049-3887-rev__Pf3D7_13_v3-2917501-2920311-for	2810	+
Pf3D7_13_v3	2917501	2920311	Pf3D7_13_v3-1469-4307-rev__Pf3D7_13_v3-2917501-2920311-for	2810	+
Pf3D7_06_v3	1368751	1371558	Pf3D7_06_v3-1368751-1371558-for__Pf3D7_12_v3-2235436-2238267-for	2807	+	[ID=PF3D7_0632700;feature=gene;description=rifin;],[ID=PF3D7_0632600;feature=gene;description=rifin, pseudogene;]
Pf3D7_01_v3	3230	6036	Pf3D7_01_v3-3230-6036-rev__Pf3D7_04_v3-1194583-1197386-for	2806	-
Pf3D7_10_v3	1681207	1684013	Pf3D7_10_v3-1681207-1684013-rev__Pf3D7_10_v3-3115-5940-for	2806	-
Pf3D7_04_v3	1194583	1197386	Pf3D7_01_v3-3230-6036-rev__Pf3D7_04_v3-1194583-1197386-for	2803	+
Pf3D7_03_v3	8702	11504	Pf3D7_03_v3-8702-11504-for__Pf3D7_04_v3-5667-8468-for	2802	+
Pf3D7_04_v3	5667	8468	Pf3D7_03_v3-8702-11504-for__Pf3D7_04_v3-5667-8468-for	2801	+
Pf3D7_09_v3	30890	33690	Pf3D7_09_v3-30890-33690-rev__Pf3D7_14_v3-3273710-3276492-for	2800	-	[ID=PF3D7_0900300;feature=gene;description=rifin;],[ID=PF3D7_0900200;feature=gene;description=rifin;]
Pf3D7_02_v3	7495	10294	Pf3D7_02_v3-7495-10294-rev__Pf3D7_03_v3-1054388-1057209-for	2799	-
Pf3D7_01_v3	39777	42575	Pf3D7_01_v3-39777-42575-rev__Pf3D7_09_v3-1489978-1492795-for	2798	-	[ID=PF3D7_0100200;feature=gene;description=rifin;],[ID=PF3D7_0100300;feature=gene;description=erythrocyte membrane protein 1, PfEMP1;]
Pf3D7_13_v3	2917573	2920371	Pf3D7_03_v3-1059919-1062745-for__Pf3D7_13_v3-2917573-2920371-for	2798	+
Pf3D7_02_v3	914349	917144	Pf3D7_02_v3-914349-917144-rev__Pf3D7_12_v3-41162-43907-for	2795	-	[ID=PF3D7_0223400;feature=gene;description=rifin;],[ID=PF3D7_0223500;feature=gene;description=erythrocyte membrane protein 1, PfEMP1;]
Pf3D7_14_v3	8422	11217	Pf3D7_10_v3-1636535-1639288-rev__Pf3D7_14_v3-8422-11217-for	2795	+	[ID=PF3D7_1400200;feature=gene;description=rifin;],[ID=PF3D7_1400300;feature=gene;description=rifin;]
Pf3D7_12_v3	4977	7771	Pf3D7_06_v3-1407286-1410079-rev__Pf3D7_12_v3-4977-7771-for	2794	+
Pf3D7_06_v3	1407286	1410079	Pf3D7_06_v3-1407286-1410079-rev__Pf3D7_12_v3-4977-7771-for	2793	-
Pf3D7_10_v3	1678371	1681164	Pf3D7_07_v3-5814-8597-rev__Pf3D7_10_v3-1678371-1681164-for	2793	+
Pf3D7_04_v3	6334	9124	Pf3D7_04_v3-6334-9124-rev__Pf3D7_12_v3-2262501-2265272-for	2790	-
Pf3D7_11_v3	81242	84031	Pf3D7_06_v3-1320697-1323475-rev__Pf3D7_11_v3-81242-84031-for	2789	+	[ID=PF3D7_1101500;feature=gene;description=exported+protein+family+4;],[ID=PF3D7_1101600;feature=gene;description=exported+protein+family+3;]
Pf3D7_03_v3	1064735	1067523	Pf3D7_03_v3-1064735-1067523-rev__Pf3D7_03_v3-778-3600-for	2788	-
Pf3D7_06_v3	1305867	1308650	Pf3D7_06_v3-1305867-1308650-rev__Pf3D7_06_v3-57129-59904-for	2783	-
Pf3D7_07_v3	5814	8597	Pf3D7_07_v3-5814-8597-rev__Pf3D7_10_v3-1678371-1681164-for	2783	-
Pf3D7_14_v3	3273710	3276492	Pf3D7_09_v3-30890-33690-rev__Pf3D7_14_v3-3273710-3276492-for	2782	+	[ID=PF3D7_1479600;feature=gene;description=rifin;],[ID=PF3D7_1479700;feature=gene;description=rifin;]
Pf3D7_14_v3	3273567	3276347	Pf3D7_14_v3-3273567-3276347-for__Pf3D7_14_v3-8422-11254-rev	2780	+	[ID=PF3D7_1479600;feature=gene;description=rifin;],[ID=PF3D7_1479700;feature=gene;description=rifin;]
Pf3D7_14_v3	3273567	3276347	Pf3D7_14_v3-3273567-3276347-rev__Pf3D7_14_v3-8422-11254-for	2780	-	[ID=PF3D7_1479600;feature=gene;description=rifin;],[ID=PF3D7_1479700;feature=gene;description=rifin;]
Pf3D7_01_v3	39797	42575	Pf3D7_01_v3-39797-42575-rev__Pf3D7_07_v3-1412022-1414840-for	2778	-	[ID=PF3D7_0100200;feature=gene;description=rifin;],[ID=PF3D7_0100300;feature=gene;description=erythrocyte membrane protein 1, PfEMP1;]
Pf3D7_12_v3	2268450	2271228	Pf3D7_04_v3-544-3287-rev__Pf3D7_12_v3-2268450-2271228-for	2778	+
Pf3D7_06_v3	1320697	1323475	Pf3D7_06_v3-1320697-1323475-rev__Pf3D7_11_v3-81242-84031-for	2778	-	[ID=PF3D7_0631500;feature=gene;description=exported+protein+family+3;],[ID=PF3D7_0631600;feature=gene;description=exported+protein+family+4;]
Pf3D7_02_v3	4878	7653	Pf3D7_02_v3-4878-7653-for__Pf3D7_10_v3-3860-6635-for	2775	+
Pf3D7_10_v3	3860	6635	Pf3D7_02_v3-4878-7653-for__Pf3D7_10_v3-3860-6635-for	2775	+
Pf3D7_06_v3	57129	59904	Pf3D7_06_v3-1305867-1308650-rev__Pf3D7_06_v3-57129-59904-for	2775	+
Pf3D7_01_v3	605322	608096	Pf3D7_01_v3-605322-608096-for__Pf3D7_03_v3-1028720-1031531-for	2774	+	[ID=PF3D7_0115700;feature=gene;description=erythrocyte membrane protein 1, PfEMP1;],[ID=PF3D7_0115600;feature=gene;description=rifin;]
Pf3D7_12_v3	2262501	2265272	Pf3D7_04_v3-6334-9124-rev__Pf3D7_12_v3-2262501-2265272-for	2771	+
Pf3D7_12_v3	2235497	2238267	Pf3D7_12_v3-2235497-2238267-for__Pf3D7_14_v3-3273553-3276287-for	2770	+	[ID=PF3D7_1255000;feature=gene;description=rifin;],[ID=PF3D7_1255100;feature=gene;description=rifin;]
Pf3D7_12_v3	27569	30337	Pf3D7_12_v3-27569-30337-for__Pf3D7_14_v3-8422-11234-for	2768	+	[ID=PF3D7_1200300;feature=gene;description=rifin;],[ID=PF3D7_1200200;feature=gene;description=rifin;]
Pf3D7_12_v3	2235500	2238267	Pf3D7_10_v3-1636487-1639228-for__Pf3D7_12_v3-2235500-2238267-for	2767	+	[ID=PF3D7_1255000;feature=gene;description=rifin;],[ID=PF3D7_1255100;feature=gene;description=rifin;]
Pf3D7_12_v3	2235502	2238267	Pf3D7_10_v3-39337-42062-rev__Pf3D7_12_v3-2235502-2238267-for	2765	+	[ID=PF3D7_1255000;feature=gene;description=rifin;],[ID=PF3D7_1255100;feature=gene;description=rifin;]
Pf3D7_07_v3	1440803	1443564	Pf3D7_07_v3-1440803-1443564-rev__Pf3D7_08_v3-3243-5962-for	2761	-
Pf3D7_06_v3	1305586	1308344	Pf3D7_06_v3-1305586-1308344-for__Pf3D7_06_v3-57129-59879-rev	2758	+
Pf3D7_04_v3	1171076	1173832	Pf3D7_04_v3-1171076-1173832-for__Pf3D7_13_v3-2882848-2885568-for	2756	+	[ID=PF3D7_0426000;feature=gene;description=erythrocyte membrane protein 1, PfEMP1;],[ID=PF3D7_0425900;feature=gene;description=rifin;]
Pf3D7_04_v3	1196879	1199633	Pf3D7_04_v3-1196879-1199633-rev__Pf3D7_11_v3-1246-4000-for	2754	-
Pf3D7_11_v3	1246	4000	Pf3D7_04_v3-1196879-1199633-rev__Pf3D7_11_v3-1246-4000-for	2754	+
Pf3D7_06_v3	1407323	1410077	Pf3D7_06_v3-1407323-1410077-for__Pf3D7_10_v3-1679260-1682014-for	2754	+
Pf3D7_10_v3	1679260	1682014	Pf3D7_06_v3-1407323-1410077-for__Pf3D7_10_v3-1679260-1682014-for	2754	+
Pf3D7_10_v3	1636535	1639288	Pf3D7_10_v3-1636535-1639288-rev__Pf3D7_14_v3-8422-11217-for	2753	-	[ID=PF3D7_1041200;feature=gene;description=rifin;],[ID=PF3D7_1041100;feature=gene;description=rifin;]
Pf3D7_10_v3	7165	9916	Pf3D7_08_v3-1462765-1465497-rev__Pf3D7_10_v3-7165-9916-for	2751	+
Pf3D7_06_v3	57129	59879	Pf3D7_06_v3-1305586-1308344-for__Pf3D7_06_v3-57129-59879-rev	2750	-
Pf3D7_02_v3	943605	946354	Pf3D7_02_v3-943605-946354-for__Pf3D7_06_v3-1413692-1416405-for	2749	+
Pf3D7_02_v3	943605	946354	Pf3D7_02_v3-943605-946354-rev__Pf3D7_04_v3-574-3287-for	2749	-
Pf3D7_12_v3	41162	43907	Pf3D7_02_v3-914349-917144-rev__Pf3D7_12_v3-41162-43907-for	2745	+	[ID=PF3D7_1200400;feature=gene;description=erythrocyte membrane protein 1, PfEMP1;],[ID=PF3D7_1200500;feature=gene;description=rifin;]
Pf3D7_14_v3	4558	7303	Pf3D7_13_v3-2882860-2885570-rev__Pf3D7_14_v3-4558-7303-for	2745	+	[ID=PF3D7_1400100;feature=gene;description="erythrocyte membrane protein 1 (PfEMP1), pseudogene";],[ID=PF3D7_1400200;feature=gene;description=rifin;]
Pf3D7_12_v3	2235523	2238267	Pf3D7_12_v3-2235523-2238267-for__Pf3D7_12_v3-27629-30346-rev	2744	+	[ID=PF3D7_1255000;feature=gene;description=rifin;],[ID=PF3D7_1255100;feature=gene;description=rifin;]
Pf3D7_12_v3	2235523	2238267	Pf3D7_12_v3-2235523-2238267-rev__Pf3D7_12_v3-27629-30346-for	2744	-	[ID=PF3D7_1255000;feature=gene;description=rifin;],[ID=PF3D7_1255100;feature=gene;description=rifin;]
Pf3D7_04_v3	544	3287	Pf3D7_04_v3-544-3287-rev__Pf3D7_12_v3-2268450-2271228-for	2743	-
Pf3D7_03_v3	62585	65327	Pf3D7_03_v3-62585-65327-for__Pf3D7_11_v3-46104-48845-for	2742	+	[ID=PF3D7_0300700;feature=gene;description=rifin;],[ID=PF3D7_0300800;feature=gene;description=rifin;]
Pf3D7_01_v3	6608	9349	Pf3D7_01_v3-6608-9349-for__Pf3D7_02_v3-7498-10220-for	2741	+
Pf3D7_11_v3	46104	48845	Pf3D7_03_v3-62585-65327-for__Pf3D7_11_v3-46104-48845-for	2741	+	[ID=PF3D7_1100300;feature=gene;description=rifin;],[ID=PF3D7_1100400;feature=gene;description=rifin;]
Pf3D7_07_v3	1412432	1415173	Pf3D7_07_v3-1412432-1415173-for__Pf3D7_08_v3-1430697-1433419-for	2741	+	[ID=PF3D7_0732900;feature=gene;description=rifin;]
Pf3D7_10_v3	1636487	1639228	Pf3D7_10_v3-1636487-1639228-for__Pf3D7_12_v3-2235500-2238267-for	2741	+	[ID=PF3D7_1041200;feature=gene;description=rifin;],[ID=PF3D7_1041100;feature=gene;description=rifin;]
Pf3D7_01_v3	6608	9347	Pf3D7_01_v3-6608-9347-rev__Pf3D7_08_v3-1462765-1465494-for	2739	-
Pf3D7_14_v3	3273553	3276287	Pf3D7_12_v3-2235497-2238267-for__Pf3D7_14_v3-3273553-3276287-for	2734	+	[ID=PF3D7_1479600;feature=gene;description=rifin;],[ID=PF3D7_1479700;feature=gene;description=rifin;]
Pf3D7_08_v3	1462765	1465497	Pf3D7_08_v3-1462765-1465497-rev__Pf3D7_10_v3-7165-9916-for	2732	-
Pf3D7_08_v3	1462765	1465494	Pf3D7_01_v3-6608-9347-rev__Pf3D7_08_v3-1462765-1465494-for	2729	+
Pf3D7_09_v3	1537710	1540435	Pf3D7_06_v3-1413692-1416407-for__Pf3D7_09_v3-1537710-1540435-for	2725	+
Pf3D7_10_v3	39337	42062	Pf3D7_10_v3-39337-42062-rev__Pf3D7_12_v3-2235502-2238267-for	2725	-	[ID=PF3D7_1000200;feature=gene;description=rifin;],[ID=PF3D7_1000300;feature=gene;description=rifin;]
Pf3D7_02_v3	7498	10220	Pf3D7_01_v3-6608-9349-for__Pf3D7_02_v3-7498-10220-for	2722	+
Pf3D7_07_v3	1412024	1414746	Pf3D7_03_v3-47266-49978-rev__Pf3D7_07_v3-1412024-1414746-for	2722	+	[ID=PF3D7_0732800;feature=gene;description="erythrocyte membrane protein 1 (PfEMP1), exon 2";],[ID=PF3D7_0732900;feature=gene;description=rifin;]
Pf3D7_08_v3	1430697	1433419	Pf3D7_07_v3-1412432-1415173-for__Pf3D7_08_v3-1430697-1433419-for	2722	+	[ID=PF3D7_0833400;feature=gene;description=rifin;]
Pf3D7_10_v3	35438	38160	Pf3D7_10_v3-35438-38160-for__Pf3D7_12_v3-41232-43910-for	2722	+	[ID=PF3D7_1000100;feature=gene;description=erythrocyte membrane protein 1, PfEMP1;],[ID=PF3D7_1000200;feature=gene;description=rifin;]
Pf3D7_03_v3	1064176	1066896	Pf3D7_03_v3-1064176-1066896-for__Pf3D7_13_v3-2922380-2925056-for	2720	+
Pf3D7_13_v3	2882848	2885568	Pf3D7_04_v3-1171076-1173832-for__Pf3D7_13_v3-2882848-2885568-for	2720	+	[ID=PF3D7_1373500;feature=gene;description=erythrocyte membrane protein 1, PfEMP1;],[ID=PF3D7_1373400;feature=gene;description=rifin;]
Pf3D7_09_v3	38024	40744	Pf3D7_09_v3-38024-40744-for__Pf3D7_13_v3-46058-48773-for	2720	+	[ID=PF3D7_0900400;feature=gene;description=rifin;]
Pf3D7_08_v3	3243	5962	Pf3D7_07_v3-1440803-1443564-rev__Pf3D7_08_v3-3243-5962-for	2719	+
Pf3D7_08_v3	3243	5961	Pf3D7_04_v3-1194578-1197294-rev__Pf3D7_08_v3-3243-5961-for	2718	+
Pf3D7_01_v3	601848	604565	Pf3D7_01_v3-39797-42510-for__Pf3D7_01_v3-601848-604565-rev	2717	-	[ID=PF3D7_0115500;feature=gene;description="erythrocyte membrane protein 1 (PfEMP1), pseudogene";],[ID=PF3D7_0115600;feature=gene;description=rifin;]
Pf3D7_01_v3	601848	604565	Pf3D7_01_v3-39797-42510-rev__Pf3D7_01_v3-601848-604565-for	2717	+	[ID=PF3D7_0115500;feature=gene;description="erythrocyte membrane protein 1 (PfEMP1), pseudogene";],[ID=PF3D7_0115600;feature=gene;description=rifin;]
Pf3D7_14_v3	4415	7132	Pf3D7_04_v3-1171269-1173977-rev__Pf3D7_14_v3-4415-7132-for	2717	+	[ID=PF3D7_1400100;feature=gene;description="erythrocyte membrane protein 1 (PfEMP1), pseudogene";]
Pf3D7_12_v3	27629	30346	Pf3D7_12_v3-2235523-2238267-for__Pf3D7_12_v3-27629-30346-rev	2717	-	[ID=PF3D7_1200300;feature=gene;description=rifin;],[ID=PF3D7_1200200;feature=gene;description=rifin;]
Pf3D7_12_v3	27629	30346	Pf3D7_12_v3-2235523-2238267-rev__Pf3D7_12_v3-27629-30346-for	2717	+	[ID=PF3D7_1200300;feature=gene;description=rifin;],[ID=PF3D7_1200200;feature=gene;description=rifin;]
Pf3D7_04_v3	1194578	1197294	Pf3D7_04_v3-1194578-1197294-rev__Pf3D7_08_v3-3243-5961-for	2716	-
Pf3D7_04_v3	572	3288	Pf3D7_04_v3-572-3288-for__Pf3D7_11_v3-1281-3979-for	2716	+
Pf3D7_06_v3	1413691	1416407	Pf3D7_06_v3-1413691-1416407-rev__Pf3D7_11_v3-1281-3979-for	2716	-
Pf3D7_09_v3	64236	66951	Pf3D7_01_v3-56701-59377-for__Pf3D7_09_v3-64236-66951-for	2715	+	[ID=PF3D7_0901200;feature=gene;description=Plasmodium exported protein, unknown function, fragment;]
Pf3D7_05_v3	6696	9411	Pf3D7_02_v3-7677-10358-for__Pf3D7_05_v3-6696-9411-for	2715	+
Pf3D7_13_v3	7131	9846	Pf3D7_02_v3-7677-10358-for__Pf3D7_13_v3-7131-9846-for	2715	+
Pf3D7_06_v3	1413692	1416407	Pf3D7_06_v3-1413692-1416407-for__Pf3D7_09_v3-1537710-1540435-for	2715	+
Pf3D7_13_v3	46058	48773	Pf3D7_09_v3-38024-40744-for__Pf3D7_13_v3-46058-48773-for	2715	+	[ID=PF3D7_1300400;feature=gene;description=rifin;]
Pf3D7_12_v3	45216	47930	Pf3D7_02_v3-34368-37069-for__Pf3D7_12_v3-45216-47930-for	2714	+	[ID=PF3D7_1200600;feature=gene;description=erythrocyte membrane protein 1, PfEMP1;]
Pf3D7_06_v3	1411371	1414085	Pf3D7_06_v3-1411371-1414085-rev__Pf3D7_08_v3-3243-5956-for	2714	-
Pf3D7_01_v3	39797	42510	Pf3D7_01_v3-39797-42510-for__Pf3D7_01_v3-601848-604565-rev	2713	+	[ID=PF3D7_0100200;feature=gene;description=rifin;],[ID=PF3D7_0100300;feature=gene;description=erythrocyte membrane protein 1, PfEMP1;]
Pf3D7_01_v3	39797	42510	Pf3D7_01_v3-39797-42510-rev__Pf3D7_01_v3-601848-604565-for	2713	-	[ID=PF3D7_0100200;feature=gene;description=rifin;],[ID=PF3D7_0100300;feature=gene;description=erythrocyte membrane protein 1, PfEMP1;]
Pf3D7_06_v3	1413692	1416405	Pf3D7_02_v3-943605-946354-for__Pf3D7_06_v3-1413692-1416405-for	2713	+
Pf3D7_04_v3	574	3287	Pf3D7_02_v3-943605-946354-rev__Pf3D7_04_v3-574-3287-for	2713	+
Pf3D7_03_v3	47265	49978	Pf3D7_03_v3-47265-49978-rev__Pf3D7_09_v3-1489980-1492688-for	2713	-	[ID=PF3D7_0300300;feature=gene;description="erythrocyte membrane protein 1 (PfEMP1), exon 2, pseudogene";],[ID=PF3D7_0300200;feature=gene;description=rifin;]
Pf3D7_08_v3	3243	5956	Pf3D7_06_v3-1411371-1414085-rev__Pf3D7_08_v3-3243-5956-for	2713	+
Pf3D7_03_v3	47266	49978	Pf3D7_03_v3-47266-49978-for__Pf3D7_06_v3-16097-18792-for	2712	+	[ID=PF3D7_0300300;feature=gene;description="erythrocyte membrane protein 1 (PfEMP1), exon 2, pseudogene";],[ID=PF3D7_0300200;feature=gene;description=rifin;]
Pf3D7_03_v3	47266	49978	Pf3D7_03_v3-47266-49978-rev__Pf3D7_07_v3-1412024-1414746-for	2712	-	[ID=PF3D7_0300300;feature=gene;description="erythrocyte membrane protein 1 (PfEMP1), exon 2, pseudogene";],[ID=PF3D7_0300200;feature=gene;description=rifin;]
Pf3D7_09_v3	1489978	1492688	Pf3D7_04_v3-1167633-1170293-for__Pf3D7_09_v3-1489978-1492688-for	2710	+	[ID=PF3D7_0937700;feature=gene;description=rifin;],[ID=PF3D7_0937600;feature=gene;description=erythrocyte membrane protein 1, PfEMP1;]
Pf3D7_13_v3	2882860	2885570	Pf3D7_13_v3-2882860-2885570-rev__Pf3D7_14_v3-4558-7303-for	2710	-	[ID=PF3D7_1373500;feature=gene;description=erythrocyte membrane protein 1, PfEMP1;],[ID=PF3D7_1373400;feature=gene;description=rifin;]
Pf3D7_07_v3	1412037	1414746	Pf3D7_04_v3-43061-45742-rev__Pf3D7_07_v3-1412037-1414746-for	2709	+	[ID=PF3D7_0732800;feature=gene;description="erythrocyte membrane protein 1 (PfEMP1), exon 2";],[ID=PF3D7_0732900;feature=gene;description=rifin;]
Pf3D7_10_v3	35441	38150	Pf3D7_10_v3-1640417-1643111-for__Pf3D7_10_v3-35441-38150-rev	2709	-	[ID=PF3D7_1000100;feature=gene;description=erythrocyte membrane protein 1, PfEMP1;],[ID=PF3D7_1000200;feature=gene;description=rifin;]
Pf3D7_10_v3	35441	38150	Pf3D7_10_v3-1640417-1643111-rev__Pf3D7_10_v3-35441-38150-for	2709	+	[ID=PF3D7_1000100;feature=gene;description=erythrocyte membrane protein 1, PfEMP1;],[ID=PF3D7_1000200;feature=gene;description=rifin;]
Pf3D7_09_v3	1489980	1492688	Pf3D7_03_v3-47265-49978-rev__Pf3D7_09_v3-1489980-1492688-for	2708	+	[ID=PF3D7_0937700;feature=gene;description=rifin;],[ID=PF3D7_0937600;feature=gene;description=erythrocyte membrane protein 1, PfEMP1;]
Pf3D7_04_v3	1171269	1173977	Pf3D7_04_v3-1171269-1173977-rev__Pf3D7_14_v3-4415-7132-for	2708	-	[ID=PF3D7_0426000;feature=gene;description=erythrocyte membrane protein 1, PfEMP1;]
Pf3D7_12_v3	2263915	2266621	Pf3D7_02_v3-6303-9001-rev__Pf3D7_12_v3-2263915-2266621-for	2706	+
Pf3D7_02_v3	910910	913614	Pf3D7_01_v3-601848-604532-for__Pf3D7_02_v3-910910-913614-for	2704	+	[ID=PF3D7_0223400;feature=gene;description=rifin;],[ID=PF3D7_0223300;feature=gene;description="erythrocyte membrane protein 1 (PfEMP1), exon 2";]
Pf3D7_02_v3	34368	37069	Pf3D7_02_v3-34368-37069-for__Pf3D7_12_v3-45216-47930-for	2701	+	[ID=PF3D7_0200300;feature=gene;description="erythrocyte membrane protein 1 (PfEMP1), exon 2";]
Pf3D7_12_v3	2229485	2232185	Pf3D7_06_v3-24146-26811-rev__Pf3D7_12_v3-2229485-2232185-for	2700	+	[ID=PF3D7_1254800;feature=gene;description=rifin;]
Pf3D7_04_v3	43043	45742	Pf3D7_01_v3-39876-42560-for__Pf3D7_04_v3-43043-45742-for	2699	+	[ID=PF3D7_0400400;feature=gene;description=erythrocyte membrane protein 1, PfEMP1;],[ID=PF3D7_0400300;feature=gene;description=rifin;]
Pf3D7_02_v3	6303	9001	Pf3D7_02_v3-6303-9001-rev__Pf3D7_12_v3-2263915-2266621-for	2698	-
Pf3D7_11_v3	1281	3979	Pf3D7_04_v3-572-3288-for__Pf3D7_11_v3-1281-3979-for	2698	+
Pf3D7_11_v3	1281	3979	Pf3D7_06_v3-1413691-1416407-rev__Pf3D7_11_v3-1281-3979-for	2698	+
Pf3D7_02_v3	910860	913556	Pf3D7_02_v3-910860-913556-rev__Pf3D7_04_v3-43061-45742-for	2696	-	[ID=PF3D7_0223400;feature=gene;description=rifin;],[ID=PF3D7_0223300;feature=gene;description="erythrocyte membrane protein 1 (PfEMP1), exon 2";]
Pf3D7_03_v3	8031	10727	Pf3D7_03_v3-8031-10727-for__Pf3D7_12_v3-5140-7836-for	2696	+
Pf3D7_12_v3	5140	7836	Pf3D7_03_v3-8031-10727-for__Pf3D7_12_v3-5140-7836-for	2696	+
Pf3D7_03_v3	8031	10727	Pf3D7_03_v3-8031-10727-rev__Pf3D7_09_v3-1533168-1535864-for	2696	-
Pf3D7_09_v3	1533168	1535864	Pf3D7_03_v3-8031-10727-rev__Pf3D7_09_v3-1533168-1535864-for	2696	+
Pf3D7_14_v3	8480	11176	Pf3D7_12_v3-2235589-2238267-rev__Pf3D7_14_v3-8480-11176-for	2696	+	[ID=PF3D7_1400200;feature=gene;description=rifin;],[ID=PF3D7_1400300;feature=gene;description=rifin;]
Pf3D7_06_v3	16097	18792	Pf3D7_03_v3-47266-49978-for__Pf3D7_06_v3-16097-18792-for	2695	+	[ID=PF3D7_0600300;feature=gene;description=rifin;],[ID=PF3D7_0600400;feature=gene;description=erythrocyte membrane protein 1, PfEMP1;]
Pf3D7_04_v3	1197103	1199798	Pf3D7_04_v3-1197103-1199798-for__Pf3D7_08_v3-1469185-1471867-for	2695	+
Pf3D7_09_v3	1489993	1492687	Pf3D7_04_v3-43061-45742-rev__Pf3D7_09_v3-1489993-1492687-for	2694	+	[ID=PF3D7_0937700;feature=gene;description=rifin;],[ID=PF3D7_0937600;feature=gene;description=erythrocyte membrane protein 1, PfEMP1;]
Pf3D7_10_v3	1640417	1643111	Pf3D7_10_v3-1640417-1643111-for__Pf3D7_10_v3-35441-38150-rev	2694	+	[ID=PF3D7_1041300;feature=gene;description=erythrocyte membrane protein 1, PfEMP1;],[ID=PF3D7_1041200;feature=gene;description=rifin;]
Pf3D7_10_v3	1640417	1643111	Pf3D7_10_v3-1640417-1643111-rev__Pf3D7_10_v3-35441-38150-for	2694	-	[ID=PF3D7_1041300;feature=gene;description=erythrocyte membrane protein 1, PfEMP1;],[ID=PF3D7_1041200;feature=gene;description=rifin;]
Pf3D7_07_v3	1411791	1414484	Pf3D7_03_v3-1024971-1027621-for__Pf3D7_07_v3-1411791-1414484-for	2693	+	[ID=PF3D7_0732800;feature=gene;description="erythrocyte membrane protein 1 (PfEMP1), exon 2";],[ID=PF3D7_0732900;feature=gene;description=rifin;]
Pf3D7_05_v3	525	3216	Pf3D7_05_v3-525-3216-for__Pf3D7_08_v3-582-3231-for	2691	+
Pf3D7_06_v3	1300956	1303645	Pf3D7_06_v3-1300956-1303645-rev__Pf3D7_11_v3-98278-100965-for	2689	-
Pf3D7_11_v3	98278	100965	Pf3D7_06_v3-1300956-1303645-rev__Pf3D7_11_v3-98278-100965-for	2687	+
Pf3D7_01_v3	39876	42560	Pf3D7_01_v3-39876-42560-for__Pf3D7_04_v3-43043-45742-for	2684	+	[ID=PF3D7_0100200;feature=gene;description=rifin;],[ID=PF3D7_0100300;feature=gene;description=erythrocyte membrane protein 1, PfEMP1;]
Pf3D7_01_v3	601848	604532	Pf3D7_01_v3-601848-604532-for__Pf3D7_02_v3-910910-913614-for	2684	+	[ID=PF3D7_0115500;feature=gene;description="erythrocyte membrane protein 1 (PfEMP1), pseudogene";],[ID=PF3D7_0115600;feature=gene;description=rifin;]
Pf3D7_14_v3	8422	11105	Pf3D7_09_v3-31039-33684-for__Pf3D7_14_v3-8422-11105-for	2683	+	[ID=PF3D7_1400200;feature=gene;description=rifin;],[ID=PF3D7_1400300;feature=gene;description=rifin;]
Pf3D7_08_v3	1469185	1471867	Pf3D7_04_v3-1197103-1199798-for__Pf3D7_08_v3-1469185-1471867-for	2682	+
Pf3D7_02_v3	7677	10358	Pf3D7_02_v3-7677-10358-for__Pf3D7_05_v3-6696-9411-for	2681	+
Pf3D7_02_v3	7677	10358	Pf3D7_02_v3-7677-10358-for__Pf3D7_13_v3-7131-9846-for	2681	+
Pf3D7_04_v3	43061	45742	Pf3D7_02_v3-910860-913556-rev__Pf3D7_04_v3-43061-45742-for	2681	+	[ID=PF3D7_0400400;feature=gene;description=erythrocyte membrane protein 1, PfEMP1;],[ID=PF3D7_0400300;feature=gene;description=rifin;]
Pf3D7_04_v3	43061	45742	Pf3D7_04_v3-43061-45742-rev__Pf3D7_07_v3-1412037-1414746-for	2681	-	[ID=PF3D7_0400400;feature=gene;description=erythrocyte membrane protein 1, PfEMP1;],[ID=PF3D7_0400300;feature=gene;description=rifin;]
Pf3D7_04_v3	43061	45742	Pf3D7_04_v3-43061-45742-rev__Pf3D7_09_v3-1489993-1492687-for	2681	-	[ID=PF3D7_0400400;feature=gene;description=erythrocyte membrane protein 1, PfEMP1;],[ID=PF3D7_0400300;feature=gene;description=rifin;]
Pf3D7_02_v3	910614	913294	Pf3D7_02_v3-910614-913294-for__Pf3D7_03_v3-1024971-1027621-for	2680	+	[ID=PF3D7_0223400;feature=gene;description=rifin;],[ID=PF3D7_0223300;feature=gene;description="erythrocyte membrane protein 1 (PfEMP1), exon 2";]
Pf3D7_08_v3	1469111	1471791	Pf3D7_04_v3-490-3159-rev__Pf3D7_08_v3-1469111-1471791-for	2680	+
Pf3D7_08_v3	1469111	1471791	Pf3D7_06_v3-1413820-1416489-for__Pf3D7_08_v3-1469111-1471791-for	2680	+
Pf3D7_01_v3	605417	608096	Pf3D7_01_v3-36422-39095-for__Pf3D7_01_v3-605417-608096-rev	2679	-	[ID=PF3D7_0115700;feature=gene;description=erythrocyte membrane protein 1, PfEMP1;],[ID=PF3D7_0115600;feature=gene;description=rifin;]
Pf3D7_01_v3	605417	608096	Pf3D7_01_v3-36422-39095-rev__Pf3D7_01_v3-605417-608096-for	2679	+	[ID=PF3D7_0115700;feature=gene;description=erythrocyte membrane protein 1, PfEMP1;],[ID=PF3D7_0115600;feature=gene;description=rifin;]
Pf3D7_08_v3	3284	5962	Pf3D7_07_v3-3756-6433-for__Pf3D7_08_v3-3284-5962-for	2678	+
Pf3D7_08_v3	3284	5962	Pf3D7_08_v3-3284-5962-for__Pf3D7_12_v3-3081-5759-for	2678	+
Pf3D7_12_v3	3081	5759	Pf3D7_08_v3-3284-5962-for__Pf3D7_12_v3-3081-5759-for	2678	+
Pf3D7_12_v3	41232	43910	Pf3D7_10_v3-35438-38160-for__Pf3D7_12_v3-41232-43910-for	2678	+	[ID=PF3D7_1200400;feature=gene;description=erythrocyte membrane protein 1, PfEMP1;],[ID=PF3D7_1200500;feature=gene;description=rifin;]
Pf3D7_12_v3	2235589	2238267	Pf3D7_12_v3-2235589-2238267-rev__Pf3D7_14_v3-8480-11176-for	2678	-	[ID=PF3D7_1255000;feature=gene;description=rifin;],[ID=PF3D7_1255100;feature=gene;description=rifin;]
Pf3D7_07_v3	3756	6433	Pf3D7_07_v3-3756-6433-for__Pf3D7_08_v3-3284-5962-for	2677	+
Pf3D7_01_v3	56701	59377	Pf3D7_01_v3-56701-59377-for__Pf3D7_09_v3-64236-66951-for	2676	+	[ID=PF3D7_0100700;feature=gene;description=Plasmodium exported protein, unknown function, fragment;]
Pf3D7_09_v3	1489747	1492423	Pf3D7_03_v3-1024971-1027621-for__Pf3D7_09_v3-1489747-1492423-for	2676	+	[ID=PF3D7_0937700;feature=gene;description=rifin;],[ID=PF3D7_0937600;feature=gene;description=erythrocyte membrane protein 1, PfEMP1;]
Pf3D7_13_v3	2922380	2925056	Pf3D7_03_v3-1064176-1066896-for__Pf3D7_13_v3-2922380-2925056-for	2676	+
Pf3D7_01_v3	39505	42179	Pf3D7_01_v3-39505-42179-rev__Pf3D7_10_v3-1637227-1639867-for	2674	-	[ID=PF3D7_0100200;feature=gene;description=rifin;]
Pf3D7_11_v3	5842	8516	Pf3D7_03_v3-8054-10727-for__Pf3D7_11_v3-5842-8516-for	2674	+
Pf3D7_01_v3	36422	39095	Pf3D7_01_v3-36422-39095-for__Pf3D7_01_v3-605417-608096-rev	2673	+	[ID=PF3D7_0100200;feature=gene;description=rifin;],[ID=PF3D7_0100100;feature=gene;description=erythrocyte membrane protein 1, PfEMP1;]
Pf3D7_01_v3	36422	39095	Pf3D7_01_v3-36422-39095-rev__Pf3D7_01_v3-605417-608096-for	2673	-	[ID=PF3D7_0100200;feature=gene;description=rifin;],[ID=PF3D7_0100100;feature=gene;description=erythrocyte membrane protein 1, PfEMP1;]
Pf3D7_03_v3	8054	10727	Pf3D7_03_v3-8054-10727-for__Pf3D7_11_v3-5842-8516-for	2673	+
Pf3D7_02_v3	54770	57442	Pf3D7_02_v3-54770-57442-rev__Pf3D7_14_v3-3280563-3283219-for	2672	-	[ID=PF3D7_0200900;feature=gene;description=stevor, pseudogene;],[ID=PF3D7_0201000;feature=gene;description=rifin;]
Pf3D7_07_v3	1437412	1440084	Pf3D7_02_v3-7652-10320-rev__Pf3D7_07_v3-1437412-1440084-for	2672	+
Pf3D7_04_v3	490	3159	Pf3D7_04_v3-490-3159-rev__Pf3D7_08_v3-1469111-1471791-for	2669	-
Pf3D7_06_v3	1413820	1416489	Pf3D7_06_v3-1413820-1416489-for__Pf3D7_08_v3-1469111-1471791-for	2669	+
Pf3D7_02_v3	7652	10320	Pf3D7_02_v3-7652-10320-rev__Pf3D7_07_v3-1437412-1440084-for	2668	-
Pf3D7_06_v3	16359	19025	Pf3D7_03_v3-1024971-1027621-rev__Pf3D7_06_v3-16359-19025-for	2666	+	[ID=PF3D7_0600300;feature=gene;description=rifin;],[ID=PF3D7_0600400;feature=gene;description=erythrocyte membrane protein 1, PfEMP1;]
Pf3D7_04_v3	43069	45735	Pf3D7_04_v3-1167639-1170284-for__Pf3D7_04_v3-43069-45735-rev	2666	-	[ID=PF3D7_0400400;feature=gene;description=erythrocyte membrane protein 1, PfEMP1;],[ID=PF3D7_0400300;feature=gene;description=rifin;]
Pf3D7_04_v3	43069	45735	Pf3D7_04_v3-1167639-1170284-rev__Pf3D7_04_v3-43069-45735-for	2666	+	[ID=PF3D7_0400400;feature=gene;description=erythrocyte membrane protein 1, PfEMP1;],[ID=PF3D7_0400300;feature=gene;description=rifin;]
Pf3D7_02_v3	943173	945838	Pf3D7_02_v3-943173-945838-rev__Pf3D7_03_v3-3884-6537-for	2665	-
Pf3D7_06_v3	24146	26811	Pf3D7_06_v3-24146-26811-rev__Pf3D7_12_v3-2229485-2232185-for	2665	-	[ID=PF3D7_0600500;feature=gene;description=rifin;]
Pf3D7_01_v3	601802	604466	Pf3D7_01_v3-601802-604466-for__Pf3D7_04_v3-1167639-1170284-for	2664	+	[ID=PF3D7_0115500;feature=gene;description="erythrocyte membrane protein 1 (PfEMP1), pseudogene";],[ID=PF3D7_0115600;feature=gene;description=rifin;]
Pf3D7_04_v3	1167633	1170293	Pf3D7_04_v3-1167633-1170293-for__Pf3D7_09_v3-1489978-1492688-for	2660	+	[ID=PF3D7_0425900;feature=gene;description=rifin;],[ID=PF3D7_0425800;feature=gene;description=erythrocyte membrane protein 1, PfEMP1;]
Pf3D7_14_v3	3280563	3283219	Pf3D7_02_v3-54770-57442-rev__Pf3D7_14_v3-3280563-3283219-for	2656	+	[ID=PF3D7_1479900;feature=gene;description=stevor;],[ID=PF3D7_1479800;feature=gene;description=rifin;]
Pf3D7_03_v3	46661	49315	Pf3D7_03_v3-46661-49315-for__Pf3D7_07_v3-55863-58510-for	2654	+	[ID=PF3D7_0300200;feature=gene;description=rifin;]
Pf3D7_03_v3	3884	6537	Pf3D7_02_v3-943173-945838-rev__Pf3D7_03_v3-3884-6537-for	2653	+
Pf3D7_14_v3	3283632	3286285	Pf3D7_08_v3-1415173-1417823-for__Pf3D7_14_v3-3283632-3286285-for	2653	+	[ID=PF3D7_1479900;feature=gene;description=stevor;],[ID=PF3D7_1480000;feature=gene;description=rifin;]
Pf3D7_08_v3	1433808	1436459	Pf3D7_08_v3-1433808-1436459-for__Pf3D7_12_v3-2239293-2241936-for	2651	+	[ID=PF3D7_0833400;feature=gene;description=rifin;],[ID=PF3D7_0833500;feature=gene;description=erythrocyte membrane protein 1, PfEMP1;]
Pf3D7_03_v3	1024971	1027621	Pf3D7_02_v3-910614-913294-for__Pf3D7_03_v3-1024971-1027621-for	2650	+	[ID=PF3D7_0324800;feature=gene;description=rifin;],[ID=PF3D7_0324700;feature=gene;description="erythrocyte membrane protein 1 (PfEMP1), exon 2, pseudogene";]
Pf3D7_03_v3	1024971	1027621	Pf3D7_03_v3-1024971-1027621-for__Pf3D7_07_v3-1411791-1414484-for	2650	+	[ID=PF3D7_0324800;feature=gene;description=rifin;],[ID=PF3D7_0324700;feature=gene;description="erythrocyte membrane protein 1 (PfEMP1), exon 2, pseudogene";]
Pf3D7_03_v3	1024971	1027621	Pf3D7_03_v3-1024971-1027621-for__Pf3D7_09_v3-1489747-1492423-for	2650	+	[ID=PF3D7_0324800;feature=gene;description=rifin;],[ID=PF3D7_0324700;feature=gene;description="erythrocyte membrane protein 1 (PfEMP1), exon 2, pseudogene";]
Pf3D7_03_v3	1024971	1027621	Pf3D7_03_v3-1024971-1027621-rev__Pf3D7_06_v3-16359-19025-for	2650	-	[ID=PF3D7_0324800;feature=gene;description=rifin;],[ID=PF3D7_0324700;feature=gene;description="erythrocyte membrane protein 1 (PfEMP1), exon 2, pseudogene";]
Pf3D7_09_v3	1537785	1540435	Pf3D7_04_v3-572-3212-rev__Pf3D7_09_v3-1537785-1540435-for	2650	+
Pf3D7_08_v3	1415173	1417823	Pf3D7_08_v3-1415173-1417823-for__Pf3D7_14_v3-3283632-3286285-for	2650	+	[ID=PF3D7_0832900;feature=gene;description=stevor;],[ID=PF3D7_0833000;feature=gene;description=rifin;]
Pf3D7_09_v3	1490043	1492692	Pf3D7_01_v3-601848-604479-for__Pf3D7_09_v3-1490043-1492692-for	2649	+	[ID=PF3D7_0937700;feature=gene;description=rifin;],[ID=PF3D7_0937600;feature=gene;description=erythrocyte membrane protein 1, PfEMP1;]
Pf3D7_08_v3	582	3231	Pf3D7_05_v3-525-3216-for__Pf3D7_08_v3-582-3231-for	2649	+
Pf3D7_07_v3	55863	58510	Pf3D7_03_v3-46661-49315-for__Pf3D7_07_v3-55863-58510-for	2647	+	[ID=PF3D7_0701100;feature=gene;description=rifin;]
Pf3D7_04_v3	1167639	1170284	Pf3D7_01_v3-601802-604466-for__Pf3D7_04_v3-1167639-1170284-for	2645	+	[ID=PF3D7_0425900;feature=gene;description=rifin;],[ID=PF3D7_0425800;feature=gene;description=erythrocyte membrane protein 1, PfEMP1;]
Pf3D7_04_v3	1167639	1170284	Pf3D7_04_v3-1167639-1170284-for__Pf3D7_04_v3-43069-45735-rev	2645	+	[ID=PF3D7_0425900;feature=gene;description=rifin;],[ID=PF3D7_0425800;feature=gene;description=erythrocyte membrane protein 1, PfEMP1;]
Pf3D7_04_v3	1167639	1170284	Pf3D7_04_v3-1167639-1170284-rev__Pf3D7_04_v3-43069-45735-for	2645	-	[ID=PF3D7_0425900;feature=gene;description=rifin;],[ID=PF3D7_0425800;feature=gene;description=erythrocyte membrane protein 1, PfEMP1;]
Pf3D7_06_v3	1413641	1416286	Pf3D7_06_v3-1413641-1416286-rev__Pf3D7_10_v3-840-3484-for	2645	-
Pf3D7_09_v3	31039	33684	Pf3D7_09_v3-31039-33684-for__Pf3D7_14_v3-8422-11105-for	2645	+	[ID=PF3D7_0900300;feature=gene;description=rifin;],[ID=PF3D7_0900200;feature=gene;description=rifin;]
Pf3D7_03_v3	1019853	1022497	Pf3D7_03_v3-1019853-1022497-rev__Pf3D7_14_v3-24823-27440-for	2644	-	[ID=PF3D7_0324500;feature=gene;description=rifin;],[ID=PF3D7_0324600;feature=gene;description=stevor;]
Pf3D7_10_v3	840	3484	Pf3D7_06_v3-1413641-1416286-rev__Pf3D7_10_v3-840-3484-for	2644	+
Pf3D7_10_v3	840	3484	Pf3D7_10_v3-1683509-1686136-for__Pf3D7_10_v3-840-3484-rev	2644	-
Pf3D7_10_v3	840	3484	Pf3D7_10_v3-1683509-1686136-rev__Pf3D7_10_v3-840-3484-for	2644	+
Pf3D7_12_v3	2268585	2271228	Pf3D7_06_v3-1413827-1416435-for__Pf3D7_12_v3-2268585-2271228-for	2643	+
Pf3D7_12_v3	2239293	2241936	Pf3D7_08_v3-1433808-1436459-for__Pf3D7_12_v3-2239293-2241936-for	2643	+	[ID=PF3D7_1255100;feature=gene;description=rifin;],[ID=PF3D7_1255200;feature=gene;description=erythrocyte membrane protein 1, PfEMP1;]
Pf3D7_13_v3	31214	33855	Pf3D7_10_v3-1637211-1639833-rev__Pf3D7_13_v3-31214-33855-for	2641	+	[ID=PF3D7_1300200;feature=gene;description=rifin;]
Pf3D7_10_v3	1637227	1639867	Pf3D7_01_v3-39505-42179-rev__Pf3D7_10_v3-1637227-1639867-for	2640	+	[ID=PF3D7_1041200;feature=gene;description=rifin;]
Pf3D7_01_v3	39539	42179	Pf3D7_01_v3-39539-42179-for__Pf3D7_09_v3-30492-33104-for	2640	+	[ID=PF3D7_0100200;feature=gene;description=rifin;]
Pf3D7_04_v3	572	3212	Pf3D7_04_v3-572-3212-rev__Pf3D7_09_v3-1537785-1540435-for	2640	-
Pf3D7_07_v3	1441016	1443656	Pf3D7_07_v3-1441016-1443656-for__Pf3D7_07_v3-3622-6220-rev	2640	+
Pf3D7_12_v3	2230993	2233632	Pf3D7_04_v3-75310-77923-rev__Pf3D7_12_v3-2230993-2233632-for	2639	+	[ID=PF3D7_1254900;feature=gene;description=Plasmodium exported protein, unknown function, fragment;]
Pf3D7_01_v3	1335	3967	Pf3D7_01_v3-1335-3967-rev__Pf3D7_13_v3-2917501-2920133-for	2632	-
Pf3D7_13_v3	2917501	2920133	Pf3D7_01_v3-1335-3967-rev__Pf3D7_13_v3-2917501-2920133-for	2632	+
Pf3D7_01_v3	601848	604479	Pf3D7_01_v3-601848-604479-for__Pf3D7_09_v3-1490043-1492692-for	2631	+	[ID=PF3D7_0115500;feature=gene;description="erythrocyte membrane protein 1 (PfEMP1), pseudogene";],[ID=PF3D7_0115600;feature=gene;description=rifin;]
Pf3D7_02_v3	910845	913475	Pf3D7_02_v3-910845-913475-for__Pf3D7_08_v3-1430326-1432911-for	2630	+	[ID=PF3D7_0223400;feature=gene;description=rifin;],[ID=PF3D7_0223300;feature=gene;description="erythrocyte membrane protein 1 (PfEMP1), exon 2";]
Pf3D7_09_v3	1489978	1492606	Pf3D7_08_v3-1430326-1432911-for__Pf3D7_09_v3-1489978-1492606-for	2628	+	[ID=PF3D7_0937700;feature=gene;description=rifin;],[ID=PF3D7_0937600;feature=gene;description=erythrocyte membrane protein 1, PfEMP1;]
Pf3D7_10_v3	1683509	1686136	Pf3D7_10_v3-1683509-1686136-for__Pf3D7_10_v3-840-3484-rev	2627	+
Pf3D7_10_v3	1683509	1686136	Pf3D7_10_v3-1683509-1686136-rev__Pf3D7_10_v3-840-3484-for	2627	-
Pf3D7_06_v3	59903	62527	Pf3D7_06_v3-1302328-1304950-for__Pf3D7_06_v3-59903-62527-rev	2624	-
Pf3D7_07_v3	34418	37042	Pf3D7_07_v3-34418-37042-rev__Pf3D7_10_v3-1606832-1609450-for	2624	-	[ID=PF3D7_0700300;feature=gene;description=rifin;],[ID=PF3D7_0700400;feature=gene;description=stevor;]
Pf3D7_09_v3	34936	37558	Pf3D7_02_v3-58600-61204-for__Pf3D7_09_v3-34936-37558-for	2622	+
Pf3D7_06_v3	1302328	1304950	Pf3D7_06_v3-1302328-1304950-for__Pf3D7_06_v3-59903-62527-rev	2622	+
Pf3D7_07_v3	1412436	1415058	Pf3D7_06_v3-15791-18403-rev__Pf3D7_07_v3-1412436-1415058-for	2622	+	[ID=PF3D7_0732900;feature=gene;description=rifin;]
Pf3D7_10_v3	1637211	1639833	Pf3D7_10_v3-1637211-1639833-rev__Pf3D7_13_v3-31214-33855-for	2622	-	[ID=PF3D7_1041200;feature=gene;description=rifin;]
Pf3D7_10_v3	1679251	1681872	Pf3D7_02_v3-939166-941780-for__Pf3D7_10_v3-1679251-1681872-for	2621	+
Pf3D7_13_v3	31234	33855	Pf3D7_12_v3-27040-29646-for__Pf3D7_13_v3-31234-33855-for	2621	+	[ID=PF3D7_1300200;feature=gene;description=rifin;]
Pf3D7_13_v3	2879028	2881648	Pf3D7_12_v3-2235679-2238267-for__Pf3D7_13_v3-2879028-2881648-for	2620	+	[ID=PF3D7_1373400;feature=gene;description=rifin;],[ID=PF3D7_1373300;feature=gene;description=rifin;]
Pf3D7_04_v3	572	3191	Pf3D7_04_v3-572-3191-rev__Pf3D7_13_v3-2917983-2920556-for	2619	-
Pf3D7_07_v3	1441016	1443635	Pf3D7_07_v3-1441016-1443635-rev__Pf3D7_07_v3-3644-6220-for	2619	-
Pf3D7_10_v3	35566	38184	Pf3D7_03_v3-43893-46503-for__Pf3D7_10_v3-35566-38184-for	2618	+	[ID=PF3D7_1000100;feature=gene;description=erythrocyte membrane protein 1, PfEMP1;],[ID=PF3D7_1000200;feature=gene;description=rifin;]
Pf3D7_10_v3	1606832	1609450	Pf3D7_07_v3-34418-37042-rev__Pf3D7_10_v3-1606832-1609450-for	2618	+	[ID=PF3D7_1040300;feature=gene;description=rifin;],[ID=PF3D7_1040200;feature=gene;description=stevor;]
Pf3D7_14_v3	24823	27440	Pf3D7_03_v3-1019853-1022497-rev__Pf3D7_14_v3-24823-27440-for	2617	+	[ID=PF3D7_1400700;feature=gene;description=stevor;],[ID=PF3D7_1400800;feature=gene;description=rifin;]
Pf3D7_03_v3	43886	46503	Pf3D7_03_v3-43886-46503-rev__Pf3D7_09_v3-1493573-1496174-for	2617	-	[ID=PF3D7_0300100;feature=gene;description=erythrocyte membrane protein 1, PfEMP1;],[ID=PF3D7_0300200;feature=gene;description=rifin;]
Pf3D7_03_v3	43888	46504	Pf3D7_03_v3-43888-46504-for__Pf3D7_12_v3-41355-43935-for	2616	+	[ID=PF3D7_0300100;feature=gene;description=erythrocyte membrane protein 1, PfEMP1;],[ID=PF3D7_0300200;feature=gene;description=rifin;]
Pf3D7_06_v3	16178	18794	Pf3D7_06_v3-16178-18794-rev__Pf3D7_08_v3-1430326-1432911-for	2616	-	[ID=PF3D7_0600300;feature=gene;description=rifin;],[ID=PF3D7_0600400;feature=gene;description=erythrocyte membrane protein 1, PfEMP1;]
Pf3D7_09_v3	35701	38316	Pf3D7_03_v3-57584-60183-for__Pf3D7_09_v3-35701-38316-for	2615	+
Pf3D7_02_v3	939166	941780	Pf3D7_02_v3-939166-941780-for__Pf3D7_10_v3-1679251-1681872-for	2614	+
Pf3D7_10_v3	35601	38215	Pf3D7_10_v3-35601-38215-for__Pf3D7_11_v3-64300-66851-for	2614	+	[ID=PF3D7_1000100;feature=gene;description=erythrocyte membrane protein 1, PfEMP1;],[ID=PF3D7_1000200;feature=gene;description=rifin;]
Pf3D7_03_v3	69314	71927	Pf3D7_03_v3-69314-71927-rev__Pf3D7_14_v3-3254084-3256695-for	2613	-	[ID=PF3D7_0301000;feature=gene;description=acyl-CoA+synthetase;]
Pf3D7_04_v3	75310	77923	Pf3D7_04_v3-75310-77923-rev__Pf3D7_12_v3-2230993-2233632-for	2613	-	[ID=PF3D7_0401100;feature=gene;description=Plasmodium exported protein, unknown function, fragment;]
Pf3D7_09_v3	30492	33104	Pf3D7_01_v3-39539-42179-for__Pf3D7_09_v3-30492-33104-for	2612	+	[ID=PF3D7_0900200;feature=gene;description=rifin;]
Pf3D7_06_v3	15791	18403	Pf3D7_06_v3-15791-18403-rev__Pf3D7_07_v3-1412436-1415058-for	2612	-	[ID=PF3D7_0600300;feature=gene;description=rifin;]
Pf3D7_14_v3	3254084	3256695	Pf3D7_03_v3-69314-71927-rev__Pf3D7_14_v3-3254084-3256695-for	2611	+	[ID=PF3D7_1479000;feature=gene;description=acyl-CoA+synthetase;]
Pf3D7_03_v3	43893	46503	Pf3D7_01_v3-605396-607975-rev__Pf3D7_03_v3-43893-46503-for	2610	+	[ID=PF3D7_0300100;feature=gene;description=erythrocyte membrane protein 1, PfEMP1;],[ID=PF3D7_0300200;feature=gene;description=rifin;]
Pf3D7_03_v3	43893	46503	Pf3D7_03_v3-43893-46503-for__Pf3D7_10_v3-35566-38184-for	2610	+	[ID=PF3D7_0300100;feature=gene;description=erythrocyte membrane protein 1, PfEMP1;],[ID=PF3D7_0300200;feature=gene;description=rifin;]
Pf3D7_04_v3	39545	42155	Pf3D7_04_v3-39545-42155-rev__Pf3D7_09_v3-1493584-1496190-for	2610	-	[ID=PF3D7_0400200;feature=gene;description="erythrocyte membrane protein 1 (PfEMP1), exon 2, pseudogene";],[ID=PF3D7_0400300;feature=gene;description=rifin;]
Pf3D7_10_v3	35601	38210	Pf3D7_01_v3-79349-81925-for__Pf3D7_10_v3-35601-38210-for	2609	+	[ID=PF3D7_1000100;feature=gene;description=erythrocyte membrane protein 1, PfEMP1;],[ID=PF3D7_1000200;feature=gene;description=rifin;]
Pf3D7_06_v3	1413827	1416435	Pf3D7_06_v3-1413827-1416435-for__Pf3D7_12_v3-2268585-2271228-for	2608	+
Pf3D7_12_v3	2235660	2238267	Pf3D7_09_v3-31099-33684-rev__Pf3D7_12_v3-2235660-2238267-for	2607	+	[ID=PF3D7_1255000;feature=gene;description=rifin;],[ID=PF3D7_1255100;feature=gene;description=rifin;]
Pf3D7_09_v3	1493584	1496190	Pf3D7_04_v3-39545-42155-rev__Pf3D7_09_v3-1493584-1496190-for	2606	+	[ID=PF3D7_0937800;feature=gene;description=erythrocyte membrane protein 1, PfEMP1;],[ID=PF3D7_0937700;feature=gene;description=rifin;]
Pf3D7_12_v3	27040	29646	Pf3D7_12_v3-27040-29646-for__Pf3D7_13_v3-31234-33855-for	2606	+	[ID=PF3D7_1200200;feature=gene;description=rifin;]
Pf3D7_02_v3	58600	61204	Pf3D7_02_v3-58600-61204-for__Pf3D7_09_v3-34936-37558-for	2604	+	[ID=PF3D7_0201100;feature=gene;description=Plasmodium exported protein, unknown function, fragment;]
Pf3D7_09_v3	4241	6845	Pf3D7_09_v3-4241-6845-rev__Pf3D7_10_v3-1679251-1681853-for	2604	-
Pf3D7_10_v3	1679251	1681853	Pf3D7_09_v3-4241-6845-rev__Pf3D7_10_v3-1679251-1681853-for	2602	+
Pf3D7_09_v3	1493573	1496174	Pf3D7_03_v3-43886-46503-rev__Pf3D7_09_v3-1493573-1496174-for	2601	+	[ID=PF3D7_0937800;feature=gene;description=erythrocyte membrane protein 1, PfEMP1;],[ID=PF3D7_0937700;feature=gene;description=rifin;]
Pf3D7_09_v3	4081	6681	Pf3D7_09_v3-4081-6681-for__Pf3D7_10_v3-5824-8424-for	2600	+
Pf3D7_10_v3	5824	8424	Pf3D7_09_v3-4081-6681-for__Pf3D7_10_v3-5824-8424-for	2600	+
Pf3D7_03_v3	57584	60183	Pf3D7_03_v3-57584-60183-for__Pf3D7_09_v3-35701-38316-for	2599	+	[ID=PF3D7_0300600;feature=gene;description=Plasmodium exported protein, unknown function, fragment;]
Pf3D7_10_v3	35561	38160	Pf3D7_04_v3-39563-42142-for__Pf3D7_10_v3-35561-38160-for	2599	+	[ID=PF3D7_1000100;feature=gene;description=erythrocyte membrane protein 1, PfEMP1;],[ID=PF3D7_1000200;feature=gene;description=rifin;]
Pf3D7_13_v3	31256	33855	Pf3D7_09_v3-30532-33120-for__Pf3D7_13_v3-31256-33855-for	2599	+	[ID=PF3D7_1300200;feature=gene;description=rifin;]
Pf3D7_07_v3	3622	6220	Pf3D7_07_v3-1441016-1443656-for__Pf3D7_07_v3-3622-6220-rev	2598	-
Pf3D7_04_v3	1196901	1199498	Pf3D7_04_v3-1196901-1199498-for__Pf3D7_13_v3-2917887-2920456-for	2597	+
Pf3D7_10_v3	1683624	1686219	Pf3D7_10_v3-1683624-1686219-rev__Pf3D7_12_v3-655-3234-for	2595	-
Pf3D7_04_v3	1196901	1199494	Pf3D7_04_v3-1196901-1199494-rev__Pf3D7_10_v3-840-3433-for	2593	-
Pf3D7_10_v3	840	3433	Pf3D7_04_v3-1196901-1199494-rev__Pf3D7_10_v3-840-3433-for	2593	+
Pf3D7_04_v3	43142	45735	Pf3D7_04_v3-43142-45735-rev__Pf3D7_08_v3-1430332-1432911-for	2593	-	[ID=PF3D7_0400400;feature=gene;description=erythrocyte membrane protein 1, PfEMP1;],[ID=PF3D7_0400300;feature=gene;description=rifin;]
Pf3D7_01_v3	601802	604393	Pf3D7_01_v3-601802-604393-for__Pf3D7_08_v3-1430332-1432911-for	2591	+	[ID=PF3D7_0115500;feature=gene;description="erythrocyte membrane protein 1 (PfEMP1), pseudogene";],[ID=PF3D7_0115600;feature=gene;description=rifin;]
Pf3D7_08_v3	1469118	1471709	Pf3D7_08_v3-1469118-1471709-for__Pf3D7_13_v3-2918022-2920556-for	2591	+
Pf3D7_10_v3	5997	8588	Pf3D7_10_v3-1679250-1681840-for__Pf3D7_10_v3-5997-8588-rev	2591	-
Pf3D7_10_v3	5997	8588	Pf3D7_10_v3-1679250-1681840-rev__Pf3D7_10_v3-5997-8588-for	2591	+
Pf3D7_11_v3	5800	8390	Pf3D7_02_v3-939200-941780-rev__Pf3D7_11_v3-5800-8390-for	2590	+
Pf3D7_10_v3	1679250	1681840	Pf3D7_10_v3-1679250-1681840-for__Pf3D7_10_v3-5997-8588-rev	2590	+
Pf3D7_10_v3	1679250	1681840	Pf3D7_10_v3-1679250-1681840-rev__Pf3D7_10_v3-5997-8588-for	2590	-
Pf3D7_03_v3	43893	46481	Pf3D7_03_v3-43893-46481-rev__Pf3D7_10_v3-1640405-1642986-for	2588	-	[ID=PF3D7_0300100;feature=gene;description=erythrocyte membrane protein 1, PfEMP1;],[ID=PF3D7_0300200;feature=gene;description=rifin;]
Pf3D7_09_v3	30532	33120	Pf3D7_09_v3-30532-33120-for__Pf3D7_13_v3-31256-33855-for	2588	+	[ID=PF3D7_0900200;feature=gene;description=rifin;]
Pf3D7_12_v3	2235679	2238267	Pf3D7_12_v3-2235679-2238267-for__Pf3D7_13_v3-2879028-2881648-for	2588	+	[ID=PF3D7_1255000;feature=gene;description=rifin;],[ID=PF3D7_1255100;feature=gene;description=rifin;]
Pf3D7_09_v3	1620	4206	Pf3D7_04_v3-1195229-1197814-rev__Pf3D7_09_v3-1620-4206-for	2586	+
Pf3D7_08_v3	1430326	1432911	Pf3D7_02_v3-910845-913475-for__Pf3D7_08_v3-1430326-1432911-for	2585	+	[ID=PF3D7_0833400;feature=gene;description=rifin;],[ID=PF3D7_0833300;feature=gene;description="erythrocyte membrane protein 1 (PfEMP1), exon 2, pseudogene";]
Pf3D7_04_v3	1195229	1197814	Pf3D7_04_v3-1195229-1197814-rev__Pf3D7_09_v3-1620-4206-for	2585	-
Pf3D7_04_v3	1197202	1199787	Pf3D7_04_v3-1197202-1199787-rev__Pf3D7_08_v3-643-3200-for	2585	-
Pf3D7_08_v3	1430326	1432911	Pf3D7_06_v3-16178-18794-rev__Pf3D7_08_v3-1430326-1432911-for	2585	+	[ID=PF3D7_0833400;feature=gene;description=rifin;],[ID=PF3D7_0833300;feature=gene;description="erythrocyte membrane protein 1 (PfEMP1), exon 2, pseudogene";]
Pf3D7_08_v3	1430326	1432911	Pf3D7_08_v3-1430326-1432911-for__Pf3D7_09_v3-1489978-1492606-for	2585	+	[ID=PF3D7_0833400;feature=gene;description=rifin;],[ID=PF3D7_0833300;feature=gene;description="erythrocyte membrane protein 1 (PfEMP1), exon 2, pseudogene";]
Pf3D7_10_v3	35607	38192	Pf3D7_09_v3-1493565-1496123-rev__Pf3D7_10_v3-35607-38192-for	2585	+	[ID=PF3D7_1000100;feature=gene;description=erythrocyte membrane protein 1, PfEMP1;],[ID=PF3D7_1000200;feature=gene;description=rifin;]
Pf3D7_09_v3	31099	33684	Pf3D7_09_v3-31099-33684-rev__Pf3D7_12_v3-2235660-2238267-for	2585	-	[ID=PF3D7_0900300;feature=gene;description=rifin;],[ID=PF3D7_0900200;feature=gene;description=rifin;]
Pf3D7_04_v3	599864	602448	Pf3D7_04_v3-599864-602448-for__Pf3D7_07_v3-559100-561680-for	2584	+
Pf3D7_10_v3	1640405	1642986	Pf3D7_03_v3-43893-46481-rev__Pf3D7_10_v3-1640405-1642986-for	2581	+	[ID=PF3D7_1041300;feature=gene;description=erythrocyte membrane protein 1, PfEMP1;],[ID=PF3D7_1041200;feature=gene;description=rifin;]
Pf3D7_10_v3	1640405	1642986	Pf3D7_09_v3-1493595-1496167-for__Pf3D7_10_v3-1640405-1642986-for	2581	+	[ID=PF3D7_1041300;feature=gene;description=erythrocyte membrane protein 1, PfEMP1;],[ID=PF3D7_1041200;feature=gene;description=rifin;]
Pf3D7_02_v3	914343	916923	Pf3D7_02_v3-914343-916923-for__Pf3D7_09_v3-1493594-1496144-for	2580	+	[ID=PF3D7_0223400;feature=gene;description=rifin;],[ID=PF3D7_0223500;feature=gene;description=erythrocyte membrane protein 1, PfEMP1;]
Pf3D7_02_v3	939200	941780	Pf3D7_02_v3-939200-941780-rev__Pf3D7_11_v3-5800-8390-for	2580	-
Pf3D7_12_v3	41355	43935	Pf3D7_03_v3-43888-46504-for__Pf3D7_12_v3-41355-43935-for	2580	+	[ID=PF3D7_1200400;feature=gene;description=erythrocyte membrane protein 1, PfEMP1;],[ID=PF3D7_1200500;feature=gene;description=rifin;]
Pf3D7_07_v3	559100	561680	Pf3D7_04_v3-599864-602448-for__Pf3D7_07_v3-559100-561680-for	2580	+
Pf3D7_08_v3	1430332	1432911	Pf3D7_01_v3-601802-604393-for__Pf3D7_08_v3-1430332-1432911-for	2579	+	[ID=PF3D7_0833400;feature=gene;description=rifin;],[ID=PF3D7_0833300;feature=gene;description="erythrocyte membrane protein 1 (PfEMP1), exon 2, pseudogene";]
Pf3D7_01_v3	605396	607975	Pf3D7_01_v3-605396-607975-rev__Pf3D7_03_v3-43893-46503-for	2579	-	[ID=PF3D7_0115700;feature=gene;description=erythrocyte membrane protein 1, PfEMP1;],[ID=PF3D7_0115600;feature=gene;description=rifin;]
Pf3D7_04_v3	39563	42142	Pf3D7_04_v3-39563-42142-for__Pf3D7_10_v3-35561-38160-for	2579	+	[ID=PF3D7_0400200;feature=gene;description="erythrocyte membrane protein 1 (PfEMP1), exon 2, pseudogene";],[ID=PF3D7_0400300;feature=gene;description=rifin;]
Pf3D7_08_v3	1430332	1432911	Pf3D7_04_v3-43142-45735-rev__Pf3D7_08_v3-1430332-1432911-for	2579	+	[ID=PF3D7_0833400;feature=gene;description=rifin;],[ID=PF3D7_0833300;feature=gene;description="erythrocyte membrane protein 1 (PfEMP1), exon 2, pseudogene";]
Pf3D7_12_v3	655	3234	Pf3D7_10_v3-1683624-1686219-rev__Pf3D7_12_v3-655-3234-for	2579	+
Pf3D7_10_v3	42335	44914	Pf3D7_10_v3-42335-44914-for__Pf3D7_13_v3-54629-57207-for	2579	+	[ID=PF3D7_1000300;feature=gene;description=rifin;],[ID=PF3D7_1000400;feature=gene;description=rifin;]
Pf3D7_13_v3	54629	57207	Pf3D7_10_v3-42335-44914-for__Pf3D7_13_v3-54629-57207-for	2578	+	[ID=PF3D7_1300600;feature=gene;description=rifin;],[ID=PF3D7_1300700;feature=gene;description=rifin;]
Pf3D7_14_v3	4555	7132	Pf3D7_12_v3-2239501-2242061-rev__Pf3D7_14_v3-4555-7132-for	2577	+	[ID=PF3D7_1400100;feature=gene;description="erythrocyte membrane protein 1 (PfEMP1), pseudogene";]
Pf3D7_01_v3	79349	81925	Pf3D7_01_v3-79349-81925-for__Pf3D7_10_v3-35601-38210-for	2576	+	[ID=PF3D7_0101500;feature=gene;description="erythrocyte membrane protein 1 (PfEMP1), exon 2, pseudogene";],[ID=PF3D7_0101600;feature=gene;description=rifin;]
Pf3D7_07_v3	3644	6220	Pf3D7_07_v3-1441016-1443635-rev__Pf3D7_07_v3-3644-6220-for	2576	+
Pf3D7_13_v3	2917983	2920556	Pf3D7_04_v3-572-3191-rev__Pf3D7_13_v3-2917983-2920556-for	2573	+
Pf3D7_09_v3	1493595	1496167	Pf3D7_09_v3-1493595-1496167-for__Pf3D7_10_v3-1640405-1642986-for	2572	+	[ID=PF3D7_0937800;feature=gene;description=erythrocyte membrane protein 1, PfEMP1;],[ID=PF3D7_0937700;feature=gene;description=rifin;]
Pf3D7_03_v3	47347	49918	Pf3D7_03_v3-47347-49918-rev__Pf3D7_08_v3-1430373-1432911-for	2571	-	[ID=PF3D7_0300300;feature=gene;description="erythrocyte membrane protein 1 (PfEMP1), exon 2, pseudogene";],[ID=PF3D7_0300200;feature=gene;description=rifin;]
Pf3D7_03_v3	8031	10601	Pf3D7_03_v3-8031-10601-rev__Pf3D7_13_v3-2913535-2916104-for	2570	-
Pf3D7_05_v3	5332	7902	Pf3D7_05_v3-5332-7902-rev__Pf3D7_12_v3-2264041-2266610-for	2570	-
Pf3D7_13_v3	5767	8337	Pf3D7_12_v3-2264041-2266610-rev__Pf3D7_13_v3-5767-8337-for	2570	+
Pf3D7_13_v3	2913535	2916104	Pf3D7_03_v3-8031-10601-rev__Pf3D7_13_v3-2913535-2916104-for	2569	+
Pf3D7_13_v3	2917887	2920456	Pf3D7_04_v3-1196901-1199498-for__Pf3D7_13_v3-2917887-2920456-for	2569	+
Pf3D7_12_v3	2264041	2266610	Pf3D7_05_v3-5332-7902-rev__Pf3D7_12_v3-2264041-2266610-for	2569	+
Pf3D7_12_v3	2264041	2266610	Pf3D7_12_v3-2264041-2266610-rev__Pf3D7_13_v3-5767-8337-for	2569	-
Pf3D7_12_v3	2229279	2231845	Pf3D7_09_v3-1481747-1484281-for__Pf3D7_12_v3-2229279-2231845-for	2566	+	[ID=PF3D7_1254800;feature=gene;description=rifin;]
Pf3D7_01_v3	842	3407	Pf3D7_01_v3-842-3407-for__Pf3D7_04_v3-572-3113-for	2565	+
Pf3D7_01_v3	842	3407	Pf3D7_01_v3-842-3407-rev__Pf3D7_06_v3-1413866-1416407-for	2565	-
Pf3D7_10_v3	1620488	1623053	Pf3D7_05_v3-33686-36238-rev__Pf3D7_10_v3-1620488-1623053-for	2565	+	[ID=PF3D7_1040700;feature=gene;description=rifin;]
Pf3D7_01_v3	473651	476211	Pf3D7_01_v3-473651-476211-for__Pf3D7_13_v3-2799927-2802468-for	2560	+	[ID=PF3D7_0112400;feature=gene;description=unspecified+product;],[ID=PF3D7_0112300;feature=gene;description=18S+ribosomal+RNA;]
Pf3D7_12_v3	2239501	2242061	Pf3D7_12_v3-2239501-2242061-rev__Pf3D7_14_v3-4555-7132-for	2560	-	[ID=PF3D7_1255200;feature=gene;description=erythrocyte membrane protein 1, PfEMP1;]
Pf3D7_12_v3	2229262	2231821	Pf3D7_01_v3-48286-50840-rev__Pf3D7_12_v3-2229262-2231821-for	2559	+	[ID=PF3D7_1254800;feature=gene;description=rifin;]
Pf3D7_09_v3	1493565	1496123	Pf3D7_09_v3-1493565-1496123-rev__Pf3D7_10_v3-35607-38192-for	2558	-	[ID=PF3D7_0937800;feature=gene;description=erythrocyte membrane protein 1, PfEMP1;],[ID=PF3D7_0937700;feature=gene;description=rifin;]
Pf3D7_08_v3	643	3200	Pf3D7_04_v3-1197202-1199787-rev__Pf3D7_08_v3-643-3200-for	2557	+
Pf3D7_06_v3	1413692	1416248	Pf3D7_06_v3-1413692-1416248-for__Pf3D7_13_v3-2917887-2920414-for	2556	+
Pf3D7_12_v3	26862	29417	Pf3D7_01_v3-602439-604983-rev__Pf3D7_12_v3-26862-29417-for	2555	+	[ID=PF3D7_1200200;feature=gene;description=rifin;]
Pf3D7_01_v3	48286	50840	Pf3D7_01_v3-48286-50840-rev__Pf3D7_12_v3-2229262-2231821-for	2554	-	[ID=PF3D7_0100400;feature=gene;description=rifin;]
Pf3D7_04_v3	1196832	1199386	Pf3D7_04_v3-1196832-1199386-rev__Pf3D7_05_v3-1001-3555-for	2554	-
Pf3D7_05_v3	1001	3555	Pf3D7_04_v3-1196832-1199386-rev__Pf3D7_05_v3-1001-3555-for	2554	+
Pf3D7_04_v3	1196832	1199386	Pf3D7_04_v3-1196832-1199386-rev__Pf3D7_13_v3-1436-3990-for	2554	-
Pf3D7_13_v3	1436	3990	Pf3D7_04_v3-1196832-1199386-rev__Pf3D7_13_v3-1436-3990-for	2554	+
Pf3D7_06_v3	24591	27144	Pf3D7_06_v3-1342007-1344544-for__Pf3D7_06_v3-24591-27144-rev	2553	-	[ID=PF3D7_0600500;feature=gene;description=rifin;]
Pf3D7_06_v3	24591	27144	Pf3D7_06_v3-1342007-1344544-rev__Pf3D7_06_v3-24591-27144-for	2553	+	[ID=PF3D7_0600500;feature=gene;description=rifin;]
Pf3D7_05_v3	33686	36238	Pf3D7_05_v3-33686-36238-rev__Pf3D7_10_v3-1620488-1623053-for	2552	-	[ID=PF3D7_0500400;feature=gene;description=rifin;]
Pf3D7_11_v3	64300	66851	Pf3D7_10_v3-35601-38215-for__Pf3D7_11_v3-64300-66851-for	2551	+	[ID=PF3D7_1101000;feature=gene;description="erythrocyte membrane protein 1 (PfEMP1), pseudogene";],[ID=PF3D7_1101100;feature=gene;description=rifin;]
Pf3D7_09_v3	1493594	1496144	Pf3D7_02_v3-914343-916923-for__Pf3D7_09_v3-1493594-1496144-for	2550	+	[ID=PF3D7_0937800;feature=gene;description=erythrocyte membrane protein 1, PfEMP1;],[ID=PF3D7_0937700;feature=gene;description=rifin;]
Pf3D7_06_v3	1407527	1410076	Pf3D7_06_v3-1407527-1410076-for__Pf3D7_07_v3-1439033-1441582-for	2549	+
Pf3D7_07_v3	1439033	1441582	Pf3D7_06_v3-1407527-1410076-for__Pf3D7_07_v3-1439033-1441582-for	2549	+
Pf3D7_01_v3	602439	604983	Pf3D7_01_v3-602439-604983-rev__Pf3D7_12_v3-26862-29417-for	2544	-	[ID=PF3D7_0115600;feature=gene;description=rifin;]
Pf3D7_09_v3	1620	4164	Pf3D7_09_v3-1620-4164-rev__Pf3D7_10_v3-1681930-1684473-for	2544	-
Pf3D7_03_v3	3884	6427	Pf3D7_03_v3-3884-6427-for__Pf3D7_10_v3-1212-3755-for	2543	+
Pf3D7_10_v3	1212	3755	Pf3D7_03_v3-3884-6427-for__Pf3D7_10_v3-1212-3755-for	2543	+
Pf3D7_10_v3	1681930	1684473	Pf3D7_09_v3-1620-4164-rev__Pf3D7_10_v3-1681930-1684473-for	2543	+
Pf3D7_13_v3	2799927	2802468	Pf3D7_01_v3-473651-476211-for__Pf3D7_13_v3-2799927-2802468-for	2541	+	[ID=PF3D7_1371000;feature=gene;description=18S+ribosomal+RNA;]
Pf3D7_10_v3	1640405	1642946	Pf3D7_01_v3-79351-81877-rev__Pf3D7_10_v3-1640405-1642946-for	2541	+	[ID=PF3D7_1041300;feature=gene;description=erythrocyte membrane protein 1, PfEMP1;],[ID=PF3D7_1041200;feature=gene;description=rifin;]
Pf3D7_04_v3	572	3113	Pf3D7_01_v3-842-3407-for__Pf3D7_04_v3-572-3113-for	2541	+
Pf3D7_06_v3	1413866	1416407	Pf3D7_01_v3-842-3407-rev__Pf3D7_06_v3-1413866-1416407-for	2541	+
Pf3D7_02_v3	51892	54433	Pf3D7_02_v3-51892-54433-for__Pf3D7_13_v3-60156-62694-for	2541	+	[ID=PF3D7_0200900;feature=gene;description=stevor, pseudogene;],[ID=PF3D7_0200800;feature=gene;description="erythrocyte membrane protein 1 (PfEMP1), exon 2, pseudogene";]
Pf3D7_13_v3	60156	62694	Pf3D7_02_v3-51892-54433-for__Pf3D7_13_v3-60156-62694-for	2538	+	[ID=PF3D7_1300900;feature=gene;description=stevor;],[ID=PF3D7_1300800;feature=gene;description="erythrocyte membrane protein 1 (PfEMP1), pseudogene";]
Pf3D7_08_v3	1430373	1432911	Pf3D7_03_v3-47347-49918-rev__Pf3D7_08_v3-1430373-1432911-for	2538	+	[ID=PF3D7_0833400;feature=gene;description=rifin;],[ID=PF3D7_0833300;feature=gene;description="erythrocyte membrane protein 1 (PfEMP1), exon 2, pseudogene";]
Pf3D7_06_v3	1342007	1344544	Pf3D7_06_v3-1342007-1344544-for__Pf3D7_06_v3-24591-27144-rev	2537	+	[ID=PF3D7_0632200;feature=gene;description=rifin;]
Pf3D7_06_v3	1342007	1344544	Pf3D7_06_v3-1342007-1344544-rev__Pf3D7_06_v3-24591-27144-for	2537	-	[ID=PF3D7_0632200;feature=gene;description=rifin;]
Pf3D7_13_v3	2918022	2920556	Pf3D7_08_v3-1469118-1471709-for__Pf3D7_13_v3-2918022-2920556-for	2534	+
Pf3D7_09_v3	1481747	1484281	Pf3D7_09_v3-1481747-1484281-for__Pf3D7_12_v3-2229279-2231845-for	2534	+	[ID=PF3D7_0937500;feature=gene;description=rifin;]
Pf3D7_03_v3	43968	46501	Pf3D7_01_v3-79378-81897-for__Pf3D7_03_v3-43968-46501-for	2533	+	[ID=PF3D7_0300100;feature=gene;description=erythrocyte membrane protein 1, PfEMP1;],[ID=PF3D7_0300200;feature=gene;description=rifin;]
Pf3D7_04_v3	39746	42276	Pf3D7_04_v3-39746-42276-for__Pf3D7_12_v3-41532-44044-for	2530	+	[ID=PF3D7_0400200;feature=gene;description="erythrocyte membrane protein 1 (PfEMP1), exon 2, pseudogene";],[ID=PF3D7_0400300;feature=gene;description=rifin;]
Pf3D7_09_v3	1493594	1496122	Pf3D7_01_v3-36585-39095-rev__Pf3D7_09_v3-1493594-1496122-for	2528	+	[ID=PF3D7_0937800;feature=gene;description=erythrocyte membrane protein 1, PfEMP1;],[ID=PF3D7_0937700;feature=gene;description=rifin;]
Pf3D7_13_v3	2917887	2920414	Pf3D7_06_v3-1413692-1416248-for__Pf3D7_13_v3-2917887-2920414-for	2527	+
Pf3D7_01_v3	79351	81877	Pf3D7_01_v3-79351-81877-rev__Pf3D7_10_v3-1640405-1642946-for	2526	-	[ID=PF3D7_0101500;feature=gene;description="erythrocyte membrane protein 1 (PfEMP1), exon 2, pseudogene";],[ID=PF3D7_0101600;feature=gene;description=rifin;]
Pf3D7_13_v3	2872977	2875503	Pf3D7_06_v3-24146-26667-rev__Pf3D7_13_v3-2872977-2875503-for	2526	+	[ID=PF3D7_1373100;feature=gene;description=rifin;]
Pf3D7_10_v3	1640422	1642946	Pf3D7_10_v3-1640422-1642946-rev__Pf3D7_11_v3-64302-66781-for	2524	-	[ID=PF3D7_1041300;feature=gene;description=erythrocyte membrane protein 1, PfEMP1;],[ID=PF3D7_1041200;feature=gene;description=rifin;]
Pf3D7_10_v3	42391	44914	Pf3D7_09_v3-43508-46000-for__Pf3D7_10_v3-42391-44914-for	2523	+	[ID=PF3D7_1000300;feature=gene;description=rifin;],[ID=PF3D7_1000400;feature=gene;description=rifin;]
Pf3D7_13_v3	60156	62677	Pf3D7_02_v3-900282-902802-rev__Pf3D7_13_v3-60156-62677-for	2521	+	[ID=PF3D7_1300900;feature=gene;description=stevor;],[ID=PF3D7_1300800;feature=gene;description="erythrocyte membrane protein 1 (PfEMP1), pseudogene";]
Pf3D7_06_v3	24146	26667	Pf3D7_06_v3-24146-26667-rev__Pf3D7_13_v3-2872977-2875503-for	2521	-	[ID=PF3D7_0600500;feature=gene;description=rifin;]
Pf3D7_09_v3	1490628	1493149	Pf3D7_09_v3-1490628-1493149-for__Pf3D7_13_v3-2879853-2882364-for	2521	+	[ID=PF3D7_0937700;feature=gene;description=rifin;]
Pf3D7_02_v3	900282	902802	Pf3D7_02_v3-900282-902802-rev__Pf3D7_13_v3-60156-62677-for	2520	-	[ID=PF3D7_0222900;feature=gene;description="erythrocyte membrane protein 1 (PfEMP1), exon 2, pseudogene";],[ID=PF3D7_0222800;feature=gene;description=stevor;]
Pf3D7_01_v3	79378	81897	Pf3D7_01_v3-79378-81897-for__Pf3D7_03_v3-43968-46501-for	2519	+	[ID=PF3D7_0101500;feature=gene;description="erythrocyte membrane protein 1 (PfEMP1), exon 2, pseudogene";],[ID=PF3D7_0101600;feature=gene;description=rifin;]
Pf3D7_06_v3	1413691	1416205	Pf3D7_03_v3-1060232-1062745-for__Pf3D7_06_v3-1413691-1416205-for	2514	+
Pf3D7_04_v3	774	3288	Pf3D7_03_v3-1060232-1062745-rev__Pf3D7_04_v3-774-3288-for	2514	+
Pf3D7_10_v3	6296	8810	Pf3D7_10_v3-6296-8810-rev__Pf3D7_12_v3-2263784-2266298-for	2514	-
Pf3D7_12_v3	2263784	2266298	Pf3D7_10_v3-6296-8810-rev__Pf3D7_12_v3-2263784-2266298-for	2514	+
Pf3D7_03_v3	1060232	1062745	Pf3D7_03_v3-1060232-1062745-for__Pf3D7_06_v3-1413691-1416205-for	2513	+
Pf3D7_03_v3	1060232	1062745	Pf3D7_03_v3-1060232-1062745-rev__Pf3D7_04_v3-774-3288-for	2513	-
Pf3D7_12_v3	41532	44044	Pf3D7_04_v3-39746-42276-for__Pf3D7_12_v3-41532-44044-for	2512	+	[ID=PF3D7_1200400;feature=gene;description=erythrocyte membrane protein 1, PfEMP1;],[ID=PF3D7_1200500;feature=gene;description=rifin;]
Pf3D7_01_v3	473651	476162	Pf3D7_01_v3-473651-476162-for__Pf3D7_11_v3-1925917-1928422-for	2511	+	[ID=PF3D7_0112400;feature=gene;description=unspecified+product;],[ID=PF3D7_0112300;feature=gene;description=18S+ribosomal+RNA;]
Pf3D7_13_v3	2879853	2882364	Pf3D7_09_v3-1490628-1493149-for__Pf3D7_13_v3-2879853-2882364-for	2511	+	[ID=PF3D7_1373400;feature=gene;description=rifin;]
Pf3D7_01_v3	36585	39095	Pf3D7_01_v3-36585-39095-rev__Pf3D7_09_v3-1493594-1496122-for	2510	-	[ID=PF3D7_0100200;feature=gene;description=rifin;],[ID=PF3D7_0100100;feature=gene;description=erythrocyte membrane protein 1, PfEMP1;]
Pf3D7_02_v3	2468	4977	Pf3D7_02_v3-2468-4977-for__Pf3D7_03_v3-4101-6609-for	2509	+
Pf3D7_03_v3	4101	6609	Pf3D7_02_v3-2468-4977-for__Pf3D7_03_v3-4101-6609-for	2508	+
Pf3D7_11_v3	1925917	1928422	Pf3D7_01_v3-473651-476162-for__Pf3D7_11_v3-1925917-1928422-for	2505	+	[ID=PF3D7_1148600;feature=gene;description=18S+ribosomal+RNA;]
Pf3D7_04_v3	1171076	1173580	Pf3D7_04_v3-1171076-1173580-rev__Pf3D7_13_v3-28256-30712-for	2504	-	[ID=PF3D7_0426000;feature=gene;description=erythrocyte membrane protein 1, PfEMP1;],[ID=PF3D7_0425900;feature=gene;description=rifin;]
Pf3D7_04_v3	693	3191	Pf3D7_04_v3-693-3191-for__Pf3D7_10_v3-840-3337-for	2498	+
Pf3D7_10_v3	840	3337	Pf3D7_04_v3-693-3191-for__Pf3D7_10_v3-840-3337-for	2497	+
Pf3D7_03_v3	249	2741	Pf3D7_03_v3-249-2741-rev__Pf3D7_13_v3-2922817-2925236-for	2492	-
Pf3D7_09_v3	43508	46000	Pf3D7_09_v3-43508-46000-for__Pf3D7_10_v3-42391-44914-for	2492	+	[ID=PF3D7_0900500;feature=gene;description=rifin;],[ID=PF3D7_0900600;feature=gene;description=rifin;]
Pf3D7_03_v3	1029303	1031792	Pf3D7_03_v3-1029303-1031792-for__Pf3D7_06_v3-28139-30573-for	2489	+	[ID=PF3D7_0324900;feature=gene;description=erythrocyte membrane protein 1, PfEMP1;]
Pf3D7_06_v3	1413691	1416178	Pf3D7_05_v3-1001-3487-rev__Pf3D7_06_v3-1413691-1416178-for	2487	+
Pf3D7_06_v3	1413691	1416178	Pf3D7_06_v3-1413691-1416178-rev__Pf3D7_13_v3-1436-3922-for	2487	-
Pf3D7_04_v3	801	3287	Pf3D7_04_v3-801-3287-for__Pf3D7_12_v3-846-3298-for	2486	+
Pf3D7_05_v3	1001	3487	Pf3D7_05_v3-1001-3487-rev__Pf3D7_06_v3-1413691-1416178-for	2486	-
Pf3D7_13_v3	1436	3922	Pf3D7_06_v3-1413691-1416178-rev__Pf3D7_13_v3-1436-3922-for	2486	+
Pf3D7_06_v3	1413692	1416178	Pf3D7_06_v3-1413692-1416178-rev__Pf3D7_12_v3-846-3298-for	2486	-
Pf3D7_01_v3	36612	39095	Pf3D7_01_v3-36612-39095-for__Pf3D7_11_v3-64329-66799-for	2483	+	[ID=PF3D7_0100200;feature=gene;description=rifin;],[ID=PF3D7_0100100;feature=gene;description=erythrocyte membrane protein 1, PfEMP1;]
Pf3D7_09_v3	1493533	1496016	Pf3D7_01_v3-605356-607827-for__Pf3D7_09_v3-1493533-1496016-for	2483	+	[ID=PF3D7_0937800;feature=gene;description=erythrocyte membrane protein 1, PfEMP1;],[ID=PF3D7_0937700;feature=gene;description=rifin;]
Pf3D7_09_v3	30411	32891	Pf3D7_01_v3-602439-604904-rev__Pf3D7_09_v3-30411-32891-for	2480	+	[ID=PF3D7_0900200;feature=gene;description=rifin;]
Pf3D7_06_v3	1369468	1371948	Pf3D7_06_v3-1369468-1371948-rev__Pf3D7_07_v3-56333-58796-for	2480	-	[ID=PF3D7_0632700;feature=gene;description=rifin;]
Pf3D7_08_v3	1469111	1471591	Pf3D7_08_v3-1469111-1471591-rev__Pf3D7_10_v3-840-3305-for	2480	-
Pf3D7_11_v3	64302	66781	Pf3D7_10_v3-1640422-1642946-rev__Pf3D7_11_v3-64302-66781-for	2479	+	[ID=PF3D7_1101000;feature=gene;description="erythrocyte membrane protein 1 (PfEMP1), pseudogene";],[ID=PF3D7_1101100;feature=gene;description=rifin;]
Pf3D7_03_v3	1028754	1031232	Pf3D7_03_v3-1028754-1031232-for__Pf3D7_09_v3-1493533-1495989-for	2478	+	[ID=PF3D7_0324800;feature=gene;description=rifin;],[ID=PF3D7_0324900;feature=gene;description=erythrocyte membrane protein 1, PfEMP1;]
Pf3D7_06_v3	1372607	1375082	Pf3D7_01_v3-605277-607663-for__Pf3D7_06_v3-1372607-1375082-for	2475	+	[ID=PF3D7_0632700;feature=gene;description=rifin;],[ID=PF3D7_0632800;feature=gene;description=erythrocyte membrane protein 1, PfEMP1;]
Pf3D7_10_v3	1580331	1582803	Pf3D7_06_v3-61739-64209-rev__Pf3D7_10_v3-1580331-1582803-for	2472	+
Pf3D7_07_v3	53224	55696	Pf3D7_07_v3-53224-55696-rev__Pf3D7_09_v3-1493573-1495991-for	2472	-	[ID=PF3D7_0701000;feature=gene;description="erythrocyte membrane protein 1 (PfEMP1), pseudogene";],[ID=PF3D7_0701100;feature=gene;description=rifin;]
Pf3D7_01_v3	605356	607827	Pf3D7_01_v3-605356-607827-for__Pf3D7_09_v3-1493533-1496016-for	2471	+	[ID=PF3D7_0115700;feature=gene;description=erythrocyte membrane protein 1, PfEMP1;],[ID=PF3D7_0115600;feature=gene;description=rifin;]
Pf3D7_11_v3	64329	66799	Pf3D7_01_v3-36612-39095-for__Pf3D7_11_v3-64329-66799-for	2470	+	[ID=PF3D7_1101000;feature=gene;description="erythrocyte membrane protein 1 (PfEMP1), pseudogene";],[ID=PF3D7_1101100;feature=gene;description=rifin;]
Pf3D7_04_v3	516	2986	Pf3D7_04_v3-516-2986-for__Pf3D7_08_v3-748-3200-for	2470	+
Pf3D7_04_v3	818	3288	Pf3D7_04_v3-818-3288-for__Pf3D7_05_v3-1018-3487-for	2470	+
Pf3D7_04_v3	818	3288	Pf3D7_04_v3-818-3288-for__Pf3D7_13_v3-1453-3922-for	2470	+
Pf3D7_06_v3	61739	64209	Pf3D7_06_v3-61739-64209-rev__Pf3D7_10_v3-1580331-1582803-for	2470	-
Pf3D7_05_v3	1018	3487	Pf3D7_04_v3-818-3288-for__Pf3D7_05_v3-1018-3487-for	2469	+
Pf3D7_13_v3	1453	3922	Pf3D7_04_v3-818-3288-for__Pf3D7_13_v3-1453-3922-for	2469	+
Pf3D7_01_v3	602439	604904	Pf3D7_01_v3-602439-604904-rev__Pf3D7_09_v3-30411-32891-for	2465	-	[ID=PF3D7_0115600;feature=gene;description=rifin;]
Pf3D7_10_v3	38997	41462	Pf3D7_07_v3-56383-58842-for__Pf3D7_10_v3-38997-41462-for	2465	+	[ID=PF3D7_1000200;feature=gene;description=rifin;]
Pf3D7_10_v3	840	3305	Pf3D7_08_v3-1469111-1471591-rev__Pf3D7_10_v3-840-3305-for	2465	+
Pf3D7_02_v3	58313	60777	Pf3D7_02_v3-58313-60777-rev__Pf3D7_08_v3-1424530-1426992-for	2464	-	[ID=PF3D7_0201100;feature=gene;description=Plasmodium exported protein, unknown function, fragment;],[ID=PF3D7_0201000;feature=gene;description=rifin;]
Pf3D7_07_v3	56333	58796	Pf3D7_06_v3-1369468-1371948-rev__Pf3D7_07_v3-56333-58796-for	2463	+	[ID=PF3D7_0701100;feature=gene;description=rifin;]
Pf3D7_08_v3	1424530	1426992	Pf3D7_02_v3-58313-60777-rev__Pf3D7_08_v3-1424530-1426992-for	2462	+	[ID=PF3D7_0833200;feature=gene;description=rifin;]
Pf3D7_05_v3	5580	8042	Pf3D7_05_v3-5580-8042-rev__Pf3D7_06_v3-1407207-1409668-for	2462	-
Pf3D7_13_v3	6015	8477	Pf3D7_06_v3-1407207-1409668-rev__Pf3D7_13_v3-6015-8477-for	2462	+
Pf3D7_06_v3	1407207	1409668	Pf3D7_05_v3-5580-8042-rev__Pf3D7_06_v3-1407207-1409668-for	2461	+
Pf3D7_06_v3	1407207	1409668	Pf3D7_06_v3-1407207-1409668-rev__Pf3D7_13_v3-6015-8477-for	2461	-
Pf3D7_07_v3	56383	58842	Pf3D7_07_v3-56383-58842-for__Pf3D7_10_v3-38997-41462-for	2459	+	[ID=PF3D7_0701100;feature=gene;description=rifin;]
Pf3D7_02_v3	914344	916801	Pf3D7_01_v3-79451-81877-rev__Pf3D7_02_v3-914344-916801-for	2457	+	[ID=PF3D7_0223400;feature=gene;description=rifin;],[ID=PF3D7_0223500;feature=gene;description=erythrocyte membrane protein 1, PfEMP1;]
Pf3D7_09_v3	1493533	1495989	Pf3D7_03_v3-1028754-1031232-for__Pf3D7_09_v3-1493533-1495989-for	2456	+	[ID=PF3D7_0937800;feature=gene;description=erythrocyte membrane protein 1, PfEMP1;],[ID=PF3D7_0937700;feature=gene;description=rifin;]
Pf3D7_10_v3	35736	38192	Pf3D7_03_v3-1028786-1031234-rev__Pf3D7_10_v3-35736-38192-for	2456	+	[ID=PF3D7_1000100;feature=gene;description=erythrocyte membrane protein 1, PfEMP1;],[ID=PF3D7_1000200;feature=gene;description=rifin;]
Pf3D7_13_v3	28256	30712	Pf3D7_04_v3-1171076-1173580-rev__Pf3D7_13_v3-28256-30712-for	2456	+	[ID=PF3D7_1300100;feature=gene;description=erythrocyte membrane protein 1, PfEMP1;],[ID=PF3D7_1300200;feature=gene;description=rifin;]
Pf3D7_04_v3	1171079	1173535	Pf3D7_04_v3-1171079-1173535-for__Pf3D7_12_v3-2239312-2241753-for	2456	+	[ID=PF3D7_0426000;feature=gene;description=erythrocyte membrane protein 1, PfEMP1;],[ID=PF3D7_0425900;feature=gene;description=rifin;]
Pf3D7_09_v3	64236	66692	Pf3D7_06_v3-1343250-1345643-rev__Pf3D7_09_v3-64236-66692-for	2456	+	[ID=PF3D7_0901200;feature=gene;description=Plasmodium exported protein, unknown function, fragment;]
Pf3D7_10_v3	1640888	1643344	Pf3D7_06_v3-28139-30552-for__Pf3D7_10_v3-1640888-1643344-for	2456	+	[ID=PF3D7_1041300;feature=gene;description=erythrocyte membrane protein 1, PfEMP1;]
Pf3D7_08_v3	748	3200	Pf3D7_04_v3-516-2986-for__Pf3D7_08_v3-748-3200-for	2452	+
Pf3D7_12_v3	846	3298	Pf3D7_04_v3-801-3287-for__Pf3D7_12_v3-846-3298-for	2452	+
Pf3D7_12_v3	846	3298	Pf3D7_06_v3-1413692-1416178-rev__Pf3D7_12_v3-846-3298-for	2452	+
Pf3D7_03_v3	47528	49978	Pf3D7_03_v3-1025204-1027621-for__Pf3D7_03_v3-47528-49978-rev	2450	-	[ID=PF3D7_0300300;feature=gene;description="erythrocyte membrane protein 1 (PfEMP1), exon 2, pseudogene";],[ID=PF3D7_0300200;feature=gene;description=rifin;]
Pf3D7_03_v3	47528	49978	Pf3D7_03_v3-1025204-1027621-rev__Pf3D7_03_v3-47528-49978-for	2450	+	[ID=PF3D7_0300300;feature=gene;description="erythrocyte membrane protein 1 (PfEMP1), exon 2, pseudogene";],[ID=PF3D7_0300200;feature=gene;description=rifin;]
Pf3D7_06_v3	15698	18147	Pf3D7_06_v3-15698-18147-rev__Pf3D7_10_v3-1637440-1639884-for	2449	-	[ID=PF3D7_0600300;feature=gene;description=rifin;]
Pf3D7_03_v3	1028786	1031234	Pf3D7_03_v3-1028786-1031234-rev__Pf3D7_10_v3-35736-38192-for	2448	-	[ID=PF3D7_0324800;feature=gene;description=rifin;],[ID=PF3D7_0324900;feature=gene;description=erythrocyte membrane protein 1, PfEMP1;]
Pf3D7_13_v3	2879260	2881708	Pf3D7_13_v3-2879260-2881708-rev__Pf3D7_14_v3-8422-10867-for	2448	-	[ID=PF3D7_1373400;feature=gene;description=rifin;]
Pf3D7_12_v3	2268578	2271025	Pf3D7_08_v3-1469111-1471548-for__Pf3D7_12_v3-2268578-2271025-for	2447	+
Pf3D7_01_v3	79449	81895	Pf3D7_01_v3-79449-81895-for__Pf3D7_12_v3-41497-43930-for	2446	+	[ID=PF3D7_0101500;feature=gene;description="erythrocyte membrane protein 1 (PfEMP1), exon 2, pseudogene";],[ID=PF3D7_0101600;feature=gene;description=rifin;]
Pf3D7_02_v3	914326	916771	Pf3D7_01_v3-605400-607800-for__Pf3D7_02_v3-914326-916771-for	2445	+	[ID=PF3D7_0223400;feature=gene;description=rifin;],[ID=PF3D7_0223500;feature=gene;description=erythrocyte membrane protein 1, PfEMP1;]
Pf3D7_02_v3	914326	916771	Pf3D7_02_v3-914326-916771-rev__Pf3D7_03_v3-44071-46499-for	2445	-	[ID=PF3D7_0223400;feature=gene;description=rifin;],[ID=PF3D7_0223500;feature=gene;description=erythrocyte membrane protein 1, PfEMP1;]
Pf3D7_04_v3	1196968	1199413	Pf3D7_04_v3-1196968-1199413-rev__Pf3D7_12_v3-819-3231-for	2445	-
Pf3D7_09_v3	1493546	1495991	Pf3D7_09_v3-1493546-1495991-rev__Pf3D7_11_v3-64430-66847-for	2445	-	[ID=PF3D7_0937800;feature=gene;description=erythrocyte membrane protein 1, PfEMP1;],[ID=PF3D7_0937700;feature=gene;description=rifin;]
Pf3D7_14_v3	8422	10867	Pf3D7_13_v3-2879260-2881708-rev__Pf3D7_14_v3-8422-10867-for	2445	+	[ID=PF3D7_1400200;feature=gene;description=rifin;]
Pf3D7_10_v3	1637440	1639884	Pf3D7_06_v3-15698-18147-rev__Pf3D7_10_v3-1637440-1639884-for	2444	+	[ID=PF3D7_1041200;feature=gene;description=rifin;]
Pf3D7_12_v3	2239312	2241753	Pf3D7_04_v3-1171079-1173535-for__Pf3D7_12_v3-2239312-2241753-for	2441	+	[ID=PF3D7_1255100;feature=gene;description=rifin;],[ID=PF3D7_1255200;feature=gene;description=erythrocyte membrane protein 1, PfEMP1;]
Pf3D7_05_v3	5332	7773	Pf3D7_05_v3-5332-7773-for__Pf3D7_12_v3-5140-7580-for	2441	+
Pf3D7_13_v3	5767	8208	Pf3D7_12_v3-5140-7580-for__Pf3D7_13_v3-5767-8208-for	2441	+
Pf3D7_01_v3	79479	81919	Pf3D7_01_v3-605376-607802-for__Pf3D7_01_v3-79479-81919-rev	2440	-	[ID=PF3D7_0101500;feature=gene;description="erythrocyte membrane protein 1 (PfEMP1), exon 2, pseudogene";],[ID=PF3D7_0101600;feature=gene;description=rifin;]
Pf3D7_01_v3	79479	81919	Pf3D7_01_v3-605376-607802-rev__Pf3D7_01_v3-79479-81919-for	2440	+	[ID=PF3D7_0101500;feature=gene;description="erythrocyte membrane protein 1 (PfEMP1), exon 2, pseudogene";],[ID=PF3D7_0101600;feature=gene;description=rifin;]
Pf3D7_12_v3	5140	7580	Pf3D7_05_v3-5332-7773-for__Pf3D7_12_v3-5140-7580-for	2440	+
Pf3D7_12_v3	5140	7580	Pf3D7_12_v3-5140-7580-for__Pf3D7_13_v3-5767-8208-for	2440	+
Pf3D7_01_v3	39740	42179	Pf3D7_01_v3-39740-42179-rev__Pf3D7_14_v3-3274291-3276679-for	2439	-	[ID=PF3D7_0100200;feature=gene;description=rifin;]
Pf3D7_06_v3	1372719	1375158	Pf3D7_06_v3-1372719-1375158-rev__Pf3D7_09_v3-27538-29938-for	2439	-	[ID=PF3D7_0632700;feature=gene;description=rifin;],[ID=PF3D7_0632800;feature=gene;description=erythrocyte membrane protein 1, PfEMP1;]
Pf3D7_03_v3	1028794	1031232	Pf3D7_03_v3-1028794-1031232-for__Pf3D7_03_v3-44071-46503-rev	2438	+	[ID=PF3D7_0324800;feature=gene;description=rifin;],[ID=PF3D7_0324900;feature=gene;description=erythrocyte membrane protein 1, PfEMP1;]
Pf3D7_03_v3	1028794	1031232	Pf3D7_03_v3-1028794-1031232-rev__Pf3D7_03_v3-44071-46503-for	2438	-	[ID=PF3D7_0324800;feature=gene;description=rifin;],[ID=PF3D7_0324900;feature=gene;description=erythrocyte membrane protein 1, PfEMP1;]
Pf3D7_03_v3	1028794	1031232	Pf3D7_03_v3-1028794-1031232-rev__Pf3D7_04_v3-39743-42166-for	2438	-	[ID=PF3D7_0324800;feature=gene;description=rifin;],[ID=PF3D7_0324900;feature=gene;description=erythrocyte membrane protein 1, PfEMP1;]
Pf3D7_02_v3	911504	913941	Pf3D7_02_v3-911504-913941-for__Pf3D7_10_v3-1637440-1639866-for	2437	+	[ID=PF3D7_0223400;feature=gene;description=rifin;]
Pf3D7_08_v3	1469111	1471548	Pf3D7_08_v3-1469111-1471548-for__Pf3D7_12_v3-2268578-2271025-for	2437	+
Pf3D7_06_v3	28139	30573	Pf3D7_03_v3-1029303-1031792-for__Pf3D7_06_v3-28139-30573-for	2434	+	[ID=PF3D7_0600600;feature=gene;description="erythrocyte membrane protein 1 (PfEMP1), exon 2";]
Pf3D7_12_v3	41497	43930	Pf3D7_01_v3-79449-81895-for__Pf3D7_12_v3-41497-43930-for	2433	+	[ID=PF3D7_1200400;feature=gene;description=erythrocyte membrane protein 1, PfEMP1;],[ID=PF3D7_1200500;feature=gene;description=rifin;]
Pf3D7_03_v3	44071	46503	Pf3D7_03_v3-1028794-1031232-for__Pf3D7_03_v3-44071-46503-rev	2432	-	[ID=PF3D7_0300100;feature=gene;description=erythrocyte membrane protein 1, PfEMP1;],[ID=PF3D7_0300200;feature=gene;description=rifin;]
Pf3D7_03_v3	44071	46503	Pf3D7_03_v3-1028794-1031232-rev__Pf3D7_03_v3-44071-46503-for	2432	+	[ID=PF3D7_0300100;feature=gene;description=erythrocyte membrane protein 1, PfEMP1;],[ID=PF3D7_0300200;feature=gene;description=rifin;]
Pf3D7_03_v3	44071	46499	Pf3D7_02_v3-914326-916771-rev__Pf3D7_03_v3-44071-46499-for	2428	+	[ID=PF3D7_0300100;feature=gene;description=erythrocyte membrane protein 1, PfEMP1;],[ID=PF3D7_0300200;feature=gene;description=rifin;]
Pf3D7_10_v3	5997	8424	Pf3D7_10_v3-5997-8424-for__Pf3D7_12_v3-5153-7580-for	2427	+
Pf3D7_12_v3	5153	7580	Pf3D7_10_v3-5997-8424-for__Pf3D7_12_v3-5153-7580-for	2427	+
Pf3D7_01_v3	605376	607802	Pf3D7_01_v3-605376-607802-for__Pf3D7_01_v3-79479-81919-rev	2426	+	[ID=PF3D7_0115700;feature=gene;description=erythrocyte membrane protein 1, PfEMP1;],[ID=PF3D7_0115600;feature=gene;description=rifin;]
Pf3D7_01_v3	605376	607802	Pf3D7_01_v3-605376-607802-rev__Pf3D7_01_v3-79479-81919-for	2426	-	[ID=PF3D7_0115700;feature=gene;description=erythrocyte membrane protein 1, PfEMP1;],[ID=PF3D7_0115600;feature=gene;description=rifin;]
Pf3D7_01_v3	79451	81877	Pf3D7_01_v3-79451-81877-rev__Pf3D7_02_v3-914344-916801-for	2426	-	[ID=PF3D7_0101500;feature=gene;description="erythrocyte membrane protein 1 (PfEMP1), exon 2, pseudogene";],[ID=PF3D7_0101600;feature=gene;description=rifin;]
Pf3D7_10_v3	1637440	1639866	Pf3D7_02_v3-911504-913941-for__Pf3D7_10_v3-1637440-1639866-for	2426	+	[ID=PF3D7_1041200;feature=gene;description=rifin;]
Pf3D7_10_v3	1637440	1639866	Pf3D7_04_v3-1168262-1170668-for__Pf3D7_10_v3-1637440-1639866-for	2426	+	[ID=PF3D7_1041200;feature=gene;description=rifin;]
Pf3D7_13_v3	51776	54201	Pf3D7_04_v3-60804-63184-rev__Pf3D7_13_v3-51776-54201-for	2425	+	[ID=PF3D7_1300500;feature=gene;description=rifin;],[ID=PF3D7_1300600;feature=gene;description=rifin;]
Pf3D7_05_v3	995	3419	Pf3D7_05_v3-995-3419-rev__Pf3D7_10_v3-1683627-1686034-for	2424	-
Pf3D7_04_v3	39743	42166	Pf3D7_03_v3-1028794-1031232-rev__Pf3D7_04_v3-39743-42166-for	2423	+	[ID=PF3D7_0400200;feature=gene;description="erythrocyte membrane protein 1 (PfEMP1), exon 2, pseudogene";],[ID=PF3D7_0400300;feature=gene;description=rifin;]
Pf3D7_02_v3	914349	916771	Pf3D7_02_v3-914349-916771-rev__Pf3D7_04_v3-39743-42139-for	2422	-	[ID=PF3D7_0223400;feature=gene;description=rifin;],[ID=PF3D7_0223500;feature=gene;description=erythrocyte membrane protein 1, PfEMP1;]
Pf3D7_04_v3	39741	42162	Pf3D7_01_v3-79479-81895-for__Pf3D7_04_v3-39741-42162-for	2421	+	[ID=PF3D7_0400200;feature=gene;description="erythrocyte membrane protein 1 (PfEMP1), exon 2, pseudogene";],[ID=PF3D7_0400300;feature=gene;description=rifin;]
Pf3D7_08_v3	1430326	1432746	Pf3D7_03_v3-1025202-1027621-for__Pf3D7_08_v3-1430326-1432746-for	2420	+	[ID=PF3D7_0833400;feature=gene;description=rifin;],[ID=PF3D7_0833300;feature=gene;description="erythrocyte membrane protein 1 (PfEMP1), exon 2, pseudogene";]
Pf3D7_01_v3	40156	42575	Pf3D7_01_v3-40156-42575-rev__Pf3D7_03_v3-1025202-1027621-for	2419	-	[ID=PF3D7_0100200;feature=gene;description=rifin;],[ID=PF3D7_0100300;feature=gene;description=erythrocyte membrane protein 1, PfEMP1;]
Pf3D7_03_v3	1025202	1027621	Pf3D7_01_v3-40156-42575-rev__Pf3D7_03_v3-1025202-1027621-for	2419	+	[ID=PF3D7_0324800;feature=gene;description=rifin;],[ID=PF3D7_0324700;feature=gene;description="erythrocyte membrane protein 1 (PfEMP1), exon 2, pseudogene";]
Pf3D7_03_v3	1025202	1027621	Pf3D7_03_v3-1025202-1027621-for__Pf3D7_04_v3-1167633-1170030-for	2419	+	[ID=PF3D7_0324800;feature=gene;description=rifin;],[ID=PF3D7_0324700;feature=gene;description="erythrocyte membrane protein 1 (PfEMP1), exon 2, pseudogene";]
Pf3D7_03_v3	1025202	1027621	Pf3D7_03_v3-1025202-1027621-for__Pf3D7_08_v3-1430326-1432746-for	2419	+	[ID=PF3D7_0324800;feature=gene;description=rifin;],[ID=PF3D7_0324700;feature=gene;description="erythrocyte membrane protein 1 (PfEMP1), exon 2, pseudogene";]
Pf3D7_04_v3	43323	45742	Pf3D7_03_v3-1025217-1027621-rev__Pf3D7_04_v3-43323-45742-for	2419	+	[ID=PF3D7_0400400;feature=gene;description=erythrocyte membrane protein 1, PfEMP1;],[ID=PF3D7_0400300;feature=gene;description=rifin;]
Pf3D7_13_v3	2922817	2925236	Pf3D7_03_v3-249-2741-rev__Pf3D7_13_v3-2922817-2925236-for	2419	+
Pf3D7_09_v3	1493573	1495991	Pf3D7_07_v3-53224-55696-rev__Pf3D7_09_v3-1493573-1495991-for	2418	+	[ID=PF3D7_0937800;feature=gene;description=erythrocyte membrane protein 1, PfEMP1;],[ID=PF3D7_0937700;feature=gene;description=rifin;]
Pf3D7_03_v3	1025204	1027621	Pf3D7_03_v3-1025204-1027621-for__Pf3D7_03_v3-47528-49978-rev	2417	+	[ID=PF3D7_0324800;feature=gene;description=rifin;],[ID=PF3D7_0324700;feature=gene;description="erythrocyte membrane protein 1 (PfEMP1), exon 2, pseudogene";]
Pf3D7_03_v3	1025204	1027621	Pf3D7_03_v3-1025204-1027621-rev__Pf3D7_03_v3-47528-49978-for	2417	-	[ID=PF3D7_0324800;feature=gene;description=rifin;],[ID=PF3D7_0324700;feature=gene;description="erythrocyte membrane protein 1 (PfEMP1), exon 2, pseudogene";]
Pf3D7_11_v3	64430	66847	Pf3D7_09_v3-1493546-1495991-rev__Pf3D7_11_v3-64430-66847-for	2417	+	[ID=PF3D7_1101000;feature=gene;description="erythrocyte membrane protein 1 (PfEMP1), pseudogene";],[ID=PF3D7_1101100;feature=gene;description=rifin;]
Pf3D7_01_v3	79479	81895	Pf3D7_01_v3-79479-81895-for__Pf3D7_04_v3-39741-42162-for	2416	+	[ID=PF3D7_0101500;feature=gene;description="erythrocyte membrane protein 1 (PfEMP1), exon 2, pseudogene";],[ID=PF3D7_0101600;feature=gene;description=rifin;]
Pf3D7_08_v3	1469111	1471527	Pf3D7_08_v3-1469111-1471527-rev__Pf3D7_11_v3-1435-3850-for	2416	-
Pf3D7_11_v3	1435	3850	Pf3D7_08_v3-1469111-1471527-rev__Pf3D7_11_v3-1435-3850-for	2415	+
Pf3D7_01_v3	605388	607802	Pf3D7_01_v3-605388-607802-rev__Pf3D7_11_v3-64430-66828-for	2414	-	[ID=PF3D7_0115700;feature=gene;description=erythrocyte membrane protein 1, PfEMP1;],[ID=PF3D7_0115600;feature=gene;description=rifin;]
Pf3D7_06_v3	28139	30552	Pf3D7_06_v3-28139-30552-for__Pf3D7_10_v3-1640888-1643344-for	2413	+	[ID=PF3D7_0600600;feature=gene;description="erythrocyte membrane protein 1 (PfEMP1), exon 2";]
Pf3D7_12_v3	819	3231	Pf3D7_04_v3-1196968-1199413-rev__Pf3D7_12_v3-819-3231-for	2412	+
Pf3D7_01_v3	79479	81887	Pf3D7_01_v3-79479-81887-rev__Pf3D7_09_v3-1493585-1495991-for	2408	-	[ID=PF3D7_0101500;feature=gene;description="erythrocyte membrane protein 1 (PfEMP1), exon 2, pseudogene";],[ID=PF3D7_0101600;feature=gene;description=rifin;]
Pf3D7_13_v3	31214	33621	Pf3D7_01_v3-39537-41943-for__Pf3D7_13_v3-31214-33621-for	2407	+	[ID=PF3D7_1300200;feature=gene;description=rifin;]
Pf3D7_10_v3	1683627	1686034	Pf3D7_05_v3-995-3419-rev__Pf3D7_10_v3-1683627-1686034-for	2407	+
Pf3D7_13_v3	31214	33621	Pf3D7_06_v3-15749-18147-for__Pf3D7_13_v3-31214-33621-for	2407	+	[ID=PF3D7_1300200;feature=gene;description=rifin;]
Pf3D7_01_v3	39537	41943	Pf3D7_01_v3-39537-41943-for__Pf3D7_13_v3-31214-33621-for	2406	+	[ID=PF3D7_0100200;feature=gene;description=rifin;]
Pf3D7_09_v3	1493585	1495991	Pf3D7_01_v3-79479-81887-rev__Pf3D7_09_v3-1493585-1495991-for	2406	+	[ID=PF3D7_0937800;feature=gene;description=erythrocyte membrane protein 1, PfEMP1;],[ID=PF3D7_0937700;feature=gene;description=rifin;]
Pf3D7_04_v3	1168262	1170668	Pf3D7_04_v3-1168262-1170668-for__Pf3D7_10_v3-1637440-1639866-for	2406	+	[ID=PF3D7_0425900;feature=gene;description=rifin;]
Pf3D7_03_v3	1025217	1027621	Pf3D7_03_v3-1025217-1027621-rev__Pf3D7_04_v3-43323-45742-for	2404	-	[ID=PF3D7_0324800;feature=gene;description=rifin;],[ID=PF3D7_0324700;feature=gene;description="erythrocyte membrane protein 1 (PfEMP1), exon 2, pseudogene";]
Pf3D7_06_v3	1351889	1354291	Pf3D7_06_v3-1351889-1354291-rev__Pf3D7_13_v3-28438-30802-for	2402	-	[ID=PF3D7_0632500;feature=gene;description=erythrocyte membrane protein 1, PfEMP1;],[ID=PF3D7_0632400;feature=gene;description=rifin;]
Pf3D7_09_v3	1490628	1493030	Pf3D7_06_v3-1369753-1372153-for__Pf3D7_09_v3-1490628-1493030-for	2402	+	[ID=PF3D7_0937700;feature=gene;description=rifin;]
Pf3D7_09_v3	1493584	1495986	Pf3D7_09_v3-1493584-1495986-rev__Pf3D7_12_v3-41532-43923-for	2402	-	[ID=PF3D7_0937800;feature=gene;description=erythrocyte membrane protein 1, PfEMP1;],[ID=PF3D7_0937700;feature=gene;description=rifin;]
Pf3D7_12_v3	41497	43898	Pf3D7_11_v3-64400-66784-for__Pf3D7_12_v3-41497-43898-for	2401	+	[ID=PF3D7_1200400;feature=gene;description=erythrocyte membrane protein 1, PfEMP1;],[ID=PF3D7_1200500;feature=gene;description=rifin;]
Pf3D7_01_v3	605400	607800	Pf3D7_01_v3-605400-607800-for__Pf3D7_02_v3-914326-916771-for	2400	+	[ID=PF3D7_0115700;feature=gene;description=erythrocyte membrane protein 1, PfEMP1;],[ID=PF3D7_0115600;feature=gene;description=rifin;]
Pf3D7_02_v3	6303	8703	Pf3D7_02_v3-6303-8703-rev__Pf3D7_06_v3-1407527-1409927-for	2400	-
Pf3D7_06_v3	1407527	1409927	Pf3D7_02_v3-6303-8703-rev__Pf3D7_06_v3-1407527-1409927-for	2400	+
Pf3D7_02_v3	939372	941772	Pf3D7_02_v3-939372-941772-for__Pf3D7_06_v3-1407527-1409927-for	2400	+
Pf3D7_06_v3	1407527	1409927	Pf3D7_02_v3-939372-941772-for__Pf3D7_06_v3-1407527-1409927-for	2400	+
Pf3D7_06_v3	1369753	1372153	Pf3D7_06_v3-1369753-1372153-for__Pf3D7_09_v3-1490628-1493030-for	2400	+	[ID=PF3D7_0632700;feature=gene;description=rifin;]
Pf3D7_09_v3	27538	29938	Pf3D7_06_v3-1372719-1375158-rev__Pf3D7_09_v3-27538-29938-for	2400	+	[ID=PF3D7_0900100;feature=gene;description=erythrocyte membrane protein 1, PfEMP1;],[ID=PF3D7_0900200;feature=gene;description=rifin;]
Pf3D7_11_v3	64430	66828	Pf3D7_01_v3-605388-607802-rev__Pf3D7_11_v3-64430-66828-for	2398	+	[ID=PF3D7_1101000;feature=gene;description="erythrocyte membrane protein 1 (PfEMP1), pseudogene";],[ID=PF3D7_1101100;feature=gene;description=rifin;]
Pf3D7_06_v3	15749	18147	Pf3D7_06_v3-15749-18147-for__Pf3D7_13_v3-31214-33621-for	2398	+	[ID=PF3D7_0600300;feature=gene;description=rifin;]
Pf3D7_03_v3	1028816	1031213	Pf3D7_01_v3-79499-81877-rev__Pf3D7_03_v3-1028816-1031213-for	2397	+	[ID=PF3D7_0324800;feature=gene;description=rifin;],[ID=PF3D7_0324900;feature=gene;description=erythrocyte membrane protein 1, PfEMP1;]
Pf3D7_04_v3	1167633	1170030	Pf3D7_03_v3-1025202-1027621-for__Pf3D7_04_v3-1167633-1170030-for	2397	+	[ID=PF3D7_0425900;feature=gene;description=rifin;],[ID=PF3D7_0425800;feature=gene;description=erythrocyte membrane protein 1, PfEMP1;]
Pf3D7_09_v3	30494	32891	Pf3D7_04_v3-1168262-1170633-rev__Pf3D7_09_v3-30494-32891-for	2397	+	[ID=PF3D7_0900200;feature=gene;description=rifin;]
Pf3D7_09_v3	30494	32891	Pf3D7_06_v3-15753-18147-for__Pf3D7_09_v3-30494-32891-for	2397	+	[ID=PF3D7_0900200;feature=gene;description=rifin;]
Pf3D7_04_v3	39743	42139	Pf3D7_02_v3-914349-916771-rev__Pf3D7_04_v3-39743-42139-for	2396	+	[ID=PF3D7_0400200;feature=gene;description="erythrocyte membrane protein 1 (PfEMP1), exon 2, pseudogene";],[ID=PF3D7_0400300;feature=gene;description=rifin;]
Pf3D7_06_v3	15753	18147	Pf3D7_06_v3-15753-18147-for__Pf3D7_09_v3-30494-32891-for	2394	+	[ID=PF3D7_0600300;feature=gene;description=rifin;]
Pf3D7_06_v3	1343250	1345643	Pf3D7_06_v3-1343250-1345643-rev__Pf3D7_09_v3-64236-66692-for	2393	-
Pf3D7_02_v3	911504	913896	Pf3D7_02_v3-911504-913896-rev__Pf3D7_10_v3-38751-41129-for	2392	-	[ID=PF3D7_0223400;feature=gene;description=rifin;]
Pf3D7_07_v3	1415532	1417924	Pf3D7_07_v3-1415532-1417924-for__Pf3D7_08_v3-1433781-1436133-for	2392	+	[ID=PF3D7_0733000;feature=gene;description=erythrocyte membrane protein 1, PfEMP1;],[ID=PF3D7_0732900;feature=gene;description=rifin;]
Pf3D7_12_v3	41532	43923	Pf3D7_09_v3-1493584-1495986-rev__Pf3D7_12_v3-41532-43923-for	2391	+	[ID=PF3D7_1200400;feature=gene;description=erythrocyte membrane protein 1, PfEMP1;],[ID=PF3D7_1200500;feature=gene;description=rifin;]
Pf3D7_02_v3	2468	4858	Pf3D7_02_v3-2468-4858-for__Pf3D7_10_v3-1429-3819-for	2390	+
Pf3D7_10_v3	1429	3819	Pf3D7_02_v3-2468-4858-for__Pf3D7_10_v3-1429-3819-for	2390	+
Pf3D7_02_v3	2468	4858	Pf3D7_02_v3-2468-4858-rev__Pf3D7_13_v3-2917501-2919891-for	2390	-
Pf3D7_13_v3	2917501	2919891	Pf3D7_02_v3-2468-4858-rev__Pf3D7_13_v3-2917501-2919891-for	2390	+
Pf3D7_04_v3	39741	42130	Pf3D7_04_v3-39741-42130-for__Pf3D7_11_v3-64430-66784-for	2389	+	[ID=PF3D7_0400200;feature=gene;description="erythrocyte membrane protein 1 (PfEMP1), exon 2, pseudogene";],[ID=PF3D7_0400300;feature=gene;description=rifin;]
Pf3D7_14_v3	3274291	3276679	Pf3D7_01_v3-39740-42179-rev__Pf3D7_14_v3-3274291-3276679-for	2388	+	[ID=PF3D7_1479700;feature=gene;description=rifin;]
Pf3D7_13_v3	31234	33621	Pf3D7_01_v3-602439-604805-rev__Pf3D7_13_v3-31234-33621-for	2387	+	[ID=PF3D7_1300200;feature=gene;description=rifin;]
Pf3D7_02_v3	911504	913891	Pf3D7_02_v3-911504-913891-rev__Pf3D7_09_v3-30509-32891-for	2387	-	[ID=PF3D7_0223400;feature=gene;description=rifin;]
Pf3D7_01_v3	605277	607663	Pf3D7_01_v3-605277-607663-for__Pf3D7_06_v3-1372607-1375082-for	2386	+	[ID=PF3D7_0115700;feature=gene;description=erythrocyte membrane protein 1, PfEMP1;],[ID=PF3D7_0115600;feature=gene;description=rifin;]
Pf3D7_14_v3	4922	7308	Pf3D7_08_v3-1433831-1436208-rev__Pf3D7_14_v3-4922-7308-for	2386	+	[ID=PF3D7_1400100;feature=gene;description="erythrocyte membrane protein 1 (PfEMP1), pseudogene";],[ID=PF3D7_1400200;feature=gene;description=rifin;]
Pf3D7_11_v3	64400	66784	Pf3D7_11_v3-64400-66784-for__Pf3D7_12_v3-41497-43898-for	2384	+	[ID=PF3D7_1101000;feature=gene;description="erythrocyte membrane protein 1 (PfEMP1), pseudogene";],[ID=PF3D7_1101100;feature=gene;description=rifin;]
Pf3D7_01_v3	39796	42179	Pf3D7_01_v3-39796-42179-for__Pf3D7_12_v3-27279-29630-for	2383	+	[ID=PF3D7_0100200;feature=gene;description=rifin;]
Pf3D7_09_v3	30509	32891	Pf3D7_02_v3-911504-913891-rev__Pf3D7_09_v3-30509-32891-for	2382	+	[ID=PF3D7_0900200;feature=gene;description=rifin;]
Pf3D7_08_v3	1469278	1471660	Pf3D7_08_v3-1469278-1471660-rev__Pf3D7_08_v3-839-3206-for	2382	-
Pf3D7_02_v3	49606	51987	Pf3D7_02_v3-49606-51987-rev__Pf3D7_07_v3-1388891-1391251-for	2381	-	[ID=PF3D7_0200700;feature=gene;description=rifin;],[ID=PF3D7_0200800;feature=gene;description="erythrocyte membrane protein 1 (PfEMP1), exon 2, pseudogene";]
Pf3D7_04_v3	60804	63184	Pf3D7_04_v3-60804-63184-rev__Pf3D7_13_v3-51776-54201-for	2380	-	[ID=PF3D7_0400600;feature=gene;description="erythrocyte membrane protein 1 (PfEMP1), exon 1, pseudogene";],[ID=PF3D7_0400500;feature=gene;description=rifin;],[ID=PF3D7_0400700;feature=gene;description=rifin;]
Pf3D7_06_v3	1351911	1354291	Pf3D7_06_v3-1351911-1354291-for__Pf3D7_12_v3-2239241-2241613-for	2380	+	[ID=PF3D7_0632500;feature=gene;description=erythrocyte membrane protein 1, PfEMP1;],[ID=PF3D7_0632400;feature=gene;description=rifin;]
Pf3D7_07_v3	1439029	1441409	Pf3D7_07_v3-1439029-1441409-rev__Pf3D7_10_v3-5997-8377-for	2380	-
Pf3D7_10_v3	5997	8377	Pf3D7_07_v3-1439029-1441409-rev__Pf3D7_10_v3-5997-8377-for	2380	+
Pf3D7_01_v3	79499	81877	Pf3D7_01_v3-79499-81877-rev__Pf3D7_03_v3-1028816-1031213-for	2378	-	[ID=PF3D7_0101500;feature=gene;description="erythrocyte membrane protein 1 (PfEMP1), exon 2, pseudogene";],[ID=PF3D7_0101600;feature=gene;description=rifin;]
Pf3D7_10_v3	38751	41129	Pf3D7_02_v3-911504-913896-rev__Pf3D7_10_v3-38751-41129-for	2378	+	[ID=PF3D7_1000200;feature=gene;description=rifin;]
Pf3D7_07_v3	1415548	1417926	Pf3D7_06_v3-1351952-1354293-for__Pf3D7_07_v3-1415548-1417926-for	2378	+	[ID=PF3D7_0733000;feature=gene;description=erythrocyte membrane protein 1, PfEMP1;],[ID=PF3D7_0732900;feature=gene;description=rifin;]
Pf3D7_07_v3	1412693	1415071	Pf3D7_06_v3-1369753-1372129-for__Pf3D7_07_v3-1412693-1415071-for	2378	+	[ID=PF3D7_0732900;feature=gene;description=rifin;]
Pf3D7_07_v3	1412693	1415071	Pf3D7_07_v3-1412693-1415071-rev__Pf3D7_12_v3-27049-29417-for	2378	-	[ID=PF3D7_0732900;feature=gene;description=rifin;]
Pf3D7_08_v3	1469118	1471496	Pf3D7_08_v3-1469118-1471496-rev__Pf3D7_12_v3-819-3163-for	2378	-
Pf3D7_08_v3	1433831	1436208	Pf3D7_08_v3-1433831-1436208-rev__Pf3D7_14_v3-4922-7308-for	2377	-	[ID=PF3D7_0833400;feature=gene;description=rifin;],[ID=PF3D7_0833500;feature=gene;description=erythrocyte membrane protein 1, PfEMP1;]
Pf3D7_06_v3	1369753	1372129	Pf3D7_06_v3-1369753-1372129-for__Pf3D7_07_v3-1412693-1415071-for	2376	+	[ID=PF3D7_0632700;feature=gene;description=rifin;]
Pf3D7_07_v3	1415548	1417924	Pf3D7_07_v3-1415548-1417924-rev__Pf3D7_13_v3-28438-30739-for	2376	-	[ID=PF3D7_0733000;feature=gene;description=erythrocyte membrane protein 1, PfEMP1;],[ID=PF3D7_0732900;feature=gene;description=rifin;]
Pf3D7_12_v3	2239241	2241613	Pf3D7_06_v3-1351911-1354291-for__Pf3D7_12_v3-2239241-2241613-for	2372	+	[ID=PF3D7_1255100;feature=gene;description=rifin;],[ID=PF3D7_1255200;feature=gene;description=erythrocyte membrane protein 1, PfEMP1;]
Pf3D7_04_v3	1168262	1170633	Pf3D7_04_v3-1168262-1170633-rev__Pf3D7_09_v3-30494-32891-for	2371	-	[ID=PF3D7_0425900;feature=gene;description=rifin;]
Pf3D7_07_v3	1415553	1417924	Pf3D7_07_v3-1415553-1417924-for__Pf3D7_12_v3-2239287-2241613-for	2371	+	[ID=PF3D7_0733000;feature=gene;description=erythrocyte membrane protein 1, PfEMP1;],[ID=PF3D7_0732900;feature=gene;description=rifin;]
Pf3D7_12_v3	27049	29417	Pf3D7_07_v3-1412693-1415071-rev__Pf3D7_12_v3-27049-29417-for	2368	+	[ID=PF3D7_1200200;feature=gene;description=rifin;]
Pf3D7_08_v3	839	3206	Pf3D7_08_v3-1469278-1471660-rev__Pf3D7_08_v3-839-3206-for	2367	+
Pf3D7_01_v3	602439	604805	Pf3D7_01_v3-602439-604805-rev__Pf3D7_13_v3-31234-33621-for	2366	-	[ID=PF3D7_0115600;feature=gene;description=rifin;]
Pf3D7_07_v3	1412693	1415058	Pf3D7_07_v3-1412693-1415058-rev__Pf3D7_13_v3-31256-33621-for	2365	-	[ID=PF3D7_0732900;feature=gene;description=rifin;]
Pf3D7_13_v3	31256	33621	Pf3D7_07_v3-1412693-1415058-rev__Pf3D7_13_v3-31256-33621-for	2365	+	[ID=PF3D7_1300200;feature=gene;description=rifin;]
Pf3D7_01_v3	601848	604212	Pf3D7_01_v3-601848-604212-for__Pf3D7_03_v3-1025267-1027621-for	2364	+	[ID=PF3D7_0115500;feature=gene;description="erythrocyte membrane protein 1 (PfEMP1), pseudogene";],[ID=PF3D7_0115600;feature=gene;description=rifin;]
Pf3D7_13_v3	28438	30802	Pf3D7_06_v3-1351889-1354291-rev__Pf3D7_13_v3-28438-30802-for	2364	+	[ID=PF3D7_1300100;feature=gene;description=erythrocyte membrane protein 1, PfEMP1;],[ID=PF3D7_1300200;feature=gene;description=rifin;]
Pf3D7_12_v3	41532	43895	Pf3D7_01_v3-605435-607797-rev__Pf3D7_12_v3-41532-43895-for	2363	+	[ID=PF3D7_1200400;feature=gene;description=erythrocyte membrane protein 1, PfEMP1;],[ID=PF3D7_1200500;feature=gene;description=rifin;]
Pf3D7_01_v3	605435	607797	Pf3D7_01_v3-605435-607797-rev__Pf3D7_12_v3-41532-43895-for	2362	-	[ID=PF3D7_0115700;feature=gene;description=erythrocyte membrane protein 1, PfEMP1;],[ID=PF3D7_0115600;feature=gene;description=rifin;]
Pf3D7_04_v3	42745	45107	Pf3D7_04_v3-42745-45107-for__Pf3D7_07_v3-56152-58510-for	2362	+	[ID=PF3D7_0400300;feature=gene;description=rifin;]
Pf3D7_07_v3	1388891	1391251	Pf3D7_02_v3-49606-51987-rev__Pf3D7_07_v3-1388891-1391251-for	2360	+	[ID=PF3D7_0732200;feature=gene;description=rifin;],[ID=PF3D7_0732100;feature=gene;description="erythrocyte membrane protein 1 (PfEMP1), pseudogene";]
Pf3D7_07_v3	56152	58510	Pf3D7_04_v3-42745-45107-for__Pf3D7_07_v3-56152-58510-for	2358	+	[ID=PF3D7_0701100;feature=gene;description=rifin;]
Pf3D7_11_v3	42952	45310	Pf3D7_11_v3-42952-45310-for__Pf3D7_13_v3-45490-47837-for	2358	+	[ID=PF3D7_1100300;feature=gene;description=rifin;]
Pf3D7_09_v3	27538	29895	Pf3D7_02_v3-30824-33128-for__Pf3D7_09_v3-27538-29895-for	2357	+	[ID=PF3D7_0900100;feature=gene;description=erythrocyte membrane protein 1, PfEMP1;],[ID=PF3D7_0900200;feature=gene;description=rifin;]
Pf3D7_06_v3	1372726	1375082	Pf3D7_06_v3-1372726-1375082-rev__Pf3D7_07_v3-53362-55696-for	2356	-	[ID=PF3D7_0632700;feature=gene;description=rifin;],[ID=PF3D7_0632800;feature=gene;description=erythrocyte membrane protein 1, PfEMP1;]
Pf3D7_08_v3	1425278	1427634	Pf3D7_08_v3-1425278-1427634-rev__Pf3D7_11_v3-70581-72927-for	2356	-	[ID=PF3D7_0833200;feature=gene;description=rifin;]
Pf3D7_03_v3	1025267	1027621	Pf3D7_01_v3-601848-604212-for__Pf3D7_03_v3-1025267-1027621-for	2354	+	[ID=PF3D7_0324800;feature=gene;description=rifin;],[ID=PF3D7_0324700;feature=gene;description="erythrocyte membrane protein 1 (PfEMP1), exon 2, pseudogene";]
Pf3D7_11_v3	64430	66784	Pf3D7_04_v3-39741-42130-for__Pf3D7_11_v3-64430-66784-for	2354	+	[ID=PF3D7_1101000;feature=gene;description="erythrocyte membrane protein 1 (PfEMP1), pseudogene";],[ID=PF3D7_1101100;feature=gene;description=rifin;]
Pf3D7_04_v3	1153378	1155730	Pf3D7_04_v3-1153378-1155730-rev__Pf3D7_13_v3-45490-47837-for	2352	-	[ID=PF3D7_0425700;feature=gene;description=rifin;]
Pf3D7_08_v3	1433781	1436133	Pf3D7_07_v3-1415532-1417924-for__Pf3D7_08_v3-1433781-1436133-for	2352	+	[ID=PF3D7_0833400;feature=gene;description=rifin;],[ID=PF3D7_0833500;feature=gene;description=erythrocyte membrane protein 1, PfEMP1;]
Pf3D7_12_v3	27279	29630	Pf3D7_01_v3-39796-42179-for__Pf3D7_12_v3-27279-29630-for	2351	+	[ID=PF3D7_1200200;feature=gene;description=rifin;]
Pf3D7_07_v3	1386499	1388848	Pf3D7_07_v3-1386499-1388848-rev__Pf3D7_13_v3-60294-62641-for	2349	-	[ID=PF3D7_0732000;feature=gene;description=stevor;],[ID=PF3D7_0732100;feature=gene;description="erythrocyte membrane protein 1 (PfEMP1), pseudogene";]
Pf3D7_14_v3	8835	11184	Pf3D7_10_v3-39692-41983-for__Pf3D7_14_v3-8835-11184-for	2349	+	[ID=PF3D7_1400300;feature=gene;description=rifin;]
Pf3D7_13_v3	45490	47837	Pf3D7_04_v3-1153378-1155730-rev__Pf3D7_13_v3-45490-47837-for	2347	+	[ID=PF3D7_1300400;feature=gene;description=rifin;]
Pf3D7_04_v3	1171051	1173398	Pf3D7_04_v3-1171051-1173398-for__Pf3D7_06_v3-1351954-1354291-for	2347	+	[ID=PF3D7_0426000;feature=gene;description=erythrocyte membrane protein 1, PfEMP1;],[ID=PF3D7_0425900;feature=gene;description=rifin;]
Pf3D7_13_v3	45490	47837	Pf3D7_04_v3-57550-59890-for__Pf3D7_13_v3-45490-47837-for	2347	+	[ID=PF3D7_1300400;feature=gene;description=rifin;]
Pf3D7_13_v3	60294	62641	Pf3D7_07_v3-1386499-1388848-rev__Pf3D7_13_v3-60294-62641-for	2347	+	[ID=PF3D7_1300900;feature=gene;description=stevor;],[ID=PF3D7_1300800;feature=gene;description="erythrocyte membrane protein 1 (PfEMP1), pseudogene";]
Pf3D7_13_v3	45490	47837	Pf3D7_11_v3-42952-45310-for__Pf3D7_13_v3-45490-47837-for	2347	+	[ID=PF3D7_1300400;feature=gene;description=rifin;]
Pf3D7_07_v3	1415578	1417924	Pf3D7_04_v3-1171079-1173398-for__Pf3D7_07_v3-1415578-1417924-for	2346	+	[ID=PF3D7_0733000;feature=gene;description=erythrocyte membrane protein 1, PfEMP1;],[ID=PF3D7_0732900;feature=gene;description=rifin;]
Pf3D7_11_v3	70581	72927	Pf3D7_08_v3-1425278-1427634-rev__Pf3D7_11_v3-70581-72927-for	2346	+	[ID=PF3D7_1101200;feature=gene;description=rifin;]
Pf3D7_12_v3	819	3163	Pf3D7_08_v3-1469118-1471496-rev__Pf3D7_12_v3-819-3163-for	2344	+
Pf3D7_06_v3	1351952	1354293	Pf3D7_06_v3-1351952-1354293-for__Pf3D7_07_v3-1415548-1417926-for	2341	+	[ID=PF3D7_0632500;feature=gene;description=erythrocyte membrane protein 1, PfEMP1;],[ID=PF3D7_0632400;feature=gene;description=rifin;]
Pf3D7_08_v3	3284	5625	Pf3D7_08_v3-3284-5625-for__Pf3D7_11_v3-3761-6101-for	2341	+
Pf3D7_04_v3	57550	59890	Pf3D7_04_v3-57550-59890-for__Pf3D7_13_v3-45490-47837-for	2340	+	[ID=PF3D7_0400500;feature=gene;description=rifin;]
Pf3D7_11_v3	3761	6101	Pf3D7_08_v3-3284-5625-for__Pf3D7_11_v3-3761-6101-for	2340	+
Pf3D7_03_v3	1063231	1065570	Pf3D7_03_v3-1063231-1065570-for__Pf3D7_13_v3-2922667-2924967-for	2339	+
Pf3D7_06_v3	1351952	1354291	Pf3D7_06_v3-1351952-1354291-for__Pf3D7_08_v3-1433797-1436133-for	2339	+	[ID=PF3D7_0632500;feature=gene;description=erythrocyte membrane protein 1, PfEMP1;],[ID=PF3D7_0632400;feature=gene;description=rifin;]
Pf3D7_11_v3	64635	66974	Pf3D7_11_v3-64635-66974-for__Pf3D7_13_v3-28568-30893-for	2339	+	[ID=PF3D7_1101000;feature=gene;description="erythrocyte membrane protein 1 (PfEMP1), pseudogene";],[ID=PF3D7_1101100;feature=gene;description=rifin;]
Pf3D7_06_v3	1351954	1354291	Pf3D7_04_v3-1171051-1173398-for__Pf3D7_06_v3-1351954-1354291-for	2337	+	[ID=PF3D7_0632500;feature=gene;description=erythrocyte membrane protein 1, PfEMP1;],[ID=PF3D7_0632400;feature=gene;description=rifin;]
Pf3D7_08_v3	1433797	1436133	Pf3D7_06_v3-1351952-1354291-for__Pf3D7_08_v3-1433797-1436133-for	2336	+	[ID=PF3D7_0833400;feature=gene;description=rifin;],[ID=PF3D7_0833500;feature=gene;description=erythrocyte membrane protein 1, PfEMP1;]
Pf3D7_06_v3	1351956	1354291	Pf3D7_06_v3-1351956-1354291-for__Pf3D7_13_v3-2882825-2885131-for	2335	+	[ID=PF3D7_0632500;feature=gene;description=erythrocyte membrane protein 1, PfEMP1;],[ID=PF3D7_0632400;feature=gene;description=rifin;]
Pf3D7_07_v3	53362	55696	Pf3D7_06_v3-1372726-1375082-rev__Pf3D7_07_v3-53362-55696-for	2334	+	[ID=PF3D7_0701000;feature=gene;description="erythrocyte membrane protein 1 (PfEMP1), pseudogene";],[ID=PF3D7_0701100;feature=gene;description=rifin;]
Pf3D7_09_v3	30844	33176	Pf3D7_07_v3-56468-58796-for__Pf3D7_09_v3-30844-33176-for	2332	+	[ID=PF3D7_0900200;feature=gene;description=rifin;]
Pf3D7_14_v3	4997	7327	Pf3D7_06_v3-1351967-1354291-rev__Pf3D7_14_v3-4997-7327-for	2330	+	[ID=PF3D7_1400100;feature=gene;description="erythrocyte membrane protein 1 (PfEMP1), pseudogene";],[ID=PF3D7_1400200;feature=gene;description=rifin;]
Pf3D7_07_v3	56468	58796	Pf3D7_07_v3-56468-58796-for__Pf3D7_09_v3-30844-33176-for	2328	+	[ID=PF3D7_0701100;feature=gene;description=rifin;]
Pf3D7_07_v3	56468	58796	Pf3D7_07_v3-56468-58796-for__Pf3D7_12_v3-27374-29702-for	2328	+	[ID=PF3D7_0701100;feature=gene;description=rifin;]
Pf3D7_12_v3	27374	29702	Pf3D7_07_v3-56468-58796-for__Pf3D7_12_v3-27374-29702-for	2328	+	[ID=PF3D7_1200200;feature=gene;description=rifin;]
Pf3D7_07_v3	56514	58842	Pf3D7_07_v3-56514-58842-rev__Pf3D7_14_v3-3274171-3276492-for	2328	-	[ID=PF3D7_0701100;feature=gene;description=rifin;]
Pf3D7_09_v3	37480	39808	Pf3D7_09_v3-1481956-1484281-for__Pf3D7_09_v3-37480-39808-rev	2328	-	[ID=PF3D7_0900400;feature=gene;description=rifin;]
Pf3D7_09_v3	37480	39808	Pf3D7_09_v3-1481956-1484281-rev__Pf3D7_09_v3-37480-39808-for	2328	+	[ID=PF3D7_0900400;feature=gene;description=rifin;]
Pf3D7_12_v3	2239287	2241613	Pf3D7_07_v3-1415553-1417924-for__Pf3D7_12_v3-2239287-2241613-for	2326	+	[ID=PF3D7_1255100;feature=gene;description=rifin;],[ID=PF3D7_1255200;feature=gene;description=erythrocyte membrane protein 1, PfEMP1;]
Pf3D7_09_v3	1481956	1484281	Pf3D7_09_v3-1481956-1484281-for__Pf3D7_09_v3-37480-39808-rev	2325	+	[ID=PF3D7_0937500;feature=gene;description=rifin;]
Pf3D7_09_v3	1481956	1484281	Pf3D7_09_v3-1481956-1484281-rev__Pf3D7_09_v3-37480-39808-for	2325	-	[ID=PF3D7_0937500;feature=gene;description=rifin;]
Pf3D7_13_v3	28568	30893	Pf3D7_11_v3-64635-66974-for__Pf3D7_13_v3-28568-30893-for	2325	+	[ID=PF3D7_1300100;feature=gene;description=erythrocyte membrane protein 1, PfEMP1;],[ID=PF3D7_1300200;feature=gene;description=rifin;]
Pf3D7_08_v3	1469111	1471435	Pf3D7_05_v3-1035-3358-rev__Pf3D7_08_v3-1469111-1471435-for	2324	+
Pf3D7_06_v3	1351967	1354291	Pf3D7_06_v3-1351967-1354291-rev__Pf3D7_14_v3-4997-7327-for	2324	-	[ID=PF3D7_0632500;feature=gene;description=erythrocyte membrane protein 1, PfEMP1;],[ID=PF3D7_0632400;feature=gene;description=rifin;]
Pf3D7_07_v3	53351	55674	Pf3D7_02_v3-30883-33142-for__Pf3D7_07_v3-53351-55674-for	2323	+	[ID=PF3D7_0701000;feature=gene;description="erythrocyte membrane protein 1 (PfEMP1), pseudogene";],[ID=PF3D7_0701100;feature=gene;description=rifin;]
Pf3D7_02_v3	943219	945542	Pf3D7_02_v3-943219-945542-for__Pf3D7_13_v3-2917501-2919824-for	2323	+
Pf3D7_13_v3	2917501	2919824	Pf3D7_02_v3-943219-945542-for__Pf3D7_13_v3-2917501-2919824-for	2323	+
Pf3D7_05_v3	1035	3358	Pf3D7_05_v3-1035-3358-rev__Pf3D7_08_v3-1469111-1471435-for	2323	-
Pf3D7_14_v3	3274171	3276492	Pf3D7_07_v3-56514-58842-rev__Pf3D7_14_v3-3274171-3276492-for	2321	+	[ID=PF3D7_1479700;feature=gene;description=rifin;]
Pf3D7_04_v3	1171079	1173398	Pf3D7_04_v3-1171079-1173398-for__Pf3D7_07_v3-1415578-1417924-for	2319	+	[ID=PF3D7_0426000;feature=gene;description=erythrocyte membrane protein 1, PfEMP1;],[ID=PF3D7_0425900;feature=gene;description=rifin;]
Pf3D7_03_v3	43968	46286	Pf3D7_03_v3-43968-46286-for__Pf3D7_11_v3-64329-66618-for	2318	+	[ID=PF3D7_0300100;feature=gene;description=erythrocyte membrane protein 1, PfEMP1;]
Pf3D7_10_v3	35601	37915	Pf3D7_07_v3-53094-55396-for__Pf3D7_10_v3-35601-37915-for	2314	+	[ID=PF3D7_1000100;feature=gene;description=erythrocyte membrane protein 1, PfEMP1;]
Pf3D7_13_v3	2879584	2881897	Pf3D7_01_v3-39902-42179-rev__Pf3D7_13_v3-2879584-2881897-for	2313	+	[ID=PF3D7_1373400;feature=gene;description=rifin;]
Pf3D7_01_v3	85070	87383	Pf3D7_01_v3-85070-87383-for__Pf3D7_03_v3-50153-52457-for	2313	+	[ID=PF3D7_0101800;feature=gene;description=stevor;],[ID=PF3D7_0101700;feature=gene;description="erythrocyte membrane protein 1 (PfEMP1), exon 2, pseudogene";]
Pf3D7_07_v3	53362	55675	Pf3D7_07_v3-53362-55675-for__Pf3D7_09_v3-27611-29910-for	2313	+	[ID=PF3D7_0701000;feature=gene;description="erythrocyte membrane protein 1 (PfEMP1), pseudogene";],[ID=PF3D7_0701100;feature=gene;description=rifin;]
Pf3D7_12_v3	45216	47529	Pf3D7_09_v3-51080-53390-for__Pf3D7_12_v3-45216-47529-for	2313	+	[ID=PF3D7_1200600;feature=gene;description=erythrocyte membrane protein 1, PfEMP1;]
Pf3D7_13_v3	2922379	2924691	Pf3D7_03_v3-1063867-1066173-for__Pf3D7_13_v3-2922379-2924691-for	2312	+
Pf3D7_07_v3	1412434	1414746	Pf3D7_04_v3-1168004-1170292-for__Pf3D7_07_v3-1412434-1414746-for	2312	+	[ID=PF3D7_0732900;feature=gene;description=rifin;]
Pf3D7_09_v3	51080	53390	Pf3D7_09_v3-51080-53390-for__Pf3D7_12_v3-45216-47529-for	2310	+	[ID=PF3D7_0900800;feature=gene;description="erythrocyte membrane protein 1 (PfEMP1), exon 2, pseudogene";]
Pf3D7_03_v3	1063867	1066173	Pf3D7_03_v3-1063867-1066173-for__Pf3D7_13_v3-2922379-2924691-for	2306	+
Pf3D7_03_v3	43893	46199	Pf3D7_03_v3-43893-46199-rev__Pf3D7_06_v3-27938-30203-for	2306	-	[ID=PF3D7_0300100;feature=gene;description=erythrocyte membrane protein 1, PfEMP1;]
Pf3D7_13_v3	2882825	2885131	Pf3D7_06_v3-1351956-1354291-for__Pf3D7_13_v3-2882825-2885131-for	2306	+	[ID=PF3D7_1373500;feature=gene;description=erythrocyte membrane protein 1, PfEMP1;],[ID=PF3D7_1373400;feature=gene;description=rifin;]
Pf3D7_11_v3	64306	66611	Pf3D7_06_v3-27899-30159-rev__Pf3D7_11_v3-64306-66611-for	2305	+	[ID=PF3D7_1101000;feature=gene;description="erythrocyte membrane protein 1 (PfEMP1), pseudogene";]
Pf3D7_03_v3	50153	52457	Pf3D7_01_v3-85070-87383-for__Pf3D7_03_v3-50153-52457-for	2304	+	[ID=PF3D7_0300300;feature=gene;description="erythrocyte membrane protein 1 (PfEMP1), exon 2, pseudogene";],[ID=PF3D7_0300400;feature=gene;description=stevor;]
Pf3D7_02_v3	30824	33128	Pf3D7_02_v3-30824-33128-for__Pf3D7_09_v3-27538-29895-for	2304	+	[ID=PF3D7_0200200;feature=gene;description=rifin;],[ID=PF3D7_0200100;feature=gene;description=erythrocyte membrane protein 1, PfEMP1;]
Pf3D7_04_v3	39835	42139	Pf3D7_02_v3-30852-33137-for__Pf3D7_04_v3-39835-42139-for	2304	+	[ID=PF3D7_0400200;feature=gene;description="erythrocyte membrane protein 1 (PfEMP1), exon 2, pseudogene";],[ID=PF3D7_0400300;feature=gene;description=rifin;]
Pf3D7_12_v3	24142	26446	Pf3D7_08_v3-50590-52885-for__Pf3D7_12_v3-24142-26446-for	2304	+	[ID=PF3D7_1200100;feature=gene;description=erythrocyte membrane protein 1, PfEMP1;],[ID=PF3D7_1200200;feature=gene;description=rifin;]
Pf3D7_02_v3	914344	916646	Pf3D7_02_v3-30882-33142-for__Pf3D7_02_v3-914344-916646-rev	2302	-	[ID=PF3D7_0223400;feature=gene;description=rifin;],[ID=PF3D7_0223500;feature=gene;description=erythrocyte membrane protein 1, PfEMP1;]
Pf3D7_02_v3	914344	916646	Pf3D7_02_v3-30882-33142-rev__Pf3D7_02_v3-914344-916646-for	2302	+	[ID=PF3D7_0223400;feature=gene;description=rifin;],[ID=PF3D7_0223500;feature=gene;description=erythrocyte membrane protein 1, PfEMP1;]
Pf3D7_07_v3	53094	55396	Pf3D7_07_v3-53094-55396-for__Pf3D7_10_v3-35601-37915-for	2302	+	[ID=PF3D7_0701000;feature=gene;description="erythrocyte membrane protein 1 (PfEMP1), pseudogene";]
Pf3D7_04_v3	1193055	1195356	Pf3D7_04_v3-1193055-1195356-rev__Pf3D7_09_v3-4769-7058-for	2301	-
Pf3D7_13_v3	28438	30739	Pf3D7_07_v3-1415548-1417924-rev__Pf3D7_13_v3-28438-30739-for	2301	+	[ID=PF3D7_1300100;feature=gene;description=erythrocyte membrane protein 1, PfEMP1;],[ID=PF3D7_1300200;feature=gene;description=rifin;]
Pf3D7_10_v3	1637176	1639477	Pf3D7_07_v3-56476-58775-rev__Pf3D7_10_v3-1637176-1639477-for	2301	+	[ID=PF3D7_1041200;feature=gene;description=rifin;]
Pf3D7_13_v3	2922667	2924967	Pf3D7_03_v3-1063231-1065570-for__Pf3D7_13_v3-2922667-2924967-for	2300	+
Pf3D7_09_v3	27611	29910	Pf3D7_01_v3-36852-39095-for__Pf3D7_09_v3-27611-29910-for	2299	+	[ID=PF3D7_0900100;feature=gene;description=erythrocyte membrane protein 1, PfEMP1;],[ID=PF3D7_0900200;feature=gene;description=rifin;]
Pf3D7_09_v3	27611	29910	Pf3D7_01_v3-605417-607663-rev__Pf3D7_09_v3-27611-29910-for	2299	+	[ID=PF3D7_0900100;feature=gene;description=erythrocyte membrane protein 1, PfEMP1;],[ID=PF3D7_0900200;feature=gene;description=rifin;]
Pf3D7_10_v3	1640387	1642686	Pf3D7_02_v3-30882-33160-rev__Pf3D7_10_v3-1640387-1642686-for	2299	+	[ID=PF3D7_1041300;feature=gene;description=erythrocyte membrane protein 1, PfEMP1;],[ID=PF3D7_1041200;feature=gene;description=rifin;]
Pf3D7_09_v3	27611	29910	Pf3D7_03_v3-44208-46482-for__Pf3D7_09_v3-27611-29910-for	2299	+	[ID=PF3D7_0900100;feature=gene;description=erythrocyte membrane protein 1, PfEMP1;],[ID=PF3D7_0900200;feature=gene;description=rifin;]
Pf3D7_09_v3	27611	29910	Pf3D7_07_v3-53362-55675-for__Pf3D7_09_v3-27611-29910-for	2299	+	[ID=PF3D7_0900100;feature=gene;description=erythrocyte membrane protein 1, PfEMP1;],[ID=PF3D7_0900200;feature=gene;description=rifin;]
Pf3D7_07_v3	56476	58775	Pf3D7_07_v3-56476-58775-rev__Pf3D7_10_v3-1637176-1639477-for	2299	-	[ID=PF3D7_0701100;feature=gene;description=rifin;]
Pf3D7_09_v3	27611	29910	Pf3D7_09_v3-1493594-1495852-for__Pf3D7_09_v3-27611-29910-rev	2299	-	[ID=PF3D7_0900100;feature=gene;description=erythrocyte membrane protein 1, PfEMP1;],[ID=PF3D7_0900200;feature=gene;description=rifin;]
Pf3D7_09_v3	27611	29910	Pf3D7_09_v3-1493594-1495852-rev__Pf3D7_09_v3-27611-29910-for	2299	+	[ID=PF3D7_0900100;feature=gene;description=erythrocyte membrane protein 1, PfEMP1;],[ID=PF3D7_0900200;feature=gene;description=rifin;]
Pf3D7_09_v3	27611	29910	Pf3D7_09_v3-27611-29910-for__Pf3D7_11_v3-64568-66799-for	2299	+	[ID=PF3D7_0900100;feature=gene;description=erythrocyte membrane protein 1, PfEMP1;],[ID=PF3D7_0900200;feature=gene;description=rifin;]
Pf3D7_01_v3	599324	601622	Pf3D7_01_v3-599324-601622-for__Pf3D7_02_v3-900297-902573-for	2298	+	[ID=PF3D7_0115500;feature=gene;description="erythrocyte membrane protein 1 (PfEMP1), pseudogene";],[ID=PF3D7_0115400;feature=gene;description=stevor;]
Pf3D7_03_v3	1028809	1031107	Pf3D7_02_v3-30882-33149-rev__Pf3D7_03_v3-1028809-1031107-for	2298	+	[ID=PF3D7_0324800;feature=gene;description=rifin;],[ID=PF3D7_0324900;feature=gene;description=erythrocyte membrane protein 1, PfEMP1;]
Pf3D7_03_v3	57	2355	Pf3D7_03_v3-1063231-1065484-for__Pf3D7_03_v3-57-2355-rev	2298	-
Pf3D7_14_v3	3277576	3279874	Pf3D7_14_v3-11755-14047-for__Pf3D7_14_v3-3277576-3279874-rev	2298	-	[ID=PF3D7_1479800;feature=gene;description=rifin;]
Pf3D7_14_v3	3277576	3279874	Pf3D7_14_v3-11755-14047-rev__Pf3D7_14_v3-3277576-3279874-for	2298	+	[ID=PF3D7_1479800;feature=gene;description=rifin;]
Pf3D7_01_v3	599325	601622	Pf3D7_01_v3-599325-601622-rev__Pf3D7_02_v3-52121-54400-for	2297	-	[ID=PF3D7_0115500;feature=gene;description="erythrocyte membrane protein 1 (PfEMP1), pseudogene";],[ID=PF3D7_0115400;feature=gene;description=stevor;]
Pf3D7_02_v3	894105	896402	Pf3D7_02_v3-894105-896402-for__Pf3D7_14_v3-3277400-3279677-for	2297	+	[ID=PF3D7_0222600;feature=gene;description=rifin;],[ID=PF3D7_0222700;feature=gene;description=rifin;]
Pf3D7_02_v3	914272	916568	Pf3D7_02_v3-914272-916568-for__Pf3D7_04_v3-1170999-1173269-for	2296	+	[ID=PF3D7_0223400;feature=gene;description=rifin;],[ID=PF3D7_0223500;feature=gene;description=erythrocyte membrane protein 1, PfEMP1;]
Pf3D7_08_v3	50590	52885	Pf3D7_08_v3-50590-52885-for__Pf3D7_12_v3-24142-26446-for	2295	+	[ID=PF3D7_0800300;feature=gene;description=erythrocyte membrane protein 1, PfEMP1;],[ID=PF3D7_0800400;feature=gene;description=rifin;]
Pf3D7_14_v3	3288331	3290625	Pf3D7_06_v3-731936-734177-rev__Pf3D7_14_v3-3288331-3290625-for	2294	+
Pf3D7_10_v3	1640652	1642946	Pf3D7_07_v3-53096-55384-rev__Pf3D7_10_v3-1640652-1642946-for	2294	+	[ID=PF3D7_1041300;feature=gene;description=erythrocyte membrane protein 1, PfEMP1;]
Pf3D7_14_v3	11755	14047	Pf3D7_14_v3-11755-14047-for__Pf3D7_14_v3-3277576-3279874-rev	2292	+	[ID=PF3D7_1400300;feature=gene;description=rifin;]
Pf3D7_14_v3	11755	14047	Pf3D7_14_v3-11755-14047-rev__Pf3D7_14_v3-3277576-3279874-for	2292	-	[ID=PF3D7_1400300;feature=gene;description=rifin;]
Pf3D7_08_v3	1433985	1436276	Pf3D7_08_v3-1433985-1436276-for__Pf3D7_13_v3-2883003-2885265-for	2291	+	[ID=PF3D7_0833500;feature=gene;description=erythrocyte membrane protein 1, PfEMP1;]
Pf3D7_10_v3	39692	41983	Pf3D7_10_v3-39692-41983-for__Pf3D7_14_v3-8835-11184-for	2291	+	[ID=PF3D7_1000300;feature=gene;description=rifin;]
Pf3D7_07_v3	53429	55719	Pf3D7_07_v3-1415525-1417794-rev__Pf3D7_07_v3-53429-55719-for	2290	+	[ID=PF3D7_0701000;feature=gene;description="erythrocyte membrane protein 1 (PfEMP1), pseudogene";],[ID=PF3D7_0701100;feature=gene;description=rifin;]
Pf3D7_11_v3	64329	66618	Pf3D7_03_v3-43968-46286-for__Pf3D7_11_v3-64329-66618-for	2289	+	[ID=PF3D7_1101000;feature=gene;description="erythrocyte membrane protein 1 (PfEMP1), pseudogene";]
Pf3D7_09_v3	4769	7058	Pf3D7_04_v3-1193055-1195356-rev__Pf3D7_09_v3-4769-7058-for	2289	+
Pf3D7_04_v3	1168004	1170292	Pf3D7_04_v3-1168004-1170292-for__Pf3D7_07_v3-1412434-1414746-for	2288	+	[ID=PF3D7_0425900;feature=gene;description=rifin;]
Pf3D7_07_v3	53096	55384	Pf3D7_07_v3-53096-55384-rev__Pf3D7_10_v3-1640652-1642946-for	2288	-	[ID=PF3D7_0701000;feature=gene;description="erythrocyte membrane protein 1 (PfEMP1), pseudogene";]
Pf3D7_02_v3	30852	33137	Pf3D7_02_v3-30852-33137-for__Pf3D7_04_v3-39835-42139-for	2285	+	[ID=PF3D7_0200200;feature=gene;description=rifin;],[ID=PF3D7_0200100;feature=gene;description=erythrocyte membrane protein 1, PfEMP1;]
Pf3D7_03_v3	44196	46481	Pf3D7_02_v3-30882-33142-for__Pf3D7_03_v3-44196-46481-for	2285	+	[ID=PF3D7_0300100;feature=gene;description=erythrocyte membrane protein 1, PfEMP1;],[ID=PF3D7_0300200;feature=gene;description=rifin;]
Pf3D7_10_v3	35866	38150	Pf3D7_02_v3-30882-33130-for__Pf3D7_10_v3-35866-38150-for	2284	+	[ID=PF3D7_1000100;feature=gene;description=erythrocyte membrane protein 1, PfEMP1;],[ID=PF3D7_1000200;feature=gene;description=rifin;]
Pf3D7_09_v3	27611	29895	Pf3D7_04_v3-39880-42130-for__Pf3D7_09_v3-27611-29895-for	2284	+	[ID=PF3D7_0900100;feature=gene;description=erythrocyte membrane protein 1, PfEMP1;],[ID=PF3D7_0900200;feature=gene;description=rifin;]
Pf3D7_09_v3	1533154	1535437	Pf3D7_09_v3-1533154-1535437-rev__Pf3D7_10_v3-6411-8693-for	2283	-
Pf3D7_10_v3	6411	8693	Pf3D7_09_v3-1533154-1535437-rev__Pf3D7_10_v3-6411-8693-for	2282	+
Pf3D7_06_v3	1369524	1371805	Pf3D7_06_v3-1369524-1371805-rev__Pf3D7_13_v3-31576-33855-for	2281	-	[ID=PF3D7_0632700;feature=gene;description=rifin;]
Pf3D7_02_v3	52121	54400	Pf3D7_01_v3-599325-601622-rev__Pf3D7_02_v3-52121-54400-for	2279	+	[ID=PF3D7_0200900;feature=gene;description=stevor, pseudogene;],[ID=PF3D7_0200800;feature=gene;description="erythrocyte membrane protein 1 (PfEMP1), exon 2, pseudogene";]
Pf3D7_13_v3	31576	33855	Pf3D7_06_v3-1369524-1371805-rev__Pf3D7_13_v3-31576-33855-for	2279	+	[ID=PF3D7_1300200;feature=gene;description=rifin;]
Pf3D7_13_v3	31576	33855	Pf3D7_07_v3-56476-58739-for__Pf3D7_13_v3-31576-33855-for	2279	+	[ID=PF3D7_1300200;feature=gene;description=rifin;]
Pf3D7_14_v3	3283572	3285851	Pf3D7_12_v3-2212374-2214615-for__Pf3D7_14_v3-3283572-3285851-for	2279	+	[ID=PF3D7_1479900;feature=gene;description=stevor;]
Pf3D7_02_v3	30882	33160	Pf3D7_02_v3-30882-33160-rev__Pf3D7_10_v3-1640387-1642686-for	2278	-	[ID=PF3D7_0200200;feature=gene;description=rifin;],[ID=PF3D7_0200100;feature=gene;description=erythrocyte membrane protein 1, PfEMP1;]
Pf3D7_01_v3	39902	42179	Pf3D7_01_v3-39902-42179-for__Pf3D7_07_v3-56476-58723-for	2277	+	[ID=PF3D7_0100200;feature=gene;description=rifin;]
Pf3D7_01_v3	39902	42179	Pf3D7_01_v3-39902-42179-rev__Pf3D7_06_v3-1369540-1371805-for	2277	-	[ID=PF3D7_0100200;feature=gene;description=rifin;]
Pf3D7_01_v3	39902	42179	Pf3D7_01_v3-39902-42179-rev__Pf3D7_13_v3-2879584-2881897-for	2277	-	[ID=PF3D7_0100200;feature=gene;description=rifin;]
Pf3D7_01_v3	599345	601622	Pf3D7_01_v3-599345-601622-for__Pf3D7_01_v3-85070-87329-rev	2277	+	[ID=PF3D7_0115500;feature=gene;description="erythrocyte membrane protein 1 (PfEMP1), pseudogene";],[ID=PF3D7_0115400;feature=gene;description=stevor;]
Pf3D7_01_v3	599345	601622	Pf3D7_01_v3-599345-601622-for__Pf3D7_07_v3-1386499-1388757-for	2277	+	[ID=PF3D7_0115500;feature=gene;description="erythrocyte membrane protein 1 (PfEMP1), pseudogene";],[ID=PF3D7_0115400;feature=gene;description=stevor;]
Pf3D7_01_v3	599345	601622	Pf3D7_01_v3-599345-601622-rev__Pf3D7_01_v3-85070-87329-for	2277	-	[ID=PF3D7_0115500;feature=gene;description="erythrocyte membrane protein 1 (PfEMP1), pseudogene";],[ID=PF3D7_0115400;feature=gene;description=stevor;]
Pf3D7_14_v3	3277400	3279677	Pf3D7_02_v3-894105-896402-for__Pf3D7_14_v3-3277400-3279677-for	2277	+	[ID=PF3D7_1479700;feature=gene;description=rifin;],[ID=PF3D7_1479800;feature=gene;description=rifin;]
Pf3D7_09_v3	55548	57825	Pf3D7_06_v3-1331302-1333551-rev__Pf3D7_09_v3-55548-57825-for	2277	+	[ID=PF3D7_0900900;feature=gene;description=stevor;]
Pf3D7_02_v3	900297	902573	Pf3D7_01_v3-599324-601622-for__Pf3D7_02_v3-900297-902573-for	2276	+	[ID=PF3D7_0222900;feature=gene;description="erythrocyte membrane protein 1 (PfEMP1), exon 2, pseudogene";],[ID=PF3D7_0222800;feature=gene;description=stevor;]
Pf3D7_13_v3	31579	33855	Pf3D7_10_v3-39093-41358-for__Pf3D7_13_v3-31579-33855-for	2276	+	[ID=PF3D7_1300200;feature=gene;description=rifin;]
Pf3D7_01_v3	87460	89735	Pf3D7_01_v3-87460-89735-rev__Pf3D7_06_v3-1331477-1333735-for	2275	-	[ID=PF3D7_0101800;feature=gene;description=stevor;]
Pf3D7_03_v3	47040	49315	Pf3D7_03_v3-47040-49315-for__Pf3D7_10_v3-38856-41129-for	2275	+	[ID=PF3D7_0300200;feature=gene;description=rifin;]
Pf3D7_01_v3	39905	42179	Pf3D7_01_v3-39905-42179-for__Pf3D7_10_v3-39093-41342-for	2274	+	[ID=PF3D7_0100200;feature=gene;description=rifin;]
Pf3D7_03_v3	44208	46482	Pf3D7_03_v3-44208-46482-for__Pf3D7_09_v3-27611-29910-for	2274	+	[ID=PF3D7_0300100;feature=gene;description=erythrocyte membrane protein 1, PfEMP1;],[ID=PF3D7_0300200;feature=gene;description=rifin;]
Pf3D7_10_v3	38856	41129	Pf3D7_03_v3-47040-49315-for__Pf3D7_10_v3-38856-41129-for	2273	+	[ID=PF3D7_1000200;feature=gene;description=rifin;]
Pf3D7_01_v3	79606	81877	Pf3D7_01_v3-79606-81877-for__Pf3D7_02_v3-30883-33142-for	2271	+	[ID=PF3D7_0101500;feature=gene;description="erythrocyte membrane protein 1 (PfEMP1), exon 2, pseudogene";],[ID=PF3D7_0101600;feature=gene;description=rifin;]
Pf3D7_04_v3	1170999	1173269	Pf3D7_02_v3-914272-916568-for__Pf3D7_04_v3-1170999-1173269-for	2270	+	[ID=PF3D7_0426000;feature=gene;description=erythrocyte membrane protein 1, PfEMP1;],[ID=PF3D7_0425900;feature=gene;description=rifin;]
Pf3D7_07_v3	53123	55393	Pf3D7_03_v3-43968-46224-for__Pf3D7_07_v3-53123-55393-for	2270	+	[ID=PF3D7_0701000;feature=gene;description="erythrocyte membrane protein 1 (PfEMP1), pseudogene";]
Pf3D7_09_v3	1493595	1495864	Pf3D7_02_v3-30882-33142-rev__Pf3D7_09_v3-1493595-1495864-for	2269	+	[ID=PF3D7_0937800;feature=gene;description=erythrocyte membrane protein 1, PfEMP1;],[ID=PF3D7_0937700;feature=gene;description=rifin;]
Pf3D7_07_v3	1415525	1417794	Pf3D7_03_v3-44275-46526-rev__Pf3D7_07_v3-1415525-1417794-for	2269	+	[ID=PF3D7_0733000;feature=gene;description=erythrocyte membrane protein 1, PfEMP1;],[ID=PF3D7_0732900;feature=gene;description=rifin;]
Pf3D7_13_v3	2854885	2857154	Pf3D7_04_v3-1147019-1149272-for__Pf3D7_13_v3-2854885-2857154-for	2269	+	[ID=PF3D7_1372500;feature=gene;description=stevor, pseudogene;],[ID=PF3D7_1372600;feature=gene;description=rifin;]
Pf3D7_07_v3	1415525	1417794	Pf3D7_07_v3-1415525-1417794-rev__Pf3D7_07_v3-53429-55719-for	2269	-	[ID=PF3D7_0733000;feature=gene;description=erythrocyte membrane protein 1, PfEMP1;],[ID=PF3D7_0732900;feature=gene;description=rifin;]
Pf3D7_03_v3	1028761	1031029	Pf3D7_03_v3-1028761-1031029-for__Pf3D7_06_v3-1351919-1354162-for	2268	+	[ID=PF3D7_0324800;feature=gene;description=rifin;],[ID=PF3D7_0324900;feature=gene;description=erythrocyte membrane protein 1, PfEMP1;]
Pf3D7_02_v3	30882	33149	Pf3D7_02_v3-30882-33149-rev__Pf3D7_03_v3-1028809-1031107-for	2267	-	[ID=PF3D7_0200200;feature=gene;description=rifin;],[ID=PF3D7_0200100;feature=gene;description=erythrocyte membrane protein 1, PfEMP1;]
Pf3D7_06_v3	1369540	1371805	Pf3D7_01_v3-39902-42179-rev__Pf3D7_06_v3-1369540-1371805-for	2265	+	[ID=PF3D7_0632700;feature=gene;description=rifin;]
Pf3D7_06_v3	27938	30203	Pf3D7_03_v3-43893-46199-rev__Pf3D7_06_v3-27938-30203-for	2265	+	[ID=PF3D7_0600600;feature=gene;description="erythrocyte membrane protein 1 (PfEMP1), exon 2";]
Pf3D7_10_v3	35951	38216	Pf3D7_10_v3-35951-38216-rev__Pf3D7_12_v3-2239250-2241477-for	2265	-	[ID=PF3D7_1000100;feature=gene;description=erythrocyte membrane protein 1, PfEMP1;],[ID=PF3D7_1000200;feature=gene;description=rifin;]
Pf3D7_10_v3	39093	41358	Pf3D7_10_v3-39093-41358-for__Pf3D7_13_v3-31579-33855-for	2265	+	[ID=PF3D7_1000200;feature=gene;description=rifin;]
Pf3D7_01_v3	36348	38611	Pf3D7_01_v3-36348-38611-rev__Pf3D7_06_v3-28139-30401-for	2263	-	[ID=PF3D7_0100100;feature=gene;description=erythrocyte membrane protein 1, PfEMP1;]
Pf3D7_07_v3	56476	58739	Pf3D7_07_v3-56476-58739-for__Pf3D7_13_v3-31576-33855-for	2263	+	[ID=PF3D7_0701100;feature=gene;description=rifin;]
Pf3D7_06_v3	28139	30401	Pf3D7_01_v3-36348-38611-rev__Pf3D7_06_v3-28139-30401-for	2262	+	[ID=PF3D7_0600600;feature=gene;description="erythrocyte membrane protein 1 (PfEMP1), exon 2";]
Pf3D7_07_v3	53429	55691	Pf3D7_07_v3-53429-55691-rev__Pf3D7_12_v3-2239287-2241483-for	2262	-	[ID=PF3D7_0701000;feature=gene;description="erythrocyte membrane protein 1 (PfEMP1), pseudogene";],[ID=PF3D7_0701100;feature=gene;description=rifin;]
Pf3D7_13_v3	2883003	2885265	Pf3D7_08_v3-1433985-1436276-for__Pf3D7_13_v3-2883003-2885265-for	2262	+	[ID=PF3D7_1373500;feature=gene;description=erythrocyte membrane protein 1, PfEMP1;]
Pf3D7_07_v3	53123	55384	Pf3D7_01_v3-36612-38847-for__Pf3D7_07_v3-53123-55384-for	2261	+	[ID=PF3D7_0701000;feature=gene;description="erythrocyte membrane protein 1 (PfEMP1), pseudogene";]
Pf3D7_02_v3	914540	916801	Pf3D7_02_v3-914540-916801-rev__Pf3D7_11_v3-64402-66618-for	2261	-	[ID=PF3D7_0223500;feature=gene;description=erythrocyte membrane protein 1, PfEMP1;]
Pf3D7_04_v3	26440	28701	Pf3D7_04_v3-26440-28701-rev__Pf3D7_08_v3-1443462-1445687-for	2261	-
Pf3D7_02_v3	30882	33142	Pf3D7_02_v3-30882-33142-for__Pf3D7_02_v3-914344-916646-rev	2260	+	[ID=PF3D7_0200200;feature=gene;description=rifin;],[ID=PF3D7_0200100;feature=gene;description=erythrocyte membrane protein 1, PfEMP1;]
Pf3D7_02_v3	30882	33142	Pf3D7_02_v3-30882-33142-for__Pf3D7_03_v3-44196-46481-for	2260	+	[ID=PF3D7_0200200;feature=gene;description=rifin;],[ID=PF3D7_0200100;feature=gene;description=erythrocyte membrane protein 1, PfEMP1;]
Pf3D7_02_v3	30882	33142	Pf3D7_02_v3-30882-33142-rev__Pf3D7_02_v3-914344-916646-for	2260	-	[ID=PF3D7_0200200;feature=gene;description=rifin;],[ID=PF3D7_0200100;feature=gene;description=erythrocyte membrane protein 1, PfEMP1;]
Pf3D7_02_v3	30882	33142	Pf3D7_02_v3-30882-33142-rev__Pf3D7_09_v3-1493595-1495864-for	2260	-	[ID=PF3D7_0200200;feature=gene;description=rifin;],[ID=PF3D7_0200100;feature=gene;description=erythrocyte membrane protein 1, PfEMP1;]
Pf3D7_06_v3	27899	30159	Pf3D7_06_v3-27899-30159-rev__Pf3D7_11_v3-64306-66611-for	2260	-	[ID=PF3D7_0600600;feature=gene;description="erythrocyte membrane protein 1 (PfEMP1), exon 2";]
Pf3D7_10_v3	35951	38211	Pf3D7_10_v3-35951-38211-for__Pf3D7_13_v3-28574-30766-for	2260	+	[ID=PF3D7_1000100;feature=gene;description=erythrocyte membrane protein 1, PfEMP1;],[ID=PF3D7_1000200;feature=gene;description=rifin;]
Pf3D7_01_v3	85070	87329	Pf3D7_01_v3-599345-601622-for__Pf3D7_01_v3-85070-87329-rev	2259	-	[ID=PF3D7_0101800;feature=gene;description=stevor;],[ID=PF3D7_0101700;feature=gene;description="erythrocyte membrane protein 1 (PfEMP1), exon 2, pseudogene";]
Pf3D7_01_v3	85070	87329	Pf3D7_01_v3-599345-601622-rev__Pf3D7_01_v3-85070-87329-for	2259	+	[ID=PF3D7_0101800;feature=gene;description=stevor;],[ID=PF3D7_0101700;feature=gene;description="erythrocyte membrane protein 1 (PfEMP1), exon 2, pseudogene";]
Pf3D7_02_v3	30883	33142	Pf3D7_01_v3-79606-81877-for__Pf3D7_02_v3-30883-33142-for	2259	+	[ID=PF3D7_0200200;feature=gene;description=rifin;],[ID=PF3D7_0200100;feature=gene;description=erythrocyte membrane protein 1, PfEMP1;]
Pf3D7_02_v3	30883	33142	Pf3D7_02_v3-30883-33142-for__Pf3D7_07_v3-53351-55674-for	2259	+	[ID=PF3D7_0200200;feature=gene;description=rifin;],[ID=PF3D7_0200100;feature=gene;description=erythrocyte membrane protein 1, PfEMP1;]
Pf3D7_07_v3	1386499	1388757	Pf3D7_01_v3-599345-601622-for__Pf3D7_07_v3-1386499-1388757-for	2258	+	[ID=PF3D7_0732000;feature=gene;description=stevor;],[ID=PF3D7_0732100;feature=gene;description="erythrocyte membrane protein 1 (PfEMP1), pseudogene";]
Pf3D7_06_v3	1331477	1333735	Pf3D7_01_v3-87460-89735-rev__Pf3D7_06_v3-1331477-1333735-for	2258	+	[ID=PF3D7_0631900;feature=gene;description=stevor;]
Pf3D7_03_v3	8343	10601	Pf3D7_03_v3-8343-10601-rev__Pf3D7_07_v3-1438861-1441110-for	2258	-
Pf3D7_09_v3	1493594	1495852	Pf3D7_09_v3-1493594-1495852-for__Pf3D7_09_v3-27611-29910-rev	2258	+	[ID=PF3D7_0937800;feature=gene;description=erythrocyte membrane protein 1, PfEMP1;],[ID=PF3D7_0937700;feature=gene;description=rifin;]
Pf3D7_09_v3	1493594	1495852	Pf3D7_09_v3-1493594-1495852-rev__Pf3D7_09_v3-27611-29910-for	2258	-	[ID=PF3D7_0937800;feature=gene;description=erythrocyte membrane protein 1, PfEMP1;],[ID=PF3D7_0937700;feature=gene;description=rifin;]
Pf3D7_01_v3	1032	3289	Pf3D7_01_v3-1032-3289-for__Pf3D7_03_v3-3598-5813-for	2257	+
Pf3D7_07_v3	1415538	1417794	Pf3D7_02_v3-914312-916567-for__Pf3D7_07_v3-1415538-1417794-for	2256	+	[ID=PF3D7_0733000;feature=gene;description=erythrocyte membrane protein 1, PfEMP1;],[ID=PF3D7_0732900;feature=gene;description=rifin;]
Pf3D7_06_v3	43758	46014	Pf3D7_03_v3-1009584-1011829-rev__Pf3D7_06_v3-43758-46014-for	2256	+	[ID=PF3D7_0601100;feature=gene;description=exported+protein+family+3;]
Pf3D7_03_v3	43968	46224	Pf3D7_03_v3-43968-46224-for__Pf3D7_07_v3-53123-55393-for	2256	+	[ID=PF3D7_0300100;feature=gene;description=erythrocyte membrane protein 1, PfEMP1;]
Pf3D7_07_v3	53224	55479	Pf3D7_01_v3-605603-607802-rev__Pf3D7_07_v3-53224-55479-for	2255	+	[ID=PF3D7_0701000;feature=gene;description="erythrocyte membrane protein 1 (PfEMP1), pseudogene";]
Pf3D7_02_v3	30882	33137	Pf3D7_02_v3-30882-33137-for__Pf3D7_12_v3-41654-43907-for	2255	+	[ID=PF3D7_0200200;feature=gene;description=rifin;],[ID=PF3D7_0200100;feature=gene;description=erythrocyte membrane protein 1, PfEMP1;]
Pf3D7_02_v3	52121	54376	Pf3D7_02_v3-52121-54376-for__Pf3D7_03_v3-50153-52402-for	2255	+	[ID=PF3D7_0200900;feature=gene;description=stevor, pseudogene;],[ID=PF3D7_0200800;feature=gene;description="erythrocyte membrane protein 1 (PfEMP1), exon 2, pseudogene";]
Pf3D7_02_v3	914312	916567	Pf3D7_02_v3-914312-916567-for__Pf3D7_07_v3-1415538-1417794-for	2255	+	[ID=PF3D7_0223400;feature=gene;description=rifin;],[ID=PF3D7_0223500;feature=gene;description=erythrocyte membrane protein 1, PfEMP1;]
Pf3D7_08_v3	1469278	1471533	Pf3D7_03_v3-3598-5810-rev__Pf3D7_08_v3-1469278-1471533-for	2255	+
Pf3D7_02_v3	900319	902573	Pf3D7_02_v3-900319-902573-rev__Pf3D7_03_v3-50153-52405-for	2254	-	[ID=PF3D7_0222900;feature=gene;description="erythrocyte membrane protein 1 (PfEMP1), exon 2, pseudogene";],[ID=PF3D7_0222800;feature=gene;description=stevor;]
Pf3D7_12_v3	41654	43907	Pf3D7_02_v3-30882-33137-for__Pf3D7_12_v3-41654-43907-for	2253	+	[ID=PF3D7_1200400;feature=gene;description=erythrocyte membrane protein 1, PfEMP1;],[ID=PF3D7_1200500;feature=gene;description=rifin;]
Pf3D7_03_v3	1063231	1065484	Pf3D7_03_v3-1063231-1065484-for__Pf3D7_03_v3-57-2355-rev	2253	+
Pf3D7_04_v3	1147019	1149272	Pf3D7_04_v3-1147019-1149272-for__Pf3D7_13_v3-2854885-2857154-for	2253	+	[ID=PF3D7_0425500;feature=gene;description=stevor;]
Pf3D7_12_v3	2239500	2241753	Pf3D7_12_v3-2239500-2241753-for__Pf3D7_13_v3-2883025-2885268-for	2253	+	[ID=PF3D7_1255200;feature=gene;description=erythrocyte membrane protein 1, PfEMP1;]
Pf3D7_03_v3	50153	52405	Pf3D7_02_v3-900319-902573-rev__Pf3D7_03_v3-50153-52405-for	2252	+	[ID=PF3D7_0300300;feature=gene;description="erythrocyte membrane protein 1 (PfEMP1), exon 2, pseudogene";],[ID=PF3D7_0300400;feature=gene;description=stevor;]
Pf3D7_13_v3	60385	62637	Pf3D7_03_v3-50153-52402-for__Pf3D7_13_v3-60385-62637-for	2252	+	[ID=PF3D7_1300900;feature=gene;description=stevor;],[ID=PF3D7_1300800;feature=gene;description="erythrocyte membrane protein 1 (PfEMP1), pseudogene";]
Pf3D7_13_v3	2918157	2920408	Pf3D7_03_v3-3598-5835-rev__Pf3D7_13_v3-2918157-2920408-for	2251	+
Pf3D7_03_v3	44275	46526	Pf3D7_03_v3-44275-46526-rev__Pf3D7_07_v3-1415525-1417794-for	2251	-	[ID=PF3D7_0300100;feature=gene;description=erythrocyte membrane protein 1, PfEMP1;],[ID=PF3D7_0300200;feature=gene;description=rifin;]
Pf3D7_04_v3	39880	42130	Pf3D7_04_v3-39880-42130-for__Pf3D7_09_v3-27611-29895-for	2250	+	[ID=PF3D7_0400200;feature=gene;description="erythrocyte membrane protein 1 (PfEMP1), exon 2, pseudogene";],[ID=PF3D7_0400300;feature=gene;description=rifin;]
Pf3D7_10_v3	39093	41342	Pf3D7_01_v3-39905-42179-for__Pf3D7_10_v3-39093-41342-for	2249	+	[ID=PF3D7_1000200;feature=gene;description=rifin;]
Pf3D7_03_v3	50153	52402	Pf3D7_02_v3-52121-54376-for__Pf3D7_03_v3-50153-52402-for	2249	+	[ID=PF3D7_0300300;feature=gene;description="erythrocyte membrane protein 1 (PfEMP1), exon 2, pseudogene";],[ID=PF3D7_0300400;feature=gene;description=stevor;]
Pf3D7_03_v3	50153	52402	Pf3D7_03_v3-50153-52402-for__Pf3D7_13_v3-60385-62637-for	2249	+	[ID=PF3D7_0300300;feature=gene;description="erythrocyte membrane protein 1 (PfEMP1), exon 2, pseudogene";],[ID=PF3D7_0300400;feature=gene;description=stevor;]
Pf3D7_07_v3	1438861	1441110	Pf3D7_03_v3-8343-10601-rev__Pf3D7_07_v3-1438861-1441110-for	2249	+
Pf3D7_06_v3	1331302	1333551	Pf3D7_06_v3-1331302-1333551-rev__Pf3D7_09_v3-55548-57825-for	2249	-	[ID=PF3D7_0631900;feature=gene;description=stevor;]
Pf3D7_02_v3	30882	33130	Pf3D7_02_v3-30882-33130-for__Pf3D7_10_v3-35866-38150-for	2248	+	[ID=PF3D7_0200200;feature=gene;description=rifin;],[ID=PF3D7_0200100;feature=gene;description=erythrocyte membrane protein 1, PfEMP1;]
Pf3D7_07_v3	56476	58723	Pf3D7_01_v3-39902-42179-for__Pf3D7_07_v3-56476-58723-for	2247	+	[ID=PF3D7_0701100;feature=gene;description=rifin;]
Pf3D7_07_v3	1415547	1417794	Pf3D7_04_v3-39947-42167-rev__Pf3D7_07_v3-1415547-1417794-for	2247	+	[ID=PF3D7_0733000;feature=gene;description=erythrocyte membrane protein 1, PfEMP1;],[ID=PF3D7_0732900;feature=gene;description=rifin;]
Pf3D7_07_v3	1415547	1417794	Pf3D7_07_v3-1415547-1417794-rev__Pf3D7_12_v3-41733-43935-for	2247	-	[ID=PF3D7_0733000;feature=gene;description=erythrocyte membrane protein 1, PfEMP1;],[ID=PF3D7_0732900;feature=gene;description=rifin;]
Pf3D7_07_v3	1415548	1417794	Pf3D7_01_v3-605396-607596-for__Pf3D7_07_v3-1415548-1417794-for	2246	+	[ID=PF3D7_0733000;feature=gene;description=erythrocyte membrane protein 1, PfEMP1;],[ID=PF3D7_0732900;feature=gene;description=rifin;]
Pf3D7_01_v3	605417	607663	Pf3D7_01_v3-605417-607663-rev__Pf3D7_09_v3-27611-29910-for	2246	-	[ID=PF3D7_0115700;feature=gene;description=erythrocyte membrane protein 1, PfEMP1;],[ID=PF3D7_0115600;feature=gene;description=rifin;]
Pf3D7_07_v3	1415548	1417794	Pf3D7_03_v3-1028794-1031028-for__Pf3D7_07_v3-1415548-1417794-for	2246	+	[ID=PF3D7_0733000;feature=gene;description=erythrocyte membrane protein 1, PfEMP1;],[ID=PF3D7_0732900;feature=gene;description=rifin;]
Pf3D7_09_v3	1493540	1495786	Pf3D7_06_v3-1351919-1354162-for__Pf3D7_09_v3-1493540-1495786-for	2246	+	[ID=PF3D7_0937800;feature=gene;description=erythrocyte membrane protein 1, PfEMP1;],[ID=PF3D7_0937700;feature=gene;description=rifin;]
Pf3D7_07_v3	1415548	1417794	Pf3D7_07_v3-1415548-1417794-for__Pf3D7_09_v3-1493573-1495785-for	2246	+	[ID=PF3D7_0733000;feature=gene;description=erythrocyte membrane protein 1, PfEMP1;],[ID=PF3D7_0732900;feature=gene;description=rifin;]
Pf3D7_07_v3	1415548	1417794	Pf3D7_07_v3-1415548-1417794-rev__Pf3D7_10_v3-35945-38184-for	2246	-	[ID=PF3D7_0733000;feature=gene;description=erythrocyte membrane protein 1, PfEMP1;],[ID=PF3D7_0732900;feature=gene;description=rifin;]
Pf3D7_07_v3	1415548	1417794	Pf3D7_07_v3-1415548-1417794-rev__Pf3D7_11_v3-64635-66820-for	2246	-	[ID=PF3D7_0733000;feature=gene;description=erythrocyte membrane protein 1, PfEMP1;],[ID=PF3D7_0732900;feature=gene;description=rifin;]
Pf3D7_03_v3	1009584	1011829	Pf3D7_03_v3-1009584-1011829-rev__Pf3D7_06_v3-43758-46014-for	2245	-	[ID=PF3D7_0324200;feature=gene;description=exported+protein+family+3;]
Pf3D7_02_v3	914324	916568	Pf3D7_02_v3-914324-916568-for__Pf3D7_06_v3-1351954-1354162-for	2244	+	[ID=PF3D7_0223400;feature=gene;description=rifin;],[ID=PF3D7_0223500;feature=gene;description=erythrocyte membrane protein 1, PfEMP1;]
Pf3D7_01_v3	36852	39095	Pf3D7_01_v3-36852-39095-for__Pf3D7_09_v3-27611-29910-for	2243	+	[ID=PF3D7_0100200;feature=gene;description=rifin;],[ID=PF3D7_0100100;feature=gene;description=erythrocyte membrane protein 1, PfEMP1;]
Pf3D7_06_v3	1351919	1354162	Pf3D7_03_v3-1028761-1031029-for__Pf3D7_06_v3-1351919-1354162-for	2243	+	[ID=PF3D7_0632500;feature=gene;description=erythrocyte membrane protein 1, PfEMP1;],[ID=PF3D7_0632400;feature=gene;description=rifin;]
Pf3D7_06_v3	1351919	1354162	Pf3D7_06_v3-1351919-1354162-for__Pf3D7_09_v3-1493540-1495786-for	2243	+	[ID=PF3D7_0632500;feature=gene;description=erythrocyte membrane protein 1, PfEMP1;],[ID=PF3D7_0632400;feature=gene;description=rifin;]
Pf3D7_13_v3	2883025	2885268	Pf3D7_12_v3-2239500-2241753-for__Pf3D7_13_v3-2883025-2885268-for	2243	+	[ID=PF3D7_1373500;feature=gene;description=erythrocyte membrane protein 1, PfEMP1;]
Pf3D7_02_v3	914326	916567	Pf3D7_02_v3-914326-916567-rev__Pf3D7_13_v3-28568-30735-for	2241	-	[ID=PF3D7_0223400;feature=gene;description=rifin;],[ID=PF3D7_0223500;feature=gene;description=erythrocyte membrane protein 1, PfEMP1;]
Pf3D7_03_v3	1028787	1031028	Pf3D7_03_v3-1028787-1031028-for__Pf3D7_12_v3-2239275-2241483-for	2241	+	[ID=PF3D7_0324800;feature=gene;description=rifin;],[ID=PF3D7_0324900;feature=gene;description=erythrocyte membrane protein 1, PfEMP1;]
Pf3D7_06_v3	1303168	1305409	Pf3D7_06_v3-1303168-1305409-rev__Pf3D7_06_v3-59903-62144-for	2241	-
Pf3D7_06_v3	59903	62144	Pf3D7_06_v3-1303168-1305409-rev__Pf3D7_06_v3-59903-62144-for	2241	+
Pf3D7_06_v3	1351921	1354162	Pf3D7_06_v3-1351921-1354162-rev__Pf3D7_11_v3-64634-66851-for	2241	-	[ID=PF3D7_0632500;feature=gene;description=erythrocyte membrane protein 1, PfEMP1;],[ID=PF3D7_0632400;feature=gene;description=rifin;]
Pf3D7_06_v3	731936	734177	Pf3D7_06_v3-731936-734177-rev__Pf3D7_14_v3-3288331-3290625-for	2241	-
Pf3D7_12_v3	2212374	2214615	Pf3D7_12_v3-2212374-2214615-for__Pf3D7_14_v3-3283572-3285851-for	2241	+	[ID=PF3D7_1254300;feature=gene;description=stevor;]
Pf3D7_13_v3	31614	33855	Pf3D7_13_v3-31614-33855-rev__Pf3D7_14_v3-3274275-3276492-for	2241	-	[ID=PF3D7_1300200;feature=gene;description=rifin;]
Pf3D7_10_v3	35945	38184	Pf3D7_07_v3-1415548-1417794-rev__Pf3D7_10_v3-35945-38184-for	2239	+	[ID=PF3D7_1000100;feature=gene;description=erythrocyte membrane protein 1, PfEMP1;],[ID=PF3D7_1000200;feature=gene;description=rifin;]
Pf3D7_03_v3	3598	5835	Pf3D7_03_v3-3598-5835-rev__Pf3D7_13_v3-2918157-2920408-for	2237	-
Pf3D7_09_v3	55277	57514	Pf3D7_07_v3-37134-39335-for__Pf3D7_09_v3-55277-57514-for	2237	+	[ID=PF3D7_0900900;feature=gene;description=stevor;]
Pf3D7_10_v3	35428	37664	Pf3D7_06_v3-28139-30341-rev__Pf3D7_10_v3-35428-37664-for	2236	+	[ID=PF3D7_1000100;feature=gene;description=erythrocyte membrane protein 1, PfEMP1;]
Pf3D7_09_v3	1493550	1495786	Pf3D7_09_v3-1493550-1495786-for__Pf3D7_13_v3-2882798-2885002-for	2236	+	[ID=PF3D7_0937800;feature=gene;description=erythrocyte membrane protein 1, PfEMP1;],[ID=PF3D7_0937700;feature=gene;description=rifin;]
Pf3D7_01_v3	36612	38847	Pf3D7_01_v3-36612-38847-for__Pf3D7_07_v3-53123-55384-for	2235	+	[ID=PF3D7_0100100;feature=gene;description=erythrocyte membrane protein 1, PfEMP1;]
Pf3D7_03_v3	1028794	1031028	Pf3D7_03_v3-1028794-1031028-for__Pf3D7_07_v3-1415548-1417794-for	2234	+	[ID=PF3D7_0324800;feature=gene;description=rifin;],[ID=PF3D7_0324900;feature=gene;description=erythrocyte membrane protein 1, PfEMP1;]
Pf3D7_14_v3	8422	10655	Pf3D7_07_v3-56663-58842-for__Pf3D7_14_v3-8422-10655-for	2233	+	[ID=PF3D7_1400200;feature=gene;description=rifin;]
Pf3D7_09_v3	1493552	1495785	Pf3D7_09_v3-1493552-1495785-for__Pf3D7_12_v3-2239261-2241483-for	2233	+	[ID=PF3D7_0937800;feature=gene;description=erythrocyte membrane protein 1, PfEMP1;],[ID=PF3D7_0937700;feature=gene;description=rifin;]
Pf3D7_09_v3	27678	29910	Pf3D7_07_v3-1415569-1417794-rev__Pf3D7_09_v3-27678-29910-for	2232	+	[ID=PF3D7_0900100;feature=gene;description=erythrocyte membrane protein 1, PfEMP1;],[ID=PF3D7_0900200;feature=gene;description=rifin;]
Pf3D7_09_v3	27678	29910	Pf3D7_09_v3-27678-29910-rev__Pf3D7_12_v3-2239303-2241483-for	2232	-	[ID=PF3D7_0900100;feature=gene;description=erythrocyte membrane protein 1, PfEMP1;],[ID=PF3D7_0900200;feature=gene;description=rifin;]
Pf3D7_12_v3	2239251	2241483	Pf3D7_11_v3-64635-66851-rev__Pf3D7_12_v3-2239251-2241483-for	2232	+	[ID=PF3D7_1255100;feature=gene;description=rifin;],[ID=PF3D7_1255200;feature=gene;description=erythrocyte membrane protein 1, PfEMP1;]
Pf3D7_07_v3	1441016	1443247	Pf3D7_01_v3-3640-5830-rev__Pf3D7_07_v3-1441016-1443247-for	2231	+
Pf3D7_10_v3	1683861	1686092	Pf3D7_03_v3-3598-5804-rev__Pf3D7_10_v3-1683861-1686092-for	2231	+
Pf3D7_03_v3	44274	46505	Pf3D7_03_v3-44274-46505-rev__Pf3D7_13_v3-2882819-2885002-for	2231	-	[ID=PF3D7_0300100;feature=gene;description=erythrocyte membrane protein 1, PfEMP1;],[ID=PF3D7_0300200;feature=gene;description=rifin;]
Pf3D7_11_v3	86287	88518	Pf3D7_07_v3-71729-73959-for__Pf3D7_11_v3-86287-88518-for	2231	+	[ID=PF3D7_1101800;feature=gene;description=exported+protein+family+1;],[ID=PF3D7_1101700;feature=gene;description="Pfmc-2TM+Maurer's+cleft+two+transmembrane+protein";]
Pf3D7_11_v3	64568	66799	Pf3D7_09_v3-27611-29910-for__Pf3D7_11_v3-64568-66799-for	2231	+	[ID=PF3D7_1101000;feature=gene;description="erythrocyte membrane protein 1 (PfEMP1), pseudogene";],[ID=PF3D7_1101100;feature=gene;description=rifin;]
Pf3D7_07_v3	71729	73959	Pf3D7_06_v3-1316243-1318457-rev__Pf3D7_07_v3-71729-73959-for	2230	+	[ID=PF3D7_0701600;feature=gene;description="Pfmc-2TM+Maurer's+cleft+two+transmembrane+protein";],[ID=PF3D7_0701700;feature=gene;description=exported+protein+family+1;]
Pf3D7_07_v3	71729	73959	Pf3D7_07_v3-71729-73959-for__Pf3D7_11_v3-86287-88518-for	2230	+	[ID=PF3D7_0701600;feature=gene;description="Pfmc-2TM+Maurer's+cleft+two+transmembrane+protein";],[ID=PF3D7_0701700;feature=gene;description=exported+protein+family+1;]
Pf3D7_03_v3	44274	46503	Pf3D7_03_v3-44274-46503-rev__Pf3D7_06_v3-1351952-1354162-for	2229	-	[ID=PF3D7_0300100;feature=gene;description=erythrocyte membrane protein 1, PfEMP1;],[ID=PF3D7_0300200;feature=gene;description=rifin;]
Pf3D7_06_v3	1413993	1416222	Pf3D7_06_v3-1413993-1416222-rev__Pf3D7_08_v3-972-3200-for	2229	-
Pf3D7_07_v3	69451	71680	Pf3D7_07_v3-69451-71680-for__Pf3D7_11_v3-84036-86235-for	2229	+	[ID=PF3D7_0701600;feature=gene;description="Pfmc-2TM+Maurer's+cleft+two+transmembrane+protein";]
Pf3D7_09_v3	40815	43043	Pf3D7_04_v3-60804-63018-rev__Pf3D7_09_v3-40815-43043-for	2228	+	[ID=PF3D7_0900500;feature=gene;description=rifin;]
Pf3D7_08_v3	972	3200	Pf3D7_06_v3-1413993-1416222-rev__Pf3D7_08_v3-972-3200-for	2228	+
Pf3D7_03_v3	0	2227	Pf3D7_03_v3-0-2227-for__Pf3D7_03_v3-1063231-1065416-rev	2227	+
Pf3D7_09_v3	27677	29904	Pf3D7_04_v3-1171076-1173269-rev__Pf3D7_09_v3-27677-29904-for	2227	+	[ID=PF3D7_0900100;feature=gene;description=erythrocyte membrane protein 1, PfEMP1;],[ID=PF3D7_0900200;feature=gene;description=rifin;]
Pf3D7_12_v3	2239250	2241477	Pf3D7_10_v3-35951-38216-rev__Pf3D7_12_v3-2239250-2241477-for	2227	+	[ID=PF3D7_1255100;feature=gene;description=rifin;],[ID=PF3D7_1255200;feature=gene;description=erythrocyte membrane protein 1, PfEMP1;]
Pf3D7_07_v3	1415569	1417794	Pf3D7_01_v3-36919-39095-rev__Pf3D7_07_v3-1415569-1417794-for	2225	+	[ID=PF3D7_0733000;feature=gene;description=erythrocyte membrane protein 1, PfEMP1;],[ID=PF3D7_0732900;feature=gene;description=rifin;]
Pf3D7_08_v3	1443462	1445687	Pf3D7_04_v3-26440-28701-rev__Pf3D7_08_v3-1443462-1445687-for	2225	+
Pf3D7_07_v3	1415569	1417794	Pf3D7_07_v3-1415569-1417794-rev__Pf3D7_09_v3-27678-29910-for	2225	-	[ID=PF3D7_0733000;feature=gene;description=erythrocyte membrane protein 1, PfEMP1;],[ID=PF3D7_0732900;feature=gene;description=rifin;]
Pf3D7_03_v3	44275	46498	Pf3D7_03_v3-44275-46498-rev__Pf3D7_12_v3-2239287-2241483-for	2223	-	[ID=PF3D7_0300100;feature=gene;description=erythrocyte membrane protein 1, PfEMP1;],[ID=PF3D7_0300200;feature=gene;description=rifin;]
Pf3D7_06_v3	1372726	1374949	Pf3D7_04_v3-40004-42166-rev__Pf3D7_06_v3-1372726-1374949-for	2223	+	[ID=PF3D7_0632700;feature=gene;description=rifin;],[ID=PF3D7_0632800;feature=gene;description=erythrocyte membrane protein 1, PfEMP1;]
Pf3D7_12_v3	2239261	2241483	Pf3D7_01_v3-605375-607596-for__Pf3D7_12_v3-2239261-2241483-for	2222	+	[ID=PF3D7_1255100;feature=gene;description=rifin;],[ID=PF3D7_1255200;feature=gene;description=erythrocyte membrane protein 1, PfEMP1;]
Pf3D7_12_v3	2239261	2241483	Pf3D7_09_v3-1493552-1495785-for__Pf3D7_12_v3-2239261-2241483-for	2222	+	[ID=PF3D7_1255100;feature=gene;description=rifin;],[ID=PF3D7_1255200;feature=gene;description=erythrocyte membrane protein 1, PfEMP1;]
Pf3D7_01_v3	605375	607596	Pf3D7_01_v3-605375-607596-for__Pf3D7_12_v3-2239261-2241483-for	2221	+	[ID=PF3D7_0115700;feature=gene;description=erythrocyte membrane protein 1, PfEMP1;],[ID=PF3D7_0115600;feature=gene;description=rifin;]
Pf3D7_06_v3	1369706	1371927	Pf3D7_06_v3-1369706-1371927-for__Pf3D7_13_v3-2879802-2882019-for	2221	+	[ID=PF3D7_0632700;feature=gene;description=rifin;]
Pf3D7_04_v3	1171049	1173269	Pf3D7_01_v3-36918-39116-rev__Pf3D7_04_v3-1171049-1173269-for	2220	+	[ID=PF3D7_0426000;feature=gene;description=erythrocyte membrane protein 1, PfEMP1;],[ID=PF3D7_0425900;feature=gene;description=rifin;]
Pf3D7_04_v3	39946	42166	Pf3D7_04_v3-39946-42166-rev__Pf3D7_06_v3-1351952-1354162-for	2220	-	[ID=PF3D7_0400200;feature=gene;description="erythrocyte membrane protein 1 (PfEMP1), exon 2, pseudogene";],[ID=PF3D7_0400300;feature=gene;description=rifin;]
Pf3D7_04_v3	39947	42167	Pf3D7_04_v3-39947-42167-rev__Pf3D7_07_v3-1415547-1417794-for	2220	-	[ID=PF3D7_0400200;feature=gene;description="erythrocyte membrane protein 1 (PfEMP1), exon 2, pseudogene";],[ID=PF3D7_0400300;feature=gene;description=rifin;]
Pf3D7_09_v3	1481956	1484175	Pf3D7_06_v3-1342340-1344544-for__Pf3D7_09_v3-1481956-1484175-for	2219	+	[ID=PF3D7_0937500;feature=gene;description=rifin;]
Pf3D7_02_v3	7677	9895	Pf3D7_02_v3-7677-9895-for__Pf3D7_10_v3-7347-9537-for	2218	+
Pf3D7_11_v3	64634	66851	Pf3D7_06_v3-1351921-1354162-rev__Pf3D7_11_v3-64634-66851-for	2217	+	[ID=PF3D7_1101000;feature=gene;description="erythrocyte membrane protein 1 (PfEMP1), pseudogene";],[ID=PF3D7_1101100;feature=gene;description=rifin;]
Pf3D7_13_v3	2879802	2882019	Pf3D7_06_v3-1369706-1371927-for__Pf3D7_13_v3-2879802-2882019-for	2217	+	[ID=PF3D7_1373400;feature=gene;description=rifin;]
Pf3D7_14_v3	3274275	3276492	Pf3D7_13_v3-31614-33855-rev__Pf3D7_14_v3-3274275-3276492-for	2217	+	[ID=PF3D7_1479700;feature=gene;description=rifin;]
Pf3D7_04_v3	1171053	1173269	Pf3D7_01_v3-79683-81895-rev__Pf3D7_04_v3-1171053-1173269-for	2216	+	[ID=PF3D7_0426000;feature=gene;description=erythrocyte membrane protein 1, PfEMP1;],[ID=PF3D7_0425900;feature=gene;description=rifin;]
Pf3D7_11_v3	64402	66618	Pf3D7_02_v3-914540-916801-rev__Pf3D7_11_v3-64402-66618-for	2216	+	[ID=PF3D7_1101000;feature=gene;description="erythrocyte membrane protein 1 (PfEMP1), pseudogene";]
Pf3D7_11_v3	64635	66851	Pf3D7_11_v3-64635-66851-rev__Pf3D7_12_v3-2239251-2241483-for	2216	-	[ID=PF3D7_1101000;feature=gene;description="erythrocyte membrane protein 1 (PfEMP1), pseudogene";],[ID=PF3D7_1101100;feature=gene;description=rifin;]
Pf3D7_03_v3	3598	5813	Pf3D7_01_v3-1032-3289-for__Pf3D7_03_v3-3598-5813-for	2215	+
Pf3D7_02_v3	914352	916567	Pf3D7_02_v3-914352-916567-for__Pf3D7_12_v3-2239312-2241483-for	2215	+	[ID=PF3D7_0223400;feature=gene;description=rifin;],[ID=PF3D7_0223500;feature=gene;description=erythrocyte membrane protein 1, PfEMP1;]
Pf3D7_08_v3	1016	3231	Pf3D7_08_v3-1016-3231-for__Pf3D7_12_v3-846-3028-for	2215	+
Pf3D7_08_v3	1016	3231	Pf3D7_08_v3-1016-3231-for__Pf3D7_13_v3-1436-3651-for	2215	+
Pf3D7_13_v3	1436	3651	Pf3D7_08_v3-1016-3231-for__Pf3D7_13_v3-1436-3651-for	2215	+
Pf3D7_01_v3	79683	81897	Pf3D7_01_v3-79683-81897-rev__Pf3D7_13_v3-2882823-2885002-for	2214	-	[ID=PF3D7_0101500;feature=gene;description="erythrocyte membrane protein 1 (PfEMP1), exon 2, pseudogene";],[ID=PF3D7_0101600;feature=gene;description=rifin;]
Pf3D7_04_v3	60804	63018	Pf3D7_04_v3-60804-63018-rev__Pf3D7_09_v3-40815-43043-for	2214	-	[ID=PF3D7_0400600;feature=gene;description="erythrocyte membrane protein 1 (PfEMP1), exon 1, pseudogene";],[ID=PF3D7_0400500;feature=gene;description=rifin;]
Pf3D7_06_v3	1316243	1318457	Pf3D7_06_v3-1316243-1318457-rev__Pf3D7_07_v3-71729-73959-for	2214	-	[ID=PF3D7_0631300;feature=gene;description=exported+protein+family+1;],[ID=PF3D7_0631400;feature=gene;description="Pfmc-2TM+Maurer's+cleft+two+transmembrane+protein";]
Pf3D7_10_v3	1679148	1681361	Pf3D7_03_v3-8523-10727-rev__Pf3D7_10_v3-1679148-1681361-for	2213	+
Pf3D7_01_v3	79683	81895	Pf3D7_01_v3-79683-81895-rev__Pf3D7_04_v3-1171053-1173269-for	2212	-	[ID=PF3D7_0101500;feature=gene;description="erythrocyte membrane protein 1 (PfEMP1), exon 2, pseudogene";],[ID=PF3D7_0101600;feature=gene;description=rifin;]
Pf3D7_03_v3	3598	5810	Pf3D7_03_v3-3598-5810-rev__Pf3D7_08_v3-1469278-1471533-for	2212	-
Pf3D7_09_v3	1493573	1495785	Pf3D7_07_v3-1415548-1417794-for__Pf3D7_09_v3-1493573-1495785-for	2212	+	[ID=PF3D7_0937800;feature=gene;description=erythrocyte membrane protein 1, PfEMP1;],[ID=PF3D7_0937700;feature=gene;description=rifin;]
Pf3D7_07_v3	1415584	1417794	Pf3D7_02_v3-30961-33128-rev__Pf3D7_07_v3-1415584-1417794-for	2210	+	[ID=PF3D7_0733000;feature=gene;description=erythrocyte membrane protein 1, PfEMP1;],[ID=PF3D7_0732900;feature=gene;description=rifin;]
Pf3D7_06_v3	1351952	1354162	Pf3D7_03_v3-44274-46503-rev__Pf3D7_06_v3-1351952-1354162-for	2210	+	[ID=PF3D7_0632500;feature=gene;description=erythrocyte membrane protein 1, PfEMP1;],[ID=PF3D7_0632400;feature=gene;description=rifin;]
Pf3D7_10_v3	35944	38154	Pf3D7_04_v3-1171079-1173269-rev__Pf3D7_10_v3-35944-38154-for	2210	+	[ID=PF3D7_1000100;feature=gene;description=erythrocyte membrane protein 1, PfEMP1;],[ID=PF3D7_1000200;feature=gene;description=rifin;]
Pf3D7_06_v3	1351952	1354162	Pf3D7_04_v3-39946-42166-rev__Pf3D7_06_v3-1351952-1354162-for	2210	+	[ID=PF3D7_0632500;feature=gene;description=erythrocyte membrane protein 1, PfEMP1;],[ID=PF3D7_0632400;feature=gene;description=rifin;]
Pf3D7_06_v3	1351952	1354162	Pf3D7_06_v3-1351952-1354162-rev__Pf3D7_12_v3-41732-43934-for	2210	-	[ID=PF3D7_0632500;feature=gene;description=erythrocyte membrane protein 1, PfEMP1;],[ID=PF3D7_0632400;feature=gene;description=rifin;]
Pf3D7_08_v3	1469278	1471488	Pf3D7_08_v3-1469278-1471488-for__Pf3D7_08_v3-997-3206-rev	2210	+
Pf3D7_01_v3	605388	607597	Pf3D7_01_v3-605388-607597-for__Pf3D7_13_v3-2882813-2885002-for	2209	+	[ID=PF3D7_0115700;feature=gene;description=erythrocyte membrane protein 1, PfEMP1;],[ID=PF3D7_0115600;feature=gene;description=rifin;]
Pf3D7_02_v3	914592	916801	Pf3D7_02_v3-914592-916801-rev__Pf3D7_07_v3-53196-55388-for	2209	-	[ID=PF3D7_0223500;feature=gene;description=erythrocyte membrane protein 1, PfEMP1;]
Pf3D7_09_v3	64483	66692	Pf3D7_08_v3-1422755-1424935-rev__Pf3D7_09_v3-64483-66692-for	2209	+
Pf3D7_08_v3	997	3206	Pf3D7_08_v3-1469278-1471488-for__Pf3D7_08_v3-997-3206-rev	2209	-
Pf3D7_06_v3	1351954	1354162	Pf3D7_02_v3-914324-916568-for__Pf3D7_06_v3-1351954-1354162-for	2208	+	[ID=PF3D7_0632500;feature=gene;description=erythrocyte membrane protein 1, PfEMP1;],[ID=PF3D7_0632400;feature=gene;description=rifin;]
Pf3D7_12_v3	2239275	2241483	Pf3D7_03_v3-1028787-1031028-for__Pf3D7_12_v3-2239275-2241483-for	2208	+	[ID=PF3D7_1255100;feature=gene;description=rifin;],[ID=PF3D7_1255200;feature=gene;description=erythrocyte membrane protein 1, PfEMP1;]
Pf3D7_01_v3	27289	29496	Pf3D7_01_v3-27289-29496-rev__Pf3D7_08_v3-1443467-1445658-for	2207	-
Pf3D7_07_v3	1415587	1417794	Pf3D7_07_v3-1415587-1417794-for__Pf3D7_10_v3-1640422-1642607-for	2207	+	[ID=PF3D7_0733000;feature=gene;description=erythrocyte membrane protein 1, PfEMP1;],[ID=PF3D7_0732900;feature=gene;description=rifin;]
Pf3D7_08_v3	1433797	1436003	Pf3D7_01_v3-605396-607596-for__Pf3D7_08_v3-1433797-1436003-for	2206	+	[ID=PF3D7_0833400;feature=gene;description=rifin;],[ID=PF3D7_0833500;feature=gene;description=erythrocyte membrane protein 1, PfEMP1;]
Pf3D7_03_v3	3598	5804	Pf3D7_03_v3-3598-5804-rev__Pf3D7_10_v3-1683861-1686092-for	2206	-
Pf3D7_08_v3	1433797	1436003	Pf3D7_08_v3-1433797-1436003-rev__Pf3D7_11_v3-64635-66820-for	2206	-	[ID=PF3D7_0833400;feature=gene;description=rifin;],[ID=PF3D7_0833500;feature=gene;description=erythrocyte membrane protein 1, PfEMP1;]
Pf3D7_10_v3	26312	28517	Pf3D7_01_v3-27346-29537-for__Pf3D7_10_v3-26312-28517-for	2205	+	[ID=PF3D7_1000100;feature=gene;description=erythrocyte membrane protein 1, PfEMP1;]
Pf3D7_01_v3	79683	81887	Pf3D7_01_v3-79683-81887-rev__Pf3D7_06_v3-1351964-1354162-for	2204	-	[ID=PF3D7_0101500;feature=gene;description="erythrocyte membrane protein 1 (PfEMP1), exon 2, pseudogene";],[ID=PF3D7_0101600;feature=gene;description=rifin;]
Pf3D7_03_v3	8523	10727	Pf3D7_03_v3-8523-10727-rev__Pf3D7_10_v3-1679148-1681361-for	2204	-
Pf3D7_06_v3	1342340	1344544	Pf3D7_06_v3-1342340-1344544-for__Pf3D7_09_v3-1481956-1484175-for	2204	+	[ID=PF3D7_0632200;feature=gene;description=rifin;]
Pf3D7_13_v3	2882798	2885002	Pf3D7_09_v3-1493550-1495786-for__Pf3D7_13_v3-2882798-2885002-for	2204	+	[ID=PF3D7_1373500;feature=gene;description=erythrocyte membrane protein 1, PfEMP1;],[ID=PF3D7_1373400;feature=gene;description=rifin;]
Pf3D7_10_v3	1640405	1642608	Pf3D7_06_v3-1351974-1354162-for__Pf3D7_10_v3-1640405-1642608-for	2203	+	[ID=PF3D7_1041300;feature=gene;description=erythrocyte membrane protein 1, PfEMP1;],[ID=PF3D7_1041200;feature=gene;description=rifin;]
Pf3D7_03_v3	1029011	1031213	Pf3D7_03_v3-1029011-1031213-rev__Pf3D7_11_v3-64450-66618-for	2202	-	[ID=PF3D7_0324900;feature=gene;description=erythrocyte membrane protein 1, PfEMP1;]
Pf3D7_03_v3	44274	46476	Pf3D7_03_v3-44274-46476-rev__Pf3D7_04_v3-1171076-1173269-for	2202	-	[ID=PF3D7_0300100;feature=gene;description=erythrocyte membrane protein 1, PfEMP1;],[ID=PF3D7_0300200;feature=gene;description=rifin;]
Pf3D7_12_v3	41732	43934	Pf3D7_06_v3-1351952-1354162-rev__Pf3D7_12_v3-41732-43934-for	2202	+	[ID=PF3D7_1200400;feature=gene;description=erythrocyte membrane protein 1, PfEMP1;],[ID=PF3D7_1200500;feature=gene;description=rifin;]
Pf3D7_06_v3	28139	30341	Pf3D7_06_v3-28139-30341-rev__Pf3D7_10_v3-35428-37664-for	2202	-	[ID=PF3D7_0600600;feature=gene;description="erythrocyte membrane protein 1 (PfEMP1), exon 2";]
Pf3D7_12_v3	41733	43935	Pf3D7_07_v3-1415547-1417794-rev__Pf3D7_12_v3-41733-43935-for	2202	+	[ID=PF3D7_1200400;feature=gene;description=erythrocyte membrane protein 1, PfEMP1;],[ID=PF3D7_1200500;feature=gene;description=rifin;]
Pf3D7_07_v3	37134	39335	Pf3D7_07_v3-37134-39335-for__Pf3D7_09_v3-55277-57514-for	2201	+	[ID=PF3D7_0700400;feature=gene;description=stevor;]
Pf3D7_01_v3	605396	607596	Pf3D7_01_v3-605396-607596-for__Pf3D7_07_v3-1415548-1417794-for	2200	+	[ID=PF3D7_0115700;feature=gene;description=erythrocyte membrane protein 1, PfEMP1;],[ID=PF3D7_0115600;feature=gene;description=rifin;]
Pf3D7_01_v3	605396	607596	Pf3D7_01_v3-605396-607596-for__Pf3D7_08_v3-1433797-1436003-for	2200	+	[ID=PF3D7_0115700;feature=gene;description=erythrocyte membrane protein 1, PfEMP1;],[ID=PF3D7_0115600;feature=gene;description=rifin;]
Pf3D7_14_v3	5127	7327	Pf3D7_01_v3-605411-607596-rev__Pf3D7_14_v3-5127-7327-for	2200	+	[ID=PF3D7_1400100;feature=gene;description="erythrocyte membrane protein 1 (PfEMP1), pseudogene";],[ID=PF3D7_1400200;feature=gene;description=rifin;]
Pf3D7_01_v3	605603	607802	Pf3D7_01_v3-605603-607802-rev__Pf3D7_07_v3-53224-55479-for	2199	-	[ID=PF3D7_0115700;feature=gene;description=erythrocyte membrane protein 1, PfEMP1;]
Pf3D7_11_v3	84036	86235	Pf3D7_07_v3-69451-71680-for__Pf3D7_11_v3-84036-86235-for	2199	+	[ID=PF3D7_1101700;feature=gene;description="Pfmc-2TM+Maurer's+cleft+two+transmembrane+protein";]
Pf3D7_01_v3	36918	39116	Pf3D7_01_v3-36918-39116-rev__Pf3D7_04_v3-1171049-1173269-for	2198	-	[ID=PF3D7_0100200;feature=gene;description=rifin;],[ID=PF3D7_0100100;feature=gene;description=erythrocyte membrane protein 1, PfEMP1;]
Pf3D7_01_v3	605898	608096	Pf3D7_01_v3-605898-608096-for__Pf3D7_06_v3-28139-30327-for	2198	+	[ID=PF3D7_0115700;feature=gene;description=erythrocyte membrane protein 1, PfEMP1;]
Pf3D7_06_v3	1351964	1354162	Pf3D7_01_v3-79683-81887-rev__Pf3D7_06_v3-1351964-1354162-for	2198	+	[ID=PF3D7_0632500;feature=gene;description=erythrocyte membrane protein 1, PfEMP1;],[ID=PF3D7_0632400;feature=gene;description=rifin;]
Pf3D7_13_v3	2864694	2866892	Pf3D7_03_v3-1022833-1025026-for__Pf3D7_13_v3-2864694-2866892-for	2198	+	[ID=PF3D7_1372900;feature=gene;description="erythrocyte membrane protein 1 (PfEMP1), exon 2, pseudogene";],[ID=PF3D7_1372800;feature=gene;description=stevor;]
Pf3D7_10_v3	1640410	1642608	Pf3D7_04_v3-1171076-1173269-for__Pf3D7_10_v3-1640410-1642608-for	2198	+	[ID=PF3D7_1041300;feature=gene;description=erythrocyte membrane protein 1, PfEMP1;],[ID=PF3D7_1041200;feature=gene;description=rifin;]
Pf3D7_04_v3	1171269	1173466	Pf3D7_04_v3-1171269-1173466-for__Pf3D7_08_v3-1434007-1436201-for	2197	+	[ID=PF3D7_0426000;feature=gene;description=erythrocyte membrane protein 1, PfEMP1;]
Pf3D7_13_v3	2916175	2918372	Pf3D7_08_v3-1466060-1468254-for__Pf3D7_13_v3-2916175-2918372-for	2197	+
Pf3D7_03_v3	1028833	1031029	Pf3D7_03_v3-1028833-1031029-for__Pf3D7_04_v3-1171088-1173269-for	2196	+	[ID=PF3D7_0324800;feature=gene;description=rifin;],[ID=PF3D7_0324900;feature=gene;description=erythrocyte membrane protein 1, PfEMP1;]
Pf3D7_12_v3	2239287	2241483	Pf3D7_03_v3-44275-46498-rev__Pf3D7_12_v3-2239287-2241483-for	2196	+	[ID=PF3D7_1255100;feature=gene;description=rifin;],[ID=PF3D7_1255200;feature=gene;description=erythrocyte membrane protein 1, PfEMP1;]
Pf3D7_12_v3	2239287	2241483	Pf3D7_07_v3-53429-55691-rev__Pf3D7_12_v3-2239287-2241483-for	2196	+	[ID=PF3D7_1255100;feature=gene;description=rifin;],[ID=PF3D7_1255200;feature=gene;description=erythrocyte membrane protein 1, PfEMP1;]
Pf3D7_13_v3	31152	33348	Pf3D7_11_v3-67236-69423-for__Pf3D7_13_v3-31152-33348-for	2196	+	[ID=PF3D7_1300200;feature=gene;description=rifin;]
Pf3D7_06_v3	1351967	1354162	Pf3D7_01_v3-36918-39101-rev__Pf3D7_06_v3-1351967-1354162-for	2195	+	[ID=PF3D7_0632500;feature=gene;description=erythrocyte membrane protein 1, PfEMP1;],[ID=PF3D7_0632400;feature=gene;description=rifin;]
Pf3D7_11_v3	64634	66829	Pf3D7_11_v3-64634-66829-rev__Pf3D7_13_v3-2882812-2885002-for	2195	-	[ID=PF3D7_1101000;feature=gene;description="erythrocyte membrane protein 1 (PfEMP1), pseudogene";],[ID=PF3D7_1101100;feature=gene;description=rifin;]
Pf3D7_08_v3	1434007	1436201	Pf3D7_04_v3-1171269-1173466-for__Pf3D7_08_v3-1434007-1436201-for	2194	+	[ID=PF3D7_0833500;feature=gene;description=erythrocyte membrane protein 1, PfEMP1;]
Pf3D7_08_v3	1466060	1468254	Pf3D7_08_v3-1466060-1468254-for__Pf3D7_13_v3-2916175-2918372-for	2194	+
Pf3D7_14_v3	5133	7327	Pf3D7_11_v3-64641-66805-for__Pf3D7_14_v3-5133-7327-for	2194	+	[ID=PF3D7_1400100;feature=gene;description="erythrocyte membrane protein 1 (PfEMP1), pseudogene";],[ID=PF3D7_1400200;feature=gene;description=rifin;]
Pf3D7_01_v3	79684	81877	Pf3D7_01_v3-79684-81877-rev__Pf3D7_12_v3-2239304-2241483-for	2193	-	[ID=PF3D7_0101500;feature=gene;description="erythrocyte membrane protein 1 (PfEMP1), exon 2, pseudogene";],[ID=PF3D7_0101600;feature=gene;description=rifin;]
Pf3D7_04_v3	1171076	1173269	Pf3D7_02_v3-30960-33137-rev__Pf3D7_04_v3-1171076-1173269-for	2193	+	[ID=PF3D7_0426000;feature=gene;description=erythrocyte membrane protein 1, PfEMP1;],[ID=PF3D7_0425900;feature=gene;description=rifin;]
Pf3D7_03_v3	1022833	1025026	Pf3D7_03_v3-1022833-1025026-for__Pf3D7_13_v3-2864694-2866892-for	2193	+	[ID=PF3D7_0324600;feature=gene;description=stevor;],[ID=PF3D7_0324700;feature=gene;description="erythrocyte membrane protein 1 (PfEMP1), exon 2, pseudogene";]
Pf3D7_04_v3	1171076	1173269	Pf3D7_03_v3-44274-46476-rev__Pf3D7_04_v3-1171076-1173269-for	2193	+	[ID=PF3D7_0426000;feature=gene;description=erythrocyte membrane protein 1, PfEMP1;],[ID=PF3D7_0425900;feature=gene;description=rifin;]
Pf3D7_04_v3	39946	42139	Pf3D7_04_v3-1171076-1173269-for__Pf3D7_04_v3-39946-42139-rev	2193	-	[ID=PF3D7_0400200;feature=gene;description="erythrocyte membrane protein 1 (PfEMP1), exon 2, pseudogene";],[ID=PF3D7_0400300;feature=gene;description=rifin;]
Pf3D7_04_v3	1171076	1173269	Pf3D7_04_v3-1171076-1173269-for__Pf3D7_04_v3-39946-42139-rev	2193	+	[ID=PF3D7_0426000;feature=gene;description=erythrocyte membrane protein 1, PfEMP1;],[ID=PF3D7_0425900;feature=gene;description=rifin;]
Pf3D7_04_v3	1171076	1173269	Pf3D7_04_v3-1171076-1173269-for__Pf3D7_10_v3-1640410-1642608-for	2193	+	[ID=PF3D7_0426000;feature=gene;description=erythrocyte membrane protein 1, PfEMP1;],[ID=PF3D7_0425900;feature=gene;description=rifin;]
Pf3D7_04_v3	1171076	1173269	Pf3D7_04_v3-1171076-1173269-rev__Pf3D7_04_v3-39946-42139-for	2193	-	[ID=PF3D7_0426000;feature=gene;description=erythrocyte membrane protein 1, PfEMP1;],[ID=PF3D7_0425900;feature=gene;description=rifin;]
Pf3D7_04_v3	39946	42139	Pf3D7_04_v3-1171076-1173269-rev__Pf3D7_04_v3-39946-42139-for	2193	+	[ID=PF3D7_0400200;feature=gene;description="erythrocyte membrane protein 1 (PfEMP1), exon 2, pseudogene";],[ID=PF3D7_0400300;feature=gene;description=rifin;]
Pf3D7_04_v3	1171076	1173269	Pf3D7_04_v3-1171076-1173269-rev__Pf3D7_09_v3-27677-29904-for	2193	-	[ID=PF3D7_0426000;feature=gene;description=erythrocyte membrane protein 1, PfEMP1;],[ID=PF3D7_0425900;feature=gene;description=rifin;]
Pf3D7_04_v3	1171076	1173269	Pf3D7_04_v3-1171076-1173269-rev__Pf3D7_11_v3-64634-66793-for	2193	-	[ID=PF3D7_0426000;feature=gene;description=erythrocyte membrane protein 1, PfEMP1;],[ID=PF3D7_0425900;feature=gene;description=rifin;]
Pf3D7_04_v3	1171076	1173269	Pf3D7_04_v3-1171076-1173269-rev__Pf3D7_12_v3-41732-43907-for	2193	-	[ID=PF3D7_0426000;feature=gene;description=erythrocyte membrane protein 1, PfEMP1;],[ID=PF3D7_0425900;feature=gene;description=rifin;]
Pf3D7_08_v3	1430703	1432896	Pf3D7_08_v3-1430703-1432896-rev__Pf3D7_14_v3-8346-10535-for	2193	-	[ID=PF3D7_0833400;feature=gene;description=rifin;]
Pf3D7_07_v3	53196	55388	Pf3D7_02_v3-914592-916801-rev__Pf3D7_07_v3-53196-55388-for	2192	+	[ID=PF3D7_0701000;feature=gene;description="erythrocyte membrane protein 1 (PfEMP1), pseudogene";]
Pf3D7_13_v3	28574	30766	Pf3D7_10_v3-35951-38211-for__Pf3D7_13_v3-28574-30766-for	2192	+	[ID=PF3D7_1300100;feature=gene;description=erythrocyte membrane protein 1, PfEMP1;],[ID=PF3D7_1300200;feature=gene;description=rifin;]
Pf3D7_08_v3	1443467	1445658	Pf3D7_01_v3-27289-29496-rev__Pf3D7_08_v3-1443467-1445658-for	2191	+
Pf3D7_01_v3	27346	29537	Pf3D7_01_v3-27346-29537-for__Pf3D7_10_v3-26312-28517-for	2191	+	[ID=PF3D7_0100100;feature=gene;description=erythrocyte membrane protein 1, PfEMP1;]
Pf3D7_01_v3	3640	5830	Pf3D7_01_v3-3640-5830-rev__Pf3D7_07_v3-1441016-1443247-for	2190	-
Pf3D7_10_v3	7347	9537	Pf3D7_02_v3-7677-9895-for__Pf3D7_10_v3-7347-9537-for	2190	+
Pf3D7_04_v3	1171079	1173269	Pf3D7_04_v3-1171079-1173269-rev__Pf3D7_10_v3-35944-38154-for	2190	-	[ID=PF3D7_0426000;feature=gene;description=erythrocyte membrane protein 1, PfEMP1;],[ID=PF3D7_0425900;feature=gene;description=rifin;]
Pf3D7_10_v3	1640417	1642607	Pf3D7_10_v3-1640417-1642607-for__Pf3D7_12_v3-2239316-2241483-for	2190	+	[ID=PF3D7_1041300;feature=gene;description=erythrocyte membrane protein 1, PfEMP1;],[ID=PF3D7_1041200;feature=gene;description=rifin;]
Pf3D7_13_v3	2882812	2885002	Pf3D7_11_v3-64634-66829-rev__Pf3D7_13_v3-2882812-2885002-for	2190	+	[ID=PF3D7_1373500;feature=gene;description=erythrocyte membrane protein 1, PfEMP1;],[ID=PF3D7_1373400;feature=gene;description=rifin;]
Pf3D7_13_v3	2882813	2885002	Pf3D7_01_v3-605388-607597-for__Pf3D7_13_v3-2882813-2885002-for	2189	+	[ID=PF3D7_1373500;feature=gene;description=erythrocyte membrane protein 1, PfEMP1;],[ID=PF3D7_1373400;feature=gene;description=rifin;]
Pf3D7_14_v3	8346	10535	Pf3D7_08_v3-1430703-1432896-rev__Pf3D7_14_v3-8346-10535-for	2189	+	[ID=PF3D7_1400200;feature=gene;description=rifin;]
Pf3D7_06_v3	28139	30327	Pf3D7_01_v3-605898-608096-for__Pf3D7_06_v3-28139-30327-for	2188	+	[ID=PF3D7_0600600;feature=gene;description="erythrocyte membrane protein 1 (PfEMP1), exon 2";]
Pf3D7_06_v3	1351974	1354162	Pf3D7_02_v3-30960-33142-rev__Pf3D7_06_v3-1351974-1354162-for	2188	+	[ID=PF3D7_0632500;feature=gene;description=erythrocyte membrane protein 1, PfEMP1;],[ID=PF3D7_0632400;feature=gene;description=rifin;]
Pf3D7_06_v3	1351974	1354162	Pf3D7_06_v3-1351974-1354162-for__Pf3D7_10_v3-1640405-1642608-for	2188	+	[ID=PF3D7_0632500;feature=gene;description=erythrocyte membrane protein 1, PfEMP1;],[ID=PF3D7_0632400;feature=gene;description=rifin;]
Pf3D7_14_v3	5127	7315	Pf3D7_12_v3-41733-43907-for__Pf3D7_14_v3-5127-7315-for	2188	+	[ID=PF3D7_1400100;feature=gene;description="erythrocyte membrane protein 1 (PfEMP1), pseudogene";],[ID=PF3D7_1400200;feature=gene;description=rifin;]
Pf3D7_02_v3	38505	40692	Pf3D7_02_v3-38505-40692-rev__Pf3D7_10_v3-1604557-1606731-for	2187	-	[ID=PF3D7_0200400;feature=gene;description=stevor;]
Pf3D7_13_v3	2872977	2875164	Pf3D7_09_v3-1482100-1484281-for__Pf3D7_13_v3-2872977-2875164-for	2187	+	[ID=PF3D7_1373100;feature=gene;description=rifin;]
Pf3D7_11_v3	67236	69423	Pf3D7_11_v3-67236-69423-for__Pf3D7_13_v3-31152-33348-for	2187	+	[ID=PF3D7_1101100;feature=gene;description=rifin;]
Pf3D7_04_v3	26526	28712	Pf3D7_01_v3-27346-29516-for__Pf3D7_04_v3-26526-28712-for	2186	+	[ID=PF3D7_0400100;feature=gene;description=erythrocyte membrane protein 1, PfEMP1;]
Pf3D7_07_v3	53194	55380	Pf3D7_07_v3-53194-55380-for__Pf3D7_12_v3-41497-43671-for	2186	+	[ID=PF3D7_0701000;feature=gene;description="erythrocyte membrane protein 1 (PfEMP1), pseudogene";]
Pf3D7_01_v3	605411	607596	Pf3D7_01_v3-605411-607596-rev__Pf3D7_14_v3-5127-7327-for	2185	-	[ID=PF3D7_0115700;feature=gene;description=erythrocyte membrane protein 1, PfEMP1;],[ID=PF3D7_0115600;feature=gene;description=rifin;]
Pf3D7_03_v3	1063231	1065416	Pf3D7_03_v3-0-2227-for__Pf3D7_03_v3-1063231-1065416-rev	2185	-
Pf3D7_04_v3	39947	42132	Pf3D7_04_v3-39947-42132-rev__Pf3D7_12_v3-2239316-2241483-for	2185	-	[ID=PF3D7_0400200;feature=gene;description="erythrocyte membrane protein 1 (PfEMP1), exon 2, pseudogene";],[ID=PF3D7_0400300;feature=gene;description=rifin;]
Pf3D7_11_v3	64635	66820	Pf3D7_07_v3-1415548-1417794-rev__Pf3D7_11_v3-64635-66820-for	2185	+	[ID=PF3D7_1101000;feature=gene;description="erythrocyte membrane protein 1 (PfEMP1), pseudogene";],[ID=PF3D7_1101100;feature=gene;description=rifin;]
Pf3D7_10_v3	1640422	1642607	Pf3D7_07_v3-1415587-1417794-for__Pf3D7_10_v3-1640422-1642607-for	2185	+	[ID=PF3D7_1041300;feature=gene;description=erythrocyte membrane protein 1, PfEMP1;],[ID=PF3D7_1041200;feature=gene;description=rifin;]
Pf3D7_11_v3	64635	66820	Pf3D7_08_v3-1433797-1436003-rev__Pf3D7_11_v3-64635-66820-for	2185	+	[ID=PF3D7_1101000;feature=gene;description="erythrocyte membrane protein 1 (PfEMP1), pseudogene";],[ID=PF3D7_1101100;feature=gene;description=rifin;]
Pf3D7_04_v3	1171085	1173269	Pf3D7_04_v3-1171085-1173269-for__Pf3D7_09_v3-1493609-1495786-for	2184	+	[ID=PF3D7_0426000;feature=gene;description=erythrocyte membrane protein 1, PfEMP1;],[ID=PF3D7_0425900;feature=gene;description=rifin;]
Pf3D7_01_v3	36918	39101	Pf3D7_01_v3-36918-39101-rev__Pf3D7_06_v3-1351967-1354162-for	2183	-	[ID=PF3D7_0100200;feature=gene;description=rifin;],[ID=PF3D7_0100100;feature=gene;description=erythrocyte membrane protein 1, PfEMP1;]
Pf3D7_13_v3	2882819	2885002	Pf3D7_03_v3-44274-46505-rev__Pf3D7_13_v3-2882819-2885002-for	2183	+	[ID=PF3D7_1373500;feature=gene;description=erythrocyte membrane protein 1, PfEMP1;],[ID=PF3D7_1373400;feature=gene;description=rifin;]
Pf3D7_10_v3	26312	28495	Pf3D7_08_v3-1443443-1445602-rev__Pf3D7_10_v3-26312-28495-for	2183	+	[ID=PF3D7_1000100;feature=gene;description=erythrocyte membrane protein 1, PfEMP1;]
Pf3D7_02_v3	30960	33142	Pf3D7_02_v3-30960-33142-rev__Pf3D7_06_v3-1351974-1354162-for	2182	-	[ID=PF3D7_0200200;feature=gene;description=rifin;],[ID=PF3D7_0200100;feature=gene;description=erythrocyte membrane protein 1, PfEMP1;]
Pf3D7_12_v3	846	3028	Pf3D7_08_v3-1016-3231-for__Pf3D7_12_v3-846-3028-for	2182	+
Pf3D7_13_v3	51984	54165	Pf3D7_01_v3-51725-53876-for__Pf3D7_13_v3-51984-54165-for	2181	+	[ID=PF3D7_1300600;feature=gene;description=rifin;]
Pf3D7_04_v3	1171088	1173269	Pf3D7_01_v3-605435-607597-for__Pf3D7_04_v3-1171088-1173269-for	2181	+	[ID=PF3D7_0426000;feature=gene;description=erythrocyte membrane protein 1, PfEMP1;],[ID=PF3D7_0425900;feature=gene;description=rifin;]
Pf3D7_04_v3	1171088	1173269	Pf3D7_03_v3-1028833-1031029-for__Pf3D7_04_v3-1171088-1173269-for	2181	+	[ID=PF3D7_0426000;feature=gene;description=erythrocyte membrane protein 1, PfEMP1;],[ID=PF3D7_0425900;feature=gene;description=rifin;]
Pf3D7_09_v3	1482100	1484281	Pf3D7_09_v3-1482100-1484281-for__Pf3D7_13_v3-2872977-2875164-for	2181	+	[ID=PF3D7_0937500;feature=gene;description=rifin;]
Pf3D7_12_v3	2239303	2241483	Pf3D7_01_v3-36919-39095-rev__Pf3D7_12_v3-2239303-2241483-for	2180	+	[ID=PF3D7_1255100;feature=gene;description=rifin;],[ID=PF3D7_1255200;feature=gene;description=erythrocyte membrane protein 1, PfEMP1;]
Pf3D7_04_v3	1193176	1195356	Pf3D7_04_v3-1193176-1195356-for__Pf3D7_12_v3-2263915-2266082-for	2180	+
Pf3D7_13_v3	48645	50825	Pf3D7_06_v3-1339253-1341430-rev__Pf3D7_13_v3-48645-50825-for	2180	+	[ID=PF3D7_1300400;feature=gene;description=rifin;],[ID=PF3D7_1300500;feature=gene;description=rifin;]
Pf3D7_08_v3	1422755	1424935	Pf3D7_08_v3-1422755-1424935-rev__Pf3D7_09_v3-64483-66692-for	2180	-
Pf3D7_12_v3	2239303	2241483	Pf3D7_09_v3-27678-29910-rev__Pf3D7_12_v3-2239303-2241483-for	2180	+	[ID=PF3D7_1255100;feature=gene;description=rifin;],[ID=PF3D7_1255200;feature=gene;description=erythrocyte membrane protein 1, PfEMP1;]
Pf3D7_13_v3	2882823	2885002	Pf3D7_01_v3-79683-81897-rev__Pf3D7_13_v3-2882823-2885002-for	2179	+	[ID=PF3D7_1373500;feature=gene;description=erythrocyte membrane protein 1, PfEMP1;],[ID=PF3D7_1373400;feature=gene;description=rifin;]
Pf3D7_12_v3	2239304	2241483	Pf3D7_01_v3-79684-81877-rev__Pf3D7_12_v3-2239304-2241483-for	2179	+	[ID=PF3D7_1255100;feature=gene;description=rifin;],[ID=PF3D7_1255200;feature=gene;description=erythrocyte membrane protein 1, PfEMP1;]
Pf3D7_07_v3	56663	58842	Pf3D7_07_v3-56663-58842-for__Pf3D7_14_v3-8422-10655-for	2179	+	[ID=PF3D7_0701100;feature=gene;description=rifin;]
Pf3D7_09_v3	68490	70668	Pf3D7_06_v3-1339266-1341441-rev__Pf3D7_09_v3-68490-70668-for	2178	+	[ID=PF3D7_0901300;feature=gene;description=rifin;],[ID=PF3D7_0901400;feature=gene;description=rifin;]
Pf3D7_02_v3	30960	33137	Pf3D7_02_v3-30960-33137-rev__Pf3D7_04_v3-1171076-1173269-for	2177	-	[ID=PF3D7_0200200;feature=gene;description=rifin;],[ID=PF3D7_0200100;feature=gene;description=erythrocyte membrane protein 1, PfEMP1;]
Pf3D7_09_v3	1493609	1495786	Pf3D7_04_v3-1171085-1173269-for__Pf3D7_09_v3-1493609-1495786-for	2177	+	[ID=PF3D7_0937800;feature=gene;description=erythrocyte membrane protein 1, PfEMP1;],[ID=PF3D7_0937700;feature=gene;description=rifin;]
Pf3D7_06_v3	1339253	1341430	Pf3D7_06_v3-1339253-1341430-rev__Pf3D7_13_v3-48645-50825-for	2177	-	[ID=PF3D7_0632200;feature=gene;description=rifin;],[ID=PF3D7_0632100;feature=gene;description=rifin;]
Pf3D7_01_v3	36919	39095	Pf3D7_01_v3-36919-39095-rev__Pf3D7_07_v3-1415569-1417794-for	2176	-	[ID=PF3D7_0100200;feature=gene;description=rifin;],[ID=PF3D7_0100100;feature=gene;description=erythrocyte membrane protein 1, PfEMP1;]
Pf3D7_01_v3	36919	39095	Pf3D7_01_v3-36919-39095-rev__Pf3D7_12_v3-2239303-2241483-for	2176	-	[ID=PF3D7_0100200;feature=gene;description=rifin;],[ID=PF3D7_0100100;feature=gene;description=erythrocyte membrane protein 1, PfEMP1;]
Pf3D7_12_v3	41732	43907	Pf3D7_04_v3-1171076-1173269-rev__Pf3D7_12_v3-41732-43907-for	2175	+	[ID=PF3D7_1200400;feature=gene;description=erythrocyte membrane protein 1, PfEMP1;],[ID=PF3D7_1200500;feature=gene;description=rifin;]
Pf3D7_06_v3	1339266	1341441	Pf3D7_06_v3-1339266-1341441-rev__Pf3D7_09_v3-68490-70668-for	2175	-	[ID=PF3D7_0632200;feature=gene;description=rifin;],[ID=PF3D7_0632100;feature=gene;description=rifin;]
Pf3D7_10_v3	1604557	1606731	Pf3D7_02_v3-38505-40692-rev__Pf3D7_10_v3-1604557-1606731-for	2174	+	[ID=PF3D7_1040200;feature=gene;description=stevor;]
Pf3D7_12_v3	41497	43671	Pf3D7_07_v3-53194-55380-for__Pf3D7_12_v3-41497-43671-for	2174	+	[ID=PF3D7_1200400;feature=gene;description=erythrocyte membrane protein 1, PfEMP1;]
Pf3D7_12_v3	41733	43907	Pf3D7_12_v3-41733-43907-for__Pf3D7_14_v3-5127-7315-for	2174	+	[ID=PF3D7_1200400;feature=gene;description=erythrocyte membrane protein 1, PfEMP1;],[ID=PF3D7_1200500;feature=gene;description=rifin;]
Pf3D7_01_v3	79690	81863	Pf3D7_01_v3-79690-81863-for__Pf3D7_14_v3-5133-7306-for	2173	+	[ID=PF3D7_0101500;feature=gene;description="erythrocyte membrane protein 1 (PfEMP1), exon 2, pseudogene";],[ID=PF3D7_0101600;feature=gene;description=rifin;]
Pf3D7_14_v3	5133	7306	Pf3D7_01_v3-79690-81863-for__Pf3D7_14_v3-5133-7306-for	2173	+	[ID=PF3D7_1400100;feature=gene;description="erythrocyte membrane protein 1 (PfEMP1), pseudogene";],[ID=PF3D7_1400200;feature=gene;description=rifin;]
Pf3D7_07_v3	1438721	1440894	Pf3D7_07_v3-1438721-1440894-for__Pf3D7_08_v3-1463977-1466150-for	2173	+
Pf3D7_08_v3	1463977	1466150	Pf3D7_07_v3-1438721-1440894-for__Pf3D7_08_v3-1463977-1466150-for	2173	+
Pf3D7_09_v3	62294	64466	Pf3D7_09_v3-62294-64466-rev__Pf3D7_12_v3-2199593-2201745-for	2172	-	[ID=PF3D7_0901100;feature=gene;description=rifin;],[ID=PF3D7_0901200;feature=gene;description=Plasmodium exported protein, unknown function, fragment;]
Pf3D7_12_v3	2239312	2241483	Pf3D7_02_v3-914352-916567-for__Pf3D7_12_v3-2239312-2241483-for	2171	+	[ID=PF3D7_1255100;feature=gene;description=rifin;],[ID=PF3D7_1255200;feature=gene;description=erythrocyte membrane protein 1, PfEMP1;]
Pf3D7_09_v3	34936	37107	Pf3D7_08_v3-1424530-1426698-rev__Pf3D7_09_v3-34936-37107-for	2171	+
Pf3D7_01_v3	27346	29516	Pf3D7_01_v3-27346-29516-for__Pf3D7_04_v3-26526-28712-for	2170	+	[ID=PF3D7_0100100;feature=gene;description=erythrocyte membrane protein 1, PfEMP1;]
Pf3D7_02_v3	30961	33130	Pf3D7_02_v3-30961-33130-rev__Pf3D7_12_v3-2239316-2241483-for	2169	-	[ID=PF3D7_0200200;feature=gene;description=rifin;],[ID=PF3D7_0200100;feature=gene;description=erythrocyte membrane protein 1, PfEMP1;]
Pf3D7_11_v3	64450	66618	Pf3D7_03_v3-1029011-1031213-rev__Pf3D7_11_v3-64450-66618-for	2168	+	[ID=PF3D7_1101000;feature=gene;description="erythrocyte membrane protein 1 (PfEMP1), pseudogene";]
Pf3D7_08_v3	1424530	1426698	Pf3D7_08_v3-1424530-1426698-rev__Pf3D7_09_v3-34936-37107-for	2168	-
Pf3D7_02_v3	30961	33128	Pf3D7_02_v3-30961-33128-rev__Pf3D7_07_v3-1415584-1417794-for	2167	-	[ID=PF3D7_0200200;feature=gene;description=rifin;],[ID=PF3D7_0200100;feature=gene;description=erythrocyte membrane protein 1, PfEMP1;]
Pf3D7_12_v3	2239316	2241483	Pf3D7_02_v3-30961-33130-rev__Pf3D7_12_v3-2239316-2241483-for	2167	+	[ID=PF3D7_1255100;feature=gene;description=rifin;],[ID=PF3D7_1255200;feature=gene;description=erythrocyte membrane protein 1, PfEMP1;]
Pf3D7_13_v3	28568	30735	Pf3D7_02_v3-914326-916567-rev__Pf3D7_13_v3-28568-30735-for	2167	+	[ID=PF3D7_1300100;feature=gene;description=erythrocyte membrane protein 1, PfEMP1;],[ID=PF3D7_1300200;feature=gene;description=rifin;]
Pf3D7_12_v3	2263915	2266082	Pf3D7_04_v3-1193176-1195356-for__Pf3D7_12_v3-2263915-2266082-for	2167	+
Pf3D7_12_v3	2239316	2241483	Pf3D7_04_v3-39947-42132-rev__Pf3D7_12_v3-2239316-2241483-for	2167	+	[ID=PF3D7_1255100;feature=gene;description=rifin;],[ID=PF3D7_1255200;feature=gene;description=erythrocyte membrane protein 1, PfEMP1;]
Pf3D7_09_v3	1490628	1492795	Pf3D7_09_v3-1490628-1492795-for__Pf3D7_10_v3-1637440-1639593-for	2167	+	[ID=PF3D7_0937700;feature=gene;description=rifin;]
Pf3D7_12_v3	2239316	2241483	Pf3D7_10_v3-1640417-1642607-for__Pf3D7_12_v3-2239316-2241483-for	2167	+	[ID=PF3D7_1255100;feature=gene;description=rifin;],[ID=PF3D7_1255200;feature=gene;description=erythrocyte membrane protein 1, PfEMP1;]
Pf3D7_12_v3	41733	43900	Pf3D7_12_v3-2239316-2241483-for__Pf3D7_12_v3-41733-43900-rev	2167	-	[ID=PF3D7_1200400;feature=gene;description=erythrocyte membrane protein 1, PfEMP1;],[ID=PF3D7_1200500;feature=gene;description=rifin;]
Pf3D7_12_v3	2239316	2241483	Pf3D7_12_v3-2239316-2241483-for__Pf3D7_12_v3-41733-43900-rev	2167	+	[ID=PF3D7_1255100;feature=gene;description=rifin;],[ID=PF3D7_1255200;feature=gene;description=erythrocyte membrane protein 1, PfEMP1;]
Pf3D7_12_v3	2239316	2241483	Pf3D7_12_v3-2239316-2241483-rev__Pf3D7_12_v3-41733-43900-for	2167	-	[ID=PF3D7_1255100;feature=gene;description=rifin;],[ID=PF3D7_1255200;feature=gene;description=erythrocyte membrane protein 1, PfEMP1;]
Pf3D7_12_v3	41733	43900	Pf3D7_12_v3-2239316-2241483-rev__Pf3D7_12_v3-41733-43900-for	2167	+	[ID=PF3D7_1200400;feature=gene;description=erythrocyte membrane protein 1, PfEMP1;],[ID=PF3D7_1200500;feature=gene;description=rifin;]
Pf3D7_11_v3	64641	66805	Pf3D7_11_v3-64641-66805-for__Pf3D7_14_v3-5133-7327-for	2164	+	[ID=PF3D7_1101000;feature=gene;description="erythrocyte membrane protein 1 (PfEMP1), pseudogene";],[ID=PF3D7_1101100;feature=gene;description=rifin;]
Pf3D7_07_v3	1441493	1443656	Pf3D7_02_v3-941832-943956-for__Pf3D7_07_v3-1441493-1443656-for	2163	+
Pf3D7_01_v3	605435	607597	Pf3D7_01_v3-605435-607597-for__Pf3D7_04_v3-1171088-1173269-for	2162	+	[ID=PF3D7_0115700;feature=gene;description=erythrocyte membrane protein 1, PfEMP1;],[ID=PF3D7_0115600;feature=gene;description=rifin;]
Pf3D7_06_v3	1373034	1375196	Pf3D7_02_v3-30786-32895-rev__Pf3D7_06_v3-1373034-1375196-for	2162	+	[ID=PF3D7_0632800;feature=gene;description=erythrocyte membrane protein 1, PfEMP1;]
Pf3D7_11_v3	46104	48266	Pf3D7_03_v3-62585-64726-for__Pf3D7_11_v3-46104-48266-for	2162	+	[ID=PF3D7_1100300;feature=gene;description=rifin;],[ID=PF3D7_1100400;feature=gene;description=rifin;]
Pf3D7_05_v3	3135	5297	Pf3D7_04_v3-2801-4960-for__Pf3D7_05_v3-3135-5297-for	2162	+
Pf3D7_13_v3	3570	5732	Pf3D7_04_v3-2801-4960-for__Pf3D7_13_v3-3570-5732-for	2162	+
Pf3D7_04_v3	40004	42166	Pf3D7_04_v3-40004-42166-rev__Pf3D7_06_v3-1372726-1374949-for	2162	-	[ID=PF3D7_0400200;feature=gene;description="erythrocyte membrane protein 1 (PfEMP1), exon 2, pseudogene";],[ID=PF3D7_0400300;feature=gene;description=rifin;]
Pf3D7_12_v3	2232982	2235142	Pf3D7_03_v3-1017258-1019404-for__Pf3D7_12_v3-2232982-2235142-for	2160	+	[ID=PF3D7_1255000;feature=gene;description=rifin;]
Pf3D7_07_v3	53224	55384	Pf3D7_04_v3-39741-41896-for__Pf3D7_07_v3-53224-55384-for	2160	+	[ID=PF3D7_0701000;feature=gene;description="erythrocyte membrane protein 1 (PfEMP1), pseudogene";]
Pf3D7_11_v3	64634	66793	Pf3D7_04_v3-1171076-1173269-rev__Pf3D7_11_v3-64634-66793-for	2159	+	[ID=PF3D7_1101000;feature=gene;description="erythrocyte membrane protein 1 (PfEMP1), pseudogene";],[ID=PF3D7_1101100;feature=gene;description=rifin;]
Pf3D7_04_v3	2801	4960	Pf3D7_04_v3-2801-4960-for__Pf3D7_05_v3-3135-5297-for	2159	+
Pf3D7_04_v3	2801	4960	Pf3D7_04_v3-2801-4960-for__Pf3D7_13_v3-3570-5732-for	2159	+
Pf3D7_08_v3	1443443	1445602	Pf3D7_08_v3-1443443-1445602-rev__Pf3D7_10_v3-26312-28495-for	2159	-	[ID=PF3D7_0833500;feature=gene;description=erythrocyte membrane protein 1, PfEMP1;]
Pf3D7_03_v3	1064399	1066557	Pf3D7_03_v3-1064399-1066557-for__Pf3D7_03_v3-1446-3600-rev	2158	+
Pf3D7_09_v3	2048	4206	Pf3D7_09_v3-2048-4206-for__Pf3D7_11_v3-3627-5784-for	2158	+
Pf3D7_13_v3	2879853	2882010	Pf3D7_04_v3-1168262-1170397-for__Pf3D7_13_v3-2879853-2882010-for	2157	+	[ID=PF3D7_1373400;feature=gene;description=rifin;]
Pf3D7_07_v3	1415767	1417924	Pf3D7_07_v3-1415767-1417924-for__Pf3D7_13_v3-2883025-2885131-for	2157	+	[ID=PF3D7_0733000;feature=gene;description=erythrocyte membrane protein 1, PfEMP1;]
Pf3D7_11_v3	3627	5784	Pf3D7_09_v3-2048-4206-for__Pf3D7_11_v3-3627-5784-for	2157	+
Pf3D7_03_v3	8523	10679	Pf3D7_03_v3-1055743-1057898-for__Pf3D7_03_v3-8523-10679-rev	2156	-
Pf3D7_03_v3	8523	10679	Pf3D7_03_v3-1055743-1057898-rev__Pf3D7_03_v3-8523-10679-for	2156	+
Pf3D7_13_v3	2879853	2882009	Pf3D7_03_v3-47162-49315-rev__Pf3D7_13_v3-2879853-2882009-for	2156	+	[ID=PF3D7_1373400;feature=gene;description=rifin;]
Pf3D7_07_v3	1412693	1414849	Pf3D7_07_v3-1412693-1414849-rev__Pf3D7_09_v3-30741-32891-for	2156	-	[ID=PF3D7_0732900;feature=gene;description=rifin;]
Pf3D7_07_v3	1415768	1417924	Pf3D7_07_v3-1415768-1417924-rev__Pf3D7_14_v3-4997-7132-for	2156	-	[ID=PF3D7_0733000;feature=gene;description=erythrocyte membrane protein 1, PfEMP1;]
Pf3D7_03_v3	1055743	1057898	Pf3D7_03_v3-1055743-1057898-for__Pf3D7_03_v3-8523-10679-rev	2155	+
Pf3D7_03_v3	1055743	1057898	Pf3D7_03_v3-1055743-1057898-rev__Pf3D7_03_v3-8523-10679-for	2155	-
Pf3D7_04_v3	39741	41896	Pf3D7_04_v3-39741-41896-for__Pf3D7_07_v3-53224-55384-for	2155	+	[ID=PF3D7_0400200;feature=gene;description="erythrocyte membrane protein 1 (PfEMP1), exon 2, pseudogene";]
Pf3D7_03_v3	1446	3600	Pf3D7_03_v3-1064399-1066557-for__Pf3D7_03_v3-1446-3600-rev	2154	-
Pf3D7_06_v3	1369753	1371907	Pf3D7_04_v3-1168262-1170386-for__Pf3D7_06_v3-1369753-1371907-for	2154	+	[ID=PF3D7_0632700;feature=gene;description=rifin;]
Pf3D7_03_v3	47162	49315	Pf3D7_03_v3-47162-49315-rev__Pf3D7_13_v3-2879853-2882009-for	2153	-	[ID=PF3D7_0300200;feature=gene;description=rifin;]
Pf3D7_10_v3	1637440	1639593	Pf3D7_09_v3-1490628-1492795-for__Pf3D7_10_v3-1637440-1639593-for	2153	+	[ID=PF3D7_1041200;feature=gene;description=rifin;]
Pf3D7_12_v3	2199593	2201745	Pf3D7_09_v3-62294-64466-rev__Pf3D7_12_v3-2199593-2201745-for	2152	+	[ID=PF3D7_1253900;feature=gene;description="Plasmodium exported protein (PHISTa), unknown function, pseudogene";],[ID=PF3D7_1254000;feature=gene;description=rifin;]
Pf3D7_01_v3	51725	53876	Pf3D7_01_v3-51725-53876-for__Pf3D7_13_v3-51984-54165-for	2151	+	[ID=PF3D7_0100500;feature=gene;description="erythrocyte membrane protein 1 (PfEMP1), exon 1, pseudogene";],[ID=PF3D7_0100600;feature=gene;description=rifin;]
Pf3D7_03_v3	1029063	1031213	Pf3D7_03_v3-1029063-1031213-rev__Pf3D7_07_v3-53244-55388-for	2150	-	[ID=PF3D7_0324900;feature=gene;description=erythrocyte membrane protein 1, PfEMP1;]
Pf3D7_09_v3	30741	32891	Pf3D7_07_v3-1412693-1414849-rev__Pf3D7_09_v3-30741-32891-for	2150	+	[ID=PF3D7_0900200;feature=gene;description=rifin;]
Pf3D7_10_v3	1633552	1635700	Pf3D7_02_v3-905662-907782-for__Pf3D7_10_v3-1633552-1635700-for	2148	+	[ID=PF3D7_1041000;feature=gene;description=rifin;],[ID=PF3D7_1041100;feature=gene;description=rifin;]
Pf3D7_13_v3	55091	57239	Pf3D7_09_v3-43885-46032-for__Pf3D7_13_v3-55091-57239-for	2148	+	[ID=PF3D7_1300600;feature=gene;description=rifin;],[ID=PF3D7_1300700;feature=gene;description=rifin;]
Pf3D7_13_v3	31474	33621	Pf3D7_02_v3-911504-913650-rev__Pf3D7_13_v3-31474-33621-for	2147	+	[ID=PF3D7_1300200;feature=gene;description=rifin;]
Pf3D7_02_v3	911504	913651	Pf3D7_02_v3-911504-913651-rev__Pf3D7_12_v3-27279-29417-for	2147	-	[ID=PF3D7_0223400;feature=gene;description=rifin;]
Pf3D7_09_v3	43885	46032	Pf3D7_09_v3-43885-46032-for__Pf3D7_13_v3-55091-57239-for	2147	+	[ID=PF3D7_0900500;feature=gene;description=rifin;],[ID=PF3D7_0900600;feature=gene;description=rifin;]
Pf3D7_01_v3	48806	50952	Pf3D7_01_v3-48806-50952-rev__Pf3D7_11_v3-2022441-2024574-for	2146	-	[ID=PF3D7_0100400;feature=gene;description=rifin;]
[truncated: 3,604 more rows]
